# Supplementary material for: Alpha-2-Macroglobulin as a New Promising Biomarker Improving the Diagnostic Sensitivity of Bovine Paratuberculosis
Source: Frontiers journal article supplement (doi:10.3389/fvets.2021.637716), 2021-03-05
Supplement: Data_Sheet_1.zip [file Data_Sheet_1.zip]

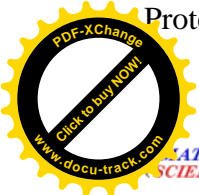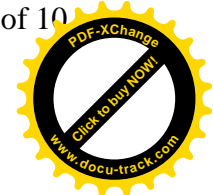

# Mascot Search Results

User :  
 Email :  
 Search title : BAEDW\2019\_10\_16\2019\_10\_16\MSMS 5\D1  
 Database : NCBIInr 20131104 (33815671 sequences; 11795550776 residues)  
 Timestamp : 15 Oct 2019 at 10:55:09 GMT  
 Warning : A Peptide summary report will usually give a much clearer picture of MS/MS search results.  
 Top Score : 50 for [gi|2232299](#), IgM heavy chain constant region [Bos taurus]

## Mascot Score Histogram

Protein score is  $-10 \times \log(P)$ , where P is the probability that the observed match is a random event.  
 Protein scores greater than 88 are significant ( $p < 0.05$ ).  
 Protein scores are derived from ions scores as a non-probabilistic basis for ranking protein hits.

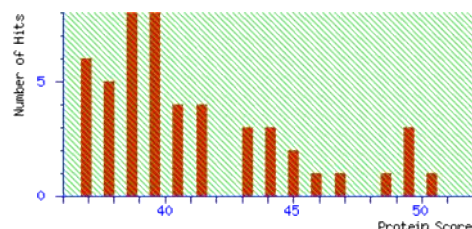

## Protein Summary Report

Format As  [Help](#)

Significance threshold  $p <$   Max. number of hits

## Index

| Accession                        | Mass   | Score | Description                                                                                            |
|----------------------------------|--------|-------|--------------------------------------------------------------------------------------------------------|
| 1. <a href="#">gi 2232299</a>    | 48512  | 50    | IgM heavy chain constant region [Bos taurus]                                                           |
| 2. <a href="#">gi 33413902</a>   | 49848  | 50    | immunoglobulin mu heavy chain constant region [Bos taurus]                                             |
| 3. <a href="#">gi 206597414</a>  | 28268  | 50    | Major histocompatibility complex class II beta chain BMA2, (similar to HLA class II, D beta chain) pre |
| 4. <a href="#">gi 34538498</a>   | 50536  | 50    | immunoglobulin heavy chain constant region [Bos taurus]                                                |
| 5. <a href="#">gi 518349625</a>  | 5336   | 48    | hypothetical protein [Moraxella boeveyi]                                                               |
| 6. <a href="#">gi 494742220</a>  | 17861  | 47    | 3-hydroxyacyl-ACP dehydratase [Bartonella melophagi]                                                   |
| 7. <a href="#">gi 518846823</a>  | 5061   | 46    | hypothetical protein [Mycoplasma hominis]                                                              |
| 8. <a href="#">gi 488818860</a>  | 9345   | 45    | hypothetical protein [Phaeosporidium molischianum]                                                     |
| 9. <a href="#">gi 446609084</a>  | 31602  | 45    | prephenate dehydratase [Streptococcus oralis]                                                          |
| 10. <a href="#">gi 518026209</a> | 30111  | 44    | serine acetyltransferase [Afipia birgiae]                                                              |
| 11. <a href="#">gi 24496448</a>  | 66533  | 44    | immunoglobulin M heavy chain secretory form [Bos taurus]                                               |
| 12. <a href="#">gi 547755423</a> | 19340  | 44    | ribosome maturation factor RimM [Clostridium sp. CAG:221]                                              |
| 13. <a href="#">gi 492049521</a> | 6980   | 43    | hypothetical protein [Pseudomonas amygdali]                                                            |
| 14. <a href="#">gi 488127006</a> | 5046   | 43    | hypothetical protein, partial [Helicobacter pylori]                                                    |
| 15. <a href="#">gi 68535459</a>  | 8368   | 43    | hypothetical protein jk0392 [Corynebacterium jeikeium K411]                                            |
| 16. <a href="#">gi 3834667</a>   | 48810  | 42    | immunoglobulin heavy chain constant region [Bos taurus]                                                |
| 17. <a href="#">gi 547238705</a> | 13800  | 42    | ribosomal protein S13 [Firmicutes bacterium CAG:884]                                                   |
| 18. <a href="#">gi 345564418</a> | 28894  | 41    | hypothetical protein AOL_s00083g474 [Arthrobotrys oligospora ATCC 24927]                               |
| 19. <a href="#">gi 517947175</a> | 20170  | 41    | hypothetical protein [Anaerococcus sp. PH9]                                                            |
| 20. <a href="#">gi 522808524</a> | 25797  | 41    | hypothetical protein [Mycobacterium marinum]                                                           |
| 21. <a href="#">gi 550715204</a> | 37257  | 41    | transcriptional activator FtrA [Enterobacter sp. MGH 8]                                                |
| 22. <a href="#">gi 516231730</a> | 9834   | 41    | hypothetical protein [Vibrio sp. 71211]                                                                |
| 23. <a href="#">gi 517496258</a> | 32907  | 40    | hypothetical protein [Bacteroides gallinarum]                                                          |
| 24. <a href="#">gi 183984872</a> | 25857  | 40    | hypothetical protein MMAR_4904 [Mycobacterium marinum M]                                               |
| 25. <a href="#">gi 443492961</a> | 25831  | 40    | putative deacetylase [Mycobacterium liflandii 128FXT]                                                  |
| 26. <a href="#">gi 118616343</a> | 25912  | 39    | hypothetical protein MUL_0502 [Mycobacterium ulcerans Ag99]                                            |
| 27. <a href="#">gi 491438800</a> | 10485  | 39    | acetyltransferase [Corynebacterium jeikeium]                                                           |
| 28. <a href="#">gi 491891625</a> | 32908  | 39    | hypothetical protein [Bacteroides stercoris]                                                           |
| 29. <a href="#">gi 547517138</a> | 32936  | 39    | uncharacterized protein [Bacteroides stercoris CAG:120]                                                |
| 30. <a href="#">gi 517368986</a> | 14244  | 39    | 30S ribosomal protein S13 [Streptomyces sp. LaPPAH-108]                                                |
| 31. <a href="#">gi 516399639</a> | 5928   | 39    | integrase [Vibrio vulnificus]                                                                          |
| 32. <a href="#">gi 479181342</a> | 3438   | 39    | Helix-turn-helix domain of resolvase. [Enterococcus sp. 7L76]                                          |
| 33. <a href="#">gi 491349492</a> | 31061  | 39    | hypothetical protein [Gordonia sputi]                                                                  |
| 34. <a href="#">gi 493388713</a> | 17048  | 39    | MarR family transcriptional regulator [Streptomyces tsukubaensis]                                      |
| 35. <a href="#">gi 551036884</a> | 33460  | 39    | hypothetical protein [Lachnospiraceae bacterium NK4A136]                                               |
| 36. <a href="#">gi 320333797</a> | 39533  | 39    | phospho-2-dehydro-3-deoxyheptonate aldolase [Deinococcus maricopensis DSM 21211]                       |
| 37. <a href="#">gi 409039618</a> | 29114  | 38    | hypothetical protein PHACADRAFT_201965 [Phanerochaete carnosae HHB-10118-sp]                           |
| 38. <a href="#">gi 187251559</a> | 20917  | 38    | cross-over junction endonuclease RuvC [Elusimicrobium minutum Pei191]                                  |
| 39. <a href="#">gi 261260695</a> | 10351  | 38    | Yclm [Bacillus amyloliquefaciens]                                                                      |
| 40. <a href="#">gi 517051098</a> | 27685  | 38    | transcriptional regulator [Rhizobium sp. BR816]                                                        |
| 41. <a href="#">gi 444720581</a> | 100358 | 38    | General transcription factor II-I [Tupaia chinensis]                                                   |
| 42. <a href="#">gi 71039991</a>  | 32224  | 38    | conserved ATPase domain protein [Macropis nuda]                                                        |
| 43. <a href="#">gi 490661404</a> | 4181   | 38    | hypothetical protein [Burkholderia pseudomallei]                                                       |
| 44. <a href="#">gi 489236824</a> | 65949  | 37    | multidrug ABC transporter ATP-binding protein [Gemella haemolysans]                                    |
| 45. <a href="#">gi 547230974</a> | 17853  | 37    | transposase [Bacteroides intestinalis CAG:564]                                                         |
| 46. <a href="#">gi 494229523</a> | 4528   | 37    | hypothetical protein [Flavobacterium frigidis]                                                         |
| 47. <a href="#">gi 28493757</a>  | 41909  | 37    | pyruvate dehydrogenase E1 component alpha subunit [Tropheryma whippelii str. Twist]                    |
| 48. <a href="#">gi 517826373</a> | 12209  | 37    | hypothetical protein [Hirschia maritima]                                                               |
| 49. <a href="#">gi 446609078</a> | 29288  | 37    | prephenate dehydratase, partial [Streptococcus sp. GMD1S]                                              |
| 50. <a href="#">gi 551565531</a> | 42563  | 37    | hypothetical protein EMIHUADRAFT_210302 [Emiliania huxleyi CCMP1516]                                   |

## Results List

| 1.                                           | <a href="#">gi 2232299</a> | Mass: 48512 | Score: 50 | Expect: 3.1e+002 | Matches: 9            |
|----------------------------------------------|----------------------------|-------------|-----------|------------------|-----------------------|
| IgM heavy chain constant region [Bos taurus] |                            |             |           |                  |                       |
| Observed                                     | Mr (expt)                  | Mr (calc)   | ppm       | Start            | End Miss Ions Peptide |
| 1036.6012                                    | 1035.5939                  | 1035.5502   | 42.3      | 148 - 155        | 0 --- K.QISLSWFR.D    |
| 1036.6012                                    | 1035.5939                  | 1035.5502   | 42.3      | 148 - 155        | 0 --- K.QISLSWFR.D    |

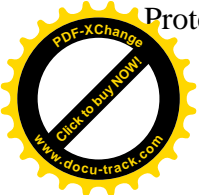

```

1194.6759 1193.6686 1193.6233 37.9 54 - 62 0 --- R.FWTFPEVL.R.D
1194.6759 1193.6686 1193.6233 37.9 54 - 62 0 18 R.FWTFPEVL.R.D
1266.6686 1265.6613 1265.6040 45.3 269 - 278 0 --- K.ALETHTYFER.H
1595.9777 1594.9704 1594.9083 38.9 110 - 124 0 --- K.AEVLSPVSVFVPPR.N
1595.9777 1594.9704 1594.9083 39.0 110 - 124 0 --- K.AEVLSPVSVFVPPR.N
1633.9124 1632.9051 1632.8413 39.1 357 - 370 0 --- K.GFAPADVFVQWLQR.G
1784.0413 1783.0340 1782.9702 35.8 325 - 340 0 --- K.DVAMKPPSVYLLPPTR.E

```

**No match to:** 842.5546, 848.5696, 850.5803, 853.5549, 853.5549, 855.0955, 864.5864, 868.5867, 868.5867, 871.0599, 877.0814, 882.5994, 882.5994, 887.0316, 909.0287, 951.6699, 960.9595, 1017.7114, 1019.5801, 1019.7258, 1033.7395, 1051.7457, 1051.7457, 1060.1041, 1082.0940, 1098.0653, 1151.7755, 1151.7755, 1165.7815, 1165.7815, 1277.7600, 1296.7419, 1334.9314, 1334.9314, 1448.9645, 1448.9645, 1475.8114, 1487.8091, 1618.1177, 1618.1177, 1732.1512, 1902.3138, 1994.0560, 2221.2212, 2284.2476

2. [gi|33413902](#) Mass: 49848 Score: 50 Expect: 3.5e+002 Matches: 9

immunoglobulin mu heavy chain constant region [Bos taurus]

| Observed  | Mr(expt)  | Mr(calc)  | ppm  | Start | End | Miss | Ions | Peptide              |
|-----------|-----------|-----------|------|-------|-----|------|------|----------------------|
| 1036.6012 | 1035.5939 | 1035.5502 | 42.3 | 142   | -   | 149  | 0    | K.QISLSWFR.D         |
| 1036.6012 | 1035.5939 | 1035.5502 | 42.3 | 142   | -   | 149  | 0    | K.QISLSWFR.D         |
| 1194.6759 | 1193.6686 | 1193.6233 | 37.9 | 48    | -   | 56   | 0    | R.FWTFPEVL.R.D       |
| 1194.6759 | 1193.6686 | 1193.6233 | 37.9 | 48    | -   | 56   | 0    | R.FWTFPEVL.R.D       |
| 1266.6686 | 1265.6613 | 1265.6040 | 45.3 | 263   | -   | 272  | 0    | K.ALETHTYFER.H       |
| 1595.9777 | 1594.9704 | 1594.9083 | 38.9 | 104   | -   | 118  | 0    | K.AEVLSPVSVFVPPR.N   |
| 1595.9777 | 1594.9704 | 1594.9083 | 39.0 | 104   | -   | 118  | 0    | K.AEVLSPVSVFVPPR.N   |
| 1633.9124 | 1632.9051 | 1632.8413 | 39.1 | 351   | -   | 364  | 0    | K.GFAPADVFVQWLQR.G   |
| 1784.0413 | 1783.0340 | 1782.9702 | 35.8 | 319   | -   | 334  | 0    | K.DVAMKPPSVYLLPPTR.E |

**No match to:** 842.5546, 848.5696, 850.5803, 853.5549, 853.5549, 855.0955, 864.5864, 868.5867, 868.5867, 871.0599, 877.0814, 882.5994, 882.5994, 887.0316, 909.0287, 951.6699, 960.9595, 1017.7114, 1019.5801, 1019.7258, 1033.7395, 1051.7457, 1051.7457, 1060.1041, 1082.0940, 1098.0653, 1151.7755, 1151.7755, 1165.7815, 1165.7815, 1277.7600, 1296.7419, 1334.9314, 1334.9314, 1448.9645, 1448.9645, 1475.8114, 1487.8091, 1618.1177, 1618.1177, 1732.1512, 1902.3138, 1994.0560, 2221.2212, 2284.2476

3. [gi|206597414](#) Mass: 28268 Score: 50 Expect: 3.6e+002 Matches: 5

Major histocompatibility complex class II beta chain BMA2, (similar to HLA class II, D beta chain) precursor [Gallus gallus]

| Observed  | Mr(expt)  | Mr(calc)  | ppm    | Start | End | Miss | Ions | Peptide            |
|-----------|-----------|-----------|--------|-------|-----|------|------|--------------------|
| 1165.7815 | 1164.7742 | 1164.7958 | -18.54 | 2     | -   | 12   | 0    | M.LVLLGLLLGVR.G    |
| 1165.7815 | 1164.7742 | 1164.7958 | -18.53 | 2     | -   | 12   | 0    | M.LVLLGLLLGVR.G    |
| 1296.7419 | 1295.7346 | 1295.8363 | -78.45 | 1     | -   | 12   | 0    | -MLVLLGLLLGVR.G    |
| 1448.9645 | 1447.9572 | 1447.8147 | 98.4   | 115   | -   | 128  | 0    | R.IVPAQTGNPSVIPR.L |
| 1448.9645 | 1447.9572 | 1447.8147 | 98.4   | 115   | -   | 128  | 0    | R.IVPAQTGNPSVIPR.L |

**No match to:** 842.5546, 848.5696, 850.5803, 853.5549, 853.5549, 855.0955, 864.5864, 868.5867, 868.5867, 871.0599, 877.0814, 882.5994, 882.5994, 887.0316, 909.0287, 951.6699, 960.9595, 1017.7114, 1019.5801, 1019.7258, 1033.7395, 1036.6012, 1036.6012, 1051.7457, 1051.7457, 1060.1041, 1082.0940, 1098.0653, 1151.7755, 1151.7755, 1165.7815, 1165.7815, 1194.6759, 1194.6759, 1266.6686, 1277.7600, 1334.9314, 1334.9314, 1475.8114, 1487.8091, 1595.9777, 1595.9777, 1618.1177, 1618.1177, 1633.9124, 1732.1512, 1784.0413, 1902.3138, 1994.0560, 2221.2212, 2284.2476

4. [gi|34538498](#) Mass: 50536 Score: 50 Expect: 3.7e+002 Matches: 9

immunoglobulin heavy chain constant region [Bos taurus]

| Observed  | Mr(expt)  | Mr(calc)  | ppm  | Start | End | Miss | Ions | Peptide              |
|-----------|-----------|-----------|------|-------|-----|------|------|----------------------|
| 1036.6012 | 1035.5939 | 1035.5502 | 42.3 | 142   | -   | 149  | 0    | K.QISLSWFR.D         |
| 1036.6012 | 1035.5939 | 1035.5502 | 42.3 | 142   | -   | 149  | 0    | K.QISLSWFR.D         |
| 1194.6759 | 1193.6686 | 1193.6233 | 37.9 | 48    | -   | 56   | 0    | R.FWTFPEVL.R.D       |
| 1194.6759 | 1193.6686 | 1193.6233 | 37.9 | 48    | -   | 56   | 0    | R.FWTFPEVL.R.D       |
| 1266.6686 | 1265.6613 | 1265.6040 | 45.3 | 263   | -   | 272  | 0    | K.ALETHTYFER.H       |
| 1595.9777 | 1594.9704 | 1594.9083 | 38.9 | 104   | -   | 118  | 0    | K.AEVLSPVSVFVPPR.N   |
| 1595.9777 | 1594.9704 | 1594.9083 | 39.0 | 104   | -   | 118  | 0    | K.AEVLSPVSVFVPPR.N   |
| 1633.9124 | 1632.9051 | 1632.8413 | 39.1 | 351   | -   | 364  | 0    | K.GFAPADVFVQWLQR.G   |
| 1784.0413 | 1783.0340 | 1782.9702 | 35.8 | 319   | -   | 334  | 0    | K.DVAMKPPSVYLLPPTR.E |

**No match to:** 842.5546, 848.5696, 850.5803, 853.5549, 853.5549, 855.0955, 864.5864, 868.5867, 868.5867, 871.0599, 877.0814, 882.5994, 882.5994, 887.0316, 909.0287, 951.6699, 960.9595, 1017.7114, 1019.5801, 1019.7258, 1033.7395, 1051.7457, 1051.7457, 1060.1041, 1082.0940, 1098.0653, 1151.7755, 1151.7755, 1165.7815, 1165.7815, 1277.7600, 1296.7419, 1334.9314, 1334.9314, 1448.9645, 1448.9645, 1475.8114, 1487.8091, 1618.1177, 1618.1177, 1732.1512, 1902.3138, 1994.0560, 2221.2212, 2284.2476

5. [gi|518349625](#) Mass: 5336 Score: 48 Expect: 4.9e+002 Matches: 7

hypothetical protein [Moraxella boeuvrei]

| Observed  | Mr(expt)  | Mr(calc)  | ppm  | Start | End | Miss | Ions | Peptide                        |
|-----------|-----------|-----------|------|-------|-----|------|------|--------------------------------|
| 848.5696  | 847.5623  | 847.5068  | 65.5 | 23    | -   | 28   | 1    | K.WRFLVK.I                     |
| 853.5549  | 852.5476  | 852.5109  | 43.1 | 12    | -   | 18   | 0    | K.IGYFLPK.I                    |
| 853.5549  | 852.5477  | 852.5109  | 43.1 | 12    | -   | 18   | 0    | K.IGYFLPK.I                    |
| 1165.7815 | 1164.7742 | 1164.7270 | 40.5 | 12    | -   | 21   | 1    | K.IGYFLPKIAK.K                 |
| 1165.7815 | 1164.7742 | 1164.7270 | 40.5 | 12    | -   | 21   | 1    | K.IGYFLPKIAK.K                 |
| 1277.7600 | 1276.7527 | 1276.6856 | 52.6 | 2     | -   | 11   | 1    | M.FGYLDFDIKK.I                 |
| 1296.7419 | 1295.7346 | 1295.6260 | 83.8 | 1     | -   | 10   | 0    | -MFGYLFDFDIK.K + Oxidation (M) |

**No match to:** 842.5546, 850.5803, 855.0955, 864.5864, 868.5867, 868.5867, 871.0599, 877.0814, 882.5994, 882.5994, 887.0316, 909.0287, 951.6699, 960.9595, 1017.7114, 1019.5801, 1019.7258, 1033.7395, 1036.6012, 1036.6012, 1051.7457, 1051.7457, 1060.1041, 1082.0940, 1098.0653, 1151.7755, 1151.7755, 1194.6759, 1194.6759, 1266.6686, 1334.9314, 1334.9314, 1448.9645, 1448.9645, 1475.8114, 1487.8091, 1595.9777, 1595.9777, 1618.1177, 1618.1177, 1633.9124, 1732.1512, 1784.0413, 1902.3138, 1994.0560, 2221.2212, 2284.2476

6. [gi|494742220](#) Mass: 17861 Score: 47 Expect: 7.1e+002 Matches: 8

3-hydroxyacyl-ACP dehydratase [Bartonella melophagi]

| Observed  | Mr(expt)  | Mr(calc)  | ppm  | Start | End | Miss | Ions | Peptide               |
|-----------|-----------|-----------|------|-------|-----|------|------|-----------------------|
| 850.5803  | 849.5730  | 849.5436  | 34.6 | 117   | -   | 123  | 0    | K.LHVQLLK.K           |
| 1019.5801 | 1018.5728 | 1018.5183 | 53.6 | 9     | -   | 17   | 0    | K.SLETVDIDK.L         |
| 1036.6012 | 1035.5939 | 1035.5753 | 18.0 | 26    | -   | 33   | 0    | R.YPFLIDR.I           |
| 1036.6012 | 1035.5939 | 1035.5753 | 18.0 | 26    | -   | 33   | 0    | R.YPFLIDR.I           |
| 1266.6686 | 1265.6613 | 1265.6074 | 42.6 | 131   | -   | 141  | 0    | R.FSCVAEVEGIR.V       |
| 1595.9777 | 1594.9704 | 1594.8752 | 59.7 | 91    | -   | 104  | 1    | K.KTSLIYLMTVNNAK.F    |
| 1595.9777 | 1594.9704 | 1594.8752 | 59.7 | 91    | -   | 104  | 1    | K.KTSLIYLMTVNNAK.F    |
| 1994.0560 | 1993.0487 | 1992.9747 | 37.1 | 142   | -   | 159  | 0    | R.VSEAEVSAIMEVEQTMK.- |

**No match to:** 842.5546, 848.5696, 853.5549, 853.5549, 855.0955, 864.5864, 868.5867, 868.5867, 871.0599, 877.0814, 882.5994, 882.5994, 887.0316, 909.0287, 951.6699, 960.9595, 1017.7114, 1019.7258, 1033.7395, 1051.7457, 1051.7457, 1060.1041, 1082.0940, 1098.0653, 1151.7755, 1151.7755, 1165.7815, 1165.7815, 1194.6759, 1194.6759, 1266.6686, 1296.7419, 1334.9314, 1334.9314, 1448.9645, 1448.9645, 1475.8114, 1487.8091, 1618.1177, 1618.1177, 1633.9124, 1732.1512, 1784.0413, 1902.3138, 2221.2212, 2284.2476

7. [gi|518846823](#) Mass: 5061 Score: 46 Expect: 7.9e+002 Matches: 6

hypothetical protein [Mycoplasma hominis]



| Observed  | Mr(expt)  | Mr(calc)  | ppm    | Start | End | Miss | Ions | Peptide                                |
|-----------|-----------|-----------|--------|-------|-----|------|------|----------------------------------------|
| 1296.7419 | 1295.7346 | 1295.6948 | 30.8   | 33    | -   | 42   | 1    | --- K.IFLCNEKLLF.-                     |
| 1448.9645 | 1447.9572 | 1447.9418 | 10.6   | 2     | -   | 13   | 0    | --- M.LVYITIIILLIFK.G                  |
| 1448.9645 | 1447.9572 | 1447.9418 | 10.7   | 2     | -   | 13   | 0    | --- M.LVYITIIILLIFK.G                  |
| 1595.9777 | 1594.9704 | 1594.9772 | -4.27  | 1     | -   | 13   | 0    | --- -.MLVYITIIILLIFK.G + Oxidation (M) |
| 1595.9777 | 1594.9704 | 1594.9772 | -4.24  | 1     | -   | 13   | 0    | --- -.MLVYITIIILLIFK.G + Oxidation (M) |
| 1633.9124 | 1632.9051 | 1633.0582 | -93.74 | 2     | -   | 15   | 1    | --- M.LVYITIIILLIFK.GK.K               |

**No match to:** 842.5546, 848.5696, 850.5803, 853.5549, 853.5549, 855.0955, 864.5864, 868.5867, 868.5867, 871.0599, 877.0814, 882.5994, 882.5994, 887.0316, 909.0287, 951.6699, 960.9595, 1017.7114, 1019.5801, 1019.7258, 1033.7395, 1036.6012, 1036.6012, 1051.7457, 1051.7457, 1060.1041, 1082.0940, 1098.0653, 1151.7755, 1151.7755, 1165.7815, 1165.7815, 1194.6759, 1194.6759, 1266.6686, 1277.7600, 1334.9314, 1334.9314, 1475.8114, 1487.8091, 1618.1177, 1618.1177, 1732.1512, 1784.0413, 1902.3138, 1994.0560, 2221.2212, 2284.2476

8. [gi|488818860](#) Mass: 9345 Score: 45 Expect: 1.1e+003 Matches: 6  
hypothetical protein [Phaeosporillum molischianum]

| Observed  | Mr(expt)  | Mr(calc)  | ppm    | Start | End | Miss | Ions | Peptide                |
|-----------|-----------|-----------|--------|-------|-----|------|------|------------------------|
| 1019.5801 | 1018.5728 | 1018.4985 | 73.0   | 47    | -   | 54   | 0    | --- R.ENFIHGFR.H       |
| 1036.6012 | 1035.5939 | 1035.6441 | -48.44 | 4     | -   | 13   | 0    | --- K.LPTVVVGPVR.K     |
| 1036.6012 | 1035.5939 | 1035.6441 | -48.44 | 4     | -   | 13   | 0    | --- K.LPTVVVGPVR.K     |
| 1266.6686 | 1265.6613 | 1265.6326 | 22.7   | 62    | -   | 72   | 0    | --- K.VLTPTSQSEFK.R    |
| 1277.7600 | 1276.7527 | 1276.8231 | -55.12 | 2     | -   | 13   | 1    | --- M.IKLPTVVVGPVR.K   |
| 1784.0413 | 1783.0340 | 1782.8988 | 75.9   | 47    | -   | 61   | 1    | --- R.ENFIHGFRHPTMAK.V |

**No match to:** 842.5546, 848.5696, 850.5803, 853.5549, 853.5549, 855.0955, 864.5864, 868.5867, 868.5867, 871.0599, 877.0814, 882.5994, 882.5994, 887.0316, 909.0287, 951.6699, 960.9595, 1017.7114, 1019.5801, 1019.7258, 1033.7395, 1051.7457, 1051.7457, 1060.1041, 1082.0940, 1098.0653, 1151.7755, 1151.7755, 1165.7815, 1165.7815, 1194.6759, 1194.6759, 1266.6686, 1277.7600, 1334.9314, 1334.9314, 1448.9645, 1448.9645, 1475.8114, 1487.8091, 1595.9777, 1595.9777, 1618.1177, 1618.1177, 1633.9124, 1732.1512, 1902.3138, 1994.0560, 2221.2212, 2284.2476

9. [gi|446609084](#) Mass: 31602 Score: 45 Expect: 1.1e+003 Matches: 7  
prephenate dehydratase [Streptococcus oralis]

| Observed  | Mr(expt)  | Mr(calc)  | ppm  | Start | End | Miss | Ions | Peptide                             |
|-----------|-----------|-----------|------|-------|-----|------|------|-------------------------------------|
| 842.5546  | 841.5473  | 841.5021  | 53.7 | 223   | -   | 229  | 0    | --- K.IESRPLK.T                     |
| 1036.6012 | 1035.5939 | 1035.5787 | 14.7 | 1     | -   | 9    | 1    | --- -.MKIAYLGPK.G + Oxidation (M)   |
| 1036.6012 | 1035.5939 | 1035.5787 | 14.7 | 1     | -   | 9    | 1    | 3 --- -.MKIAYLGPK.G + Oxidation (M) |
| 1266.6686 | 1265.6613 | 1265.5750 | 68.2 | 111   | -   | 120  | 0    | --- K.FIDMHYPEAK.I + Oxidation (M)  |
| 1296.7419 | 1295.7346 | 1295.6986 | 27.8 | 98    | -   | 109  | 0    | --- K.IFSPHQAQGG.K                  |
| 1784.0413 | 1783.0340 | 1782.8941 | 78.5 | 133   | -   | 148  | 0    | --- R.FISEHPDQPYAAIAPK.S            |
| 2284.2476 | 2283.2403 | 2283.2164 | 10.5 | 3     | -   | 23   | 1    | --- K.IAYLGPKGSFHHVVTAFPK.E         |

**No match to:** 842.5546, 848.5696, 850.5803, 853.5549, 853.5549, 855.0955, 864.5864, 868.5867, 868.5867, 871.0599, 877.0814, 882.5994, 882.5994, 887.0316, 909.0287, 951.6699, 960.9595, 1017.7114, 1019.5801, 1019.7258, 1033.7395, 1051.7457, 1051.7457, 1060.1041, 1082.0940, 1098.0653, 1151.7755, 1151.7755, 1165.7815, 1165.7815, 1194.6759, 1194.6759, 1277.7600, 1334.9314, 1334.9314, 1448.9645, 1448.9645, 1475.8114, 1487.8091, 1595.9777, 1595.9777, 1618.1177, 1618.1177, 1633.9124, 1732.1512, 1902.3138, 1994.0560, 2221.2212

10. [gi|518026209](#) Mass: 30111 Score: 44 Expect: 1.3e+003 Matches: 7  
serine acetyltransferase [Afipia birgiae]

| Observed  | Mr(expt)  | Mr(calc)  | ppm    | Start | End | Miss | Ions | Peptide                       |
|-----------|-----------|-----------|--------|-------|-----|------|------|-------------------------------|
| 1036.6012 | 1035.5939 | 1035.5362 | 55.7   | 116   | -   | 124  | 0    | --- K.GFHAIQHR.L              |
| 1036.6012 | 1035.5939 | 1035.5362 | 55.7   | 116   | -   | 124  | 0    | --- K.GFHAIQHR.L              |
| 1266.6686 | 1265.6613 | 1265.6418 | 15.5   | 125   | -   | 134  | 0    | --- R.LAHWLYHNGR.R            |
| 1296.7419 | 1295.7346 | 1295.6834 | 39.6   | 62    | -   | 73   | 0    | --- R.LDHSALSGDLIR.Q          |
| 1994.0560 | 1993.0487 | 1992.9177 | 65.7   | 74    | -   | 91   | 0    | --- R.QAYNDATIEAEPDLGNAFR.A   |
| 2221.2212 | 2220.2139 | 2220.2478 | -15.26 | 229   | -   | 251  | 1    | --- R.VASGSVVLKDVNNVTAGVPAK.I |
| 2284.2476 | 2283.2403 | 2283.1674 | 31.9   | 116   | -   | 134  | 1    | --- K.GFHAIQHR.LAHWLYHNGR.R   |

**No match to:** 842.5546, 848.5696, 850.5803, 853.5549, 853.5549, 855.0955, 864.5864, 868.5867, 868.5867, 871.0599, 877.0814, 882.5994, 882.5994, 887.0316, 909.0287, 951.6699, 960.9595, 1017.7114, 1019.5801, 1019.7258, 1033.7395, 1051.7457, 1051.7457, 1060.1041, 1082.0940, 1098.0653, 1151.7755, 1151.7755, 1165.7815, 1165.7815, 1194.6759, 1194.6759, 1277.7600, 1334.9314, 1334.9314, 1448.9645, 1448.9645, 1475.8114, 1487.8091, 1595.9777, 1595.9777, 1618.1177, 1618.1177, 1633.9124, 1732.1512, 1902.3138, 1994.0560, 2221.2212

11. [gi|24496448](#) Mass: 66533 Score: 44 Expect: 1.3e+003 Matches: 9  
immunoglobulin M heavy chain secretory form [Bos taurus]

| Observed  | Mr(expt)  | Mr(calc)  | ppm  | Start | End | Miss | Ions | Peptide                 |
|-----------|-----------|-----------|------|-------|-----|------|------|-------------------------|
| 1036.6012 | 1035.5939 | 1035.5502 | 42.3 | 292   | -   | 299  | 0    | --- K.QISLSWFR.D        |
| 1036.6012 | 1035.5939 | 1035.5502 | 42.3 | 292   | -   | 299  | 0    | --- K.QISLSWFR.D        |
| 1194.6759 | 1193.6686 | 1193.6233 | 37.9 | 198   | -   | 206  | 0    | --- R.FWTFPEVLR.D       |
| 1194.6759 | 1193.6686 | 1193.6233 | 37.9 | 198   | -   | 206  | 0    | 18 --- R.FWTFPEVLR.D    |
| 1266.6686 | 1265.6613 | 1265.6040 | 45.3 | 413   | -   | 422  | 0    | --- K.ALEHTYFER.H       |
| 1595.9777 | 1594.9704 | 1594.9083 | 38.9 | 254   | -   | 268  | 0    | --- K.AEVLSPVVSFVFPVR.N |
| 1595.9777 | 1594.9704 | 1594.9083 | 39.0 | 254   | -   | 268  | 0    | --- K.AEVLSPVVSFVFPVR.N |
| 1633.9124 | 1632.9051 | 1632.8413 | 39.1 | 501   | -   | 514  | 0    | --- K.GFAPADVFVQWLQR.G  |
| 1784.0413 | 1783.0340 | 1782.9702 | 35.8 | 469   | -   | 484  | 0    | --- K.DVAMKPPSVYLLPPTRE |

**No match to:** 842.5546, 848.5696, 850.5803, 853.5549, 853.5549, 855.0955, 864.5864, 868.5867, 868.5867, 871.0599, 877.0814, 882.5994, 882.5994, 887.0316, 909.0287, 951.6699, 960.9595, 1017.7114, 1019.5801, 1019.7258, 1033.7395, 1051.7457, 1051.7457, 1060.1041, 1082.0940, 1098.0653, 1151.7755, 1151.7755, 1165.7815, 1165.7815, 1194.6759, 1194.6759, 1277.7600, 1334.9314, 1334.9314, 1448.9645, 1448.9645, 1475.8114, 1487.8091, 1618.1177, 1618.1177, 1732.1512, 1902.3138, 1994.0560, 2221.2212, 2284.2476

12. [gi|547755423](#) Mass: 19340 Score: 44 Expect: 1.4e+003 Matches: 8  
ribosome maturation factor RimM [Clostridium sp. CAG:221]

| Observed  | Mr(expt)  | Mr(calc)  | ppm    | Start | End | Miss | Ions | Peptide                           |
|-----------|-----------|-----------|--------|-------|-----|------|------|-----------------------------------|
| 853.5549  | 852.5476  | 852.4817  | 77.3   | 10    | -   | 17   | 0    | --- K.IANTHGLK.G                  |
| 853.5549  | 852.5477  | 852.4817  | 77.3   | 10    | -   | 17   | 0    | --- K.IANTHGLK.G                  |
| 1019.5801 | 1018.5728 | 1018.5845 | -11.45 | 1     | -   | 9    | 1    | --- -.MSQLLKVGK.I + Oxidation (M) |
| 1266.6686 | 1265.6613 | 1265.7092 | -37.80 | 10    | -   | 21   | 1    | --- K.IANTHGLKGEVK.V              |
| 1277.7600 | 1276.7527 | 1276.8482 | -74.78 | 130   | -   | 140  | 1    | --- R.KPKELLIPVLK.S               |
| 1296.7419 | 1295.7346 | 1295.6544 | 61.9   | 44    | -   | 54   | 1    | --- K.TISVEGCKFQK.D               |
| 1595.9777 | 1594.9704 | 1594.8355 | 84.6   | 31    | -   | 43   | 1    | --- K.RFNDLEYVIEGK.T              |
| 1595.9777 | 1594.9704 | 1594.8355 | 84.6   | 31    | -   | 43   | 1    | --- K.RFNDLEYVIEGK.T              |

**No match to:** 842.5546, 848.5696, 850.5803, 855.0955, 864.5864, 868.5867, 868.5867, 871.0599, 877.0814, 882.5994, 882.5994, 887.0316, 909.0287, 951.6699, 960.9595, 1017.7114, 1019.7258, 1033.7395, 1036.6012, 1036.6012, 1051.7457, 1051.7457, 1060.1041, 1082.0940, 1098.0653, 1151.7755, 1151.7755, 1165.7815, 1165.7815, 1194.6759, 1194.6759, 1277.7600, 1296.7419, 1334.9314, 1334.9314, 1448.9645, 1448.9645, 1475.8114, 1487.8091, 1618.1177, 1618.1177, 1633.9124, 1732.1512, 1784.0413, 1902.3138, 1994.0560, 2221.2212, 2284.2476

13. [gi|492049521](#) Mass: 6980 Score: 43 Expect: 1.5e+003 Matches: 6  
hypothetical protein [Pseudomonas amygdali]

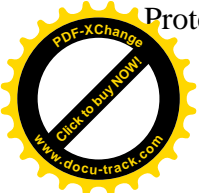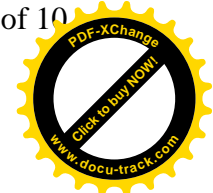

| Observed  | Mr(expt)  | Mr(calc)  | ppm  | Start | End | Miss | Ions | Peptide                                    |
|-----------|-----------|-----------|------|-------|-----|------|------|--------------------------------------------|
| 1036.6012 | 1035.5939 | 1035.5899 | 3.88 | 8     | 16  | 0    | ---  | R.QVMLHIPAK.A                              |
| 1036.6012 | 1035.5939 | 1035.5899 | 3.88 | 8     | 16  | 0    | ---  | R.QVMLHIPAK.A                              |
| 1618.1177 | 1617.1104 | 1616.9548 | 96.2 | 8     | 21  | 1    | ---  | R.QVMLHIPAKALKPR.A + Oxidation (M)         |
| 1618.1177 | 1617.1104 | 1616.9548 | 96.2 | 8     | 21  | 1    | ---  | R.QVMLHIPAKALKPR.A + Oxidation (M)         |
| 1784.0413 | 1783.0340 | 1783.0178 | 9.08 | 2     | 16  | 1    | ---  | M.TILFTRQVMLHIPAK.A + Oxidation (M)        |
| 2221.2212 | 2220.2139 | 2220.1069 | 48.2 | 25    | 46  | 0    | ---  | R.AVNIASVGGEQVMGNAVPAQHR.G + Oxidation (M) |

**No match to:** 842.5546, 848.5696, 850.5803, 853.5549, 853.5549, 855.0955, 864.5864, 868.5867, 868.5867, 871.0599, 877.0814, 882.5994, 882.5994, 887.0316, 909.0287, 951.6699, 960.9595, 1017.7114, 1019.5801, 1019.7258, 1033.7395, 1051.7457, 1051.7457, 1060.1041, 1082.0940, 1098.0653, 1151.7755, 1151.7755, 1165.7815, 1165.7815, 1194.6759, 1194.6759, 1266.6686, 1277.7600, 1296.7419, 1334.9314, 1334.9314, 1448.9645, 1448.9645, 1475.8114, 1487.8091, 1595.9777, 1595.9777, 1633.9124, 1732.1512, 1902.3138, 1994.0560, 2284.2476

14. [gi|488127006](#) Mass: 5046 Score: 43 Expect: 1.6e+003 Matches: 6

hypothetical protein, partial [Helicobacter pylori]

| Observed  | Mr(expt)  | Mr(calc)  | ppm    | Start | End | Miss | Ions | Peptide                     |
|-----------|-----------|-----------|--------|-------|-----|------|------|-----------------------------|
| 853.5549  | 852.5476  | 852.4779  | 81.8   | 34    | 40  | 0    | ---  | R.MVIFISK.A + Oxidation (M) |
| 853.5549  | 852.5477  | 852.4779  | 81.8   | 34    | 40  | 0    | ---  | R.MVIFISK.A + Oxidation (M) |
| 864.5864  | 863.5791  | 863.5116  | 78.2   | 19    | 25  | 1    | ---  | K.EALKYLK.T                 |
| 1165.7815 | 1164.7742 | 1164.6689 | 90.4   | 31    | 40  | 1    | ---  | K.ATRMVIFISK.A              |
| 1165.7815 | 1164.7742 | 1164.6689 | 90.4   | 31    | 40  | 1    | ---  | K.ATRMVIFISK.A              |
| 1266.6686 | 1265.6613 | 1265.6876 | -20.75 | 34    | 44  | 1    | ---  | R.MVIFISKACVV.-             |

**No match to:** 842.5546, 848.5696, 850.5803, 855.0955, 868.5867, 868.5867, 871.0599, 877.0814, 882.5994, 882.5994, 887.0316, 909.0287, 951.6699, 960.9595, 1017.7114, 1019.5801, 1019.7258, 1033.7395, 1036.6012, 1036.6012, 1051.7457, 1051.7457, 1060.1041, 1082.0940, 1098.0653, 1151.7755, 1151.7755, 1194.6759, 1194.6759, 1277.7600, 1296.7419, 1334.9314, 1334.9314, 1448.9645, 1448.9645, 1475.8114, 1487.8091, 1595.9777, 1595.9777, 1618.1177, 1618.1177, 1633.9124, 1732.1512, 1784.0413, 1902.3138, 1994.0560, 2221.2212, 2284.2476

15. [gi|68535459](#) Mass: 8368 Score: 43 Expect: 1.7e+003 Matches: 5

hypothetical protein jk0392 [Corynebacterium jeikeium K411]

| Observed  | Mr(expt)  | Mr(calc)  | ppm  | Start | End | Miss | Ions | Peptide               |
|-----------|-----------|-----------|------|-------|-----|------|------|-----------------------|
| 1194.6759 | 1193.6686 | 1193.6081 | 50.7 | 62    | 71  | 1    | ---  | K.AFVEKNPDFK.E        |
| 1194.6759 | 1193.6686 | 1193.6081 | 50.7 | 62    | 71  | 1    | ---  | K.AFVEKNPDFK.E        |
| 1296.7419 | 1295.7346 | 1295.6544 | 62.0 | 55    | 66  | 1    | ---  | K.ASCSAVKAFVEK.N      |
| 1475.8114 | 1474.8041 | 1474.6841 | 81.4 | 19    | 30  | 0    | ---  | R.DFNHTVVDPEFR.G      |
| 1784.0413 | 1783.0340 | 1783.0091 | 14.0 | 31    | 47  | 0    | ---  | R.QGGLSKPLISEALLETK.E |

**No match to:** 842.5546, 848.5696, 850.5803, 853.5549, 853.5549, 855.0955, 864.5864, 868.5867, 868.5867, 871.0599, 877.0814, 882.5994, 882.5994, 887.0316, 909.0287, 951.6699, 960.9595, 1017.7114, 1019.5801, 1019.7258, 1033.7395, 1036.6012, 1036.6012, 1051.7457, 1051.7457, 1060.1041, 1082.0940, 1098.0653, 1151.7755, 1151.7755, 1194.6759, 1194.6759, 1277.7600, 1296.7419, 1334.9314, 1334.9314, 1448.9645, 1448.9645, 1475.8114, 1487.8091, 1595.9777, 1595.9777, 1618.1177, 1618.1177, 1633.9124, 1732.1512, 1784.0413, 1902.3138, 1994.0560, 2221.2212, 2284.2476

16. [gi|3834667](#) Mass: 48810 Score: 42 Expect: 2.2e+003 Matches: 7

immunoglobulin heavy chain constant region [Bos taurus]

| Observed  | Mr(expt)  | Mr(calc)  | ppm  | Start | End | Miss | Ions | Peptide              |
|-----------|-----------|-----------|------|-------|-----|------|------|----------------------|
| 1036.6012 | 1035.5939 | 1035.5502 | 42.3 | 151   | 158 | 0    | ---  | K.QISLSWFR.D         |
| 1036.6012 | 1035.5939 | 1035.5502 | 42.3 | 151   | 158 | 0    | ---  | K.QISLSWFR.D         |
| 1194.6759 | 1193.6686 | 1193.6233 | 37.9 | 54    | 62  | 0    | ---  | R.FWTFPEVLR.D        |
| 1194.6759 | 1193.6686 | 1193.6233 | 37.9 | 54    | 62  | 0    | 18   | R.FWTFPEVLR.D        |
| 1266.6686 | 1265.6613 | 1265.6040 | 45.3 | 272   | 281 | 0    | ---  | K.ALEHTYFPER.H       |
| 1633.9124 | 1632.9051 | 1632.8413 | 39.1 | 360   | 373 | 0    | ---  | K.GFAPADVFVQWLQR.G   |
| 1784.0413 | 1783.0340 | 1782.9702 | 35.8 | 328   | 343 | 0    | ---  | K.DVAMKPPSVYLLPPTR.E |

**No match to:** 842.5546, 848.5696, 850.5803, 853.5549, 853.5549, 855.0955, 864.5864, 868.5867, 868.5867, 871.0599, 877.0814, 882.5994, 882.5994, 887.0316, 909.0287, 951.6699, 960.9595, 1017.7114, 1019.5801, 1019.7258, 1033.7395, 1051.7457, 1051.7457, 1060.1041, 1082.0940, 1098.0653, 1151.7755, 1151.7755, 1165.7815, 1165.7815, 1194.6759, 1194.6759, 1266.6686, 1277.7600, 1296.7419, 1334.9314, 1334.9314, 1448.9645, 1448.9645, 1475.8114, 1487.8091, 1595.9777, 1595.9777, 1618.1177, 1618.1177, 1732.1512, 1902.3138, 1994.0560, 2221.2212, 2284.2476

17. [gi|547238705](#) Mass: 13800 Score: 42 Expect: 2.4e+003 Matches: 7

ribosomal protein S13 [Firmicutes bacterium CAG:884]

| Observed  | Mr(expt)  | Mr(calc)  | ppm    | Start | End | Miss | Ions | Peptide                      |
|-----------|-----------|-----------|--------|-------|-----|------|------|------------------------------|
| 882.5994  | 881.5921  | 881.5195  | 82.3   | 94    | 101 | 1    | ---  | K.GLPVRGQR.T                 |
| 882.5994  | 881.5922  | 881.5195  | 82.4   | 94    | 101 | 1    | ---  | K.GLPVRGQR.T                 |
| 1019.5801 | 1018.5728 | 1018.5229 | 49.0   | 71    | 78  | 1    | ---  | R.REVNMNIK.T + Oxidation (M) |
| 1475.8114 | 1474.8041 | 1474.7350 | 46.8   | 81    | 92  | 1    | ---  | K.MEINSYQGIRHK.K             |
| 1595.9777 | 1594.9704 | 1594.9195 | 31.9   | 14    | 27  | 1    | ---  | K.RTVIALTYIYGIGR.S           |
| 1595.9777 | 1594.9704 | 1594.9195 | 31.9   | 14    | 27  | 1    | ---  | K.RTVIALTYIYGIGR.S           |
| 2284.2476 | 2283.2403 | 2283.2661 | -11.27 | 15    | 35  | 1    | ---  | R.TVIALTYIYGIGRSLAATICK.D    |

**No match to:** 842.5546, 848.5696, 850.5803, 853.5549, 853.5549, 855.0955, 864.5864, 868.5867, 868.5867, 871.0599, 877.0814, 887.0316, 909.0287, 951.6699, 960.9595, 1017.7114, 1019.5801, 1019.7258, 1033.7395, 1036.6012, 1036.6012, 1051.7457, 1051.7457, 1060.1041, 1082.0940, 1098.0653, 1151.7755, 1151.7755, 1165.7815, 1165.7815, 1194.6759, 1194.6759, 1266.6686, 1277.7600, 1296.7419, 1334.9314, 1334.9314, 1448.9645, 1448.9645, 1475.8114, 1487.8091, 1595.9777, 1595.9777, 1618.1177, 1618.1177, 1633.9124, 1732.1512, 1784.0413, 1902.3138, 1994.0560, 2221.2212

18. [gi|345564418](#) Mass: 28894 Score: 41 Expect: 2.7e+003 Matches: 4

hypothetical protein AOL\_s00083g474 [Arthrotrichy oligospora ATCC 24927]

| Observed  | Mr(expt)  | Mr(calc)  | ppm  | Start | End | Miss | Ions | Peptide                                    |
|-----------|-----------|-----------|------|-------|-----|------|------|--------------------------------------------|
| 1194.6759 | 1193.6686 | 1193.6445 | 20.2 | 176   | 185 | 0    | ---  | R.FNVSVQYLKPK.D                            |
| 1194.6759 | 1193.6686 | 1193.6233 | 38.0 | 43    | 51  | 0    | 18   | R.LPWYLSPLYR.G                             |
| 1633.9124 | 1632.9051 | 1632.7678 | 84.1 | 26    | 38  | 1    | ---  | K.EITNDRHFSMLR.Y                           |
| 2221.2212 | 2220.2139 | 2220.0805 | 60.1 | 4     | 25  | 1    | ---  | R.QRPTSSSSPAVASNGGVDTKMK.E + Oxidation (M) |

**No match to:** 842.5546, 848.5696, 850.5803, 853.5549, 853.5549, 855.0955, 864.5864, 868.5867, 868.5867, 871.0599, 877.0814, 882.5994, 882.5994, 887.0316, 909.0287, 951.6699, 960.9595, 1017.7114, 1019.5801, 1019.7258, 1033.7395, 1036.6012, 1036.6012, 1051.7457, 1051.7457, 1060.1041, 1082.0940, 1098.0653, 1151.7755, 1151.7755, 1165.7815, 1165.7815, 1194.6759, 1194.6759, 1266.6686, 1277.7600, 1296.7419, 1334.9314, 1334.9314, 1448.9645, 1448.9645, 1475.8114, 1487.8091, 1595.9777, 1595.9777, 1618.1177, 1618.1177, 1633.9124, 1732.1512, 1784.0413, 1902.3138, 1994.0560, 2284.2476

19. [gi|517947175](#) Mass: 20170 Score: 41 Expect: 2.7e+003 Matches: 7

hypothetical protein [Anaerococcus sp. PH9]

| Observed  | Mr(expt)  | Mr(calc)  | ppm  | Start | End | Miss | Ions | Peptide                        |
|-----------|-----------|-----------|------|-------|-----|------|------|--------------------------------|
| 1036.6012 | 1035.5939 | 1035.4985 | 92.1 | 12    | 21  | 0    | ---  | R.DSGNANFALK.L                 |
| 1036.6012 | 1035.5939 | 1035.4985 | 92.1 | 12    | 21  | 0    | ---  | R.DSGNANFALK.L                 |
| 1194.6759 | 1193.6686 | 1193.6153 | 44.7 | 22    | 31  | 1    | ---  | K.LVGTQRYSDR.E                 |
| 1194.6759 | 1193.6686 | 1193.6153 | 44.7 | 22    | 31  | 1    | ---  | K.LVGTQRYSDR.E                 |
| 1266.6686 | 1265.6613 | 1265.6438 | 13.9 | 1     | 11  | 0    | ---  | -MDLLQAVAYAR.D + Oxidation (M) |
| 1487.8091 | 1486.8018 | 1486.6875 | 76.9 | 91    | 103 | 0    | ---  | R.GCYVISYDAGNLR.Y              |

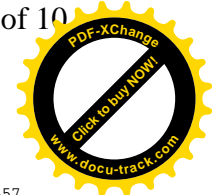

2284.2476 2283.2403 2283.1317 47.6 1 - 21 1 --- -.MDLLQAVAYARDSGNANFALK.L + Oxidation (M)

**No match to:** 842.5546, 848.5696, 850.5803, 853.5549, 853.5549, 855.0955, 864.5864, 868.5867, 868.5867, 871.0599, 877.0814, 882.5994, 882.5994, 887.0316, 909.0287, 951.6699, 960.9595, 1017.7114, 1019.5801, 1019.7258, 1033.7395, 1051.7457, 1051.7457, 1060.1041, 1082.0940, 1098.0653, 1151.7755, 1151.7755, 1165.7815, 1165.7815, 1277.7600, 1296.7419, 1334.9314, 1334.9314, 1448.9645, 1448.9645, 1475.8114, 1595.9777, 1595.9777, 1618.1177, 1618.1177, 1633.9124, 1732.1512, 1784.0413, 1902.3138, 1994.0560, 2221.2212

20. [gi|522808524](#) Mass: 25797 Score: 41 Expect: 2.7e+003 Matches: 8

hypothetical protein [Mycobacterium marinum]

| Observed  | Mr(expt)  | Mr(calc)  | ppm  | Start | End   | Miss | Ions | Peptide                            |
|-----------|-----------|-----------|------|-------|-------|------|------|------------------------------------|
| 951.6699  | 950.6626  | 950.5774  | 89.7 | 195   | - 202 | 1    | ---  | R.QLRKPGPR.Q                       |
| 1151.7755 | 1150.7682 | 1150.7074 | 52.9 | 31    | - 41  | 0    | ---  | R.SVPLSLLVAPR.L                    |
| 1151.7755 | 1150.7682 | 1150.7074 | 52.9 | 31    | - 41  | 0    | ---  | R.SVPLSLLVAPR.L                    |
| 1266.6686 | 1265.6613 | 1265.6153 | 36.4 | 51    | - 61  | 0    | ---  | R.DPHTVDWLAGR.R                    |
| 1595.9777 | 1594.9704 | 1594.8613 | 68.4 | 97    | - 110 | 1    | ---  | R.VMAADRVLEHLGLR.T + Oxidation (M) |
| 1595.9777 | 1594.9704 | 1594.8613 | 68.4 | 97    | - 110 | 1    | ---  | R.VMAADRVLEHLGLR.T + Oxidation (M) |
| 1784.0413 | 1783.0340 | 1783.0145 | 11.0 | 111   | - 127 | 1    | ---  | R.TRLFAAPGWVSPGVVK.A               |
| 2284.2476 | 2283.2403 | 2283.2124 | 12.2 | 128   | - 148 | 1    | ---  | K.ALPGNGFRLLADYHGISDLVR.K          |

**No match to:** 842.5546, 848.5696, 850.5803, 853.5549, 853.5549, 855.0955, 864.5864, 868.5867, 868.5867, 871.0599, 877.0814, 882.5994, 882.5994, 887.0316, 909.0287, 960.9595, 1017.7114, 1019.5801, 1019.7258, 1033.7395, 1036.6012, 1036.6012, 1051.7457, 1051.7457, 1060.1041, 1082.0940, 1098.0653, 1165.7815, 1165.7815, 1194.6759, 1194.6759, 1277.7600, 1296.7419, 1334.9314, 1334.9314, 1448.9645, 1448.9645, 1475.8114, 1487.8091, 1618.1177, 1618.1177, 1633.9124, 1732.1512, 1902.3138, 1994.0560, 2221.2212

21. [gi|550715204](#) Mass: 37257 Score: 41 Expect: 2.9e+003 Matches: 7

transcriptional activator FtrA [Enterobacter sp. MGH 8]

| Observed  | Mr(expt)  | Mr(calc)  | ppm  | Start | End   | Miss | Ions | Peptide                  |
|-----------|-----------|-----------|------|-------|-------|------|------|--------------------------|
| 1165.7815 | 1164.7742 | 1164.6880 | 74.0 | 273   | - 281 | 1    | ---  | R.WLLTARLHR.A            |
| 1165.7815 | 1164.7742 | 1164.6880 | 74.1 | 273   | - 281 | 1    | ---  | R.WLLTARLHR.A            |
| 1194.6759 | 1193.6686 | 1193.6339 | 29.1 | 251   | - 260 | 1    | ---  | R.VGMSQRTFLR.R           |
| 1194.6759 | 1193.6686 | 1193.6339 | 29.1 | 251   | - 260 | 1    | 11   | R.VGMSQRTFLR.R           |
| 1475.8114 | 1474.8041 | 1474.7681 | 24.4 | 136   | - 147 | 1    | ---  | K.ATTHWRYTQALK.T         |
| 1784.0413 | 1783.0340 | 1782.9337 | 56.3 | 207   | - 222 | 0    | ---  | R.DGSQTQQLSRPVAQLR.E     |
| 2284.2476 | 2283.2403 | 2283.1680 | 31.7 | 207   | - 226 | 1    | ---  | R.DGSQTQQLSRPVAQLRESQR.L |

**No match to:** 842.5546, 848.5696, 850.5803, 853.5549, 853.5549, 855.0955, 864.5864, 868.5867, 868.5867, 871.0599, 877.0814, 882.5994, 882.5994, 887.0316, 909.0287, 951.6699, 960.9595, 1017.7114, 1019.5801, 1019.7258, 1033.7395, 1036.6012, 1036.6012, 1051.7457, 1051.7457, 1060.1041, 1082.0940, 1098.0653, 1151.7755, 1151.7755, 1266.6686, 1277.7600, 1296.7419, 1334.9314, 1334.9314, 1448.9645, 1448.9645, 1487.8091, 1595.9777, 1595.9777, 1618.1177, 1618.1177, 1633.9124, 1732.1512, 1902.3138, 1994.0560, 2221.2212

22. [gi|516231730](#) Mass: 9834 Score: 41 Expect: 2.9e+003 Matches: 6

hypothetical protein [Vibrio sp. 71211]

| Observed  | Mr(expt)  | Mr(calc)  | ppm   | Start | End  | Miss | Ions | Peptide                               |
|-----------|-----------|-----------|-------|-------|------|------|------|---------------------------------------|
| 853.5549  | 852.5476  | 852.5109  | 43.0  | 5     | - 11 | 0    | ---  | R.LFFIVSK.T                           |
| 853.5549  | 852.5477  | 852.5109  | 43.1  | 5     | - 11 | 0    | ---  | R.LFFIVSK.T                           |
| 1165.7815 | 1164.7742 | 1164.7019 | 62.1  | 2     | - 11 | 1    | ---  | M.VGRLFFIVSK.T                        |
| 1165.7815 | 1164.7742 | 1164.7019 | 62.1  | 2     | - 11 | 1    | ---  | M.VGRLFFIVSK.T                        |
| 1296.7419 | 1295.7346 | 1295.7424 | -6.00 | 1     | - 11 | 1    | ---  | -.MVGRLLFFIVSK.T                      |
| 1994.0560 | 1993.0487 | 1993.0567 | -4.01 | 67    | - 83 | 1    | ---  | R.LNHTMFSAIIEPIAKHR.- + Oxidation (M) |

**No match to:** 842.5546, 848.5696, 850.5803, 855.0955, 864.5864, 868.5867, 868.5867, 871.0599, 877.0814, 882.5994, 882.5994, 887.0316, 909.0287, 951.6699, 960.9595, 1017.7114, 1019.5801, 1019.7258, 1033.7395, 1036.6012, 1036.6012, 1051.7457, 1051.7457, 1060.1041, 1082.0940, 1098.0653, 1151.7755, 1151.7755, 1194.6759, 1194.6759, 1266.6686, 1277.7600, 1334.9314, 1334.9314, 1448.9645, 1448.9645, 1475.8114, 1487.8091, 1595.9777, 1595.9777, 1618.1177, 1618.1177, 1633.9124, 1732.1512, 1784.0413, 1902.3138, 2221.2212, 2284.2476

23. [gi|517496258](#) Mass: 32907 Score: 40 Expect: 3e+003 Matches: 6

hypothetical protein [Bacteroides gallinarum]

| Observed  | Mr(expt)  | Mr(calc)  | ppm    | Start | End   | Miss | Ions | Peptide                                  |
|-----------|-----------|-----------|--------|-------|-------|------|------|------------------------------------------|
| 842.5546  | 841.5473  | 841.5749  | -32.76 | 289   | - 295 | 1    | ---  | R.LLLLKSR.-                              |
| 1194.6759 | 1193.6686 | 1193.5533 | 96.6   | 52    | - 61  | 0    | ---  | K.GNTKPMMDIR.I + 2 Oxidation (M)         |
| 1194.6759 | 1193.6686 | 1193.5533 | 96.6   | 52    | - 61  | 0    | 11   | K.GNTKPMMDIR.I + 2 Oxidation (M)         |
| 1266.6686 | 1265.6613 | 1265.6299 | 24.8   | 134   | - 145 | 1    | ---  | R.RAGGAGYSCVLR.L                         |
| 1994.0560 | 1993.0487 | 1992.9873 | 30.8   | 52    | - 68  | 1    | ---  | K.GNTKPMMDIRIYEGNVR.A                    |
| 2284.2476 | 2283.2403 | 2283.3065 | -28.97 | 4     | - 24  | 1    | ---  | K.IFLLFVMITLALGAFQSKGK.N + Oxidation (M) |

**No match to:** 848.5696, 850.5803, 853.5549, 853.5549, 855.0955, 864.5864, 868.5867, 868.5867, 871.0599, 877.0814, 882.5994, 882.5994, 887.0316, 909.0287, 951.6699, 960.9595, 1017.7114, 1019.5801, 1019.7258, 1033.7395, 1036.6012, 1036.6012, 1051.7457, 1051.7457, 1060.1041, 1082.0940, 1098.0653, 1151.7755, 1151.7755, 1165.7815, 1165.7815, 1277.7600, 1296.7419, 1334.9314, 1334.9314, 1448.9645, 1448.9645, 1475.8114, 1487.8091, 1595.9777, 1595.9777, 1618.1177, 1618.1177, 1633.9124, 1732.1512, 1784.0413, 1902.3138, 2221.2212

24. [gi|183984872](#) Mass: 25857 Score: 40 Expect: 3.4e+003 Matches: 8

hypothetical protein MMAR\_4904 [Mycobacterium marinum M]

| Observed  | Mr(expt)  | Mr(calc)  | ppm  | Start | End   | Miss | Ions | Peptide                            |
|-----------|-----------|-----------|------|-------|-------|------|------|------------------------------------|
| 951.6699  | 950.6626  | 950.5774  | 89.7 | 195   | - 202 | 1    | ---  | R.QLRKPGPR.Q                       |
| 1151.7755 | 1150.7682 | 1150.7074 | 52.9 | 31    | - 41  | 0    | ---  | R.SVPLSLLVAPR.L                    |
| 1151.7755 | 1150.7682 | 1150.7074 | 52.9 | 31    | - 41  | 0    | ---  | R.SVPLSLLVAPR.L                    |
| 1266.6686 | 1265.6613 | 1265.6153 | 36.4 | 51    | - 61  | 0    | ---  | R.DPHTVDWLAGR.R                    |
| 1595.9777 | 1594.9704 | 1594.8613 | 68.4 | 97    | - 110 | 1    | ---  | R.VMAADRVLEHLGLR.T + Oxidation (M) |
| 1595.9777 | 1594.9704 | 1594.8613 | 68.4 | 97    | - 110 | 1    | ---  | R.VMAADRVLEHLGLR.T + Oxidation (M) |
| 1784.0413 | 1783.0340 | 1783.0145 | 11.0 | 111   | - 127 | 1    | ---  | R.TRLFAAPGWVSPGVVK.A               |
| 2284.2476 | 2283.2403 | 2283.2124 | 12.2 | 128   | - 148 | 1    | ---  | K.ALPGNGFRLLADYHGISDLVR.K          |

**No match to:** 842.5546, 848.5696, 850.5803, 853.5549, 853.5549, 855.0955, 864.5864, 868.5867, 868.5867, 871.0599, 877.0814, 882.5994, 882.5994, 887.0316, 909.0287, 960.9595, 1017.7114, 1019.5801, 1019.7258, 1033.7395, 1036.6012, 1036.6012, 1051.7457, 1051.7457, 1060.1041, 1082.0940, 1098.0653, 1165.7815, 1165.7815, 1194.6759, 1194.6759, 1277.7600, 1296.7419, 1334.9314, 1334.9314, 1448.9645, 1448.9645, 1475.8114, 1487.8091, 1618.1177, 1618.1177, 1633.9124, 1732.1512, 1902.3138, 1994.0560, 2221.2212

25. [gi|443492961](#) Mass: 25831 Score: 40 Expect: 3.4e+003 Matches: 8

putative deacetylase [Mycobacterium liflandii 128FXT]

| Observed  | Mr(expt)  | Mr(calc)  | ppm  | Start | End   | Miss | Ions | Peptide                            |
|-----------|-----------|-----------|------|-------|-------|------|------|------------------------------------|
| 951.6699  | 950.6626  | 950.5774  | 89.7 | 195   | - 202 | 1    | ---  | R.QLRKPGPR.Q                       |
| 1151.7755 | 1150.7682 | 1150.7074 | 52.9 | 31    | - 41  | 0    | ---  | R.SVPLSLLVAPR.L                    |
| 1151.7755 | 1150.7682 | 1150.7074 | 52.9 | 31    | - 41  | 0    | ---  | R.SVPLSLLVAPR.L                    |
| 1266.6686 | 1265.6613 | 1265.6153 | 36.4 | 51    | - 61  | 0    | ---  | R.DPHTVDWLAGR.R                    |
| 1595.9777 | 1594.9704 | 1594.8613 | 68.4 | 97    | - 110 | 1    | ---  | R.VMAADRVLEHLGLR.T + Oxidation (M) |
| 1595.9777 | 1594.9704 | 1594.8613 | 68.4 | 97    | - 110 | 1    | ---  | R.VMAADRVLEHLGLR.T + Oxidation (M) |





1784.0413 1783.0340 1783.0145 11.0 111 - 127 1 --- R.TRLFAAPGWVSPGVVK.A  
2284.2476 2283.2403 2283.2124 12.2 128 - 148 1 --- K.ALPGNGFRLLADYHGISDLVR.K

**No match to:** 842.5546, 848.5696, 850.5803, 853.5549, 853.5549, 855.0955, 864.5864, 868.5867, 868.5867, 871.0599, 877.0814, 882.5994, 882.5994, 887.0316, 909.0287, 960.9595, 1017.7114, 1019.5801, 1019.7258, 1033.7395, 1036.6012, 1036.6012, 1051.7457, 1051.7457, 1060.1041, 1082.0940, 1098.0653, 1165.7815, 1165.7815, 1194.6759, 1194.6759, 1277.7600, 1296.7419, 1334.9314, 1334.9314, 1448.9645, 1448.9645, 1475.8114, 1487.8091, 1618.1177, 1618.1177, 1633.9124, 1732.1512, 1902.3138, 1994.0560, 2221.2212

26. [gi|118616343](#) Mass: 25912 Score: 39 Expect: 3.9e+003 Matches: 8

hypothetical protein MUL\_0502 [Mycobacterium ulcerans Agy99]

| Observed  | Mr(expt)  | Mr(calc)  | ppm  | Start | End | Miss | Ions | Peptide                            |
|-----------|-----------|-----------|------|-------|-----|------|------|------------------------------------|
| 951.6699  | 950.6626  | 950.5774  | 89.7 | 195   | -   | 202  | 1    | R.QLRKPGPR.Q                       |
| 1151.7755 | 1150.7682 | 1150.7074 | 52.9 | 31    | -   | 41   | 0    | R.SVPLSLLVAPR.L                    |
| 1151.7755 | 1150.7682 | 1150.7074 | 52.9 | 31    | -   | 41   | 0    | R.SVPLSLLVAPR.L                    |
| 1266.6686 | 1265.6613 | 1265.6153 | 36.4 | 51    | -   | 61   | 0    | R.DPHTVDWLGR.R                     |
| 1595.9777 | 1594.9704 | 1594.8613 | 68.4 | 97    | -   | 110  | 1    | R.VMAADRVLEHLGLR.T + Oxidation (M) |
| 1595.9777 | 1594.9704 | 1594.8613 | 68.4 | 97    | -   | 110  | 1    | R.VMAADRVLEHLGLR.T + Oxidation (M) |
| 1784.0413 | 1783.0340 | 1783.0145 | 11.0 | 111   | -   | 127  | 1    | R.TRLFAAPGWVSPGVVK.A               |
| 2284.2476 | 2283.2403 | 2283.2124 | 12.2 | 128   | -   | 148  | 1    | K.ALPGNGFRLLADYHGISDLVR.K          |

**No match to:** 842.5546, 848.5696, 850.5803, 853.5549, 853.5549, 855.0955, 864.5864, 868.5867, 868.5867, 871.0599, 877.0814, 882.5994, 882.5994, 887.0316, 909.0287, 960.9595, 1017.7114, 1019.5801, 1019.7258, 1033.7395, 1036.6012, 1036.6012, 1051.7457, 1051.7457, 1060.1041, 1082.0940, 1098.0653, 1165.7815, 1165.7815, 1194.6759, 1194.6759, 1277.7600, 1296.7419, 1334.9314, 1334.9314, 1448.9645, 1448.9645, 1475.8114, 1487.8091, 1618.1177, 1618.1177, 1633.9124, 1732.1512, 1902.3138, 1994.0560, 2221.2212

27. [gi|491438800](#) Mass: 10485 Score: 39 Expect: 3.9e+003 Matches: 5

acetyltransferase [Corynebacterium jeikeium]

| Observed  | Mr(expt)  | Mr(calc)  | ppm  | Start | End | Miss | Ions | Peptide              |
|-----------|-----------|-----------|------|-------|-----|------|------|----------------------|
| 1194.6759 | 1193.6686 | 1193.6081 | 50.7 | 81    | -   | 90   | 1    | K.AFVEKNPDPK.E       |
| 1194.6759 | 1193.6686 | 1193.6081 | 50.7 | 81    | -   | 90   | 1    | K.AFVEKNPDPK.E       |
| 1296.7419 | 1295.7346 | 1295.6544 | 62.0 | 74    | -   | 85   | 1    | K.ASCSAVKAFVEK.N     |
| 1475.8114 | 1474.8041 | 1474.6841 | 81.4 | 38    | -   | 49   | 0    | R.DFNHTVVDPEFR.G     |
| 1784.0413 | 1783.0340 | 1783.0091 | 14.0 | 50    | -   | 66   | 0    | R.GQGLSKPLISEALLET.K |

**No match to:** 842.5546, 848.5696, 850.5803, 853.5549, 853.5549, 855.0955, 864.5864, 868.5867, 868.5867, 871.0599, 877.0814, 882.5994, 882.5994, 887.0316, 909.0287, 951.6699, 960.9595, 1017.7114, 1019.5801, 1019.7258, 1033.7395, 1036.6012, 1036.6012, 1051.7457, 1051.7457, 1060.1041, 1082.0940, 1098.0653, 1151.7755, 1151.7755, 1165.7815, 1165.7815, 1266.6686, 1277.7600, 1334.9314, 1334.9314, 1448.9645, 1448.9645, 1487.8091, 1595.9777, 1595.9777, 1618.1177, 1618.1177, 1633.9124, 1732.1512, 1902.3138, 1994.0560, 2221.2212, 2284.2476

28. [gi|491891625](#) Mass: 32908 Score: 39 Expect: 4e+003 Matches: 6

hypothetical protein [Bacteroides stercoris]

| Observed  | Mr(expt)  | Mr(calc)  | ppm    | Start | End | Miss | Ions | Peptide                          |
|-----------|-----------|-----------|--------|-------|-----|------|------|----------------------------------|
| 842.5546  | 841.5473  | 841.5749  | -32.76 | 289   | -   | 295  | 1    | R.LLLLSKR.-                      |
| 1194.6759 | 1193.6686 | 1193.5533 | 96.6   | 52    | -   | 61   | 0    | K.GNTKPMMDIR.I + 2 Oxidation (M) |
| 1194.6759 | 1193.6686 | 1193.5533 | 96.6   | 52    | -   | 61   | 0    | K.GNTKPMMDIR.I + 2 Oxidation (M) |
| 1266.6686 | 1265.6613 | 1265.6299 | 24.8   | 134   | -   | 145  | 1    | R.RAGGAGYSCVLR.L                 |
| 1784.0413 | 1783.0340 | 1782.8901 | 80.7   | 228   | -   | 243  | 1    | K.GDQFQVSLIKYSGGER.Q             |
| 1994.0560 | 1993.0487 | 1992.9873 | 30.8   | 52    | -   | 68   | 1    | K.GNTKPMMDIRIYEGNVR.A            |

**No match to:** 848.5696, 850.5803, 853.5549, 853.5549, 855.0955, 864.5864, 868.5867, 868.5867, 871.0599, 877.0814, 882.5994, 882.5994, 887.0316, 909.0287, 951.6699, 960.9595, 1017.7114, 1019.5801, 1019.7258, 1033.7395, 1036.6012, 1036.6012, 1051.7457, 1051.7457, 1060.1041, 1082.0940, 1098.0653, 1151.7755, 1151.7755, 1165.7815, 1165.7815, 1277.7600, 1296.7419, 1334.9314, 1334.9314, 1448.9645, 1448.9645, 1475.8114, 1487.8091, 1595.9777, 1595.9777, 1618.1177, 1618.1177, 1633.9124, 1732.1512, 1902.3138, 2221.2212, 2284.2476

29. [gi|547517138](#) Mass: 32936 Score: 39 Expect: 4e+003 Matches: 6

uncharacterized protein [Bacteroides stercoris CAG:120]

| Observed  | Mr(expt)  | Mr(calc)  | ppm    | Start | End | Miss | Ions | Peptide                          |
|-----------|-----------|-----------|--------|-------|-----|------|------|----------------------------------|
| 842.5546  | 841.5473  | 841.5749  | -32.76 | 289   | -   | 295  | 1    | R.LLLLSKR.-                      |
| 1194.6759 | 1193.6686 | 1193.5533 | 96.6   | 52    | -   | 61   | 0    | K.GNTKPMMDIR.I + 2 Oxidation (M) |
| 1194.6759 | 1193.6686 | 1193.5533 | 96.6   | 52    | -   | 61   | 0    | K.GNTKPMMDIR.I + 2 Oxidation (M) |
| 1266.6686 | 1265.6613 | 1265.6299 | 24.8   | 134   | -   | 145  | 1    | R.RAGGAGYSCVLR.L                 |
| 1784.0413 | 1783.0340 | 1782.8901 | 80.7   | 228   | -   | 243  | 1    | K.GDQFQVSLIKYSGGER.Q             |
| 1994.0560 | 1993.0487 | 1992.9873 | 30.8   | 52    | -   | 68   | 1    | K.GNTKPMMDIRIYEGNVR.A            |

**No match to:** 848.5696, 850.5803, 853.5549, 853.5549, 855.0955, 864.5864, 868.5867, 868.5867, 871.0599, 877.0814, 882.5994, 882.5994, 887.0316, 909.0287, 951.6699, 960.9595, 1017.7114, 1019.5801, 1019.7258, 1033.7395, 1036.6012, 1036.6012, 1051.7457, 1051.7457, 1060.1041, 1082.0940, 1098.0653, 1151.7755, 1151.7755, 1165.7815, 1165.7815, 1277.7600, 1296.7419, 1334.9314, 1334.9314, 1448.9645, 1448.9645, 1475.8114, 1487.8091, 1595.9777, 1595.9777, 1618.1177, 1618.1177, 1633.9124, 1732.1512, 1902.3138, 2221.2212, 2284.2476

30. [gi|517368986](#) Mass: 14244 Score: 39 Expect: 4.1e+003 Matches: 7

30S ribosomal protein S13 [Streptomyces sp. LaPpAH-108]

| Observed  | Mr(expt)  | Mr(calc)  | ppm  | Start | End | Miss | Ions | Peptide                |
|-----------|-----------|-----------|------|-------|-----|------|------|------------------------|
| 842.5546  | 841.5473  | 841.4658  | 96.9 | 4     | -   | 11   | 0    | R.VSGVDIPR.E           |
| 882.5994  | 881.5921  | 881.5195  | 82.3 | 95    | -   | 102  | 1    | R.GLPVRGQR.T           |
| 882.5994  | 881.5922  | 881.5195  | 82.4 | 95    | -   | 102  | 1    | R.GLPVRGQR.T           |
| 1194.6759 | 1193.6686 | 1193.5863 | 69.0 | 82    | -   | 91   | 0    | K.VEIGCYQGLR.H         |
| 1194.6759 | 1193.6686 | 1193.5863 | 69.0 | 82    | -   | 91   | 0    | K.VEIGCYQGLR.H         |
| 1487.8091 | 1486.8018 | 1486.7463 | 37.3 | 82    | -   | 93   | 1    | K.VEIGCYQGLRHR.R       |
| 2221.2212 | 2220.2139 | 2220.1274 | 39.0 | 47    | -   | 65   | 1    | R.DLSEELVAIREYVDSNIK.T |

**No match to:** 848.5696, 850.5803, 853.5549, 853.5549, 855.0955, 864.5864, 868.5867, 868.5867, 871.0599, 877.0814, 882.5994, 882.5994, 887.0316, 909.0287, 951.6699, 960.9595, 1017.7114, 1019.5801, 1019.7258, 1033.7395, 1036.6012, 1036.6012, 1051.7457, 1051.7457, 1060.1041, 1082.0940, 1098.0653, 1151.7755, 1151.7755, 1165.7815, 1165.7815, 1266.6686, 1277.7600, 1296.7419, 1334.9314, 1334.9314, 1448.9645, 1448.9645, 1475.8114, 1595.9777, 1595.9777, 1618.1177, 1618.1177, 1633.9124, 1732.1512, 1784.0413, 1902.3138, 1994.0560, 2284.2476

31. [gi|516399639](#) Mass: 5928 Score: 39 Expect: 4.1e+003 Matches: 5

integrase [Vibrio vulnificus]

| Observed  | Mr(expt)  | Mr(calc)  | ppm    | Start | End | Miss | Ions | Peptide           |
|-----------|-----------|-----------|--------|-------|-----|------|------|-------------------|
| 1036.6012 | 1035.5939 | 1035.6077 | -13.26 | 6     | -   | 14   | 1    | K.ATLIYARTK.N     |
| 1036.6012 | 1035.5939 | 1035.6077 | -13.26 | 4     | -   | 12   | 1    | R.TKATLIYAR.T     |
| 1277.7600 | 1276.7527 | 1276.6663 | 67.7   | 34    | -   | 44   | 0    | R.YLGVLELDALR.L   |
| 1448.9645 | 1447.9572 | 1447.8623 | 65.5   | 15    | -   | 27   | 1    | K.NIRAVQILLGHSK.V |
| 1448.9645 | 1447.9572 | 1447.8623 | 65.6   | 15    | -   | 27   | 1    | K.NIRAVQILLGHSK.V |

**No match to:** 842.5546, 848.5696, 850.5803, 853.5549, 853.5549, 855.0955, 864.5864, 868.5867, 868.5867, 871.0599, 877.0814, 882.5994, 882.5994, 887.0316, 909.0287, 951.6699, 960.9595, 1017.7114, 1019.5801, 1019.7258, 1033.7395, 1051.7457, 1051.7457, 1060.1041, 1082.0940, 1098.0653, 1151.7755, 1151.7755, 1165.7815, 1165.7815, 1194.6759, 1194.6759, 1266.6686, 1296.7419, 1334.9314, 1334.9314, 1448.9645, 1448.9645, 1475.8114, 1487.8091, 1595.9777, 1595.9777, 1618.1177, 1618.1177, 1633.9124, 1732.1512, 1784.0413, 1902.3138, 1994.0560, 2284.2476

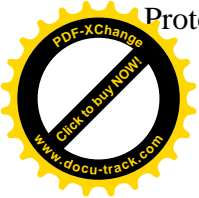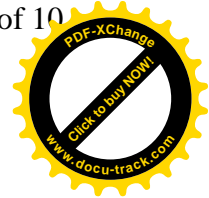

1334.9314, 1334.9314, 1475.8114, 1487.8091, 1595.9777, 1595.9777, 1618.1177, 1618.1177, 1633.9124, 1732.1512, 1784.0413, 1902.3138, 1994.0560, 2221.2212, 2284.2476

32. [gi|479181342](#) Mass: 3438 Score: 39 Expect: 4.2e+003 Matches: 3

Helix-turn-helix domain of resolvase. [Enterococcus sp. 7L76]

| Observed  | Mr(expt)  | Mr(calc)  | ppm    | Start | End | Miss | Ions | Peptide                   |
|-----------|-----------|-----------|--------|-------|-----|------|------|---------------------------|
| 1266.6686 | 1265.6613 | 1265.7707 | -86.40 | 2     | 13  | 1    | ---  | M.LKQGIPVAEIAK.E          |
| 1277.7600 | 1276.7527 | 1276.6775 | 58.9   | 14    | 24  | 0    | ---  | K.ENGISRPITYK.I           |
| 2284.2476 | 2283.2403 | 2283.2586 | -8.02  | 4     | 24  | 1    | ---  | K.QGIPVAEIAKENGISRPITYK.I |

No match to: 842.5546, 848.5696, 850.5803, 853.5549, 853.5549, 855.0955, 864.5864, 868.5867, 868.5867, 871.0599, 877.0814, 882.5994, 882.5994, 887.0316, 909.0287, 951.6699, 960.9595, 1017.7114, 1019.5801, 1019.7258, 1033.7395, 1036.6012, 1036.6012, 1051.7457, 1051.7457, 1060.1041, 1082.0940, 1098.0653, 1151.7755, 1151.7755, 1165.7815, 1165.7815, 1194.6759, 1194.6759, 1296.7419, 1334.9314, 1334.9314, 1448.9645, 1448.9645, 1475.8114, 1487.8091, 1595.9777, 1595.9777, 1618.1177, 1618.1177, 1633.9124, 1732.1512, 1784.0413, 1902.3138, 1994.0560, 2221.2212

33. [gi|491349492](#) Mass: 31061 Score: 39 Expect: 4.3e+003 Matches: 6

hypothetical protein [Gordonia sputi]

| Observed  | Mr(expt)  | Mr(calc)  | ppm  | Start | End | Miss | Ions | Peptide                           |
|-----------|-----------|-----------|------|-------|-----|------|------|-----------------------------------|
| 1036.6012 | 1035.5939 | 1035.5317 | 60.1 | 113   | 120 | 1    | ---  | R.MLRVQMAR.T + 2 Oxidation (M)    |
| 1036.6012 | 1035.5939 | 1035.5317 | 60.1 | 113   | 120 | 1    | ---  | R.MLRVQMAR.T + 2 Oxidation (M)    |
| 1194.6759 | 1193.6686 | 1193.6418 | 22.5 | 243   | 251 | 1    | ---  | R.RIHQLWADR.Q                     |
| 1194.6759 | 1193.6686 | 1193.6227 | 38.5 | 107   | 115 | 1    | 11   | R.EFDLVRMLR.V + Oxidation (M)     |
| 1487.8091 | 1486.8018 | 1486.7449 | 38.3 | 211   | 222 | 1    | ---  | R.EIEEMAELVRLPR.Q + Oxidation (M) |
| 2284.2476 | 2283.2403 | 2283.0994 | 61.7 | 95    | 112 | 1    | ---  | R.TQPYELVSWMDREFDLVR.M            |

No match to: 842.5546, 848.5696, 850.5803, 853.5549, 853.5549, 855.0955, 864.5864, 868.5867, 868.5867, 871.0599, 877.0814, 882.5994, 882.5994, 887.0316, 909.0287, 951.6699, 960.9595, 1017.7114, 1019.5801, 1019.7258, 1033.7395, 1051.7457, 1051.7457, 1060.1041, 1082.0940, 1098.0653, 1151.7755, 1151.7755, 1165.7815, 1165.7815, 1266.6686, 1277.7600, 1296.7419, 1334.9314, 1334.9314, 1448.9645, 1448.9645, 1475.8114, 1595.9777, 1595.9777, 1618.1177, 1618.1177, 1633.9124, 1732.1512, 1784.0413, 1902.3138, 1994.0560, 2221.2212

34. [gi|493388713](#) Mass: 17048 Score: 39 Expect: 4.4e+003 Matches: 5

MarR family transcriptional regulator [Streptomyces tsukubaensis]

| Observed  | Mr(expt)  | Mr(calc)  | ppm    | Start | End | Miss | Ions | Peptide              |
|-----------|-----------|-----------|--------|-------|-----|------|------|----------------------|
| 842.5546  | 841.5473  | 841.5134  | 40.4   | 141   | 148 | 1    | ---  | K.KALGQVAR.A         |
| 848.5696  | 847.5623  | 847.4916  | 83.5   | 24    | 30  | 0    | ---  | R.VLFSVQR.E          |
| 1296.7419 | 1295.7346 | 1295.6946 | 30.9   | 62    | 73  | 1    | ---  | R.ASELARLSGQHK.Q     |
| 1475.8114 | 1474.8041 | 1474.8368 | -22.17 | 48    | 61  | 0    | ---  | R.SGAVLAHLRPEGIR.A   |
| 1994.0560 | 1993.0487 | 1993.0593 | -5.29  | 68    | 85  | 1    | ---  | R.LSGQHKQVVGTLVDDLRL |

No match to: 850.5803, 853.5549, 853.5549, 855.0955, 864.5864, 868.5867, 868.5867, 871.0599, 877.0814, 882.5994, 882.5994, 887.0316, 909.0287, 951.6699, 960.9595, 1017.7114, 1019.5801, 1019.7258, 1033.7395, 1036.6012, 1036.6012, 1051.7457, 1051.7457, 1060.1041, 1082.0940, 1098.0653, 1151.7755, 1151.7755, 1165.7815, 1165.7815, 1194.6759, 1194.6759, 1266.6686, 1277.7600, 1334.9314, 1334.9314, 1448.9645, 1448.9645, 1487.8091, 1595.9777, 1595.9777, 1618.1177, 1618.1177, 1633.9124, 1732.1512, 1784.0413, 1902.3138, 2221.2212, 2284.2476

35. [gi|551036884](#) Mass: 33460 Score: 39 Expect: 4.5e+003 Matches: 8

hypothetical protein [Lachnospiraceae bacterium NK4A136]

| Observed  | Mr(expt)  | Mr(calc)  | ppm    | Start | End | Miss | Ions | Peptide                                 |
|-----------|-----------|-----------|--------|-------|-----|------|------|-----------------------------------------|
| 864.5864  | 863.5791  | 863.5116  | 78.2   | 64    | 70  | 1    | ---  | R.LIKYAEK.M                             |
| 1036.6012 | 1035.5939 | 1035.5197 | 71.7   | 54    | 63  | 0    | ---  | K.TISVTSSGER.L                          |
| 1036.6012 | 1035.5939 | 1035.5197 | 71.7   | 54    | 63  | 0    | ---  | K.TISVTSSGER.L                          |
| 1151.7755 | 1150.7682 | 1150.6598 | 94.2   | 2     | 11  | 0    | ---  | M.TITQLSTFLK.I                          |
| 1151.7755 | 1150.7682 | 1150.6598 | 94.3   | 2     | 11  | 0    | ---  | M.TITQLSTFLK.I                          |
| 1266.6686 | 1265.6613 | 1265.6842 | -18.07 | 105   | 114 | 1    | ---  | R.FPKILMEFNK.D                          |
| 1296.7419 | 1295.7346 | 1295.6543 | 62.0   | 67    | 76  | 1    | ---  | K.YAEKMLQLER.E + Oxidation (M)          |
| 2284.2476 | 2283.2403 | 2283.1093 | 57.4   | 138   | 156 | 1    | ---  | K.GELDMVVTNLPLFEDDRIK.I + Oxidation (M) |

No match to: 842.5546, 848.5696, 850.5803, 853.5549, 853.5549, 855.0955, 868.5867, 868.5867, 871.0599, 877.0814, 882.5994, 882.5994, 887.0316, 909.0287, 951.6699, 960.9595, 1017.7114, 1019.5801, 1019.7258, 1033.7395, 1051.7457, 1051.7457, 1060.1041, 1082.0940, 1098.0653, 1165.7815, 1165.7815, 1194.6759, 1194.6759, 1277.7600, 1334.9314, 1334.9314, 1448.9645, 1448.9645, 1475.8114, 1487.8091, 1595.9777, 1595.9777, 1618.1177, 1618.1177, 1633.9124, 1732.1512, 1784.0413, 1902.3138, 1994.0560, 2221.2212

36. [gi|320333797](#) Mass: 39533 Score: 39 Expect: 4.5e+003 Matches: 7

phospho-2-dehydro-3-deoxyheptonate aldolase [Deinococcus maricopensis DSM 21211]

| Observed  | Mr(expt)  | Mr(calc)  | ppm    | Start | End | Miss | Ions | Peptide                              |
|-----------|-----------|-----------|--------|-------|-----|------|------|--------------------------------------|
| 882.5994  | 881.5921  | 881.5586  | 38.1   | 302   | 309 | 0    | ---  | R.DLLIPLAK.A                         |
| 882.5994  | 881.5922  | 881.5586  | 38.1   | 302   | 309 | 0    | ---  | R.DLLIPLAK.A                         |
| 1019.5801 | 1018.5728 | 1018.5229 | 49.0   | 1     | 8   | 1    | ---  | -.MTRIDDLR.R                         |
| 1194.6759 | 1193.6686 | 1193.5937 | 62.8   | 346   | 355 | 0    | ---  | K.FMAALEPMLR.A + Oxidation (M)       |
| 1194.6759 | 1193.6686 | 1193.5937 | 62.8   | 346   | 355 | 0    | 13   | K.FMAALEPMLR.A + Oxidation (M)       |
| 1266.6686 | 1265.6613 | 1265.7819 | -95.29 | 220   | 231 | 1    | ---  | R.EVGGRAGKPVLLK.R                    |
| 1633.9124 | 1632.9051 | 1632.8480 | 35.0   | 346   | 359 | 1    | ---  | K.FMAALEPMLRAPVR.A + 2 Oxidation (M) |

No match to: 842.5546, 848.5696, 850.5803, 853.5549, 853.5549, 855.0955, 864.5864, 868.5867, 868.5867, 871.0599, 877.0814, 882.5994, 882.5994, 887.0316, 909.0287, 951.6699, 960.9595, 1017.7114, 1019.5801, 1019.7258, 1033.7395, 1036.6012, 1036.6012, 1051.7457, 1051.7457, 1060.1041, 1082.0940, 1098.0653, 1151.7755, 1151.7755, 1165.7815, 1165.7815, 1194.6759, 1194.6759, 1266.6686, 1277.7600, 1296.7419, 1334.9314, 1334.9314, 1448.9645, 1448.9645, 1475.8114, 1487.8091, 1595.9777, 1595.9777, 1618.1177, 1618.1177, 1732.1512, 1784.0413, 1902.3138, 1994.0560, 2221.2212, 2284.2476

37. [gi|409039618](#) Mass: 29114 Score: 38 Expect: 4.8e+003 Matches: 7

hypothetical protein PHACADRAFT\_201965 [Phanerochaete carnosae HHB-10118-sp]

| Observed  | Mr(expt)  | Mr(calc)  | ppm  | Start | End | Miss | Ions | Peptide                     |
|-----------|-----------|-----------|------|-------|-----|------|------|-----------------------------|
| 842.5546  | 841.5473  | 841.5385  | 10.5 | 75    | 81  | 1    | ---  | R.LRLELAK.M                 |
| 848.5696  | 847.5623  | 847.4837  | 92.8 | 77    | 83  | 1    | ---  | R.LELAKMK.S + Oxidation (M) |
| 1036.6012 | 1035.5939 | 1035.5138 | 77.4 | 195   | 202 | 0    | ---  | R.NYFTNHK.E                 |
| 1036.6012 | 1035.5939 | 1035.5138 | 77.4 | 195   | 202 | 0    | ---  | R.NYFTNHK.E                 |
| 1487.8091 | 1486.8018 | 1486.7416 | 40.5 | 203   | 214 | 1    | ---  | K.ESLIKYTPDHER.I            |
| 1784.0413 | 1783.0340 | 1782.9992 | 19.5 | 160   | 175 | 1    | ---  | R.TKVLVHASELFVEVGR.R        |
| 2284.2476 | 2283.2403 | 2283.0388 | 88.3 | 177   | 194 | 0    | ---  | R.SPLFLYMGQHWVTCCTQR.N      |

No match to: 850.5803, 853.5549, 853.5549, 855.0955, 864.5864, 868.5867, 868.5867, 871.0599, 877.0814, 882.5994, 882.5994, 887.0316, 909.0287, 951.6699, 960.9595, 1017.7114, 1019.5801, 1019.7258, 1033.7395, 1036.6012, 1036.6012, 1051.7457, 1051.7457, 1060.1041, 1082.0940, 1098.0653, 1151.7755, 1151.7755, 1165.7815, 1165.7815, 1194.6759, 1194.6759, 1266.6686, 1277.7600, 1296.7419, 1334.9314, 1334.9314, 1448.9645, 1448.9645, 1475.8114, 1487.8091, 1595.9777, 1595.9777, 1618.1177, 1618.1177, 1633.9124, 1732.1512, 1902.3138, 1994.0560, 2221.2212

38. [gi|187251559](#) Mass: 20917 Score: 38 Expect: 4.8e+003 Matches: 6

crossover junction endodeoxyribonuclease RuvC [Elusimicrobium minutum Peil91]

| Observed | Mr(expt) | Mr(calc) | ppm | Start | End | Miss | Ions | Peptide |
|----------|----------|----------|-----|-------|-----|------|------|---------|
|----------|----------|----------|-----|-------|-----|------|------|---------|

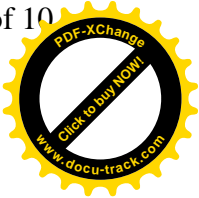

848.5696847.5623847.483792.8132 - 1380 ---R.MVQLTLK.L + Oxidation (M)

1036.60121035.59391035.501988.9116 - 1260 ---K.SVICGSGTAGK.A

1036.60121035.59391035.501988.9116 - 1260 ---K.SVICGSGTAGK.A

1784.04131783.03401782.911268.92 - 180 ---M.DNNALTTVLGIDPGLDR.T

1994.05601993.04871993.015616.645 - 611 ---K.DSALPERLEYIFNEIGK.L

2284.24762283.24032283.106758.562 - 800 ---K.LAEAYKPNHVAMEEMFFLK.R + Oxidation (M)

No match to: 842.5546, 850.5803, 853.5549, 853.5549, 855.0955, 864.5864, 868.5867, 871.0599, 877.0814, 882.5994, 882.5994, 887.0316, 909.0287, 951.6699, 960.9595, 1017.7114, 1019.5801, 1019.7258, 1033.7395, 1051.7457, 1051.7457, 1060.1041, 1082.0940, 1098.0653, 1151.7755, 1151.7755, 1165.7815, 1165.7815, 1194.6759, 1194.6759, 1266.6686, 1277.7600, 1296.7419, 1334.9314, 1334.9314, 1448.9645, 1448.9645, 1475.8114, 1487.8091, 1595.9777, 1595.9777, 1618.1177, 1618.1177, 1633.9124, 1732.1512, 1902.3138, 2221.2212

39. [gi|261260695](#) Mass: 10351 Score: 38 Expect: 5e+003 Matches: 5

Yclm [Bacillus amyloliquefaciens]

ObservedMr(expt)Mr(calc)ppmStartEndMissIonsPeptide

853.5549852.5476852.485772.651 - 570 ---K.LIAAYFR.R

853.5549852.5477852.485772.651 - 570 ---K.LIAAYFR.R

1194.67591193.66861193.629233.020 - 300 ---R.SDLFALLNSSK.A

1194.67591193.66861193.629233.020 - 300 11R.SDLFALLNSSK.A

1994.05601993.04871993.0632-7.271 - 171 ---Y.AAIARELNLDFSIIER.I

No match to: 842.5546, 848.5696, 850.5803, 855.0955, 864.5864, 868.5867, 868.5867, 871.0599, 877.0814, 882.5994, 882.5994, 887.0316, 909.0287, 951.6699, 960.9595, 1017.7114, 1019.5801, 1019.7258, 1033.7395, 1036.6012, 1036.6012, 1051.7457, 1051.7457, 1060.1041, 1082.0940, 1098.0653, 1151.7755, 1151.7755, 1165.7815, 1165.7815, 1194.6759, 1194.6759, 1266.6686, 1277.7600, 1296.7419, 1334.9314, 1334.9314, 1448.9645, 1448.9645, 1475.8114, 1487.8091, 1595.9777, 1595.9777, 1618.1177, 1618.1177, 1633.9124, 1732.1512, 1784.0413, 1902.3138, 2221.2212, 2284.2476

40. [gi|517051098](#) Mass: 27685 Score: 38 Expect: 5.4e+003 Matches: 6

transcriptional regulator [Rhizobium sp. BR816]

ObservedMr(expt)Mr(calc)ppmStartEndMissIonsPeptide

1194.67591193.66861193.553996.198 - 1060 ---R.FPECEPLFR.S

1194.67591193.66861193.553996.198 - 1060 13R.FPECEPLFR.S

1487.80911486.80181486.713959.196 - 1061 ---R.HRFPECEPLFR.S

1595.97771594.97041594.894347.781 - 950 ---R.LALGGVRPVEWATAR.H

1595.97771594.97041594.894347.781 - 950 ---R.LALGGVRPVEWATAR.H

1994.05601993.04871993.0632-7.29198 - 2141 ---K.SYWEIATILGISERTV.R

No match to: 842.5546, 848.5696, 850.5803, 853.5549, 853.5549, 855.0955, 864.5864, 868.5867, 868.5867, 871.0599, 877.0814, 882.5994, 882.5994, 887.0316, 909.0287, 951.6699, 960.9595, 1017.7114, 1019.5801, 1019.7258, 1033.7395, 1036.6012, 1036.6012, 1051.7457, 1051.7457, 1060.1041, 1082.0940, 1098.0653, 1151.7755, 1151.7755, 1165.7815, 1165.7815, 1194.6759, 1194.6759, 1266.6686, 1277.7600, 1296.7419, 1334.9314, 1334.9314, 1448.9645, 1448.9645, 1475.8114, 1618.1177, 1618.1177, 1633.9124, 1732.1512, 1784.0413, 1902.3138, 2221.2212, 2284.2476

41. [gi|444720581](#) Mass: 100358 Score: 38 Expect: 5.5e+003 Matches: 10

General transcription factor II-I [Tupaia chinensis]

ObservedMr(expt)Mr(calc)ppmStartEndMissIonsPeptide

842.5546841.5473841.538510.5410 - 4161 ---R.ILLAKER.I

848.5696847.5623847.516753.8236 - 2430 ---K.AGISFIIK.S

1036.60121035.59391035.513178.0151 - 1591 ---K.MKSTTQANR.M

1036.60121035.59391035.513178.0151 - 1591 ---K.MKSTTQANR.M

1266.66861265.66131265.6768-12.22358 - 3681 ---R.EFNFQAIIKAK.G

1487.80911486.80181486.8395-25.36185 - 1981 ---K.ALKGSTVVPVPYEK.M

1784.04131783.03401782.912768.0810 - 8251 ---K.FGEAIGMGFPVKVPYR.K + Oxidation (M)

1994.05601993.04871992.956146.5252 - 2700 ---K.TEPTEDSGISLEMAAVTVK.E + Oxidation (M)

2221.22122220.21392220.119542.5250 - 2701 ---K.VKTEPTEDSGISLEMAAVTVK.E + Oxidation (M)

2284.24762283.24032283.199817.7645 - 6641 ---K.VPEIEVTVEEAWNAKITDLK.Q

No match to: 850.5803, 853.5549, 853.5549, 855.0955, 864.5864, 868.5867, 868.5867, 871.0599, 877.0814, 882.5994, 882.5994, 887.0316, 909.0287, 951.6699, 960.9595, 1017.7114, 1019.5801, 1019.7258, 1033.7395, 1051.7457, 1051.7457, 1060.1041, 1082.0940, 1098.0653, 1151.7755, 1151.7755, 1165.7815, 1165.7815, 1194.6759, 1194.6759, 1277.7600, 1296.7419, 1334.9314, 1334.9314, 1448.9645, 1448.9645, 1475.8114, 1595.9777, 1595.9777, 1618.1177, 1618.1177, 1633.9124, 1732.1512, 1902.3138

42. [gi|71039991](#) Mass: 32224 Score: 38 Expect: 6e+003 Matches: 9

conserved ATPase domain protein [Macropis nuda]

ObservedMr(expt)Mr(calc)ppmStartEndMissIonsPeptide

850.5803849.5730849.507277.4143 - 1491 ---K.FLRVSTK.I

1019.58011018.57281018.5771-4.1781 - 901 ---R.LSRSSALASK.A

1151.77551150.76821150.653299.9204 - 2131 ---K.RMFVLAASIK.A + Oxidation (M)

1151.77551150.76821150.653299.9204 - 2131 ---K.RMFVLAASIK.A + Oxidation (M)

1165.78151164.77421164.697965.6253 - 2621 ---K.LSHEVLLRAK.Q

1165.78151164.77421164.697965.6253 - 2621 ---K.LSHEVLLRAK.Q

1194.67591193.66861193.640423.6109 - 1190 ---R.LPDIHNTVTGK.T

1194.67591193.66861193.640423.6109 - 1190 ---R.LPDIHNTVTGK.T

1475.81141474.80411474.8144-6.94263 - 2761 ---K.QIGFSDKQIAAAVK.S

No match to: 842.5546, 848.5696, 853.5549, 853.5549, 855.0955, 864.5864, 868.5867, 868.5867, 871.0599, 877.0814, 882.5994, 882.5994, 887.0316, 909.0287, 951.6699, 960.9595, 1017.7114, 1019.7258, 1033.7395, 1036.6012, 1036.6012, 1051.7457, 1051.7457, 1060.1041, 1082.0940, 1098.0653, 1266.6686, 1277.7600, 1296.7419, 1334.9314, 1334.9314, 1448.9645, 1448.9645, 1487.8091, 1595.9777, 1595.9777, 1618.1177, 1618.1177, 1633.9124, 1732.1512, 1784.0413, 1902.3138, 1994.0560, 2221.2212, 2284.2476

43. [gi|490661404](#) Mass: 4181 Score: 38 Expect: 6e+003 Matches: 4

hypothetical protein [Burkholderia pseudomallei]

ObservedMr(expt)Mr(calc)ppmStartEndMissIonsPeptide

1448.96451447.95721447.837282.92 - 151 ---M.RGPLEARPVGLAGR.R

1448.96451447.95721447.837282.93 - 161 ---R.GPLEARPVGLAGRR.D

1595.97771594.97041594.872661.31 - 151 ----.MRGPLEARPVGLAGR.R + Oxidation (M)

1595.97771594.97041594.872661.41 - 151 ----.MRGPLEARPVGLAGR.R + Oxidation (M)

No match to: 842.5546, 848.5696, 850.5803, 853.5549, 853.5549, 855.0955, 864.5864, 868.5867, 868.5867, 871.0599, 877.0814, 882.5994, 882.5994, 887.0316, 909.0287, 951.6699, 960.9595, 1017.7114, 1019.5801, 1019.7258, 1033.7395, 1036.6012, 1036.6012, 1051.7457, 1051.7457, 1060.1041, 1082.0940, 1098.0653, 1151.7755, 1151.7755, 1165.7815, 1165.7815, 1194.6759, 1194.6759, 1266.6686, 1277.7600, 1296.7419, 1334.9314, 1334.9314, 1475.8114, 1487.8091, 1618.1177, 1618.1177, 1633.9124, 1732.1512, 1784.0413, 1902.3138, 1994.0560, 2221.2212, 2284.2476

44. [gi|489236824](#) Mass: 65949 Score: 37 Expect: 6.2e+003 Matches: 11

multidrug ABC transporter ATP-binding protein [Gemella haemolysans]

ObservedMr(expt)Mr(calc)ppmStartEndMissIonsPeptide

848.5696847.5623847.491683.5481 - 4870 ---R.QLLTFR.T

882.5994881.5921881.508395.1525 - 5320 ---R.TTIAIAHR.L

882.5994881.5922881.508395.1525 - 5320 ---R.TTIAIAHR.L



|           |           |           |      |     |   |     |   |     |                                       |
|-----------|-----------|-----------|------|-----|---|-----|---|-----|---------------------------------------|
| 1036.6012 | 1035.5939 | 1035.4985 | 92.1 | 96  | - | 104 | 0 | --- | R.NDSFANLQK.L                         |
| 1036.6012 | 1035.5939 | 1035.4985 | 92.1 | 96  | - | 104 | 0 | --- | R.NDSFANLQK.L                         |
| 1165.7815 | 1164.7742 | 1164.6727 | 87.1 | 86  | - | 95  | 1 | --- | K.VAHSIVRDLR.N                        |
| 1165.7815 | 1164.7742 | 1164.6727 | 87.1 | 86  | - | 95  | 1 | --- | K.VAHSIVRDLR.N                        |
| 1296.7419 | 1295.7346 | 1295.6366 | 75.7 | 569 | - | 579 | 0 | --- | K.MYQLQAGMLNK.-                       |
| 1902.3138 | 1901.3065 | 1901.1172 | 99.6 | 238 | - | 254 | 1 | --- | K.SLKVDSLLLRPAMALFK.V                 |
| 1994.0560 | 1993.0487 | 1992.9251 | 62.0 | 96  | - | 112 | 1 | --- | R.NDSFANLQKLGMSYFDK.T + Oxidation (M) |
| 2221.2212 | 2220.2139 | 2220.1208 | 41.9 | 201 | - | 219 | 1 | --- | K.LSESEIGMKIIQAFNQEQR.L               |

**No match to:** 842.5546, 850.5803, 853.5549, 853.5549, 855.0955, 864.5864, 868.5867, 868.5867, 871.0599, 877.0814, 887.0316, 909.0287, 951.6699, 960.9595, 1017.7114, 1019.5801, 1019.7258, 1033.7395, 1051.7457, 1051.7457, 1060.1041, 1082.0940, 1098.0653, 1151.7755, 1151.7755, 1194.6759, 1194.6759, 1266.6686, 1277.7600, 1334.9314, 1334.9314, 1448.9645, 1448.9645, 1475.8114, 1487.8091, 1595.9777, 1595.9777, 1618.1177, 1618.1177, 1633.9124, 1732.1512, 1784.0413, 2284.2476

45. [gi|547230974](#) Mass: 17853 Score: 37 Expect: 6.4e+003 Matches: 6

transposase [Bacteroides intestinalis CAG:564]

| Observed  | Mr(expt)  | Mr(calc)  | ppm  | Start | End | Miss | Ions | Peptide                                    |
|-----------|-----------|-----------|------|-------|-----|------|------|--------------------------------------------|
| 1019.5801 | 1018.5728 | 1018.4728 | 98.2 | 51    | -   | 58   | 1    | ---<br>K.KGYMAMR.L                         |
| 1194.6759 | 1193.6686 | 1193.5676 | 84.6 | 113   | -   | 124  | 0    | ---<br>R.ATNAAESFNAK.I                     |
| 1194.6759 | 1193.6686 | 1193.5676 | 84.6 | 113   | -   | 124  | 0    | ---<br>R.ATNAAESFNAK.I                     |
| 1475.8114 | 1474.8041 | 1474.7317 | 49.1 | 2     | -   | 14   | 1    | ---<br>M.YHAPVFANGDTRK.Q                   |
| 1994.0560 | 1993.0487 | 1992.9008 | 74.2 | 52    | -   | 67   | 1    | ---<br>K.GYMMAMRLGIYHQCK.F + Oxidation (M) |
| 2221.2212 | 2220.2139 | 2220.1803 | 15.1 | 94    | -   | 111  | 1    | ---<br>R.VARSQTHYLNIIINFERR                |

**No match to:** 842.5546, 848.5696, 850.5803, 853.5549, 853.5549, 855.0955, 864.5864, 868.5867, 868.5867, 871.0599, 877.0814, 882.5994, 882.5994, 887.0316, 909.0287, 951.6699, 960.9595, 1017.7114, 1019.7258, 1033.7395, 1036.6012, 1036.6012, 1051.7457, 1051.7457, 1060.1041, 1082.0940, 1098.0653, 1151.7755, 1151.7755, 1165.7815, 1165.7815, 1266.6686, 1277.7600, 1296.7419, 1334.9314, 1334.9314, 1448.9645, 1448.9645, 1487.8091, 1595.9777, 1595.9777, 1618.1177, 1618.1177, 1633.9124, 1732.1512, 1784.0413, 1902.3138, 2284.2476

46. [gi|494229523](#) Mass: 4528 Score: 37 Expect: 6.6e+003 Matches: 6

hypothetical protein [Flavobacterium frigidis]

| Observed  | Mr (expt) | Mr (calc) | ppm  | Start | End | Miss | Ions | Peptide                                   |
|-----------|-----------|-----------|------|-------|-----|------|------|-------------------------------------------|
| 1051.7457 | 1050.7384 | 1050.6437 | 90.1 | 2     | -   | 12   | 0    | ---<br>M.PLPSGLGILGK.Q                    |
| 1051.7457 | 1050.7385 | 1050.6437 | 90.2 | 2     | -   | 12   | 0    | ---<br>M.PLPSGLGILGK.Q                    |
| 1448.9645 | 1447.9572 | 1447.8875 | 48.2 | 2     | -   | 15   | 1    | ---<br>M.PLPSGLGILGKQLR.F                 |
| 1448.9645 | 1447.9572 | 1447.8875 | 48.2 | 2     | -   | 15   | 1    | ---<br>M.PLPSGLGILGKQLR.F                 |
| 1595.9777 | 1594.9704 | 1594.9229 | 29.8 | 1     | -   | 15   | 1    | ---<br>-MPLPSGLGILGKQLR.F + Oxidation (M) |
| 1595.9777 | 1594.9704 | 1594.9229 | 29.8 | 1     | -   | 15   | 1    | ---<br>-MPLPSGLGILGKQLR.F + Oxidation (M) |

**No match to:** 842.5546, 848.5696, 850.5803, 853.5549, 853.5549, 855.0955, 864.5864, 868.5867, 868.5867, 871.0599, 877.0814, 882.5994, 882.5994, 887.0316, 909.0287, 951.6699, 960.9595, 1017.7114, 1019.5801, 1019.7258, 1033.7395, 1036.6012, 1036.6012, 1060.1041, 1082.0940, 1098.0653, 1151.7755, 1151.7755, 1165.7815, 1165.7815, 1194.6759, 1194.6759, 1266.6686, 1277.7600, 1296.7419, 1334.9314, 1334.9314, 1448.9645, 1448.9645, 1487.8091, 1618.1177, 1618.1177, 1633.9124, 1732.1512, 1784.0413, 1902.3138, 1994.0560, 2221.2212, 2284.2476

47. [gi|28493757](#) Mass: 41909 Score: 37 Expect: 6.6e+003 Matches: 6

pyruvate dehydrogenase E1 component alpha subunit [Tropheryma whipplei str. Twist]

| observed  | Mr (expt) | Mr (calc) | ppm    | Start | End   | Miss | Ions | Peptide           |
|-----------|-----------|-----------|--------|-------|-------|------|------|-------------------|
| 1036.6012 | 1035.5939 | 1035.5502 | 42.3   | 226   | - 235 | 0    | ---  | R.GYGFIPGIR.I     |
| 1036.6012 | 1035.5939 | 1035.5502 | 42.3   | 226   | - 235 | 0    | ---  | R.GYGFIPGIR.I     |
| 1194.6759 | 1193.6686 | 1193.6921 | -19.63 | 42    | - 50  | 1    | ---  | R.FYRDIILVR.Q     |
| 1194.6759 | 1193.6686 | 1193.6921 | -19.63 | 42    | - 50  | 1    | 18   | R.FYRDIILVR.Q     |
| 1475.8114 | 1474.8041 | 1474.7780 | 17.7   | 236   | - 249 | 0    | ---  | R.IDGNVDVIAAYVR.  |
| 1487.8091 | 1486.8018 | 1486.8620 | -40.46 | 318   | - 330 | 1    | ---  | R.IRADIQLSVIGFR.N |

**No match to:** 842.5546, 848.5696, 850.5803, 853.5549, 853.5549, 855.0955, 864.5864, 868.5867, 868.5867, 871.0599, 877.0814, 882.5994, 882.5994, 887.0316, 909.0287, 951.6699, 960.9595, 1017.7114, 1019.5801, 1019.7258, 1033.7395, 1051.7457, 1051.7457, 1060.1041, 1082.0940, 1098.0653, 1151.7755, 1151.7755, 1165.7815, 1165.7815, 1266.6686, 1277.7600, 1296.7419, 1334.9314, 1334.9314, 1448.9645, 1448.9645, 1595.9777, 1595.9777, 1618.1177, 1618.1177, 1633.9124, 1732.1512, 1784.0413, 1902.3138, 1994.0560, 2221.2212, 2284.2476

48. [gi|517826373](#) Mass: 12209 Score: 37 Expect: 6.7e+003 Matches: 4

hypothetical protein [Hirschia maritima]

| Observed  | Mr(expt)  | Mr(calc)  | ppm  | Start | End | Miss | Ions | Peptide                 |
|-----------|-----------|-----------|------|-------|-----|------|------|-------------------------|
| 842.5546  | 841.5473  | 841.5385  | 10.5 | 46 -  | 53  | 1    | ---  | R.AILQAKAK.T            |
| 1194.6759 | 1193.6686 | 1193.5652 | 86.7 | 26 -  | 34  | 0    | ---  | K.ENWICGFIR.S           |
| 1194.6759 | 1193.6686 | 1193.5652 | 86.7 | 26 -  | 34  | 0    | 11   | K.ENWICGFIR.S           |
| 2284.2476 | 2283.2403 | 2283.1980 | 18.6 | 82 -  | 100 | 1    | ---  | R.LNLFEYIKSFGTGFIFYPK.F |

**No match to:** 848.5696, 850.5803, 853.5549, 853.5549, 855.0955, 864.5864, 868.5867, 868.5867, 871.0599, 877.0814, 882.5994, 882.5994, 887.0316, 909.0287, 951.6699, 960.9595, 1017.7114, 1019.5801, 1019.7258, 1033.7395, 1036.6012, 1036.6012, 1051.7457, 1051.7457, 1060.1041, 1082.0940, 1098.0653, 1151.7755, 1151.7755, 1165.7815, 1165.7815, 1266.6686, 1277.7600, 1296.7419, 1334.9314, 1334.9314, 1448.9645, 1448.9645, 1487.8091, 1595.9777, 1595.9777, 1618.1177, 1618.1177, 1633.9124, 1732.1512, 1784.0413, 1902.3138, 1994.0560, 2221.2212

49. [gi|446609078](#) Mass: 29288 Score: 37 Expect: 6.7e+003 Matches: 6

prephenate dehydratase, partial [Streptococcus sp. GMD1S]

| Observed  | Mr (expt) | Mr (calc) | ppm  | Start | End | Miss | Ions | Peptide                             |
|-----------|-----------|-----------|------|-------|-----|------|------|-------------------------------------|
| 842.5546  | 841.5473  | 841.5021  | 53.7 | 223   | -   | 229  | 0    | ---<br>K.IESRPLK.T                  |
| 1036.6012 | 1035.5939 | 1035.5787 | 14.7 | 1     | -   | 9    | 1    | ---<br>-.MKIAYLGPK.G + Oxidation (M |
| 1036.6012 | 1035.5939 | 1035.5787 | 14.7 | 1     | -   | 9    | 1    | 3<br>-.MKIAYLGPK.G + Oxidation (M   |
| 1296.7419 | 1295.7346 | 1295.6986 | 27.8 | 98    | -   | 109  | 0    | ---<br>K.IFSPHQALAQGK.K             |
| 1784.0413 | 1783.0340 | 1782.8941 | 78.5 | 133   | -   | 148  | 0    | ---<br>R.FISEHPDQPYAAIAPK.S         |
| 2284.2476 | 2283.2403 | 2283.2164 | 10.5 | 3     | -   | 23   | 1    | ---<br>K.IAYLGPKGSFHHVQTAFPK.E      |

**No match to:** 848.5696, 850.5803, 853.5549, 853.5549, 855.0955, 864.5864, 868.5867, 868.5867, 871.0599, 877.0814, 882.5994, 882.5994, 887.0316, 909.0287, 951.6699, 960.9595, 1017.7114, 1019.5801, 1019.7258, 1033.7395, 1051.7457, 1051.7457, 1060.1041, 1082.0940, 1098.0653, 1151.7755, 1151.7755, 1165.7815, 1165.7815, 1194.6759, 1194.6759, 1266.6686, 1277.7600, 1334.9314, 1334.9314, 1448.9645, 1448.9645, 1475.8114, 1487.8091, 1595.9777, 1595.9777, 1618.1177, 1618.1177, 1633.9124, 1732.1512, 1902.3138, 1994.0560, 2221.2212

50. [gi|551565531](#) Mass: 42563 Score: 37 Expect: 6.9e+003 Matches: 8

hypothetical protein EMIHURAFT\_210302 [Emiliania huxleyi CCMP1516]

| Observed  | Mr(expt)  | Mr(calc)  | ppm    | Start | End | Miss | Ions | Peptide                                  |
|-----------|-----------|-----------|--------|-------|-----|------|------|------------------------------------------|
| 842.5546  | 841.5473  | 841.4658  | 96.9   | 191   | -   | 198  | 0    | ---<br>R.VPLDGVSR.L                      |
| 1036.6012 | 1035.5939 | 1035.5978 | -3.74  | 336   | -   | 343  | 0    | ---<br>K.QVLHVWVR.T                      |
| 1036.6012 | 1035.5939 | 1035.5978 | -3.74  | 336   | -   | 343  | 0    | ---<br>K.QVLHVWVR.T                      |
| 1194.6759 | 1193.6686 | 1193.6115 | 47.9   | 181   | -   | 190  | 0    | ---<br>R.FLVGEDMVLRL.V + Oxidation (M)   |
| 1194.6759 | 1193.6686 | 1193.6115 | 47.9   | 181   | -   | 190  | 0    | 6<br>R.FLVGEDMVLRL.V + Oxidation (M)     |
| 1475.8114 | 1474.8041 | 1474.8507 | -31.61 | 54    | -   | 67   | 1    | ---<br>K.LALGKLGSSIPTYR.L                |
| 1487.8091 | 1486.8018 | 1486.7715 | 20.4   | 179   | -   | 190  | 1    | ---<br>R.HRFLVGEDMVLRL.V + Oxidation (M) |

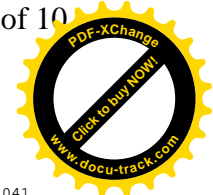

1633.9124 1632.9051 1632.9100 -2.98 156 - 170 0 --- R.WPTQKPAVLPAQAAR.K

No match to: 848.5696, 850.5803, 853.5549, 853.5549, 855.0955, 864.5864, 868.5867, 868.5867, 871.0599, 877.0814, 882.5994, 882.5994, 887.0316, 909.0287, 951.6699, 960.9595, 1017.7114, 1019.5801, 1019.7258, 1033.7395, 1051.7457, 1051.7457, 1060.1041, 1082.0940, 1098.0653, 1151.7755, 1151.7755, 1165.7815, 1165.7815, 1266.6686, 1277.7600, 1296.7419, 1334.9314, 1334.9314, 1448.9645, 1448.9645, 1595.9777, 1595.9777, 1618.1177, 1618.1177, 1732.1512, 1784.0413, 1902.3138, 1994.0560, 2221.2212, 2284.2476

## Search Parameters

Type of search : Sequence Query  
 Enzyme : Trypsin  
 Fixed modifications : [Carbamidomethyl \(C\)](#)  
 Variable modifications : [Oxidation \(M\)](#)  
 Mass values : Monoisotopic  
 Protein Mass : Unrestricted  
 Peptide Mass Tolerance :  $\pm 100$  ppm  
 Fragment Mass Tolerance :  $\pm 0.3$  Da  
 Max Missed Cleavages : 1  
 Instrument type : MALDI-TOF-TOF  
 Query1 (842.5546,1+) : <no title>  
 Query2 (848.5696,1+) : <no title>  
 Query3 (850.5803,1+) : <no title>  
 Query4 (853.5549,1+) : <no title>  
 Query5 (853.5549,1+) : Locus:1..5.0.8  
 Query6 (855.0955,1+) : <no title>  
 Query7 (864.5864,1+) : <no title>  
 Query8 (868.5867,1+) : Locus:1..5.0.7  
 Query9 (868.5867,1+) : <no title>  
 Query10 (871.0599,1+) : <no title>  
 Query11 (877.0814,1+) : <no title>  
 Query12 (882.5994,1+) : <no title>  
 Query13 (882.5994,1+) : Locus:1..5.0.4  
 Query14 (887.0316,1+) : <no title>  
 Query15 (909.0287,1+) : <no title>  
 Query16 (951.6699,1+) : <no title>  
 Query17 (960.9595,1+) : <no title>  
 Query18 (1017.7114,1+) : <no title>  
 Query19 (1019.5801,1+) : <no title>  
 Query20 (1019.7258,1+) : <no title>  
 Query21 (1033.7395,1+) : <no title>  
 Query22 (1036.6012,1+) : <no title>  
 Query23 (1036.6012,1+) : Locus:1..5.0.11  
 Query24 (1051.7457,1+) : <no title>  
 Query25 (1051.7457,1+) : Locus:1..5.0.1  
 Query26 (1060.1041,1+) : <no title>  
 Query27 (1082.0940,1+) : <no title>  
 Query28 (1098.0653,1+) : <no title>  
 Query29 (1151.7755,1+) : <no title>  
 Query30 (1151.7755,1+) : Locus:1..5.0.12  
 Query31 (1165.7815,1+) : Locus:1..5.0.6  
 Query32 (1165.7815,1+) : <no title>  
 Query33 (1194.6759,1+) : <no title>  
 Query34 (1194.6759,1+) : Locus:1..5.0.2  
 Query35 (1266.6686,1+) : <no title>  
 Query36 (1277.7600,1+) : <no title>  
 Query37 (1296.7419,1+) : <no title>  
 Query38 (1334.9314,1+) : <no title>  
 Query39 (1334.9314,1+) : Locus:1..5.0.3  
 Query40 (1448.9645,1+) : Locus:1..5.0.10  
 Query41 (1448.9645,1+) : <no title>  
 Query42 (1475.8114,1+) : <no title>  
 Query43 (1487.8091,1+) : <no title>  
 Query44 (1595.9777,1+) : Locus:1..5.0.5  
 Query45 (1595.9777,1+) : <no title>  
 Query46 (1618.1177,1+) : Locus:1..5.0.9  
 Query47 (1618.1177,1+) : <no title>  
 Query48 (1633.9124,1+) : <no title>  
 Query49 (1732.1512,1+) : <no title>  
 Query50 (1784.0413,1+) : <no title>  
 Query51 (1902.3138,1+) : <no title>  
 Query52 (1994.0560,1+) : <no title>  
 Query53 (2221.2212,1+) : <no title>  
 Query54 (2284.2476,1+) : <no title>

Mascot: <http://www.matrixscience.com/>
