# Supplementary material for: Alpha-2-Macroglobulin as a New Promising Biomarker Improving the Diagnostic Sensitivity of Bovine Paratuberculosis
Source: Frontiers journal article supplement (doi:10.3389/fvets.2021.637716), 2021-03-05
Supplement: Data_Sheet_1.zip [file Data_Sheet_1.zip]

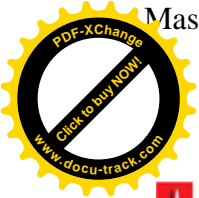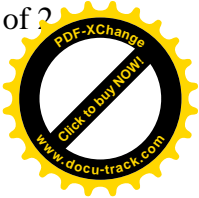

# MASCOT Search Results

## Protein View: A0A4W2BU20

Transthyretin OS=Bos indicus x Bos taurus OX=30522 GN=TTR PE=3 SV=1

Database: Uniprot\_bovine  
Score: 88  
Expect: 0.00024  
Nominal mass (M<sub>r</sub>): 15831  
Calculated pI: 5.91

Sequence similarity is available as [an NCBI BLAST search of A0A4W2BU20 against nr.](#)

### Search parameters

Enzyme: Trypsin: cuts C-term side of KR unless next residue is P.  
Fixed modifications: [Carbamidomethyl \(C\)](#)  
Variable modifications: [Oxidation \(M\)](#)

Protein sequence coverage: 40%

Matched peptides shown in **bold red**.

1 MASFRLFLLC LAGLVFVSEA GSVGAGEPKC PLMVKVLDVAV RGSPAANVGV  
51 KVFKK**AADET WEPFASGK**TS ESGELHGLTT EDKFVEGLYK VELDTKSYWK  
101 **SLGISPFHEF AEVVFTANDS GPRHYTIAAL LSPYSYSTTA LVSSPKA**

Unformatted sequence string: [147 residues](#) (for pasting into other applications).

Sort peptides by ☒ Residue Number ☐ Increasing Mass ☐ Decreasing Mass

Show predicted peptides also

| Query              | Start - End | Observed  | Mr(expt)  | Mr(calc)  | ppm   | M | Score | Peptide                     |
|--------------------|-------------|-----------|-----------|-----------|-------|---|-------|-----------------------------|
| <a href="#">41</a> | 56 - 68     | 1408.5692 | 1407.5619 | 1407.6306 | -48.8 | 0 |       | K.AADETWEFFASGK.T           |
| <a href="#">42</a> | 56 - 68     | 1408.5692 | 1407.5619 | 1407.6306 | -48.8 | 0 |       | K.AADETWEFFASGK.T           |
| <a href="#">72</a> | 101 - 123   | 2477.1138 | 2476.1065 | 2476.2023 | -38.7 | 0 | 66    | K.SLGISPFHEFAEVVFTANDSGPR.H |
| <a href="#">73</a> | 101 - 123   | 2477.1138 | 2476.1065 | 2476.2023 | -38.7 | 0 |       | K.SLGISPFHEFAEVVFTANDSGPR.H |
| <a href="#">71</a> | 124 - 146   | 2470.2014 | 2469.1941 | 2469.2791 | -34.4 | 0 |       | R.HYTIAALLSPYSYSTTALVSSPK.A |

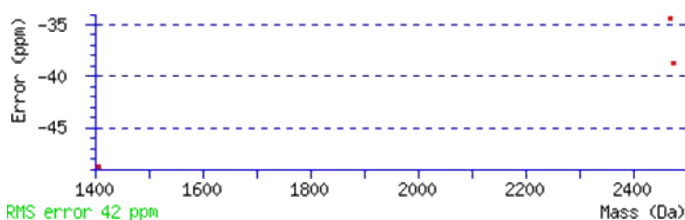

ID A0A4W2BU20\_BOBOX Unreviewed; 147 AA.  
AC A0A4W2BU20;  
DT 18-SEP-2019, integrated into UniProtKB/TrEMBL.  
DT 18-SEP-2019, sequence version 1.  
DT 26-FEB-2020, entry version 5.  
DE RecName: Full=Transthyretin {ECO:0000256|RuleBase:RU361269};  
GN Name=TTR {ECO:0000313|Ensembl:ENSBIXP00000002455};  
OS Bos indicus x Bos taurus (Hybrid cattle).  
OC Eukaryota; Metazoa; Chordata; Craniata; Vertebrata; Euteleostomi; Mammalia;  
OC Eutheria; Laurasiatheria; Artiodactyla; Ruminantia; Pecora; Bovidae;  
OC Bovinae; Bos.  
OX NCBI\_TaxID=30522 {ECO:0000313|Ensembl:ENSBIXP00000002455, ECO:0000313|Proteomes:UP000314981};  
RN [1] {ECO:0000313|Ensembl:ENSBIXP00000002455, ECO:0000313|Proteomes:UP000314981}  
RP NUCLEOTIDE SEQUENCE [LARGE SCALE GENOMIC DNA].  
RA Low W.Y., Tearle R., Bickhart D.M., Rosen B.D., Koren S., Rhie A.,  
RA Hiendleder S., Phillippy A.M., Smith T.P.L., Williams J.L.;  
RT "Haplotype-resolved cattle genomes."  
RL Submitted (NOV-2018) to the EMBL/GenBank/DDBJ databases.  
RN [2] {ECO:0000313|Ensembl:ENSBIXP00000002455}  
RP IDENTIFICATION.

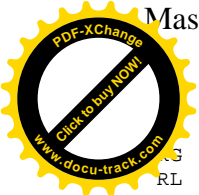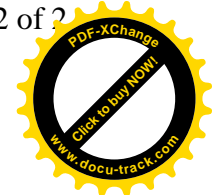

```

G      Ensembl;
RL      Submitted (JUL-2019) to UniProtKB.
CC      -!- FUNCTION: Thyroid hormone-binding protein. Probably transports
CC          thyroxine from the bloodstream to the brain.
CC          {ECO:0000256|RuleBase:RU361269}.
CC      -!- SUBUNIT: Homotetramer. {ECO:0000256|RuleBase:RU361269}.
CC      -!- SUBCELLULAR LOCATION: Secreted {ECO:0000256|RuleBase:RU361269}.
CC      -!- SIMILARITY: Belongs to the transthyretin family.
CC          {ECO:0000256|RuleBase:RU361269}.
CC      -----
CC      Copyrighted by the UniProt Consortium, see https://www.uniprot.org/terms
CC      Distributed under the Creative Commons Attribution (CC BY 4.0) License
CC      -----
DR      Ensembl; ENSBIXT00000011885; ENSBIXP00000002455; ENSBIXG00000008920.
DR      Ensembl; ENSBIXT000005046533; ENSBIXP000005035955; ENSBIXG000005017301.
DR      Proteomes; UP000314981; Chromosome 24.
DR      GO; GO:0005576; C:extracellular region; IEA:UniProtKB-SubCell.
DR      GO; GO:0042802; F:identical protein binding; IEA:Ensembl.
DR      GO; GO:0070324; F:thyroid hormone binding; IEA:InterPro.
DR      GO; GO:0042572; P:retinol metabolic process; IEA:InterPro.
DR      GO; GO:0070327; P:thyroid hormone transport; IEA:InterPro.
DR      Gene3D; 2.60.40.180; -; 1.
DR      InterPro; IPR023418; Thyroxine_BS.
DR      InterPro; IPR030178; Transthyretin.
DR      InterPro; IPR000895; Transthyretin/HIU_hydrolase.
DR      InterPro; IPR023416; Transthyretin/HIU_hydrolase_d.
DR      InterPro; IPR036817; Transthyretin/HIU_hydrolase_sf.
DR      InterPro; IPR023419; Transthyretin_CS.
DR      PANTHER; PTHR10395; PTHR10395; 1.
DR      PANTHER; PTHR10395:SF12; PTHR10395:SF12; 1.
DR      Pfam; PF00576; Transthyretin; 1.
DR      PRINTS; PR00189; TRNSTHYRETIN.
DR      SMART; SM00095; TR_THY; 1.
DR      SUPFAM; SSF49472; SSF49472; 1.
DR      PROSITE; PS00768; TRANSTHYRETIN_1; 1.
DR      PROSITE; PS00769; TRANSTHYRETIN_2; 1.
PE      3: Inferred from homology;
KW      Hormone {ECO:0000256|RuleBase:RU361269};
KW      Reference proteome {ECO:0000313|Proteomes:UP000314981};
KW      Secreted {ECO:0000256|RuleBase:RU361269};
KW      Signal {ECO:0000256|RuleBase:RU361269};
KW      Thyroid hormone {ECO:0000256|RuleBase:RU361269}.
FT      SIGNAL          1..20
FT                      /evidence="ECO:0000256|RuleBase:RU361269"
FT      CHAIN           21..147
FT                      /note="Transthyretin"
FT                      /evidence="ECO:0000256|RuleBase:RU361269"
FT                      /id="PRO_5023949286"
FT      DOMAIN          27..147
FT                      /note="TR_THY"
FT                      /evidence="ECO:0000259|SMART:SM00095"
SQ      SEQUENCE      147 AA;  15727 MW;  54C8CA7EC04478B7 CRC64;
      MASFRLFLLC LAGLVFVSEA GSVGAGEPKC PLMVKVLDVAV RGSPAANVGV KVFKKAADET
      WEPFASGKTS ESGELHGLTT EDKFEVGLYK VELDTKSYWK SLGISPFHEF AEVVFTANDS
      GPRHYTIAAL LSPYSYSTTA LVSSPKA
//
    
```

Mascot: <http://www.matrixscience.com/>
