# Supplementary material for: Alpha-2-Macroglobulin as a New Promising Biomarker Improving the Diagnostic Sensitivity of Bovine Paratuberculosis
Source: Frontiers journal article supplement (doi:10.3389/fvets.2021.637716), 2021-03-05
Supplement: Data_Sheet_1.zip [file Data_Sheet_1.zip]

MATRIX SCIENCE

Mascot Search Results

User :  
Email :  
Search title : BAEDW\2020\_3\_5\2020\_3\_5\MSMS 14\N16  
Database : Uniprot\_bovine\_bovine\_20200316 (134392 sequences; 76244912 residues)  
Timestamp : 31 Mar 2020 at 01:08:51 GMT  
Warning : A Peptide summary report will usually give a much clearer picture of MS/MS search results.  
Top Score : 251 for Q693V9, Complement component 3d (Fragment) OS=Bos taurus OX=9913 PE=2 SV=1

Mascot Score Histogram

Protein score is -10\*Log(P), where P is the probability that the observed match is a random event.  
Protein scores greater than 64 are significant (p<0.05).  
Protein scores are derived from ions scores as a non-probabilistic basis for ranking protein hits.

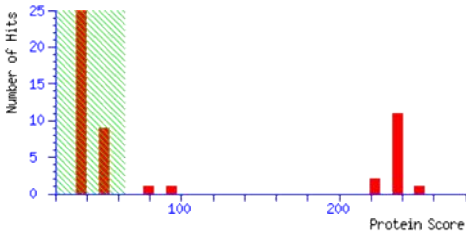

Protein Summary Report

Format As

Protein Summary (deprecated)

Help

Significance threshold p<

0.05

Max. number of hits

30

Preferred taxonomy

All entries

Re-Search All

Search Unmatched

Index

|     | Accession                  | Mass   | Score | Description                                                                                                     |
|-----|----------------------------|--------|-------|-----------------------------------------------------------------------------------------------------------------|
| 1.  | <a href="#">Q693V9</a>     | 34593  | 251   | Complement component 3d (Fragment) OS=Bos taurus OX=9913 PE=2 SV=1                                              |
| 2.  | <a href="#">A0A4W2D408</a> | 180682 | 237   | Complement C3 OS=Bos indicus x Bos taurus OX=30522 GN=C3 PE=4 SV=1                                              |
| 3.  | <a href="#">A0A3Q1MGT0</a> | 183008 | 236   | Complement C3 OS=Bos taurus OX=9913 GN=C3 PE=1 SV=1                                                             |
| 4.  | <a href="#">A0A3Q1M2B2</a> | 185169 | 235   | Complement C3 OS=Bos taurus OX=9913 GN=C3 PE=1 SV=1                                                             |
| 5.  | <a href="#">A0A4W2D441</a> | 186349 | 233   | Complement C3 OS=Bos indicus x Bos taurus OX=30522 GN=C3 PE=4 SV=1                                              |
| 6.  | <a href="#">Q2UVX4</a>     | 188675 | 232   | Complement C3 OS=Bos taurus OX=9913 GN=C3 PE=1 SV=2                                                             |
| 7.  | <a href="#">A0A0F6QNP7</a> | 188604 | 232   | Complement component 3 OS=Bos taurus OX=9913 GN=C3 PE=2 SV=1                                                    |
| 8.  | <a href="#">A0A3Q1MHV6</a> | 181738 | 231   | Complement C3 OS=Bos taurus OX=9913 GN=C3 PE=1 SV=1                                                             |
| 9.  | <a href="#">A0A4W2D3Y9</a> | 185555 | 231   | Complement C3 OS=Bos indicus x Bos taurus OX=30522 GN=C3 PE=4 SV=1                                              |
| 10. | <a href="#">A0A4W2EPV7</a> | 179159 | 231   | Complement C3 OS=Bos indicus x Bos taurus OX=30522 GN=C3 PE=4 SV=1                                              |
| 11. | <a href="#">A0A4W2D406</a> | 186684 | 231   | Complement C3 OS=Bos indicus x Bos taurus OX=30522 GN=C3 PE=4 SV=1                                              |
| 12. | <a href="#">A0A4W2D411</a> | 190190 | 230   | Complement C3 OS=Bos indicus x Bos taurus OX=30522 GN=C3 PE=4 SV=1                                              |
| 13. | <a href="#">A0A4W2CZG6</a> | 192486 | 229   | Complement C3 OS=Bos indicus x Bos taurus OX=30522 GN=C3 PE=4 SV=1                                              |
| 14. | <a href="#">A0A4W2EPT5</a> | 182918 | 229   | Complement C3 OS=Bos indicus x Bos taurus OX=30522 GN=C3 PE=4 SV=1                                              |
| 15. | <a href="#">A0A4W2HFJ5</a> | 188690 | 98    | Complement C3 OS=Bos indicus x Bos taurus OX=30522 GN=C3 PE=4 SV=1                                              |
| 16. | <a href="#">A0A4W2CZQ8</a> | 170639 | 79    | Complement C3 OS=Bos indicus x Bos taurus OX=30522 GN=C3 PE=4 SV=1                                              |
| 17. | <a href="#">A0A4W2DYP9</a> | 31930  | 54    | Phosphatidylinositol transfer protein beta OS=Bos indicus x Bos taurus OX=30522 GN=PITPNB PE=4 SV=1             |
| 18. | <a href="#">A0A4W2C513</a> | 31804  | 53    | Phosphatidylinositol transfer protein beta OS=Bos indicus x Bos taurus OX=30522 GN=PITPNB PE=4 SV=1             |
| 19. | <a href="#">Q9TR36</a>     | 31804  | 53    | Phosphatidylinositol transfer protein beta isoform OS=Bos taurus OX=9913 GN=PITPNB PE=1 SV=3                    |
| 20. | <a href="#">A0A4W2FGB2</a> | 205135 | 53    | Poly [ADP-ribose] polymerase OS=Bos indicus x Bos taurus OX=30522 GN=PARP14 PE=4 SV=1                           |
| 21. | <a href="#">A0A4W2EPF9</a> | 190854 | 50    | Poly(ADP-ribose) polymerase family member 14 OS=Bos indicus x Bos taurus OX=30522 GN=PARP14 PE=4 SV=1           |
| 22. | <a href="#">F1ML90</a>     | 204793 | 49    | Poly [ADP-ribose] polymerase OS=Bos taurus OX=9913 GN=PARP14 PE=4 SV=3                                          |
| 23. | <a href="#">A0A4W2CYS7</a> | 190256 | 48    | Poly(ADP-ribose) polymerase family member 14 OS=Bos indicus x Bos taurus OX=30522 GN=PARP14 PE=4 SV=1           |
| 24. | <a href="#">A0A3Q1MDH0</a> | 196044 | 44    | Poly [ADP-ribose] polymerase OS=Bos taurus OX=9913 GN=PARP14 PE=4 SV=1                                          |
| 25. | <a href="#">A0A4W2E5T5</a> | 31943  | 44    | Phosphatidylinositol transfer protein beta OS=Bos indicus x Bos taurus OX=30522 GN=PITPNB PE=4 SV=1             |
| 26. | <a href="#">A0A452DJF3</a> | 31845  | 43    | Phosphatidylinositol transfer protein beta isoform OS=Bos taurus OX=9913 GN=PITPNB PE=4 SV=1                    |
| 27. | <a href="#">A0A4W2DWE1</a> | 8549   | 41    | CD3e molecule OS=Bos indicus x Bos taurus OX=30522 GN=CD3E PE=4 SV=1                                            |
| 28. | <a href="#">A0A3Q1MWW7</a> | 28595  | 40    | Electron transfer flavoprotein subunit beta lysine methyltransferase OS=Bos taurus OX=9913 GN=ETFBKMT PE=4 SV=1 |
| 29. | <a href="#">A0A3Q1M1B1</a> | 29199  | 40    | Phosphatidylinositol transfer protein beta isoform OS=Bos taurus OX=9913 GN=PITPNB PE=4 SV=1                    |
| 30. | <a href="#">Q8MI17</a>     | 4845   | 40    | Insulin receptor (Fragment) OS=Bos taurus OX=9913 GN=ir-A PE=2 SV=1                                             |

Results List

| 1.                                                                 | <a href="#">Q693V9</a> | Mass: 34593 | Score: 251 | Expect: 1.1e-020 | Matches: 20                 |
|--------------------------------------------------------------------|------------------------|-------------|------------|------------------|-----------------------------|
| Complement component 3d (Fragment) OS=Bos taurus OX=9913 PE=2 SV=1 |                        |             |            |                  |                             |
| Observed                                                           | Mr(expt)               | Mr(calc)    | ppm        | Start            | End Miss Tons Peptide       |
| 845.4012                                                           | 844.3939               | 844.4191    | -29.85     | 254 - 259        | 0 --- R.WLNEQR.Y            |
| 987.5186                                                           | 986.5113               | 986.5396    | -28.69     | 42 - 49          | 0 --- R.QESLELIR.K          |
| 1083.5225                                                          | 1082.5152              | 1082.5509   | -32.98     | 51 - 59          | 0 14 K.GYTQQLAFR.Q          |
| 1083.5225                                                          | 1082.5152              | 1082.5509   | -32.94     | 51 - 59          | 0 --- K.GYTQQLAFR.Q         |
| 1143.6165                                                          | 1142.6092              | 1142.6407   | -27.57     | 41 - 49          | 1 --- K.RQESLELIR.K         |
| 1162.5488                                                          | 1161.5415              | 1161.5666   | -21.61     | 244 - 253        | 0 --- K.DYDTTPPVVR.W        |
| 1200.5436                                                          | 1199.5363              | 1199.5683   | -26.65     | 217 - 225        | 1 --- K.NRWEENQK.L          |
| 1211.6163                                                          | 1210.6090              | 1210.6458   | -30.41     | 50 - 59          | 1 --- R.KGYTQQLAFR.Q        |
| 1211.6163                                                          | 1210.6091              | 1210.6458   | -30.39     | 50 - 59          | 1 --- R.KGYTQQLAFR.Q        |
| 1221.5270                                                          | 1220.5197              | 1220.5574   | -30.90     | 171 - 180        | 0 40 K.AGDFLENHYR.E         |
| 1221.5270                                                          | 1220.5197              | 1220.5574   | -30.88     | 171 - 180        | 0 --- K.AGDFLENHYR.E        |
| 1290.6333                                                          | 1289.6260              | 1289.6616   | -27.57     | 243 - 253        | 1 --- R.KDYDTTPPVVR.W       |
| 1361.6049                                                          | 1360.5976              | 1360.6405   | -31.51     | 155 - 166        | 0 --- K.DICEAQVNSLGR.S      |
| 1790.9982                                                          | 1789.9909              | 1790.0454   | -30.45     | 184 - 200        | 0 --- R.RPYTVAIAAYALALLGK.L |
| 1790.9982                                                          | 1789.9909              | 1790.0454   | -30.43     | 184 - 200        | 0 --- R.RPYTVAIAAYALALLGK.L |
| 1880.9891                                                          | 1879.9818              | 1880.0407   | -31.31     | 226 - 242        | 0 --- K.LYNVEATSYALLALLAR.K |

1880.9891 1879.9819 1880.0407 -31.29 226 - 242 0 80 K.LYNVEATSYALLALLAR.K  
2506.2144 2505.2071 2505.2692 -24.80 62 - 83 0 --- K.SSAYAAFQYRPPSTWLTAYVVK.V  
2506.2144 2505.2071 2505.2692 -24.79 62 - 83 0 --- K.SSAYAAFQYRPPSTWLTAYVVK.V  
2598.2195 2597.2122 2597.2697 -22.12 111 - 133 0 --- K.QKPDGIFQEDGPIVHQEMIGGFR.D  
**No match to:** 842.4847, 848.4952, 850.5135, 853.4918, 857.4026, 857.4026, 864.5186, 868.5277, 870.5200, 882.5434, 882.5434, 951.5951, 996.5623, 1017.6425, 1019.6487, 1033.6698, 1036.5013, 1036.5013, 1045.5382, 1051.6785, 1051.6785, 1090.4995, 1107.5156, 1124.5784, 1131.6732, 1136.6610, 1151.6952, 1165.5533, 1165.7053, 1179.5667, 1263.6616, 1277.6742, 1300.8134, 1334.8459, 1334.8459, 1379.6898, 1407.6674, 1434.8688, 1448.8787, 1475.7053, 1479.7522, 1482.7051, 1567.6991, 1618.0178, 1732.0514, 1808.9220, 1879.9926, 1890.9176, 1901.2008, 1993.9156, 2064.0874, 2098.0544, 2157.0273, 2157.0273, 2179.9844, 2211.0493, 2283.1272

2. **A0A4W2D408** Mass: 180682 Score: 237 Expect: 2.7e-019 Matches: 28

| Complement                                                                                                                                                                                                                                                                                                                                                                                                                                                                                                                                                           | C3        | OS=Bos indicus | x      | Bos taurus | OX=30522 | GN=C3 | PE=4 | SV=1                        |  |
|----------------------------------------------------------------------------------------------------------------------------------------------------------------------------------------------------------------------------------------------------------------------------------------------------------------------------------------------------------------------------------------------------------------------------------------------------------------------------------------------------------------------------------------------------------------------|-----------|----------------|--------|------------|----------|-------|------|-----------------------------|--|
| Observed                                                                                                                                                                                                                                                                                                                                                                                                                                                                                                                                                             | Mr(expt)  | Mr(calc)       | ppm    | Start      | End      | Miss  | Ions | Peptide                     |  |
| 845.4012                                                                                                                                                                                                                                                                                                                                                                                                                                                                                                                                                             | 844.3939  | 844.3927       | 1.50   | 477        | - 484    | 0     | ---  | R.TDPGEQAK.I                |  |
| 848.4952                                                                                                                                                                                                                                                                                                                                                                                                                                                                                                                                                             | 847.4879  | 847.4400       | 56.6   | 1368       | - 1375   | 0     | ---  | K.TLSTGVDR.Y                |  |
| 850.5135                                                                                                                                                                                                                                                                                                                                                                                                                                                                                                                                                             | 849.5062  | 849.4266       | 93.8   | 639        | - 645    | 0     | ---  | R.SVQLMEK.R + Oxidation (M) |  |
| 864.5186                                                                                                                                                                                                                                                                                                                                                                                                                                                                                                                                                             | 863.5113  | 863.4939       | 20.2   | 758        | - 764    | 0     | ---  | K.LMNVFLK.D                 |  |
| 987.5186                                                                                                                                                                                                                                                                                                                                                                                                                                                                                                                                                             | 986.5113  | 986.5396       | -28.69 | 1011       | - 1018   | 0     | ---  | R.QESLELIR.K                |  |
| 996.5623                                                                                                                                                                                                                                                                                                                                                                                                                                                                                                                                                             | 995.5550  | 995.4672       | 88.2   | 650        | - 658    | 0     | ---  | K.AQYSSDLR.K                |  |
| 1083.5225                                                                                                                                                                                                                                                                                                                                                                                                                                                                                                                                                            | 1082.5152 | 1082.5509      | -32.98 | 1020       | - 1028   | 0     | 14   | K.GYTQQLAFR.Q               |  |
| 1083.5225                                                                                                                                                                                                                                                                                                                                                                                                                                                                                                                                                            | 1082.5152 | 1082.5509      | -32.94 | 1020       | - 1028   | 0     | ---  | K.GYTQQLAFR.Q               |  |
| 1090.4995                                                                                                                                                                                                                                                                                                                                                                                                                                                                                                                                                            | 1089.4922 | 1089.4873      | 4.50   | 590        | - 600    | 0     | ---  | K.ADIGCTPGSGR.N             |  |
| 1124.5784                                                                                                                                                                                                                                                                                                                                                                                                                                                                                                                                                            | 1123.5711 | 1123.5622      | 7.97   | 650        | - 659    | 1     | ---  | K.AQYSSDLRK.C               |  |
| 1143.6165                                                                                                                                                                                                                                                                                                                                                                                                                                                                                                                                                            | 1142.6092 | 1142.6407      | -27.57 | 1010       | - 1018   | 1     | ---  | K.RQESLELIR.K               |  |
| 1162.5488                                                                                                                                                                                                                                                                                                                                                                                                                                                                                                                                                            | 1161.5415 | 1161.5666      | -21.61 | 1213       | - 1222   | 0     | ---  | K.DYDTPPVVR.W               |  |
| 1200.5436                                                                                                                                                                                                                                                                                                                                                                                                                                                                                                                                                            | 1199.5363 | 1199.5683      | -26.65 | 1186       | - 1194   | 1     | ---  | K.NRWEEPNQK.L               |  |
| 1211.6163                                                                                                                                                                                                                                                                                                                                                                                                                                                                                                                                                            | 1210.6090 | 1210.6458      | -30.41 | 1019       | - 1028   | 1     | ---  | R.KGYTQQLAFR.Q              |  |
| 1211.6163                                                                                                                                                                                                                                                                                                                                                                                                                                                                                                                                                            | 1210.6091 | 1210.6458      | -30.39 | 1019       | - 1028   | 1     | ---  | R.KGYTQQLAFR.Q              |  |
| 1221.5270                                                                                                                                                                                                                                                                                                                                                                                                                                                                                                                                                            | 1220.5197 | 1220.5574      | -30.90 | 1140       | - 1149   | 0     | 40   | K.AGDFLENHYR.E              |  |
| 1221.5270                                                                                                                                                                                                                                                                                                                                                                                                                                                                                                                                                            | 1220.5197 | 1220.5574      | -30.88 | 1140       | - 1149   | 0     | ---  | K.AGDFLENHYR.E              |  |
| 1290.6333                                                                                                                                                                                                                                                                                                                                                                                                                                                                                                                                                            | 1289.6260 | 1289.6616      | -27.57 | 1212       | - 1222   | 1     | ---  | R.KDYDTPPVVR.W              |  |
| 1361.6049                                                                                                                                                                                                                                                                                                                                                                                                                                                                                                                                                            | 1360.5976 | 1360.6405      | -31.51 | 1124       | - 1135   | 0     | ---  | K.DICEAQVNSLGR.S            |  |
| 1790.9982                                                                                                                                                                                                                                                                                                                                                                                                                                                                                                                                                            | 1789.9909 | 1790.0454      | -30.45 | 1153       | - 1169   | 0     | ---  | R.RPYTVIAAAYALALLGK.L       |  |
| 1790.9982                                                                                                                                                                                                                                                                                                                                                                                                                                                                                                                                                            | 1789.9909 | 1790.0454      | -30.43 | 1153       | - 1169   | 0     | ---  | R.RPYTVIAAAYALALLGK.L       |  |
| 1880.9891                                                                                                                                                                                                                                                                                                                                                                                                                                                                                                                                                            | 1879.9818 | 1880.0407      | -31.31 | 1195       | - 1211   | 0     | ---  | K.LYNVEATSYALLALLAR.K       |  |
| 1880.9891                                                                                                                                                                                                                                                                                                                                                                                                                                                                                                                                                            | 1879.9819 | 1880.0407      | -31.29 | 1195       | - 1211   | 0     | 80   | K.LYNVEATSYALLALLAR.K       |  |
| 2157.0273                                                                                                                                                                                                                                                                                                                                                                                                                                                                                                                                                            | 2156.0200 | 2156.0783      | -27.04 | 948        | - 967    | 0     | ---  | K.ILLQGTTPVQMTEIDAIDGER.L   |  |
| 2157.0273                                                                                                                                                                                                                                                                                                                                                                                                                                                                                                                                                            | 2156.0201 | 2156.0783      | -27.02 | 948        | - 967    | 0     | 35   | K.ILLQGTTPVQMTEIDAIDGER.L   |  |
| 2506.2144                                                                                                                                                                                                                                                                                                                                                                                                                                                                                                                                                            | 2505.2071 | 2505.2692      | -24.80 | 1031       | - 1052   | 0     | ---  | K.SSAYAAFQYRPPSTWLTAYVVK.V  |  |
| 2506.2144                                                                                                                                                                                                                                                                                                                                                                                                                                                                                                                                                            | 2505.2071 | 2505.2692      | -24.79 | 1031       | - 1052   | 0     | ---  | K.SSAYAAFQYRPPSTWLTAYVVK.V  |  |
| 2598.2195                                                                                                                                                                                                                                                                                                                                                                                                                                                                                                                                                            | 2597.2122 | 2597.2697      | -22.12 | 1080       | - 1102   | 0     | ---  | K.QKPDGIFQEDGPIVHQEMIGGFR.D |  |
| <b>No match to:</b> 842.4847, 853.4918, 857.4026, 857.4026, 868.5277, 870.5200, 882.5434, 882.5434, 951.5951, 1017.6425, 1019.6487, 1033.6698, 1036.5013, 1036.5013, 1045.5382, 1051.6785, 1051.6785, 1107.5156, 1131.6732, 1136.6610, 1151.6952, 1165.5533, 1165.7053, 1179.5667, 1263.6616, 1277.6742, 1300.8134, 1334.8459, 1334.8459, 1379.6898, 1407.6674, 1434.8688, 1448.8787, 1475.7053, 1479.7522, 1482.7051, 1567.6991, 1618.0178, 1732.0514, 1808.9220, 1879.9926, 1890.9176, 1901.2008, 1993.9156, 2064.0874, 2098.0544, 2179.9844, 2211.0493, 2283.1272 |           |                |        |            |          |       |      |                             |  |

3. **A0A3Q1MGTO** Mass: 183008 Score: 236 Expect: 3.4e-019 Matches: 28

|                                                                                                                                                                                                                                                                                                                                                                                                                                                                                                                                                               |           |               |         |       |        |      |      |                              |
|---------------------------------------------------------------------------------------------------------------------------------------------------------------------------------------------------------------------------------------------------------------------------------------------------------------------------------------------------------------------------------------------------------------------------------------------------------------------------------------------------------------------------------------------------------------|-----------|---------------|---------|-------|--------|------|------|------------------------------|
| Complement                                                                                                                                                                                                                                                                                                                                                                                                                                                                                                                                                    | C3        | OS=Bos taurus | OX=9913 | GN=C3 | PE=1   | SV=1 |      |                              |
| Observed                                                                                                                                                                                                                                                                                                                                                                                                                                                                                                                                                      | Mr(expt)  | Mr(calc)      | ppm     | Start | End    | Miss | Ions | Peptide                      |
| 845.4012                                                                                                                                                                                                                                                                                                                                                                                                                                                                                                                                                      | 844.3939  | 844.3927      | 1.50    | 477   | - 484  | 0    | ---  | R.TDPGEQAK.I                 |
| 848.4952                                                                                                                                                                                                                                                                                                                                                                                                                                                                                                                                                      | 847.4879  | 847.4400      | 56.6    | 1368  | - 1375 | 0    | ---  | K.TLSTGVDR.Y                 |
| 850.5135                                                                                                                                                                                                                                                                                                                                                                                                                                                                                                                                                      | 849.5062  | 849.4266      | 93.8    | 639   | - 645  | 0    | ---  | R.SVQLMEK.R + Oxidation (M)  |
| 864.5186                                                                                                                                                                                                                                                                                                                                                                                                                                                                                                                                                      | 863.5113  | 863.4939      | 20.2    | 758   | - 764  | 0    | ---  | K.LMNVFLK.D                  |
| 987.5186                                                                                                                                                                                                                                                                                                                                                                                                                                                                                                                                                      | 986.5113  | 986.5396      | -28.69  | 1011  | - 1018 | 0    | ---  | R.QESLELIR.K                 |
| 996.5623                                                                                                                                                                                                                                                                                                                                                                                                                                                                                                                                                      | 995.5550  | 995.4672      | 88.2    | 650   | - 658  | 0    | ---  | K.AGQYSSDLR.K                |
| 1083.5225                                                                                                                                                                                                                                                                                                                                                                                                                                                                                                                                                     | 1082.5152 | 1082.5509     | -32.98  | 1020  | - 1028 | 0    | 14   | K.GYTQQLAFR.Q                |
| 1083.5225                                                                                                                                                                                                                                                                                                                                                                                                                                                                                                                                                     | 1082.5152 | 1082.5509     | -32.94  | 1020  | - 1028 | 0    | ---  | K.GYTQQLAFR.Q                |
| 1090.4995                                                                                                                                                                                                                                                                                                                                                                                                                                                                                                                                                     | 1089.4922 | 1089.4873     | 4.50    | 590   | - 600  | 0    | ---  | K.ADIGCTPGSGR.N              |
| 1124.5784                                                                                                                                                                                                                                                                                                                                                                                                                                                                                                                                                     | 1123.5711 | 1123.5622     | 7.97    | 650   | - 659  | 1    | ---  | K.AGQYSSDLRK.C               |
| 1143.6165                                                                                                                                                                                                                                                                                                                                                                                                                                                                                                                                                     | 1142.6092 | 1142.6407     | -27.57  | 1010  | - 1018 | 1    | ---  | K.RQESLELIR.K                |
| 1162.5488                                                                                                                                                                                                                                                                                                                                                                                                                                                                                                                                                     | 1161.5415 | 1161.5666     | -21.61  | 1213  | - 1222 | 0    | ---  | K.DYDTPPVVR.W                |
| 1200.5436                                                                                                                                                                                                                                                                                                                                                                                                                                                                                                                                                     | 1199.5363 | 1199.5683     | -26.65  | 1186  | - 1194 | 1    | ---  | K.NRWEEPNQK.L                |
| 1211.6163                                                                                                                                                                                                                                                                                                                                                                                                                                                                                                                                                     | 1210.6090 | 1210.6458     | -30.41  | 1019  | - 1028 | 1    | ---  | R.KGYTQQLAFR.Q               |
| 1211.6163                                                                                                                                                                                                                                                                                                                                                                                                                                                                                                                                                     | 1210.6091 | 1210.6458     | -30.39  | 1019  | - 1028 | 1    | ---  | R.KGYTQQLAFR.Q               |
| 1221.5270                                                                                                                                                                                                                                                                                                                                                                                                                                                                                                                                                     | 1220.5197 | 1220.5574     | -30.90  | 1140  | - 1149 | 0    | 40   | K.AGDFLENHYR.E               |
| 1221.5270                                                                                                                                                                                                                                                                                                                                                                                                                                                                                                                                                     | 1220.5197 | 1220.5574     | -30.88  | 1140  | - 1149 | 0    | ---  | K.AGDFLENHYR.E               |
| 1290.6333                                                                                                                                                                                                                                                                                                                                                                                                                                                                                                                                                     | 1289.6260 | 1289.6616     | -27.57  | 1212  | - 1222 | 1    | ---  | R.KDYDTPPVVR.W               |
| 1361.6049                                                                                                                                                                                                                                                                                                                                                                                                                                                                                                                                                     | 1360.5976 | 1360.6405     | -31.51  | 1124  | - 1135 | 0    | ---  | K.DICEAQVNSLGR.S             |
| 1790.9982                                                                                                                                                                                                                                                                                                                                                                                                                                                                                                                                                     | 1789.9909 | 1790.0454     | -30.45  | 1153  | - 1169 | 0    | ---  | R.RPYTVIAAAYALALLGK.L        |
| 1790.9982                                                                                                                                                                                                                                                                                                                                                                                                                                                                                                                                                     | 1789.9909 | 1790.0454     | -30.43  | 1153  | - 1169 | 0    | ---  | R.RPYTVIAAAYALALLGK.L        |
| 1880.9891                                                                                                                                                                                                                                                                                                                                                                                                                                                                                                                                                     | 1879.9818 | 1880.0407     | -31.31  | 1195  | - 1211 | 0    | ---  | K.LYNVEATSYALLALLAR.K        |
| 1880.9891                                                                                                                                                                                                                                                                                                                                                                                                                                                                                                                                                     | 1879.9819 | 1880.0407     | -31.29  | 1195  | - 1211 | 0    | 80   | K.LYNVEATSYALLALLAR.K        |
| 2157.0273                                                                                                                                                                                                                                                                                                                                                                                                                                                                                                                                                     | 2156.0200 | 2156.0783     | -27.04  | 948   | - 967  | 0    | ---  | K.ILLQGTTPVQMTEIDAIDGER.L    |
| 2157.0273                                                                                                                                                                                                                                                                                                                                                                                                                                                                                                                                                     | 2156.0201 | 2156.0783     | -27.02  | 948   | - 967  | 0    | 35   | K.ILLQGTTPVQMTEIDAIDGER.L    |
| 2506.2144                                                                                                                                                                                                                                                                                                                                                                                                                                                                                                                                                     | 2505.2071 | 2505.2692     | -24.80  | 1031  | - 1052 | 0    | ---  | K.SSAYAAFQYRPPSTWLTAYVVK.V   |
| 2506.2144                                                                                                                                                                                                                                                                                                                                                                                                                                                                                                                                                     | 2505.2071 | 2505.2692     | -24.79  | 1031  | - 1052 | 0    | ---  | K.SSAYAAFQYRPPSTWLTAYVVK.V   |
| 2598.2195                                                                                                                                                                                                                                                                                                                                                                                                                                                                                                                                                     | 2597.2122 | 2597.2697     | -22.12  | 1080  | - 1102 | 0    | ---  | K.QKPDGIFQEDGPVIVHQEMIGGFR.D |
| No match to: 842.4847, 853.4918, 857.4026, 857.4026, 868.5277, 870.5200, 882.5434, 882.5434, 951.5951, 1017.6425, 1019.6487, 1033.6698, 1036.5013, 1036.5013, 1045.5382, 1051.6785, 1051.6785, 1107.5156, 1131.6732, 1136.6610, 1151.6952, 1165.5533, 1165.7053, 1179.5667, 1263.6616, 1277.6742, 1300.8134, 1334.8459, 1334.8459, 1379.6898, 1407.6674, 1434.8688, 1448.8787, 1475.7053, 1479.7522, 1482.7051, 1567.6991, 1618.0178, 1732.0514, 1808.9220, 1879.9926, 1890.9176, 1901.2008, 1993.9156, 2064.0874, 2098.0544, 2179.9844, 2211.0493, 2283.1272 |           |               |         |       |        |      |      |                              |

4. **A0A3Q1M2B2** Mass: 185169 Score: 235 Expect: 4.2e-019 Matches: 28

|            |          |               |         |       |        |      |      |                             |  |
|------------|----------|---------------|---------|-------|--------|------|------|-----------------------------|--|
| Complement | C3       | OS=Bos taurus | OX=9913 | GN=C3 | PE=1   | SV=1 |      |                             |  |
| Observed   | Mr(expt) | Mr(calc)      | ppm     | Start | End    | Miss | Ions | Peptide                     |  |
| 845.4012   | 844.3939 | 844.3927      | 1.50    | 477   | - 484  | 0    | ---  | R.TDPGEQAK.I                |  |
| 848.4952   | 847.4879 | 847.4400      | 56.6    | 1388  | - 1395 | 0    | ---  | K.TLSTGVDR.Y                |  |
| 850.5135   | 849.5062 | 849.4266      | 93.8    | 639   | - 645  | 0    | ---  | R.SVQLMEK.R + Oxidation (M) |  |
| 864.5186   | 863.5113 | 863.4939      | 20.2    | 758   | - 764  | 0    | ---  | K.LMNVFLK.D                 |  |
| 987.5186   | 986.5113 | 986.5396      | -28.69  | 1011  | - 1018 | 0    | ---  | R.QESLELIR.K                |  |
| 996.5623   | 995.5550 | 995.4672      | 88.2    | 650   | - 658  | 0    | ---  | K.AQYSSDLR.K                |  |

|                                                                                                                                                                                                                                                                                                                                                                                                                                                                                                                                                               |           |           |        |      |   |      |   |     |                              |
|---------------------------------------------------------------------------------------------------------------------------------------------------------------------------------------------------------------------------------------------------------------------------------------------------------------------------------------------------------------------------------------------------------------------------------------------------------------------------------------------------------------------------------------------------------------|-----------|-----------|--------|------|---|------|---|-----|------------------------------|
| 1083.5225                                                                                                                                                                                                                                                                                                                                                                                                                                                                                                                                                     | 1082.5152 | 1082.5509 | -32.98 | 1020 | - | 1028 | 0 | 14  | K.GYTQQLAFR.Q                |
| 1083.5225                                                                                                                                                                                                                                                                                                                                                                                                                                                                                                                                                     | 1082.5152 | 1082.5509 | -32.94 | 1020 | - | 1028 | 0 | --- | K.GYTQQLAFR.Q                |
| 1090.4995                                                                                                                                                                                                                                                                                                                                                                                                                                                                                                                                                     | 1089.4922 | 1089.4873 | 4.50   | 590  | - | 600  | 0 | --- | K.ADIGCTPGSGR.N              |
| 1124.5784                                                                                                                                                                                                                                                                                                                                                                                                                                                                                                                                                     | 1123.5711 | 1123.5622 | 7.97   | 650  | - | 659  | 1 | --- | K.AGQYSSDLRK.C               |
| 1143.6165                                                                                                                                                                                                                                                                                                                                                                                                                                                                                                                                                     | 1142.6092 | 1142.6407 | -27.57 | 1010 | - | 1018 | 1 | --- | K.RQESLELIR.K                |
| 1162.5488                                                                                                                                                                                                                                                                                                                                                                                                                                                                                                                                                     | 1161.5415 | 1161.5666 | -21.61 | 1213 | - | 1222 | 0 | --- | K.DYDTPPPVVR.W               |
| 1200.5436                                                                                                                                                                                                                                                                                                                                                                                                                                                                                                                                                     | 1199.5363 | 1199.5683 | -26.65 | 1186 | - | 1194 | 1 | --- | K.NRWEENQK.L                 |
| 1211.6163                                                                                                                                                                                                                                                                                                                                                                                                                                                                                                                                                     | 1210.6090 | 1210.6458 | -30.41 | 1019 | - | 1028 | 1 | --- | R.KGYTQQLAFR.Q               |
| 1211.6163                                                                                                                                                                                                                                                                                                                                                                                                                                                                                                                                                     | 1210.6091 | 1210.6458 | -30.39 | 1019 | - | 1028 | 1 | --- | R.KGYTQQLAFR.Q               |
| 1221.5270                                                                                                                                                                                                                                                                                                                                                                                                                                                                                                                                                     | 1220.5197 | 1220.5574 | -30.90 | 1140 | - | 1149 | 0 | 40  | K.AGDFLENHYR.E               |
| 1221.5270                                                                                                                                                                                                                                                                                                                                                                                                                                                                                                                                                     | 1220.5197 | 1220.5574 | -30.88 | 1140 | - | 1149 | 0 | --- | K.AGDFLENHYR.E               |
| 1290.6333                                                                                                                                                                                                                                                                                                                                                                                                                                                                                                                                                     | 1289.6260 | 1289.6616 | -27.57 | 1212 | - | 1222 | 1 | --- | R.KDYDTPPPVVR.W              |
| 1361.6049                                                                                                                                                                                                                                                                                                                                                                                                                                                                                                                                                     | 1360.5976 | 1360.6405 | -31.51 | 1124 | - | 1135 | 0 | --- | K.DICEAQVNSLGR.S             |
| 1790.9982                                                                                                                                                                                                                                                                                                                                                                                                                                                                                                                                                     | 1789.9909 | 1790.0454 | -30.45 | 1153 | - | 1169 | 0 | --- | R.RPYTVIAAAYALALLGK.L        |
| 1790.9982                                                                                                                                                                                                                                                                                                                                                                                                                                                                                                                                                     | 1789.9909 | 1790.0454 | -30.43 | 1153 | - | 1169 | 0 | --- | R.RPYTVIAAAYALALLGK.L        |
| 1880.9891                                                                                                                                                                                                                                                                                                                                                                                                                                                                                                                                                     | 1879.9818 | 1880.0407 | -31.31 | 1195 | - | 1211 | 0 | --- | K.LYNVEATSYALLALLAR.K        |
| 1880.9891                                                                                                                                                                                                                                                                                                                                                                                                                                                                                                                                                     | 1879.9819 | 1880.0407 | -31.29 | 1195 | - | 1211 | 0 | 80  | K.LYNVEATSYALLALLAR.K        |
| 2157.0273                                                                                                                                                                                                                                                                                                                                                                                                                                                                                                                                                     | 2156.0200 | 2156.0783 | -27.04 | 948  | - | 967  | 0 | --- | K.ILLQGTTPVAQMTEDAIDGER.L    |
| 2157.0273                                                                                                                                                                                                                                                                                                                                                                                                                                                                                                                                                     | 2156.0201 | 2156.0783 | -27.02 | 948  | - | 967  | 0 | 35  | K.ILLQGTTPVAQMTEDAIDGER.L    |
| 2506.2144                                                                                                                                                                                                                                                                                                                                                                                                                                                                                                                                                     | 2505.2071 | 2505.2692 | -24.80 | 1031 | - | 1052 | 0 | --- | K.SSAYAAPQYRPPSTWLTAYVVK.V   |
| 2506.2144                                                                                                                                                                                                                                                                                                                                                                                                                                                                                                                                                     | 2505.2071 | 2505.2692 | -24.79 | 1031 | - | 1052 | 0 | --- | K.SSAYAAPQYRPPSTWLTAYVVK.V   |
| 2598.2195                                                                                                                                                                                                                                                                                                                                                                                                                                                                                                                                                     | 2597.2122 | 2597.2697 | -22.12 | 1080 | - | 1102 | 0 | --- | K.QKPDGIFQEDGVPVIHQEMIGGFR.D |
| No match to: 842.4847, 853.4918, 857.4026, 857.4026, 868.5277, 870.5200, 882.5434, 882.5434, 951.5951, 1017.6425, 1019.6487, 1033.6698, 1036.5013, 1036.5013, 1045.5382, 1051.6785, 1051.6785, 1107.5156, 1131.6732, 1136.6610, 1151.6952, 1165.5533, 1165.7053, 1179.5667, 1263.6616, 1277.6742, 1300.8134, 1334.8459, 1334.8459, 1379.6898, 1407.6674, 1434.8688, 1448.8787, 1475.7053, 1479.7522, 1482.7051, 1567.6991, 1618.0178, 1732.0514, 1808.9220, 1879.9926, 1890.9176, 1901.2008, 1993.9156, 2064.0874, 2098.0544, 2179.9844, 2211.0493, 2283.1272 |           |           |        |      |   |      |   |     |                              |

5. [A0A4W2D441](#) Mass: 186349 Score: 233 Expect: 6.7e-019 Matches: 28

| Complement C3 OS=Bos indicus x Bos taurus OX=30522 GN=C3 PE=4 SV=1                                                                                                                                                                                                                                                                                                                                                                                                                                                                                            |           |           |        |       |     |      |      |         |                              |
|---------------------------------------------------------------------------------------------------------------------------------------------------------------------------------------------------------------------------------------------------------------------------------------------------------------------------------------------------------------------------------------------------------------------------------------------------------------------------------------------------------------------------------------------------------------|-----------|-----------|--------|-------|-----|------|------|---------|------------------------------|
| Observed                                                                                                                                                                                                                                                                                                                                                                                                                                                                                                                                                      | Mr(expt)  | Mr(calc)  | ppm    | Start | End | Miss | Ions | Peptide |                              |
| 845.4012                                                                                                                                                                                                                                                                                                                                                                                                                                                                                                                                                      | 844.3939  | 844.3927  | 1.50   | 477   | -   | 484  | 0    | ---     | R.TDPGEQAK.I                 |
| 848.4952                                                                                                                                                                                                                                                                                                                                                                                                                                                                                                                                                      | 847.4879  | 847.4400  | 56.6   | 1419  | -   | 1426 | 0    | ---     | K.TLSTGVDR.Y                 |
| 850.5135                                                                                                                                                                                                                                                                                                                                                                                                                                                                                                                                                      | 849.5062  | 849.4266  | 93.8   | 670   | -   | 676  | 0    | ---     | R.SVQLMEK.R + Oxidation (M)  |
| 864.5186                                                                                                                                                                                                                                                                                                                                                                                                                                                                                                                                                      | 863.5113  | 863.4939  | 20.2   | 789   | -   | 795  | 0    | ---     | K.LMNVFLK.D                  |
| 987.5186                                                                                                                                                                                                                                                                                                                                                                                                                                                                                                                                                      | 986.5113  | 986.5396  | -28.69 | 1042  | -   | 1049 | 0    | ---     | R.QESLELIR.K                 |
| 996.5623                                                                                                                                                                                                                                                                                                                                                                                                                                                                                                                                                      | 995.5550  | 995.4672  | 88.2   | 681   | -   | 689  | 0    | ---     | K.AGQYSSDLR.K                |
| 1083.5225                                                                                                                                                                                                                                                                                                                                                                                                                                                                                                                                                     | 1082.5152 | 1082.5509 | -32.98 | 1051  | -   | 1059 | 0    | 14      | K.GYTQQLAFR.Q                |
| 1083.5225                                                                                                                                                                                                                                                                                                                                                                                                                                                                                                                                                     | 1082.5152 | 1082.5509 | -32.94 | 1051  | -   | 1059 | 0    | ---     | K.GYTQQLAFR.Q                |
| 1090.4995                                                                                                                                                                                                                                                                                                                                                                                                                                                                                                                                                     | 1089.4922 | 1089.4873 | 4.50   | 621   | -   | 631  | 0    | ---     | K.ADIGCTPGSGR.N              |
| 1124.5784                                                                                                                                                                                                                                                                                                                                                                                                                                                                                                                                                     | 1123.5711 | 1123.5622 | 7.97   | 681   | -   | 690  | 1    | ---     | K.AGQYSSDLRK.C               |
| 1143.6165                                                                                                                                                                                                                                                                                                                                                                                                                                                                                                                                                     | 1142.6092 | 1142.6407 | -27.57 | 1041  | -   | 1049 | 1    | ---     | K.RQESLELIR.K                |
| 1162.5488                                                                                                                                                                                                                                                                                                                                                                                                                                                                                                                                                     | 1161.5415 | 1161.5666 | -21.61 | 1244  | -   | 1253 | 0    | ---     | K.DYDTPPPVVR.W               |
| 1200.5436                                                                                                                                                                                                                                                                                                                                                                                                                                                                                                                                                     | 1199.5363 | 1199.5683 | -26.65 | 1217  | -   | 1225 | 1    | ---     | K.NRWEENQK.L                 |
| 1211.6163                                                                                                                                                                                                                                                                                                                                                                                                                                                                                                                                                     | 1210.6090 | 1210.6458 | -30.41 | 1050  | -   | 1059 | 1    | ---     | R.KGYTQQLAFR.Q               |
| 1211.6163                                                                                                                                                                                                                                                                                                                                                                                                                                                                                                                                                     | 1210.6091 | 1210.6458 | -30.39 | 1050  | -   | 1059 | 1    | ---     | R.KGYTQQLAFR.Q               |
| 1221.5270                                                                                                                                                                                                                                                                                                                                                                                                                                                                                                                                                     | 1220.5197 | 1220.5574 | -30.90 | 1171  | -   | 1180 | 0    | 40      | K.AGDFLENHYR.E               |
| 1221.5270                                                                                                                                                                                                                                                                                                                                                                                                                                                                                                                                                     | 1220.5197 | 1220.5574 | -30.88 | 1171  | -   | 1180 | 0    | ---     | K.AGDFLENHYR.E               |
| 1290.6333                                                                                                                                                                                                                                                                                                                                                                                                                                                                                                                                                     | 1289.6260 | 1289.6616 | -27.57 | 1243  | -   | 1253 | 1    | ---     | R.KDYDTPPPVVR.W              |
| 1361.6049                                                                                                                                                                                                                                                                                                                                                                                                                                                                                                                                                     | 1360.5976 | 1360.6405 | -31.51 | 1155  | -   | 1166 | 0    | ---     | K.DICEAQVNSLGR.S             |
| 1790.9982                                                                                                                                                                                                                                                                                                                                                                                                                                                                                                                                                     | 1789.9909 | 1790.0454 | -30.45 | 1184  | -   | 1200 | 0    | ---     | R.RPYTVIAAAYALALLGK.L        |
| 1790.9982                                                                                                                                                                                                                                                                                                                                                                                                                                                                                                                                                     | 1789.9909 | 1790.0454 | -30.43 | 1184  | -   | 1200 | 0    | ---     | R.RPYTVIAAAYALALLGK.L        |
| 1880.9891                                                                                                                                                                                                                                                                                                                                                                                                                                                                                                                                                     | 1879.9818 | 1880.0407 | -31.31 | 1226  | -   | 1242 | 0    | ---     | K.LYNVEATSYALLALLAR.K        |
| 1880.9891                                                                                                                                                                                                                                                                                                                                                                                                                                                                                                                                                     | 1879.9819 | 1880.0407 | -31.29 | 1226  | -   | 1242 | 0    | 80      | K.LYNVEATSYALLALLAR.K        |
| 2157.0273                                                                                                                                                                                                                                                                                                                                                                                                                                                                                                                                                     | 2156.0200 | 2156.0783 | -27.04 | 979   | -   | 998  | 0    | ---     | K.ILLQGTTPVAQMTEDAIDGER.L    |
| 2157.0273                                                                                                                                                                                                                                                                                                                                                                                                                                                                                                                                                     | 2156.0201 | 2156.0783 | -27.02 | 979   | -   | 998  | 0    | 35      | K.ILLQGTTPVAQMTEDAIDGER.L    |
| 2506.2144                                                                                                                                                                                                                                                                                                                                                                                                                                                                                                                                                     | 2505.2071 | 2505.2692 | -24.80 | 1062  | -   | 1083 | 0    | ---     | K.SSAYAAPQYRPPSTWLTAYVVK.V   |
| 2506.2144                                                                                                                                                                                                                                                                                                                                                                                                                                                                                                                                                     | 2505.2071 | 2505.2692 | -24.79 | 1062  | -   | 1083 | 0    | ---     | K.SSAYAAPQYRPPSTWLTAYVVK.V   |
| 2598.2195                                                                                                                                                                                                                                                                                                                                                                                                                                                                                                                                                     | 2597.2122 | 2597.2697 | -22.12 | 1111  | -   | 1133 | 0    | ---     | K.QKPDGIFQEDGVPVIHQEMIGGFR.D |
| No match to: 842.4847, 853.4918, 857.4026, 857.4026, 868.5277, 870.5200, 882.5434, 882.5434, 951.5951, 1017.6425, 1019.6487, 1033.6698, 1036.5013, 1036.5013, 1045.5382, 1051.6785, 1051.6785, 1107.5156, 1131.6732, 1136.6610, 1151.6952, 1165.5533, 1165.7053, 1179.5667, 1263.6616, 1277.6742, 1300.8134, 1334.8459, 1334.8459, 1379.6898, 1407.6674, 1434.8688, 1448.8787, 1475.7053, 1479.7522, 1482.7051, 1567.6991, 1618.0178, 1732.0514, 1808.9220, 1879.9926, 1890.9176, 1901.2008, 1993.9156, 2064.0874, 2098.0544, 2179.9844, 2211.0493, 2283.1272 |           |           |        |       |     |      |      |         |                              |

6. [Q2UVX4](#) Mass: 188675 Score: 232 Expect: 8.5e-019 Matches: 28

| Complement C3 OS=Bos taurus OX=9913 GN=C3 PE=1 SV=2 |           |           |        |       |     |      |      |         |                             |
|-----------------------------------------------------|-----------|-----------|--------|-------|-----|------|------|---------|-----------------------------|
| Observed                                            | Mr(expt)  | Mr(calc)  | ppm    | Start | End | Miss | Ions | Peptide |                             |
| 845.4012                                            | 844.3939  | 844.3927  | 1.50   | 477   | -   | 484  | 0    | ---     | R.TDPGEQAK.I                |
| 848.4952                                            | 847.4879  | 847.4400  | 56.6   | 1419  | -   | 1426 | 0    | ---     | K.TLSTGVDR.Y                |
| 850.5135                                            | 849.5062  | 849.4266  | 93.8   | 670   | -   | 676  | 0    | ---     | R.SVQLMEK.R + Oxidation (M) |
| 864.5186                                            | 863.5113  | 863.4939  | 20.2   | 789   | -   | 795  | 0    | ---     | K.LMNVFLK.D                 |
| 987.5186                                            | 986.5113  | 986.5396  | -28.69 | 1042  | -   | 1049 | 0    | ---     | R.QESLELIR.K                |
| 996.5623                                            | 995.5550  | 995.4672  | 88.2   | 681   | -   | 689  | 0    | ---     | K.AGQYSSDLR.K               |
| 1083.5225                                           | 1082.5152 | 1082.5509 | -32.98 | 1051  | -   | 1059 | 0    | 14      | K.GYTQQLAFR.Q               |
| 1083.5225                                           | 1082.5152 | 1082.5509 | -32.94 | 1051  | -   | 1059 | 0    | ---     | K.GYTQQLAFR.Q               |
| 1090.4995                                           | 1089.4922 | 1089.4873 | 4.50   | 621   | -   | 631  | 0    | ---     | K.ADIGCTPGSGR.N             |
| 1124.5784                                           | 1123.5711 | 1123.5622 | 7.97   | 681   | -   | 690  | 1    | ---     | K.AGQYSSDLRK.C              |
| 1143.6165                                           | 1142.6092 | 1142.6407 | -27.57 | 1041  | -   | 1049 | 1    | ---     | K.RQESLELIR.K               |
| 1162.5488                                           | 1161.5415 | 1161.5666 | -21.61 | 1244  | -   | 1253 | 0    | ---     | K.DYDTPPPVVR.W              |
| 1200.5436                                           | 1199.5363 | 1199.5683 | -26.65 | 1217  | -   | 1225 | 1    | ---     | K.NRWEENQK.L                |
| 1211.6163                                           | 1210.6090 | 1210.6458 | -30.41 | 1050  | -   | 1059 | 1    | ---     | R.KGYTQQLAFR.Q              |
| 1211.6163                                           | 1210.6091 | 1210.6458 | -30.39 | 1050  | -   | 1059 | 1    | ---     | R.KGYTQQLAFR.Q              |
| 1221.5270                                           | 1220.5197 | 1220.5574 | -30.90 | 1171  | -   | 1180 | 0    | 40      | K.AGDFLENHYR.E              |
| 1221.5270                                           | 1220.5197 | 1220.5574 | -30.88 | 1171  | -   | 1180 | 0    | ---     | K.AGDFLENHYR.E              |
| 1290.6333                                           | 1289.6260 | 1289.6616 | -27.57 | 1243  | -   | 1253 | 1    | ---     | R.KDYDTPPPVVR.W             |
| 1361.6049                                           | 1360.5976 | 1360.6405 | -31.51 | 1155  | -   | 1166 | 0    | ---     | K.DICEAQVNSLGR.S            |
| 1790.9982                                           | 1789.9909 | 1790.0454 | -30.45 | 1184  | -   | 1200 | 0    | ---     | R.RPYTVIAAAYALALLGK.L       |
| 1790.9982                                           | 1789.9909 | 1790.0454 | -30.43 | 1184  | -   | 1200 | 0    | ---     | R.RPYTVIAAAYALALLGK.L       |
| 1880.9891                                           | 1879.9818 | 1880.0407 | -31.31 | 1226  | -   | 1242 | 0    | ---     | K.LYNVEATSYALLALLAR.K       |
| 1880.9891                                           | 1879.9819 | 1880.0407 | -31.29 | 1226  | -   | 1242 | 0    | 80      | K.LYNVEATSYALLALLAR.K       |
| 2157.0273                                           | 2156.0200 | 2156.0783 | -27.04 | 979   | -   | 998  | 0    | ---     | K.ILLQGTTPVAQMTEDAIDGER.L   |
| 2157.0273                                           | 2156.0201 | 2156.0783 | -27.02 | 979   | -   | 998  | 0    | 35      | K.ILLQGTTPVAQMTEDAIDGER.L   |

2506.2144 2505.2071 2505.2692 -24.80 1062 - 1083 0 --- K.SSAYAAAFQYRPPSTWLTAYVVK.V  
2506.2144 2505.2071 2505.2692 -24.79 1062 - 1083 0 --- K.SSAYAAAFQYRPPSTWLTAYVVK.V  
2598.2195 2597.2122 2597.2697 -22.12 1111 - 1133 0 --- K.QKPDGIFQEDGVPVIHQEMIGGF.R.D  
**No match to:** 842.4847, 853.4918, 857.4026, 857.4026, 868.5277, 870.5200, 882.5434, 882.5434, 951.5951, 1017.6425, 1019.6487, 1033.6698, 1036.5013, 1036.5013, 1045.5382, 1051.6785, 1051.6785, 1107.5156, 1131.6732, 1136.6610, 1151.6952, 1165.5533, 1165.7053, 1179.5667, 1263.6616, 1277.6742, 1300.8134, 1334.8459, 1334.8459, 1379.6898, 1407.6674, 1434.8688, 1448.8787, 1475.7053, 1479.7522, 1482.7051, 1567.6991, 1618.0178, 1732.0514, 1808.9220, 1879.9926, 1890.9176, 1901.2008, 1993.9156, 2064.0874, 2098.0544, 2179.9844, 2211.0493, 2283.1272

7. [A0A0F6QNP7](#) Mass: 188604 Score: 232 Expect: 8.5e-019 Matches: 28

| Complement component 3 OS=Bos taurus OX=9913 GN=C3 PE=2 SV=1                                                                                                                                                                                                                                                                                                                                                                                                                                                                                                         |           |           |        |       |     |      |      |         |                               |
|----------------------------------------------------------------------------------------------------------------------------------------------------------------------------------------------------------------------------------------------------------------------------------------------------------------------------------------------------------------------------------------------------------------------------------------------------------------------------------------------------------------------------------------------------------------------|-----------|-----------|--------|-------|-----|------|------|---------|-------------------------------|
| Observed                                                                                                                                                                                                                                                                                                                                                                                                                                                                                                                                                             | Mr(expt)  | Mr(calc)  | ppm    | Start | End | Miss | Ions | Peptide |                               |
| 845.4012                                                                                                                                                                                                                                                                                                                                                                                                                                                                                                                                                             | 844.3939  | 844.3927  | 1.50   | 477   | -   | 484  | 0    | ---     | R.TDPGEQAK.I                  |
| 848.4952                                                                                                                                                                                                                                                                                                                                                                                                                                                                                                                                                             | 847.4879  | 847.4400  | 56.6   | 1419  | -   | 1426 | 0    | ---     | K.TLSTGVDR.Y                  |
| 850.5135                                                                                                                                                                                                                                                                                                                                                                                                                                                                                                                                                             | 849.5062  | 849.4266  | 93.8   | 670   | -   | 676  | 0    | ---     | R.SVQLMEK.R + Oxidation (M)   |
| 853.4918                                                                                                                                                                                                                                                                                                                                                                                                                                                                                                                                                             | 852.4845  | 852.4779  | 7.76   | 789   | -   | 795  | 0    | ---     | K.LMSVFLK.D + Oxidation (M)   |
| 987.5186                                                                                                                                                                                                                                                                                                                                                                                                                                                                                                                                                             | 986.5113  | 986.5396  | -28.69 | 1042  | -   | 1049 | 0    | ---     | R.QESLELIR.K                  |
| 996.5623                                                                                                                                                                                                                                                                                                                                                                                                                                                                                                                                                             | 995.5550  | 995.4672  | 88.2   | 681   | -   | 689  | 0    | ---     | K.AGQYSSDLR.K                 |
| 1083.5225                                                                                                                                                                                                                                                                                                                                                                                                                                                                                                                                                            | 1082.5152 | 1082.5509 | -32.98 | 1051  | -   | 1059 | 0    | 14      | K.GYTQQLAFR.Q                 |
| 1083.5225                                                                                                                                                                                                                                                                                                                                                                                                                                                                                                                                                            | 1082.5152 | 1082.5509 | -32.94 | 1051  | -   | 1059 | 0    | ---     | K.GYTQQLAFR.Q                 |
| 1090.4995                                                                                                                                                                                                                                                                                                                                                                                                                                                                                                                                                            | 1089.4922 | 1089.4873 | 4.50   | 621   | -   | 631  | 0    | ---     | K.ADIGCTPGSGR.N               |
| 1124.5784                                                                                                                                                                                                                                                                                                                                                                                                                                                                                                                                                            | 1123.5711 | 1123.5622 | 7.97   | 681   | -   | 690  | 1    | ---     | K.AGQYSSDLRK.C                |
| 1143.6165                                                                                                                                                                                                                                                                                                                                                                                                                                                                                                                                                            | 1142.6092 | 1142.6407 | -27.57 | 1041  | -   | 1049 | 1    | ---     | K.RQESLELIR.K                 |
| 1162.5488                                                                                                                                                                                                                                                                                                                                                                                                                                                                                                                                                            | 1161.5415 | 1161.5666 | -21.61 | 1244  | -   | 1253 | 0    | ---     | K.DYDTTPPVVR.W                |
| 1200.5436                                                                                                                                                                                                                                                                                                                                                                                                                                                                                                                                                            | 1199.5363 | 1199.5683 | -26.65 | 1217  | -   | 1225 | 1    | ---     | K.NRWEENPQK.L                 |
| 1211.6163                                                                                                                                                                                                                                                                                                                                                                                                                                                                                                                                                            | 1210.6090 | 1210.6458 | -30.41 | 1050  | -   | 1059 | 1    | ---     | R.KGYTQQLAFR.Q                |
| 1211.6163                                                                                                                                                                                                                                                                                                                                                                                                                                                                                                                                                            | 1210.6091 | 1210.6458 | -30.39 | 1050  | -   | 1059 | 1    | ---     | R.KGYTQQLAFR.Q                |
| 1221.5270                                                                                                                                                                                                                                                                                                                                                                                                                                                                                                                                                            | 1220.5197 | 1220.5574 | -30.90 | 1171  | -   | 1180 | 0    | 40      | K.AGDFLENHYR.E                |
| 1221.5270                                                                                                                                                                                                                                                                                                                                                                                                                                                                                                                                                            | 1220.5197 | 1220.5574 | -30.88 | 1171  | -   | 1180 | 0    | ---     | K.AGDFLENHYR.E                |
| 1290.6333                                                                                                                                                                                                                                                                                                                                                                                                                                                                                                                                                            | 1289.6260 | 1289.6616 | -27.57 | 1243  | -   | 1253 | 1    | ---     | R.KDYDTTPPVVR.W               |
| 1361.6049                                                                                                                                                                                                                                                                                                                                                                                                                                                                                                                                                            | 1360.5976 | 1360.6405 | -31.51 | 1155  | -   | 1166 | 0    | ---     | K.DICEAQVNSLGR.S              |
| 1790.9982                                                                                                                                                                                                                                                                                                                                                                                                                                                                                                                                                            | 1789.9909 | 1790.0454 | -30.45 | 1184  | -   | 1200 | 0    | ---     | R.RPYTVIAAAYALALLGK.L         |
| 1790.9982                                                                                                                                                                                                                                                                                                                                                                                                                                                                                                                                                            | 1789.9909 | 1790.0454 | -30.43 | 1184  | -   | 1200 | 0    | ---     | R.RPYTVIAAAYALALLGK.L         |
| 1880.9891                                                                                                                                                                                                                                                                                                                                                                                                                                                                                                                                                            | 1879.9818 | 1880.0407 | -31.31 | 1226  | -   | 1242 | 0    | ---     | K.LYNVEATSYALLALLAR.K         |
| 1880.9891                                                                                                                                                                                                                                                                                                                                                                                                                                                                                                                                                            | 1879.9819 | 1880.0407 | -31.29 | 1226  | -   | 1242 | 0    | 80      | K.LYNVEATSYALLALLAR.K         |
| 2157.0273                                                                                                                                                                                                                                                                                                                                                                                                                                                                                                                                                            | 2156.0200 | 2156.0783 | -27.04 | 979   | -   | 998  | 0    | ---     | K.ILLQGTTPVQMTEAIDGER.L       |
| 2157.0273                                                                                                                                                                                                                                                                                                                                                                                                                                                                                                                                                            | 2156.0201 | 2156.0783 | -27.02 | 979   | -   | 998  | 0    | 35      | K.ILLQGTTPVQMTEAIDGER.L       |
| 2506.2144                                                                                                                                                                                                                                                                                                                                                                                                                                                                                                                                                            | 2505.2071 | 2505.2692 | -24.80 | 1062  | -   | 1083 | 0    | ---     | K.SSAYAAAFQYRPPSTWLTAYVVK.V   |
| 2506.2144                                                                                                                                                                                                                                                                                                                                                                                                                                                                                                                                                            | 2505.2071 | 2505.2692 | -24.79 | 1062  | -   | 1083 | 0    | ---     | K.SSAYAAAFQYRPPSTWLTAYVVK.V   |
| 2598.2195                                                                                                                                                                                                                                                                                                                                                                                                                                                                                                                                                            | 2597.2122 | 2597.2697 | -22.12 | 1111  | -   | 1133 | 0    | ---     | K.QKPDGIFQEDGVPVIHQEMIGGF.R.D |
| <b>No match to:</b> 842.4847, 857.4026, 857.4026, 864.5186, 868.5277, 870.5200, 882.5434, 882.5434, 951.5951, 1017.6425, 1019.6487, 1033.6698, 1036.5013, 1036.5013, 1045.5382, 1051.6785, 1051.6785, 1107.5156, 1131.6732, 1136.6610, 1151.6952, 1165.5533, 1165.7053, 1179.5667, 1263.6616, 1277.6742, 1300.8134, 1334.8459, 1334.8459, 1379.6898, 1407.6674, 1434.8688, 1448.8787, 1475.7053, 1479.7522, 1482.7051, 1567.6991, 1618.0178, 1732.0514, 1808.9220, 1879.9926, 1890.9176, 1901.2008, 1993.9156, 2064.0874, 2098.0544, 2179.9844, 2211.0493, 2283.1272 |           |           |        |       |     |      |      |         |                               |

8. [A0A3Q1MHV6](#) Mass: 181738 Score: 231 Expect: 1.1e-018 Matches: 27

| Complement C3 OS=Bos taurus OX=9913 GN=C3 PE=1 SV=1                                                                                                                                                                                                                                                                                                                                                                                                                                                                                                                            |           |           |        |       |     |      |      |         |                               |
|--------------------------------------------------------------------------------------------------------------------------------------------------------------------------------------------------------------------------------------------------------------------------------------------------------------------------------------------------------------------------------------------------------------------------------------------------------------------------------------------------------------------------------------------------------------------------------|-----------|-----------|--------|-------|-----|------|------|---------|-------------------------------|
| Observed                                                                                                                                                                                                                                                                                                                                                                                                                                                                                                                                                                       | Mr(expt)  | Mr(calc)  | ppm    | Start | End | Miss | Ions | Peptide |                               |
| 845.4012                                                                                                                                                                                                                                                                                                                                                                                                                                                                                                                                                                       | 844.3939  | 844.3927  | 1.50   | 477   | -   | 484  | 0    | ---     | R.TDPGEQAK.I                  |
| 850.5135                                                                                                                                                                                                                                                                                                                                                                                                                                                                                                                                                                       | 849.5062  | 849.4266  | 93.8   | 639   | -   | 645  | 0    | ---     | R.SVQLMEK.R + Oxidation (M)   |
| 864.5186                                                                                                                                                                                                                                                                                                                                                                                                                                                                                                                                                                       | 863.5113  | 863.4939  | 20.2   | 758   | -   | 764  | 0    | ---     | K.LMNVFLK.D                   |
| 987.5186                                                                                                                                                                                                                                                                                                                                                                                                                                                                                                                                                                       | 986.5113  | 986.5396  | -28.69 | 1011  | -   | 1018 | 0    | ---     | R.QESLELIR.K                  |
| 996.5623                                                                                                                                                                                                                                                                                                                                                                                                                                                                                                                                                                       | 995.5550  | 995.4672  | 88.2   | 650   | -   | 658  | 0    | ---     | K.AGQYSSDLR.K                 |
| 1083.5225                                                                                                                                                                                                                                                                                                                                                                                                                                                                                                                                                                      | 1082.5152 | 1082.5509 | -32.98 | 1020  | -   | 1028 | 0    | 14      | K.GYTQQLAFR.Q                 |
| 1083.5225                                                                                                                                                                                                                                                                                                                                                                                                                                                                                                                                                                      | 1082.5152 | 1082.5509 | -32.94 | 1020  | -   | 1028 | 0    | ---     | K.GYTQQLAFR.Q                 |
| 1090.4995                                                                                                                                                                                                                                                                                                                                                                                                                                                                                                                                                                      | 1089.4922 | 1089.4873 | 4.50   | 590   | -   | 600  | 0    | ---     | K.ADIGCTPGSGR.N               |
| 1124.5784                                                                                                                                                                                                                                                                                                                                                                                                                                                                                                                                                                      | 1123.5711 | 1123.5622 | 7.97   | 650   | -   | 659  | 1    | ---     | K.AGQYSSDLRK.C                |
| 1143.6165                                                                                                                                                                                                                                                                                                                                                                                                                                                                                                                                                                      | 1142.6092 | 1142.6407 | -27.57 | 1010  | -   | 1018 | 1    | ---     | K.RQESLELIR.K                 |
| 1162.5488                                                                                                                                                                                                                                                                                                                                                                                                                                                                                                                                                                      | 1161.5415 | 1161.5666 | -21.61 | 1213  | -   | 1222 | 0    | ---     | K.DYDTTPPVVR.W                |
| 1200.5436                                                                                                                                                                                                                                                                                                                                                                                                                                                                                                                                                                      | 1199.5363 | 1199.5683 | -26.65 | 1186  | -   | 1194 | 1    | ---     | K.NRWEENPQK.L                 |
| 1211.6163                                                                                                                                                                                                                                                                                                                                                                                                                                                                                                                                                                      | 1210.6090 | 1210.6458 | -30.41 | 1019  | -   | 1028 | 1    | ---     | R.KGYTQQLAFR.Q                |
| 1211.6163                                                                                                                                                                                                                                                                                                                                                                                                                                                                                                                                                                      | 1210.6091 | 1210.6458 | -30.39 | 1019  | -   | 1028 | 1    | ---     | R.KGYTQQLAFR.Q                |
| 1221.5270                                                                                                                                                                                                                                                                                                                                                                                                                                                                                                                                                                      | 1220.5197 | 1220.5574 | -30.90 | 1140  | -   | 1149 | 0    | 40      | K.AGDFLENHYR.E                |
| 1221.5270                                                                                                                                                                                                                                                                                                                                                                                                                                                                                                                                                                      | 1220.5197 | 1220.5574 | -30.88 | 1140  | -   | 1149 | 0    | ---     | K.AGDFLENHYR.E                |
| 1290.6333                                                                                                                                                                                                                                                                                                                                                                                                                                                                                                                                                                      | 1289.6260 | 1289.6616 | -27.57 | 1212  | -   | 1222 | 1    | ---     | R.KDYDTTPPVVR.W               |
| 1361.6049                                                                                                                                                                                                                                                                                                                                                                                                                                                                                                                                                                      | 1360.5976 | 1360.6405 | -31.51 | 1124  | -   | 1135 | 0    | ---     | K.DICEAQVNSLGR.S              |
| 1790.9982                                                                                                                                                                                                                                                                                                                                                                                                                                                                                                                                                                      | 1789.9909 | 1790.0454 | -30.45 | 1153  | -   | 1169 | 0    | ---     | R.RPYTVIAAAYALALLGK.L         |
| 1790.9982                                                                                                                                                                                                                                                                                                                                                                                                                                                                                                                                                                      | 1789.9909 | 1790.0454 | -30.43 | 1153  | -   | 1169 | 0    | ---     | R.RPYTVIAAAYALALLGK.L         |
| 1880.9891                                                                                                                                                                                                                                                                                                                                                                                                                                                                                                                                                                      | 1879.9818 | 1880.0407 | -31.31 | 1195  | -   | 1211 | 0    | ---     | K.LYNVEATSYALLALLAR.K         |
| 1880.9891                                                                                                                                                                                                                                                                                                                                                                                                                                                                                                                                                                      | 1879.9819 | 1880.0407 | -31.29 | 1195  | -   | 1211 | 0    | 80      | K.LYNVEATSYALLALLAR.K         |
| 2157.0273                                                                                                                                                                                                                                                                                                                                                                                                                                                                                                                                                                      | 2156.0200 | 2156.0783 | -27.04 | 948   | -   | 967  | 0    | ---     | K.ILLQGTTPVQMTEAIDGER.L       |
| 2157.0273                                                                                                                                                                                                                                                                                                                                                                                                                                                                                                                                                                      | 2156.0201 | 2156.0783 | -27.02 | 948   | -   | 967  | 0    | 35      | K.ILLQGTTPVQMTEAIDGER.L       |
| 2506.2144                                                                                                                                                                                                                                                                                                                                                                                                                                                                                                                                                                      | 2505.2071 | 2505.2692 | -24.80 | 1031  | -   | 1052 | 0    | ---     | K.SSAYAAAFQYRPPSTWLTAYVVK.V   |
| 2506.2144                                                                                                                                                                                                                                                                                                                                                                                                                                                                                                                                                                      | 2505.2071 | 2505.2692 | -24.79 | 1031  | -   | 1052 | 0    | ---     | K.SSAYAAAFQYRPPSTWLTAYVVK.V   |
| 2598.2195                                                                                                                                                                                                                                                                                                                                                                                                                                                                                                                                                                      | 2597.2122 | 2597.2697 | -22.12 | 1080  | -   | 1102 | 0    | ---     | K.QKPDGIFQEDGVPVIHQEMIGGF.R.D |
| <b>No match to:</b> 842.4847, 848.4952, 853.4918, 857.4026, 857.4026, 868.5277, 870.5200, 882.5434, 882.5434, 951.5951, 1017.6425, 1019.6487, 1033.6698, 1036.5013, 1036.5013, 1045.5382, 1051.6785, 1051.6785, 1107.5156, 1131.6732, 1136.6610, 1151.6952, 1165.5533, 1165.7053, 1179.5667, 1263.6616, 1277.6742, 1300.8134, 1334.8459, 1334.8459, 1379.6898, 1407.6674, 1434.8688, 1448.8787, 1475.7053, 1479.7522, 1482.7051, 1567.6991, 1618.0178, 1732.0514, 1808.9220, 1879.9926, 1890.9176, 1901.2008, 1993.9156, 2064.0874, 2098.0544, 2179.9844, 2211.0493, 2283.1272 |           |           |        |       |     |      |      |         |                               |

9. [A0A4W2D3Y9](#) Mass: 185555 Score: 231 Expect: 1.1e-018 Matches: 28

| Complement C3 OS=Bos indicus x Bos taurus OX=30522 GN=C3 PE=4 SV=1 |           |           |        |       |     |      |      |         |                             |
|--------------------------------------------------------------------|-----------|-----------|--------|-------|-----|------|------|---------|-----------------------------|
| Observed                                                           | Mr(expt)  | Mr(calc)  | ppm    | Start | End | Miss | Ions | Peptide |                             |
| 845.4012                                                           | 844.3939  | 844.3927  | 1.50   | 511   | -   | 518  | 0    | ---     | R.TDPGEQAK.I                |
| 848.4952                                                           | 847.4879  | 847.4400  | 56.6   | 1422  | -   | 1429 | 0    | ---     | K.TLSTGVDR.Y                |
| 850.5135                                                           | 849.5062  | 849.4266  | 93.8   | 673   | -   | 679  | 0    | ---     | R.SVQLMEK.R + Oxidation (M) |
| 864.5186                                                           | 863.5113  | 863.4939  | 20.2   | 792   | -   | 798  | 0    | ---     | K.LMNVFLK.D                 |
| 987.5186                                                           | 986.5113  | 986.5396  | -28.69 | 1045  | -   | 1052 | 0    | ---     | R.QESLELIR.K                |
| 996.5623                                                           | 995.5550  | 995.4672  | 88.2   | 684   | -   | 692  | 0    | ---     | K.AGQYSSDLR.K               |
| 1083.5225                                                          | 1082.5152 | 1082.5509 | -32.98 | 1054  | -   | 1062 | 0    | 14      | K.GYTQQLAFR.Q               |
| 1083.5225                                                          | 1082.5152 | 1082.5509 | -32.94 | 1054  | -   | 1062 | 0    | ---     | K.GYTQQLAFR.Q               |
| 1090.4995                                                          | 1089.4922 | 1089.4873 | 4.50   | 624   | -   | 634  | 0    | ---     | K.ADIGCTPGSGR.N             |

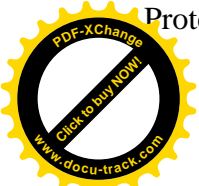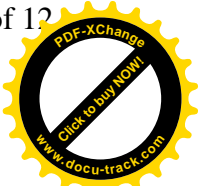

|                                                                                                                                                                                                                                                                                                                                                                                                                                                                                                                                                               |           |           |        |      |   |      |   |     |                             |
|---------------------------------------------------------------------------------------------------------------------------------------------------------------------------------------------------------------------------------------------------------------------------------------------------------------------------------------------------------------------------------------------------------------------------------------------------------------------------------------------------------------------------------------------------------------|-----------|-----------|--------|------|---|------|---|-----|-----------------------------|
| 1124.5784                                                                                                                                                                                                                                                                                                                                                                                                                                                                                                                                                     | 1123.5711 | 1123.5622 | 7.97   | 684  | - | 693  | 1 | --- | K.AGQYSSDLRK.C              |
| 1143.6165                                                                                                                                                                                                                                                                                                                                                                                                                                                                                                                                                     | 1142.6092 | 1142.6407 | -27.57 | 1044 | - | 1052 | 1 | --- | K.RQESLELIR.K               |
| 1162.5488                                                                                                                                                                                                                                                                                                                                                                                                                                                                                                                                                     | 1161.5415 | 1161.5666 | -21.61 | 1247 | - | 1256 | 0 | --- | K.DYDTPPVVR.W               |
| 1200.5436                                                                                                                                                                                                                                                                                                                                                                                                                                                                                                                                                     | 1199.5363 | 1199.5683 | -26.65 | 1220 | - | 1228 | 1 | --- | K.NRWEENPQK.L               |
| 1211.6163                                                                                                                                                                                                                                                                                                                                                                                                                                                                                                                                                     | 1210.6090 | 1210.6458 | -30.41 | 1053 | - | 1062 | 1 | --- | R.KGYTQQLAFR.Q              |
| 1211.6163                                                                                                                                                                                                                                                                                                                                                                                                                                                                                                                                                     | 1210.6091 | 1210.6458 | -30.39 | 1053 | - | 1062 | 1 | --- | R.KGYTQQLAFR.Q              |
| 1221.5270                                                                                                                                                                                                                                                                                                                                                                                                                                                                                                                                                     | 1220.5197 | 1220.5574 | -30.90 | 1174 | - | 1183 | 0 | 40  | K.AGDFLENHYR.E              |
| 1221.5270                                                                                                                                                                                                                                                                                                                                                                                                                                                                                                                                                     | 1220.5197 | 1220.5574 | -30.88 | 1174 | - | 1183 | 0 | --- | K.AGDFLENHYR.E              |
| 1290.6333                                                                                                                                                                                                                                                                                                                                                                                                                                                                                                                                                     | 1289.6260 | 1289.6616 | -27.57 | 1246 | - | 1256 | 1 | --- | R.KDYDTPPVVR.W              |
| 1361.6049                                                                                                                                                                                                                                                                                                                                                                                                                                                                                                                                                     | 1360.5976 | 1360.6405 | -31.51 | 1158 | - | 1169 | 0 | --- | K.DICEAQVNSLGR.S            |
| 1790.9982                                                                                                                                                                                                                                                                                                                                                                                                                                                                                                                                                     | 1789.9909 | 1790.0454 | -30.45 | 1187 | - | 1203 | 0 | --- | R.RPYTVIAAAYALALLGK.L       |
| 1790.9982                                                                                                                                                                                                                                                                                                                                                                                                                                                                                                                                                     | 1789.9909 | 1790.0454 | -30.43 | 1187 | - | 1203 | 0 | --- | R.RPYTVIAAAYALALLGK.L       |
| 1880.9891                                                                                                                                                                                                                                                                                                                                                                                                                                                                                                                                                     | 1879.9818 | 1880.0407 | -31.31 | 1229 | - | 1245 | 0 | --- | K.LYNVEATSYALLALLAR.K       |
| 1880.9891                                                                                                                                                                                                                                                                                                                                                                                                                                                                                                                                                     | 1879.9819 | 1880.0407 | -31.29 | 1229 | - | 1245 | 0 | 80  | K.LYNVEATSYALLALLAR.K       |
| 2157.0273                                                                                                                                                                                                                                                                                                                                                                                                                                                                                                                                                     | 2156.0200 | 2156.0783 | -27.04 | 982  | - | 1001 | 0 | --- | K.ILLQGTTPVAQMTEDAIDGER.L   |
| 2157.0273                                                                                                                                                                                                                                                                                                                                                                                                                                                                                                                                                     | 2156.0201 | 2156.0783 | -27.02 | 982  | - | 1001 | 0 | 35  | K.ILLQGTTPVAQMTEDAIDGER.L   |
| 2506.2144                                                                                                                                                                                                                                                                                                                                                                                                                                                                                                                                                     | 2505.2071 | 2505.2692 | -24.80 | 1065 | - | 1086 | 0 | --- | K.SSAYAFAQYRPPSTWLTAYVVK.V  |
| 2506.2144                                                                                                                                                                                                                                                                                                                                                                                                                                                                                                                                                     | 2505.2071 | 2505.2692 | -24.79 | 1065 | - | 1086 | 0 | --- | K.SSAYAFAQYRPPSTWLTAYVVK.V  |
| 2598.2195                                                                                                                                                                                                                                                                                                                                                                                                                                                                                                                                                     | 2597.2122 | 2597.2697 | -22.12 | 1114 | - | 1136 | 0 | --- | K.QKPDGIFQEDGPVIHQEMIGGFR.D |
| No match to: 842.4847, 853.4918, 857.4026, 857.4026, 868.5277, 870.5200, 882.5434, 882.5434, 951.5951, 1017.6425, 1019.6487, 1033.6698, 1036.5013, 1036.5013, 1045.5382, 1051.6785, 1051.6785, 1107.5156, 1131.6732, 1136.6610, 1151.6952, 1165.5533, 1165.7053, 1179.5667, 1263.6616, 1277.6742, 1300.8134, 1334.8459, 1334.8459, 1379.6898, 1407.6674, 1434.8688, 1448.8787, 1475.7053, 1479.7522, 1482.7051, 1567.6991, 1618.0178, 1732.0514, 1808.9220, 1879.9926, 1890.9176, 1901.2008, 1993.9156, 2064.0874, 2098.0544, 2179.9844, 2211.0493, 2283.1272 |           |           |        |      |   |      |   |     |                             |

10. [A0A4W2EPV7](#) Mass: 179159 Score: 231 Expect: 1.1e-018 Matches: 27

|                                                                                                                                                                                                                                                                                                                                                                                                                                                                                                                                                                          |           |           |        |       |     |      |      |         |                              |
|--------------------------------------------------------------------------------------------------------------------------------------------------------------------------------------------------------------------------------------------------------------------------------------------------------------------------------------------------------------------------------------------------------------------------------------------------------------------------------------------------------------------------------------------------------------------------|-----------|-----------|--------|-------|-----|------|------|---------|------------------------------|
| Complement C3 OS=Bos indicus x Bos taurus OX=30522 GN=C3 PE=4 SV=1                                                                                                                                                                                                                                                                                                                                                                                                                                                                                                       |           |           |        |       |     |      |      |         |                              |
| Observed                                                                                                                                                                                                                                                                                                                                                                                                                                                                                                                                                                 | Mr(expt)  | Mr(calc)  | ppm    | Start | End | Miss | Ions | Peptide |                              |
| 845.4012                                                                                                                                                                                                                                                                                                                                                                                                                                                                                                                                                                 | 844.3939  | 844.3927  | 1.50   | 477   | -   | 484  | 0    | ---     | R.TDPGEQAK.I                 |
| 848.4952                                                                                                                                                                                                                                                                                                                                                                                                                                                                                                                                                                 | 847.4879  | 847.4400  | 56.6   | 1355  | -   | 1362 | 0    | ---     | K.TLSTGVDR.Y                 |
| 850.5135                                                                                                                                                                                                                                                                                                                                                                                                                                                                                                                                                                 | 849.5062  | 849.4266  | 93.8   | 639   | -   | 645  | 0    | ---     | R.SVQLMEK.R + Oxidation (M)  |
| 864.5186                                                                                                                                                                                                                                                                                                                                                                                                                                                                                                                                                                 | 863.5113  | 863.4939  | 20.2   | 758   | -   | 764  | 0    | ---     | K.LMNVFLK.D                  |
| 987.5186                                                                                                                                                                                                                                                                                                                                                                                                                                                                                                                                                                 | 986.5113  | 986.5396  | -28.69 | 1011  | -   | 1018 | 0    | ---     | R.QESLELIR.K                 |
| 996.5623                                                                                                                                                                                                                                                                                                                                                                                                                                                                                                                                                                 | 995.5550  | 995.4672  | 88.2   | 650   | -   | 658  | 0    | ---     | K.AGQYSSDLR.K                |
| 1083.5225                                                                                                                                                                                                                                                                                                                                                                                                                                                                                                                                                                | 1082.5152 | 1082.5509 | -32.98 | 1020  | -   | 1028 | 0    | 14      | K.GYTQQLAFR.Q                |
| 1083.5225                                                                                                                                                                                                                                                                                                                                                                                                                                                                                                                                                                | 1082.5152 | 1082.5509 | -32.94 | 1020  | -   | 1028 | 0    | ---     | K.GYTQQLAFR.Q                |
| 1090.4995                                                                                                                                                                                                                                                                                                                                                                                                                                                                                                                                                                | 1089.4922 | 1089.4873 | 4.50   | 590   | -   | 600  | 0    | ---     | K.ADIGCTPGSGR.N              |
| 1124.5784                                                                                                                                                                                                                                                                                                                                                                                                                                                                                                                                                                | 1123.5711 | 1123.5622 | 7.97   | 650   | -   | 659  | 1    | ---     | K.AGQYSSDLRK.C               |
| 1143.6165                                                                                                                                                                                                                                                                                                                                                                                                                                                                                                                                                                | 1142.6092 | 1142.6407 | -27.57 | 1010  | -   | 1018 | 1    | ---     | K.RQESLELIR.K                |
| 1162.5488                                                                                                                                                                                                                                                                                                                                                                                                                                                                                                                                                                | 1161.5415 | 1161.5666 | -21.61 | 1180  | -   | 1189 | 0    | ---     | K.DYDTPPVVR.W                |
| 1200.5436                                                                                                                                                                                                                                                                                                                                                                                                                                                                                                                                                                | 1199.5363 | 1199.5683 | -26.65 | 1153  | -   | 1161 | 1    | ---     | K.NRWEENPQK.L                |
| 1211.6163                                                                                                                                                                                                                                                                                                                                                                                                                                                                                                                                                                | 1210.6090 | 1210.6458 | -30.41 | 1019  | -   | 1028 | 1    | ---     | R.KGYTQQLAFR.Q               |
| 1211.6163                                                                                                                                                                                                                                                                                                                                                                                                                                                                                                                                                                | 1210.6091 | 1210.6458 | -30.39 | 1019  | -   | 1028 | 1    | ---     | R.KGYTQQLAFR.Q               |
| 1221.5270                                                                                                                                                                                                                                                                                                                                                                                                                                                                                                                                                                | 1220.5197 | 1220.5574 | -30.90 | 1107  | -   | 1116 | 0    | 40      | K.AGDFLENHYR.E               |
| 1221.5270                                                                                                                                                                                                                                                                                                                                                                                                                                                                                                                                                                | 1220.5197 | 1220.5574 | -30.88 | 1107  | -   | 1116 | 0    | ---     | K.AGDFLENHYR.E               |
| 1290.6333                                                                                                                                                                                                                                                                                                                                                                                                                                                                                                                                                                | 1289.6260 | 1289.6616 | -27.57 | 1179  | -   | 1189 | 1    | ---     | R.KDYDTPPVVR.W               |
| 1790.9982                                                                                                                                                                                                                                                                                                                                                                                                                                                                                                                                                                | 1789.9909 | 1790.0454 | -30.45 | 1120  | -   | 1136 | 0    | ---     | R.RPYTVIAAAYALALLGK.L        |
| 1790.9982                                                                                                                                                                                                                                                                                                                                                                                                                                                                                                                                                                | 1789.9909 | 1790.0454 | -30.43 | 1120  | -   | 1136 | 0    | ---     | R.RPYTVIAAAYALALLGK.L        |
| 1880.9891                                                                                                                                                                                                                                                                                                                                                                                                                                                                                                                                                                | 1879.9818 | 1880.0407 | -31.31 | 1162  | -   | 1178 | 0    | ---     | K.LYNVEATSYALLALLAR.K        |
| 1880.9891                                                                                                                                                                                                                                                                                                                                                                                                                                                                                                                                                                | 1879.9819 | 1880.0407 | -31.29 | 1162  | -   | 1178 | 0    | 80      | K.LYNVEATSYALLALLAR.K        |
| 2157.0273                                                                                                                                                                                                                                                                                                                                                                                                                                                                                                                                                                | 2156.0200 | 2156.0783 | -27.04 | 948   | -   | 967  | 0    | ---     | K.ILLQGTTPVAQMTEDAIDGER.L    |
| 2157.0273                                                                                                                                                                                                                                                                                                                                                                                                                                                                                                                                                                | 2156.0201 | 2156.0783 | -27.02 | 948   | -   | 967  | 0    | 35      | K.ILLQGTTPVAQMTEDAIDGER.L    |
| 2506.2144                                                                                                                                                                                                                                                                                                                                                                                                                                                                                                                                                                | 2505.2071 | 2505.2692 | -24.80 | 1031  | -   | 1052 | 0    | ---     | K.SSAYAFAQYRPPSTWLTAYVVK.V   |
| 2506.2144                                                                                                                                                                                                                                                                                                                                                                                                                                                                                                                                                                | 2505.2071 | 2505.2692 | -24.79 | 1031  | -   | 1052 | 0    | ---     | K.SSAYAFAQYRPPSTWLTAYVVK.V   |
| 2598.2195                                                                                                                                                                                                                                                                                                                                                                                                                                                                                                                                                                | 2597.2122 | 2597.3085 | -37.09 | 601   | -   | 624  | 1    | ---     | R.NYAGVFTDAGLTSLKTSQLETQQR.A |
| No match to: 842.4847, 853.4918, 857.4026, 857.4026, 868.5277, 870.5200, 882.5434, 882.5434, 951.5951, 1017.6425, 1019.6487, 1033.6698, 1036.5013, 1036.5013, 1045.5382, 1051.6785, 1051.6785, 1107.5156, 1131.6732, 1136.6610, 1151.6952, 1165.5533, 1165.7053, 1179.5667, 1263.6616, 1277.6742, 1300.8134, 1334.8459, 1334.8459, 1361.6049, 1379.6898, 1407.6674, 1434.8688, 1448.8787, 1475.7053, 1479.7522, 1482.7051, 1567.6991, 1618.0178, 1732.0514, 1808.9220, 1879.9926, 1890.9176, 1901.2008, 1993.9156, 2064.0874, 2098.0544, 2179.9844, 2211.0493, 2283.1272 |           |           |        |       |     |      |      |         |                              |

11. [A0A4W2D406](#) Mass: 186684 Score: 231 Expect: 1.1e-018 Matches: 28

|                                                                    |           |           |        |       |     |      |      |         |                             |
|--------------------------------------------------------------------|-----------|-----------|--------|-------|-----|------|------|---------|-----------------------------|
| Complement C3 OS=Bos indicus x Bos taurus OX=30522 GN=C3 PE=4 SV=1 |           |           |        |       |     |      |      |         |                             |
| Observed                                                           | Mr(expt)  | Mr(calc)  | ppm    | Start | End | Miss | Ions | Peptide |                             |
| 845.4012                                                           | 844.3939  | 844.3927  | 1.50   | 511   | -   | 518  | 0    | ---     | R.TDPGEQAK.I                |
| 848.4952                                                           | 847.4879  | 847.4400  | 56.6   | 1422  | -   | 1429 | 0    | ---     | K.TLSTGVDR.Y                |
| 850.5135                                                           | 849.5062  | 849.4266  | 93.8   | 673   | -   | 679  | 0    | ---     | R.SVQLMEK.R + Oxidation (M) |
| 864.5186                                                           | 863.5113  | 863.4939  | 20.2   | 792   | -   | 798  | 0    | ---     | K.LMNVFLK.D                 |
| 987.5186                                                           | 986.5113  | 986.5396  | -28.69 | 1045  | -   | 1052 | 0    | ---     | R.QESLELIR.K                |
| 996.5623                                                           | 995.5550  | 995.4672  | 88.2   | 684   | -   | 692  | 0    | ---     | K.AGQYSSDLR.K               |
| 1083.5225                                                          | 1082.5152 | 1082.5509 | -32.98 | 1054  | -   | 1062 | 0    | 14      | K.GYTQQLAFR.Q               |
| 1083.5225                                                          | 1082.5152 | 1082.5509 | -32.94 | 1054  | -   | 1062 | 0    | ---     | K.GYTQQLAFR.Q               |
| 1090.4995                                                          | 1089.4922 | 1089.4873 | 4.50   | 624   | -   | 634  | 0    | ---     | K.ADIGCTPGSGR.N             |
| 1124.5784                                                          | 1123.5711 | 1123.5622 | 7.97   | 684   | -   | 693  | 1    | ---     | K.AGQYSSDLRK.C              |
| 1143.6165                                                          | 1142.6092 | 1142.6407 | -27.57 | 1044  | -   | 1052 | 1    | ---     | K.RQESLELIR.K               |
| 1162.5488                                                          | 1161.5415 | 1161.5666 | -21.61 | 1247  | -   | 1256 | 0    | ---     | K.DYDTPPVVR.W               |
| 1200.5436                                                          | 1199.5363 | 1199.5683 | -26.65 | 1220  | -   | 1228 | 1    | ---     | K.NRWEENPQK.L               |
| 1211.6163                                                          | 1210.6090 | 1210.6458 | -30.41 | 1053  | -   | 1062 | 1    | ---     | R.KGYTQQLAFR.Q              |
| 1211.6163                                                          | 1210.6091 | 1210.6458 | -30.39 | 1053  | -   | 1062 | 1    | ---     | R.KGYTQQLAFR.Q              |
| 1221.5270                                                          | 1220.5197 | 1220.5574 | -30.90 | 1174  | -   | 1183 | 0    | 40      | K.AGDFLENHYR.E              |
| 1221.5270                                                          | 1220.5197 | 1220.5574 | -30.88 | 1174  | -   | 1183 | 0    | ---     | K.AGDFLENHYR.E              |
| 1290.6333                                                          | 1289.6260 | 1289.6616 | -27.57 | 1246  | -   | 1256 | 1    | ---     | R.KDYDTPPVVR.W              |
| 1361.6049                                                          | 1360.5976 | 1360.6405 | -31.51 | 1158  | -   | 1169 | 0    | ---     | K.DICEAQVNSLGR.S            |
| 1790.9982                                                          | 1789.9909 | 1790.0454 | -30.45 | 1187  | -   | 1203 | 0    | ---     | R.RPYTVIAAAYALALLGK.L       |
| 1790.9982                                                          | 1789.9909 | 1790.0454 | -30.43 | 1187  | -   | 1203 | 0    | ---     | R.RPYTVIAAAYALALLGK.L       |
| 1880.9891                                                          | 1879.9818 | 1880.0407 | -31.31 | 1229  | -   | 1245 | 0    | ---     | K.LYNVEATSYALLALLAR.K       |
| 1880.9891                                                          | 1879.9819 | 1880.0407 | -31.29 | 1229  | -   | 1245 | 0    | 80      | K.LYNVEATSYALLALLAR.K       |
| 2157.0273                                                          | 2156.0200 | 2156.0783 | -27.04 | 982   | -   | 1001 | 0    | ---     | K.ILLQGTTPVAQMTEDAIDGER.L   |
| 2157.0273                                                          | 2156.0201 | 2156.0783 | -27.02 | 982   | -   | 1001 | 0    | 35      | K.ILLQGTTPVAQMTEDAIDGER.L   |
| 2506.2144                                                          | 2505.2071 | 2505.2692 | -24.80 | 1065  | -   | 1086 | 0    | ---     | K.SSAYAFAQYRPPSTWLTAYVVK.V  |
| 2506.2144                                                          | 2505.2071 | 2505.2692 | -24.79 | 1065  | -   | 1086 | 0    | ---     | K.SSAYAFAQYRPPSTWLTAYVVK.V  |
| 2598.2195                                                          | 2597.2122 | 2597.2697 | -22.12 | 1114  | -   | 1136 | 0    | ---     | K.QKPDGIFQEDGPVIHQEMIGGFR.D |



No match to: 842.4847, 853.4918, 857.4026, 857.4026, 868.5277, 870.5200, 882.5434, 882.5434, 951.5951, 1017.6425, 1019.6487, 1033.6698, 1036.5013, 1036.5013, 1045.5382, 1051.6785, 1051.6785, 1107.5156, 1131.6732, 1136.6610, 1151.6952, 1165.5533, 1165.7053, 1179.5667, 1263.6616, 1277.6742, 1300.8134, 1334.8459, 1334.8459, 1379.6898, 1407.6674, 1434.8688, 1448.8787, 1475.7053, 1479.7522, 1482.7051, 1567.6991, 1618.0178, 1732.0514, 1808.9220, 1879.9926, 1890.9176, 1901.2008, 1993.9156, 2064.0874, 2098.0544, 2179.9844, 2211.0493, 2283.1272

12. A0A4W2D411 Mass: 190190 Score: 230 Expect: 1.3e-018 Matches: 28

Complement C3 OS=Bos indicus x Bos taurus OX=30522 GN=C3 PE=4 SV=1

| Observed  | Mr (expt) | Mr (calc) | ppm    | Start | End  | Miss | Ions | Peptide                     |
|-----------|-----------|-----------|--------|-------|------|------|------|-----------------------------|
| 845.4012  | 844.3939  | 844.3927  | 1.50   | 511   | 518  | 0    | ---  | R.TDPGEQAK.I                |
| 848.4952  | 847.4879  | 847.4400  | 56.6   | 1453  | 1460 | 0    | ---  | K.TLSTGVDR.Y                |
| 850.5135  | 849.5062  | 849.4266  | 93.8   | 704   | 710  | 0    | ---  | R.SVQLMEK.R + Oxidation (M) |
| 864.5186  | 863.5113  | 863.4939  | 20.2   | 823   | 829  | 0    | ---  | K.LMNVFLK.D                 |
| 987.5186  | 986.5113  | 986.5396  | -28.69 | 1076  | 1083 | 0    | ---  | R.QESLELIR.K                |
| 996.5623  | 995.5550  | 995.4672  | 88.2   | 715   | 723  | 0    | ---  | K.AGQYSSDLR.K               |
| 1083.5225 | 1082.5152 | 1082.5509 | -32.98 | 1085  | 1093 | 0    | 14   | K.GYTQQLAFR.Q               |
| 1083.5225 | 1082.5152 | 1082.5509 | -32.94 | 1085  | 1093 | 0    | ---  | K.GYTQQLAFR.Q               |
| 1090.4995 | 1089.4922 | 1089.4873 | 4.50   | 655   | 665  | 0    | ---  | K.ADIGCTPGSGR.N             |
| 1124.5784 | 1123.5711 | 1123.5622 | 7.97   | 715   | 724  | 1    | ---  | K.AGQYSSDLRK.C              |
| 1143.6165 | 1142.6092 | 1142.6407 | -27.57 | 1075  | 1083 | 1    | ---  | K.RQESLELIR.K               |
| 1162.5488 | 1161.5415 | 1161.5666 | -21.61 | 1278  | 1287 | 0    | ---  | K.DYDTTPPVVR.W              |
| 1200.5436 | 1199.5363 | 1199.5683 | -26.65 | 1251  | 1259 | 1    | ---  | K.NRWEEPNQK.L               |
| 1211.6163 | 1210.6090 | 1210.6458 | -30.41 | 1084  | 1093 | 1    | ---  | R.KGYTQQLAFR.Q              |
| 1211.6163 | 1210.6091 | 1210.6458 | -30.39 | 1084  | 1093 | 1    | ---  | R.KGYTQQLAFR.Q              |
| 1221.5270 | 1220.5197 | 1220.5574 | -30.90 | 1205  | 1214 | 0    | 40   | K.AGDFLENHYR.E              |
| 1221.5270 | 1220.5197 | 1220.5574 | -30.88 | 1205  | 1214 | 0    | ---  | K.AGDFLENHYR.E              |
| 1290.6333 | 1289.6260 | 1289.6616 | -27.57 | 1277  | 1287 | 1    | ---  | R.KDYDTTPPVVR.W             |
| 1361.6049 | 1360.5976 | 1360.6405 | -31.51 | 1189  | 1200 | 0    | ---  | K.DICEAQNLSGR.S             |
| 1790.9982 | 1789.9909 | 1790.0454 | -30.45 | 1218  | 1234 | 0    | ---  | R.RPYTVIAAAYALALLGK.L       |
| 1790.9982 | 1789.9909 | 1790.0454 | -30.43 | 1218  | 1234 | 0    | ---  | R.RPYTVIAAAYALALLGK.L       |
| 1880.9891 | 1879.9818 | 1880.0407 | -31.31 | 1260  | 1276 | 0    | ---  | K.LYNVEATSYALLALLAR.K       |
| 1880.9891 | 1879.9819 | 1880.0407 | -31.29 | 1260  | 1276 | 0    | 80   | K.LYNVEATSYALLALLAR.K       |
| 2157.0273 | 2156.0200 | 2156.0783 | -27.04 | 1013  | 1032 | 0    | ---  | K.ILLQGTTPVQMTEAIDGER.L     |
| 2157.0273 | 2156.0201 | 2156.0783 | -27.02 | 1013  | 1032 | 0    | 35   | K.ILLQGTTPVQMTEAIDGER.L     |
| 2506.2144 | 2505.2071 | 2505.2692 | -24.80 | 1096  | 1117 | 0    | ---  | K.SSAYAAFPYRPPSTWLTAYVVK.V  |
| 2506.2144 | 2505.2071 | 2505.2692 | -24.79 | 1096  | 1117 | 0    | ---  | K.SSAYAAFPYRPPSTWLTAYVVK.V  |
| 2598.2195 | 2597.2122 | 2597.2697 | -22.12 | 1145  | 1167 | 0    | ---  | K.QKPDGIFQEDGPVIHQEMIGGFR.D |

No match to: 842.4847, 853.4918, 857.4026, 857.4026, 868.5277, 870.5200, 882.5434, 882.5434, 951.5951, 1017.6425, 1019.6487, 1033.6698, 1036.5013, 1036.5013, 1045.5382, 1051.6785, 1051.6785, 1107.5156, 1131.6732, 1136.6610, 1151.6952, 1165.5533, 1165.7053, 1179.5667, 1263.6616, 1277.6742, 1300.8134, 1334.8459, 1334.8459, 1379.6898, 1407.6674, 1434.8688, 1448.8787, 1475.7053, 1479.7522, 1482.7051, 1567.6991, 1618.0178, 1732.0514, 1808.9220, 1879.9926, 1890.9176, 1901.2008, 1993.9156, 2064.0874, 2098.0544, 2179.9844, 2211.0493, 2283.1272

13. A0A4W2CZN6 Mass: 192486 Score: 229 Expect: 1.7e-018 Matches: 28

Complement C3 OS=Bos indicus x Bos taurus OX=30522 GN=C3 PE=4 SV=1

| Observed  | Mr (expt) | Mr (calc) | ppm    | Start | End  | Miss | Ions | Peptide                     |
|-----------|-----------|-----------|--------|-------|------|------|------|-----------------------------|
| 845.4012  | 844.3939  | 844.3927  | 1.50   | 511   | 518  | 0    | ---  | R.TDPGEQAK.I                |
| 848.4952  | 847.4879  | 847.4400  | 56.6   | 1453  | 1460 | 0    | ---  | K.TLSTGVDR.Y                |
| 850.5135  | 849.5062  | 849.4266  | 93.8   | 704   | 710  | 0    | ---  | R.SVQLMEK.R + Oxidation (M) |
| 864.5186  | 863.5113  | 863.4939  | 20.2   | 823   | 829  | 0    | ---  | K.LMNVFLK.D                 |
| 987.5186  | 986.5113  | 986.5396  | -28.69 | 1076  | 1083 | 0    | ---  | R.QESLELIR.K                |
| 996.5623  | 995.5550  | 995.4672  | 88.2   | 715   | 723  | 0    | ---  | K.AGQYSSDLR.K               |
| 1083.5225 | 1082.5152 | 1082.5509 | -32.98 | 1085  | 1093 | 0    | 14   | K.GYTQQLAFR.Q               |
| 1083.5225 | 1082.5152 | 1082.5509 | -32.94 | 1085  | 1093 | 0    | ---  | K.GYTQQLAFR.Q               |
| 1090.4995 | 1089.4922 | 1089.4873 | 4.50   | 655   | 665  | 0    | ---  | K.ADIGCTPGSGR.N             |
| 1124.5784 | 1123.5711 | 1123.5622 | 7.97   | 715   | 724  | 1    | ---  | K.AGQYSSDLRK.C              |
| 1143.6165 | 1142.6092 | 1142.6407 | -27.57 | 1075  | 1083 | 1    | ---  | K.RQESLELIR.K               |
| 1162.5488 | 1161.5415 | 1161.5666 | -21.61 | 1278  | 1287 | 0    | ---  | K.DYDTTPPVVR.W              |
| 1200.5436 | 1199.5363 | 1199.5683 | -26.65 | 1251  | 1259 | 1    | ---  | K.NRWEEPNQK.L               |
| 1211.6163 | 1210.6090 | 1210.6458 | -30.41 | 1084  | 1093 | 1    | ---  | R.KGYTQQLAFR.Q              |
| 1211.6163 | 1210.6091 | 1210.6458 | -30.39 | 1084  | 1093 | 1    | ---  | R.KGYTQQLAFR.Q              |
| 1221.5270 | 1220.5197 | 1220.5574 | -30.90 | 1205  | 1214 | 0    | 40   | K.AGDFLENHYR.E              |
| 1221.5270 | 1220.5197 | 1220.5574 | -30.88 | 1205  | 1214 | 0    | ---  | K.AGDFLENHYR.E              |
| 1290.6333 | 1289.6260 | 1289.6616 | -27.57 | 1277  | 1287 | 1    | ---  | R.KDYDTTPPVVR.W             |
| 1361.6049 | 1360.5976 | 1360.6405 | -31.51 | 1189  | 1200 | 0    | ---  | K.DICEAQNLSGR.S             |
| 1790.9982 | 1789.9909 | 1790.0454 | -30.45 | 1218  | 1234 | 0    | ---  | R.RPYTVIAAAYALALLGK.L       |
| 1790.9982 | 1789.9909 | 1790.0454 | -30.43 | 1218  | 1234 | 0    | ---  | R.RPYTVIAAAYALALLGK.L       |
| 1880.9891 | 1879.9818 | 1880.0407 | -31.31 | 1260  | 1276 | 0    | ---  | K.LYNVEATSYALLALLAR.K       |
| 1880.9891 | 1879.9819 | 1880.0407 | -31.29 | 1260  | 1276 | 0    | 80   | K.LYNVEATSYALLALLAR.K       |
| 2157.0273 | 2156.0200 | 2156.0783 | -27.04 | 1013  | 1032 | 0    | ---  | K.ILLQGTTPVQMTEAIDGER.L     |
| 2157.0273 | 2156.0201 | 2156.0783 | -27.02 | 1013  | 1032 | 0    | 35   | K.ILLQGTTPVQMTEAIDGER.L     |
| 2506.2144 | 2505.2071 | 2505.2692 | -24.80 | 1096  | 1117 | 0    | ---  | K.SSAYAAFPYRPPSTWLTAYVVK.V  |
| 2506.2144 | 2505.2071 | 2505.2692 | -24.79 | 1096  | 1117 | 0    | ---  | K.SSAYAAFPYRPPSTWLTAYVVK.V  |
| 2598.2195 | 2597.2122 | 2597.2697 | -22.12 | 1145  | 1167 | 0    | ---  | K.QKPDGIFQEDGPVIHQEMIGGFR.D |

No match to: 842.4847, 853.4918, 857.4026, 857.4026, 868.5277, 870.5200, 882.5434, 882.5434, 951.5951, 1017.6425, 1019.6487, 1033.6698, 1036.5013, 1036.5013, 1045.5382, 1051.6785, 1051.6785, 1107.5156, 1131.6732, 1136.6610, 1151.6952, 1165.5533, 1165.7053, 1179.5667, 1263.6616, 1277.6742, 1300.8134, 1334.8459, 1334.8459, 1379.6898, 1407.6674, 1434.8688, 1448.8787, 1475.7053, 1479.7522, 1482.7051, 1567.6991, 1618.0178, 1732.0514, 1808.9220, 1879.9926, 1890.9176, 1901.2008, 1993.9156, 2064.0874, 2098.0544, 2179.9844, 2211.0493, 2283.1272

14. A0A4W2EPI5 Mass: 182918 Score: 229 Expect: 1.7e-018 Matches: 27

Complement C3 OS=Bos indicus x Bos taurus OX=30522 GN=C3 PE=4 SV=1

| Observed  | Mr (expt) | Mr (calc) | ppm    | Start | End  | Miss | Ions | Peptide                     |
|-----------|-----------|-----------|--------|-------|------|------|------|-----------------------------|
| 845.4012  | 844.3939  | 844.3927  | 1.50   | 477   | 484  | 0    | ---  | R.TDPGEQAK.I                |
| 850.5135  | 849.5062  | 849.4266  | 93.8   | 670   | 676  | 0    | ---  | R.SVQLMEK.R + Oxidation (M) |
| 864.5186  | 863.5113  | 863.4939  | 20.2   | 789   | 795  | 0    | ---  | K.LMNVFLK.D                 |
| 987.5186  | 986.5113  | 986.5396  | -28.69 | 1042  | 1049 | 0    | ---  | R.QESLELIR.K                |
| 996.5623  | 995.5550  | 995.4672  | 88.2   | 681   | 689  | 0    | ---  | K.AGQYSSDLR.K               |
| 1083.5225 | 1082.5152 | 1082.5509 | -32.98 | 1051  | 1059 | 0    | 14   | K.GYTQQLAFR.Q               |
| 1083.5225 | 1082.5152 | 1082.5509 | -32.94 | 1051  | 1059 | 0    | ---  | K.GYTQQLAFR.Q               |
| 1090.4995 | 1089.4922 | 1089.4873 | 4.50   | 621   | 631  | 0    | ---  | K.ADIGCTPGSGR.N             |
| 1124.5784 | 1123.5711 | 1123.5622 | 7.97   | 681   | 690  | 1    | ---  | K.AGQYSSDLRK.C              |
| 1143.6165 | 1142.6092 | 1142.6407 | -27.57 | 1041  | 1049 | 1    | ---  | K.RQESLELIR.K               |
| 1162.5488 | 1161.5415 | 1161.5666 | -21.61 | 1244  | 1253 | 0    | ---  | K.DYDTTPPVVR.W              |

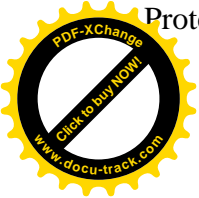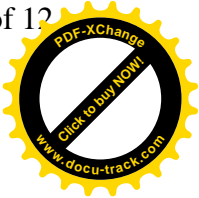

|                                                                                                                                                                                                                                                                                                                                                                                                                                                                                                                                                                                               |           |           |        |      |   |      |   |     |                            |
|-----------------------------------------------------------------------------------------------------------------------------------------------------------------------------------------------------------------------------------------------------------------------------------------------------------------------------------------------------------------------------------------------------------------------------------------------------------------------------------------------------------------------------------------------------------------------------------------------|-----------|-----------|--------|------|---|------|---|-----|----------------------------|
| 1200.5436                                                                                                                                                                                                                                                                                                                                                                                                                                                                                                                                                                                     | 1199.5363 | 1199.5683 | -26.65 | 1217 | - | 1225 | 1 | --- | K.NRWEENPK.L               |
| 1211.6163                                                                                                                                                                                                                                                                                                                                                                                                                                                                                                                                                                                     | 1210.6090 | 1210.6458 | -30.41 | 1050 | - | 1059 | 1 | --- | R.KGYTQQLAFR.Q             |
| 1211.6163                                                                                                                                                                                                                                                                                                                                                                                                                                                                                                                                                                                     | 1210.6091 | 1210.6458 | -30.39 | 1050 | - | 1059 | 1 | --- | R.KGYTQQLAFR.Q             |
| 1221.5270                                                                                                                                                                                                                                                                                                                                                                                                                                                                                                                                                                                     | 1220.5197 | 1220.5574 | -30.90 | 1171 | - | 1180 | 0 | 40  | K.AGDFLENHYR.E             |
| 1221.5270                                                                                                                                                                                                                                                                                                                                                                                                                                                                                                                                                                                     | 1220.5197 | 1220.5574 | -30.88 | 1171 | - | 1180 | 0 | --- | K.AGDFLENHYR.E             |
| 1290.6333                                                                                                                                                                                                                                                                                                                                                                                                                                                                                                                                                                                     | 1289.6260 | 1289.6616 | -27.57 | 1243 | - | 1253 | 1 | --- | R.KDYDTTPPVVR.W            |
| 1361.6049                                                                                                                                                                                                                                                                                                                                                                                                                                                                                                                                                                                     | 1360.5976 | 1360.6405 | -31.51 | 1155 | - | 1166 | 0 | --- | K.DICEAQVNSLGR.S           |
| 1790.9982                                                                                                                                                                                                                                                                                                                                                                                                                                                                                                                                                                                     | 1789.9909 | 1790.0454 | -30.45 | 1184 | - | 1200 | 0 | --- | R.RPYTVIAAAYALALLGK.L      |
| 1790.9982                                                                                                                                                                                                                                                                                                                                                                                                                                                                                                                                                                                     | 1789.9909 | 1790.0454 | -30.43 | 1184 | - | 1200 | 0 | --- | R.RPYTVIAAAYALALLGK.L      |
| 1880.9891                                                                                                                                                                                                                                                                                                                                                                                                                                                                                                                                                                                     | 1879.9818 | 1880.0407 | -31.31 | 1226 | - | 1242 | 0 | --- | K.LYNVEATSYALLALLAR.K      |
| 1880.9891                                                                                                                                                                                                                                                                                                                                                                                                                                                                                                                                                                                     | 1879.9819 | 1880.0407 | -31.29 | 1226 | - | 1242 | 0 | 80  | K.LYNVEATSYALLALLAR.K      |
| 2157.0273                                                                                                                                                                                                                                                                                                                                                                                                                                                                                                                                                                                     | 2156.0200 | 2156.0783 | -27.04 | 979  | - | 998  | 0 | --- | K.ILLQGTTPVAQMTEDAIDGER.L  |
| 2157.0273                                                                                                                                                                                                                                                                                                                                                                                                                                                                                                                                                                                     | 2156.0201 | 2156.0783 | -27.02 | 979  | - | 998  | 0 | 35  | K.ILLQGTTPVAQMTEDAIDGER.L  |
| 2506.2144                                                                                                                                                                                                                                                                                                                                                                                                                                                                                                                                                                                     | 2505.2071 | 2505.2692 | -24.80 | 1062 | - | 1083 | 0 | --- | K.SSAYAAFYRPPSTWLTAYVVK.V  |
| 2506.2144                                                                                                                                                                                                                                                                                                                                                                                                                                                                                                                                                                                     | 2505.2071 | 2505.2692 | -24.79 | 1062 | - | 1083 | 0 | --- | K.SSAYAAFYRPPSTWLTAYVVK.V  |
| 2598.2195                                                                                                                                                                                                                                                                                                                                                                                                                                                                                                                                                                                     | 2597.2122 | 2597.2697 | -22.12 | 1111 | - | 1133 | 0 | --- | K.QKPDGIFQEDGPIHQEMIGGFR.D |
| No match to: 842.4847, 848.4952, 853.4918, 857.4026, 857.4026, 868.5277, 870.5200, 882.5434, 882.5434, 951.5951, 1017.6425, 1019.6487, 1033.6698, 1036.5013, 1036.5013, 1045.5382, 1051.6785, 1051.6785, 1107.5156, 1107.5156, 1131.6732, 1131.6732, 1136.6610, 1151.6952, 1165.5533, 1165.7053, 1179.5667, 1263.6616, 1277.6742, 1300.8134, 1334.8459, 1334.8459, 1379.6898, 1407.6674, 1434.8688, 1448.8787, 1475.7053, 1479.7522, 1482.7051, 1567.6991, 1618.0178, 1732.0514, 1808.9220, 1879.9926, 1890.9176, 1901.2008, 1993.9156, 2064.0874, 2098.0544, 2179.9844, 2211.0493, 2283.1272 |           |           |        |      |   |      |   |     |                            |

15. A0A4W2HFJ5 Mass: 188690 Score: 98 Expect: 2.3e-005 Matches: 24

|                                                                                                                                                                                                                                                                                                                                                                                                                                                                                                                                                                                                           |           |           |        |       |     |      |      |         |                             |
|-----------------------------------------------------------------------------------------------------------------------------------------------------------------------------------------------------------------------------------------------------------------------------------------------------------------------------------------------------------------------------------------------------------------------------------------------------------------------------------------------------------------------------------------------------------------------------------------------------------|-----------|-----------|--------|-------|-----|------|------|---------|-----------------------------|
| Complement C3 OS=Bos indicus x Bos taurus OX=30522 GN=C3 PE=4 SV=1                                                                                                                                                                                                                                                                                                                                                                                                                                                                                                                                        |           |           |        |       |     |      |      |         |                             |
| Observed                                                                                                                                                                                                                                                                                                                                                                                                                                                                                                                                                                                                  | Mr(expt)  | Mr(calc)  | ppm    | Start | End | Miss | Ions | Peptide |                             |
| 845.4012                                                                                                                                                                                                                                                                                                                                                                                                                                                                                                                                                                                                  | 844.3939  | 844.3927  | 1.50   | 477   | -   | 484  | 0    | ---     | R.TDPGEQAK.I                |
| 848.4952                                                                                                                                                                                                                                                                                                                                                                                                                                                                                                                                                                                                  | 847.4879  | 847.4400  | 56.6   | 1419  | -   | 1426 | 0    | ---     | K.TLSTGVDR.Y                |
| 850.5135                                                                                                                                                                                                                                                                                                                                                                                                                                                                                                                                                                                                  | 849.5062  | 849.4266  | 93.8   | 670   | -   | 676  | 0    | ---     | R.SVQLMEK.R + Oxidation (M) |
| 864.5186                                                                                                                                                                                                                                                                                                                                                                                                                                                                                                                                                                                                  | 863.5113  | 863.4939  | 20.2   | 789   | -   | 795  | 0    | ---     | K.LMNVFLK.D                 |
| 987.5186                                                                                                                                                                                                                                                                                                                                                                                                                                                                                                                                                                                                  | 986.5113  | 986.5396  | -28.69 | 1042  | -   | 1049 | 0    | ---     | R.QESLELIR.K                |
| 996.5623                                                                                                                                                                                                                                                                                                                                                                                                                                                                                                                                                                                                  | 995.5550  | 995.4672  | 88.2   | 681   | -   | 689  | 0    | ---     | K.AQYSSDLR.K                |
| 1083.5225                                                                                                                                                                                                                                                                                                                                                                                                                                                                                                                                                                                                 | 1082.5152 | 1082.5509 | -32.98 | 1051  | -   | 1059 | 0    | 14      | K.GYTQQLAFR.Q               |
| 1083.5225                                                                                                                                                                                                                                                                                                                                                                                                                                                                                                                                                                                                 | 1082.5152 | 1082.5509 | -32.94 | 1051  | -   | 1059 | 0    | ---     | K.GYTQQLAFR.Q               |
| 1090.4995                                                                                                                                                                                                                                                                                                                                                                                                                                                                                                                                                                                                 | 1089.4922 | 1089.4873 | 4.50   | 621   | -   | 631  | 0    | ---     | K.ADIGCTPGSGR.N             |
| 1124.5784                                                                                                                                                                                                                                                                                                                                                                                                                                                                                                                                                                                                 | 1123.5711 | 1123.5622 | 7.97   | 681   | -   | 690  | 1    | ---     | K.AQYSSDLRK.C               |
| 1143.6165                                                                                                                                                                                                                                                                                                                                                                                                                                                                                                                                                                                                 | 1142.6092 | 1142.6407 | -27.57 | 1041  | -   | 1049 | 1    | ---     | K.RQESLELIR.K               |
| 1162.5488                                                                                                                                                                                                                                                                                                                                                                                                                                                                                                                                                                                                 | 1161.5415 | 1161.5666 | -21.61 | 1244  | -   | 1253 | 0    | ---     | K.DYDTTPPVVR.W              |
| 1200.5436                                                                                                                                                                                                                                                                                                                                                                                                                                                                                                                                                                                                 | 1199.5363 | 1199.5683 | -26.65 | 1217  | -   | 1225 | 1    | ---     | K.NRWEENPK.L                |
| 1211.6163                                                                                                                                                                                                                                                                                                                                                                                                                                                                                                                                                                                                 | 1210.6090 | 1210.6458 | -30.41 | 1050  | -   | 1059 | 1    | ---     | R.KGYTQQLAFR.Q              |
| 1211.6163                                                                                                                                                                                                                                                                                                                                                                                                                                                                                                                                                                                                 | 1210.6091 | 1210.6458 | -30.39 | 1050  | -   | 1059 | 1    | ---     | R.KGYTQQLAFR.Q              |
| 1290.6333                                                                                                                                                                                                                                                                                                                                                                                                                                                                                                                                                                                                 | 1289.6260 | 1289.6616 | -27.57 | 1243  | -   | 1253 | 1    | ---     | R.KDYDTTPPVVR.W             |
| 1361.6049                                                                                                                                                                                                                                                                                                                                                                                                                                                                                                                                                                                                 | 1360.5976 | 1360.6405 | -31.51 | 1155  | -   | 1166 | 0    | ---     | K.DICEAQVNSLGR.S            |
| 1790.9982                                                                                                                                                                                                                                                                                                                                                                                                                                                                                                                                                                                                 | 1789.9909 | 1790.0454 | -30.45 | 1184  | -   | 1200 | 0    | ---     | R.RPYTVIAAAYALALLGK.L       |
| 1790.9982                                                                                                                                                                                                                                                                                                                                                                                                                                                                                                                                                                                                 | 1789.9909 | 1790.0454 | -30.43 | 1184  | -   | 1200 | 0    | ---     | R.RPYTVIAAAYALALLGK.L       |
| 2157.0273                                                                                                                                                                                                                                                                                                                                                                                                                                                                                                                                                                                                 | 2156.0200 | 2156.0783 | -27.04 | 979   | -   | 998  | 0    | ---     | K.ILLQGTTPVAQMTEDAIDGER.L   |
| 2157.0273                                                                                                                                                                                                                                                                                                                                                                                                                                                                                                                                                                                                 | 2156.0201 | 2156.0783 | -27.02 | 979   | -   | 998  | 0    | 35      | K.ILLQGTTPVAQMTEDAIDGER.L   |
| 2506.2144                                                                                                                                                                                                                                                                                                                                                                                                                                                                                                                                                                                                 | 2505.2071 | 2505.2692 | -24.80 | 1062  | -   | 1083 | 0    | ---     | K.SSAYAAFYRPPSTWLTAYVVK.V   |
| 2506.2144                                                                                                                                                                                                                                                                                                                                                                                                                                                                                                                                                                                                 | 2505.2071 | 2505.2692 | -24.79 | 1062  | -   | 1083 | 0    | ---     | K.SSAYAAFYRPPSTWLTAYVVK.V   |
| 2598.2195                                                                                                                                                                                                                                                                                                                                                                                                                                                                                                                                                                                                 | 2597.2122 | 2597.2697 | -22.12 | 1111  | -   | 1133 | 0    | ---     | K.QKPDGIFQEDGPIHQEMIGGFR.D  |
| No match to: 842.4847, 853.4918, 857.4026, 857.4026, 868.5277, 870.5200, 882.5434, 882.5434, 951.5951, 1017.6425, 1019.6487, 1033.6698, 1036.5013, 1036.5013, 1045.5382, 1051.6785, 1051.6785, 1107.5156, 1131.6732, 1136.6610, 1151.6952, 1165.5533, 1165.7053, 1179.5667, 1221.5270, 1221.5270, 1263.6616, 1277.6742, 1300.8134, 1334.8459, 1334.8459, 1379.6898, 1407.6674, 1434.8688, 1448.8787, 1475.7053, 1479.7522, 1482.7051, 1567.6991, 1618.0178, 1732.0514, 1808.9220, 1879.9926, 1880.9891, 1880.9891, 1890.9176, 1901.2008, 1993.9156, 2064.0874, 2098.0544, 2179.9844, 2211.0493, 2283.1272 |           |           |        |       |     |      |      |         |                             |

16. A0A4W2CZQ8 Mass: 170639 Score: 79 Expect: 0.0019 Matches: 18

|                                                                                                                                                                                                                                                                                                                                                                                                                                                                                                                                                                                                                                                                             |           |           |        |       |     |      |      |         |                             |
|-----------------------------------------------------------------------------------------------------------------------------------------------------------------------------------------------------------------------------------------------------------------------------------------------------------------------------------------------------------------------------------------------------------------------------------------------------------------------------------------------------------------------------------------------------------------------------------------------------------------------------------------------------------------------------|-----------|-----------|--------|-------|-----|------|------|---------|-----------------------------|
| Complement C3 OS=Bos indicus x Bos taurus OX=30522 GN=C3 PE=4 SV=1                                                                                                                                                                                                                                                                                                                                                                                                                                                                                                                                                                                                          |           |           |        |       |     |      |      |         |                             |
| Observed                                                                                                                                                                                                                                                                                                                                                                                                                                                                                                                                                                                                                                                                    | Mr(expt)  | Mr(calc)  | ppm    | Start | End | Miss | Ions | Peptide |                             |
| 845.4012                                                                                                                                                                                                                                                                                                                                                                                                                                                                                                                                                                                                                                                                    | 844.3939  | 844.3927  | 1.50   | 477   | -   | 484  | 0    | ---     | R.TDPGEQAK.I                |
| 848.4952                                                                                                                                                                                                                                                                                                                                                                                                                                                                                                                                                                                                                                                                    | 847.4879  | 847.4400  | 56.6   | 1281  | -   | 1288 | 0    | ---     | K.TLSTGVDR.Y                |
| 850.5135                                                                                                                                                                                                                                                                                                                                                                                                                                                                                                                                                                                                                                                                    | 849.5062  | 849.4266  | 93.8   | 639   | -   | 645  | 0    | ---     | R.SVQLMEK.R + Oxidation (M) |
| 864.5186                                                                                                                                                                                                                                                                                                                                                                                                                                                                                                                                                                                                                                                                    | 863.5113  | 863.4939  | 20.2   | 758   | -   | 764  | 0    | ---     | K.LMNVFLK.D                 |
| 987.5186                                                                                                                                                                                                                                                                                                                                                                                                                                                                                                                                                                                                                                                                    | 986.5113  | 986.5396  | -28.69 | 1011  | -   | 1018 | 0    | ---     | R.QESLELIR.K                |
| 996.5623                                                                                                                                                                                                                                                                                                                                                                                                                                                                                                                                                                                                                                                                    | 995.5550  | 995.4672  | 88.2   | 650   | -   | 658  | 0    | ---     | K.AQYSSDLR.K                |
| 1083.5225                                                                                                                                                                                                                                                                                                                                                                                                                                                                                                                                                                                                                                                                   | 1082.5152 | 1082.5509 | -32.98 | 1020  | -   | 1028 | 0    | 14      | K.GYTQQLAFR.Q               |
| 1083.5225                                                                                                                                                                                                                                                                                                                                                                                                                                                                                                                                                                                                                                                                   | 1082.5152 | 1082.5509 | -32.94 | 1020  | -   | 1028 | 0    | ---     | K.GYTQQLAFR.Q               |
| 1090.4995                                                                                                                                                                                                                                                                                                                                                                                                                                                                                                                                                                                                                                                                   | 1089.4922 | 1089.4873 | 4.50   | 590   | -   | 600  | 0    | ---     | K.ADIGCTPGSGR.N             |
| 1124.5784                                                                                                                                                                                                                                                                                                                                                                                                                                                                                                                                                                                                                                                                   | 1123.5711 | 1123.5622 | 7.97   | 650   | -   | 659  | 1    | ---     | K.AQYSSDLRK.C               |
| 1143.6165                                                                                                                                                                                                                                                                                                                                                                                                                                                                                                                                                                                                                                                                   | 1142.6092 | 1142.6407 | -27.57 | 1010  | -   | 1018 | 1    | ---     | K.RQESLELIR.K               |
| 1211.6163                                                                                                                                                                                                                                                                                                                                                                                                                                                                                                                                                                                                                                                                   | 1210.6090 | 1210.6458 | -30.41 | 1019  | -   | 1028 | 1    | ---     | R.KGYTQQLAFR.Q              |
| 1211.6163                                                                                                                                                                                                                                                                                                                                                                                                                                                                                                                                                                                                                                                                   | 1210.6091 | 1210.6458 | -30.39 | 1019  | -   | 1028 | 1    | ---     | R.KGYTQQLAFR.Q              |
| 2157.0273                                                                                                                                                                                                                                                                                                                                                                                                                                                                                                                                                                                                                                                                   | 2156.0200 | 2156.0783 | -27.04 | 948   | -   | 967  | 0    | ---     | K.ILLQGTTPVAQMTEDAIDGER.L   |
| 2157.0273                                                                                                                                                                                                                                                                                                                                                                                                                                                                                                                                                                                                                                                                   | 2156.0201 | 2156.0783 | -27.02 | 948   | -   | 967  | 0    | 35      | K.ILLQGTTPVAQMTEDAIDGER.L   |
| 2506.2144                                                                                                                                                                                                                                                                                                                                                                                                                                                                                                                                                                                                                                                                   | 2505.2071 | 2505.2692 | -24.80 | 1031  | -   | 1052 | 0    | ---     | K.SSAYAAFYRPPSTWLTAYVVK.V   |
| 2506.2144                                                                                                                                                                                                                                                                                                                                                                                                                                                                                                                                                                                                                                                                   | 2505.2071 | 2505.2692 | -24.79 | 1031  | -   | 1052 | 0    | ---     | K.SSAYAAFYRPPSTWLTAYVVK.V   |
| 2598.2195                                                                                                                                                                                                                                                                                                                                                                                                                                                                                                                                                                                                                                                                   | 2597.2122 | 2597.2697 | -22.12 | 1080  | -   | 1102 | 0    | ---     | K.QKPDGIFQEDGPIHQEMIGGFR.D  |
| No match to: 842.4847, 853.4918, 857.4026, 857.4026, 868.5277, 870.5200, 882.5434, 882.5434, 951.5951, 1017.6425, 1019.6487, 1033.6698, 1036.5013, 1036.5013, 1045.5382, 1051.6785, 1051.6785, 1107.5156, 1131.6732, 1136.6610, 1151.6952, 1162.5488, 1165.5533, 1165.7053, 1179.5667, 1200.5436, 1221.5270, 1221.5270, 1263.6616, 1277.6742, 1290.6333, 1300.8134, 1334.8459, 1334.8459, 1361.6049, 1379.6898, 1407.6674, 1434.8688, 1448.8787, 1475.7053, 1479.7522, 1482.7051, 1567.6991, 1618.0178, 1732.0514, 1790.9982, 1790.9982, 1808.9220, 1879.9926, 1880.9891, 1880.9891, 1890.9176, 1901.2008, 1993.9156, 2064.0874, 2098.0544, 2179.9844, 2211.0493, 2283.1272 |           |           |        |       |     |      |      |         |                             |

17. A0A4W2DYD9 Mass: 31930 Score: 54 Expect: 0.56 Matches: 12

|                                                                                                     |           |           |        |       |     |      |      |         |                             |
|-----------------------------------------------------------------------------------------------------|-----------|-----------|--------|-------|-----|------|------|---------|-----------------------------|
| Phosphatidylinositol transfer protein beta OS=Bos indicus x Bos taurus OX=30522 GN=PITPNB PE=4 SV=1 |           |           |        |       |     |      |      |         |                             |
| Observed                                                                                            | Mr(expt)  | Mr(calc)  | ppm    | Start | End | Miss | Ions | Peptide |                             |
| 848.4952                                                                                            | 847.4879  | 847.5531  | -76.92 | 195   | -   | 201  | 1    | ---     | K.LVTIKFK.W                 |
| 868.5277                                                                                            | 867.5204  | 867.4603  | 69.3   | 171   | -   | 178  | 0    | ---     | R.GPLGNPWK.K                |
| 996.5623                                                                                            | 995.5550  | 995.5552  | -0.21  | 171   | -   | 179  | 1    | ---     | R.GPLGNPWK.E                |
| 1036.5013                                                                                           | 1035.4940 | 1035.4873 | 6.52   | 147   | -   | 155  | 0    | ---     | R.SQVEPADYK.A               |
| 1036.5013                                                                                           | 1035.4941 | 1035.4873 | 6.56   | 147   | -   | 155  | 0    | ---     | R.SQVEPADYK.A               |
| 1051.6785                                                                                           | 1050.6712 | 1050.5896 | 77.7   | 1     | -   | 8    | 1    | ---     | -.MVLKEFR.V + Oxidation (M) |
| 1051.6785                                                                                           | 1050.6712 | 1050.5896 | 77.7   | 1     | -   | 8    | 1    | ---     | -.MVLKEFR.V + Oxidation (M) |
| 1090.4995                                                                                           | 1089.4922 | 1089.5832 | -83.49 | 219   | -   | 226  | 1    | ---     | K.RIFTNFHR.Q                |

1162.5488 1161.5415 1161.5414 0.07 51 - 60 1 --- K.DGEKGGQYTHK.I  
1179.5667 1178.5594 1178.6237 -54.50 200 - 208 1 --- K.PKWWGLQSK.V  
1200.5436 1199.5363 1199.5182 15.1 87 - 95 0 --- K.AWNAYPYCR.T  
1879.9926 1878.9853 1878.9073 41.5 96 - 110 1 --- R.TIVTNEYMKDDFFIK.I + Oxidation (M)  
**No match to:** 842.4847, 845.4012, 850.5135, 853.4918, 857.4026, 857.4026, 864.5186, 870.5200, 882.5434, 882.5434, 951.5951, 987.5186, 1017.6425, 1019.6487, 1033.6698, 1045.5382, 1083.5225, 1083.5225, 1107.5156, 1124.5784, 1131.6732, 1136.6610, 1143.6165, 1151.6952, 1165.5533, 1165.7053, 1211.6163, 1211.6163, 1221.5270, 1221.5270, 1263.6616, 1277.6742, 1290.6333, 1300.8134, 1334.8459, 1334.8459, 1361.6049, 1379.6898, 1407.6674, 1434.8688, 1448.8787, 1475.7053, 1479.7522, 1482.7051, 1567.6991, 1618.0178, 1732.0514, 1790.9982, 1790.9982, 1808.9220, 1880.9891, 1880.9891, 1890.9176, 1901.2008, 1993.9156, 2064.0874, 2098.0544, 2157.0273, 2157.0273, 2179.9844, 2211.0493, 2283.1272, 2506.2144, 2506.2144, 2598.2195

18. [A0A4W2C513](#) Mass: 31804 Score: 53 Expect: 0.64 Matches: 12  
Phosphatidylinositol transfer protein beta OS=Bos indicus x Bos taurus OX=30522 GN=PITPNB PE=4 SV=1

| Observed                                                                                                                                                                                                                                                                                                                                                                                                                                                                                                                                                                                                                                                                                                                                          | Mr(expt)  | Mr(calc)  | ppm    | Start | End | Miss | Ions | Peptide                             |
|---------------------------------------------------------------------------------------------------------------------------------------------------------------------------------------------------------------------------------------------------------------------------------------------------------------------------------------------------------------------------------------------------------------------------------------------------------------------------------------------------------------------------------------------------------------------------------------------------------------------------------------------------------------------------------------------------------------------------------------------------|-----------|-----------|--------|-------|-----|------|------|-------------------------------------|
| 848.4952                                                                                                                                                                                                                                                                                                                                                                                                                                                                                                                                                                                                                                                                                                                                          | 847.4879  | 847.5531  | -76.92 | 195   | 201 | 1    | ---  | K.LVTIKFK.W                         |
| 868.5277                                                                                                                                                                                                                                                                                                                                                                                                                                                                                                                                                                                                                                                                                                                                          | 867.5204  | 867.4603  | 69.3   | 171   | 178 | 0    | ---  | R.GPLGPNWK.K                        |
| 996.5623                                                                                                                                                                                                                                                                                                                                                                                                                                                                                                                                                                                                                                                                                                                                          | 995.5550  | 995.5552  | -0.21  | 171   | 179 | 1    | ---  | R.GPLGPNWK.K.E                      |
| 1036.5013                                                                                                                                                                                                                                                                                                                                                                                                                                                                                                                                                                                                                                                                                                                                         | 1035.4940 | 1035.4873 | 6.52   | 147   | 155 | 0    | ---  | R.SQVEPADYK.A                       |
| 1036.5013                                                                                                                                                                                                                                                                                                                                                                                                                                                                                                                                                                                                                                                                                                                                         | 1035.4941 | 1035.4873 | 6.56   | 147   | 155 | 0    | ---  | R.SQVEPADYK.A                       |
| 1051.6785                                                                                                                                                                                                                                                                                                                                                                                                                                                                                                                                                                                                                                                                                                                                         | 1050.6712 | 1050.5896 | 77.7   | 1     | 8   | 1    | ---  | -.MVLIKEFR.V + Oxidation (M)        |
| 1051.6785                                                                                                                                                                                                                                                                                                                                                                                                                                                                                                                                                                                                                                                                                                                                         | 1050.6712 | 1050.5896 | 77.7   | 1     | 8   | 1    | ---  | -.MVLIKEFR.V + Oxidation (M)        |
| 1090.4995                                                                                                                                                                                                                                                                                                                                                                                                                                                                                                                                                                                                                                                                                                                                         | 1089.4922 | 1089.5832 | -83.49 | 219   | 226 | 1    | ---  | K.RIFTNFRH.Q                        |
| 1162.5488                                                                                                                                                                                                                                                                                                                                                                                                                                                                                                                                                                                                                                                                                                                                         | 1161.5415 | 1161.5414 | 0.07   | 51    | 60  | 1    | ---  | K.DGEKGGQYTHK.I                     |
| 1179.5667                                                                                                                                                                                                                                                                                                                                                                                                                                                                                                                                                                                                                                                                                                                                         | 1178.5594 | 1178.6237 | -54.50 | 200   | 208 | 1    | ---  | K.PKWWGLQSK.V                       |
| 1200.5436                                                                                                                                                                                                                                                                                                                                                                                                                                                                                                                                                                                                                                                                                                                                         | 1199.5363 | 1199.5182 | 15.1   | 87    | 95  | 0    | ---  | K.AWNAYPYCR.T                       |
| 1879.9926                                                                                                                                                                                                                                                                                                                                                                                                                                                                                                                                                                                                                                                                                                                                         | 1878.9853 | 1878.9073 | 41.5   | 96    | 110 | 1    | ---  | R.TIVTNEYMKDDFFIK.I + Oxidation (M) |
| <b>No match to:</b> 842.4847, 845.4012, 850.5135, 853.4918, 857.4026, 857.4026, 864.5186, 870.5200, 882.5434, 882.5434, 951.5951, 987.5186, 1017.6425, 1019.6487, 1033.6698, 1045.5382, 1083.5225, 1083.5225, 1107.5156, 1124.5784, 1131.6732, 1136.6610, 1143.6165, 1151.6952, 1165.5533, 1165.7053, 1211.6163, 1211.6163, 1221.5270, 1221.5270, 1263.6616, 1277.6742, 1290.6333, 1300.8134, 1334.8459, 1334.8459, 1361.6049, 1379.6898, 1407.6674, 1434.8688, 1448.8787, 1475.7053, 1479.7522, 1482.7051, 1567.6991, 1618.0178, 1732.0514, 1790.9982, 1790.9982, 1808.9220, 1880.9891, 1880.9891, 1890.9176, 1901.2008, 1993.9156, 2064.0874, 2098.0544, 2157.0273, 2157.0273, 2179.9844, 2211.0493, 2283.1272, 2506.2144, 2506.2144, 2598.2195 |           |           |        |       |     |      |      |                                     |

19. [Q9TR36](#) Mass: 31804 Score: 53 Expect: 0.64 Matches: 12  
Phosphatidylinositol transfer protein beta isoform OS=Bos taurus OX=9913 GN=PITPNB PE=1 SV=3

| Observed                                                                                                                                                                                                                                                                                                                                                                                                                                                                                                                                                                                                                                                                                                                                          | Mr(expt)  | Mr(calc)  | ppm    | Start | End | Miss | Ions | Peptide                             |
|---------------------------------------------------------------------------------------------------------------------------------------------------------------------------------------------------------------------------------------------------------------------------------------------------------------------------------------------------------------------------------------------------------------------------------------------------------------------------------------------------------------------------------------------------------------------------------------------------------------------------------------------------------------------------------------------------------------------------------------------------|-----------|-----------|--------|-------|-----|------|------|-------------------------------------|
| 848.4952                                                                                                                                                                                                                                                                                                                                                                                                                                                                                                                                                                                                                                                                                                                                          | 847.4879  | 847.5531  | -76.92 | 195   | 201 | 1    | ---  | K.LVTIKFK.W                         |
| 868.5277                                                                                                                                                                                                                                                                                                                                                                                                                                                                                                                                                                                                                                                                                                                                          | 867.5204  | 867.4603  | 69.3   | 171   | 178 | 0    | ---  | R.GPLGPNWK.K                        |
| 996.5623                                                                                                                                                                                                                                                                                                                                                                                                                                                                                                                                                                                                                                                                                                                                          | 995.5550  | 995.5552  | -0.21  | 171   | 179 | 1    | ---  | R.GPLGPNWK.K.E                      |
| 1036.5013                                                                                                                                                                                                                                                                                                                                                                                                                                                                                                                                                                                                                                                                                                                                         | 1035.4940 | 1035.4873 | 6.52   | 147   | 155 | 0    | ---  | R.SQVEPADYK.A                       |
| 1036.5013                                                                                                                                                                                                                                                                                                                                                                                                                                                                                                                                                                                                                                                                                                                                         | 1035.4941 | 1035.4873 | 6.56   | 147   | 155 | 0    | ---  | R.SQVEPADYK.A                       |
| 1051.6785                                                                                                                                                                                                                                                                                                                                                                                                                                                                                                                                                                                                                                                                                                                                         | 1050.6712 | 1050.5896 | 77.7   | 1     | 8   | 1    | ---  | -.MVLIKEFR.V + Oxidation (M)        |
| 1051.6785                                                                                                                                                                                                                                                                                                                                                                                                                                                                                                                                                                                                                                                                                                                                         | 1050.6712 | 1050.5896 | 77.7   | 1     | 8   | 1    | ---  | -.MVLIKEFR.V + Oxidation (M)        |
| 1090.4995                                                                                                                                                                                                                                                                                                                                                                                                                                                                                                                                                                                                                                                                                                                                         | 1089.4922 | 1089.5832 | -83.49 | 219   | 226 | 1    | ---  | K.RIFTNFRH.Q                        |
| 1162.5488                                                                                                                                                                                                                                                                                                                                                                                                                                                                                                                                                                                                                                                                                                                                         | 1161.5415 | 1161.5414 | 0.07   | 51    | 60  | 1    | ---  | K.DGEKGGQYTHK.I                     |
| 1179.5667                                                                                                                                                                                                                                                                                                                                                                                                                                                                                                                                                                                                                                                                                                                                         | 1178.5594 | 1178.6237 | -54.50 | 200   | 208 | 1    | ---  | K.PKWWGLQSK.V                       |
| 1200.5436                                                                                                                                                                                                                                                                                                                                                                                                                                                                                                                                                                                                                                                                                                                                         | 1199.5363 | 1199.5182 | 15.1   | 87    | 95  | 0    | ---  | K.AWNAYPYCR.T                       |
| 1879.9926                                                                                                                                                                                                                                                                                                                                                                                                                                                                                                                                                                                                                                                                                                                                         | 1878.9853 | 1878.9073 | 41.5   | 96    | 110 | 1    | ---  | R.TIVTNEYMKDDFFIK.I + Oxidation (M) |
| <b>No match to:</b> 842.4847, 845.4012, 850.5135, 853.4918, 857.4026, 857.4026, 864.5186, 870.5200, 882.5434, 882.5434, 951.5951, 987.5186, 1017.6425, 1019.6487, 1033.6698, 1045.5382, 1083.5225, 1083.5225, 1107.5156, 1124.5784, 1131.6732, 1136.6610, 1143.6165, 1151.6952, 1165.5533, 1165.7053, 1211.6163, 1211.6163, 1221.5270, 1221.5270, 1263.6616, 1277.6742, 1290.6333, 1300.8134, 1334.8459, 1334.8459, 1361.6049, 1379.6898, 1407.6674, 1434.8688, 1448.8787, 1475.7053, 1479.7522, 1482.7051, 1567.6991, 1618.0178, 1732.0514, 1790.9982, 1790.9982, 1808.9220, 1880.9891, 1880.9891, 1890.9176, 1901.2008, 1993.9156, 2064.0874, 2098.0544, 2157.0273, 2157.0273, 2179.9844, 2211.0493, 2283.1272, 2506.2144, 2506.2144, 2598.2195 |           |           |        |       |     |      |      |                                     |

20. [A0A4W2FGB2](#) Mass: 205135 Score: 53 Expect: 0.67 Matches: 18  
Poly [ADP-ribose] polymerase OS=Bos indicus x Bos taurus OX=30522 GN=PARP14 PE=4 SV=1

| Observed                                                                                                                                                                                                                                                                                                                                                                                                                                                                                                                                                                                                                                                                         | Mr(expt)  | Mr(calc)  | ppm    | Start | End  | Miss | Ions | Peptide                   |
|----------------------------------------------------------------------------------------------------------------------------------------------------------------------------------------------------------------------------------------------------------------------------------------------------------------------------------------------------------------------------------------------------------------------------------------------------------------------------------------------------------------------------------------------------------------------------------------------------------------------------------------------------------------------------------|-----------|-----------|--------|-------|------|------|------|---------------------------|
| 850.5135                                                                                                                                                                                                                                                                                                                                                                                                                                                                                                                                                                                                                                                                         | 849.5062  | 849.5324  | -30.79 | 1752  | 1759 | 0    | ---  | R.SLIVPPPK.D              |
| 882.5434                                                                                                                                                                                                                                                                                                                                                                                                                                                                                                                                                                                                                                                                         | 881.5361  | 881.4494  | 98.4   | 1580  | 1587 | 0    | ---  | K.TYIATDAK.G              |
| 882.5434                                                                                                                                                                                                                                                                                                                                                                                                                                                                                                                                                                                                                                                                         | 881.5361  | 881.4494  | 98.4   | 1580  | 1587 | 0    | ---  | K.TYIATDAK.G              |
| 996.5623                                                                                                                                                                                                                                                                                                                                                                                                                                                                                                                                                                                                                                                                         | 995.5550  | 995.5011  | 54.2   | 1734  | 1740 | 1    | ---  | K.KHMYVVR.V               |
| 1124.5784                                                                                                                                                                                                                                                                                                                                                                                                                                                                                                                                                                                                                                                                        | 1123.5711 | 1123.5509 | 18.0   | 385   | 394  | 0    | ---  | K.DASTLFSDIR.S            |
| 1143.6165                                                                                                                                                                                                                                                                                                                                                                                                                                                                                                                                                                                                                                                                        | 1142.6092 | 1142.6295 | -17.75 | 1052  | 1061 | 1    | ---  | K.AGQKLQEELK.T            |
| 1162.5488                                                                                                                                                                                                                                                                                                                                                                                                                                                                                                                                                                                                                                                                        | 1161.5415 | 1161.5699 | -24.47 | 1549  | 1558 | 0    | ---  | K.ITNMQLEDAK.K            |
| 1200.5436                                                                                                                                                                                                                                                                                                                                                                                                                                                                                                                                                                                                                                                                        | 1199.5363 | 1199.6121 | -63.16 | 29    | 37   | 1    | ---  | K.LQMYFQSRK.R             |
| 1211.6163                                                                                                                                                                                                                                                                                                                                                                                                                                                                                                                                                                                                                                                                        | 1210.6090 | 1210.5618 | 39.0   | 73    | 82   | 0    | ---  | R.ESHELEWPGK.G            |
| 1211.6163                                                                                                                                                                                                                                                                                                                                                                                                                                                                                                                                                                                                                                                                        | 1210.6091 | 1210.5618 | 39.0   | 73    | 82   | 0    | ---  | R.ESHELEWPGK.G            |
| 1290.6333                                                                                                                                                                                                                                                                                                                                                                                                                                                                                                                                                                                                                                                                        | 1289.6260 | 1289.6146 | 8.85   | 1264  | 1274 | 1    | ---  | R.AGRNVEIECSR.Q           |
| 1407.6674                                                                                                                                                                                                                                                                                                                                                                                                                                                                                                                                                                                                                                                                        | 1406.6601 | 1406.7340 | -52.53 | 1420  | 1431 | 1    | ---  | K.KTELAVFQVGR.N           |
| 1434.8688                                                                                                                                                                                                                                                                                                                                                                                                                                                                                                                                                                                                                                                                        | 1433.8615 | 1433.8103 | 35.7   | 1295  | 1307 | 1    | ---  | K.NIIHVIGGNDVKR.S         |
| 1880.9891                                                                                                                                                                                                                                                                                                                                                                                                                                                                                                                                                                                                                                                                        | 1879.9818 | 1879.9527 | 15.5   | 1237  | 1253 | 1    | ---  | K.EEADVIVNSTSKSFNLK.A     |
| 1880.9891                                                                                                                                                                                                                                                                                                                                                                                                                                                                                                                                                                                                                                                                        | 1879.9819 | 1879.9527 | 15.5   | 1237  | 1253 | 1    | ---  | K.EEADVIVNSTSKSFNLK.A     |
| 2157.0273                                                                                                                                                                                                                                                                                                                                                                                                                                                                                                                                                                                                                                                                        | 2156.0200 | 2156.1478 | -59.24 | 83    | 101  | 1    | ---  | K.GTFKLTQIPTVPDEVQER.K    |
| 2157.0273                                                                                                                                                                                                                                                                                                                                                                                                                                                                                                                                                                                                                                                                        | 2156.0201 | 2156.1478 | -59.22 | 83    | 101  | 1    | 26   | K.GTFKLTQIPTVPDEVQER.K    |
| 2211.0493                                                                                                                                                                                                                                                                                                                                                                                                                                                                                                                                                                                                                                                                        | 2210.0420 | 2210.2271 | -83.72 | 1056  | 1076 | 1    | ---  | K.LQEELKTAGQGVVVDVGTCLR.T |
| <b>No match to:</b> 842.4847, 845.4012, 848.4952, 853.4918, 857.4026, 857.4026, 864.5186, 868.5277, 870.5200, 951.5951, 987.5186, 1017.6425, 1019.6487, 1033.6698, 1036.5013, 1036.5013, 1045.5382, 1051.6785, 1051.6785, 1083.5225, 1083.5225, 1090.4995, 1107.5156, 1131.6732, 1136.6610, 1151.6952, 1165.5533, 1165.7053, 1179.5667, 1221.5270, 1221.5270, 1263.6616, 1277.6742, 1300.8134, 1334.8459, 1334.8459, 1361.6049, 1379.6898, 1448.8787, 1475.7053, 1479.7522, 1482.7051, 1567.6991, 1618.0178, 1732.0514, 1790.9982, 1790.9982, 1808.9220, 1879.9926, 1890.9176, 1901.2008, 1993.9156, 2064.0874, 2098.0544, 2179.9844, 2283.1272, 2506.2144, 2506.2144, 2598.2195 |           |           |        |       |      |      |      |                           |

21. [A0A4W2EP89](#) Mass: 190854 Score: 50 Expect: 1.4 Matches: 17  
Poly(ADP-ribose) polymerase family member 14 OS=Bos indicus x Bos taurus OX=30522 GN=PARP14 PE=4 SV=1

| Observed  | Mr(expt)  | Mr(calc)  | ppm    | Start | End  | Miss | Ions | Peptide                         |
|-----------|-----------|-----------|--------|-------|------|------|------|---------------------------------|
| 882.5434  | 881.5361  | 881.4494  | 98.4   | 1580  | 1587 | 0    | ---  | K.TYIATDAK.G                    |
| 882.5434  | 881.5361  | 881.4494  | 98.4   | 1580  | 1587 | 0    | ---  | K.TYIATDAK.G                    |
| 1124.5784 | 1123.5711 | 1123.5509 | 18.0   | 385   | 394  | 0    | ---  | K.DASTLFSDIR.S                  |
| 1143.6165 | 1142.6092 | 1142.6295 | -17.75 | 1052  | 1061 | 1    | ---  | K.AGQKLQEELK.T                  |
| 1162.5488 | 1161.5415 | 1161.5699 | -24.47 | 1549  | 1558 | 0    | ---  | K.ITNMQLEDAK.K                  |
| 1179.5667 | 1178.5594 | 1178.5689 | -8.01  | 1663  | 1671 | 1    | ---  | K.TVWMPRMAR.- + 2 Oxidation (M) |
| 1200.5436 | 1199.5363 | 1199.6121 | -63.16 | 29    | 37   | 1    | ---  | K.LQMYFQSRK.R                   |
| 1211.6163 | 1210.6090 | 1210.5618 | 39.0   | 73    | 82   | 0    | ---  | R.ESHELEWPGK.G                  |
| 1211.6163 | 1210.6091 | 1210.5618 | 39.0   | 73    | 82   | 0    | ---  | R.ESHELEWPGK.G                  |





|                                                                                                                                                                                                                                                                                                                                                                                                                                                                                                                                                                                                                                                                                    |           |           |        |      |   |      |   |     |                           |
|------------------------------------------------------------------------------------------------------------------------------------------------------------------------------------------------------------------------------------------------------------------------------------------------------------------------------------------------------------------------------------------------------------------------------------------------------------------------------------------------------------------------------------------------------------------------------------------------------------------------------------------------------------------------------------|-----------|-----------|--------|------|---|------|---|-----|---------------------------|
| 1290.6333                                                                                                                                                                                                                                                                                                                                                                                                                                                                                                                                                                                                                                                                          | 1289.6260 | 1289.6146 | 8.85   | 1264 | - | 1274 | 1 | --- | R.AGRNVEIECSR.Q           |
| 1407.6674                                                                                                                                                                                                                                                                                                                                                                                                                                                                                                                                                                                                                                                                          | 1406.6601 | 1406.7340 | -52.53 | 1420 | - | 1431 | 1 | --- | K.KTELAVFQVCGR.N          |
| 1434.8688                                                                                                                                                                                                                                                                                                                                                                                                                                                                                                                                                                                                                                                                          | 1433.8615 | 1433.8103 | 35.7   | 1295 | - | 1307 | 1 | --- | K.NIIHVIGGNDVKR.S         |
| 1880.9891                                                                                                                                                                                                                                                                                                                                                                                                                                                                                                                                                                                                                                                                          | 1879.9818 | 1879.9527 | 15.5   | 1237 | - | 1253 | 1 | --- | K.EEADVIVNSTKSFNLK.A      |
| 1880.9891                                                                                                                                                                                                                                                                                                                                                                                                                                                                                                                                                                                                                                                                          | 1879.9819 | 1879.9527 | 15.5   | 1237 | - | 1253 | 1 | --- | K.EEADVIVNSTKSFNLK.A      |
| 2157.0273                                                                                                                                                                                                                                                                                                                                                                                                                                                                                                                                                                                                                                                                          | 2156.0200 | 2156.1478 | -59.24 | 83   | - | 101  | 1 | --- | K.GTFKLTQIPTVPDEVQER.K    |
| 2157.0273                                                                                                                                                                                                                                                                                                                                                                                                                                                                                                                                                                                                                                                                          | 2156.0201 | 2156.1478 | -59.22 | 83   | - | 101  | 1 | 26  | K.GTFKLTQIPTVPDEVQER.K    |
| 2211.0493                                                                                                                                                                                                                                                                                                                                                                                                                                                                                                                                                                                                                                                                          | 2210.0420 | 2210.2271 | -83.72 | 1056 | - | 1076 | 1 | --- | K.LQEELKTAGQGVVVDVGTVLR.T |
| No match to: 842.4847, 845.4012, 848.4952, 850.5135, 853.4918, 857.4026, 857.4026, 864.5186, 868.5277, 870.5200, 951.5951, 987.5186, 996.5623, 1017.6425, 1019.6487, 1033.6698, 1036.5013, 1036.5013, 1045.5382, 1051.6785, 1051.6785, 1083.5225, 1083.5225, 1090.4995, 1107.5156, 1131.6732, 1136.6610, 1151.6952, 1165.5533, 1165.7053, 1221.5270, 1221.5270, 1263.6616, 1277.6742, 1300.8134, 1334.8459, 1334.8459, 1361.6049, 1379.6898, 1448.8787, 1475.7053, 1479.7522, 1482.7051, 1567.6991, 1618.0178, 1732.0514, 1790.9982, 1790.9982, 1808.9220, 1879.9926, 1890.9176, 1901.2008, 1993.9156, 2064.0874, 2098.0544, 2179.9844, 2283.1272, 2506.2144, 2506.2144, 2598.2195 |           |           |        |      |   |      |   |     |                           |

22. [F1ML90](#) Mass: 204793 Score: 49 Expect: 1.5 Matches: 17

Poly [ADP-ribose] polymerase OS=Bos taurus OX=9913 GN=PARP14 PE=4 SV=3

| Observed                                                                                                                                                                                                                                                                                                                                                                                                                                                                                                                                                                                                                                                                            | Mr(expt)  | Mr(calc)  | ppm    | Start | End    | Miss | Ions | Peptide                   |
|-------------------------------------------------------------------------------------------------------------------------------------------------------------------------------------------------------------------------------------------------------------------------------------------------------------------------------------------------------------------------------------------------------------------------------------------------------------------------------------------------------------------------------------------------------------------------------------------------------------------------------------------------------------------------------------|-----------|-----------|--------|-------|--------|------|------|---------------------------|
| 882.5434                                                                                                                                                                                                                                                                                                                                                                                                                                                                                                                                                                                                                                                                            | 881.5361  | 881.4494  | 98.4   | 1578  | - 1585 | 0    | ---  | K.TYIATDAK.G              |
| 882.5434                                                                                                                                                                                                                                                                                                                                                                                                                                                                                                                                                                                                                                                                            | 881.5361  | 881.4494  | 98.4   | 1578  | - 1585 | 0    | ---  | K.TYIATDAK.G              |
| 996.5623                                                                                                                                                                                                                                                                                                                                                                                                                                                                                                                                                                                                                                                                            | 995.5550  | 995.5011  | 54.2   | 1732  | - 1738 | 1    | ---  | K.KHMYVVR.V               |
| 1124.5784                                                                                                                                                                                                                                                                                                                                                                                                                                                                                                                                                                                                                                                                           | 1123.5711 | 1123.5509 | 18.0   | 383   | - 392  | 0    | ---  | K.DASTLFSDIR.S            |
| 1143.6165                                                                                                                                                                                                                                                                                                                                                                                                                                                                                                                                                                                                                                                                           | 1142.6092 | 1142.6295 | -17.75 | 1050  | - 1059 | 1    | ---  | K.AGQKLQEELK.T            |
| 1162.5488                                                                                                                                                                                                                                                                                                                                                                                                                                                                                                                                                                                                                                                                           | 1161.5415 | 1161.5699 | -24.47 | 1547  | - 1556 | 0    | ---  | K.ITNMQLEDAK.K            |
| 1200.5436                                                                                                                                                                                                                                                                                                                                                                                                                                                                                                                                                                                                                                                                           | 1199.5363 | 1199.6121 | -63.16 | 27    | - 35   | 1    | ---  | K.LQMYFQSRK.R             |
| 1211.6163                                                                                                                                                                                                                                                                                                                                                                                                                                                                                                                                                                                                                                                                           | 1210.6090 | 1210.5618 | 39.0   | 71    | - 80   | 0    | ---  | R.ESHELEWPGK.G            |
| 1211.6163                                                                                                                                                                                                                                                                                                                                                                                                                                                                                                                                                                                                                                                                           | 1210.6091 | 1210.5618 | 39.0   | 71    | - 80   | 0    | ---  | R.ESHELEWPGK.G            |
| 1290.6333                                                                                                                                                                                                                                                                                                                                                                                                                                                                                                                                                                                                                                                                           | 1289.6260 | 1289.6146 | 8.85   | 1262  | - 1272 | 1    | ---  | R.AGRNVEIECSR.Q           |
| 1407.6674                                                                                                                                                                                                                                                                                                                                                                                                                                                                                                                                                                                                                                                                           | 1406.6601 | 1406.7340 | -52.53 | 1418  | - 1429 | 1    | ---  | K.KTELAVFQVCGR.N          |
| 1434.8688                                                                                                                                                                                                                                                                                                                                                                                                                                                                                                                                                                                                                                                                           | 1433.8615 | 1433.8103 | 35.7   | 1293  | - 1305 | 1    | ---  | K.NIIHVIGGNDVKR.S         |
| 1880.9891                                                                                                                                                                                                                                                                                                                                                                                                                                                                                                                                                                                                                                                                           | 1879.9818 | 1879.9527 | 15.5   | 1235  | - 1251 | 1    | ---  | K.EEADVIVNSTKSFNLK.A      |
| 1880.9891                                                                                                                                                                                                                                                                                                                                                                                                                                                                                                                                                                                                                                                                           | 1879.9819 | 1879.9527 | 15.5   | 1235  | - 1251 | 1    | ---  | K.EEADVIVNSTKSFNLK.A      |
| 2157.0273                                                                                                                                                                                                                                                                                                                                                                                                                                                                                                                                                                                                                                                                           | 2156.0200 | 2156.1478 | -59.24 | 81    | - 99   | 1    | ---  | K.GTFKLTVQIPTVPDEVQER.K   |
| 2157.0273                                                                                                                                                                                                                                                                                                                                                                                                                                                                                                                                                                                                                                                                           | 2156.0201 | 2156.1478 | -59.22 | 81    | - 99   | 1    | 26   | K.GTFKLTVQIPTVPDEVQER.K   |
| 2211.0493                                                                                                                                                                                                                                                                                                                                                                                                                                                                                                                                                                                                                                                                           | 2210.0420 | 2210.2271 | -83.72 | 1054  | - 1074 | 1    | ---  | K.LQEELKTAGQGVVVDVGTVLR.T |
| No match to: 842.4847, 845.4012, 848.4952, 850.5135, 853.4918, 857.4026, 857.4026, 864.5186, 868.5277, 870.5200, 951.5951, 987.5186, 1017.6425, 1019.6487, 1033.6698, 1036.5013, 1036.5013, 1045.5382, 1051.6785, 1051.6785, 1083.5225, 1083.5225, 1090.4995, 1107.5156, 1131.6732, 1136.6610, 1151.6952, 1165.5533, 1165.7053, 1179.5667, 1221.5270, 1221.5270, 1263.6616, 1277.6742, 1300.8134, 1334.8459, 1334.8459, 1361.6049, 1379.6898, 1448.8787, 1475.7053, 1479.7522, 1482.7051, 1567.6991, 1618.0178, 1732.0514, 1790.9982, 1790.9982, 1808.9220, 1879.9926, 1890.9176, 1901.2008, 1993.9156, 2064.0874, 2098.0544, 2179.9844, 2283.1272, 2506.2144, 2506.2144, 2598.2195 |           |           |        |       |        |      |      |                           |

23. [A0A4W2CYS7](#) Mass: 190256 Score: 48 Expect: 2 Matches: 16

Poly(ADP-ribose) polymerase family member 14 OS=Bos indicus x Bos taurus OX=30522 GN=PARP14 PE=4 SV=1

| observed                                                                                                                                                                                                                                                                                                                                                                                                                                                                                                                                                                                                                                                                                      | Mr(expt)  | Mr(calc)  | ppm    | Start | End    | Miss | Ions | Peptide                   |
|-----------------------------------------------------------------------------------------------------------------------------------------------------------------------------------------------------------------------------------------------------------------------------------------------------------------------------------------------------------------------------------------------------------------------------------------------------------------------------------------------------------------------------------------------------------------------------------------------------------------------------------------------------------------------------------------------|-----------|-----------|--------|-------|--------|------|------|---------------------------|
| 882.5434                                                                                                                                                                                                                                                                                                                                                                                                                                                                                                                                                                                                                                                                                      | 881.5361  | 881.4494  | 98.4   | 1580  | - 1587 | 0    | ---  | K.TYIATDAK.G              |
| 882.5434                                                                                                                                                                                                                                                                                                                                                                                                                                                                                                                                                                                                                                                                                      | 881.5361  | 881.4494  | 98.4   | 1580  | - 1587 | 0    | ---  | K.TYIATDAK.G              |
| 1124.5784                                                                                                                                                                                                                                                                                                                                                                                                                                                                                                                                                                                                                                                                                     | 1123.5711 | 1123.5509 | 18.0   | 385   | - 394  | 0    | ---  | K.DASTLFSDDR.S            |
| 1143.6165                                                                                                                                                                                                                                                                                                                                                                                                                                                                                                                                                                                                                                                                                     | 1142.6092 | 1142.6295 | -17.75 | 1052  | - 1061 | 1    | ---  | K.AGQKLQEELK.T            |
| 1162.5488                                                                                                                                                                                                                                                                                                                                                                                                                                                                                                                                                                                                                                                                                     | 1161.5415 | 1161.5699 | -24.47 | 1549  | - 1558 | 0    | ---  | K.ITNMQLEDAK.K            |
| 1200.5436                                                                                                                                                                                                                                                                                                                                                                                                                                                                                                                                                                                                                                                                                     | 1199.5363 | 1199.6121 | -63.16 | 29    | - 37   | 1    | ---  | K.LQMYFQSRK.R             |
| 1211.6163                                                                                                                                                                                                                                                                                                                                                                                                                                                                                                                                                                                                                                                                                     | 1210.6090 | 1210.5618 | 39.0   | 73    | - 82   | 0    | ---  | R.ESHELEWPGK.G            |
| 1211.6163                                                                                                                                                                                                                                                                                                                                                                                                                                                                                                                                                                                                                                                                                     | 1210.6091 | 1210.5618 | 39.0   | 73    | - 82   | 0    | ---  | R.ESHELEWPGK.G            |
| 1290.6333                                                                                                                                                                                                                                                                                                                                                                                                                                                                                                                                                                                                                                                                                     | 1289.6260 | 1289.6146 | 8.85   | 1264  | - 1274 | 1    | ---  | R.AGRNVEIECSR.Q           |
| 1407.6674                                                                                                                                                                                                                                                                                                                                                                                                                                                                                                                                                                                                                                                                                     | 1406.6601 | 1406.7340 | -52.53 | 1420  | - 1431 | 1    | ---  | K.KTELAVFQVCGR.N          |
| 1434.8688                                                                                                                                                                                                                                                                                                                                                                                                                                                                                                                                                                                                                                                                                     | 1433.8615 | 1433.8103 | 35.7   | 1295  | - 1307 | 1    | ---  | K.NIIHVIGGNDVKR.S         |
| 1880.9891                                                                                                                                                                                                                                                                                                                                                                                                                                                                                                                                                                                                                                                                                     | 1879.9818 | 1879.9527 | 15.5   | 1237  | - 1253 | 1    | ---  | K.EEADVIVNSTKSFNLK.A      |
| 1880.9891                                                                                                                                                                                                                                                                                                                                                                                                                                                                                                                                                                                                                                                                                     | 1879.9819 | 1879.9527 | 15.5   | 1237  | - 1253 | 1    | ---  | K.EEADVIVNSTKSFNLK.A      |
| 2157.0273                                                                                                                                                                                                                                                                                                                                                                                                                                                                                                                                                                                                                                                                                     | 2156.0200 | 2156.1478 | -59.24 | 83    | - 101  | 1    | ---  | K.GTFKLTQIPTVPDEVQER.K    |
| 2157.0273                                                                                                                                                                                                                                                                                                                                                                                                                                                                                                                                                                                                                                                                                     | 2156.0201 | 2156.1478 | -59.22 | 83    | - 101  | 1    | 26   | K.GTFKLTQIPTVPDEVQER.K    |
| 2211.0493                                                                                                                                                                                                                                                                                                                                                                                                                                                                                                                                                                                                                                                                                     | 2210.0420 | 2210.2271 | -83.72 | 1056  | - 1076 | 1    | ---  | K.LQEELKTAGQGVVVDVGTVLR.T |
| No match to: 842.4847, 845.4012, 848.4952, 850.5135, 853.4918, 857.4026, 857.4026, 864.5186, 868.5277, 870.5200, 951.5951, 987.5186, 996.5623, 1017.6425, 1019.6487, 1033.6698, 1036.5013, 1036.5013, 1045.5382, 1051.6785, 1051.6785, 1083.5225, 1083.5225, 1090.4995, 1107.5156, 1131.6732, 1136.6610, 1151.6952, 1165.5533, 1165.7053, 1179.5667, 1221.5270, 1221.5270, 1263.6616, 1277.6742, 1300.8134, 1334.8459, 1334.8459, 1361.6049, 1379.6898, 1448.8787, 1475.7053, 1479.7522, 1482.7051, 1567.6991, 1618.0178, 1732.0514, 1790.9982, 1790.9982, 1808.9220, 1879.9926, 1890.9176, 1901.2008, 1993.9156, 2064.0874, 2098.0544, 2179.9844, 2283.1272, 2506.2144, 2506.2144, 2598.2195 |           |           |        |       |        |      |      |                           |

24. [A0A3Q1MDH0](#) Mass: 196044 Score: 44 Expect: 5.2 Matches: 17

Poly [ADP-ribose] polymerase OS=Bos taurus OX=9913 GN=PARP14 PE=4 SV=1

| observed                                                                                                                                                                                                                                                                                                                                                                                                                                                                                                                                                                                                                                                                            | Mr(expt)  | Mr(calc)  | ppm    | Start | End    | Miss | Ions | Peptide                  |
|-------------------------------------------------------------------------------------------------------------------------------------------------------------------------------------------------------------------------------------------------------------------------------------------------------------------------------------------------------------------------------------------------------------------------------------------------------------------------------------------------------------------------------------------------------------------------------------------------------------------------------------------------------------------------------------|-----------|-----------|--------|-------|--------|------|------|--------------------------|
| 882.5434                                                                                                                                                                                                                                                                                                                                                                                                                                                                                                                                                                                                                                                                            | 881.5361  | 881.4494  | 98.4   | 1501  | - 1508 | 0    | ---  | K.TYIATDAK.G             |
| 882.5434                                                                                                                                                                                                                                                                                                                                                                                                                                                                                                                                                                                                                                                                            | 881.5361  | 881.4494  | 98.4   | 1501  | - 1508 | 0    | ---  | K.TYIATDAK.G             |
| 996.5623                                                                                                                                                                                                                                                                                                                                                                                                                                                                                                                                                                                                                                                                            | 995.5550  | 995.5011  | 54.2   | 1655  | - 1661 | 1    | ---  | K.KHMYVVR.V              |
| 1124.5784                                                                                                                                                                                                                                                                                                                                                                                                                                                                                                                                                                                                                                                                           | 1123.5711 | 1123.5509 | 18.0   | 306   | - 315  | 0    | ---  | K.DASTLFSDIR.S           |
| 1143.6165                                                                                                                                                                                                                                                                                                                                                                                                                                                                                                                                                                                                                                                                           | 1142.6092 | 1142.6295 | -17.75 | 973   | - 982  | 1    | ---  | K.AGQKLQELK.T            |
| 1162.5488                                                                                                                                                                                                                                                                                                                                                                                                                                                                                                                                                                                                                                                                           | 1161.5415 | 1161.5699 | -24.47 | 1470  | - 1479 | 0    | ---  | K.ITNMQLEDAK.K           |
| 1200.5436                                                                                                                                                                                                                                                                                                                                                                                                                                                                                                                                                                                                                                                                           | 1199.5363 | 1199.6121 | -63.16 | 29    | - 37   | 1    | ---  | K.LQMYFQSRK.R            |
| 1211.6163                                                                                                                                                                                                                                                                                                                                                                                                                                                                                                                                                                                                                                                                           | 1210.6090 | 1210.5618 | 39.0   | 73    | - 82   | 0    | ---  | R.ESHELEWPGK.G           |
| 1211.6163                                                                                                                                                                                                                                                                                                                                                                                                                                                                                                                                                                                                                                                                           | 1210.6091 | 1210.5618 | 39.0   | 73    | - 82   | 0    | ---  | R.ESHELEWPGK.G           |
| 1290.6333                                                                                                                                                                                                                                                                                                                                                                                                                                                                                                                                                                                                                                                                           | 1289.6260 | 1289.6146 | 8.85   | 1185  | - 1195 | 1    | ---  | R.AGRNVEIECSR.Q          |
| 1407.6674                                                                                                                                                                                                                                                                                                                                                                                                                                                                                                                                                                                                                                                                           | 1406.6601 | 1406.7340 | -52.53 | 1341  | - 1352 | 1    | ---  | K.KTELAVFQVCGR.N         |
| 1434.8688                                                                                                                                                                                                                                                                                                                                                                                                                                                                                                                                                                                                                                                                           | 1433.8615 | 1433.8103 | 35.7   | 1216  | - 1228 | 1    | ---  | K.NIIHVIGGNDVKR.S        |
| 1880.9891                                                                                                                                                                                                                                                                                                                                                                                                                                                                                                                                                                                                                                                                           | 1879.9818 | 1879.9527 | 15.5   | 1158  | - 1174 | 1    | ---  | K.EEADVIVNSTKSFNLK.A     |
| 1880.9891                                                                                                                                                                                                                                                                                                                                                                                                                                                                                                                                                                                                                                                                           | 1879.9819 | 1879.9527 | 15.5   | 1158  | - 1174 | 1    | ---  | K.EEADVIVNSTKSFNLK.A     |
| 2157.0273                                                                                                                                                                                                                                                                                                                                                                                                                                                                                                                                                                                                                                                                           | 2156.0200 | 2156.1478 | -59.24 | 83    | - 101  | 1    | ---  | K.GTFKLTVQIPTVPDEVQER.K  |
| 2157.0273                                                                                                                                                                                                                                                                                                                                                                                                                                                                                                                                                                                                                                                                           | 2156.0201 | 2156.1478 | -59.22 | 83    | - 101  | 1    | 26   | K.GTFKLTVQIPTVPDEVQER.K  |
| 2211.0493                                                                                                                                                                                                                                                                                                                                                                                                                                                                                                                                                                                                                                                                           | 2210.0420 | 2210.2271 | -83.72 | 977   | - 997  | 1    | ---  | K.LQEELKTAGQGVVVDGTVLR.T |
| No match to: 842.4847, 845.4012, 848.4952, 850.5135, 853.4918, 857.4026, 857.4026, 864.5186, 868.5277, 870.5200, 951.5951, 987.5186, 1017.6425, 1019.6487, 1033.6698, 1036.5013, 1036.5013, 1045.5382, 1051.6785, 1051.6785, 1083.5225, 1083.5225, 1090.4995, 1107.5156, 1131.6732, 1136.6610, 1151.6952, 1165.5533, 1165.7053, 1179.5667, 1221.5270, 1221.5270, 1263.6616, 1277.6742, 1300.8134, 1334.8459, 1334.8459, 1361.6049, 1379.6898, 1448.8787, 1475.7053, 1479.7522, 1482.7051, 1567.6991, 1618.0178, 1732.0514, 1790.9982, 1790.9982, 1808.9220, 1879.9926, 1890.9176, 1901.2008, 1993.9156, 2064.0874, 2098.0544, 2179.9844, 2283.1272, 2506.2144, 2506.2144, 2598.2195 |           |           |        |       |        |      |      |                          |

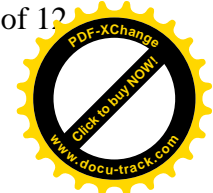

**A0A4W2E5T5**      **Mass:** 31943      **Score:** 44      **Expect:** 5.6      **Matches:** 10

Phosphatidylinositol transfer protein beta OS=Bos indicus x Bos taurus OX=30522 GN=PITPNB PE=4 SV=1

[illegible]

26. [A0A452DJF3](#) Mass: 31845 Score: 43 Expect: 7.1 Matches: 11

Phosphatidylinositol transfer protein beta isoform OS=Bos taurus OX=9913 GN=PITPNB PE=4 SV=1

[illegible]

27. [A0A4W2DWE1](#) Mass: 8549 Score: 41 Expect: 10 Matches: 5

CD3e molecule OS=Bos indicus x Bos taurus OX=30522 GN=CD3E PE=4 SV=1

[illegible]

28. [A0A3Q1MWW7](#) Mass: 28595 Score: 40 Expect: 13 Matches: 7

Electron transfer flavoprotein subunit beta lysine methyltransferase OS=Bos taurus OX=9913 GN=ETFBKMT PE=4 SV=1

| Observed                                                                                                                                                                                                                                                                                                                                                                                                                                                                                                                                                                                                                                                                                                                                                         | Mr(expt)  | Mr(calc)  | ppm    | Start                | End | Miss | Tons  | Peptide                          |
|------------------------------------------------------------------------------------------------------------------------------------------------------------------------------------------------------------------------------------------------------------------------------------------------------------------------------------------------------------------------------------------------------------------------------------------------------------------------------------------------------------------------------------------------------------------------------------------------------------------------------------------------------------------------------------------------------------------------------------------------------------------|-----------|-----------|--------|----------------------|-----|------|-------|----------------------------------|
| 868.5277                                                                                                                                                                                                                                                                                                                                                                                                                                                                                                                                                                                                                                                                                                                                                         | 867.5204  | 867.5654  | -51.84 | 58                   | -   | 64   | 1 --- | R.LRLLTPR.C                      |
| 870.5200                                                                                                                                                                                                                                                                                                                                                                                                                                                                                                                                                                                                                                                                                                                                                         | 869.5127  | 869.4759  | 42.3   | 72                   | -   | 78   | 0 --- | R.ADLWPLR.D                      |
| 1162.5488                                                                                                                                                                                                                                                                                                                                                                                                                                                                                                                                                                                                                                                                                                                                                        | 1161.5415 | 1161.6064 | -55.81 | 27                   | -   | 37   | 1 --- | R.GTGLSLDPPKMK.A + Oxidation (M) |
| 1879.9926                                                                                                                                                                                                                                                                                                                                                                                                                                                                                                                                                                                                                                                                                                                                                        | 1878.9853 | 1878.9053 | 42.6   | 79                   | -   | 94   | 0 --- | R.DPYWAIIYWPQGQALSR.Y            |
| 2157.0273                                                                                                                                                                                                                                                                                                                                                                                                                                                                                                                                                                                                                                                                                                                                                        | 2156.0200 | 2156.0527 | -15.15 | 9                    | -   | 26   | 1 --- | R.AVRSSGFFLPFWGHCPWR.G           |
| 2157.0273                                                                                                                                                                                                                                                                                                                                                                                                                                                                                                                                                                                                                                                                                                                                                        | 2156.0201 | 2156.0527 | -15.13 | 9                    | -   | 26   | 1 7   | R.AVRSSGFFLPFWGHCPWR.G           |
| 2179.9844                                                                                                                                                                                                                                                                                                                                                                                                                                                                                                                                                                                                                                                                                                                                                        | 2178.9771 | 2179.0644 | -40.07 | 38                   | -   | 57   | 0 --- | K.AFLEENTEVTSSGSILTPEIR.L        |
| No match to: 842.4847, 845.4012, 848.4952, 850.5135, 853.4918, 857.4026, 857.4026, 864.5186, 882.5434, 882.5434, 951.5951, 987.5186, 996.5623, 1017.6425, 1019.6487, 1033.6698, 1036.5013, 1036.5013, 1045.5382, 1051.6785, 1051.6785, 1083.5225, 1083.5225, 1090.4995, 1107.5156, 1124.5784, 1131.6732, 1136.6610, 1143.6165, 1151.6952, 1165.5533, 1165.7053, 1179.5667, 1200.5436, 1211.6163, 1211.6163, 1221.5270, 1221.5270, 1236.6616, 1277.6742, 1290.6333, 1300.8134, 1334.8459, 1334.8459, 1361.6049, 1379.6898, 1407.6674, 1434.8688, 1448.8787, 1475.7053, 1479.7522, 1482.7051, 1567.6991, 1618.0178, 1732.0514, 1790.9982, 1790.9982, 1808.9220, 1880.9891, 1880.9891, 1890.9176, 1901.2008, 1993.9156, 2064.0874, 2098.0544, 2211.0493, 2283.1272. |           |           |        |                      |     |      |       |                                  |
| 2506.2144.                                                                                                                                                                                                                                                                                                                                                                                                                                                                                                                                                                                                                                                                                                                                                       |           |           |        | 2506.2144. 2598.2195 |     |      |       |                                  |

29. [A0A3Q1M1B1](#) Mass: 29199 Score: 40 Expect: 14 Matches: 9

Phosphatidylinositol transfer protein beta isoform OS=Bos taurus OX=9913 GN=PITPNB PE=4 SV=1

[illegible]

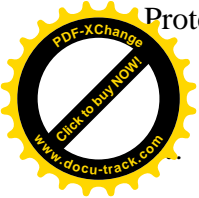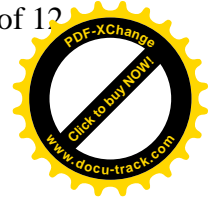

**Q8MII7** Mass: 4845 Score: 40 Expect: 15 Matches: 4

Insulin receptor (Fragment) OS=Bos taurus OX=9913 GN=ir-A PE=2 SV=1

| Observed  | Mr(expt)  | Mr(calc)  | ppm  | Start | End | Miss | Ions | Peptide          |
|-----------|-----------|-----------|------|-------|-----|------|------|------------------|
| 987.5186  | 986.5113  | 986.5033  | 8.15 | 32    | -   | 42   | 0    | R.ALGDVGNVTAA.-  |
| 996.5623  | 995.5550  | 995.4560  | 99.5 | 3     | -   | 10   | 0    | K.ELEESSFR.K     |
| 1124.5784 | 1123.5711 | 1123.5509 | 18.0 | 3     | -   | 11   | 1    | K.ELEESSFRK.T    |
| 1143.6165 | 1142.6092 | 1142.6044 | 4.24 | 31    | -   | 42   | 1    | R.RALGDVGNVTAA.- |

No match to: 842.4847, 845.4012, 848.4952, 850.5135, 853.4918, 857.4026, 857.4026, 864.5186, 868.5277, 870.5200, 882.5434, 882.5434, 951.5951, 1017.6425, 1019.6487, 1033.6698, 1036.5013, 1036.5013, 1045.5382, 1051.6785, 1051.6785, 1083.5225, 1083.5225, 1090.4995, 1107.5156, 1131.6732, 1136.6610, 1151.6952, 1162.5488, 1165.5533, 1165.7053, 1179.5667, 1200.5436, 1211.6163, 1211.6163, 1221.5270, 1221.5270, 1263.6616, 1277.6742, 1290.6333, 1300.8134, 1334.8459, 1334.8459, 1361.6049, 1379.6898, 1407.6674, 1434.8688, 1448.8787, 1475.7053, 1479.7522, 1482.7051, 1567.6991, 1618.0178, 1732.0514, 1790.9982, 1790.9982, 1808.9220, 1879.9926, 1880.9891, 1880.9891, 1890.9176, 1901.2008, 1993.9156, 2064.0874, 2098.0544, 2157.0273, 2157.0273, 2179.9844, 2211.0493, 2283.1272, 2506.2144, 2506.2144, 2598.2195

## Search Parameters

Type of search : Sequence Query  
Enzyme : Trypsin  
Fixed modifications : [Carbamidomethyl \(C\)](#)  
Variable modifications : [Oxidation \(M\)](#)  
Mass values : Monoisotopic  
Protein Mass : Unrestricted  
Peptide Mass Tolerance :  $\pm 100$  ppm  
Fragment Mass Tolerance :  $\pm 0.3$  Da  
Max Missed Cleavages : 1  
Instrument type : MALDI-TOF-TOF  
Query1 (842.4847,1+): <no title>  
Query2 (845.4012,1+): <no title>  
Query3 (848.4952,1+): <no title>  
Query4 (850.5135,1+): <no title>  
Query5 (853.4918,1+): <no title>  
Query6 (857.4026,1+): Locus:1..14.0.12  
Query7 (857.4026,1+): <no title>  
Query8 (864.5186,1+): <no title>  
Query9 (868.5277,1+): <no title>  
Query10 (870.5200,1+): <no title>  
Query11 (882.5434,1+): <no title>  
Query12 (882.5434,1+): Locus:1..14.0.9  
Query13 (951.5951,1+): <no title>  
Query14 (987.5186,1+): <no title>  
Query15 (996.5623,1+): <no title>  
Query16 (1017.6425,1+): <no title>  
Query17 (1019.6487,1+): <no title>  
Query18 (1033.6698,1+): <no title>  
Query19 (1036.5013,1+): <no title>  
Query20 (1036.5013,1+): Locus:1..14.0.10  
Query21 (1045.5382,1+): <no title>  
Query22 (1051.6785,1+): Locus:1..14.0.5  
Query23 (1051.6785,1+): <no title>  
Query24 (1083.5225,1+): Locus:1..14.0.3  
Query25 (1083.5225,1+): <no title>  
Query26 (1090.4995,1+): <no title>  
Query27 (1107.5156,1+): <no title>  
Query28 (1124.5784,1+): <no title>  
Query29 (1131.6732,1+): <no title>  
Query30 (1136.6610,1+): <no title>  
Query31 (1143.6165,1+): <no title>  
Query32 (1151.6952,1+): <no title>  
Query33 (1162.5488,1+): <no title>  
Query34 (1165.5533,1+): <no title>  
Query35 (1165.7053,1+): <no title>  
Query36 (1179.5667,1+): <no title>  
Query37 (1200.5436,1+): <no title>  
Query38 (1211.6163,1+): <no title>  
Query39 (1211.6163,1+): Locus:1..14.0.11  
Query40 (1221.5270,1+): Locus:1..14.0.4  
Query41 (1221.5270,1+): <no title>  
Query42 (1263.6616,1+): <no title>  
Query43 (1277.6742,1+): <no title>  
Query44 (1290.6333,1+): <no title>  
Query45 (1300.8134,1+): <no title>  
Query46 (1334.8459,1+): <no title>  
Query47 (1334.8459,1+): Locus:1..14.0.8  
Query48 (1361.6049,1+): <no title>  
Query49 (1379.6898,1+): <no title>  
Query50 (1407.6674,1+): <no title>  
Query51 (1434.8688,1+): <no title>  
Query52 (1448.8787,1+): <no title>  
Query53 (1475.7053,1+): <no title>  
Query54 (1479.7522,1+): <no title>  
Query55 (1482.7051,1+): <no title>  
Query56 (1567.6991,1+): <no title>  
Query57 (1618.0178,1+): <no title>  
Query58 (1732.0514,1+): <no title>  
Query59 (1790.9982,1+): Locus:1..14.0.2  
Query60 (1790.9982,1+): <no title>  
Query61 (1808.9220,1+): <no title>  
Query62 (1879.9926,1+): <no title>  
Query63 (1880.9891,1+): <no title>  
Query64 (1880.9891,1+): Locus:1..14.0.1  
Query65 (1890.9176,1+): <no title>  
Query66 (1901.2008,1+): <no title>  
Query67 (1993.9156,1+): <no title>  
Query68 (2064.0874,1+): <no title>  
Query69 (2098.0544,1+): <no title>  
Query70 (2157.0273,1+): <no title>  
Query71 (2157.0273,1+): Locus:1..14.0.6  
Query72 (2179.9844,1+): <no title>  
Query73 (2211.0493,1+): <no title>  
Query74 (2283.1272,1+): <no title>  
Query75 (2506.2144,1+): Locus:1..14.0.7  
Query76 (2506.2144,1+): <no title>  
Query77 (2598.2195,1+): <no title>

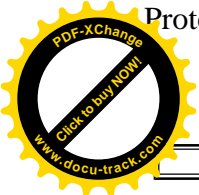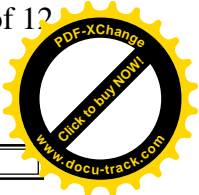

Mascot: <http://www.matrixscience.com/>
