# Supplementary material for: Alpha-2-Macroglobulin as a New Promising Biomarker Improving the Diagnostic Sensitivity of Bovine Paratuberculosis
Source: Frontiers journal article supplement (doi:10.3389/fvets.2021.637716), 2021-03-05
Supplement: Data_Sheet_1.zip [file Data_Sheet_1.zip]

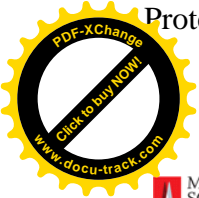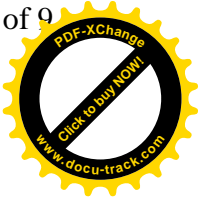

# Mascot Search Results

User :  
Email :  
Search title : BAEDW\2020\_3\_5\2020\_3\_5\MSMS 14\N3  
Database : Uniprot\_bovine\_bovine\_20200316 (134392 sequences; 76244912 residues)  
Timestamp : 31 Mar 2020 at 01:08:22 GMT  
Warning : A Peptide summary report will usually give a much clearer picture of MS/MS search results.  
Top Score : 88 for A0A4W2BU20, Transthyretin OS=Bos indicus x Bos taurus OX=30522 GN=TTR PE=3 SV=1

## Mascot Score Histogram

Protein score is  $-10 \cdot \log(P)$ , where P is the probability that the observed match is a random event.  
Protein scores greater than 64 are significant ( $p < 0.05$ ).  
Protein scores are derived from ion scores as a non-probabilistic basis for ranking protein hits.

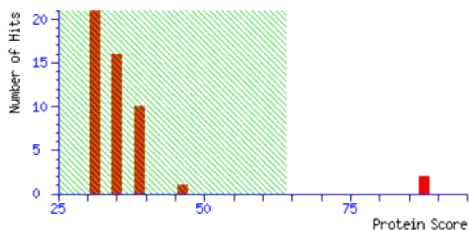

## Protein Summary Report

Format As Protein Summary (deprecated) [Help](#)

Significance threshold  $p < 0.05$  Max. number of hits 30

Preferred taxonomy All entries

[Re-Search All](#) [Search Unmatched](#)

## Index

| Accession                      | Mass   | Score | Description                                                                                                                     |
|--------------------------------|--------|-------|---------------------------------------------------------------------------------------------------------------------------------|
| 1. <a href="#">A0A4W2BU20</a>  | 15831  | 88    | Transthyretin OS=Bos indicus x Bos taurus OX=30522 GN=TTR PE=3 SV=1                                                             |
| 2. <a href="#">O46375</a>      | 15831  | 88    | Transthyretin OS=Bos taurus OX=9913 GN=TTR PE=1 SV=1                                                                            |
| 3. <a href="#">A0A4W2HSZ8</a>  | 42719  | 47    | Family with sequence similarity 50 member A OS=Bos indicus x Bos taurus OX=30522 GN=FAM50A PE=4 SV=1                            |
| 4. <a href="#">A0A4W2DZA0</a>  | 147145 | 40    | SRC kinase signaling inhibitor 1 OS=Bos indicus x Bos taurus OX=30522 GN=SRCIN1 PE=4 SV=1                                       |
| 5. <a href="#">A0A3Q1ME33</a>  | 130395 | 40    | SRC kinase signaling inhibitor 1 OS=Bos taurus OX=9913 GN=SRCIN1 PE=4 SV=1                                                      |
| 6. <a href="#">A0A4W2F662</a>  | 130890 | 38    | SRC kinase signaling inhibitor 1 OS=Bos indicus x Bos taurus OX=30522 GN=SRCIN1 PE=4 SV=1                                       |
| 7. <a href="#">A0A4W2FSP5</a>  | 32222  | 38    | TATA-box binding protein associated factor, RNA polymerase I subunit D OS=Bos indicus x Bos taurus OX=30522 GN=SRCIN1 PE=4 SV=1 |
| 8. <a href="#">Q32LB6</a>      | 32222  | 38    | TATA box-binding protein-associated factor RNA polymerase I subunit D OS=Bos taurus OX=9913 GN=TAF1D PE=4 SV=1                  |
| 9. <a href="#">A0A3Q1LZS3</a>  | 135577 | 38    | SRC kinase signaling inhibitor 1 OS=Bos taurus OX=9913 GN=SRCIN1 PE=4 SV=1                                                      |
| 10. <a href="#">A0A4W2EDE8</a> | 135577 | 38    | SRC kinase signaling inhibitor 1 OS=Bos indicus x Bos taurus OX=30522 GN=SRCIN1 PE=4 SV=1                                       |
| 11. <a href="#">A0A3Q1MIM5</a> | 16207  | 37    | Uncharacterized protein OS=Bos taurus OX=9913 PE=4 SV=1                                                                         |
| 12. <a href="#">A0A452DJF3</a> | 13845  | 37    | Phosphatidylinositol transfer protein beta isoform OS=Bos taurus OX=9913 GN=PITPNB PE=4 SV=1                                    |
| 13. <a href="#">A0A3Q1N5E1</a> | 133286 | 37    | SRC kinase signaling inhibitor 1 OS=Bos taurus OX=9913 GN=SRCIN1 PE=4 SV=1                                                      |
| 14. <a href="#">A0A4W2E9X7</a> | 28070  | 37    | Family with sequence similarity 166 member B OS=Bos indicus x Bos taurus OX=30522 GN=FAM166B PE=4 SV=1                          |
| 15. <a href="#">A0A4W2FA54</a> | 140160 | 36    | Calmodulin regulated spectrin associated protein 1 OS=Bos indicus x Bos taurus OX=30522 GN=CAMSAP1 PE=3 SV=1                    |
| 16. <a href="#">A0A4W2GH39</a> | 119304 | 36    | MCF.2 cell line derived transforming sequence-like 2 OS=Bos indicus x Bos taurus OX=30522 GN=MCF2L2 PE=4 SV=1                   |
| 17. <a href="#">A0A4W2P647</a> | 127627 | 36    | SRC kinase signaling inhibitor 1 OS=Bos indicus x Bos taurus OX=30522 GN=SRCIN1 PE=4 SV=1                                       |
| 18. <a href="#">A0A4W2DZ95</a> | 132512 | 35    | SRC kinase signaling inhibitor 1 OS=Bos indicus x Bos taurus OX=30522 GN=SRCIN1 PE=4 SV=1                                       |
| 19. <a href="#">A0A4W2CC31</a> | 172499 | 35    | Calmodulin regulated spectrin associated protein 1 OS=Bos indicus x Bos taurus OX=30522 GN=CAMSAP1 PE=3 SV=1                    |
| 20. <a href="#">A0A3Q1N0Q9</a> | 136628 | 35    | SRC kinase signaling inhibitor 1 OS=Bos taurus OX=9913 GN=SRCIN1 PE=4 SV=1                                                      |
| 21. <a href="#">A0A4W2GMF0</a> | 148991 | 35    | Coiled-coil domain containing 171 OS=Bos indicus x Bos taurus OX=30522 GN=CCDC171 PE=4 SV=1                                     |
| 22. <a href="#">A0A3Q1LVB1</a> | 134506 | 34    | SRC kinase signaling inhibitor 1 OS=Bos taurus OX=9913 GN=SRCIN1 PE=4 SV=1                                                      |
| 23. <a href="#">Q80RC9</a>     | 50101  | 34    | Bo17 (Fragment) OS=Bovine herpesvirus 4 OX=10385 GN=Bo17 PE=4 SV=1                                                              |
| 24. <a href="#">Q80RD0</a>     | 49973  | 34    | Bo17 (Fragment) OS=Bovine herpesvirus 4 OX=10385 GN=Bo17 PE=4 SV=1                                                              |
| 25. <a href="#">A0A4W2IBB1</a> | 60650  | 34    | RIC8 guanine nucleotide exchange factor B OS=Bos indicus x Bos taurus OX=30522 GN=RIC8B PE=4 SV=1                               |
| 26. <a href="#">A0A4W2GM11</a> | 61548  | 33    | RIC8 guanine nucleotide exchange factor B OS=Bos indicus x Bos taurus OX=30522 GN=RIC8B PE=4 SV=1                               |
| 27. <a href="#">E1BP35</a>     | 61548  | 33    | RIC8 guanine nucleotide exchange factor B OS=Bos taurus OX=9913 GN=RIC8B PE=4 SV=1                                              |
| 28. <a href="#">A0A3Q1M3W0</a> | 173871 | 33    | Calmodulin regulated spectrin associated protein 1 OS=Bos taurus OX=9913 GN=CAMSAP1 PE=3 SV=1                                   |
| 29. <a href="#">A0A4W2DJY5</a> | 62224  | 33    | RIC8 guanine nucleotide exchange factor B OS=Bos indicus x Bos taurus OX=30522 GN=RIC8B PE=4 SV=1                               |
| 30. <a href="#">A0A4W2F4T9</a> | 128155 | 33    | SRC kinase signaling inhibitor 1 OS=Bos indicus x Bos taurus OX=30522 GN=SRCIN1 PE=4 SV=1                                       |

## Results List

|                                                                                                                                                                                                                                                                                                                                                                                                                                                                                                                                                                                                                                                                                                                                                                                                        |                            |             |           |                 |                                   |
|--------------------------------------------------------------------------------------------------------------------------------------------------------------------------------------------------------------------------------------------------------------------------------------------------------------------------------------------------------------------------------------------------------------------------------------------------------------------------------------------------------------------------------------------------------------------------------------------------------------------------------------------------------------------------------------------------------------------------------------------------------------------------------------------------------|----------------------------|-------------|-----------|-----------------|-----------------------------------|
| 1.                                                                                                                                                                                                                                                                                                                                                                                                                                                                                                                                                                                                                                                                                                                                                                                                     | <a href="#">A0A4W2BU20</a> | Mass: 15831 | Score: 88 | Expect: 0.00024 | Matches: 5                        |
| Transthyretin OS=Bos indicus x Bos taurus OX=30522 GN=TTR PE=3 SV=1                                                                                                                                                                                                                                                                                                                                                                                                                                                                                                                                                                                                                                                                                                                                    |                            |             |           |                 |                                   |
| Observed                                                                                                                                                                                                                                                                                                                                                                                                                                                                                                                                                                                                                                                                                                                                                                                               | Mr(expt)                   | Mr(calc)    | ppm       | Start           | End Miss Ions Peptide             |
| 1408.5692                                                                                                                                                                                                                                                                                                                                                                                                                                                                                                                                                                                                                                                                                                                                                                                              | 1407.5619                  | 1407.6306   | -48.82    | 56 - 68         | 0 --- K.AAETWEPFASGK.T            |
| 1408.5692                                                                                                                                                                                                                                                                                                                                                                                                                                                                                                                                                                                                                                                                                                                                                                                              | 1407.5619                  | 1407.6306   | -48.81    | 56 - 68         | 0 --- K.AAETWEPFASGK.T            |
| 2470.2014                                                                                                                                                                                                                                                                                                                                                                                                                                                                                                                                                                                                                                                                                                                                                                                              | 2469.1941                  | 2469.2791   | -34.42    | 124 - 146       | 0 --- R.HYTIAALLSPYSYSTTALVSSPK.A |
| 2477.1138                                                                                                                                                                                                                                                                                                                                                                                                                                                                                                                                                                                                                                                                                                                                                                                              | 2476.1065                  | 2476.2023   | -38.69    | 101 - 123       | 0 66 K.SLGISPFHEFAEVVFTANDSGPR.H  |
| 2477.1138                                                                                                                                                                                                                                                                                                                                                                                                                                                                                                                                                                                                                                                                                                                                                                                              | 2476.1065                  | 2476.2023   | -38.68    | 101 - 123       | 0 --- K.SLGISPFHEFAEVVFTANDSGPR.H |
| No match to: 811.4696, 842.4688, 848.4903, 850.0149, 850.5021, 853.4834, 856.4824, 864.4868, 865.9890, 868.5110, 870.5007, 876.9973, 882.5262, 882.5263, 892.9677, 951.5844, 953.5057, 996.5507, 1017.6264, 1017.6264, 1033.6548, 1033.6548, 1045.5144, 1045.5144, 1051.6622, 1051.6622, 1131.6659, 1133.6655, 1147.6840, 1151.6809, 1165.6895, 1165.6895, 1179.5537, 1236.6508, 1300.7965, 1302.7620, 1307.6320, 1316.8201, 1334.8311, 1334.8311, 1427.7416, 1430.5653, 1448.8605, 1448.8605, 1457.6237, 1475.6832, 1617.9929, 1617.9929, 1732.0273, 1775.7623, 1901.1764, 1940.8547, 1993.8938, 2056.9478, 2193.0378, 2211.0134, 2221.0344, 2225.0469, 2230.1272, 2233.0085, 2239.0554, 2248.9812, 2261.0361, 2265.0583, 2283.0833, 2305.0723, 2321.0693, 2459.1550, 2492.1714, 2499.1167, 3337.7234 |                            |             |           |                 |                                   |
| 2.                                                                                                                                                                                                                                                                                                                                                                                                                                                                                                                                                                                                                                                                                                                                                                                                     | <a href="#">O46375</a>     | Mass: 15831 | Score: 88 | Expect: 0.00024 | Matches: 5                        |
| Transthyretin OS=Bos taurus OX=9913 GN=TTR PE=1 SV=1                                                                                                                                                                                                                                                                                                                                                                                                                                                                                                                                                                                                                                                                                                                                                   |                            |             |           |                 |                                   |
| Observed                                                                                                                                                                                                                                                                                                                                                                                                                                                                                                                                                                                                                                                                                                                                                                                               | Mr(expt)                   | Mr(calc)    | ppm       | Start           | End Miss Ions Peptide             |
| 1408.5692                                                                                                                                                                                                                                                                                                                                                                                                                                                                                                                                                                                                                                                                                                                                                                                              | 1407.5619                  | 1407.6306   | -48.82    | 56 - 68         | 0 --- K.AAETWEPFASGK.T            |

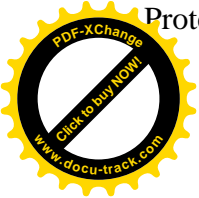

|                                                                                                                                                                                                                                                                                                                                                                                                                                                                                                                                                                                                                                                                                                                                                                                                               |           |           |        |     |   |     |   |     |                               |
|---------------------------------------------------------------------------------------------------------------------------------------------------------------------------------------------------------------------------------------------------------------------------------------------------------------------------------------------------------------------------------------------------------------------------------------------------------------------------------------------------------------------------------------------------------------------------------------------------------------------------------------------------------------------------------------------------------------------------------------------------------------------------------------------------------------|-----------|-----------|--------|-----|---|-----|---|-----|-------------------------------|
| 1408.5692                                                                                                                                                                                                                                                                                                                                                                                                                                                                                                                                                                                                                                                                                                                                                                                                     | 1407.5619 | 1407.6306 | -48.81 | 56  | - | 68  | 0 | --- | K.AAETWEFFASGK.T              |
| 2470.2014                                                                                                                                                                                                                                                                                                                                                                                                                                                                                                                                                                                                                                                                                                                                                                                                     | 2469.1941 | 2469.2791 | -34.42 | 124 | - | 146 | 0 | --- | R.HYTIAALLSPYSYSTALTALVSSPK.A |
| 2477.1138                                                                                                                                                                                                                                                                                                                                                                                                                                                                                                                                                                                                                                                                                                                                                                                                     | 2476.1065 | 2476.2023 | -38.69 | 101 | - | 123 | 0 | 66  | K.SLGISPFHEFAEVVFTANDSGPR.H   |
| 2477.1138                                                                                                                                                                                                                                                                                                                                                                                                                                                                                                                                                                                                                                                                                                                                                                                                     | 2476.1065 | 2476.2023 | -38.68 | 101 | - | 123 | 0 | --- | K.SLGISPFHEFAEVVFTANDSGPR.H   |
| <b>No match to:</b> 811.4696, 842.4688, 848.4903, 850.0149, 850.5021, 853.4834, 856.4824, 864.4868, 865.9890, 868.5110, 870.5007, 876.9973, 882.5262, 882.5263, 892.9677, 951.5844, 953.5057, 996.5507, 1017.6264, 1017.6264, 1033.6548, 1033.6548, 1045.5144, 1045.5144, 1051.6622, 1051.6622, 1131.6659, 1131.6655, 1147.6840, 1151.6809, 1165.6895, 1165.6895, 1179.5537, 1236.6508, 1300.7965, 1302.8025, 1307.6320, 1316.8201, 1334.8311, 1334.8311, 1427.7416, 1430.5653, 1448.8605, 1448.8605, 1457.6237, 1475.6832, 1617.9929, 1617.9929, 1732.0273, 1775.7623, 1901.1764, 1940.8547, 1993.8938, 2056.9478, 2193.0378, 2211.0134, 2221.0344, 2225.0469, 2230.1272, 2233.0085, 2239.0554, 2248.9812, 2261.0361, 2265.0583, 2283.0833, 2305.0723, 2321.0693, 2459.1550, 2492.1714, 2499.1167, 3337.7234 |           |           |        |     |   |     |   |     |                               |

3. [A0A4W2HSZ8](#) Mass: 42719 Score: 47 Expect: 2.9 Matches: 9  
Family with sequence similarity 50 member A OS=Bos indicus x Bos taurus OX=30522 GN=FAM50A PE=4 SV=1

| observed                                                                                                                                                                                                                                                                                                                                                                                                                                                                                                                                                                                                                                                                                                                                                            | Mr(expt)  | Mr(calc)  | pppm   | Start | End | Miss | Ions  | Peptide                      |
|---------------------------------------------------------------------------------------------------------------------------------------------------------------------------------------------------------------------------------------------------------------------------------------------------------------------------------------------------------------------------------------------------------------------------------------------------------------------------------------------------------------------------------------------------------------------------------------------------------------------------------------------------------------------------------------------------------------------------------------------------------------------|-----------|-----------|--------|-------|-----|------|-------|------------------------------|
| 842.4688                                                                                                                                                                                                                                                                                                                                                                                                                                                                                                                                                                                                                                                                                                                                                            | 841.4615  | 841.5385  | -91.47 | 258   | -   | 264  | 1 --- | K.ALEILRK.D                  |
| 848.4903                                                                                                                                                                                                                                                                                                                                                                                                                                                                                                                                                                                                                                                                                                                                                            | 847.4830  | 847.4651  | 21.2   | 175   | -   | 181  | 1 --- | R.EEITTKK.K                  |
| 1179.5537                                                                                                                                                                                                                                                                                                                                                                                                                                                                                                                                                                                                                                                                                                                                                           | 1178.5464 | 1178.6448 | -83.44 | 334   | -   | 342  | 1 --- | K.VVLRSWYEK.N                |
| 1775.7623                                                                                                                                                                                                                                                                                                                                                                                                                                                                                                                                                                                                                                                                                                                                                           | 1774.7550 | 1774.8308 | -42.71 | 34    | -   | 50   | 0 --- | K.EYSCNAGDLGLIPGGR.S         |
| 2211.0134                                                                                                                                                                                                                                                                                                                                                                                                                                                                                                                                                                                                                                                                                                                                                           | 2210.0061 | 2210.1160 | -49.73 | 282   | -   | 299  | 0 --- | K.EDLIIPHHHSFYDFIVTK.A       |
| 2321.0693                                                                                                                                                                                                                                                                                                                                                                                                                                                                                                                                                                                                                                                                                                                                                           | 2320.0620 | 2320.1158 | -23.16 | 58    | -   | 78   | 0 --- | R.YPLQYSGLDNSMDNIVHGVAK.N    |
| 2477.1138                                                                                                                                                                                                                                                                                                                                                                                                                                                                                                                                                                                                                                                                                                                                                           | 2476.1065 | 2476.3301 | -90.29 | 2     | -   | 24   | 0 --- | M.PPPSLYPCPLDHAVIGPHLVKLVK.G |
| 2477.1138                                                                                                                                                                                                                                                                                                                                                                                                                                                                                                                                                                                                                                                                                                                                                           | 2476.1065 | 2476.2169 | -44.56 | 57    | -   | 78   | 1 --- | K.RYPLQYSGLDNSMDNIVHGVAK.N   |
| 2499.1167                                                                                                                                                                                                                                                                                                                                                                                                                                                                                                                                                                                                                                                                                                                                                           | 2498.1094 | 2498.2516 | -56.90 | 83    | -   | 104  | 1 --- | R.LSDFDFTHTVGLVTNLDMKAK.Q    |
| <b>No match to:</b> 811.4696, 850.0149, 850.5021, 853.4834, 856.4824, 864.4868, 865.9890, 868.5110, 870.5007, 876.9973, 882.5262, 882.5263, 892.9677, 951.5844, 953.5057, 996.5507, 1017.6264, 1017.6264, 1033.6548, 1033.6548, 1045.5144, 1045.5144, 1051.6622, 1051.6622, 1131.6659, 1133.6655, 1147.6840, 1151.6809, 1165.6895, 1165.6895, 1236.6508, 1300.7965, 1302.8025, 1307.6320, 1316.8201, 1334.8311, 1334.8311, 1408.5692, 1408.5692, 1427.7416, 1430.5653, 1448.8605, 1448.8605, 1457.6237, 1475.6832, 1617.9929, 1617.9929, 1732.0273, 1901.1764, 1940.8547, 1993.8938, 2056.9478, 2193.0378, 2221.0344, 2225.0469, 2230.1272, 2233.0085, 2239.0554, 2248.9812, 2261.0361, 2265.0583, 2283.0833, 2305.0723, 2459.1550, 2470.2014, 2492.1714, 3337.7234 |           |           |        |       |     |      |       |                              |

4. [A0A4W2DZA0](#) Mass: 147145 Score: 40 Expect: 13 Matches: 19  
SRC kinase signaling inhibitor 1 OS=Bos indicus x Bos taurus OX=30522 GN=SRCIN1 PE=4 SV=1

| observed                                                                                                                                                                                                                                                                                                                                                                                                                                                                                                                                                                                                                                        | Mr(expt)  | Mr(calc)  | ppm    | Start | End | Miss | Ions | Peptide                                         |
|-------------------------------------------------------------------------------------------------------------------------------------------------------------------------------------------------------------------------------------------------------------------------------------------------------------------------------------------------------------------------------------------------------------------------------------------------------------------------------------------------------------------------------------------------------------------------------------------------------------------------------------------------|-----------|-----------|--------|-------|-----|------|------|-------------------------------------------------|
| 853.4834                                                                                                                                                                                                                                                                                                                                                                                                                                                                                                                                                                                                                                        | 852.4761  | 852.4705  | 6.59   | 436   | -   | 443  | 0    | --- R.LPPSSSPQK.L                               |
| 864.4868                                                                                                                                                                                                                                                                                                                                                                                                                                                                                                                                                                                                                                        | 863.4795  | 863.3998  | 92.3   | 712   | -   | 718  | 0    | --- R.DVSHNHR.L                                 |
| 953.5057                                                                                                                                                                                                                                                                                                                                                                                                                                                                                                                                                                                                                                        | 952.4984  | 952.4548  | 45.8   | 1320  | -   | 1326 | 1    | --- K.QRAEYMR.I                                 |
| 1033.6548                                                                                                                                                                                                                                                                                                                                                                                                                                                                                                                                                                                                                                       | 1032.6475 | 1032.5465 | 97.9   | 468   | -   | 476  | 1    | --- R.GSPVRQSFR.K                               |
| 1033.6548                                                                                                                                                                                                                                                                                                                                                                                                                                                                                                                                                                                                                                       | 1032.6475 | 1032.5465 | 97.9   | 468   | -   | 476  | 1    | --- R.GSPVRQSFR.K                               |
| 1131.6659                                                                                                                                                                                                                                                                                                                                                                                                                                                                                                                                                                                                                                       | 1130.6586 | 1130.6183 | 35.7   | 734   | -   | 743  | 0    | --- K.QLGETLTTELK.A                             |
| 1300.7965                                                                                                                                                                                                                                                                                                                                                                                                                                                                                                                                                                                                                                       | 1299.7892 | 1299.6783 | 85.4   | 1302  | -   | 1314 | 1    | --- R.LKTAQQGAGSPDK.G                           |
| 1408.5692                                                                                                                                                                                                                                                                                                                                                                                                                                                                                                                                                                                                                                       | 1407.5619 | 1407.6664 | -74.20 | 867   | -   | 879  | 1    | --- R.SMDKAVSVEAAER.D + Oxidation (M)           |
| 1408.5692                                                                                                                                                                                                                                                                                                                                                                                                                                                                                                                                                                                                                                       | 1407.5619 | 1407.6664 | -74.19 | 867   | -   | 879  | 1    | --- R.SMDKAVSVEAAER.D + Oxidation (M)           |
| 1427.7416                                                                                                                                                                                                                                                                                                                                                                                                                                                                                                                                                                                                                                       | 1426.7343 | 1426.7780 | -30.58 | 196   | -   | 208  | 1    | --- K.SPNTAILIKDEAR.N                           |
| 1448.8605                                                                                                                                                                                                                                                                                                                                                                                                                                                                                                                                                                                                                                       | 1447.8532 | 1447.7208 | 91.4   | 1192  | -   | 1206 | 0    | --- R.GGAGIPSPWGPAPER.T                         |
| 1448.8605                                                                                                                                                                                                                                                                                                                                                                                                                                                                                                                                                                                                                                       | 1447.8532 | 1447.7208 | 91.5   | 1192  | -   | 1206 | 0    | --- R.GGAGIPSPWGPAPER.T                         |
| 1457.6237                                                                                                                                                                                                                                                                                                                                                                                                                                                                                                                                                                                                                                       | 1456.6164 | 1456.6735 | -39.21 | 421   | -   | 435  | 0    | --- K.AAGGGPLYGDGYGFR.L                         |
| 1617.9929                                                                                                                                                                                                                                                                                                                                                                                                                                                                                                                                                                                                                                       | 1616.9856 | 1616.8900 | 59.2   | 11    | -   | 25   | 1    | --- R.VPPQLGWQGPAGVRV.L                         |
| 1617.9929                                                                                                                                                                                                                                                                                                                                                                                                                                                                                                                                                                                                                                       | 1616.9856 | 1616.8900 | 59.2   | 11    | -   | 25   | 1    | --- R.VPPQLGWQGPAGVRV.L                         |
| 1775.7623                                                                                                                                                                                                                                                                                                                                                                                                                                                                                                                                                                                                                                       | 1774.7550 | 1774.7904 | -19.94 | 567   | -   | 585  | 0    | --- K.IEGSNGAATPSAPCGSGSR.S                     |
| 1993.8938                                                                                                                                                                                                                                                                                                                                                                                                                                                                                                                                                                                                                                       | 1992.8865 | 1993.0051 | -59.48 | 1322  | -   | 1338 | 1    | --- R.AEYMRQAQQQATKPSK.E + Oxidation (M)        |
| 2305.0723                                                                                                                                                                                                                                                                                                                                                                                                                                                                                                                                                                                                                                       | 2304.0650 | 2304.2181 | -66.43 | 536   | -   | 556  | 1    | --- R.MEAMEKQIASLTGLVQSALLR.G + Oxidation (M)   |
| 2321.0693                                                                                                                                                                                                                                                                                                                                                                                                                                                                                                                                                                                                                                       | 2320.0620 | 2320.2130 | -65.08 | 536   | -   | 556  | 1    | --- R.MEAMEKQIASLTGLVQSALLR.G + 2 Oxidation (M) |
| No match to: 811.4696, 842.4688, 848.4903, 850.0149, 850.5021, 856.4824, 865.9890, 868.5110, 870.5007, 876.9973, 882.5262, 882.5263, 892.9677, 951.5844, 996.5507, 1017.6264, 1017.6264, 1045.5144, 1045.5144, 1051.6622, 1051.6622, 1133.6655, 1147.6840, 1151.6809, 1165.6895, 1165.6895, 1179.5537, 1236.6508, 1302.8025, 1307.6320, 1316.8201, 1334.8311, 1334.8311, 1430.5653, 1475.6832, 1732.0273, 1901.1764, 1940.8547, 2056.9478, 2193.0378, 2211.0134, 2221.0344, 2225.0469, 2230.1272, 2233.0085, 2239.0554, 2248.9812, 2261.0361, 2265.0583, 2283.0833, 2459.1550, 2470.2014, 2477.1138, 2477.1138, 2492.1714, 2499.1167, 3337.7234 |           |           |        |       |     |      |      |                                                 |

5. [A0A3Q1ME33](#) Mass: 130395 Score: 40 Expect: 14 Matches: 16  
SRC kinase signaling inhibitor 1 OS=Bos taurus OX=9913 GN=SRCIN1 PE=4 SV=1

| observed                                                                                                                                                                                                                                                                                                                                                                                                                                                                                                                                                                                                                                                                         | Mr(expt)  | Mr(calc)  | ppm    | Start | End | Miss | Ions  | Peptide                                     |
|----------------------------------------------------------------------------------------------------------------------------------------------------------------------------------------------------------------------------------------------------------------------------------------------------------------------------------------------------------------------------------------------------------------------------------------------------------------------------------------------------------------------------------------------------------------------------------------------------------------------------------------------------------------------------------|-----------|-----------|--------|-------|-----|------|-------|---------------------------------------------|
| 853.4834                                                                                                                                                                                                                                                                                                                                                                                                                                                                                                                                                                                                                                                                         | 852.4761  | 852.4705  | 6.59   | 497   | -   | 504  | 0 --- | R.LPPSSPQK.L                                |
| 864.4868                                                                                                                                                                                                                                                                                                                                                                                                                                                                                                                                                                                                                                                                         | 863.4795  | 863.3998  | 92.3   | 773   | -   | 779  | 0 --- | R.DVSHNHR.L                                 |
| 953.5057                                                                                                                                                                                                                                                                                                                                                                                                                                                                                                                                                                                                                                                                         | 952.4984  | 952.4548  | 45.8   | 1154  | -   | 1160 | 1 --- | K.QRAEYMR.I                                 |
| 1033.6548                                                                                                                                                                                                                                                                                                                                                                                                                                                                                                                                                                                                                                                                        | 1032.6475 | 1032.5465 | 97.9   | 529   | -   | 537  | 1 --- | R.GSPVRQSFR.K                               |
| 1033.6548                                                                                                                                                                                                                                                                                                                                                                                                                                                                                                                                                                                                                                                                        | 1032.6475 | 1032.5465 | 97.9   | 529   | -   | 537  | 1 --- | R.GSPVRQSFR.K                               |
| 1131.6659                                                                                                                                                                                                                                                                                                                                                                                                                                                                                                                                                                                                                                                                        | 1130.6586 | 1130.6183 | 35.7   | 795   | -   | 804  | 0 --- | K.QLGETLTTELK.A                             |
| 1300.7965                                                                                                                                                                                                                                                                                                                                                                                                                                                                                                                                                                                                                                                                        | 1299.7892 | 1299.6783 | 85.4   | 1136  | -   | 1148 | 1 --- | R.LKTAQQGAGSPDK.G                           |
| 1408.5692                                                                                                                                                                                                                                                                                                                                                                                                                                                                                                                                                                                                                                                                        | 1407.5619 | 1407.6664 | -74.20 | 928   | -   | 940  | 1 --- | R.SMDKAVSVEAAER.D + Oxidation (M)           |
| 1408.5692                                                                                                                                                                                                                                                                                                                                                                                                                                                                                                                                                                                                                                                                        | 1407.5619 | 1407.6664 | -74.19 | 928   | -   | 940  | 1 --- | R.SMDKAVSVEAAER.D + Oxidation (M)           |
| 1427.7416                                                                                                                                                                                                                                                                                                                                                                                                                                                                                                                                                                                                                                                                        | 1426.7343 | 1426.7780 | -30.58 | 257   | -   | 269  | 1 --- | K.SPNTAILIKDEAR.N                           |
| 1457.6237                                                                                                                                                                                                                                                                                                                                                                                                                                                                                                                                                                                                                                                                        | 1456.6164 | 1456.6735 | -39.21 | 482   | -   | 496  | 0 --- | K.AAGGGLPLYGDGYGFR.L                        |
| 1775.7623                                                                                                                                                                                                                                                                                                                                                                                                                                                                                                                                                                                                                                                                        | 1774.7550 | 1774.7904 | -19.94 | 628   | -   | 646  | 0 --- | K.IEGSNGAATPSAPCGSGSR.S                     |
| 1993.8938                                                                                                                                                                                                                                                                                                                                                                                                                                                                                                                                                                                                                                                                        | 1992.8865 | 1993.0051 | -59.48 | 1156  | -   | 1172 | 1 --- | R.AEYMRQAQQQATKPSK.E + Oxidation (M)        |
| 2305.0723                                                                                                                                                                                                                                                                                                                                                                                                                                                                                                                                                                                                                                                                        | 2304.0650 | 2304.2181 | -66.43 | 597   | -   | 617  | 1 --- | R.MEAMEKQIASLTGLVQSALLR.G + Oxidation (M)   |
| 2321.0693                                                                                                                                                                                                                                                                                                                                                                                                                                                                                                                                                                                                                                                                        | 2320.0620 | 2320.2130 | -65.08 | 597   | -   | 617  | 1 --- | R.MEAMEKQIASLTGLVQSALLR.G + 2 Oxidation (M) |
| 2459.1550                                                                                                                                                                                                                                                                                                                                                                                                                                                                                                                                                                                                                                                                        | 2458.1477 | 2458.1169 | 12.5   | 1105  | -   | 1127 | 1 --- | K.DEDDEDRIIALEESGGGSVPPMK.V                 |
| No match to: 811.4696, 842.4688, 848.4903, 850.0149, 850.5021, 856.4824, 865.9890, 868.5110, 870.5007, 876.9973, 882.5262, 882.5263, 892.9677, 951.5844, 996.5507, 1017.6264, 1017.6264, 1045.5144, 1045.5144, 1051.6622, 1051.6622, 1133.6655, 1147.6840, 1151.6809, 1165.6895, 1165.6895, 1179.5537, 1236.6508, 1302.8025, 1307.6320, 1316.8201, 1334.8311, 1334.8311, 1430.5653, 1448.8605, 1448.8605, 1475.6832, 1617.9929, 1617.9929, 1732.0273, 1901.1764, 1940.8547, 2056.9478, 2193.0378, 2211.0134, 2221.0344, 2225.0469, 2230.1272, 2233.0085, 2239.0554, 2248.9812, 2261.0361, 2265.0583, 2283.0833, 2470.2014, 2477.1138, 2477.1138, 2492.1714, 2499.1167, 3337.7234 |           |           |        |       |     |      |       |                                             |

6. [A0A4W2F6E2](#) Mass: 130890 Score: 38 Expect: 20 Matches: 16  
SRC kinase signaling inhibitor 1 OS=Bos indicus x Bos taurus OX=30522 GN=SRCIN1 PE=4 SV=1

| Observed  | Mr(expt)  | Mr(calc)  | ppm  | Start | End | Miss | Ions | Peptide             |
|-----------|-----------|-----------|------|-------|-----|------|------|---------------------|
| 853.4834  | 852.4761  | 852.4705  | 6.59 | 504   | -   | 511  | 0    | --- R.LPPSSPQK.L    |
| 864.4868  | 863.4795  | 863.3998  | 92.3 | 780   | -   | 786  | 0    | --- R.DVSHNHR.L     |
| 953.5057  | 952.4984  | 952.4548  | 45.8 | 1161  | -   | 1167 | 1    | --- K.QRAEYMR.I     |
| 1033.6548 | 1032.6475 | 1032.5465 | 97.9 | 536   | -   | 544  | 1    | --- R.GSPVRQSFR.K   |
| 1033.6548 | 1032.6475 | 1032.5465 | 97.9 | 536   | -   | 544  | 1    | --- R.GSPVRQSFR.K   |
| 1131.6659 | 1130.6586 | 1130.6183 | 35.7 | 802   | -   | 811  | 0    | --- K.QLGETLTTELK.A |

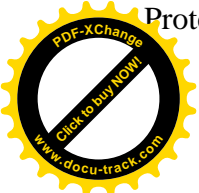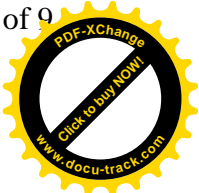

|                                                                                                                                                                                                                                                                                                                                                                                                                                                                                                                                                                                                                                                                                  |           |           |        |      |   |      |   |     |                                             |
|----------------------------------------------------------------------------------------------------------------------------------------------------------------------------------------------------------------------------------------------------------------------------------------------------------------------------------------------------------------------------------------------------------------------------------------------------------------------------------------------------------------------------------------------------------------------------------------------------------------------------------------------------------------------------------|-----------|-----------|--------|------|---|------|---|-----|---------------------------------------------|
| 1300.7965                                                                                                                                                                                                                                                                                                                                                                                                                                                                                                                                                                                                                                                                        | 1299.7892 | 1299.6783 | 85.4   | 1143 | - | 1155 | 1 | --- | R.LKTAQGQAGSPDK.G                           |
| 1408.5692                                                                                                                                                                                                                                                                                                                                                                                                                                                                                                                                                                                                                                                                        | 1407.5619 | 1407.6664 | -74.20 | 935  | - | 947  | 1 | --- | R.SMDKAVSVEAAER.D + Oxidation (M)           |
| 1408.5692                                                                                                                                                                                                                                                                                                                                                                                                                                                                                                                                                                                                                                                                        | 1407.5619 | 1407.6664 | -74.19 | 935  | - | 947  | 1 | --- | R.SMDKAVSVEAAER.D + Oxidation (M)           |
| 1427.7416                                                                                                                                                                                                                                                                                                                                                                                                                                                                                                                                                                                                                                                                        | 1426.7343 | 1426.7780 | -30.58 | 264  | - | 276  | 1 | --- | K.SPNTAILIKDEAR.N                           |
| 1457.6237                                                                                                                                                                                                                                                                                                                                                                                                                                                                                                                                                                                                                                                                        | 1456.6164 | 1456.6735 | -39.21 | 489  | - | 503  | 0 | --- | K.AAGGGPLYGDBGYGF.R.L                       |
| 1775.7623                                                                                                                                                                                                                                                                                                                                                                                                                                                                                                                                                                                                                                                                        | 1774.7550 | 1774.7904 | -19.94 | 635  | - | 653  | 0 | --- | K.IEGSNGAATPSAPCGSGSR.S                     |
| 1993.8938                                                                                                                                                                                                                                                                                                                                                                                                                                                                                                                                                                                                                                                                        | 1992.8865 | 1993.0051 | -59.48 | 1163 | - | 1179 | 1 | --- | R.AEYMRQAQQQATKPSK.E + Oxidation (M)        |
| 2305.0723                                                                                                                                                                                                                                                                                                                                                                                                                                                                                                                                                                                                                                                                        | 2304.0650 | 2304.2181 | -66.43 | 604  | - | 624  | 1 | --- | R.MEAMEKQIASLTGLVQSALLR.G + Oxidation (M)   |
| 2321.0693                                                                                                                                                                                                                                                                                                                                                                                                                                                                                                                                                                                                                                                                        | 2320.0620 | 2320.2130 | -65.08 | 604  | - | 624  | 1 | --- | R.MEAMEKQIASLTGLVQSALLR.G + 2 Oxidation (M) |
| 2459.1550                                                                                                                                                                                                                                                                                                                                                                                                                                                                                                                                                                                                                                                                        | 2458.1477 | 2458.1169 | 12.5   | 1112 | - | 1134 | 1 | --- | K.DEDDEDRIIAELESGGGSGVPPMK.V                |
| No match to: 811.4696, 842.4688, 848.4903, 850.0149, 850.5021, 856.4824, 865.9890, 868.5110, 870.5007, 876.9973, 882.5262, 882.5263, 892.9677, 951.5844, 996.5507, 1017.6264, 1017.6264, 1045.5144, 1045.5144, 1051.6622, 1051.6622, 1133.6655, 1147.6840, 1151.6809, 1165.6895, 1165.6895, 1179.5537, 1236.6508, 1302.8025, 1307.6320, 1316.8201, 1334.8311, 1334.8311, 1430.5653, 1448.8605, 1448.8605, 1475.6832, 1617.9929, 1617.9929, 1732.0273, 1901.1764, 1940.8547, 2056.9478, 2193.0378, 2211.0134, 2221.0344, 2225.0469, 2230.1272, 2233.0085, 2239.0554, 2248.9812, 2261.0361, 2265.0583, 2283.0833, 2470.2014, 2477.1138, 2477.1138, 2492.1714, 2499.1167, 3337.7234 |           |           |        |      |   |      |   |     |                                             |

|                                                                                                                                                                                                                                                                                                                                                                                                                                                                                                                                                                                                                                                                                                                                                                         |                            |             |           |            |                                          |
|-------------------------------------------------------------------------------------------------------------------------------------------------------------------------------------------------------------------------------------------------------------------------------------------------------------------------------------------------------------------------------------------------------------------------------------------------------------------------------------------------------------------------------------------------------------------------------------------------------------------------------------------------------------------------------------------------------------------------------------------------------------------------|----------------------------|-------------|-----------|------------|------------------------------------------|
| 7.                                                                                                                                                                                                                                                                                                                                                                                                                                                                                                                                                                                                                                                                                                                                                                      | <a href="#">A0A4W2FSP5</a> | Mass: 32222 | Score: 38 | Expect: 20 | Matches: 8                               |
| TATA-box binding protein associated factor, RNA polymerase I subunit D OS=Bos indicus x Bos taurus OX=30522 GN=TAF1D PE=4 SV=1                                                                                                                                                                                                                                                                                                                                                                                                                                                                                                                                                                                                                                          |                            |             |           |            |                                          |
| Observed                                                                                                                                                                                                                                                                                                                                                                                                                                                                                                                                                                                                                                                                                                                                                                | Mr(expt)                   | Mr(calc)    | ppm       | Start      | End Miss Ions Peptide                    |
| 856.4824                                                                                                                                                                                                                                                                                                                                                                                                                                                                                                                                                                                                                                                                                                                                                                | 855.4751                   | 855.5039    | -33.61    | 100        | - 107 1 --- R.SVGRPKGR.R                 |
| 868.5110                                                                                                                                                                                                                                                                                                                                                                                                                                                                                                                                                                                                                                                                                                                                                                | 867.5037                   | 867.5331    | -33.81    | 49         | - 55 1 --- R.KFVHIPK.N                   |
| 1045.5144                                                                                                                                                                                                                                                                                                                                                                                                                                                                                                                                                                                                                                                                                                                                                               | 1044.5071                  | 1044.4698   | 35.7      | 267        | - 274 1 --- K.HWIEDKMA.- + Oxidation (M) |
| 1045.5144                                                                                                                                                                                                                                                                                                                                                                                                                                                                                                                                                                                                                                                                                                                                                               | 1044.5071                  | 1044.4698   | 35.7      | 267        | - 274 1 --- K.HWIEDKMA.- + Oxidation (M) |
| 1147.6840                                                                                                                                                                                                                                                                                                                                                                                                                                                                                                                                                                                                                                                                                                                                                               | 1146.6767                  | 1146.6397   | 32.3      | 144        | - 153 0 --- K.ILTFEQAVAR.G               |
| 1901.1764                                                                                                                                                                                                                                                                                                                                                                                                                                                                                                                                                                                                                                                                                                                                                               | 1900.1691                  | 1899.9982   | 90.0      | 225        | - 240 1 --- K.LVENSFYIISSEFPKK.K         |
| 2261.0361                                                                                                                                                                                                                                                                                                                                                                                                                                                                                                                                                                                                                                                                                                                                                               | 2260.0288                  | 2260.1183   | -39.57    | 56         | - 76 0 --- K.NTQATESSSDSIEPRPLTLK.A      |
| 2283.0833                                                                                                                                                                                                                                                                                                                                                                                                                                                                                                                                                                                                                                                                                                                                                               | 2282.0760                  | 2282.2072   | -57.49    | 124        | - 142 1 --- K.RPGFPFLESENGRKPLPWR.K      |
| No match to: 811.4696, 842.4688, 848.4903, 850.0149, 850.5021, 853.4834, 864.4868, 865.9890, 870.5007, 876.9973, 882.5262, 882.5263, 892.9677, 951.5844, 953.5057, 996.5507, 1017.6264, 1017.6264, 1033.6548, 1033.6548, 1051.6622, 1051.6622, 1131.6659, 1133.6655, 1151.6809, 1165.6895, 1165.6895, 1179.5537, 1236.6508, 1300.7965, 1302.8025, 1307.6320, 1316.8201, 1334.8311, 1334.8311, 1408.5692, 1408.5692, 1427.7416, 1430.5653, 1448.8605, 1448.8605, 1457.6237, 1475.6832, 1617.9929, 1617.9929, 1732.0273, 1775.7623, 1940.8547, 1993.8938, 2056.9478, 2193.0378, 2211.0134, 2221.0344, 2225.0469, 2230.1272, 2233.0085, 2239.0554, 2248.9812, 2265.0583, 2305.0723, 2321.0693, 2459.1550, 2470.2014, 2477.1138, 2477.1138, 2492.1714, 2499.1167, 3337.7234 |                            |             |           |            |                                          |

|                                                                                                                                                                                                                                                                                                                                                                                                                                                                                                                                                                                                                                                                                                                                                                         |                        |             |           |            |                                          |
|-------------------------------------------------------------------------------------------------------------------------------------------------------------------------------------------------------------------------------------------------------------------------------------------------------------------------------------------------------------------------------------------------------------------------------------------------------------------------------------------------------------------------------------------------------------------------------------------------------------------------------------------------------------------------------------------------------------------------------------------------------------------------|------------------------|-------------|-----------|------------|------------------------------------------|
| 8.                                                                                                                                                                                                                                                                                                                                                                                                                                                                                                                                                                                                                                                                                                                                                                      | <a href="#">Q32LB6</a> | Mass: 32222 | Score: 38 | Expect: 20 | Matches: 8                               |
| TATA box-binding protein-associated factor RNA polymerase I subunit D OS=Bos taurus OX=9913 GN=TAF1D PE=2 SV=1                                                                                                                                                                                                                                                                                                                                                                                                                                                                                                                                                                                                                                                          |                        |             |           |            |                                          |
| Observed                                                                                                                                                                                                                                                                                                                                                                                                                                                                                                                                                                                                                                                                                                                                                                | Mr(expt)               | Mr(calc)    | ppm       | Start      | End Miss Ions Peptide                    |
| 856.4824                                                                                                                                                                                                                                                                                                                                                                                                                                                                                                                                                                                                                                                                                                                                                                | 855.4751               | 855.5039    | -33.61    | 100        | - 107 1 --- R.SVGRPKGR.R                 |
| 868.5110                                                                                                                                                                                                                                                                                                                                                                                                                                                                                                                                                                                                                                                                                                                                                                | 867.5037               | 867.5331    | -33.81    | 49         | - 55 1 --- R.KFVHIPK.N                   |
| 1045.5144                                                                                                                                                                                                                                                                                                                                                                                                                                                                                                                                                                                                                                                                                                                                                               | 1044.5071              | 1044.4698   | 35.7      | 267        | - 274 1 --- K.HWIEDKMA.- + Oxidation (M) |
| 1045.5144                                                                                                                                                                                                                                                                                                                                                                                                                                                                                                                                                                                                                                                                                                                                                               | 1044.5071              | 1044.4698   | 35.7      | 267        | - 274 1 --- K.HWIEDKMA.- + Oxidation (M) |
| 1147.6840                                                                                                                                                                                                                                                                                                                                                                                                                                                                                                                                                                                                                                                                                                                                                               | 1146.6767              | 1146.6397   | 32.3      | 144        | - 153 0 --- K.ILTFEQAVAR.G               |
| 1901.1764                                                                                                                                                                                                                                                                                                                                                                                                                                                                                                                                                                                                                                                                                                                                                               | 1900.1691              | 1899.9982   | 90.0      | 225        | - 240 1 --- K.LVENSFYIISSEFPKK.K         |
| 2261.0361                                                                                                                                                                                                                                                                                                                                                                                                                                                                                                                                                                                                                                                                                                                                                               | 2260.0288              | 2260.1183   | -39.57    | 56         | - 76 0 --- K.NTQATESSSDSIEPRPLTLK.A      |
| 2283.0833                                                                                                                                                                                                                                                                                                                                                                                                                                                                                                                                                                                                                                                                                                                                                               | 2282.0760              | 2282.2072   | -57.49    | 124        | - 142 1 --- K.RPGFPFLESENGRKPLPWR.K      |
| No match to: 811.4696, 842.4688, 848.4903, 850.0149, 850.5021, 853.4834, 864.4868, 865.9890, 870.5007, 876.9973, 882.5262, 882.5263, 892.9677, 951.5844, 953.5057, 996.5507, 1017.6264, 1017.6264, 1033.6548, 1033.6548, 1051.6622, 1051.6622, 1131.6659, 1133.6655, 1151.6809, 1165.6895, 1165.6895, 1179.5537, 1236.6508, 1300.7965, 1302.8025, 1307.6320, 1316.8201, 1334.8311, 1334.8311, 1408.5692, 1408.5692, 1427.7416, 1430.5653, 1448.8605, 1448.8605, 1457.6237, 1475.6832, 1617.9929, 1617.9929, 1732.0273, 1775.7623, 1940.8547, 1993.8938, 2056.9478, 2193.0378, 2211.0134, 2221.0344, 2225.0469, 2230.1272, 2233.0085, 2239.0554, 2248.9812, 2265.0583, 2305.0723, 2321.0693, 2459.1550, 2470.2014, 2477.1138, 2477.1138, 2492.1714, 2499.1167, 3337.7234 |                        |             |           |            |                                          |

|                                                                                                                                                                                                                                                                                                                                                                                                                                                                                                                                                                                                                                                                                  |                            |              |           |            |                                                         |
|----------------------------------------------------------------------------------------------------------------------------------------------------------------------------------------------------------------------------------------------------------------------------------------------------------------------------------------------------------------------------------------------------------------------------------------------------------------------------------------------------------------------------------------------------------------------------------------------------------------------------------------------------------------------------------|----------------------------|--------------|-----------|------------|---------------------------------------------------------|
| 9.                                                                                                                                                                                                                                                                                                                                                                                                                                                                                                                                                                                                                                                                               | <a href="#">A0A3Q1LZS3</a> | Mass: 135577 | Score: 38 | Expect: 21 | Matches: 16                                             |
| SRC kinase signaling inhibitor 1 OS=Bos taurus OX=9913 GN=SRCIN1 PE=4 SV=1                                                                                                                                                                                                                                                                                                                                                                                                                                                                                                                                                                                                       |                            |              |           |            |                                                         |
| Observed                                                                                                                                                                                                                                                                                                                                                                                                                                                                                                                                                                                                                                                                         | Mr(expt)                   | Mr(calc)     | ppm       | Start      | End Miss Ions Peptide                                   |
| 853.4834                                                                                                                                                                                                                                                                                                                                                                                                                                                                                                                                                                                                                                                                         | 852.4761                   | 852.4705     | 6.59      | 546        | - 553 0 --- R.LPPSSPQK.L                                |
| 864.4868                                                                                                                                                                                                                                                                                                                                                                                                                                                                                                                                                                                                                                                                         | 863.4795                   | 863.3998     | 92.3      | 822        | - 828 0 --- R.DVSHNHR.L                                 |
| 953.5057                                                                                                                                                                                                                                                                                                                                                                                                                                                                                                                                                                                                                                                                         | 952.4984                   | 952.4548     | 45.8      | 1203       | - 1209 1 --- K.QRAEYMR.I                                |
| 1033.6548                                                                                                                                                                                                                                                                                                                                                                                                                                                                                                                                                                                                                                                                        | 1032.6475                  | 1032.5465    | 97.9      | 578        | - 586 1 --- R.GSPVRQSF.R.K                              |
| 1033.6548                                                                                                                                                                                                                                                                                                                                                                                                                                                                                                                                                                                                                                                                        | 1032.6475                  | 1032.5465    | 97.9      | 578        | - 586 1 --- R.GSPVRQSF.R.K                              |
| 1131.6659                                                                                                                                                                                                                                                                                                                                                                                                                                                                                                                                                                                                                                                                        | 1130.6586                  | 1130.6183    | 35.7      | 844        | - 853 0 --- K.QLGETLTELK.A                              |
| 1300.7965                                                                                                                                                                                                                                                                                                                                                                                                                                                                                                                                                                                                                                                                        | 1299.7892                  | 1299.6783    | 85.4      | 1185       | - 1197 1 --- R.LKTAQGQAGSPDK.G                          |
| 1408.5692                                                                                                                                                                                                                                                                                                                                                                                                                                                                                                                                                                                                                                                                        | 1407.5619                  | 1407.6664    | -74.20    | 977        | - 989 1 --- R.SMDKAVSVEAAER.D + Oxidation (M)           |
| 1408.5692                                                                                                                                                                                                                                                                                                                                                                                                                                                                                                                                                                                                                                                                        | 1407.5619                  | 1407.6664    | -74.19    | 977        | - 989 1 --- R.SMDKAVSVEAAER.D + Oxidation (M)           |
| 1427.7416                                                                                                                                                                                                                                                                                                                                                                                                                                                                                                                                                                                                                                                                        | 1426.7343                  | 1426.7780    | -30.58    | 306        | - 318 1 --- K.SPNTAILIKDEAR.N                           |
| 1457.6237                                                                                                                                                                                                                                                                                                                                                                                                                                                                                                                                                                                                                                                                        | 1456.6164                  | 1456.6735    | -39.21    | 531        | - 545 0 --- K.AAGGGPLYGDBGYGF.R.L                       |
| 1775.7623                                                                                                                                                                                                                                                                                                                                                                                                                                                                                                                                                                                                                                                                        | 1774.7550                  | 1774.7904    | -19.94    | 677        | - 695 0 --- K.IEGSNGAATPSAPCGSGSR.S                     |
| 1993.8938                                                                                                                                                                                                                                                                                                                                                                                                                                                                                                                                                                                                                                                                        | 1992.8865                  | 1993.0051    | -59.48    | 1205       | - 1221 1 --- R.AEYMRQAQQQATKPSK.E + Oxidation (M)       |
| 2305.0723                                                                                                                                                                                                                                                                                                                                                                                                                                                                                                                                                                                                                                                                        | 2304.0650                  | 2304.2181    | -66.43    | 646        | - 666 1 --- R.MEAMEKQIASLTGLVQSALLR.G + Oxidation (M)   |
| 2321.0693                                                                                                                                                                                                                                                                                                                                                                                                                                                                                                                                                                                                                                                                        | 2320.0620                  | 2320.2130    | -65.08    | 646        | - 666 1 --- R.MEAMEKQIASLTGLVQSALLR.G + 2 Oxidation (M) |
| 2459.1550                                                                                                                                                                                                                                                                                                                                                                                                                                                                                                                                                                                                                                                                        | 2458.1477                  | 2458.1169    | 12.5      | 1154       | - 1176 1 --- K.DEDDEDRIIAELESGGGSGVPPMK.V               |
| No match to: 811.4696, 842.4688, 848.4903, 850.0149, 850.5021, 856.4824, 865.9890, 868.5110, 870.5007, 876.9973, 882.5262, 882.5263, 892.9677, 951.5844, 996.5507, 1017.6264, 1017.6264, 1045.5144, 1045.5144, 1051.6622, 1051.6622, 1133.6655, 1147.6840, 1151.6809, 1165.6895, 1165.6895, 1179.5537, 1236.6508, 1302.8025, 1307.6320, 1316.8201, 1334.8311, 1334.8311, 1430.5653, 1448.8605, 1448.8605, 1475.6832, 1617.9929, 1617.9929, 1732.0273, 1901.1764, 1940.8547, 2056.9478, 2193.0378, 2211.0134, 2221.0344, 2225.0469, 2230.1272, 2233.0085, 2239.0554, 2248.9812, 2261.0361, 2265.0583, 2283.0833, 2470.2014, 2477.1138, 2477.1138, 2492.1714, 2499.1167, 3337.7234 |                            |              |           |            |                                                         |

|                                                                                           |                            |              |           |            |                                               |
|-------------------------------------------------------------------------------------------|----------------------------|--------------|-----------|------------|-----------------------------------------------|
| 10.                                                                                       | <a href="#">A0A4W2EDE8</a> | Mass: 135577 | Score: 38 | Expect: 21 | Matches: 16                                   |
| SRC kinase signaling inhibitor 1 OS=Bos indicus x Bos taurus OX=30522 GN=SRCIN1 PE=4 SV=1 |                            |              |           |            |                                               |
| Observed                                                                                  | Mr(expt)                   | Mr(calc)     | ppm       | Start      | End Miss Ions Peptide                         |
| 853.4834                                                                                  | 852.4761                   | 852.4705     | 6.59      | 546        | - 553 0 --- R.LPPSSPQK.L                      |
| 864.4868                                                                                  | 863.4795                   | 863.3998     | 92.3      | 822        | - 828 0 --- R.DVSHNHR.L                       |
| 953.5057                                                                                  | 952.4984                   | 952.4548     | 45.8      | 1203       | - 1209 1 --- K.QRAEYMR.I                      |
| 1033.6548                                                                                 | 1032.6475                  | 1032.5465    | 97.9      | 578        | - 586 1 --- R.GSPVRQSF.R.K                    |
| 1033.6548                                                                                 | 1032.6475                  | 1032.5465    | 97.9      | 578        | - 586 1 --- R.GSPVRQSF.R.K                    |
| 1131.6659                                                                                 | 1130.6586                  | 1130.6183    | 35.7      | 844        | - 853 0 --- K.QLGETLTELK.A                    |
| 1300.7965                                                                                 | 1299.7892                  | 1299.6783    | 85.4      | 1185       | - 1197 1 --- R.LKTAQGQAGSPDK.G                |
| 1408.5692                                                                                 | 1407.5619                  | 1407.6664    | -74.20    | 977        | - 989 1 --- R.SMDKAVSVEAAER.D + Oxidation (M) |
| 1408.5692                                                                                 | 1407.5619                  | 1407.6664    | -74.19    | 977        | - 989 1 --- R.SMDKAVSVEAAER.D + Oxidation (M) |
| 1427.7416                                                                                 | 1426.7343                  | 1426.7780    | -30.58    | 306        | - 318 1 --- K.SPNTAILIKDEAR.N                 |
| 1457.6237                                                                                 | 1456.6164                  | 1456.6735    | -39.21    | 531        | - 545 0 --- K.AAGGGPLYGDBGYGF.R.L             |

|                                                                                                                                                                                                                                                                                                                                                                                                                                                                                                                                                                                                                                                                       |           |           |        |      |   |      |   |     |                                             |
|-----------------------------------------------------------------------------------------------------------------------------------------------------------------------------------------------------------------------------------------------------------------------------------------------------------------------------------------------------------------------------------------------------------------------------------------------------------------------------------------------------------------------------------------------------------------------------------------------------------------------------------------------------------------------|-----------|-----------|--------|------|---|------|---|-----|---------------------------------------------|
| 1775.7623                                                                                                                                                                                                                                                                                                                                                                                                                                                                                                                                                                                                                                                             | 1774.7550 | 1774.7904 | -19.94 | 677  | - | 695  | 0 | --- | K.IEGSNGAATPSAPCGSGSR.S                     |
| 1993.8938                                                                                                                                                                                                                                                                                                                                                                                                                                                                                                                                                                                                                                                             | 1992.8865 | 1993.0051 | -59.48 | 1205 | - | 1221 | 1 | --- | R.AEYMRQAQQQATKPSK.E + Oxidation (M)        |
| 2305.0723                                                                                                                                                                                                                                                                                                                                                                                                                                                                                                                                                                                                                                                             | 2304.0650 | 2304.2181 | -66.43 | 646  | - | 666  | 1 | --- | R.MEAMEKQIASLTGLVQSALLR.G + Oxidation (M)   |
| 2321.0693                                                                                                                                                                                                                                                                                                                                                                                                                                                                                                                                                                                                                                                             | 2320.0620 | 2320.2130 | -65.08 | 646  | - | 666  | 1 | --- | R.MEAMEKQIASLTGLVQSALLR.G + 2 Oxidation (M) |
| 2459.1550                                                                                                                                                                                                                                                                                                                                                                                                                                                                                                                                                                                                                                                             | 2458.1477 | 2458.1169 | 12.5   | 1154 | - | 1176 | 1 | --- | K.DEDDEDRIIAELESGGGSVPPMK.V                 |
| No match to: 811.4696, 842.4688, 848.4903, 850.0149, 850.5021, 856.4824, 865.9890, 868.5110, 870.5007, 876.9973, 882.5262, 882.5263, 892.9677, 951.5844, 996.5507, 1017.6264, 1017.6264, 1045.5144, 1051.6622, 1051.6622, 1133.6655, 1147.6840, 1151.6809, 1165.6895, 1165.6895, 1179.5537, 1236.6508, 1302.8025, 1307.6320, 1316.8201, 1334.8311, 1334.8311, 1430.5653, 1448.8605, 1448.8605, 1475.6832, 1617.9929, 1617.9929, 1732.0273, 1901.1764, 1940.8547, 2056.9478, 2193.0378, 2211.0134, 2221.0344, 2225.0469, 2230.1272, 2233.0085, 2239.0554, 2248.9812, 2261.0361, 2265.0583, 2283.0833, 2470.2014, 2477.1138, 2477.1138, 2492.1714, 2499.1167, 3337.7234 |           |           |        |      |   |      |   |     |                                             |

11. [A0A3Q1MIM5](#) Mass: 16207 Score: 37 Expect: 24 Matches: 5

| Uncharacterized protein OS=Bos taurus OX=9913 PE=4 SV=1                                                                                                                                                                                                                                                                                                                                                                                                                                                                                                                                                                                                                                                                                                                                       |           |           |        |       |     |      |      |         |                                          |
|-----------------------------------------------------------------------------------------------------------------------------------------------------------------------------------------------------------------------------------------------------------------------------------------------------------------------------------------------------------------------------------------------------------------------------------------------------------------------------------------------------------------------------------------------------------------------------------------------------------------------------------------------------------------------------------------------------------------------------------------------------------------------------------------------|-----------|-----------|--------|-------|-----|------|------|---------|------------------------------------------|
| Observed                                                                                                                                                                                                                                                                                                                                                                                                                                                                                                                                                                                                                                                                                                                                                                                      | Mr(expt)  | Mr(calc)  | ppm    | Start | End | Miss | Ions | Peptide |                                          |
| 870.5007                                                                                                                                                                                                                                                                                                                                                                                                                                                                                                                                                                                                                                                                                                                                                                                      | 869.4934  | 869.4130  | 92.5   | 40    | -   | 47   | 0    | ---     | K.AEEEEAPPK.E                            |
| 951.5844                                                                                                                                                                                                                                                                                                                                                                                                                                                                                                                                                                                                                                                                                                                                                                                      | 950.5771  | 950.5081  | 72.6   | 134   | -   | 140  | 1    | ---     | K.MVKMLWK.I + Oxidation (M)              |
| 1940.8547                                                                                                                                                                                                                                                                                                                                                                                                                                                                                                                                                                                                                                                                                                                                                                                     | 1939.8474 | 1940.0190 | -88.42 | 55    | -   | 73   | 1    | ---     | K.TPAGHAIPPKTGSMVGIIYK.G + Oxidation (M) |
| 2056.9478                                                                                                                                                                                                                                                                                                                                                                                                                                                                                                                                                                                                                                                                                                                                                                                     | 2055.9405 | 2055.9901 | -24.13 | 114   | -   | 130  | 0    | ---     | K.LFYQSGSEEIESVVHYLR.E                   |
| 3337.7234                                                                                                                                                                                                                                                                                                                                                                                                                                                                                                                                                                                                                                                                                                                                                                                     | 3336.7161 | 3336.6105 | 31.7   | 76    | -   | 104  | 1    | ---     | K.TFTQSPQPGQHDSGSGFIPFKWPAWPK.T          |
| No match to: 811.4696, 842.4688, 848.4903, 850.0149, 850.5021, 853.4834, 856.4824, 864.4868, 865.9890, 868.5110, 876.9973, 882.5262, 882.5263, 892.9677, 953.5057, 996.5507, 1017.6264, 1017.6264, 1033.6548, 1033.6548, 1045.5144, 1045.5144, 1051.6622, 1051.6622, 1131.6659, 1133.6655, 1147.6840, 1151.6809, 1165.6895, 1179.5537, 1236.6508, 1300.7965, 1302.8025, 1307.6320, 1316.8201, 1334.8311, 1334.8311, 1408.5692, 1408.5692, 1427.7416, 1430.5653, 1448.8605, 1448.8605, 1457.6237, 1475.6832, 1617.9929, 1617.9929, 1732.0273, 1775.7623, 1901.1764, 1993.8938, 2193.0378, 2211.0134, 2221.0344, 2225.0469, 2230.1272, 2233.0085, 2239.0554, 2248.9812, 2261.0361, 2265.0583, 2283.0833, 2305.0723, 2321.0693, 2459.1550, 2470.2014, 2477.1138, 2477.1138, 2492.1714, 2499.1167 |           |           |        |       |     |      |      |         |                                          |

12. [A0A452DJF3](#) Mass: 31845 Score: 37 Expect: 24 Matches: 9

| Phosphatidylinositol transfer protein beta isoform OS=Bos taurus OX=9913 GN=PITPNB PE=4 SV=1                                                                                                                                                                                                                                                                                                                                                                                                                                                                                                                                                                                                                                                                  |           |           |        |       |     |      |      |         |                                |
|---------------------------------------------------------------------------------------------------------------------------------------------------------------------------------------------------------------------------------------------------------------------------------------------------------------------------------------------------------------------------------------------------------------------------------------------------------------------------------------------------------------------------------------------------------------------------------------------------------------------------------------------------------------------------------------------------------------------------------------------------------------|-----------|-----------|--------|-------|-----|------|------|---------|--------------------------------|
| Observed                                                                                                                                                                                                                                                                                                                                                                                                                                                                                                                                                                                                                                                                                                                                                      | Mr(expt)  | Mr(calc)  | ppm    | Start | End | Miss | Ions | Peptide |                                |
| 848.4903                                                                                                                                                                                                                                                                                                                                                                                                                                                                                                                                                                                                                                                                                                                                                      | 847.4830  | 847.5531  | -82.70 | 195   | -   | 201  | 1    | ---     | K.LVTIKFK.W                    |
| 868.5110                                                                                                                                                                                                                                                                                                                                                                                                                                                                                                                                                                                                                                                                                                                                                      | 867.5037  | 867.4603  | 50.1   | 171   | -   | 178  | 0    | ---     | R.GPLGNWKK.K                   |
| 996.5507                                                                                                                                                                                                                                                                                                                                                                                                                                                                                                                                                                                                                                                                                                                                                      | 995.5434  | 995.5552  | -11.87 | 171   | -   | 179  | 1    | ---     | R.GPLGNWKK.K.E                 |
| 1051.6622                                                                                                                                                                                                                                                                                                                                                                                                                                                                                                                                                                                                                                                                                                                                                     | 1050.6549 | 1050.5896 | 62.2   | 1     | -   | 8    | 1    | ---     | -MVLKEFR.V + Oxidation (M)     |
| 1051.6622                                                                                                                                                                                                                                                                                                                                                                                                                                                                                                                                                                                                                                                                                                                                                     | 1050.6550 | 1050.5896 | 62.2   | 1     | -   | 8    | 1    | ---     | -MVLKEFR.V + Oxidation (M)     |
| 1179.5537                                                                                                                                                                                                                                                                                                                                                                                                                                                                                                                                                                                                                                                                                                                                                     | 1178.5464 | 1178.6237 | -65.53 | 200   | -   | 208  | 1    | ---     | K.PKWWGLQSK.V                  |
| 1307.6320                                                                                                                                                                                                                                                                                                                                                                                                                                                                                                                                                                                                                                                                                                                                                     | 1306.6247 | 1306.6227 | 1.53   | 235   | -   | 244  | 0    | ---     | K.WIDLTMEDIR.R + Oxidation (M) |
| 1457.6237                                                                                                                                                                                                                                                                                                                                                                                                                                                                                                                                                                                                                                                                                                                                                     | 1456.6164 | 1456.7384 | -83.75 | 74    | -   | 86   | 0    | ---     | R.MIAPEGSLVFHEK.A              |
| 2321.0693                                                                                                                                                                                                                                                                                                                                                                                                                                                                                                                                                                                                                                                                                                                                                     | 2320.0620 | 2320.0768 | -6.39  | 87    | -   | 104  | 1    | ---     | K.AWNAYPYCRTILQNEYMK.D         |
| No match to: 811.4696, 842.4688, 850.0149, 850.5021, 853.4834, 856.4824, 864.4868, 865.9890, 870.5007, 876.9973, 882.5262, 882.5263, 892.9677, 951.5844, 953.5057, 1017.6264, 1017.6264, 1033.6548, 1033.6548, 1045.5144, 1045.5144, 1131.6659, 1133.6655, 1147.6840, 1151.6809, 1165.6895, 1165.6895, 1236.6508, 1300.7965, 1302.8025, 1316.8201, 1334.8311, 1334.8311, 1408.5692, 1408.5692, 1427.7416, 1430.5653, 1448.8605, 1448.8605, 1475.6832, 1617.9929, 1617.9929, 1732.0273, 1775.7623, 1901.1764, 1940.8547, 1993.8938, 2056.9478, 2193.0378, 2211.0134, 2221.0344, 2225.0469, 2230.1272, 2233.0085, 2239.0554, 2248.9812, 2261.0361, 2265.0583, 2283.0833, 2305.0723, 2459.1550, 2470.2014, 2477.1138, 2477.1138, 2492.1714, 2499.1167, 3337.7234 |           |           |        |       |     |      |      |         |                                |

13. [A0A3Q1N5E1](#) Mass: 133286 Score: 37 Expect: 27 Matches: 16

| SRC kinase signaling inhibitor 1 OS=Bos taurus OX=9913 GN=SRCIN1 PE=4 SV=1                                                                                                                                                                                                                                                                                                                                                                                                                                                                                                                                                                                            |           |           |        |       |     |      |      |         |                                             |
|-----------------------------------------------------------------------------------------------------------------------------------------------------------------------------------------------------------------------------------------------------------------------------------------------------------------------------------------------------------------------------------------------------------------------------------------------------------------------------------------------------------------------------------------------------------------------------------------------------------------------------------------------------------------------|-----------|-----------|--------|-------|-----|------|------|---------|---------------------------------------------|
| Observed                                                                                                                                                                                                                                                                                                                                                                                                                                                                                                                                                                                                                                                              | Mr(expt)  | Mr(calc)  | ppm    | Start | End | Miss | Ions | Peptide |                                             |
| 853.4834                                                                                                                                                                                                                                                                                                                                                                                                                                                                                                                                                                                                                                                              | 852.4761  | 852.4705  | 6.59   | 521   | -   | 528  | 0    | ---     | R.LPPSSPQK.L                                |
| 864.4868                                                                                                                                                                                                                                                                                                                                                                                                                                                                                                                                                                                                                                                              | 863.4795  | 863.3998  | 92.3   | 797   | -   | 803  | 0    | ---     | R.DVSHNHR.L                                 |
| 953.5057                                                                                                                                                                                                                                                                                                                                                                                                                                                                                                                                                                                                                                                              | 952.4984  | 952.4548  | 45.8   | 1178  | -   | 1184 | 1    | ---     | K.QRAEYMR.I                                 |
| 1033.6548                                                                                                                                                                                                                                                                                                                                                                                                                                                                                                                                                                                                                                                             | 1032.6475 | 1032.5465 | 97.9   | 553   | -   | 561  | 1    | ---     | R.GSPVRQSF.R                                |
| 1033.6548                                                                                                                                                                                                                                                                                                                                                                                                                                                                                                                                                                                                                                                             | 1032.6475 | 1032.5465 | 97.9   | 553   | -   | 561  | 1    | ---     | R.GSPVRQSF.R                                |
| 1131.6659                                                                                                                                                                                                                                                                                                                                                                                                                                                                                                                                                                                                                                                             | 1130.6586 | 1130.6183 | 35.7   | 819   | -   | 828  | 0    | ---     | K.QLGETLTCLK.A                              |
| 1300.7965                                                                                                                                                                                                                                                                                                                                                                                                                                                                                                                                                                                                                                                             | 1299.7892 | 1299.6783 | 85.4   | 1160  | -   | 1172 | 1    | ---     | R.LKTAQQGAGSPDK.G                           |
| 1408.5692                                                                                                                                                                                                                                                                                                                                                                                                                                                                                                                                                                                                                                                             | 1407.5619 | 1407.6664 | -74.20 | 952   | -   | 964  | 1    | ---     | R.SMDKAVSVEAAER.D + Oxidation (M)           |
| 1408.5692                                                                                                                                                                                                                                                                                                                                                                                                                                                                                                                                                                                                                                                             | 1407.5619 | 1407.6664 | -74.19 | 952   | -   | 964  | 1    | ---     | R.SMDKAVSVEAAER.D + Oxidation (M)           |
| 1427.7416                                                                                                                                                                                                                                                                                                                                                                                                                                                                                                                                                                                                                                                             | 1426.7343 | 1426.7780 | -30.58 | 281   | -   | 293  | 1    | ---     | K.SPNTAILIKDEAR.N                           |
| 1457.6237                                                                                                                                                                                                                                                                                                                                                                                                                                                                                                                                                                                                                                                             | 1456.6164 | 1456.6735 | -39.21 | 506   | -   | 520  | 0    | ---     | K.AAGGGPLYGDBGYFR.L                         |
| 1775.7623                                                                                                                                                                                                                                                                                                                                                                                                                                                                                                                                                                                                                                                             | 1774.7550 | 1774.7904 | -19.94 | 652   | -   | 670  | 0    | ---     | K.IEGSNGAATPSAPCGSGSR.S                     |
| 1993.8938                                                                                                                                                                                                                                                                                                                                                                                                                                                                                                                                                                                                                                                             | 1992.8865 | 1993.0051 | -59.48 | 1180  | -   | 1196 | 1    | ---     | R.AEYMRQAQQQATKPSK.E + Oxidation (M)        |
| 2305.0723                                                                                                                                                                                                                                                                                                                                                                                                                                                                                                                                                                                                                                                             | 2304.0650 | 2304.2181 | -66.43 | 621   | -   | 641  | 1    | ---     | R.MEAMEKQIASLTGLVQSALLR.G + Oxidation (M)   |
| 2321.0693                                                                                                                                                                                                                                                                                                                                                                                                                                                                                                                                                                                                                                                             | 2320.0620 | 2320.2130 | -65.08 | 621   | -   | 641  | 1    | ---     | R.MEAMEKQIASLTGLVQSALLR.G + 2 Oxidation (M) |
| 2459.1550                                                                                                                                                                                                                                                                                                                                                                                                                                                                                                                                                                                                                                                             | 2458.1477 | 2458.1169 | 12.5   | 1129  | -   | 1151 | 1    | ---     | K.DEDDEDRIIAELESGGGSVPPMK.V                 |
| No match to: 811.4696, 842.4688, 848.4903, 850.0149, 850.5021, 856.4824, 865.9890, 868.5110, 870.5007, 876.9973, 882.5262, 882.5263, 892.9677, 951.5844, 996.5507, 1017.6264, 1017.6264, 1045.5144, 1051.6622, 1051.6622, 1133.6655, 1147.6840, 1151.6809, 1165.6895, 1165.6895, 1179.5537, 1236.6508, 1302.8025, 1307.6320, 1316.8201, 1334.8311, 1334.8311, 1430.5653, 1448.8605, 1448.8605, 1475.6832, 1617.9929, 1617.9929, 1732.0273, 1901.1764, 1940.8547, 2056.9478, 2193.0378, 2211.0134, 2221.0344, 2225.0469, 2230.1272, 2233.0085, 2239.0554, 2248.9812, 2261.0361, 2265.0583, 2283.0833, 2470.2014, 2477.1138, 2477.1138, 2492.1714, 2499.1167, 3337.7234 |           |           |        |       |     |      |      |         |                                             |

14. [A0A4W2E9X7](#) Mass: 28070 Score: 37 Expect: 28 Matches: 8

| Family with sequence similarity 166 member B OS=Bos indicus x Bos taurus OX=30522 GN=FAM166B PE=4 SV=1                                                                                                                                                                                                                                                                                                                                                                                                                                                                                                                                                                                                                                                                            |           |           |        |       |     |      |      |         |                                           |
|-----------------------------------------------------------------------------------------------------------------------------------------------------------------------------------------------------------------------------------------------------------------------------------------------------------------------------------------------------------------------------------------------------------------------------------------------------------------------------------------------------------------------------------------------------------------------------------------------------------------------------------------------------------------------------------------------------------------------------------------------------------------------------------|-----------|-----------|--------|-------|-----|------|------|---------|-------------------------------------------|
| Observed                                                                                                                                                                                                                                                                                                                                                                                                                                                                                                                                                                                                                                                                                                                                                                          | Mr(expt)  | Mr(calc)  | ppm    | Start | End | Miss | Ions | Peptide |                                           |
| 1131.6659                                                                                                                                                                                                                                                                                                                                                                                                                                                                                                                                                                                                                                                                                                                                                                         | 1130.6586 | 1130.6812 | -19.94 | 59    | -   | 68   | 0    | ---     | R.TLLPPIQPPR.S                            |
| 1133.6655                                                                                                                                                                                                                                                                                                                                                                                                                                                                                                                                                                                                                                                                                                                                                                         | 1132.6582 | 1132.6353 | 20.3   | 208   | -   | 217  | 1    | ---     | K.DPKHLPALSR.T                            |
| 1147.6840                                                                                                                                                                                                                                                                                                                                                                                                                                                                                                                                                                                                                                                                                                                                                                         | 1146.6767 | 1146.6258 | 44.4   | 76    | -   | 85   | 0    | ---     | R.SLPVRPGRH.R                             |
| 1408.5692                                                                                                                                                                                                                                                                                                                                                                                                                                                                                                                                                                                                                                                                                                                                                                         | 1407.5619 | 1407.6646 | -72.92 | 165   | -   | 176  | 0    | ---     | K.FFMSGFTGYVPR.A                          |
| 1408.5692                                                                                                                                                                                                                                                                                                                                                                                                                                                                                                                                                                                                                                                                                                                                                                         | 1407.5619 | 1407.6646 | -72.91 | 165   | -   | 176  | 0    | ---     | K.FFMSGFTGYVPR.A                          |
| 2233.0085                                                                                                                                                                                                                                                                                                                                                                                                                                                                                                                                                                                                                                                                                                                                                                         | 2232.0012 | 2231.9753 | 11.6   | 145   | -   | 163  | 1    | ---     | K.DQEPKPEASPSYMDDRDRP.K                   |
| 2248.9812                                                                                                                                                                                                                                                                                                                                                                                                                                                                                                                                                                                                                                                                                                                                                                         | 2247.9739 | 2247.9702 | 1.65   | 145   | -   | 163  | 1    | ---     | K.DQEPKPEASPSYMDDRDRP.K + Oxidation (M)   |
| 2492.1714                                                                                                                                                                                                                                                                                                                                                                                                                                                                                                                                                                                                                                                                                                                                                                         | 2491.1641 | 2491.2094 | -18.15 | 179   | -   | 200  | 0    | ---     | R.FLFGSSFPVLNSQALQEFGEK.M + Oxidation (M) |
| No match to: 811.4696, 842.4688, 848.4903, 850.0149, 850.5021, 853.4834, 856.4824, 864.4868, 865.9890, 868.5110, 870.5007, 876.9973, 882.5262, 882.5263, 892.9677, 951.5844, 996.5507, 1017.6264, 1017.6264, 1045.5144, 1051.6622, 1051.6622, 1133.6655, 1045.5144, 1051.6622, 1051.6622, 1151.6809, 1165.6895, 1165.6895, 1179.5537, 1236.6508, 1300.7965, 1302.8025, 1307.6320, 1316.8201, 1334.8311, 1334.8311, 1427.7416, 1430.5653, 1448.8605, 1448.8605, 1457.6237, 1475.6832, 1617.9929, 1617.9929, 1732.0273, 1775.7623, 1901.1764, 1940.8547, 1993.8938, 2056.9478, 2193.0378, 2211.0134, 2221.0344, 2225.0469, 2230.1272, 2233.0085, 2239.0554, 2261.0361, 2265.0583, 2283.0833, 2305.0723, 2321.0693, 2459.1550, 2470.2014, 2477.1138, 2477.1138, 2499.1167, 3337.7234 |           |           |        |       |     |      |      |         |                                           |

15. [A0A4W2FA54](#) Mass: 140160 Score: 36 Expect: 30 Matches: 16

| Calmodulin regulated spectrin associated protein 1 OS=Bos indicus x Bos taurus OX=30522 GN=CAMSAP1 PE=3 SV=1 |          |          |     |       |     |      |      |         |  |
|--------------------------------------------------------------------------------------------------------------|----------|----------|-----|-------|-----|------|------|---------|--|
| Observed                                                                                                     | Mr(expt) | Mr(calc) | ppm | Start | End | Miss | Ions | Peptide |  |

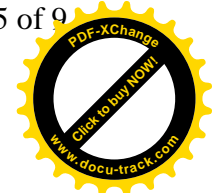

|           |           |           |        |      |   |      |   |     |                                          |
|-----------|-----------|-----------|--------|------|---|------|---|-----|------------------------------------------|
| 842.4688  | 841.4615  | 841.5134  | -61.61 | 598  | - | 604  | 1 | --- | R.QRLQLGK.A                              |
| 864.4868  | 863.4795  | 863.4613  | 21.1   | 1018 | - | 1023 | 1 | --- | K.QEYLRR.K                               |
| 870.5007  | 869.4934  | 869.4243  | 79.5   | 471  | - | 477  | 1 | --- | K.VKEHDDK.D                              |
| 951.5844  | 950.5771  | 950.4821  | 100.0  | 2    | - | 9    | 0 | --- | M.ADSLYNIR.L                             |
| 1045.5144 | 1044.5071 | 1044.5451 | -36.38 | 64   | - | 72   | 1 | --- | R.DVQELKDAK.S                            |
| 1045.5144 | 1044.5071 | 1044.5451 | -36.38 | 64   | - | 72   | 1 | --- | R.DVQELKDAK.S                            |
| 1151.6809 | 1150.6736 | 1150.5843 | 77.6   | 318  | - | 328  | 1 | --- | R.SGDGHQPLGR.K                           |
| 1165.6895 | 1164.6822 | 1164.5775 | 89.9   | 895  | - | 904  | 0 | --- | K.ENVPLEPPR.S                            |
| 1165.6895 | 1164.6822 | 1164.5775 | 89.9   | 895  | - | 904  | 0 | --- | K.ENVPLEPPR.S                            |
| 1179.5537 | 1178.5464 | 1178.5905 | -37.37 | 317  | - | 327  | 1 | --- | R.RSGDGHQPLGR.K                          |
| 1302.8025 | 1301.7952 | 1301.7078 | 67.1   | 907  | - | 918  | 0 | --- | K.ASLIEVDLSLK.A                          |
| 2193.0378 | 2192.0305 | 2192.1048 | -33.90 | 1248 | - | 1266 | 0 | --- | K.TMSVSVDAITIHNLWQPK.R + Oxidation (M)   |
| 2305.0723 | 2304.0650 | 2304.2188 | -66.72 | 277  | - | 296  | 1 | --- | K.TDSFFLEPLMPAVLRPAKEK.Q + Oxidation (M) |
| 2459.1550 | 2458.1477 | 2458.1711 | -9.50  | 907  | - | 929  | 1 | --- | K.ASLIEVDLSLKAPDEDETEGR.D                |
| 2477.1138 | 2476.1065 | 2476.2420 | -54.72 | 1174 | - | 1193 | 1 | --- | K.NSILEELEKCDANHYIILFR.D                 |
| 2477.1138 | 2476.1065 | 2476.2420 | -54.71 | 1174 | - | 1193 | 1 | --- | K.NSILEELEKCDANHYIILFR.D                 |

**No match to:** 811.4696, 848.4903, 850.0149, 850.5021, 853.4834, 856.4824, 865.9890, 868.5110, 876.9973, 882.5262, 882.5263, 892.9677, 953.5057, 996.5507, 1017.6264, 1017.6264, 1033.6548, 1033.6548, 1051.6622, 1051.6622, 1131.6659, 1133.6655, 1147.6840, 1236.6508, 1300.7965, 1307.6320, 1316.8201, 1334.8311, 1334.8311, 1408.5692, 1408.5692, 1427.7416, 1430.5653, 1448.8605, 1448.8605, 1457.6237, 1475.6832, 1617.9929, 1617.9929, 1732.0273, 1775.7623, 1901.1764, 1940.8547, 1993.8938, 2056.9478, 2211.0134, 2221.0344, 2225.0469, 2230.1272, 2233.0085, 2239.0554, 2248.9812, 2261.0361, 2265.0583, 2283.0833, 2321.0693, 2470.2014, 2492.1714, 2499.1167, 3337.7234

16. [A0A4W2GH39](#) Mass: 119304 Score: 36 Expect: 34 Matches: 18

MCF.2 cell line derived transforming sequence-like 2 OS=Bos indicus x Bos taurus OX=30522 GN=MCF2L2 PE=4 SV=1

| Observed  | Mr(expt)  | Mr(calc)  | ppm    | Start | End | Miss | Ions | Peptide |                                     |
|-----------|-----------|-----------|--------|-------|-----|------|------|---------|-------------------------------------|
| 811.4696  | 810.4623  | 810.4309  | 38.7   | 759   | -   | 764  | 0    | ---     | K.YQMLLK.G + Oxidation (M)          |
| 853.4834  | 852.4761  | 852.4568  | 22.7   | 1     | -   | 6    | 0    | ---     | -MLFWLK.E + Oxidation (M)           |
| 882.5262  | 881.5189  | 881.4970  | 24.8   | 419   | -   | 425  | 1    | ---     | K.KHDILEK.S                         |
| 882.5263  | 881.5190  | 881.4970  | 24.9   | 419   | -   | 425  | 1    | ---     | K.KHDILEK.S                         |
| 1045.5144 | 1044.5071 | 1044.5134 | -6.05  | 748   | -   | 755  | 1    | ---     | K.CLREPSQR.L                        |
| 1045.5144 | 1044.5071 | 1044.5134 | -6.05  | 748   | -   | 755  | 1    | ---     | K.CLREPSQR.L                        |
| 1133.6655 | 1132.6582 | 1132.6353 | 20.3   | 48    | -   | 58   | 1    | ---     | R.QFALLSGGRGK.D                     |
| 1165.6895 | 1164.6822 | 1164.6940 | -10.17 | 756   | -   | 764  | 1    | ---     | R.LIKYQMLLK.G + Oxidation (M)       |
| 1165.6895 | 1164.6822 | 1164.6940 | -10.12 | 756   | -   | 764  | 1    | ---     | R.LIKYQMLLK.G + Oxidation (M)       |
| 1179.5537 | 1178.5464 | 1178.5303 | 13.7   | 580   | -   | 589  | 1    | ---     | K.EDDETKSEVK.N                      |
| 1307.6320 | 1306.6247 | 1306.7245 | -76.33 | 1007  | -   | 1017 | 1    | ---     | K.KETSVIYKPSR.I                     |
| 1334.8311 | 1333.8238 | 1333.7354 | 66.3   | 552   | -   | 563  | 0    | ---     | K.ISQPSTLVPHQK.T                    |
| 1334.8311 | 1333.8238 | 1333.7354 | 66.3   | 552   | -   | 563  | 0    | ---     | K.ISQPSTLVPHQK.T                    |
| 1940.8547 | 1939.8474 | 1939.9502 | -52.98 | 2     | -   | 16   | 1    | ---     | M.LFWLKEEMAPQEFTR.R + Oxidation (M) |
| 2056.9478 | 2055.9405 | 2056.0166 | -37.02 | 664   | -   | 679  | 1    | ---     | K.EFLFGNIRELYEFHSR.T                |
| 2221.0344 | 2220.0271 | 2219.9187 | 48.8   | 721   | -   | 737  | 0    | ---     | R.AIWQECQDCTYFGVCQR.Q               |
| 2248.9812 | 2247.9739 | 2248.1865 | -94.54 | 193   | -   | 211  | 1    | ---     | R.HSQWINHRTAIENFALALK.T             |
| 2321.0693 | 2320.0620 | 2320.2541 | -82.77 | 634   | -   | 652  | 1    | ---     | K.EKNIIDGYIIPMDFIWLK.H              |

**No match to:** 842.4688, 848.4903, 850.0149, 850.5021, 856.4824, 864.4868, 865.9890, 868.5110, 870.5007, 876.9973, 892.9677, 951.5844, 953.5057, 996.5507, 1017.6264, 1017.6264, 1033.6548, 1033.6548, 1051.6622, 1051.6622, 1131.6659, 1147.6840, 1151.6809, 1236.6508, 1300.7965, 1302.8025, 1316.8201, 1408.5692, 1408.5692, 1427.7416, 1430.5653, 1448.8605, 1448.8605, 1457.6237, 1475.6832, 1617.9929, 1617.9929, 1732.0273, 1775.7623, 1901.1764, 1993.8938, 2193.0378, 2211.0134, 2225.0469, 2230.1272, 2233.0085, 2239.0554, 2261.0361, 2265.0583, 2283.0833, 2305.0723, 2459.1550, 2470.2014, 2477.1138, 2477.1138, 2492.1714, 2499.1167, 3337.7234

17. [A0A4W2F647](#) Mass: 127627 Score: 36 Expect: 36 Matches: 16

SRC kinase signaling inhibitor 1 OS=Bos indicus x Bos taurus OX=30522 GN=SRCIN1 PE=4 SV=1

| Observed  | Mr(expt)  | Mr(calc)  | ppm    | Start | End | Miss | Ions | Peptide |                                             |
|-----------|-----------|-----------|--------|-------|-----|------|------|---------|---------------------------------------------|
| 848.4903  | 847.4830  | 847.4586  | 28.9   | 10    | -   | 16   | 0    | ---     | R.LLSTVCR.K                                 |
| 853.4834  | 852.4761  | 852.4705  | 6.59   | 501   | -   | 508  | 0    | ---     | R.LPPSSPQK.L                                |
| 864.4868  | 863.4795  | 863.3998  | 92.3   | 777   | -   | 783  | 0    | ---     | R.DVSHNHR.L                                 |
| 953.5057  | 952.4984  | 952.4548  | 45.8   | 1158  | -   | 1164 | 1    | ---     | K.QRAEYMR.I                                 |
| 1033.6548 | 1032.6475 | 1032.5465 | 97.9   | 533   | -   | 541  | 1    | ---     | R.GSPVRQSF.R                                |
| 1033.6548 | 1032.6475 | 1032.5465 | 97.9   | 533   | -   | 541  | 1    | ---     | R.GSPVRQSF.R                                |
| 1131.6659 | 1130.6586 | 1130.6183 | 35.7   | 799   | -   | 808  | 0    | ---     | K.QLGETLTCLK.A                              |
| 1300.7965 | 1299.7892 | 1299.6783 | 85.4   | 1140  | -   | 1152 | 1    | ---     | R.LKTAQGQAGSPDK.G                           |
| 1408.5692 | 1407.5619 | 1407.6664 | -74.20 | 932   | -   | 944  | 1    | ---     | R.SMDKAVSVEAAER.D + Oxidation (M)           |
| 1408.5692 | 1407.5619 | 1407.6664 | -74.19 | 932   | -   | 944  | 1    | ---     | R.SMDKAVSVEAAER.D + Oxidation (M)           |
| 1427.7416 | 1426.7343 | 1426.7780 | -30.58 | 261   | -   | 273  | 1    | ---     | K.SPNTAILIKDEAR.N                           |
| 1457.6237 | 1456.6164 | 1456.6735 | -39.21 | 486   | -   | 500  | 0    | ---     | K.AAGGGPLYGDYGF.R                           |
| 1775.7623 | 1774.7550 | 1774.7904 | -19.94 | 632   | -   | 650  | 0    | ---     | K.IEGSNGAATPSAPCGSGSR.S                     |
| 2305.0723 | 2304.0650 | 2304.2181 | -66.43 | 601   | -   | 621  | 1    | ---     | R.MEAMEKQIASLTGLVQSALLR.G + Oxidation (M)   |
| 2321.0693 | 2320.0620 | 2320.2130 | -65.08 | 601   | -   | 621  | 1    | ---     | R.MEAMEKQIASLTGLVQSALLR.G + 2 Oxidation (M) |
| 2459.1550 | 2458.1477 | 2458.1169 | 12.5   | 1109  | -   | 1131 | 1    | ---     | K.DEDDEDRIAELES GGSGVPPMK.V                 |

**No match to:** 811.4696, 842.4688, 850.0149, 850.5021, 856.4824, 865.9890, 868.5110, 870.5007, 876.9973, 882.5262, 882.5263, 892.9677, 951.5844, 996.5507, 1017.6264, 1017.6264, 1045.5144, 1045.5144, 1051.6622, 1051.6622, 1133.6655, 1147.6840, 1151.6809, 1165.6895, 1165.6895, 1179.5537, 1236.6508, 1302.8025, 1307.6320, 1316.8201, 1334.8311, 1334.8311, 1430.5653, 1448.8605, 1448.8605, 1475.6832, 1617.9929, 1617.9929, 1732.0273, 1901.1764, 1940.8547, 1993.8938, 2056.9478, 2193.0378, 2211.0134, 2221.0344, 2225.0469, 2230.1272, 2233.0085, 2239.0554, 2248.9812, 2261.0361, 2265.0583, 2283.0833, 2470.2014, 2477.1138, 2477.1138, 2492.1714, 2499.1167, 3337.7234

18. [A0A4W2D295](#) Mass: 132512 Score: 35 Expect: 39 Matches: 16

SRC kinase signaling inhibitor 1 OS=Bos indicus x Bos taurus OX=30522 GN=SRCIN1 PE=4 SV=1

| Observed  | Mr(expt)  | Mr(calc)  | ppm    | Start | End | Miss | Ions | Peptide |                                           |
|-----------|-----------|-----------|--------|-------|-----|------|------|---------|-------------------------------------------|
| 853.4834  | 852.4761  | 852.4705  | 6.59   | 520   | -   | 527  | 0    | ---     | R.LPPSSPQK.L                              |
| 864.4868  | 863.4795  | 863.3998  | 92.3   | 796   | -   | 802  | 0    | ---     | R.DVSHNHR.L                               |
| 953.5057  | 952.4984  | 952.4548  | 45.8   | 1177  | -   | 1183 | 1    | ---     | K.QRAEYMR.I                               |
| 1033.6548 | 1032.6475 | 1032.5465 | 97.9   | 552   | -   | 560  | 1    | ---     | R.GSPVRQSF.R                              |
| 1033.6548 | 1032.6475 | 1032.5465 | 97.9   | 552   | -   | 560  | 1    | ---     | R.GSPVRQSF.R                              |
| 1131.6659 | 1130.6586 | 1130.6183 | 35.7   | 818   | -   | 827  | 0    | ---     | K.QLGETLTCLK.A                            |
| 1300.7965 | 1299.7892 | 1299.6783 | 85.4   | 1159  | -   | 1171 | 1    | ---     | R.LKTAQGQAGSPDK.G                         |
| 1408.5692 | 1407.5619 | 1407.6664 | -74.20 | 951   | -   | 963  | 1    | ---     | R.SMDKAVSVEAAER.D + Oxidation (M)         |
| 1408.5692 | 1407.5619 | 1407.6664 | -74.19 | 951   | -   | 963  | 1    | ---     | R.SMDKAVSVEAAER.D + Oxidation (M)         |
| 1427.7416 | 1426.7343 | 1426.7780 | -30.58 | 280   | -   | 292  | 1    | ---     | K.SPNTAILIKDEAR.N                         |
| 1457.6237 | 1456.6164 | 1456.6735 | -39.21 | 505   | -   | 519  | 0    | ---     | K.AAGGGPLYGDYGF.R                         |
| 1775.7623 | 1774.7550 | 1774.7904 | -19.94 | 651   | -   | 669  | 0    | ---     | K.IEGSNGAATPSAPCGSGSR.S                   |
| 1993.8938 | 1992.8865 | 1993.0051 | -59.48 | 1179  | -   | 1195 | 1    | ---     | R.AEYMRIQAQQATKPSK.E + Oxidation (M)      |
| 2305.0723 | 2304.0650 | 2304.2181 | -66.43 | 620   | -   | 640  | 1    | ---     | R.MEAMEKQIASLTGLVQSALLR.G + Oxidation (M) |





2321.0693 2320.0620 2320.2130 -65.08 620 - 640 1 --- R.MEAMEKQIASLTGLVQSALLR.G + 2 Oxidation (M)  
2459.1550 2458.1477 2458.1169 12.5 1128 - 1150 1 --- K.DEDDEDRIIAELESGGGSVPPMK.V  
**No match to:** 811.4696, 842.4688, 848.4903, 850.0149, 850.5021, 856.4824, 865.9890, 868.5110, 870.5007, 876.9973, 882.5262, 882.5263, 892.9677, 951.5844, 996.5507, 1017.6264, 1017.6264, 1045.5144, 1045.5144, 1051.6622, 1051.6622, 1133.6655, 1147.6840, 1151.6809, 1165.6895, 1165.6895, 1179.5537, 1236.6508, 1302.8025, 1307.6320, 1316.8201, 1334.8311, 1334.8311, 1430.5653, 1448.8605, 1448.8605, 1475.6832, 1475.6832, 1617.9929, 1617.9929, 1732.0273, 1901.1764, 1940.8547, 2056.9478, 2193.0378, 2211.0134, 2221.0344, 2225.0469, 2230.1272, 2233.0085, 2239.0554, 2248.9812, 2261.0361, 2265.0583, 2283.0833, 2470.2014, 2477.1138, 2477.1138, 2492.1714, 2499.1167, 3337.7234

19. [A0A4W2CC31](#) Mass: 172499 Score: 35 Expect: 40 Matches: 17  
Calmodulin regulated spectrin associated protein 1 OS=Bos indicus x Bos taurus OX=30522 GN=CAMSAP1 PE=3 SV=1

| Observed                                                                                                                                                                                                                                                                                                                                                                                                                                                                                                                                                                                                                                                                     | Mr(expt)  | Mr(calc)  | ppm    | Start | End | Miss | Ions  | Peptide                                 |
|------------------------------------------------------------------------------------------------------------------------------------------------------------------------------------------------------------------------------------------------------------------------------------------------------------------------------------------------------------------------------------------------------------------------------------------------------------------------------------------------------------------------------------------------------------------------------------------------------------------------------------------------------------------------------|-----------|-----------|--------|-------|-----|------|-------|-----------------------------------------|
| 842.4688                                                                                                                                                                                                                                                                                                                                                                                                                                                                                                                                                                                                                                                                     | 841.4615  | 841.5134  | -61.61 | 882   | -   | 888  | 1 --- | R.QRLQLGK.A                             |
| 864.4868                                                                                                                                                                                                                                                                                                                                                                                                                                                                                                                                                                                                                                                                     | 863.4795  | 863.4613  | 21.1   | 1302  | -   | 1307 | 1 --- | K.QEYLRR.K                              |
| 870.5007                                                                                                                                                                                                                                                                                                                                                                                                                                                                                                                                                                                                                                                                     | 869.4934  | 869.4243  | 79.5   | 755   | -   | 761  | 1 --- | K.VKEHDDK.D                             |
| 1045.5144                                                                                                                                                                                                                                                                                                                                                                                                                                                                                                                                                                                                                                                                    | 1044.5071 | 1044.5451 | -36.38 | 342   | -   | 350  | 1 --- | R.DVQELKDAK.S                           |
| 1045.5144                                                                                                                                                                                                                                                                                                                                                                                                                                                                                                                                                                                                                                                                    | 1044.5071 | 1044.5451 | -36.38 | 342   | -   | 350  | 1 --- | R.DVQELKDAK.S                           |
| 1151.6809                                                                                                                                                                                                                                                                                                                                                                                                                                                                                                                                                                                                                                                                    | 1150.6736 | 1150.5843 | 77.6   | 602   | -   | 612  | 1 --- | R.SGDGHQPLGRK.K                         |
| 1165.6895                                                                                                                                                                                                                                                                                                                                                                                                                                                                                                                                                                                                                                                                    | 1164.6822 | 1164.5775 | 89.9   | 1179  | -   | 1188 | 0 --- | K.ENVPLEPPR.S                           |
| 1165.6895                                                                                                                                                                                                                                                                                                                                                                                                                                                                                                                                                                                                                                                                    | 1164.6822 | 1164.5775 | 89.9   | 1179  | -   | 1188 | 0 --- | K.ENVPLEPPR.S                           |
| 1179.5537                                                                                                                                                                                                                                                                                                                                                                                                                                                                                                                                                                                                                                                                    | 1178.5464 | 1178.5905 | -37.37 | 601   | -   | 611  | 1 --- | R.RSGDGHQPLGR.K                         |
| 1302.8025                                                                                                                                                                                                                                                                                                                                                                                                                                                                                                                                                                                                                                                                    | 1301.7952 | 1301.7078 | 67.1   | 1191  | -   | 1202 | 0 --- | K.ASLIEVDLSDLK.A                        |
| 1993.8938                                                                                                                                                                                                                                                                                                                                                                                                                                                                                                                                                                                                                                                                    | 1992.8865 | 1993.0341 | -74.05 | 98    | -   | 116  | 0 --- | K.GDQVASLQGHQSVIQLSR.K                  |
| 2193.0378                                                                                                                                                                                                                                                                                                                                                                                                                                                                                                                                                                                                                                                                    | 2192.0305 | 2192.1048 | -33.90 | 1532  | -   | 1550 | 0 --- | K.TMSVSVDALTIHNLWQPK.R + Oxidation (M)  |
| 2305.0723                                                                                                                                                                                                                                                                                                                                                                                                                                                                                                                                                                                                                                                                    | 2304.0650 | 2304.2188 | -66.72 | 561   | -   | 580  | 1 --- | K.TDSFFLEPLMPVLRPAKEK.Q + Oxidation (M) |
| 2459.1550                                                                                                                                                                                                                                                                                                                                                                                                                                                                                                                                                                                                                                                                    | 2458.1477 | 2458.1711 | -9.50  | 1191  | -   | 1213 | 1 --- | K.ASLIEVDLSDLKAPDEGTEGR.D               |
| 2477.1138                                                                                                                                                                                                                                                                                                                                                                                                                                                                                                                                                                                                                                                                    | 2476.1065 | 2476.2420 | -54.72 | 1458  | -   | 1477 | 1 --- | K.NSILEELEKCDANHYIILFR.D                |
| 2477.1138                                                                                                                                                                                                                                                                                                                                                                                                                                                                                                                                                                                                                                                                    | 2476.1065 | 2476.2420 | -54.71 | 1458  | -   | 1477 | 1 --- | K.NSILEELEKCDANHYIILFR.D                |
| 2492.1714                                                                                                                                                                                                                                                                                                                                                                                                                                                                                                                                                                                                                                                                    | 2491.1641 | 2491.2707 | -42.77 | 370   | -   | 394  | 1 --- | K.RSFLGSPAAASPADLQLGEPEPPGK.G           |
| <b>No match to:</b> 811.4696, 848.4903, 850.0149, 850.5021, 853.4834, 856.4824, 865.9890, 868.5110, 876.9973, 882.5262, 882.5263, 892.9677, 951.5844, 953.5057, 996.5507, 1017.6264, 1017.6264, 1033.6548, 1033.6548, 1051.6622, 1051.6622, 1131.6659, 1133.6655, 1147.6840, 1236.6508, 1300.7965, 1307.6320, 1316.8201, 1334.8311, 1334.8311, 1408.5692, 1408.5692, 1427.7416, 1430.5653, 1448.8605, 1448.8605, 1457.6237, 1475.6832, 1617.9929, 1617.9929, 1732.0273, 1775.7623, 1901.1764, 1940.8547, 2056.9478, 2211.0134, 2221.0344, 2225.0469, 2230.1272, 2233.0085, 2239.0554, 2248.9812, 2261.0361, 2265.0583, 2283.0833, 2321.0693, 2470.2014, 2499.1167, 3337.7234 |           |           |        |       |     |      |       |                                         |

20. [A0A3Q1NQ99](#) Mass: 136628 Score: 35 Expect: 43 Matches: 16  
SRC kinase signaling inhibitor 1 OS=Bos taurus OX=9913 GN=SRCIN1 PE=4 SV=1

| Observed                                                                                                                                                                                                                                                                                                                                                                                                                                                                                                                                                                                                                                                                                                                 | Mr(expt)  | Mr(calc)  | ppm    | Start | End | Miss | Ions  | Peptide                                     |
|--------------------------------------------------------------------------------------------------------------------------------------------------------------------------------------------------------------------------------------------------------------------------------------------------------------------------------------------------------------------------------------------------------------------------------------------------------------------------------------------------------------------------------------------------------------------------------------------------------------------------------------------------------------------------------------------------------------------------|-----------|-----------|--------|-------|-----|------|-------|---------------------------------------------|
| 853.4834                                                                                                                                                                                                                                                                                                                                                                                                                                                                                                                                                                                                                                                                                                                 | 852.4761  | 852.4705  | 6.59   | 554   | -   | 561  | 0 --- | R.LPPSSPQK.L                                |
| 864.4868                                                                                                                                                                                                                                                                                                                                                                                                                                                                                                                                                                                                                                                                                                                 | 863.4795  | 863.3998  | 92.3   | 830   | -   | 836  | 0 --- | R.DVSHNHR.L                                 |
| 953.5057                                                                                                                                                                                                                                                                                                                                                                                                                                                                                                                                                                                                                                                                                                                 | 952.4984  | 952.4548  | 45.8   | 1211  | -   | 1217 | 1 --- | K.QRAEYMR.I                                 |
| 1033.6548                                                                                                                                                                                                                                                                                                                                                                                                                                                                                                                                                                                                                                                                                                                | 1032.6475 | 1032.5465 | 97.9   | 586   | -   | 594  | 1 --- | R.GSPVRQSF.R                                |
| 1033.6548                                                                                                                                                                                                                                                                                                                                                                                                                                                                                                                                                                                                                                                                                                                | 1032.6475 | 1032.5465 | 97.9   | 586   | -   | 594  | 1 --- | R.GSPVRQSF.R                                |
| 1131.6659                                                                                                                                                                                                                                                                                                                                                                                                                                                                                                                                                                                                                                                                                                                | 1130.6586 | 1130.6183 | 35.7   | 852   | -   | 861  | 0 --- | K.QLGETLTTELK.A                             |
| 1300.7965                                                                                                                                                                                                                                                                                                                                                                                                                                                                                                                                                                                                                                                                                                                | 1299.7892 | 1299.6783 | 85.4   | 1193  | -   | 1205 | 1 --- | R.LKTAQQGAGSPDK.G                           |
| 1408.5692                                                                                                                                                                                                                                                                                                                                                                                                                                                                                                                                                                                                                                                                                                                | 1407.5619 | 1407.6664 | -74.20 | 985   | -   | 997  | 1 --- | R.SMDKAVSVEAER.D + Oxidation (M)            |
| 1408.5692                                                                                                                                                                                                                                                                                                                                                                                                                                                                                                                                                                                                                                                                                                                | 1407.5619 | 1407.6664 | -74.19 | 985   | -   | 997  | 1 --- | R.SMDKAVSVEAER.D + Oxidation (M)            |
| 1427.7416                                                                                                                                                                                                                                                                                                                                                                                                                                                                                                                                                                                                                                                                                                                | 1426.7343 | 1426.7780 | -30.58 | 314   | -   | 326  | 1 --- | K.SPNTAILIKDEAR.N                           |
| 1457.6237                                                                                                                                                                                                                                                                                                                                                                                                                                                                                                                                                                                                                                                                                                                | 1456.6164 | 1456.6735 | -39.21 | 539   | -   | 553  | 0 --- | K.AAGGGPLYGDGYGFR.L                         |
| 1775.7623                                                                                                                                                                                                                                                                                                                                                                                                                                                                                                                                                                                                                                                                                                                | 1774.7550 | 1774.7904 | -19.94 | 685   | -   | 703  | 0 --- | K.IEGSNGAATPSAPCGSGR.S                      |
| 1993.8938                                                                                                                                                                                                                                                                                                                                                                                                                                                                                                                                                                                                                                                                                                                | 1992.8865 | 1993.0051 | -59.48 | 1213  | -   | 1229 | 1 --- | R.AEYMRIQAQQQATKPSK.E + Oxidation (M)       |
| 2305.0723                                                                                                                                                                                                                                                                                                                                                                                                                                                                                                                                                                                                                                                                                                                | 2304.0650 | 2304.2181 | -66.43 | 654   | -   | 674  | 1 --- | R.MEAMEKQIASLTGLVQSALLR.G + Oxidation (M)   |
| 2321.0693                                                                                                                                                                                                                                                                                                                                                                                                                                                                                                                                                                                                                                                                                                                | 2320.0620 | 2320.2130 | -65.08 | 654   | -   | 674  | 1 --- | R.MEAMEKQIASLTGLVQSALLR.G + 2 Oxidation (M) |
| 2459.1550                                                                                                                                                                                                                                                                                                                                                                                                                                                                                                                                                                                                                                                                                                                | 2458.1477 | 2458.1169 | 12.5   | 1162  | -   | 1184 | 1 --- | K.DEDDEDRIIAELESGGGSVPPMK.V                 |
| <b>No match to:</b> 811.4696, 842.4688, 848.4903, 850.0149, 850.5021, 856.4824, 865.9890, 868.5110, 870.5007, 876.9973, 882.5262, 882.5263, 892.9677, 951.5844, 996.5507, 1017.6264, 1017.6264, 1045.5144, 1045.5144, 1051.6622, 1051.6622, 1133.6655, 1147.6840, 1151.6809, 1165.6895, 1165.6895, 1179.5537, 1236.6508, 1302.8025, 1307.6320, 1316.8201, 1334.8311, 1334.8311, 1408.5692, 1408.5692, 1427.7416, 1430.5653, 1448.8605, 1448.8605, 1475.6832, 1617.9929, 1617.9929, 1732.0273, 1901.1764, 1940.8547, 2056.9478, 2193.0378, 2211.0134, 2221.0344, 2225.0469, 2230.1272, 2233.0085, 2239.0554, 2248.9812, 2261.0361, 2265.0583, 2283.0833, 2470.2014, 2477.1138, 2477.1138, 2492.1714, 2499.1167, 3337.7234 |           |           |        |       |     |      |       |                                             |

21. [A0A4W2GMF0](#) Mass: 148991 Score: 35 Expect: 47 Matches: 16  
Coiled-coil domain containing 171 OS=Bos indicus x Bos taurus OX=30522 GN=CCDC171 PE=4 SV=1

| Observed                                                                                                                                                                                                                                                                                                                                                                                                                                                                                                                                                                                                                                                                               | Mr(expt)  | Mr(calc)  | ppm    | Start | End | Miss | Ions  | Peptide                                    |
|----------------------------------------------------------------------------------------------------------------------------------------------------------------------------------------------------------------------------------------------------------------------------------------------------------------------------------------------------------------------------------------------------------------------------------------------------------------------------------------------------------------------------------------------------------------------------------------------------------------------------------------------------------------------------------------|-----------|-----------|--------|-------|-----|------|-------|--------------------------------------------|
| 864.4868                                                                                                                                                                                                                                                                                                                                                                                                                                                                                                                                                                                                                                                                               | 863.4795  | 863.4389  | 47.1   | 650   | -   | 656  | 0 --- | K.FQEIAEK.N                                |
| 996.5507                                                                                                                                                                                                                                                                                                                                                                                                                                                                                                                                                                                                                                                                               | 995.5434  | 995.5189  | 24.7   | 940   | -   | 947  | 0 --- | K.QIFGFTQR.L                               |
| 1045.5144                                                                                                                                                                                                                                                                                                                                                                                                                                                                                                                                                                                                                                                                              | 1044.5071 | 1044.4447 | 59.8   | 620   | -   | 627  | 0 --- | K.AQESCWHK.Q                               |
| 1045.5144                                                                                                                                                                                                                                                                                                                                                                                                                                                                                                                                                                                                                                                                              | 1044.5071 | 1044.4447 | 59.8   | 620   | -   | 627  | 0 --- | K.AQESCWHK.Q                               |
| 1179.5537                                                                                                                                                                                                                                                                                                                                                                                                                                                                                                                                                                                                                                                                              | 1178.5464 | 1178.5965 | -42.47 | 1055  | -   | 1064 | 1 --- | K.SLSEAKMELR.R + Oxidation (M)             |
| 1236.6508                                                                                                                                                                                                                                                                                                                                                                                                                                                                                                                                                                                                                                                                              | 1235.6435 | 1235.6180 | 20.7   | 18    | -   | 28   | 1 --- | K.NASSDIKQMVK.S + Oxidation (M)            |
| 1475.6832                                                                                                                                                                                                                                                                                                                                                                                                                                                                                                                                                                                                                                                                              | 1474.6759 | 1474.7337 | -39.18 | 277   | -   | 290  | 0 --- | K.ASQAEAVADLEMIK.N                         |
| 1617.9929                                                                                                                                                                                                                                                                                                                                                                                                                                                                                                                                                                                                                                                                              | 1616.9856 | 1616.8444 | 87.4   | 798   | -   | 812  | 1 --- | R.EGIGVLVCTGELKDK.H                        |
| 1617.9929                                                                                                                                                                                                                                                                                                                                                                                                                                                                                                                                                                                                                                                                              | 1616.9856 | 1616.8444 | 87.4   | 798   | -   | 812  | 1 --- | R.EGIGVLVCTGELKDK.H                        |
| 1732.0273                                                                                                                                                                                                                                                                                                                                                                                                                                                                                                                                                                                                                                                                              | 1731.0200 | 1730.8547 | 95.5   | 2     | -   | 17   | 1 --- | M.NSNTSSNTPGDIQRLK.N                       |
| 1993.8938                                                                                                                                                                                                                                                                                                                                                                                                                                                                                                                                                                                                                                                                              | 1992.8865 | 1992.9826 | -48.20 | 277   | -   | 294  | 1 --- | K.ASQAEAVADLEMIKNEFK.E                     |
| 2221.0344                                                                                                                                                                                                                                                                                                                                                                                                                                                                                                                                                                                                                                                                              | 2220.0271 | 2220.1790 | -68.41 | 718   | -   | 735  | 1 --- | R.DFLQEQQVNTPELLKLEVR.T                    |
| 2261.0361                                                                                                                                                                                                                                                                                                                                                                                                                                                                                                                                                                                                                                                                              | 2260.0288 | 2260.0794 | -22.36 | 157   | -   | 174  | 1 --- | R.DNIIQNCHQEYDLLTKK.S                      |
| 2477.1138                                                                                                                                                                                                                                                                                                                                                                                                                                                                                                                                                                                                                                                                              | 2476.1065 | 2476.2494 | -57.71 | 688   | -   | 709  | 1 --- | R.EKTSLLVACALMAGAFYPLYSR.S + Oxidation (M) |
| 2477.1138                                                                                                                                                                                                                                                                                                                                                                                                                                                                                                                                                                                                                                                                              | 2476.1065 | 2476.2494 | -57.70 | 688   | -   | 709  | 1 --- | R.EKTSLLVACALMAGAFYPLYSR.S + Oxidation (M) |
| 2492.1714                                                                                                                                                                                                                                                                                                                                                                                                                                                                                                                                                                                                                                                                              | 2491.1641 | 2491.2476 | -33.49 | 1259  | -   | 1283 | 0 --- | K.ETLINSVPLASSNSSPVMTSATAK.R               |
| <b>No match to:</b> 811.4696, 842.4688, 848.4903, 850.0149, 850.5021, 853.4834, 856.4824, 865.9890, 868.5110, 870.5007, 876.9973, 882.5262, 882.5263, 892.9677, 951.5844, 953.5057, 1017.6264, 1017.6264, 1033.6548, 1033.6548, 1051.6622, 1051.6622, 1131.6659, 1133.6655, 1147.6840, 1151.6809, 1165.6895, 1165.6895, 1300.7965, 1302.8025, 1307.6320, 1316.8201, 1334.8311, 1334.8311, 1408.5692, 1408.5692, 1427.7416, 1430.5653, 1448.8605, 1448.8605, 1457.6237, 1775.7623, 1901.1764, 1940.8547, 2056.9478, 2193.0378, 2211.0134, 2225.0469, 2230.1272, 2233.0085, 2239.0554, 2248.9812, 2265.0583, 2283.0833, 2305.0723, 2321.0693, 2459.1550, 2470.2014, 2499.1167, 3337.7234 |           |           |        |       |     |      |       |                                            |

22. [A0A3Q1LVB1](#) Mass: 134506 Score: 34 Expect: 49 Matches: 16  
SRC kinase signaling inhibitor 1 OS=Bos taurus OX=9913 GN=SRCIN1 PE=4 SV=1

| Observed  | Mr(expt)  | Mr(calc)  | ppm  | Start | End | Miss | Ions  | Peptide      |
|-----------|-----------|-----------|------|-------|-----|------|-------|--------------|
| 853.4834  | 852.4761  | 852.4705  | 6.59 | 533   | -   | 540  | 0 --- | R.LPPSSPQK.L |
| 864.4868  | 863.4795  | 863.3998  | 92.3 | 809   | -   | 815  | 0 --- | R.DVSHNHR.L  |
| 953.5057  | 952.4984  | 952.4548  | 45.8 | 1190  | -   | 1196 | 1 --- | K.QRAEYMR.I  |
| 1033.6548 | 1032.6475 | 1032.5465 | 97.9 | 565   | -   | 573  | 1 --- | R.GSPVRQSF.R |

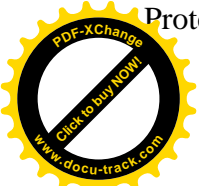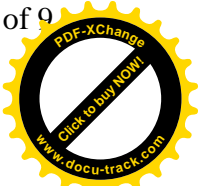

|                                                                                                                                                                                                                                                                                                                                                                                                                                                                                                                                                                                                                                                                                                    |           |           |        |      |   |      |   |     |                                             |
|----------------------------------------------------------------------------------------------------------------------------------------------------------------------------------------------------------------------------------------------------------------------------------------------------------------------------------------------------------------------------------------------------------------------------------------------------------------------------------------------------------------------------------------------------------------------------------------------------------------------------------------------------------------------------------------------------|-----------|-----------|--------|------|---|------|---|-----|---------------------------------------------|
| 1033.6548                                                                                                                                                                                                                                                                                                                                                                                                                                                                                                                                                                                                                                                                                          | 1032.6475 | 1032.5465 | 97.9   | 565  | - | 573  | 1 | --- | R.GSPVRQSF.R.K                              |
| 1131.6659                                                                                                                                                                                                                                                                                                                                                                                                                                                                                                                                                                                                                                                                                          | 1130.6586 | 1130.6183 | 35.7   | 831  | - | 840  | 0 | --- | K.QLGETLTELK.A                              |
| 1300.7965                                                                                                                                                                                                                                                                                                                                                                                                                                                                                                                                                                                                                                                                                          | 1299.7892 | 1299.6783 | 85.4   | 1172 | - | 1184 | 1 | --- | R.LKTAQQAGSPDK.G                            |
| 1408.5692                                                                                                                                                                                                                                                                                                                                                                                                                                                                                                                                                                                                                                                                                          | 1407.5619 | 1407.6664 | -74.20 | 964  | - | 976  | 1 | --- | R.SMDKAVSVEAAER.D + Oxidation (M)           |
| 1408.5692                                                                                                                                                                                                                                                                                                                                                                                                                                                                                                                                                                                                                                                                                          | 1407.5619 | 1407.6664 | -74.19 | 964  | - | 976  | 1 | --- | R.SMDKAVSVEAAER.D + Oxidation (M)           |
| 1427.7416                                                                                                                                                                                                                                                                                                                                                                                                                                                                                                                                                                                                                                                                                          | 1426.7343 | 1426.7780 | -30.58 | 293  | - | 305  | 1 | --- | K.SPNTAILIKDEAR.N                           |
| 1457.6237                                                                                                                                                                                                                                                                                                                                                                                                                                                                                                                                                                                                                                                                                          | 1456.6164 | 1456.6735 | -39.21 | 518  | - | 532  | 0 | --- | K.AAGGGPLYGDYGF.R.L                         |
| 1775.7623                                                                                                                                                                                                                                                                                                                                                                                                                                                                                                                                                                                                                                                                                          | 1774.7550 | 1774.7904 | -19.94 | 664  | - | 682  | 0 | --- | K.IEGSNGAATPAPCGSGSR.S                      |
| 1993.8938                                                                                                                                                                                                                                                                                                                                                                                                                                                                                                                                                                                                                                                                                          | 1992.8865 | 1993.0051 | -59.48 | 1192 | - | 1208 | 1 | --- | R.AEYMRQAQQATKPSK.E + Oxidation (M)         |
| 2305.0723                                                                                                                                                                                                                                                                                                                                                                                                                                                                                                                                                                                                                                                                                          | 2304.0650 | 2304.2181 | -66.43 | 633  | - | 653  | 1 | --- | R.MEAMEKQIASLTGLVQSALLR.G + Oxidation (M)   |
| 2321.0693                                                                                                                                                                                                                                                                                                                                                                                                                                                                                                                                                                                                                                                                                          | 2320.0620 | 2320.2130 | -65.08 | 633  | - | 653  | 1 | --- | R.MEAMEKQIASLTGLVQSALLR.G + 2 Oxidation (M) |
| 2459.1550                                                                                                                                                                                                                                                                                                                                                                                                                                                                                                                                                                                                                                                                                          | 2458.1477 | 2458.1169 | 12.5   | 1141 | - | 1163 | 1 | --- | K.DEDDEDRIAELESGGSVPPMK.V                   |
| <b>No match to:</b> 811.4696, 842.4688, 848.4903, 850.0149, 850.5021, 856.4824, 865.9890, 868.5110, 870.5007, 876.9973, 882.5262, 882.5263, 892.9677, 951.5844, 996.5507, 1017.6264, 1017.6264, 1045.5144, 1045.5144, 1051.6622, 1051.6622, 1133.6655, 1147.6840, 1151.6809, 1165.6895, 1165.6895, 1165.6895, 1179.5537, 1236.6508, 1302.8025, 1307.6320, 1316.8201, 1334.8311, 1334.8311, 1430.5653, 1448.8605, 1448.8605, 1475.6832, 1617.9929, 1617.9929, 1732.0273, 1901.1764, 1940.8547, 2056.9478, 2193.0378, 2211.0134, 2221.0344, 2225.0469, 2230.1272, 2233.0085, 2239.0554, 2248.9812, 2261.0361, 2265.0583, 2283.0833, 2470.2014, 2477.1138, 2477.1138, 2492.1714, 2499.1167, 3337.7234 |           |           |        |      |   |      |   |     |                                             |

23. [Q80RC9](#) Mass: 50101 Score: 34 Expect: 50 Matches: 9

| Bo17 (Fragment) OS=Bovine herpesvirus 4 OX=10385 GN=Bo17 PE=4 SV=1                                                                                                                                                                                                                                                                                                                                                                                                                                                                                                                                                                                                                                                                                                |           |           |        |       |     |      |      |         |                                          |
|-------------------------------------------------------------------------------------------------------------------------------------------------------------------------------------------------------------------------------------------------------------------------------------------------------------------------------------------------------------------------------------------------------------------------------------------------------------------------------------------------------------------------------------------------------------------------------------------------------------------------------------------------------------------------------------------------------------------------------------------------------------------|-----------|-----------|--------|-------|-----|------|------|---------|------------------------------------------|
| Observed                                                                                                                                                                                                                                                                                                                                                                                                                                                                                                                                                                                                                                                                                                                                                          | Mr(expt)  | Mr(calc)  | ppm    | Start | End | Miss | Ions | Peptide |                                          |
| 1475.6832                                                                                                                                                                                                                                                                                                                                                                                                                                                                                                                                                                                                                                                                                                                                                         | 1474.6759 | 1474.6973 | -14.50 | 247   | -   | 259  | 1    | ---     | K.NSMESIEPPESKK.N                        |
| 1617.9929                                                                                                                                                                                                                                                                                                                                                                                                                                                                                                                                                                                                                                                                                                                                                         | 1616.9856 | 1616.8708 | 71.0   | 348   | -   | 361  | 1    | ---     | K.YHISDMTAIARLVK.W                       |
| 1617.9929                                                                                                                                                                                                                                                                                                                                                                                                                                                                                                                                                                                                                                                                                                                                                         | 1616.9856 | 1616.8708 | 71.0   | 348   | -   | 361  | 1    | ---     | K.YHISDMTAIARLVK.W                       |
| 1940.8547                                                                                                                                                                                                                                                                                                                                                                                                                                                                                                                                                                                                                                                                                                                                                         | 1939.8474 | 1940.0214 | -89.70 | 73    | -   | 90   | 1    | ---     | R.GDQEAQAQALLDNLEVKK.K                   |
| 1993.8938                                                                                                                                                                                                                                                                                                                                                                                                                                                                                                                                                                                                                                                                                                                                                         | 1992.8865 | 1993.0376 | -75.82 | 171   | -   | 188  | 1    | ---     | K.EAVKAIISCLPNVFMASK.L + Oxidation (M)   |
| 2225.0469                                                                                                                                                                                                                                                                                                                                                                                                                                                                                                                                                                                                                                                                                                                                                         | 2224.0396 | 2224.0259 | 6.17   | 280   | -   | 299  | 0    | ---     | K.DPPPDNLPMFTGNAYFVASR.A + Oxidation (M) |
| 2233.0085                                                                                                                                                                                                                                                                                                                                                                                                                                                                                                                                                                                                                                                                                                                                                         | 2232.0012 | 2232.0555 | -24.31 | 200   | -   | 218  | 0    | ---     | R.VQADLNCMEDLLQSSVPWK.Y                  |
| 2248.9812                                                                                                                                                                                                                                                                                                                                                                                                                                                                                                                                                                                                                                                                                                                                                         | 2247.9739 | 2248.0504 | -34.02 | 200   | -   | 218  | 0    | ---     | R.VQADLNCMEDLLQSSVPWK.Y + Oxidation (M)  |
| 2283.0833                                                                                                                                                                                                                                                                                                                                                                                                                                                                                                                                                                                                                                                                                                                                                         | 2282.0760 | 2282.1113 | -15.48 | 92    | -   | 109  | 1    | ---     | K.RPPLTDITYLINITRD.CER.F                 |
| <b>No match to:</b> 811.4696, 842.4688, 848.4903, 850.0149, 850.5021, 853.4834, 856.4824, 864.4868, 865.9890, 868.5110, 870.5007, 876.9973, 882.5262, 882.5263, 892.9677, 951.5844, 953.5057, 996.5507, 1017.6264, 1017.6264, 1033.6548, 1033.6548, 1045.5144, 1045.5144, 1051.6622, 1051.6622, 1131.6659, 1133.6655, 1147.6840, 1151.6809, 1165.6895, 1165.6895, 1179.5537, 1236.6508, 1300.7965, 1302.8025, 1307.6320, 1316.8201, 1334.8311, 1334.8311, 1408.5692, 1408.5692, 1427.7416, 1430.5653, 1448.8605, 1448.8605, 1457.6237, 1732.0273, 1775.7623, 1901.1764, 2056.9478, 2193.0378, 2211.0134, 2221.0344, 2230.1272, 2239.0554, 2261.0361, 2265.0583, 2305.0723, 2321.0693, 2459.1550, 2470.2014, 2477.1138, 2477.1138, 2492.1714, 2499.1167, 3337.7234 |           |           |        |       |     |      |      |         |                                          |

24. [Q80RDO](#) Mass: 49973 Score: 34 Expect: 56 Matches: 9

| Bo17 (Fragment) OS=Bovine herpesvirus 4 OX=10385 GN=Bo17 PE=4 SV=1                                                                                                                                                                                                                                                                                                                                                                                                                                                                                                                                                                                                                                                                                                |           |           |        |       |     |      |      |         |                                          |
|-------------------------------------------------------------------------------------------------------------------------------------------------------------------------------------------------------------------------------------------------------------------------------------------------------------------------------------------------------------------------------------------------------------------------------------------------------------------------------------------------------------------------------------------------------------------------------------------------------------------------------------------------------------------------------------------------------------------------------------------------------------------|-----------|-----------|--------|-------|-----|------|------|---------|------------------------------------------|
| Observed                                                                                                                                                                                                                                                                                                                                                                                                                                                                                                                                                                                                                                                                                                                                                          | Mr(expt)  | Mr(calc)  | ppm    | Start | End | Miss | Ions | Peptide |                                          |
| 1475.6832                                                                                                                                                                                                                                                                                                                                                                                                                                                                                                                                                                                                                                                                                                                                                         | 1474.6759 | 1474.6973 | -14.50 | 246   | -   | 258  | 1    | ---     | K.NSMESIEPPESKK.N                        |
| 1617.9929                                                                                                                                                                                                                                                                                                                                                                                                                                                                                                                                                                                                                                                                                                                                                         | 1616.9856 | 1616.8708 | 71.0   | 347   | -   | 360  | 1    | ---     | K.YHISDMTAIARLVK.W                       |
| 1617.9929                                                                                                                                                                                                                                                                                                                                                                                                                                                                                                                                                                                                                                                                                                                                                         | 1616.9856 | 1616.8708 | 71.0   | 347   | -   | 360  | 1    | ---     | K.YHISDMTAIARLVK.W                       |
| 1940.8547                                                                                                                                                                                                                                                                                                                                                                                                                                                                                                                                                                                                                                                                                                                                                         | 1939.8474 | 1940.0214 | -89.70 | 72    | -   | 89   | 1    | ---     | R.GDQEAQAQALLDNLEVKK.K                   |
| 1993.8938                                                                                                                                                                                                                                                                                                                                                                                                                                                                                                                                                                                                                                                                                                                                                         | 1992.8865 | 1993.0376 | -75.82 | 170   | -   | 187  | 1    | ---     | K.EAVKAIISCLPNVFMASK.L + Oxidation (M)   |
| 2225.0469                                                                                                                                                                                                                                                                                                                                                                                                                                                                                                                                                                                                                                                                                                                                                         | 2224.0396 | 2224.0259 | 6.17   | 279   | -   | 298  | 0    | ---     | K.DPPPDNLPMFTGNAYFVASR.A + Oxidation (M) |
| 2233.0085                                                                                                                                                                                                                                                                                                                                                                                                                                                                                                                                                                                                                                                                                                                                                         | 2232.0012 | 2232.0555 | -24.31 | 199   | -   | 217  | 0    | ---     | R.VQADLNCMEDLLQSSVPWK.Y                  |
| 2248.9812                                                                                                                                                                                                                                                                                                                                                                                                                                                                                                                                                                                                                                                                                                                                                         | 2247.9739 | 2248.0504 | -34.02 | 199   | -   | 217  | 0    | ---     | R.VQADLNCMEDLLQSSVPWK.Y + Oxidation (M)  |
| 2283.0833                                                                                                                                                                                                                                                                                                                                                                                                                                                                                                                                                                                                                                                                                                                                                         | 2282.0760 | 2282.1113 | -15.48 | 91    | -   | 108  | 1    | ---     | K.RPPLTDITYLINITRD.CER.F                 |
| <b>No match to:</b> 811.4696, 842.4688, 848.4903, 850.0149, 850.5021, 853.4834, 856.4824, 864.4868, 865.9890, 868.5110, 870.5007, 876.9973, 882.5262, 882.5263, 892.9677, 951.5844, 953.5057, 996.5507, 1017.6264, 1017.6264, 1033.6548, 1033.6548, 1045.5144, 1045.5144, 1051.6622, 1051.6622, 1131.6659, 1133.6655, 1147.6840, 1151.6809, 1165.6895, 1165.6895, 1179.5537, 1236.6508, 1300.7965, 1302.8025, 1307.6320, 1316.8201, 1334.8311, 1334.8311, 1408.5692, 1408.5692, 1427.7416, 1430.5653, 1448.8605, 1448.8605, 1457.6237, 1732.0273, 1775.7623, 1901.1764, 2056.9478, 2193.0378, 2211.0134, 2221.0344, 2230.1272, 2239.0554, 2261.0361, 2265.0583, 2305.0723, 2321.0693, 2459.1550, 2470.2014, 2477.1138, 2477.1138, 2492.1714, 2499.1167, 3337.7234 |           |           |        |       |     |      |      |         |                                          |

25. [A0A4W2IBE1](#) Mass: 60650 Score: 34 Expect: 57 Matches: 6

| RIC8 guanine nucleotide exchange factor B OS=Bos indicus x Bos taurus OX=30522 GN=RIC8B PE=4 SV=1                                                                                                                                                                                                                                                                                                                                                                                                                                                                                                                                                                                                                                                                                                    |           |           |        |       |     |      |      |         |                                     |
|------------------------------------------------------------------------------------------------------------------------------------------------------------------------------------------------------------------------------------------------------------------------------------------------------------------------------------------------------------------------------------------------------------------------------------------------------------------------------------------------------------------------------------------------------------------------------------------------------------------------------------------------------------------------------------------------------------------------------------------------------------------------------------------------------|-----------|-----------|--------|-------|-----|------|------|---------|-------------------------------------|
| Observed                                                                                                                                                                                                                                                                                                                                                                                                                                                                                                                                                                                                                                                                                                                                                                                             | Mr(expt)  | Mr(calc)  | ppm    | Start | End | Miss | Ions | Peptide |                                     |
| 848.4903                                                                                                                                                                                                                                                                                                                                                                                                                                                                                                                                                                                                                                                                                                                                                                                             | 847.4830  | 847.4473  | 42.1   | 515   | -   | 521  | 0    | ---     | K.LVNMLDK.L + Oxidation (M)         |
| 856.4824                                                                                                                                                                                                                                                                                                                                                                                                                                                                                                                                                                                                                                                                                                                                                                                             | 855.4751  | 855.5430  | -79.30 | 79    | -   | 86   | 0    | ---     | K.VLVPVITK.E                        |
| 1775.7623                                                                                                                                                                                                                                                                                                                                                                                                                                                                                                                                                                                                                                                                                                                                                                                            | 1774.7550 | 1774.8784 | -69.53 | 247   | -   | 261  | 1    | ---     | K.ESESHQFRVMAAVLR.H + Oxidation (M) |
| 2225.0469                                                                                                                                                                                                                                                                                                                                                                                                                                                                                                                                                                                                                                                                                                                                                                                            | 2224.0396 | 2224.1158 | -34.24 | 356   | -   | 375  | 1    | ---     | K.GSSYREGLTPLVSLLT.ECSR.A           |
| 2477.1138                                                                                                                                                                                                                                                                                                                                                                                                                                                                                                                                                                                                                                                                                                                                                                                            | 2476.1065 | 2476.2584 | -61.36 | 98    | -   | 119  | 1    | 17      | K.LNESDSDSLEKVSFPVIVESLK.C          |
| 2477.1138                                                                                                                                                                                                                                                                                                                                                                                                                                                                                                                                                                                                                                                                                                                                                                                            | 2476.1065 | 2476.2584 | -61.35 | 98    | -   | 119  | 1    | ---     | K.LNESDSDSLEKVSFPVIVESLK.C          |
| <b>No match to:</b> 811.4696, 842.4688, 850.0149, 850.5021, 853.4834, 864.4868, 865.9890, 868.5110, 870.5007, 876.9973, 882.5262, 882.5263, 892.9677, 951.5844, 953.5057, 996.5507, 1017.6264, 1017.6264, 1033.6548, 1033.6548, 1045.5144, 1045.5144, 1051.6622, 1051.6622, 1131.6659, 1133.6655, 1147.6840, 1151.6809, 1165.6895, 1165.6895, 1179.5537, 1236.6508, 1300.7965, 1302.8025, 1307.6320, 1316.8201, 1334.8311, 1334.8311, 1408.5692, 1408.5692, 1427.7416, 1430.5653, 1448.8605, 1448.8605, 1457.6237, 1475.6832, 1617.9929, 1617.9929, 1732.0273, 1901.1764, 1940.8547, 1993.8938, 2056.9478, 2193.0378, 2211.0134, 2221.0344, 2230.1272, 2233.0085, 2239.0554, 2248.9812, 2261.0361, 2265.0583, 2283.0833, 2305.0723, 2321.0693, 2459.1550, 2470.2014, 2492.1714, 2499.1167, 3337.7234 |           |           |        |       |     |      |      |         |                                     |

26. [A0A4W2GMI1](#) Mass: 61548 Score: 33 Expect: 61 Matches: 6

| RIC8 guanine nucleotide exchange factor B OS=Bos indicus x Bos taurus OX=30522 GN=RIC8B PE=4 SV=1                                                                                                                                                                                                                                                                                                                                                                                                                                                                                                                                                                                                                                                                                                    |           |           |        |       |     |      |      |         |                                     |
|------------------------------------------------------------------------------------------------------------------------------------------------------------------------------------------------------------------------------------------------------------------------------------------------------------------------------------------------------------------------------------------------------------------------------------------------------------------------------------------------------------------------------------------------------------------------------------------------------------------------------------------------------------------------------------------------------------------------------------------------------------------------------------------------------|-----------|-----------|--------|-------|-----|------|------|---------|-------------------------------------|
| Observed                                                                                                                                                                                                                                                                                                                                                                                                                                                                                                                                                                                                                                                                                                                                                                                             | Mr(expt)  | Mr(calc)  | ppm    | Start | End | Miss | Ions | Peptide |                                     |
| 848.4903                                                                                                                                                                                                                                                                                                                                                                                                                                                                                                                                                                                                                                                                                                                                                                                             | 847.4830  | 847.4473  | 42.1   | 515   | -   | 521  | 0    | ---     | K.LVNMLDK.L + Oxidation (M)         |
| 856.4824                                                                                                                                                                                                                                                                                                                                                                                                                                                                                                                                                                                                                                                                                                                                                                                             | 855.4751  | 855.5430  | -79.30 | 79    | -   | 86   | 0    | ---     | K.VLVPVITK.E                        |
| 1775.7623                                                                                                                                                                                                                                                                                                                                                                                                                                                                                                                                                                                                                                                                                                                                                                                            | 1774.7550 | 1774.8784 | -69.53 | 247   | -   | 261  | 1    | ---     | K.ESESHQFRVMAAVLR.H + Oxidation (M) |
| 2225.0469                                                                                                                                                                                                                                                                                                                                                                                                                                                                                                                                                                                                                                                                                                                                                                                            | 2224.0396 | 2224.1158 | -34.24 | 356   | -   | 375  | 1    | ---     | K.GSSYREGLTPLVSLLT.ECSR.A           |
| 2477.1138                                                                                                                                                                                                                                                                                                                                                                                                                                                                                                                                                                                                                                                                                                                                                                                            | 2476.1065 | 2476.2584 | -61.36 | 98    | -   | 119  | 1    | 17      | K.LNESDSDSLEKVSFPVIVESLK.C          |
| 2477.1138                                                                                                                                                                                                                                                                                                                                                                                                                                                                                                                                                                                                                                                                                                                                                                                            | 2476.1065 | 2476.2584 | -61.35 | 98    | -   | 119  | 1    | ---     | K.LNESDSDSLEKVSFPVIVESLK.C          |
| <b>No match to:</b> 811.4696, 842.4688, 850.0149, 850.5021, 853.4834, 864.4868, 865.9890, 868.5110, 870.5007, 876.9973, 882.5262, 882.5263, 892.9677, 951.5844, 953.5057, 996.5507, 1017.6264, 1017.6264, 1033.6548, 1033.6548, 1045.5144, 1045.5144, 1051.6622, 1051.6622, 1131.6659, 1133.6655, 1147.6840, 1151.6809, 1165.6895, 1165.6895, 1179.5537, 1236.6508, 1300.7965, 1302.8025, 1307.6320, 1316.8201, 1334.8311, 1334.8311, 1408.5692, 1408.5692, 1427.7416, 1430.5653, 1448.8605, 1448.8605, 1457.6237, 1475.6832, 1617.9929, 1617.9929, 1732.0273, 1901.1764, 1940.8547, 1993.8938, 2056.9478, 2193.0378, 2211.0134, 2221.0344, 2230.1272, 2233.0085, 2239.0554, 2248.9812, 2261.0361, 2265.0583, 2283.0833, 2305.0723, 2321.0693, 2459.1550, 2470.2014, 2492.1714, 2499.1167, 3337.7234 |           |           |        |       |     |      |      |         |                                     |

27. [E1BD35](#) Mass: 61548 Score: 33 Expect: 61 Matches: 6

| RIC8 guanine nucleotide exchange factor B OS=Bos taurus OX=9913 GN=RIC8B PE=4 SV=3 |          |          |        |       |     |      |      |         |                             |
|------------------------------------------------------------------------------------|----------|----------|--------|-------|-----|------|------|---------|-----------------------------|
| Observed                                                                           | Mr(expt) | Mr(calc) | ppm    | Start | End | Miss | Ions | Peptide |                             |
| 848.4903                                                                           | 847.4830 | 847.4473 | 42.1   | 515   | -   | 521  | 0    | ---     | K.LVNMLDK.L + Oxidation (M) |
| 856.4824                                                                           | 855.4751 | 855.5430 | -79.30 | 79    | -   | 86   | 0    | ---     | K.VLVPVITK.E                |

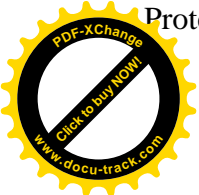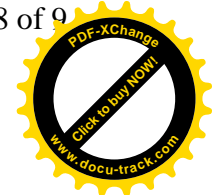

1775.7623 1774.7550 1774.8784 -69.53 247 - 261 1 --- K.ESESHQFRVMAAVLR.H + Oxidation (M)  
 2225.0469 2224.0396 2224.1158 -34.24 356 - 375 1 --- K.GSSYREGLTPVLSLLTECSR.A  
 2477.1138 2476.1065 2476.2584 -61.36 98 - 119 1 17 K.LNESDDSLSEKVSFPVIVESLK.C  
 2477.1138 2476.1065 2476.2584 -61.35 98 - 119 1 --- K.LNESDDSLSEKVSFPVIVESLK.C  
**No match to:** 811.4696, 842.4688, 850.0149, 850.5021, 853.4834, 864.4868, 865.9890, 868.5110, 870.5007, 876.9973, 882.5262, 882.5263, 892.9677, 951.5844, 953.5057, 996.5507, 1017.6264, 1017.6264, 1033.6548, 1033.6548, 1045.5144, 1045.5144, 1051.6622, 1051.6622, 1131.6659, 1133.6655, 1147.6840, 1151.6809, 1165.6895, 1165.6895, 1179.5537, 1236.6508, 1300.7965, 1302.8025, 1307.6320, 1316.8201, 1334.8311, 1334.8311, 1408.5692, 1408.5692, 1427.7416, 1430.5653, 1448.8605, 1448.8605, 1457.6237, 1475.6832, 1617.9929, 1617.9929, 1732.0273, 1901.1764, 1940.8547, 1993.8938, 2056.9478, 2193.0378, 2211.0134, 2221.0344, 2230.1272, 2233.0085, 2239.0554, 2248.9812, 2261.0361, 2265.0583, 2283.0833, 2305.0723, 2321.0693, 2459.1550, 2470.2014, 2492.1714, 2499.1167, 3337.7234

28. [A0A3Q1M3W0](#) Mass: 173871 Score: 33 Expect: 63 Matches: 17

Calmodulin regulated spectrin associated protein 1 OS=Bos taurus OX=9913 GN=CAMSAP1 PE=3 SV=1

| Observed  | Mr(expt)  | Mr(calc)  | ppm    | Start | End | Miss | Ions  | Peptide                                  |
|-----------|-----------|-----------|--------|-------|-----|------|-------|------------------------------------------|
| 842.4688  | 841.4615  | 841.5134  | -61.61 | 893   | -   | 899  | 1 --- | R.QRLQLGK.A                              |
| 864.4868  | 863.4795  | 863.4613  | 21.1   | 1313  | -   | 1318 | 1 --- | K.QEYLR.R.K                              |
| 870.5007  | 869.4934  | 869.4243  | 79.5   | 766   | -   | 772  | 1 --- | K.VKEHDDK.D                              |
| 1045.5144 | 1044.5071 | 1044.5451 | -36.38 | 353   | -   | 361  | 1 --- | R.DVQELKDAK.S                            |
| 1045.5144 | 1044.5071 | 1044.5451 | -36.38 | 353   | -   | 361  | 1 --- | R.DVQELKDAK.S                            |
| 1151.6809 | 1150.6736 | 1150.5843 | 77.6   | 613   | -   | 623  | 1 --- | R.SGDGHQPLGRK.K                          |
| 1165.6895 | 1164.6822 | 1164.5775 | 89.9   | 1190  | -   | 1199 | 0 --- | K.ENVPDLDEPPR.S                          |
| 1165.6895 | 1164.6822 | 1164.5775 | 89.9   | 1190  | -   | 1199 | 0 --- | K.ENVPDLDEPPR.S                          |
| 1179.5537 | 1178.5464 | 1178.5905 | -37.37 | 612   | -   | 622  | 1 --- | R.RSGDGHQPLGR.K                          |
| 1302.8025 | 1301.7952 | 1301.7078 | 67.1   | 1202  | -   | 1213 | 0 --- | K.ASLIEVDLSDLK.A                         |
| 1993.8938 | 1992.8865 | 1993.0341 | -74.05 | 98    | -   | 116  | 0 --- | K.GDQVASLQGHQSVIQALSR.K                  |
| 2193.0378 | 2192.0305 | 2192.1048 | -33.90 | 1543  | -   | 1561 | 0 --- | K.TMSVSVDAITIHNLWQPK.R + Oxidation (M)   |
| 2305.0723 | 2304.0650 | 2304.2188 | -66.72 | 572   | -   | 591  | 1 --- | K.TDSFFLEPLMPAVLRPAKEK.Q + Oxidation (M) |
| 2459.1550 | 2458.1477 | 2458.1711 | -9.50  | 1202  | -   | 1224 | 1 --- | K.ASLIEVDLSDLKAPDEDEGETEGR.D             |
| 2477.1138 | 2476.1065 | 2476.2420 | -54.72 | 1469  | -   | 1488 | 1 --- | K.NSILEELEKCDANHYIILFR.D                 |
| 2477.1138 | 2476.1065 | 2476.2420 | -54.71 | 1469  | -   | 1488 | 1 --- | K.NSILEELEKCDANHYIILFR.D                 |
| 2492.1714 | 2491.1641 | 2491.2707 | -42.77 | 381   | -   | 405  | 1 --- | K.RSFLGSPAAASPADLQLGEPEPPGK.G            |

**No match to:** 811.4696, 848.4903, 850.0149, 850.5021, 853.4834, 856.4824, 865.9890, 868.5110, 876.9973, 882.5262, 882.5263, 892.9677, 951.5844, 953.5057, 996.5507, 1017.6264, 1017.6264, 1033.6548, 1033.6548, 1051.6622, 1051.6622, 1131.6659, 1133.6655, 1147.6840, 1236.6508, 1300.7965, 1307.6320, 1316.8201, 1334.8311, 1334.8311, 1408.5692, 1408.5692, 1427.7416, 1430.5653, 1448.8605, 1448.8605, 1457.6237, 1475.6832, 1617.9929, 1617.9929, 1732.0273, 1775.7623, 1901.1764, 1940.8547, 2056.9478, 2211.0134, 2221.0344, 2225.0469, 2230.1272, 2233.0085, 2239.0554, 2248.9812, 2261.0361, 2265.0583, 2283.0833, 2321.0693, 2470.2014, 2499.1167, 3337.7234

29. [A0A4W2IDJ5](#) Mass: 62224 Score: 33 Expect: 64 Matches: 6

RIC8 guanine nucleotide exchange factor B OS=Bos indicus x Bos taurus OX=30522 GN=RIC8B PE=4 SV=1

| Observed  | Mr(expt)  | Mr(calc)  | ppm    | Start | End | Miss | Ions  | Peptide                             |
|-----------|-----------|-----------|--------|-------|-----|------|-------|-------------------------------------|
| 848.4903  | 847.4830  | 847.4473  | 42.1   | 499   | -   | 505  | 0 --- | K.LVNMLDK.L + Oxidation (M)         |
| 856.4824  | 855.4751  | 855.5430  | -79.30 | 63    | -   | 70   | 0 --- | K.VLPVPVITK.E                       |
| 1775.7623 | 1774.7550 | 1774.8784 | -69.53 | 231   | -   | 245  | 1 --- | K.ESESHQFRVMAAVLR.H + Oxidation (M) |
| 2225.0469 | 2224.0396 | 2224.1158 | -34.24 | 340   | -   | 359  | 1 --- | K.GSSYREGLTPVLSLLTECSR.A            |
| 2477.1138 | 2476.1065 | 2476.2584 | -61.36 | 82    | -   | 103  | 1 17  | K.LNESDDSLSEKVSFPVIVESLK.C          |
| 2477.1138 | 2476.1065 | 2476.2584 | -61.35 | 82    | -   | 103  | 1 --- | K.LNESDDSLSEKVSFPVIVESLK.C          |

**No match to:** 811.4696, 842.4688, 850.0149, 850.5021, 853.4834, 864.4868, 865.9890, 868.5110, 870.5007, 876.9973, 882.5262, 882.5263, 892.9677, 951.5844, 953.5057, 996.5507, 1017.6264, 1017.6264, 1033.6548, 1033.6548, 1051.6622, 1051.6622, 1131.6659, 1133.6655, 1147.6840, 1236.6508, 1300.7965, 1307.6320, 1316.8201, 1334.8311, 1334.8311, 1408.5692, 1408.5692, 1427.7416, 1430.5653, 1448.8605, 1448.8605, 1457.6237, 1475.6832, 1617.9929, 1617.9929, 1732.0273, 1901.1764, 1940.8547, 1993.8938, 2056.9478, 2193.0378, 2211.0134, 2221.0344, 2230.1272, 2233.0085, 2239.0554, 2248.9812, 2261.0361, 2265.0583, 2283.0833, 2305.0723, 2321.0693, 2459.1550, 2470.2014, 2492.1714, 2499.1167, 3337.7234

30. [A0A4W2F4T9](#) Mass: 128155 Score: 33 Expect: 66 Matches: 15

SRC kinase signaling inhibitor 1 OS=Bos indicus x Bos taurus OX=30522 GN=SRCIN1 PE=4 SV=1

| Observed  | Mr(expt)  | Mr(calc)  | ppm    | Start | End | Miss | Ions  | Peptide                                     |
|-----------|-----------|-----------|--------|-------|-----|------|-------|---------------------------------------------|
| 853.4834  | 852.4761  | 852.4705  | 6.59   | 512   | -   | 519  | 0 --- | R.LPPSSPQK.L                                |
| 864.4868  | 863.4795  | 863.3998  | 92.3   | 788   | -   | 794  | 0 --- | R.DVSHNHR.L                                 |
| 953.5057  | 952.4984  | 952.4548  | 45.8   | 1169  | -   | 1175 | 1 --- | K.QRAEYMR.I                                 |
| 1033.6548 | 1032.6475 | 1032.5465 | 97.9   | 544   | -   | 552  | 1 --- | R.GSPVRQSF.R.K                              |
| 1033.6548 | 1032.6475 | 1032.5465 | 97.9   | 544   | -   | 552  | 1 --- | R.GSPVRQSF.R.K                              |
| 1131.6659 | 1130.6586 | 1130.6183 | 35.7   | 810   | -   | 819  | 0 --- | K.QLGETLTTELK.A                             |
| 1300.7965 | 1299.7892 | 1299.6783 | 85.4   | 1151  | -   | 1163 | 1 --- | R.LKTAQQGAGSPDK.G                           |
| 1408.5692 | 1407.5619 | 1407.6664 | -74.20 | 943   | -   | 955  | 1 --- | R.SMDKAVSVEAAER.D + Oxidation (M)           |
| 1408.5692 | 1407.5619 | 1407.6664 | -74.19 | 943   | -   | 955  | 1 --- | R.SMDKAVSVEAAER.D + Oxidation (M)           |
| 1427.7416 | 1426.7343 | 1426.7780 | -30.58 | 272   | -   | 284  | 1 --- | K.SPNTAILIKDEAR.N                           |
| 1457.6237 | 1456.6164 | 1456.6735 | -39.21 | 497   | -   | 511  | 0 --- | K.AAGGGPLYGDGYGFR.L                         |
| 1775.7623 | 1774.7550 | 1774.7904 | -19.94 | 643   | -   | 661  | 0 --- | K.IEGSNGAATPSAPCGSGSR.S                     |
| 2305.0723 | 2304.0650 | 2304.2181 | -66.43 | 612   | -   | 632  | 1 --- | R.MEAMEKQIASLTGLVQSALLR.G + Oxidation (M)   |
| 2321.0693 | 2320.0620 | 2320.2130 | -65.08 | 612   | -   | 632  | 1 --- | R.MEAMEKQIASLTGLVQSALLR.G + 2 Oxidation (M) |
| 2459.1550 | 2458.1477 | 2458.1169 | 12.5   | 1120  | -   | 1142 | 1 --- | K.DEDDEDRIIAELESGGGSGVPPMK.V                |

**No match to:** 811.4696, 842.4688, 848.4903, 850.0149, 850.5021, 856.4824, 865.9890, 868.5110, 870.5007, 876.9973, 882.5262, 882.5263, 892.9677, 951.5844, 996.5507, 1017.6264, 1017.6264, 1045.5144, 1045.5144, 1051.6622, 1051.6622, 1133.6655, 1147.6840, 1151.6809, 1165.6895, 1165.6895, 1179.5537, 1236.6508, 1302.8025, 1307.6320, 1316.8201, 1334.8311, 1334.8311, 1430.5653, 1448.8605, 1448.8605, 1475.6832, 1617.9929, 1617.9929, 1732.0273, 1901.1764, 1940.8547, 1993.8938, 2056.9478, 2193.0378, 2211.0134, 2221.0344, 2225.0469, 2230.1272, 2233.0085, 2239.0554, 2248.9812, 2261.0361, 2265.0583, 2283.0833, 2470.2014, 2477.1138, 2477.1138, 2492.1714, 2499.1167, 3337.7234

## Search Parameters

Type of search : Sequence Query  
 Enzyme : Trypsin  
 Fixed modifications : [Carbamidomethyl \(C\)](#)  
 Variable modifications : [Oxidation \(M\)](#)  
 Mass values : Monoisotopic  
 Protein Mass : Unrestricted  
 Peptide Mass Tolerance :  $\pm 100$  ppm  
 Fragment Mass Tolerance :  $\pm 0.3$  Da  
 Max Missed Cleavages : 1  
 Instrument type : MALDI-TOF-TOF  
 Query1 (811.4696,+): <no title>  
 Query2 (842.4688,+): <no title>  
 Query3 (848.4903,+): <no title>



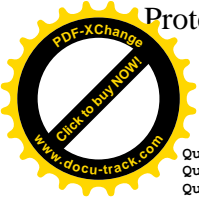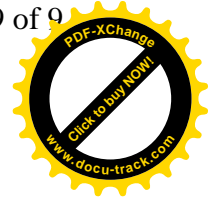

Query4 (850.0149,1+): <no title>  
Query5 (850.5021,1+): <no title>  
Query6 (853.4834,1+): <no title>  
Query7 (856.4824,1+): <no title>  
Query8 (864.4868,1+): <no title>  
Query9 (865.9890,1+): <no title>  
Query10 (868.5110,1+): <no title>  
Query11 (870.5007,1+): <no title>  
Query12 (876.9973,1+): <no title>  
Query13 (882.5262,1+): <no title>  
Query14 (882.5263,1+): Locus:1..14.0.2  
Query15 (892.9677,1+): <no title>  
Query16 (951.5844,1+): <no title>  
Query17 (953.5057,1+): <no title>  
Query18 (996.5507,1+): <no title>  
Query19 (1017.6264,1+): <no title>  
Query20 (1017.6264,1+): Locus:1..14.0.8  
Query21 (1033.6548,1+): Locus:1..14.0.10  
Query22 (1033.6548,1+): <no title>  
Query23 (1045.5144,1+): <no title>  
Query24 (1045.5144,1+): Locus:1..14.0.5  
Query25 (1051.6622,1+): <no title>  
Query26 (1051.6622,1+): Locus:1..14.0.3  
Query27 (1131.6659,1+): <no title>  
Query28 (1133.6655,1+): <no title>  
Query29 (1147.6840,1+): <no title>  
Query30 (1151.6809,1+): <no title>  
Query31 (1165.6895,1+): Locus:1..14.0.4  
Query32 (1165.6895,1+): <no title>  
Query33 (1179.5537,1+): <no title>  
Query34 (1236.6508,1+): <no title>  
Query35 (1300.7965,1+): <no title>  
Query36 (1302.8025,1+): <no title>  
Query37 (1307.6320,1+): <no title>  
Query38 (1316.8201,1+): <no title>  
Query39 (1334.8311,1+): Locus:1..14.0.7  
Query40 (1334.8311,1+): <no title>  
Query41 (1408.5692,1+): <no title>  
Query42 (1408.5692,1+): Locus:1..14.0.9  
Query43 (1427.7416,1+): <no title>  
Query44 (1430.5653,1+): <no title>  
Query45 (1448.8605,1+): Locus:1..14.0.11  
Query46 (1448.8605,1+): <no title>  
Query47 (1457.6237,1+): <no title>  
Query48 (1475.6832,1+): <no title>  
Query49 (1617.9929,1+): <no title>  
Query50 (1617.9929,1+): Locus:1..14.0.6  
Query51 (1732.0273,1+): <no title>  
Query52 (1775.7623,1+): <no title>  
Query53 (1901.1764,1+): <no title>  
Query54 (1940.8547,1+): <no title>  
Query55 (1993.8938,1+): <no title>  
Query56 (2056.9478,1+): <no title>  
Query57 (2193.0378,1+): <no title>  
Query58 (2211.0134,1+): <no title>  
Query59 (2221.0344,1+): <no title>  
Query60 (2225.0469,1+): <no title>  
Query61 (2230.1272,1+): <no title>  
Query62 (2233.0085,1+): <no title>  
Query63 (2239.0554,1+): <no title>  
Query64 (2248.9812,1+): <no title>  
Query65 (2261.0361,1+): <no title>  
Query66 (2265.0583,1+): <no title>  
Query67 (2283.0833,1+): <no title>  
Query68 (2305.0723,1+): <no title>  
Query69 (2321.0693,1+): <no title>  
Query70 (2459.1550,1+): <no title>  
Query71 (2470.2014,1+): <no title>  
Query72 (2477.1138,1+): Locus:1..14.0.1  
Query73 (2477.1138,1+): <no title>  
Query74 (2492.1714,1+): <no title>  
Query75 (2499.1167,1+): <no title>  
Query76 (3337.7234,1+): <no title>

Mascot: <http://www.matrixscience.com/>
