# Supplementary material for: Alpha-2-Macroglobulin as a New Promising Biomarker Improving the Diagnostic Sensitivity of Bovine Paratuberculosis
Source: Frontiers journal article supplement (doi:10.3389/fvets.2021.637716), 2021-03-05
Supplement: Data_Sheet_1.zip [file Data_Sheet_1.zip]

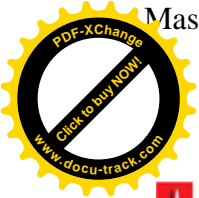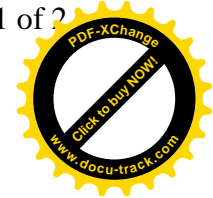

# MASCOT Search Results

## Protein View: A0A1R3UGP4

Kallikrein G OS=Bos taurus OX=9913 GN=KLNG PE=3 SV=1

Database: Uniprot\_bovine  
Score: 66  
Expect: 0.034  
Nominal mass ( $M_r$ ): 28249  
Calculated pI: 9.07

Sequence similarity is available as [an NCBI BLAST search of A0A1R3UGP4 against nr.](#)

### Search parameters

Enzyme: Trypsin: cuts C-term side of KR unless next residue is P.  
Fixed modifications: [Carbamidomethyl \(C\)](#)  
Variable modifications: [Oxidation \(M\)](#)

Protein sequence coverage: 42%

Matched peptides shown in **bold red**.

1 **MMTLQLIMFA** **LVTGHVGGET** **RIIK**GYECP HSQPWQAALF QK**TRLLCGAT**  
51 **LIAPRWLLTA** AHCRKPR**YVV** **HLGAHSLGRQ** **DGCEQTRTAT** **KSFPHPDFNN**  
101 **SLPNKDHRND** **IMLVKMVTPA** HLTWAVRPLT VSPRCVPAGA NCLISGWGTM  
151 SSPQLHLPHT LRC**CANVTIIK** **HRECE**DAYPG NITDTMVCAS VRKEGKDSCQ  
201 GDSGGPLVCN GSLQGIISWG QDPCAVSK**KP** **GVYTKVCKYV** **DWIK**TMENN

Unformatted sequence string: [250 residues](#) (for pasting into other applications).

Sort peptides by      Residue Number      Increasing Mass      Decreasing Mass

Show predicted peptides also

| Query              | Start - End | Observed  | Mr(expt)  | Mr(calc)  | ppm   | M | Score | Peptide                                                    |
|--------------------|-------------|-----------|-----------|-----------|-------|---|-------|------------------------------------------------------------|
| <a href="#">75</a> | 1 - 21      | 2305.0740 | 2304.0667 | 2304.1793 | -48.8 | 0 |       | <b>-.MMTLQLIMFALVTGHVGGETR.I</b>                           |
| <a href="#">76</a> | 1 - 21      | 2321.0552 | 2320.0479 | 2320.1742 | -54.4 | 0 |       | <b>-.MMTLQLIMFALVTGHVGGETR.I</b><br><b>+ Oxidation (M)</b> |
| <a href="#">77</a> | 2 - 24      | 2528.2617 | 2527.2544 | 2527.4019 | -58.3 | 1 |       | <b>M.MTLQLIMFALVTGHVGGETRIK.G</b>                          |
| <a href="#">45</a> | 45 - 55     | 1184.6520 | 1183.6447 | 1183.6747 | -25.3 | 0 |       | <b>R.LLCGATLIAPR.W</b>                                     |
| <a href="#">74</a> | 68 - 87     | 2283.0847 | 2282.0774 | 2282.0975 | -8.78 | 1 |       | <b>R.YVVHLGAHSLGRQDGCEQTR.T</b>                            |
| <a href="#">72</a> | 88 - 105    | 2015.1949 | 2014.1876 | 2013.9908 | 97.7  | 1 |       | <b>R.TATKSFPHPDFNNSLPNK.D</b>                              |
| <a href="#">6</a>  | 109 - 115   | 848.4780  | 847.4707  | 847.4473  | 27.6  | 0 |       | <b>R.NDIMLVK.M + Oxidation (M)</b>                         |
| <a href="#">52</a> | 163 - 172   | 1211.6572 | 1210.6499 | 1210.6604 | -8.69 | 1 |       | <b>R.CANVTIIKHR.E</b>                                      |
| <a href="#">44</a> | 229 - 238   | 1179.5499 | 1178.5426 | 1178.6482 | -89.5 | 1 |       | <b>K.KPGVYTKVCK.Y</b>                                      |
| <a href="#">25</a> | 239 - 245   | 951.5720  | 950.5647  | 950.4862  | 82.7  | 0 |       | <b>K.YVDWIK.T</b>                                          |

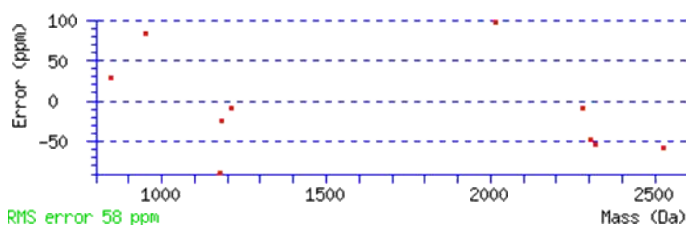

ID A0A1R3UGP4\_BOVIN      Unreviewed;      250 AA.  
AC A0A1R3UGP4;  
DT 12-APR-2017, integrated into UniProtKB/TrEMBL.  
DT 12-APR-2017, sequence version 1.  
DT 11-DEC-2019, entry version 7.  
DE SubName: Full=Kallikrein G {ECO:0000313|EMBL:SFW93292.1};  
GN Name=KLNG {ECO:0000313|EMBL:SFW93292.1};  
OS Bos taurus (Bovine).  
OC Eukaryota; Metazoa; Chordata; Craniata; Vertebrata; Euteleostomi; Mammalia;  
OC Eutheria; Laurasiatheria; Artiodactyla; Ruminantia; Pecora; Bovidae;

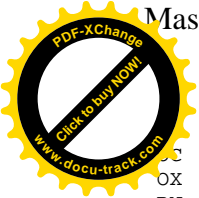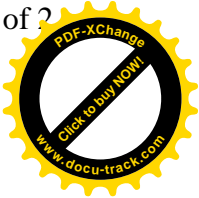

OX NCBI\_TaxID=9913 {ECO:0000313|EMBL:SFW93292.1};  
RN [1] {ECO:0000313|EMBL:SFW93292.1}  
RP NUCLEOTIDE SEQUENCE.  
RX PubMed=28224083; DOI=10.1016/j.ymgmr.2017.01.009;  
RA Premzl M.;  
RT "Comparative genomic analysis of eutherian kallikrein genes.";  
RL Mol. Genet. Metab. Rep. 10:96-99(2017).  
RN [2] {ECO:0000313|EMBL:SFW93292.1}  
RP NUCLEOTIDE SEQUENCE.  
RX DOI=10.1016/j.genrep.2019.100414;  
RA Premzl M.;  
RT "Eutherian third-party data gene collections.";  
RL Gene Rep 16:0-0(2019).  
CC -!- SIMILARITY: Belongs to the peptidase S1 family.  
CC {ECO:0000256|SAAS:SAAS00559343}.  
CC -----  
CC Copyrighted by the UniProt Consortium, see <https://www.uniprot.org/terms>  
CC Distributed under the Creative Commons Attribution (CC BY 4.0) License  
CC -----  
DR EMBL; LT631645; SFW93292.1; -; Genomic\_DNA.  
DR RefSeq; XP\_010813547.1; XM\_010815245.2.  
DR RefSeq; XP\_010822145.1; XM\_010823843.2.  
DR GeneID; 526737; -.  
DR CTD; 11012; -.  
DR GO; GO:0004252; F:serine-type endopeptidase activity; IEA:InterPro.  
DR CDD; cd00190; Tryp\_Spc; 1.  
DR InterPro; IPR009003; Peptidase\_S1\_PA.  
DR InterPro; IPR001314; Peptidase\_S1A.  
DR InterPro; IPR001254; Trypsin\_dom.  
DR InterPro; IPR018114; TRYPSIN\_HIS.  
DR InterPro; IPR033116; TRYPSIN\_SER.  
DR Pfam; PF00089; Trypsin; 1.  
DR PRINTS; PR00722; CHYMOTRYPSIN.  
DR SMART; SM00020; Tryp\_Spc; 1.  
DR SUPFAM; SSF50494; SSF50494; 1.  
DR PROSITE; PS50240; TRYPSIN\_DOM; 1.  
DR PROSITE; PS00134; TRYPSIN\_HIS; 1.  
DR PROSITE; PS00135; TRYPSIN\_SER; 1.  
PE 3: Inferred from homology;  
KW Disulfide bond {ECO:0000256|SAAS:SAAS00037407};  
KW Hydrolase {ECO:0000256|RuleBase:RU363034};  
KW Protease {ECO:0000256|RuleBase:RU363034};  
KW Serine protease {ECO:0000256|RuleBase:RU363034};  
KW Signal {ECO:0000256|SAM:SignalP}.  
FT SIGNAL 1..18  
FT /evidence="ECO:0000256|SAM:SignalP"  
FT CHAIN 19..250  
FT /evidence="ECO:0000256|SAM:SignalP"  
FT /id="PRO\_5010232748"  
FT DOMAIN 22..248  
FT /note="Peptidase S1"  
FT /evidence="ECO:0000259|PROSITE:PS50240"  
SQ SEQUENCE 250 AA; 27526 MW; FC0A1E17DA0325D1 CRC64;  
MMTLQLIMFA LVTGHVGGET RIIKGYECP HSQPWQAALF QKTRLLCGAT LIAPRWLLTA  
AHCRCPRYVV HLGASLGRQ DGCEQTRTAT KSFPHPDFNN SLPNKDHRND IMLVKMVTPTA  
HLTWA VRPLT VSPRCVPAGA NCLISGWGT SSPQLHLPHT LRCANVTIHK HRECEAYPG  
NITDTMYCAS VRKEGKDSCQ GDSGGPLVCN GSLQGIISWG QDPCAVSKKP GVTYTKVCKYV  
DWIQKTMENN

//

Mascot: <http://www.matrixscience.com/>
