# Supplementary material for: Alpha-2-Macroglobulin as a New Promising Biomarker Improving the Diagnostic Sensitivity of Bovine Paratuberculosis
Source: Frontiers journal article supplement (doi:10.3389/fvets.2021.637716), 2021-03-05
Supplement: Data_Sheet_1.zip [file Data_Sheet_1.zip]

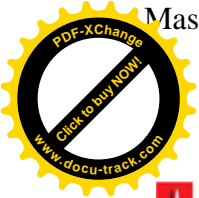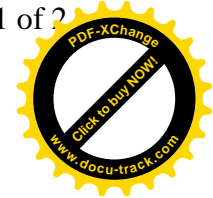

# MASCOT Search Results

## Protein View: A0A3Q1M3L6

Uncharacterized protein OS=Bos taurus OX=9913 PE=1 SV=1

Database: Uniprot\_bovine  
Score: 82  
Expect: 0.00079  
Nominal mass ( $M_r$ ): 41077  
Calculated pI: 5.16

Sequence similarity is available as [an NCBI BLAST search of A0A3Q1M3L6 against nr.](#)

### Search parameters

Enzyme: Trypsin: cuts C-term side of KR unless next residue is P.  
Fixed modifications: [Carbamidomethyl \(C\)](#)  
Variable modifications: [Oxidation \(M\)](#)

Protein sequence coverage: 26%

Matched peptides shown in **bold red**.

1 MPEPVTVTWN SGALKSGVHT FPAVLQSSGL YSLSSMVTVP ASSSGQTFTC  
51 NVAHPASSTK VDKAVDPTCK PSPCDCCPPP ELPGGPSVFI FPPKPKDTLT  
101 ISGTPEVTCV VVDVGHDDPE **VKFSWFVDDV EVNTATTKPR** EEQFNSTYRV  
151 VSALR**IQHQD WTGGKEFKCK VHNEGLPAPI VRTISRTKGP AREPQVYVLA**  
201 **PPQEELSKST VSLTCMVTSF YPDYIAVEWQ** RRGQPESEDK YGTTTPQLDA  
251 DSSYFLYSKL RVDNRNSWQEG DTYTCVVMHE ALHNHYTQKS TSKSADLLE  
301 EEICADAQDG ELDGLWTTIS IFITLFLLSV CYSATVTLFK **VKWIFSSVVE**  
351 **LKRTIVPDYR** NMIGQGA

Unformatted sequence string: [367 residues](#) (for pasting into other applications).

Sort peptides by      Residue Number      Increasing Mass      Decreasing Mass

Show predicted peptides also

| Query              | Start - End | Observed  | Mr(expt)  | Mr(calc)  | ppm   | M | Score | Peptide                            |
|--------------------|-------------|-----------|-----------|-----------|-------|---|-------|------------------------------------|
| <a href="#">65</a> | 123 - 140   | 2111.9341 | 2110.9268 | 2111.0324 | -50.0 | 0 | 46    | <b>K.FSWFVDDVEVNTATTKPR.E</b>      |
| <a href="#">66</a> | 123 - 140   | 2111.9341 | 2110.9268 | 2111.0324 | -50.0 | 0 |       | <b>K.FSWFVDDVEVNTATTKPR.E</b>      |
| <a href="#">32</a> | 156 - 165   | 1169.5049 | 1168.4976 | 1168.5625 | -55.5 | 0 |       | <b>R.IQHQDWTGGK.E</b>              |
| <a href="#">35</a> | 171 - 182   | 1301.6583 | 1300.6510 | 1300.7252 | -57.0 | 0 |       | <b>K.VHNEGLPAPIVR.T</b>            |
| <a href="#">36</a> | 171 - 182   | 1301.6583 | 1300.6511 | 1300.7252 | -57.0 | 0 |       | <b>K.VHNEGLPAPIVR.T</b>            |
| <a href="#">55</a> | 193 - 208   | 1826.8557 | 1825.8484 | 1825.9462 | -53.5 | 0 |       | <b>R.EPQVYVLAPPQEELSK.S</b>        |
| <a href="#">75</a> | 209 - 231   | 2753.2139 | 2752.2066 | 2752.2877 | -29.5 | 0 |       | <b>K.STVSLTCMVTSFYPDYIAVEWQR.N</b> |
| <a href="#">39</a> | 343 - 353   | 1363.6659 | 1362.6586 | 1362.7660 | -78.8 | 1 |       | <b>K.WIFSSVELKR.T</b>              |
| <a href="#">22</a> | 353 - 360   | 1019.6312 | 1018.6239 | 1018.5560 | 66.7  | 1 |       | <b>K.RTIVPDYR.N</b>                |

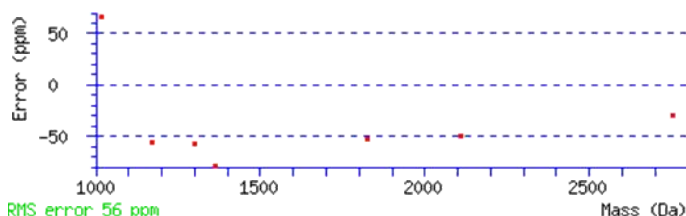

ID A0A3Q1M3L6\_BOVIN      Unreviewed;      367 AA.  
AC A0A3Q1M3L6;  
DT 10-APR-2019, integrated into UniProtKB/TrEMBL.  
DT 10-APR-2019, sequence version 1.  
DT 11-DEC-2019, entry version 5.  
DE SubName: Full=Uncharacterized protein {ECO:0000313|Ensembl:ENSBTAP00000064749};  
OS Bos taurus (Bovine).  
OC Eukaryota; Metazoa; Chordata; Craniata; Vertebrata; Euteleostomi; Mammalia;

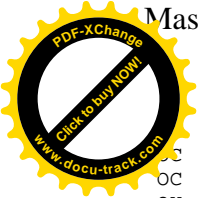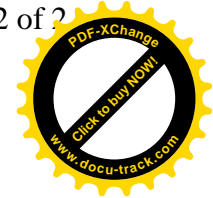

OC Eutheria; Laurasiatheria; Artiodactyla; Ruminantia; Pecora; Bovidae;  
 OC Bovinae; Bos.  
 OX NCBI\_TaxID=9913 {ECO:0000313|Ensembl:ENSBTAP00000064749, ECO:0000313|Proteomes:UP000009136};  
 RN [1] {ECO:0000313|Ensembl:ENSBTAP00000064749, ECO:0000313|Proteomes:UP000009136}  
 RP NUCLEOTIDE SEQUENCE [LARGE SCALE GENOMIC DNA].  
 RC STRAIN=Hereford {ECO:0000313|Ensembl:ENSBTAP00000064749,  
 RC ECO:0000313|Proteomes:UP000009136};  
 RA Rosen B.D., Bickhart D.M., Koren S., Schnabel R.D., Hall R., Zimin A.,  
 RA Dreischoer C., Schultheiss S., Schroeder S.G., Elsik C.G., Couldrey C.,  
 RA Liu G.E., Van Tassell C.P., Phillippy A.M., Smith T.P.L., Medrano J.F.;  
 RT "ARS-UCD1.2.";  
 RL Submitted (MAR-2018) to the EMBL/GenBank/DDBJ databases.  
 RN [2] {ECO:0000313|Ensembl:ENSBTAP00000064749}  
 RP IDENTIFICATION.  
 RC STRAIN=Hereford {ECO:0000313|Ensembl:ENSBTAP00000064749};  
 RG Ensembl;  
 RL Submitted (JAN-2019) to UniProtKB.  
 CC -----  
 CC Copyrighted by the UniProt Consortium, see <https://www.uniprot.org/terms>  
 CC Distributed under the Creative Commons Attribution (CC BY 4.0) License  
 CC -----  
 DR Ensembl; ENSBTAT00000083559; ENSBTAP00000064749; ENSBTAG00000055240.  
 DR GeneTree; ENSGT00940000162793; -.  
 DR Proteomes; UP000009136; Chromosome 20.  
 DR GO; GO:0016021; C:integral component of membrane; IEA:UniProtKB-KW.  
 DR Gene3D; 2.60.40.10; -; 3.  
 DR InterPro; IPR007110; Ig-like\_dom.  
 DR InterPro; IPR036179; Ig-like\_dom\_sf.  
 DR InterPro; IPR013783; Ig-like\_fold.  
 DR InterPro; IPR003006; Ig/MHC\_CS.  
 DR InterPro; IPR003597; Ig\_C1-set.  
 DR Pfam; PF07654; C1-set; 3.  
 DR SMART; SM00407; IGc1; 3.  
 DR SUPFAM; SSF48726; SSF48726; 3.  
 DR PROSITE; PS50835; IG\_LIKE; 3.  
 DR PROSITE; PS00290; IG\_MHC; 2.  
 PE 1: Evidence at protein level;  
 KW Immunoglobulin domain {ECO:0000256|SAAS:SAAS00653601};  
 KW Membrane {ECO:0000256|SAM:Phobius};  
 KW Proteomics identification {ECO:0000213|PeptideAtlas:A0A3Q1M3L6};  
 KW Reference proteome {ECO:0000313|Proteomes:UP000009136};  
 KW Transmembrane {ECO:0000256|SAM:Phobius};  
 KW Transmembrane helix {ECO:0000256|SAM:Phobius}.  
 FT TRANSMEM 314..339  
 FT /note="Helical"  
 FT /evidence="ECO:0000256|SAM:Phobius"  
 FT DOMAIN 1..66  
 FT /note="Ig-like"  
 FT /evidence="ECO:0000259|PROSITE:PS50835"  
 FT DOMAIN 86..185  
 FT /note="Ig-like"  
 FT /evidence="ECO:0000259|PROSITE:PS50835"  
 FT DOMAIN 194..292  
 FT /note="Ig-like"  
 FT /evidence="ECO:0000259|PROSITE:PS50835"  
 SQ SEQUENCE 367 AA; 40476 MW; AF804286143DA888 CRC64;  
 MPEPVTVTWN SGALKSGVHT FPAVLQSSGL YSLSSMVTVP ASSSGQTFTC NVAHPASSTK  
 VDKAVDPTCK BSPDCDCPPP ELPGGPSVFI FPPKPKDILT ISGTPEVTCV VVDVGHDDPE  
 VKFSWFVDDV EVNTATTKPR EEQFNSTYRV VSALRIQHOD WTGGKEFKCK VHNEGLPAPI  
 VRTISRKGP AREPQVYVLA PPQEELSKST VSLTCMVSF YPDYIAVEWQ RNGQPESSEK  
 YGTTTPQLDA DSSYFLYSLK RVDNRNSWQEG DTYTCVVMHE ALHNHYTQKS TSKSADLLE  
 EEICADAQDG ELDGLWTTIS IFITLFLLSV CYSATVTLEK VKWIFSSVVE LKRTIVPDYR  
 NMIGQGA  
 //

Mascot: <http://www.matrixscience.com/>
