# Supplementary material for: Alpha-2-Macroglobulin as a New Promising Biomarker Improving the Diagnostic Sensitivity of Bovine Paratuberculosis
Source: Frontiers journal article supplement (doi:10.3389/fvets.2021.637716), 2021-03-05
Supplement: Data_Sheet_1.zip [file Data_Sheet_1.zip]

Matrix  
SCIENCE

Mascot Search Results

User :  
Email :  
Search title : BAEDW\2019\_10\_16\2019\_10\_16\MSMS 5\C13  
Database : NCBIInr 20131104 (33815671 sequences; 11795550776 residues)  
Timestamp : 15 Oct 2019 at 09:37:24 GMT  
Warning : A Peptide summary report will usually give a much clearer picture of MS/MS search results.  
Top Score : 151 for gi|7547266, IgG1 heavy chain constant region [Bos taurus]

Mascot Score Histogram

Protein score is -10\*Log(P), where P is the probability that the observed match is a random event.  
Protein scores greater than 88 are significant (p<0.05).  
Protein scores are derived from ions scores as a non-probabilistic basis for ranking protein hits.

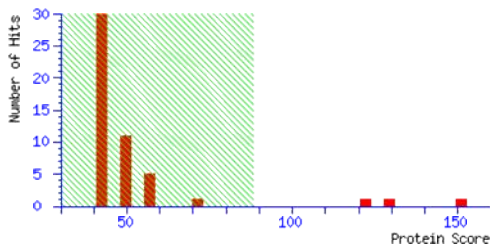

Protein Summary Report

Format As

Protein Summary (deprecated)

Help

Significance threshold p< 0.05 Max. number of hits 50

Re-Search All

Search Unmatched

Index

| Accession                        | Mass  | Score | Description                                                                                      |
|----------------------------------|-------|-------|--------------------------------------------------------------------------------------------------|
| 1. <a href="#">gi 7547266</a>    | 36510 | 151   | IgG1 heavy chain constant region [Bos taurus]                                                    |
| 2. <a href="#">gi 440891567</a>  | 11475 | 129   | Ig gamma-1 chain C region, partial [Bos grunniens mutus]                                         |
| 3. <a href="#">gi 108750</a>     | 51391 | 121   | Ig heavy chain precursor (B/MT.4A.17.H5.A5) - bovine                                             |
| 4. <a href="#">gi 91982959</a>   | 36562 | 71    | immunoglobulin gamma 1 heavy chain constant region [Bos taurus]                                  |
| 5. <a href="#">gi 498046415</a>  | 7331  | 56    | hypothetical protein [Neisseria gonorrhoeae]                                                     |
| 6. <a href="#">gi 337290484</a>  | 15574 | 56    | hypothetical protein CULC22_00873 [Corynebacterium ulcerans BR-AD22]                             |
| 7. <a href="#">gi 546357233</a>  | 26141 | 55    | putative uncharacterized protein [Blautia hydrogenotrophica CAG:147]                             |
| 8. <a href="#">gi 489983378</a>  | 9455  | 54    | hypothetical protein [Mycobacterium phlei]                                                       |
| 9. <a href="#">gi 490762382</a>  | 56174 | 54    | Endoglucanase [Clostridium termitidis]                                                           |
| 10. <a href="#">gi 518548361</a> | 35653 | 53    | LysR family transcriptional regulator [Ralstonia solanacearum]                                   |
| 11. <a href="#">gi 327305893</a> | 11598 | 52    | hypothetical protein TERG_02355 [Trichophyton rubrum CBS 118892]                                 |
| 12. <a href="#">gi 171688784</a> | 30526 | 50    | hypothetical protein [Podospira anserina S mat+]                                                 |
| 13. <a href="#">gi 495323294</a> | 9800  | 50    | hypothetical protein [Reinekea blandensis]                                                       |
| 14. <a href="#">gi 255291985</a> | 7225  | 50    | hypothetical protein [uncultured bacterium]                                                      |
| 15. <a href="#">gi 492883710</a> | 4310  | 50    | hypothetical protein [Afipia broomeae]                                                           |
| 16. <a href="#">gi 551336008</a> | 5799  | 49    | hypothetical protein [Perlucidibaca piscinae]                                                    |
| 17. <a href="#">gi 495360281</a> | 22699 | 48    | hypothetical protein [Pseudomonas sp. GM80]                                                      |
| 18. <a href="#">gi 487598108</a> | 4479  | 48    | propanediol utilization ferredoxin, partial [Salmonella enterica]                                |
| 19. <a href="#">gi 401763462</a> | 16967 | 48    | hypothetical protein ECENHK_09860 [Enterobacter cloacae subsp. cloacae ENHKU01]                  |
| 20. <a href="#">gi 553884411</a> | 20219 | 47    | integrase [Gloeobacter sp. JS]                                                                   |
| 21. <a href="#">gi 497783917</a> | 30566 | 46    | Beta-lactamase, partial [Burkholderia ubonensis]                                                 |
| 22. <a href="#">gi 150377816</a> | 75741 | 46    | mechanosensitive ion channel MscS [Sinorhizobium medicae WSM419]                                 |
| 23. <a href="#">gi 332024455</a> | 50459 | 46    | Dual specificity protein phosphatase 22 [Acromyrmex echinatio]                                   |
| 24. <a href="#">gi 489455877</a> | 40956 | 45    | thiouridylase [Clostridium botulinum]                                                            |
| 25. <a href="#">gi 486622113</a> | 3493  | 45    | hypothetical protein [Escherichia coli]                                                          |
| 26. <a href="#">gi 546373423</a> | 5165  | 45    | hypothetical protein [Prevotella sp. CAG:1058]                                                   |
| 27. <a href="#">gi 495396594</a> | 25331 | 45    | peptide ABC transporter ATP-binding protein [[Bacteroides] pectinophilus]                        |
| 28. <a href="#">gi 517950378</a> | 44454 | 44    | hypothetical protein [Brevibacillus sp. pH8]                                                     |
| 29. <a href="#">gi 493698297</a> | 5437  | 44    | hypothetical protein [Haloterrigena thermotolerans]                                              |
| 30. <a href="#">gi 163839610</a> | 17902 | 44    | nucleotide-binding protein [Renibacterium salmoninarum ATCC 33209]                               |
| 31. <a href="#">gi 548180461</a> | 10887 | 44    | uncharacterized protein [Bacteroides uniformis CAG:3]                                            |
| 32. <a href="#">gi 339499150</a> | 28813 | 44    | short-chain dehydrogenase/reductase SDR [Treponema caldaria DSM 7334]                            |
| 33. <a href="#">gi 522141702</a> | 27885 | 44    | hypothetical protein [Massilia niastensis]                                                       |
| 34. <a href="#">gi 497966698</a> | 29777 | 44    | peptide ABC transporter ATP-binding protein [Streptomyces sp. SA3_actF]                          |
| 35. <a href="#">gi 547298347</a> | 24974 | 43    | lipoprotein ABC transporter ATP-binding protein Lold [Clostridium hathewayi CAG:224]             |
| 36. <a href="#">gi 496545606</a> | 25186 | 43    | peptide ABC transporter ATP-binding protein [Lachnospiraceae bacterium 3_1_57FAA_CT1]            |
| 37. <a href="#">gi 479202615</a> | 25300 | 43    | ABC-type antimicrobial peptide transport system, ATPase component [Roseburia intestinalis M50/1] |
| 38. <a href="#">gi 296132158</a> | 47550 | 43    | respiratory-chain NADH dehydrogenase domain 51 kDa subunit [Thermincola potens JR]               |
| 39. <a href="#">gi 494243326</a> | 26715 | 43    | short-chain dehydrogenase [Methylophaga aminisulfidivorans]                                      |
| 40. <a href="#">gi 491299814</a> | 25459 | 43    | hypothetical protein [Amycolatopsis azurea]                                                      |
| 41. <a href="#">gi 312112921</a> | 46524 | 43    | lytic murein transglycosylase [Rhodocrobium vannielii ATCC 17100]                                |
| 42. <a href="#">gi 396482791</a> | 59448 | 43    | predicted protein [Leptosphaeria maculans JN3]                                                   |
| 43. <a href="#">gi 550962788</a> | 10224 | 43    | hypothetical protein [Pseudochrobactrum sp. A018b]                                               |
| 44. <a href="#">gi 297182578</a> | 12830 | 43    | transposase and inactivated derivatives [uncultured Rhizobiales bacterium HF4000_32B18]          |
| 45. <a href="#">gi 341890310</a> | 11784 | 43    | hypothetical protein CAEBREN_08480 [Caenorhabditis brenneri]                                     |
| 46. <a href="#">gi 123189376</a> | 27775 | 43    | hypothetical protein [Trichomonas vaginalis G3]                                                  |
| 47. <a href="#">gi 493826333</a> | 24992 | 42    | peptide ABC transporter ATP-binding protein [Clostridium hathewayi]                              |
| 48. <a href="#">gi 332235189</a> | 5332  | 42    | PREDICTED: protein phosphatase 1 regulatory subunit 14D [Nomascus leucogenys]                    |
| 49. <a href="#">gi 520945468</a> | 15697 | 42    | LysR family transcriptional regulator, partial [Pseudomonas syringae]                            |
| 50. <a href="#">gi 486208296</a> | 4883  | 42    | hypothetical protein [Escherichia coli]                                                          |

Results List

[gi|7547266](#) Mass: 36510 Score: 151 Expect: 2.7e-008 Matches: 10

IgG1 heavy chain constant region [Bos taurus]

| Observed  | Mr(expt)  | Mr(calc)  | ppm  | Start | End | Miss | Ions | Peptide                     |
|-----------|-----------|-----------|------|-------|-----|------|------|-----------------------------|
| 1169.6356 | 1168.6283 | 1168.5625 | 56.3 | 188   | 197 | 0    | ---  | R.IQHQQDWTGGK.E             |
| 1169.6356 | 1168.6283 | 1168.5625 | 56.3 | 188   | 197 | 0    | ---  | R.IQHQQDWTGGK.E             |
| 1301.8031 | 1300.7958 | 1300.7252 | 54.3 | 203   | 214 | 0    | ---  | K.VHNEGLPAPIVR.T            |
| 1301.8031 | 1300.7958 | 1300.7252 | 54.3 | 203   | 214 | 0    | 51   | K.VHNEGLPAPIVR.T            |
| 2112.1482 | 2111.1409 | 2111.0324 | 51.4 | 155   | 172 | 0    | 46   | K.FSWFVDDVEVNTATTKPR.E      |
| 2112.1482 | 2111.1409 | 2111.0324 | 51.4 | 155   | 172 | 0    | ---  | K.FSWFVDDVEVNTATTKPR.E      |
| 2151.1111 | 2150.1038 | 2149.9957 | 50.3 | 273   | 291 | 0    | 13   | K.YGTTPPQLDADGSYFLYSR.L     |
| 2151.1111 | 2150.1038 | 2149.9957 | 50.3 | 273   | 291 | 0    | ---  | K.YGTTPPQLDADGSYFLYSR.L     |
| 2753.4365 | 2752.4292 | 2752.2877 | 51.4 | 241   | 263 | 0    | ---  | K.STVSLTCMVTSFYPDYIAVEWQR.N |
| 2753.4365 | 2752.4292 | 2752.2877 | 51.4 | 241   | 263 | 0    | ---  | K.STVSLTCMVTSFYPDYIAVEWQR.N |

No match to: 841.1960, 841.1960, 842.5637, 855.0995, 871.0715, 882.6186, 882.6186, 893.0596, 909.0323, 915.1290, 915.1290, 927.5462, 947.0018, 1051.7703, 1060.1125, 1060.1126, 1083.1046, 1313.8103, 1313.8103, 1325.8025, 1339.7694, 1674.8976, 1874.0144, 2005.0609, 2124.1565, 2124.1565, 2212.2224

2. [gi|440891567](#) Mass: 11475 Score: 129 Expect: 4.3e-006 Matches: 6

Ig gamma-1 chain C region, partial [Bos grunniens mutus]

| Observed  | Mr(expt)  | Mr(calc)  | ppm  | Start | End | Miss | Ions | Peptide                |
|-----------|-----------|-----------|------|-------|-----|------|------|------------------------|
| 1169.6356 | 1168.6283 | 1168.5625 | 56.3 | 71    | 80  | 0    | ---  | R.IQHQQDWTGGK.E        |
| 1169.6356 | 1168.6283 | 1168.5625 | 56.3 | 71    | 80  | 0    | ---  | R.IQHQQDWTGGK.E        |
| 1301.8031 | 1300.7958 | 1300.7252 | 54.3 | 86    | 97  | 0    | ---  | K.VHNEGLPAPIVR.T       |
| 1301.8031 | 1300.7958 | 1300.7252 | 54.3 | 86    | 97  | 0    | 51   | K.VHNEGLPAPIVR.T       |
| 2112.1482 | 2111.1409 | 2111.0324 | 51.4 | 38    | 55  | 0    | 46   | K.FSWFVDDVEVNTATTKPR.E |
| 2112.1482 | 2111.1409 | 2111.0324 | 51.4 | 38    | 55  | 0    | ---  | K.FSWFVDDVEVNTATTKPR.E |

No match to: 841.1960, 841.1960, 842.5637, 855.0995, 871.0715, 882.6186, 882.6186, 893.0596, 909.0323, 915.1290, 915.1290, 927.5462, 947.0018, 1051.7703, 1060.1125, 1060.1126, 1083.1046, 1313.8103, 1313.8103, 1325.8025, 1339.7694, 1674.8976, 1874.0144, 2005.0609, 2124.1565, 2124.1565, 2151.1111, 2151.1111, 2212.2224, 2753.4365, 2753.4365

3. [gi|108750](#) Mass: 51391 Score: 121 Expect: 2.7e-005 Matches: 8

Ig heavy chain precursor (B/MT.4A.17.H5.A5) - bovine

| Observed  | Mr(expt)  | Mr(calc)  | ppm  | Start | End | Miss | Ions | Peptide                     |
|-----------|-----------|-----------|------|-------|-----|------|------|-----------------------------|
| 1169.6356 | 1168.6283 | 1168.5625 | 56.3 | 329   | 338 | 0    | ---  | R.IQHQQDWTGGK.E             |
| 1169.6356 | 1168.6283 | 1168.5625 | 56.3 | 329   | 338 | 0    | ---  | R.IQHQQDWTGGK.E             |
| 1301.8031 | 1300.7958 | 1300.7252 | 54.3 | 344   | 355 | 0    | ---  | K.VHNEGLPAPIVR.T            |
| 1301.8031 | 1300.7958 | 1300.7252 | 54.3 | 344   | 355 | 0    | 51   | K.VHNEGLPAPIVR.T            |
| 2112.1482 | 2111.1409 | 2111.0324 | 51.4 | 296   | 313 | 0    | 46   | K.FSWFVDDVEVNTATTKPR.E      |
| 2112.1482 | 2111.1409 | 2111.0324 | 51.4 | 296   | 313 | 0    | ---  | K.FSWFVDDVEVNTATTKPR.E      |
| 2753.4365 | 2752.4292 | 2752.2877 | 51.4 | 382   | 404 | 0    | ---  | K.STVSLTCMVTSFYPDYIAVEWQR.N |
| 2753.4365 | 2752.4292 | 2752.2877 | 51.4 | 382   | 404 | 0    | ---  | K.STVSLTCMVTSFYPDYIAVEWQR.N |

No match to: 841.1960, 841.1960, 842.5637, 855.0995, 871.0715, 882.6186, 882.6186, 893.0596, 909.0323, 915.1290, 915.1290, 927.5462, 947.0018, 1051.7703, 1060.1125, 1060.1126, 1083.1046, 1313.8103, 1313.8103, 1325.8025, 1339.7694, 1674.8976, 1874.0144, 2005.0609, 2124.1565, 2124.1565, 2151.1111, 2151.1111, 2212.2224

4. [gi|91982959](#) Mass: 36562 Score: 71 Expect: 2.9 Matches: 6

immunoglobulin gamma 1 heavy chain constant region [Bos taurus]

| Observed  | Mr(expt)  | Mr(calc)  | ppm  | Start | End | Miss | Ions | Peptide                     |
|-----------|-----------|-----------|------|-------|-----|------|------|-----------------------------|
| 1169.6356 | 1168.6283 | 1168.5625 | 56.3 | 188   | 197 | 0    | ---  | R.IQHQQDWTGGK.E             |
| 1169.6356 | 1168.6283 | 1168.5625 | 56.3 | 188   | 197 | 0    | ---  | R.IQHQQDWTGGK.E             |
| 1301.8031 | 1300.7958 | 1300.7252 | 54.3 | 203   | 214 | 0    | ---  | K.VHNEGLPAPIVR.T            |
| 1301.8031 | 1300.7958 | 1300.7252 | 54.3 | 203   | 214 | 0    | 51   | K.VHNEGLPAPIVR.T            |
| 2753.4365 | 2752.4292 | 2752.2877 | 51.4 | 241   | 263 | 0    | ---  | K.STVSLTCMVTSFYPDYIAVEWQR.N |
| 2753.4365 | 2752.4292 | 2752.2877 | 51.4 | 241   | 263 | 0    | ---  | K.STVSLTCMVTSFYPDYIAVEWQR.N |

No match to: 841.1960, 841.1960, 842.5637, 855.0995, 871.0715, 882.6186, 882.6186, 893.0596, 909.0323, 915.1290, 915.1290, 927.5462, 947.0018, 1051.7703, 1060.1125, 1060.1126, 1083.1046, 1313.8103, 1313.8103, 1325.8025, 1339.7694, 1674.8976, 1874.0144, 2005.0609, 2112.1482, 2112.1482, 2124.1565, 2124.1565, 2151.1111, 2151.1111, 2212.2224

5. [gi|498046415](#) Mass: 7331 Score: 56 Expect: 83 Matches: 5

hypothetical protein [Neisseria gonorrhoeae]

| Observed  | Mr(expt)  | Mr(calc)  | ppm  | Start | End | Miss | Ions | Peptide                                     |
|-----------|-----------|-----------|------|-------|-----|------|------|---------------------------------------------|
| 1874.0144 | 1873.0071 | 1872.9516 | 29.6 | 2     | 17  | 1    | ---  | M.PSERLSDGIFPCILNR.V                        |
| 2005.0609 | 2004.0536 | 2003.9921 | 30.7 | 1     | 17  | 1    | ---  | -M.PSERLSDGIFPCILNR.V                       |
| 2212.2224 | 2211.2151 | 2211.0114 | 92.2 | 47    | 69  | 0    | ---  | K.GLMPSESGDGIIGESEAVAHAQ.-                  |
| 2753.4365 | 2752.4292 | 2752.1680 | 94.9 | 18    | 42  | 1    | ---  | R.VYETPDAGGNGVCCAMFGDQRTK.C + Oxidation (M) |
| 2753.4365 | 2752.4292 | 2752.1680 | 94.9 | 18    | 42  | 1    | ---  | R.VYETPDAGGNGVCCAMFGDQRTK.C + Oxidation (M) |

No match to: 841.1960, 841.1960, 842.5637, 855.0995, 871.0715, 882.6186, 882.6186, 893.0596, 909.0323, 915.1290, 915.1290, 927.5462, 947.0018, 1051.7703, 1060.1125, 1060.1126, 1083.1046, 1169.6356, 1169.6356, 1301.8031, 1301.8031, 1313.8103, 1313.8103, 1325.8025, 1339.7694, 1674.8976, 2112.1482, 2112.1482, 2124.1565, 2124.1565, 2151.1111, 2151.1111

6. [gi|337290484](#) Mass: 15574 Score: 56 Expect: 91 Matches: 7

hypothetical protein CULC22\_00873 [Corynebacterium ulcerans BR-AD22]

| Observed  | Mr(expt)  | Mr(calc)  | ppm   | Start | End | Miss | Ions | Peptide                       |
|-----------|-----------|-----------|-------|-------|-----|------|------|-------------------------------|
| 1169.6356 | 1168.6283 | 1168.6339 | -4.81 | 73    | 83  | 0    | ---  | R.LGLPSLDTPEK.G               |
| 1169.6356 | 1168.6283 | 1168.6339 | -4.79 | 73    | 83  | 0    | ---  | R.LGLPSLDTPEK.G               |
| 1313.8103 | 1312.8030 | 1312.6888 | 87.0  | 118   | 129 | 1    | ---  | K.VEPASHATFARK.G              |
| 1313.8103 | 1312.8030 | 1312.6888 | 87.0  | 117   | 128 | 1    | ---  | R.KVEPASHATFAR.K              |
| 1325.8025 | 1324.7952 | 1324.7350 | 45.4  | 72    | 83  | 1    | ---  | K.RLGLPSLDTPEK.G              |
| 2753.4365 | 2752.4292 | 2752.4535 | -8.81 | 73    | 98  | 1    | ---  | R.LGLPSLDTPEKGPELGDNVLLVDGK.G |
| 2753.4365 | 2752.4292 | 2752.4535 | -8.80 | 73    | 98  | 1    | ---  | R.LGLPSLDTPEKGPELGDNVLLVDGK.G |

No match to: 841.1960, 841.1960, 842.5637, 855.0995, 871.0715, 882.6186, 882.6186, 893.0596, 909.0323, 915.1290, 915.1290, 927.5462, 947.0018, 1051.7703, 1060.1125, 1060.1126, 1083.1046, 1301.8031, 1301.8031, 1339.7694, 1674.8976, 1874.0144, 2005.0609, 2112.1482, 2112.1482, 2124.1565, 2124.1565, 2151.1111, 2151.1111, 2212.2224

7. [gi|546357233](#) Mass: 26141 Score: 55 Expect: 1.1e+002 Matches: 9

putative uncharacterized protein [Blautia hydrogenotrophica CAG:147]

| Observed  | Mr(expt)  | Mr(calc)  | ppm    | Start | End | Miss | Ions | Peptide                         |
|-----------|-----------|-----------|--------|-------|-----|------|------|---------------------------------|
| 1169.6356 | 1168.6283 | 1168.6889 | -51.86 | 105   | 114 | 0    | ---  | K.NILMPLILDK.R                  |
| 1169.6356 | 1168.6283 | 1168.6889 | -51.84 | 105   | 114 | 0    | ---  | K.NILMPLILDK.R                  |
| 1313.8103 | 1312.8030 | 1312.7788 | 18.4   | 104   | 114 | 1    | ---  | R.KNILMPLILDK.R + Oxidation (M) |

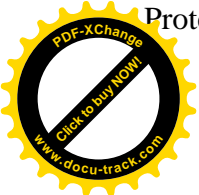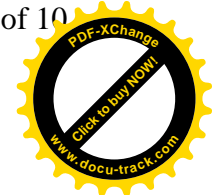

1313.8103 1312.8030 1312.7788 18.4 104 - 114 1 --- R.KNILMPLILDK.R + Oxidation (M)  
 1325.8025 1324.7952 1324.7900 3.91 105 - 115 1 --- K.NILMPLILDK.R  
 2124.1565 2123.1492 2123.2143 -30.65 86 - 103 1 --- R.KVGLVYQFYNLPTLTVR.K  
 2124.1565 2123.1492 2123.2143 -30.65 87 - 104 1 --- K.VGLVYQFYNLPTLTVRK.N  
 2151.1111 2150.1038 2150.1372 -15.51 211 - 229 1 --- R.IITIEDGKIHDVFHDSAK.W  
 2151.1111 2150.1038 2150.1372 -15.50 211 - 229 1 --- R.IITIEDGKIHDVFHDSAK.W

**No match to:** 841.1960, 841.1960, 842.5637, 855.0995, 871.0715, 882.6186, 882.6186, 893.0596, 909.0323, 915.1290, 915.1290, 927.5462, 947.0018, 1051.7703, 1060.1125, 1060.1126, 1083.1046, 1301.8031, 1301.8031, 1339.7694, 1674.8976, 1874.0144, 2005.0609, 2112.1482, 2112.1482, 2212.2224, 2753.4365, 2753.4365

8. [gi|489983378](#) Mass: 9455 Score: 54 Expect: 1.4e+002 Matches: 7

hypothetical protein [Mycobacterium phlei]

| Observed  | Mr(expt)  | Mr(calc)  | ppm  | Start   | End | Miss | Ions | Peptide                        |
|-----------|-----------|-----------|------|---------|-----|------|------|--------------------------------|
| 1874.0144 | 1873.0071 | 1872.9806 | 14.2 | 10 - 28 | 0   | ---  | ---  | R.ALAAAHTAHDELTAIAAR.L         |
| 2112.1482 | 2111.1409 | 2110.9702 | 80.9 | 67 - 87 | 1   | ---  | ---  | R.MAQTAVSAARAATAYDDADGR.V      |
| 2112.1482 | 2111.1409 | 2110.9702 | 80.9 | 67 - 87 | 1   | ---  | ---  | R.MAQTAVSAARAATAYDDADGR.V      |
| 2124.1565 | 2123.1492 | 2123.1375 | 5.51 | 29 - 50 | 0   | ---  | ---  | R.LSNTPTPAGLGPVGADFAALR.A      |
| 2124.1565 | 2123.1492 | 2123.1375 | 5.52 | 29 - 50 | 0   | ---  | ---  | R.LSNTPTPAGLGPVGADFAALR.A      |
| 2753.4365 | 2752.4292 | 2752.4004 | 10.5 | 2 - 28  | 1   | ---  | ---  | M.HADTDAIRALAAAHTAHDELTAIAAR.L |
| 2753.4365 | 2752.4292 | 2752.4004 | 10.5 | 2 - 28  | 1   | ---  | ---  | M.HADTDAIRALAAAHTAHDELTAIAAR.L |

**No match to:** 841.1960, 841.1960, 842.5637, 855.0995, 871.0715, 882.6186, 882.6186, 893.0596, 909.0323, 915.1290, 915.1290, 927.5462, 947.0018, 1051.7703, 1060.1125, 1060.1126, 1083.1046, 1169.6356, 1169.6356, 1301.8031, 1301.8031, 1313.8103, 1313.8103, 1325.8025, 1339.7694, 1674.8976, 2005.0609, 2151.1111, 2151.1111, 2212.2224

9. [gi|490762382](#) Mass: 56174 Score: 54 Expect: 1.4e+002 Matches: 11

Endoglucanase [Clostridium termitidis]

| Observed  | Mr(expt)  | Mr(calc)  | ppm  | Start     | End | Miss | Ions | Peptide                                   |
|-----------|-----------|-----------|------|-----------|-----|------|------|-------------------------------------------|
| 927.5462  | 926.5389  | 926.5185  | 22.0 | 223 - 230 | 1   | ---  | ---  | K.AIRDIDPK.H                              |
| 1301.8031 | 1300.7958 | 1300.6809 | 88.3 | 49 - 60   | 1   | ---  | ---  | K.HMLDTLGSVKGK.M + Oxidation (M)          |
| 1301.8031 | 1300.7958 | 1300.6809 | 88.3 | 49 - 60   | 1   | ---  | ---  | K.HMLDTLGSVKGK.M + Oxidation (M)          |
| 1313.8103 | 1312.8030 | 1312.7827 | 15.5 | 11 - 22   | 1   | ---  | ---  | K.IINTSGKVVNLR.G                          |
| 1313.8103 | 1312.8030 | 1312.7827 | 15.5 | 11 - 22   | 1   | ---  | ---  | K.IINTSGKVVNLR.G                          |
| 1874.0144 | 1873.0071 | 1872.9979 | 4.94 | 1 - 17    | 1   | ---  | ---  | -.MDLLQIENGKIINTSGK.V                     |
| 2151.1111 | 2150.1038 | 2150.0545 | 22.9 | 382 - 400 | 1   | ---  | ---  | R.NLGAENFVAQYWDSPGRVK.S                   |
| 2151.1111 | 2150.1038 | 2150.0545 | 22.9 | 382 - 400 | 1   | ---  | ---  | R.NLGAENFVAQYWDSPGRVK.S                   |
| 2212.2224 | 2211.2151 | 2211.0498 | 74.8 | 305 - 323 | 0   | ---  | ---  | R.QHNVPPIWVGEFGSQYHGEK.E                  |
| 2753.4365 | 2752.4292 | 2752.1785 | 91.1 | 332 - 353 | 0   | ---  | ---  | K.AMDDQLAVYNECDINWTTWYK.D + Oxidation (M) |
| 2753.4365 | 2752.4292 | 2752.1785 | 91.1 | 332 - 353 | 0   | ---  | ---  | K.AMDDQLAVYNECDINWTTWYK.D + Oxidation (M) |

**No match to:** 841.1960, 841.1960, 842.5637, 855.0995, 871.0715, 882.6186, 882.6186, 893.0596, 909.0323, 915.1290, 915.1290, 947.0018, 1051.7703, 1060.1125, 1060.1126, 1083.1046, 1169.6356, 1169.6356, 1325.8025, 1339.7694, 1674.8976, 2005.0609, 2112.1482, 2112.1482, 2124.1565, 2124.1565

10. [gi|518548361](#) Mass: 35653 Score: 53 Expect: 1.9e+002 Matches: 9

LysR family transcriptional regulator [Ralstonia solanacearum]

| Observed  | Mr(expt)  | Mr(calc)  | ppm    | Start     | End | Miss | Ions | Peptide                            |
|-----------|-----------|-----------|--------|-----------|-----|------|------|------------------------------------|
| 1339.7694 | 1338.7621 | 1338.7846 | -16.77 | 266 - 277 | 1   | ---  | ---  | R.ILPAPVAFPKMR.F                   |
| 1874.0144 | 1873.0071 | 1872.8975 | 58.6   | 1 - 15    | 1   | ---  | ---  | -.MQMHGKDHLDYTLR.V + Oxidation (M) |
| 2005.0609 | 2004.0536 | 2003.9986 | 27.5   | 298 - 316 | 0   | ---  | ---  | R.MIGEVAELPQHPQLETA.-              |
| 2124.1565 | 2123.1492 | 2123.0444 | 49.4   | 194 - 211 | 0   | ---  | ---  | K.HYIEMPHLAPAPYAVMQR.S             |
| 2124.1565 | 2123.1492 | 2123.0444 | 49.4   | 194 - 211 | 0   | ---  | ---  | K.HYIEMPHLAPAPYAVMQR.S             |
| 2151.1111 | 2150.1038 | 2150.2074 | -48.19 | 226 - 243 | 1   | ---  | ---  | R.RIQVSLPYFGLVPYVLMR.T             |
| 2151.1111 | 2150.1038 | 2150.2074 | -48.18 | 226 - 243 | 1   | ---  | ---  | R.RIQVSLPYFGLVPYVLMR.T             |
| 2753.4365 | 2752.4292 | 2752.3636 | 23.8   | 61 - 85   | 1   | ---  | ---  | K.SGMVPTERGHELLALAQSSLEAMER.I      |
| 2753.4365 | 2752.4292 | 2752.3636 | 23.9   | 61 - 85   | 1   | ---  | ---  | K.SGMVPTERGHELLALAQSSLEAMER.I      |

**No match to:** 841.1960, 841.1960, 842.5637, 855.0995, 871.0715, 882.6186, 882.6186, 893.0596, 909.0323, 915.1290, 915.1290, 927.5462, 947.0018, 1051.7703, 1060.1125, 1060.1126, 1083.1046, 1169.6356, 1169.6356, 1301.8031, 1301.8031, 1313.8103, 1313.8103, 1325.8025, 1339.7694, 1674.8976, 2112.1482, 2112.1482, 2124.1565, 2124.1565, 2151.1111, 2151.1111, 2212.2224

11. [gi|327305893](#) Mass: 11598 Score: 52 Expect: 2.4e+002 Matches: 5

hypothetical protein TERG\_02355 [Trichophyton rubrum CBS 118892]

| Observed  | Mr(expt)  | Mr(calc)  | ppm    | Start   | End | Miss | Ions | Peptide                                        |
|-----------|-----------|-----------|--------|---------|-----|------|------|------------------------------------------------|
| 1169.6356 | 1168.6283 | 1168.6604 | -27.47 | 42 - 51 | 0   | ---  | ---  | R.QLPAYVLHTK.E                                 |
| 1169.6356 | 1168.6283 | 1168.6604 | -27.46 | 42 - 51 | 0   | 18   | ---  | R.QLPAYVLHTK.E                                 |
| 2005.0609 | 2004.0536 | 2004.0462 | 3.68   | 13 - 29 | 1   | ---  | ---  | K.VVDDQTWMLVLRSSSLR.I                          |
| 2753.4365 | 2752.4292 | 2752.3048 | 45.2   | 1 - 24  | 1   | ---  | ---  | -.MIGSQDEAASEKVVDDQTWMLVLR.S + 2 Oxidation (M) |
| 2753.4365 | 2752.4292 | 2752.3048 | 45.2   | 1 - 24  | 1   | ---  | ---  | -.MIGSQDEAASEKVVDDQTWMLVLR.S + 2 Oxidation (M) |

**No match to:** 841.1960, 841.1960, 842.5637, 855.0995, 871.0715, 882.6186, 882.6186, 893.0596, 909.0323, 915.1290, 915.1290, 927.5462, 947.0018, 1051.7703, 1060.1125, 1060.1126, 1083.1046, 1301.8031, 1301.8031, 1313.8103, 1313.8103, 1325.8025, 1339.7694, 1674.8976, 1874.0144, 2112.1482, 2112.1482, 2124.1565, 2124.1565, 2151.1111, 2151.1111, 2212.2224

12. [gi|171688784](#) Mass: 30526 Score: 50 Expect: 3.1e+002 Matches: 10

hypothetical protein [Podospira anserina S mat+]

| Observed  | Mr(expt)  | Mr(calc)  | ppm    | Start     | End | Miss | Ions | Peptide                                |
|-----------|-----------|-----------|--------|-----------|-----|------|------|----------------------------------------|
| 1169.6356 | 1168.6283 | 1168.6564 | -24.03 | 11 - 21   | 0   | ---  | ---  | R.LQGVIANLEGR.V                        |
| 1169.6356 | 1168.6283 | 1168.6564 | -24.01 | 11 - 21   | 0   | ---  | ---  | R.LQGVIANLEGR.V                        |
| 1301.8031 | 1300.7958 | 1300.6987 | 74.7   | 264 - 276 | 1   | ---  | ---  | K.AGSTILSKLTHSS.-                      |
| 1301.8031 | 1300.7958 | 1300.6987 | 74.7   | 264 - 276 | 1   | ---  | ---  | K.AGSTILSKLTHSS.-                      |
| 1325.8025 | 1324.7952 | 1324.7575 | 28.5   | 10 - 21   | 1   | ---  | ---  | K.RLQGVIANLEGR.V                       |
| 2005.0609 | 2004.0536 | 2004.0635 | -4.94  | 92 - 110  | 1   | ---  | ---  | K.KIMDAGGLVSDIVIGMIK.E + Oxidation (M) |
| 2112.1482 | 2111.1409 | 2111.0687 | 34.2   | 214 - 230 | 1   | ---  | ---  | R.LETYHKQTTPVVNYQK.T                   |
| 2112.1482 | 2111.1409 | 2111.0687 | 34.2   | 214 - 230 | 1   | ---  | ---  | R.LETYHKQTTPVVNYQK.T                   |
| 2124.1565 | 2123.1492 | 2122.9711 | 83.9   | 65 - 82   | 1   | ---  | ---  | K.FNCCHLATGDMRLSQVAK.K + Oxidation (M) |
| 2124.1565 | 2123.1492 | 2122.9711 | 83.9   | 65 - 82   | 1   | ---  | ---  | K.FNCCHLATGDMRLSQVAK.K + Oxidation (M) |

**No match to:** 841.1960, 841.1960, 842.5637, 855.0995, 871.0715, 882.6186, 882.6186, 893.0596, 909.0323, 915.1290, 915.1290, 927.5462, 947.0018, 1051.7703, 1060.1125, 1060.1126, 1083.1046, 1313.8103, 1313.8103, 1339.7694, 1674.8976, 1874.0144, 2151.1111, 2151.1111, 2212.2224, 2753.4365, 2753.4365

13. [gi|495323294](#) Mass: 9800 Score: 50 Expect: 3.1e+002 Matches: 5

hypothetical protein [Reinekea blandensis]

| Observed | Mr(expt) | Mr(calc) | ppm | Start | End | Miss | Ions | Peptide |
|----------|----------|----------|-----|-------|-----|------|------|---------|
|----------|----------|----------|-----|-------|-----|------|------|---------|



1301.8031 1300.7958 1300.7350 46.7 27 - 38 1 --- R.AKLSQKPTVDSK.R  
 1301.8031 1300.7958 1300.7350 46.7 27 - 38 1 --- R.AKLSQKPTVDSK.R  
 1339.7694 1338.7621 1338.6425 89.4 74 - 85 1 --- R.VGFDAVCGKCVK.R  
 2753.4365 2752.4292 2752.4258 1.23 41 - 64 1 --- K.VSQTDGIPLVNMENFALFVFLDRK.T  
 2753.4365 2752.4292 2752.4258 1.24 40 - 63 1 --- R.KVSQTDGIPLVNMENFALFVFLDRK.K  
**No match to:** 841.1960, 841.1960, 842.5637, 855.0995, 871.0715, 882.6186, 882.6186, 893.0596, 909.0323, 915.1290, 915.1290, 927.5462, 947.0018, 1051.7703, 1060.1125, 1060.1126, 1083.1046, 1169.6356, 1169.6356, 1313.8103, 1313.8103, 1325.8025, 1674.8976, 1874.0144, 2005.0609, 2112.1482, 2112.1482, 2124.1565, 2124.1565, 2151.1111, 2151.1111, 2212.2224

14. [gi|255291985](#) Mass: 7225 Score: 50 Expect: 3.4e+002 Matches: 6

hypothetical protein [uncultured bacterium]

| Observed  | Mr(expt)  | Mr(calc)  | ppm  | Start | End | Miss | Ions | Peptide                         |
|-----------|-----------|-----------|------|-------|-----|------|------|---------------------------------|
| 1169.6356 | 1168.6283 | 1168.6022 | 22.3 | 3     | 12  | 0    | ---  | R.MIAIHAQTER.K                  |
| 1169.6356 | 1168.6283 | 1168.6022 | 22.3 | 3     | 12  | 0    | ---  | R.MIAIHAQTER.K                  |
| 1313.8103 | 1312.8030 | 1312.6921 | 84.5 | 3     | 13  | 1    | ---  | R.MIAIHAQTERK.R + Oxidation (M) |
| 1313.8103 | 1312.8030 | 1312.6921 | 84.5 | 3     | 13  | 1    | ---  | R.MIAIHAQTERK.R + Oxidation (M) |
| 1325.8025 | 1324.7952 | 1324.7034 | 69.4 | 2     | 12  | 1    | ---  | M.RMIAIHAQTER.K                 |
| 2212.2224 | 2211.2151 | 2211.1365 | 35.6 | 34    | 54  | 1    | ---  | R.LRGLIRPDPAVCATASAACGR.K       |

**No match to:** 841.1960, 841.1960, 842.5637, 855.0995, 871.0715, 882.6186, 882.6186, 893.0596, 909.0323, 915.1290, 915.1290, 927.5462, 947.0018, 1051.7703, 1060.1125, 1060.1126, 1083.1046, 1169.6356, 1169.6356, 1301.8031, 1301.8031, 1339.7694, 1674.8976, 1874.0144, 2005.0609, 2112.1482, 2112.1482, 2124.1565, 2124.1565, 2151.1111, 2151.1111, 2753.4365, 2753.4365

15. [gi|492883710](#) Mass: 4310 Score: 50 Expect: 3.5e+002 Matches: 4

hypothetical protein [Afipia broomeae]

| Observed  | Mr(expt)  | Mr(calc)  | ppm    | Start | End | Miss | Ions | Peptide                         |
|-----------|-----------|-----------|--------|-------|-----|------|------|---------------------------------|
| 1325.8025 | 1324.7952 | 1324.7134 | 61.7   | 1     | 11  | 0    | ---  | -.MTMLAEIFLLK.L + Oxidation (M) |
| 1339.7694 | 1338.7621 | 1338.7983 | -27.02 | 12    | 23  | 1    | ---  | K.LEALLRVAADR.R                 |
| 1874.0144 | 1873.0071 | 1873.1110 | -55.47 | 2     | 17  | 1    | ---  | M.TMLAEIFLLKLEALLR.V            |
| 2005.0609 | 2004.0536 | 2004.1515 | -48.84 | 1     | 17  | 1    | ---  | -.MTMLAEIFLLKLEALLR.V           |

**No match to:** 841.1960, 841.1960, 842.5637, 855.0995, 871.0715, 882.6186, 882.6186, 893.0596, 909.0323, 915.1290, 915.1290, 927.5462, 947.0018, 1051.7703, 1060.1125, 1060.1126, 1083.1046, 1169.6356, 1169.6356, 1301.8031, 1301.8031, 1313.8103, 1313.8103, 1674.8976, 1874.0144, 2112.1482, 2112.1482, 2124.1565, 2124.1565, 2151.1111, 2151.1111, 2212.2224, 2753.4365, 2753.4365

16. [gi|551336008](#) Mass: 5799 Score: 49 Expect: 4.5e+002 Matches: 4

hypothetical protein [Perlucidibaca piscinae]

| Observed  | Mr(expt)  | Mr(calc)  | ppm   | Start | End | Miss | Ions | Peptide                                 |
|-----------|-----------|-----------|-------|-------|-----|------|------|-----------------------------------------|
| 1301.8031 | 1300.7958 | 1300.6809 | 88.4  | 9     | 21  | 0    | ---  | K.GIPSPSLVASMRSR.C                      |
| 1301.8031 | 1300.7958 | 1300.6809 | 88.4  | 9     | 21  | 0    | 13   | K.GIPSPSLVASMRSR.C                      |
| 1674.8976 | 1673.8903 | 1673.8341 | 33.6  | 9     | 24  | 1    | ---  | K.GIPSPSLVASMRSRCGR.V                   |
| 2005.0609 | 2004.0536 | 2004.0714 | -8.87 | 3     | 21  | 1    | ---  | R.VVTPYKGPSPSLVASMRSR.C + Oxidation (M) |

**No match to:** 841.1960, 841.1960, 842.5637, 855.0995, 871.0715, 882.6186, 882.6186, 893.0596, 909.0323, 915.1290, 915.1290, 927.5462, 947.0018, 1051.7703, 1060.1125, 1060.1126, 1083.1046, 1169.6356, 1169.6356, 1313.8103, 1313.8103, 1325.8025, 1339.7694, 1874.0144, 2112.1482, 2112.1482, 2124.1565, 2124.1565, 2151.1111, 2151.1111, 2212.2224, 2753.4365, 2753.4365

17. [gi|495360281](#) Mass: 22699 Score: 48 Expect: 5.1e+002 Matches: 8

hypothetical protein [Pseudomonas sp. GM80]

| Observed  | Mr(expt)  | Mr(calc)  | ppm  | Start | End | Miss | Ions | Peptide                                   |
|-----------|-----------|-----------|------|-------|-----|------|------|-------------------------------------------|
| 1169.6356 | 1168.6283 | 1168.6274 | 0.77 | 1     | 10  | 0    | ---  | -.MPDLITPQVR.K                            |
| 1169.6356 | 1168.6283 | 1168.6274 | 0.79 | 1     | 10  | 0    | ---  | -.MPDLITPQVR.K                            |
| 1313.8103 | 1312.8030 | 1312.7173 | 65.3 | 1     | 11  | 1    | ---  | -.MPDLITPQVRK.L + Oxidation (M)           |
| 1313.8103 | 1312.8030 | 1312.7173 | 65.3 | 1     | 11  | 1    | ---  | -.MPDLITPQVRK.L + Oxidation (M)           |
| 1674.8976 | 1673.8903 | 1673.8559 | 20.6 | 40    | 53  | 1    | ---  | R.MRAWELADVDSLLR.E                        |
| 2005.0609 | 2004.0536 | 2003.9548 | 49.3 | 12    | 30  | 0    | ---  | K.LAAIGYGEASTDNNPQEV.R                    |
| 2112.1482 | 2111.1409 | 2110.9411 | 94.6 | 70    | 88  | 0    | ---  | R.YNQLMAASEAAINADPNMR.S + 2 Oxidation (M) |
| 2112.1482 | 2111.1409 | 2110.9411 | 94.6 | 70    | 88  | 0    | ---  | R.YNQLMAASEAAINADPNMR.S + 2 Oxidation (M) |

**No match to:** 841.1960, 841.1960, 842.5637, 855.0995, 871.0715, 882.6186, 882.6186, 893.0596, 909.0323, 915.1290, 915.1290, 927.5462, 947.0018, 1051.7703, 1060.1125, 1060.1126, 1083.1046, 1301.8031, 1301.8031, 1325.8025, 1339.7694, 1874.0144, 2124.1565, 2124.1565, 2151.1111, 2151.1111, 2212.2224, 2753.4365, 2753.4365

18. [gi|487598108](#) Mass: 4479 Score: 48 Expect: 5.1e+002 Matches: 3

propanediol utilization ferredoxin, partial [Salmonella enterica]

| Observed  | Mr(expt)  | Mr(calc)  | ppm    | Start | End | Miss | Ions | Peptide                                 |
|-----------|-----------|-----------|--------|-------|-----|------|------|-----------------------------------------|
| 2005.0609 | 2004.0536 | 2004.0905 | -18.41 | 23    | 44  | 1    | ---  | R.AAGVVGAGGAGFPAHVKLQAV.-               |
| 2124.1565 | 2123.1492 | 2123.0164 | 62.6   | 2     | 20  | 1    | 21   | M.STAINSEVMSLSADEIRER.V + Oxidation (M) |
| 2124.1565 | 2123.1492 | 2123.0164 | 62.6   | 2     | 20  | 1    | ---  | M.STAINSEVMSLSADEIRER.V + Oxidation (M) |

**No match to:** 841.1960, 841.1960, 842.5637, 855.0995, 871.0715, 882.6186, 882.6186, 893.0596, 909.0323, 915.1290, 915.1290, 927.5462, 947.0018, 1051.7703, 1060.1125, 1060.1126, 1083.1046, 1169.6356, 1169.6356, 1301.8031, 1301.8031, 1313.8103, 1313.8103, 1325.8025, 1339.7694, 1674.8976, 1874.0144, 2112.1482, 2112.1482, 2151.1111, 2151.1111, 2212.2224, 2753.4365, 2753.4365

19. [gi|401763462](#) Mass: 16967 Score: 48 Expect: 5.6e+002 Matches: 6

hypothetical protein ECENHK\_09860 [Enterobacter cloacae subsp. cloacae ENHKU01]

| Observed  | Mr(expt)  | Mr(calc)  | ppm   | Start | End | Miss | Ions | Peptide                   |
|-----------|-----------|-----------|-------|-------|-----|------|------|---------------------------|
| 842.5637  | 841.5564  | 841.5637  | -8.60 | 77    | 84  | 0    | ---  | K.IALATI.IK               |
| 1169.6356 | 1168.6283 | 1168.6200 | 7.11  | 85    | 95  | 0    | ---  | K.IGPGNIEINSR.R           |
| 1169.6356 | 1168.6283 | 1168.6135 | 12.7  | 33    | 42  | 1    | ---  | K.RLISNHNGMK.K            |
| 1325.8025 | 1324.7952 | 1324.7211 | 55.9  | 85    | 96  | 1    | ---  | K.IGPGNIEINSR.R           |
| 2753.4365 | 2752.4292 | 2752.4125 | 6.06  | 110   | 132 | 0    | ---  | K.QVQFYNNLTWNHNTAFLAAIK.R |
| 2753.4365 | 2752.4292 | 2752.4125 | 6.07  | 110   | 132 | 0    | ---  | K.QVQFYNNLTWNHNTAFLAAIK.R |

**No match to:** 841.1960, 841.1960, 855.0995, 871.0715, 882.6186, 882.6186, 893.0596, 909.0323, 915.1290, 915.1290, 927.5462, 947.0018, 1051.7703, 1060.1125, 1060.1126, 1083.1046, 1301.8031, 1301.8031, 1313.8103, 1313.8103, 1339.7694, 1674.8976, 1874.0144, 2005.0609, 2112.1482, 2112.1482, 2124.1565, 2124.1565, 2151.1111, 2151.1111, 2212.2224

20. [gi|553884411](#) Mass: 20219 Score: 47 Expect: 7.1e+002 Matches: 7

integrase [Gloeobacter sp. JS1]

| Observed  | Mr(expt)  | Mr(calc)  | ppm  | Start | End | Miss | Ions | Peptide          |
|-----------|-----------|-----------|------|-------|-----|------|------|------------------|
| 1169.6356 | 1168.6283 | 1168.5764 | 44.4 | 138   | 146 | 0    | ---  | R.FIEEVYNQK.R    |
| 1169.6356 | 1168.6283 | 1168.5764 | 44.4 | 138   | 146 | 0    | ---  | R.FIEEVYNQK.R    |
| 1301.8031 | 1300.7958 | 1300.6987 | 74.7 | 45    | 56  | 0    | ---  | R.NIDGELTSLALR.M |
| 1301.8031 | 1300.7958 | 1300.6987 | 74.7 | 45    | 56  | 0    | ---  | R.NIDGELTSLALR.M |





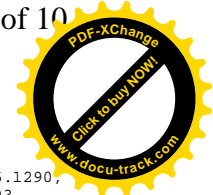

2753.4365 2752.4292 2752.1707 93.9 23 - 48 0 --- R.LDGPFSYDAMVSGVPYSGDCIGVSMPL- + 2 Oxidation (M)

**No match to:** 841.1960, 841.1960, 842.5637, 855.0995, 871.0715, 882.6186, 882.6186, 893.0596, 909.0323, 915.1290, 915.1290, 927.5462, 947.0018, 1051.7703, 1060.1125, 1060.1126, 1083.1046, 1169.6356, 1169.6356, 1301.8031, 1301.8031, 1313.8103, 1313.8103, 1325.8025, 1339.7694, 1674.8976, 2112.1482, 2112.1482, 2124.1565, 2124.1565, 2151.1111, 2151.1111, 2212.2224

27. [gi|495396594](#) Mass: 25331 Score: 45 Expect: 1.2e+003 Matches: 7

peptide ABC transporter ATP-binding protein [[Bacteroides] pectinophilus]

| Observed  | Mr(expt)  | Mr(calc)  | ppm    | Start | End | Miss | Ions | Peptide                         |
|-----------|-----------|-----------|--------|-------|-----|------|------|---------------------------------|
| 1169.6356 | 1168.6283 | 1168.6889 | -51.86 | 105   | -   | 114  | 0    | K.NILMPLLLDK.R                  |
| 1169.6356 | 1168.6283 | 1168.6889 | -51.84 | 105   | -   | 114  | 0    | K.NILMPLLLDK.R                  |
| 1313.8103 | 1312.8030 | 1312.7788 | 18.4   | 104   | -   | 114  | 1    | R.KNILMPLLLDK.R + Oxidation (M) |
| 1313.8103 | 1312.8030 | 1312.7788 | 18.4   | 104   | -   | 114  | 1    | R.KNILMPLLLDK.R + Oxidation (M) |
| 1325.8025 | 1324.7952 | 1324.7900 | 3.91   | 105   | -   | 115  | 1    | K.NILMPLLLDKR.K                 |
| 2124.1565 | 2123.1492 | 2123.2143 | -30.65 | 86    | -   | 103  | 1    | R.KVGLVYQFYNIPTLTVR.K           |
| 2124.1565 | 2123.1492 | 2123.2143 | -30.65 | 87    | -   | 104  | 1    | K.VGLVYQFYNIPTLTVRK.N           |

**No match to:** 841.1960, 841.1960, 842.5637, 855.0995, 871.0715, 882.6186, 882.6186, 893.0596, 909.0323, 915.1290, 915.1290, 927.5462, 947.0018, 1051.7703, 1060.1125, 1060.1126, 1083.1046, 1301.8031, 1301.8031, 1339.7694, 1674.8976, 1874.0144, 2005.0609, 2112.1482, 2112.1482, 2151.1111, 2151.1111, 2212.2224, 2753.4365, 2753.4365

28. [gi|517950378](#) Mass: 44454 Score: 44 Expect: 1.2e+003 Matches: 9

hypothetical protein [Brevibacillus sp. phR]

| Observed  | Mr(expt)  | Mr(calc)  | ppm    | Start | End | Miss | Ions | Peptide                                     |
|-----------|-----------|-----------|--------|-------|-----|------|------|---------------------------------------------|
| 842.5637  | 841.5564  | 841.5273  | 34.6   | 399   | -   | 406  | 0    | K.LLDAVLAK.I                                |
| 1169.6356 | 1168.6283 | 1168.6023 | 22.3   | 36    | -   | 45   | 0    | R.VHVIMTENAR.K                              |
| 1169.6356 | 1168.6283 | 1168.6023 | 22.3   | 36    | -   | 45   | 0    | R.VHVIMTENAR.K                              |
| 1313.8103 | 1312.8030 | 1312.6921 | 84.5   | 36    | -   | 46   | 1    | R.VHVIMTENARK.F + Oxidation (M)             |
| 1313.8103 | 1312.8030 | 1312.6921 | 84.5   | 36    | -   | 46   | 1    | R.VHVIMTENARK.F + Oxidation (M)             |
| 1339.7694 | 1338.7621 | 1338.6350 | 95.0   | 226   | -   | 237  | 1    | K.MGYAIAEAARDR.G + Oxidation (M)            |
| 2005.0609 | 2004.0536 | 2004.1619 | -54.03 | 8     | -   | 28   | 1    | K.TIVLGVGTGGIAAYKAAALTSK.L                  |
| 2124.1565 | 2123.1492 | 2123.1660 | -7.92  | 1     | -   | 21   | 1    | -.MQSLTGKTIIVLGVGTGGIAAYK.A + Oxidation (M) |
| 2124.1565 | 2123.1492 | 2123.1660 | -7.92  | 1     | -   | 21   | 1    | -.MQSLTGKTIIVLGVGTGGIAAYK.A + Oxidation (M) |

**No match to:** 841.1960, 841.1960, 842.5637, 855.0995, 871.0715, 882.6186, 882.6186, 893.0596, 909.0323, 915.1290, 915.1290, 927.5462, 947.0018, 1051.7703, 1060.1125, 1060.1126, 1083.1046, 1301.8031, 1301.8031, 1325.8025, 1674.8976, 1874.0144, 2112.1482, 2112.1482, 2151.1111, 2151.1111, 2212.2224, 2753.4365, 2753.4365

29. [gi|493698297](#) Mass: 5437 Score: 44 Expect: 1.2e+003 Matches: 4

hypothetical protein [Haloterrigena thermotolerans]

| Observed  | Mr(expt)  | Mr(calc)  | ppm  | Start | End | Miss | Ions | Peptide                    |
|-----------|-----------|-----------|------|-------|-----|------|------|----------------------------|
| 1874.0144 | 1873.0071 | 1872.8523 | 82.7 | 2     | -   | 17   | 0    | M.TDAAECRPEPLEQETK.E       |
| 2005.0609 | 2004.0536 | 2003.8928 | 80.3 | 1     | -   | 17   | 0    | -.MTDAAECRPEPLEQETK.E      |
| 2753.4365 | 2752.4292 | 2752.1922 | 86.1 | 20    | -   | 43   | 0    | R.DDAHLDDIEGAGCTEWEHLAEK.R |
| 2753.4365 | 2752.4292 | 2752.1922 | 86.1 | 20    | -   | 43   | 0    | R.DDAHLDDIEGAGCTEWEHLAEK.R |

**No match to:** 841.1960, 841.1960, 842.5637, 855.0995, 871.0715, 882.6186, 882.6186, 893.0596, 909.0323, 915.1290, 915.1290, 927.5462, 947.0018, 1051.7703, 1060.1125, 1060.1126, 1083.1046, 1169.6356, 1169.6356, 1301.8031, 1301.8031, 1313.8103, 1313.8103, 1325.8025, 1339.7694, 1674.8976, 2112.1482, 2112.1482, 2124.1565, 2124.1565, 2151.1111, 2151.1111, 2212.2224

30. [gi|163839610](#) Mass: 17902 Score: 44 Expect: 1.2e+003 Matches: 7

nucleotide-binding protein [Renibacterium salmoninarum ATCC 33209]

| Observed  | Mr(expt)  | Mr(calc)  | ppm  | Start | End | Miss | Ions | Peptide                      |
|-----------|-----------|-----------|------|-------|-----|------|------|------------------------------|
| 927.5462  | 926.5389  | 926.5185  | 22.0 | 113   | -   | 120  | 1    | K.LIRDEGPK.G                 |
| 1169.6356 | 1168.6283 | 1168.5876 | 34.8 | 28    | -   | 36   | 1    | K.EIAQRYDFK.G                |
| 1169.6356 | 1168.6283 | 1168.5876 | 34.8 | 28    | -   | 36   | 1    | K.EIAQRYDFK.G                |
| 1313.8103 | 1312.8030 | 1312.7099 | 70.9 | 121   | -   | 132  | 1    | K.GVKAQIQGDEL.R.V            |
| 1313.8103 | 1312.8030 | 1312.6735 | 98.7 | 16    | -   | 27   | 0    | K.QEVANALNQAQK.E             |
| 2753.4365 | 2752.4292 | 2752.3742 | 20.0 | 139   | -   | 162  | 1    | R.DDLQATMTLLKGFDEADLQFVNLR.- |
| 2753.4365 | 2752.4292 | 2752.3742 | 20.0 | 139   | -   | 162  | 1    | R.DDLQATMTLLKGFDEADLQFVNLR.- |

**No match to:** 841.1960, 841.1960, 842.5637, 855.0995, 871.0715, 882.6186, 882.6186, 893.0596, 909.0323, 915.1290, 915.1290, 927.5462, 947.0018, 1051.7703, 1060.1125, 1060.1126, 1083.1046, 1301.8031, 1301.8031, 1325.8025, 1339.7694, 1674.8976, 1874.0144, 2005.0609, 2112.1482, 2112.1482, 2124.1565, 2124.1565, 2151.1111, 2151.1111, 2212.2224

31. [gi|548180461](#) Mass: 10887 Score: 44 Expect: 1.3e+003 Matches: 7

uncharacterized protein [Bacteroides uniformis CAG:3]

| Observed  | Mr(expt)  | Mr(calc)  | ppm  | Start | End | Miss | Ions | Peptide                                 |
|-----------|-----------|-----------|------|-------|-----|------|------|-----------------------------------------|
| 1169.6356 | 1168.6283 | 1168.5585 | 59.8 | 2     | -   | 10   | 1    | M.ERHELENSR.E                           |
| 1169.6356 | 1168.6283 | 1168.5585 | 59.8 | 2     | -   | 10   | 1    | M.ERHELENSR.E                           |
| 1874.0144 | 1873.0071 | 1872.8754 | 70.3 | 17    | -   | 31   | 1    | K.ELEHALNDYGNNEKR.F                     |
| 2124.1565 | 2123.1492 | 2123.1276 | 10.2 | 32    | -   | 49   | 1    | R.FASAVTTFHRTLQQTFLFR.S                 |
| 2124.1565 | 2123.1492 | 2123.1276 | 10.2 | 32    | -   | 49   | 1    | R.FASAVTTFHRTLQQTFLFR.S                 |
| 2151.1111 | 2150.1038 | 2150.0024 | 47.2 | 50    | -   | 68   | 1    | R.SMVEVIKTMGSEGYGYDLR.N + Oxidation (M) |
| 2151.1111 | 2150.1038 | 2150.0024 | 47.2 | 50    | -   | 68   | 1    | R.SMVEVIKTMGSEGYGYDLR.N + Oxidation (M) |

**No match to:** 841.1960, 841.1960, 842.5637, 855.0995, 871.0715, 882.6186, 882.6186, 893.0596, 909.0323, 915.1290, 915.1290, 927.5462, 947.0018, 1051.7703, 1060.1125, 1060.1126, 1083.1046, 1301.8031, 1301.8031, 1313.8103, 1313.8103, 1325.8025, 1339.7694, 1674.8976, 2005.0609, 2112.1482, 2112.1482, 2212.2224, 2753.4365, 2753.4365

32. [gi|339499150](#) Mass: 28813 Score: 44 Expect: 1.3e+003 Matches: 8

short-chain dehydrogenase/reductase SDR [Treponema caldaria DSM 7334]

| Observed  | Mr(expt)  | Mr(calc)  | ppm    | Start | End | Miss | Ions | Peptide                                     |
|-----------|-----------|-----------|--------|-------|-----|------|------|---------------------------------------------|
| 882.6186  | 881.6113  | 881.5334  | 88.3   | 180   | -   | 187  | 0    | K.SAIHLTK.Y                                 |
| 882.6186  | 881.6113  | 881.5334  | 88.4   | 180   | -   | 187  | 0    | K.SAIHLTK.Y                                 |
| 1169.6356 | 1168.6283 | 1168.7180 | -76.71 | 15    | -   | 27   | 0    | R.IVVVGAGLLGSK.I                            |
| 1169.6356 | 1168.6283 | 1168.7180 | -76.69 | 15    | -   | 27   | 0    | R.IVVVGAGLLGSK.I                            |
| 1325.8025 | 1324.7952 | 1324.8191 | -18.00 | 14    | -   | 27   | 1    | K.RIVVVGAGLLGSK.I                           |
| 1874.0144 | 1873.0071 | 1872.9001 | 57.1   | 163   | -   | 179  | 0    | R.IYDGTAMTPVEYAAIK.S                        |
| 2753.4365 | 2752.4292 | 2752.4179 | 4.11   | 163   | -   | 187  | 1    | R.IYDGTAMTPVEYAAIKSAIHLTK.Y + Oxidation (M) |
| 2753.4365 | 2752.4292 | 2752.4179 | 4.11   | 163   | -   | 187  | 1    | R.IYDGTAMTPVEYAAIKSAIHLTK.Y + Oxidation (M) |

**No match to:** 841.1960, 841.1960, 842.5637, 855.0995, 871.0715, 893.0596, 909.0323, 915.1290, 915.1290, 927.5462, 947.0018, 1051.7703, 1060.1125, 1060.1126, 1083.1046, 1301.8031, 1301.8031, 1313.8103, 1313.8103, 1339.7694, 1674.8976, 2005.0609, 2112.1482, 2112.1482, 2124.1565, 2124.1565, 2151.1111, 2151.1111, 2212.2224

33. [gi|522141702](#) Mass: 27885 Score: 44 Expect: 1.4e+003 Matches: 8



hypothetical protein [Massilia niastensis]

| Observed                                                                                                                                                                                                                                                                                                                    | Mr(expt)  | Mr(calc)  | ppm    | Start | End   | Miss | Ions | Peptide                                      |
|-----------------------------------------------------------------------------------------------------------------------------------------------------------------------------------------------------------------------------------------------------------------------------------------------------------------------------|-----------|-----------|--------|-------|-------|------|------|----------------------------------------------|
| 842.5637                                                                                                                                                                                                                                                                                                                    | 841.5564  | 841.5022  | 64.5   | 145   | - 152 | 0    | ---  | R.AVVGLLDR.M                                 |
| 1313.8103                                                                                                                                                                                                                                                                                                                   | 1312.8030 | 1312.7285 | 56.7   | 145   | - 156 | 1    | ---  | R.AVVGLLDRMSPR.H                             |
| 1313.8103                                                                                                                                                                                                                                                                                                                   | 1312.8030 | 1312.7285 | 56.7   | 145   | - 156 | 1    | ---  | R.AVVGLLDRMSPR.H                             |
| 1674.8976                                                                                                                                                                                                                                                                                                                   | 1673.8903 | 1673.9213 | -18.50 | 138   | - 152 | 1    | ---  | R.YQSQLQRAVVGLLDR.M                          |
| 2124.1565                                                                                                                                                                                                                                                                                                                   | 2123.1492 | 2123.0912 | 27.3   | 3     | - 21  | 1    | ---  | K.HLPPSHGTVIDGQTFRFSK.S                      |
| 2124.1565                                                                                                                                                                                                                                                                                                                   | 2123.1492 | 2123.0912 | 27.3   | 3     | - 21  | 1    | ---  | K.HLPPSHGTVIDGQTFRFSK.S                      |
| 2753.4365                                                                                                                                                                                                                                                                                                                   | 2752.4292 | 2752.4218 | 2.71   | 222   | - 245 | 1    | ---  | R.ILAERSTHFPQMSEPELVLEALAR.L + Oxidation (M) |
| 2753.4365                                                                                                                                                                                                                                                                                                                   | 2752.4292 | 2752.4218 | 2.72   | 222   | - 245 | 1    | ---  | R.ILAERSTHFPQMSEPELVLEALAR.L + Oxidation (M) |
| <b>No match to:</b> 841.1960, 841.1960, 855.0995, 871.0715, 882.6186, 882.6186, 893.0596, 909.0323, 915.1290, 927.5462, 947.0018, 1051.7703, 1060.1125, 1060.1126, 1083.1046, 1169.6356, 1169.6356, 1301.8031, 1301.8031, 1325.8025, 1339.7694, 1874.0144, 2005.0609, 2112.1482, 2112.1482, 2151.1111, 2151.1111, 2212.2224 |           |           |        |       |       |      |      |                                              |

34. [gi|497966698](#) Mass: 29777 Score: 44 Expect: 1.5e+003 Matches: 7

peptide ABC transporter ATP-binding protein [Streptomyces sp. SA3\_actF]

| Observed                                                                                                                                                                                                                                                                                                                              | Mr(expt)  | Mr(calc)  | ppm    | Start | End   | Miss | Ions | Peptide                   |
|---------------------------------------------------------------------------------------------------------------------------------------------------------------------------------------------------------------------------------------------------------------------------------------------------------------------------------------|-----------|-----------|--------|-------|-------|------|------|---------------------------|
| 1301.8031                                                                                                                                                                                                                                                                                                                             | 1300.7958 | 1300.7537 | 32.4   | 155   | - 166 | 1    | ---  | R.VISMVGLLEGR.LK.H        |
| 1301.8031                                                                                                                                                                                                                                                                                                                             | 1300.7958 | 1300.7537 | 32.4   | 155   | - 166 | 1    | ---  | R.VISMVGLLEGR.LK.H        |
| 1874.0144                                                                                                                                                                                                                                                                                                                             | 1873.0071 | 1872.9768 | 16.2   | 2     | - 18  | 0    | ---  | M.ACVAIVPVSQEFPLVTR.L     |
| 2005.0609                                                                                                                                                                                                                                                                                                                             | 2004.0536 | 2004.0173 | 18.1   | 1     | - 18  | 0    | ---  | -MACVAIVPVSQEFPLVTR.L     |
| 2151.1111                                                                                                                                                                                                                                                                                                                             | 2150.1038 | 2150.1888 | -39.54 | 115   | - 133 | 1    | ---  | R.DKIGVFVFQAFNLLPTLTAR.E  |
| 2151.1111                                                                                                                                                                                                                                                                                                                             | 2150.1038 | 2150.1888 | -39.53 | 115   | - 133 | 1    | ---  | R.DKIGVFVFQAFNLLPTLTAR.E  |
| 2212.2224                                                                                                                                                                                                                                                                                                                             | 2211.2151 | 2211.1106 | 47.3   | 241   | - 260 | 1    | ---  | R.VVFLADGRIVDEMHHGPTAER.V |
| <b>No match to:</b> 841.1960, 841.1960, 842.5637, 855.0995, 871.0715, 882.6186, 882.6186, 893.0596, 909.0323, 915.1290, 927.5462, 947.0018, 1051.7703, 1060.1125, 1060.1126, 1083.1046, 1169.6356, 1169.6356, 1301.8031, 1313.8103, 1325.8025, 1339.7694, 1674.8976, 2112.1482, 2112.1482, 2124.1565, 2124.1565, 2753.4365, 2753.4365 |           |           |        |       |       |      |      |                           |

35. [gi|547298347](#) Mass: 24974 Score: 43 Expect: 1.5e+003 Matches: 6

lipoprotein ABC transporter ATP-binding protein LolD [Clostridium hathewayi CAG:224]

| Observed                                                                                                                                                                                                                                                                                                                                         | Mr(expt)  | Mr(calc)  | ppm    | Start | End   | Miss | Ions | Peptide                         |
|--------------------------------------------------------------------------------------------------------------------------------------------------------------------------------------------------------------------------------------------------------------------------------------------------------------------------------------------------|-----------|-----------|--------|-------|-------|------|------|---------------------------------|
| 1169.6356                                                                                                                                                                                                                                                                                                                                        | 1168.6283 | 1168.6889 | -51.86 | 105   | - 114 | 0    | ---  | K.NILMPLLLDK.K                  |
| 1169.6356                                                                                                                                                                                                                                                                                                                                        | 1168.6283 | 1168.6889 | -51.84 | 105   | - 114 | 0    | ---  | K.NILMPLLLDK.K                  |
| 1313.8103                                                                                                                                                                                                                                                                                                                                        | 1312.8030 | 1312.7788 | 18.4   | 105   | - 115 | 1    | ---  | K.NILMPLLLDK.K + Oxidation (M)  |
| 1313.8103                                                                                                                                                                                                                                                                                                                                        | 1312.8030 | 1312.7788 | 18.4   | 104   | - 114 | 1    | ---  | R.KNILMPLLLDK.K + Oxidation (M) |
| 2124.1565                                                                                                                                                                                                                                                                                                                                        | 2123.1492 | 2123.2143 | -30.65 | 86    | - 103 | 1    | ---  | R.KVGLVYQFYNIPTLTVR.K           |
| 2124.1565                                                                                                                                                                                                                                                                                                                                        | 2123.1492 | 2123.2143 | -30.65 | 87    | - 104 | 1    | ---  | K.VGLVYQFYNIPTLTVRK.N           |
| <b>No match to:</b> 841.1960, 841.1960, 842.5637, 855.0995, 871.0715, 882.6186, 882.6186, 893.0596, 909.0323, 915.1290, 927.5462, 947.0018, 1051.7703, 1060.1125, 1060.1126, 1083.1046, 1301.8031, 1301.8031, 1325.8025, 1339.7694, 1674.8976, 1874.0144, 2005.0609, 2112.1482, 2112.1482, 2151.1111, 2151.1111, 2212.2224, 2753.4365, 2753.4365 |           |           |        |       |       |      |      |                                 |

36. [gi|496545606](#) Mass: 25186 Score: 43 Expect: 1.5e+003 Matches: 7

peptide ABC transporter ATP-binding protein [Lachnospiraceae bacterium 3\_1\_57FAA\_CT1]

| Observed                                                                                                                                                                                                                                                                                                                              | Mr(expt)  | Mr(calc)  | ppm    | Start | End   | Miss | Ions | Peptide                         |
|---------------------------------------------------------------------------------------------------------------------------------------------------------------------------------------------------------------------------------------------------------------------------------------------------------------------------------------|-----------|-----------|--------|-------|-------|------|------|---------------------------------|
| 1169.6356                                                                                                                                                                                                                                                                                                                             | 1168.6283 | 1168.6889 | -51.86 | 105   | - 114 | 0    | ---  | K.NILMPLLLDK.R                  |
| 1169.6356                                                                                                                                                                                                                                                                                                                             | 1168.6283 | 1168.6889 | -51.84 | 105   | - 114 | 0    | ---  | K.NILMPLLLDK.R                  |
| 1313.8103                                                                                                                                                                                                                                                                                                                             | 1312.8030 | 1312.7788 | 18.4   | 104   | - 114 | 1    | ---  | R.KNILMPLLLDK.R + Oxidation (M) |
| 1313.8103                                                                                                                                                                                                                                                                                                                             | 1312.8030 | 1312.7788 | 18.4   | 104   | - 114 | 1    | ---  | R.KNILMPLLLDK.R + Oxidation (M) |
| 1325.8025                                                                                                                                                                                                                                                                                                                             | 1324.7952 | 1324.7900 | 3.91   | 105   | - 115 | 1    | ---  | K.NILMPLLLDK.R                  |
| 2124.1565                                                                                                                                                                                                                                                                                                                             | 2123.1492 | 2123.2143 | -30.65 | 86    | - 103 | 1    | ---  | R.KVGLVYQFYNIPTLTVR.K           |
| 2124.1565                                                                                                                                                                                                                                                                                                                             | 2123.1492 | 2123.2143 | -30.65 | 87    | - 104 | 1    | ---  | K.VGLVYQFYNIPTLTVRK.N           |
| <b>No match to:</b> 841.1960, 841.1960, 842.5637, 855.0995, 871.0715, 882.6186, 882.6186, 893.0596, 909.0323, 915.1290, 927.5462, 947.0018, 1051.7703, 1060.1125, 1060.1126, 1083.1046, 1301.8031, 1301.8031, 1339.7694, 1674.8976, 1874.0144, 2005.0609, 2112.1482, 2112.1482, 2151.1111, 2151.1111, 2212.2224, 2753.4365, 2753.4365 |           |           |        |       |       |      |      |                                 |

37. [gi|479202615](#) Mass: 25300 Score: 43 Expect: 1.5e+003 Matches: 7

ABC-type antimicrobial peptide transport system, ATPase component [Roseburia intestinalis M50/1]

| Observed                                                                                                                                                                                                                                                                                                                              | Mr(expt)  | Mr(calc)  | ppm    | Start | End   | Miss | Ions | Peptide                         |
|---------------------------------------------------------------------------------------------------------------------------------------------------------------------------------------------------------------------------------------------------------------------------------------------------------------------------------------|-----------|-----------|--------|-------|-------|------|------|---------------------------------|
| 1169.6356                                                                                                                                                                                                                                                                                                                             | 1168.6283 | 1168.6889 | -51.86 | 105   | - 114 | 0    | ---  | K.NILMPLLLDK.R                  |
| 1169.6356                                                                                                                                                                                                                                                                                                                             | 1168.6283 | 1168.6889 | -51.84 | 105   | - 114 | 0    | ---  | K.NILMPLLLDK.R                  |
| 1313.8103                                                                                                                                                                                                                                                                                                                             | 1312.8030 | 1312.7788 | 18.4   | 104   | - 114 | 1    | ---  | R.KNILMPLLLDK.R + Oxidation (M) |
| 1313.8103                                                                                                                                                                                                                                                                                                                             | 1312.8030 | 1312.7788 | 18.4   | 104   | - 114 | 1    | ---  | R.KNILMPLLLDK.R + Oxidation (M) |
| 1325.8025                                                                                                                                                                                                                                                                                                                             | 1324.7952 | 1324.7900 | 3.91   | 105   | - 115 | 1    | ---  | K.NILMPLLLDK.R                  |
| 2124.1565                                                                                                                                                                                                                                                                                                                             | 2123.1492 | 2123.2143 | -30.65 | 86    | - 103 | 1    | ---  | R.KVGLVYQFYNIPTLTVR.K           |
| 2124.1565                                                                                                                                                                                                                                                                                                                             | 2123.1492 | 2123.2143 | -30.65 | 87    | - 104 | 1    | ---  | K.VGLVYQFYNIPTLTVRK.N           |
| <b>No match to:</b> 841.1960, 841.1960, 842.5637, 855.0995, 871.0715, 882.6186, 882.6186, 893.0596, 909.0323, 915.1290, 927.5462, 947.0018, 1051.7703, 1060.1125, 1060.1126, 1083.1046, 1301.8031, 1301.8031, 1339.7694, 1674.8976, 1874.0144, 2005.0609, 2112.1482, 2112.1482, 2151.1111, 2151.1111, 2212.2224, 2753.4365, 2753.4365 |           |           |        |       |       |      |      |                                 |

38. [gi|296132158](#) Mass: 47550 Score: 43 Expect: 1.5e+003 Matches: 8

respiratory-chain NADH dehydrogenase domain 51 kDa subunit [Thermincola potens JR]

| Observed                                                                                                                                                                                                                                                                                                                   | Mr(expt)  | Mr(calc)  | ppm    | Start | End   | Miss | Ions | Peptide                   |
|----------------------------------------------------------------------------------------------------------------------------------------------------------------------------------------------------------------------------------------------------------------------------------------------------------------------------|-----------|-----------|--------|-------|-------|------|------|---------------------------|
| 1313.8103                                                                                                                                                                                                                                                                                                                  | 1312.8030 | 1312.6921 | 84.5   | 237   | - 247 | 1    | ---  | R.KEITMAHTLNR.A           |
| 1313.8103                                                                                                                                                                                                                                                                                                                  | 1312.8030 | 1312.6921 | 84.5   | 237   | - 247 | 1    | ---  | R.KEITMAHTLNR.A           |
| 1325.8025                                                                                                                                                                                                                                                                                                                  | 1324.7952 | 1324.6874 | 81.4   | 185   | - 196 | 0    | ---  | R.ELVETANVPVEK.Y          |
| 1674.8976                                                                                                                                                                                                                                                                                                                  | 1673.8903 | 1673.8130 | 46.2   | 258   | - 270 | 1    | ---  | K.CTEICPRYLGH.R.M         |
| 1874.0144                                                                                                                                                                                                                                                                                                                  | 1873.0071 | 1873.1149 | -57.53 | 220   | - 236 | 1    | ---  | K.ITKGLIVLPENHSLAR.K      |
| 2151.1111                                                                                                                                                                                                                                                                                                                  | 2150.1038 | 2150.2463 | -66.25 | 355   | - 373 | 1    | ---  | R.LIIRLNLESYNLPAPLSPK.S   |
| 2151.1111                                                                                                                                                                                                                                                                                                                  | 2150.1038 | 2150.2463 | -66.24 | 355   | - 373 | 1    | ---  | R.LIIRLNLESYNLPAPLSPK.S   |
| 2212.2224                                                                                                                                                                                                                                                                                                                  | 2211.2151 | 2211.1279 | 39.4   | 199   | - 219 | 0    | ---  | K.VIEGGPMGMTVLENPKPVT.K.I |
| <b>No match to:</b> 841.1960, 841.1960, 842.5637, 855.0995, 871.0715, 882.6186, 882.6186, 893.0596, 909.0323, 915.1290, 927.5462, 947.0018, 1051.7703, 1060.1125, 1060.1126, 1083.1046, 1169.6356, 1169.6356, 1301.8031, 1301.8031, 1339.7694, 2005.0609, 2112.1482, 2112.1482, 2124.1565, 2124.1565, 2753.4365, 2753.4365 |           |           |        |       |       |      |      |                           |

39. [gi|494243326](#) Mass: 26715 Score: 43 Expect: 1.6e+003 Matches: 7

short-chain dehydrogenase [Methylophaga aminisulfidivorans]

| Observed  | Mr(expt)  | Mr(calc)  | ppm  | Start | End   | Miss | Ions | Peptide                         |
|-----------|-----------|-----------|------|-------|-------|------|------|---------------------------------|
| 927.5462  | 926.5389  | 926.5120  | 29.1 | 14    | - 21  | 1    | ---  | R.VGLHMAKR.F + Oxidation (M)    |
| 1313.8103 | 1312.8030 | 1312.6995 | 78.8 | 154   | - 165 | 0    | ---  | K.AGLHNMMVLAK.K + Oxidation (M) |
| 1313.8103 | 1312.8030 | 1312.6995 | 78.8 | 154   | - 165 | 0    | ---  | K.AGLHNMMVLAK.K + Oxidation (M) |



2124.1565 2123.1492 2123.0647 39.8 173 - 192 0 --- K.VNAVAPGPVLFTEHSDEVR.Q  
 2124.1565 2123.1492 2123.0647 39.8 173 - 192 0 --- K.VNAVAPGPVLFTEHSDEVR.Q  
 2753.4365 2752.4292 2752.4184 3.92 167 - 192 1 --- K.YAPAVKVNAVAPGPVLFTEHSDEVR.Q  
 2753.4365 2752.4292 2752.2432 67.6 35 - 58 1 --- R.TETDGVQEMREMGIIHTIQADFNSK.Q + Oxidation (M)  
**No match to:** 841.1960, 841.1960, 842.5637, 855.0995, 871.0715, 882.6186, 882.6186, 893.0596, 909.0323, 915.1290, 915.1290, 947.0018, 1051.7703, 1060.1125, 1060.1126, 1083.1046, 1169.6356, 1169.6356, 1301.8031, 1301.8031, 1325.8025, 1339.7694, 1674.8976, 1874.0144, 2005.0609, 2112.1482, 2112.1482, 2151.1111, 2151.1111, 2212.2224

40. [gi|491299814](#) Mass: 25459 Score: 43 Expect: 1.7e+003 Matches: 7  
 hypothetical protein [Amycolatopsis azurea]  

| Observed  | Mr(expt)  | Mr(calc)  | ppm    | Start | End | Miss | Ions | Peptide                                    |
|-----------|-----------|-----------|--------|-------|-----|------|------|--------------------------------------------|
| 842.5637  | 841.5564  | 841.5134  | 51.2   | 206   | 212 | 1    | ---  | R.AVVRELR.A                                |
| 1874.0144 | 1873.0071 | 1872.9000 | 57.2   | 46    | 63  | 1    | ---  | R.RQADACDVIVAEGVGDAK.S                     |
| 2112.1482 | 2111.1409 | 2111.2136 | -34.44 | 1     | 19  | 1    | ---  | -.MEIIVSNELGVRVAVLTLR.A                    |
| 2112.1482 | 2111.1409 | 2111.2136 | -34.43 | 1     | 19  | 1    | ---  | -.MEIIVSNELGVRVAVLTLR.A                    |
| 2151.1111 | 2150.1038 | 2150.1095 | -2.66  | 29    | 46  | 1    | ---  | R.LFPMVHIGTQAYFDTVRR.Q                     |
| 2151.1111 | 2150.1038 | 2150.1095 | -2.65  | 29    | 46  | 1    | ---  | R.LFPMVHIGTQAYFDTVRR.Q                     |
| 2212.2224 | 2211.2151 | 2211.1908 | 11.0   | 120   | 139 | 1    | ---  | R.LMMSLLAPTLGVFLRGFGTR.G + 2 Oxidation (M) |

**No match to:** 841.1960, 841.1960, 855.0995, 871.0715, 882.6186, 882.6186, 893.0596, 909.0323, 915.1290, 915.1290, 927.5462, 947.0018, 1051.7703, 1060.1125, 1060.1126, 1083.1046, 1169.6356, 1169.6356, 1301.8031, 1301.8031, 1313.8103, 1313.8103, 1325.8025, 1339.7694, 1674.8976, 2005.0609, 2124.1565, 2124.1565, 2753.4365, 2753.4365

41. [gi|312112921](#) Mass: 46524 Score: 43 Expect: 1.7e+003 Matches: 9  
 lytic murein transglycosylase [Rhodococcus vannielii ATCC 17100]  

| Observed  | Mr(expt)  | Mr(calc)  | ppm  | Start | End | Miss | Ions | Peptide                                |
|-----------|-----------|-----------|------|-------|-----|------|------|----------------------------------------|
| 842.5637  | 841.5564  | 841.5134  | 51.2 | 114   | 121 | 1    | ---  | K.ARQLIGGK.Y                           |
| 1169.6356 | 1168.6283 | 1168.5546 | 63.1 | 162   | 171 | 0    | ---  | R.SLATLAYDCR.R                         |
| 1169.6356 | 1168.6283 | 1168.5546 | 63.1 | 162   | 171 | 0    | ---  | R.SLATLAYDCR.R                         |
| 2005.0609 | 2004.0536 | 2004.0428 | 5.38 | 233   | 251 | 1    | ---  | R.SAPDVIGSSANYLKALGWR.R                |
| 2151.1111 | 2150.1038 | 2150.0103 | 43.5 | 90    | 108 | 1    | ---  | R.GQSVFSQSFLFSDRMAAK.Y + Oxidation (M) |
| 2151.1111 | 2150.1038 | 2150.0103 | 43.5 | 90    | 108 | 1    | ---  | R.GQSVFSQSFLFSDRMAAK.Y + Oxidation (M) |
| 2212.2224 | 2211.2151 | 2211.1899 | 11.4 | 395   | 414 | 1    | ---  | K.VQKKLGLPVDSPYSPDLVSR.L               |
| 2753.4365 | 2752.4292 | 2752.2915 | 50.0 | 262   | 284 | 0    | ---  | R.VPESMDWSQADLTIQHPLSEWQR.M            |
| 2753.4365 | 2752.4292 | 2752.2915 | 50.0 | 262   | 284 | 0    | ---  | R.VPESMDWSQADLTIQHPLSEWQR.M            |

**No match to:** 841.1960, 841.1960, 855.0995, 871.0715, 882.6186, 882.6186, 893.0596, 909.0323, 915.1290, 915.1290, 927.5462, 947.0018, 1051.7703, 1060.1125, 1060.1126, 1083.1046, 1301.8031, 1301.8031, 1313.8103, 1313.8103, 1325.8025, 1339.7694, 1674.8976, 1874.0144, 2112.1482, 2112.1482, 2124.1565, 2124.1565

42. [gi|396482791](#) Mass: 59448 Score: 43 Expect: 1.7e+003 Matches: 5  
 predicted protein [Leptospira maculans JN3]  

| Observed  | Mr(expt)  | Mr(calc)  | ppm   | Start | End | Miss | Ions | Peptide                                 |
|-----------|-----------|-----------|-------|-------|-----|------|------|-----------------------------------------|
| 1169.6356 | 1168.6283 | 1168.6313 | -2.51 | 412   | 423 | 1    | ---  | R.AAVATGRASHTK.Q                        |
| 1169.6356 | 1168.6283 | 1168.6313 | -2.49 | 412   | 423 | 1    | 18   | R.AAVATGRASHTK.Q                        |
| 2212.2224 | 2211.2151 | 2211.1106 | 47.3  | 1     | 20  | 0    | ---  | -.MTLATNSEAKPLASSVWHR.G + Oxidation (M) |
| 2753.4365 | 2752.4292 | 2752.3755 | 19.5  | 113   | 138 | 1    | ---  | R.ELGTGGVGGVLEPAWGLAPCVWRR.A            |
| 2753.4365 | 2752.4292 | 2752.3755 | 19.5  | 112   | 137 | 1    | ---  | R.RELGTGGVGGVLEPAWGLAPCVWR.R            |

**No match to:** 841.1960, 841.1960, 842.5637, 855.0995, 871.0715, 882.6186, 882.6186, 893.0596, 909.0323, 915.1290, 915.1290, 927.5462, 947.0018, 1051.7703, 1060.1125, 1060.1126, 1083.1046, 1301.8031, 1301.8031, 1313.8103, 1313.8103, 1325.8025, 1339.7694, 1674.8976, 1874.0144, 2005.0609, 2112.1482, 2112.1482, 2124.1565, 2124.1565, 2151.1111, 2151.1111

43. [gi|550962788](#) Mass: 10224 Score: 43 Expect: 1.8e+003 Matches: 4  
 hypothetical protein [Pseudochrobactrum sp. A018b]  

| Observed  | Mr(expt)  | Mr(calc)  | ppm    | Start | End | Miss | Ions | Peptide                                     |
|-----------|-----------|-----------|--------|-------|-----|------|------|---------------------------------------------|
| 1169.6356 | 1168.6283 | 1168.6676 | -33.64 | 18    | 28  | 1    | ---  | R.AQLTPSGLARR.A                             |
| 1169.6356 | 1168.6283 | 1168.6676 | -33.62 | 17    | 27  | 1    | ---  | K.RAQLTPSGLAR.R                             |
| 1674.8976 | 1673.8903 | 1673.8413 | 29.3   | 2     | 16  | 0    | ---  | M.FTHAELWSAIDSVAK.R                         |
| 2212.2224 | 2211.2151 | 2211.1167 | 44.5   | 59    | 78  | 0    | ---  | K.ILEVMTAMDVMTFAQLLAGEK.S + 2 Oxidation (M) |

**No match to:** 841.1960, 841.1960, 842.5637, 855.0995, 871.0715, 882.6186, 882.6186, 893.0596, 909.0323, 915.1290, 915.1290, 927.5462, 947.0018, 1051.7703, 1060.1125, 1060.1126, 1083.1046, 1301.8031, 1301.8031, 1313.8103, 1313.8103, 1325.8025, 1339.7694, 1874.0144, 2005.0609, 2112.1482, 2112.1482, 2124.1565, 2124.1565, 2151.1111, 2151.1111, 2753.4365, 2753.4365

44. [gi|297182578](#) Mass: 12830 Score: 43 Expect: 1.8e+003 Matches: 5  
 transposase and inactivated derivatives [uncultured Rhizobiales bacterium HF4000\_32B18]  

| Observed  | Mr(expt)  | Mr(calc)  | ppm  | Start | End | Miss | Ions | Peptide                  |
|-----------|-----------|-----------|------|-------|-----|------|------|--------------------------|
| 1339.7694 | 1338.7621 | 1338.7619 | 0.15 | 22    | 35  | 0    | ---  | K.GIAGLAAAAQEVL.R        |
| 1874.0144 | 1873.0071 | 1872.9556 | 27.5 | 88    | 103 | 0    | ---  | R.LTAAQLAMLWEGIDWR.R     |
| 2005.0609 | 2004.0536 | 2004.0179 | 17.8 | 54    | 69  | 1    | ---  | R.LKLLTWDGQGFCLYK.V      |
| 2151.1111 | 2150.1038 | 2150.0435 | 28.0 | 1     | 20  | 1    | ---  | -.MIGPGTGVRVYLACGPTDMR.K |
| 2151.1111 | 2150.1038 | 2150.0435 | 28.1 | 1     | 20  | 1    | ---  | -.MIGPGTGVRVYLACGPTDMR.K |

**No match to:** 841.1960, 841.1960, 842.5637, 855.0995, 871.0715, 882.6186, 882.6186, 893.0596, 909.0323, 915.1290, 915.1290, 927.5462, 947.0018, 1051.7703, 1060.1125, 1060.1126, 1083.1046, 1169.6356, 1169.6356, 1301.8031, 1301.8031, 1313.8103, 1313.8103, 1325.8025, 1339.7694, 1674.8976, 2005.0609, 2112.1482, 2112.1482, 2124.1565, 2124.1565, 2212.2224, 2753.4365, 2753.4365

45. [gi|341890310](#) Mass: 11784 Score: 43 Expect: 1.9e+003 Matches: 5  
 hypothetical protein CAEBREN\_08480 [Caenorhabditis brenneri]  

| Observed  | Mr(expt)  | Mr(calc)  | ppm  | Start | End | Miss | Ions | Peptide          |
|-----------|-----------|-----------|------|-------|-----|------|------|------------------|
| 842.5637  | 841.5564  | 841.5385  | 21.3 | 65    | 71  | 1    | ---  | K.IAIRIEK.H      |
| 1169.6356 | 1168.6283 | 1168.5836 | 38.2 | 23    | 32  | 0    | ---  | K.IELNHSVDSR.R   |
| 1169.6356 | 1168.6283 | 1168.5836 | 38.3 | 23    | 32  | 0    | ---  | K.IELNHSVDSR.R   |
| 1325.8025 | 1324.7952 | 1324.6847 | 83.4 | 23    | 33  | 1    | ---  | K.IELNHSVDSRR.I  |
| 1339.7694 | 1338.7621 | 1338.6667 | 71.3 | 48    | 59  | 1    | ---  | K.KSSDGFTEDLIK.V |

**No match to:** 841.1960, 841.1960, 855.0995, 871.0715, 882.6186, 882.6186, 893.0596, 909.0323, 915.1290, 915.1290, 927.5462, 947.0018, 1051.7703, 1060.1125, 1060.1126, 1083.1046, 1301.8031, 1301.8031, 1313.8103, 1313.8103, 1674.8976, 1874.0144, 2005.0609, 2112.1482, 2112.1482, 2124.1565, 2124.1565, 2151.1111, 2151.1111, 2212.2224, 2753.4365, 2753.4365

46. [gi|123189376](#) Mass: 27775 Score: 43 Expect: 1.9e+003 Matches: 7  
 hypothetical protein [Trichomonas vaginalis G3]  

| Observed  | Mr(expt)  | Mr(calc)  | ppm  | Start | End | Miss | Ions | Peptide                          |
|-----------|-----------|-----------|------|-------|-----|------|------|----------------------------------|
| 1301.8031 | 1300.7958 | 1300.6744 | 93.4 | 141   | 150 | 1    | ---  | K.DMVMLHLVRR.N + 2 Oxidation (M) |
| 1301.8031 | 1300.7958 | 1300.6744 | 93.4 | 141   | 150 | 1    | ---  | K.DMVMLHLVRR.N + 2 Oxidation (M) |





1874.0144 1873.0071 1872.8750 70.5 2 - 17 0 --- M.YQMQSILTACFAPDTK.L  
 2005.0609 2004.0536 2003.9155 68.9 1 - 17 0 --- -.MYQMQSILTACFAPDTK.L  
 2212.2224 2211.2151 2211.1068 49.0 2 - 20 1 --- M.YQMQSILTACFAPDTKLPK.D  
 2753.4365 2752.4292 2752.3564 26.4 186 - 208 1 --- K.QIVQDTLPQTHYDMKGCITLTFK.E + Oxidation (M)  
 2753.4365 2752.4292 2752.3564 26.4 186 - 208 1 --- K.QIVQDTLPQTHYDMKGCITLTFK.E + Oxidation (M)  
**No match to:** 841.1960, 841.1960, 842.5637, 855.0995, 871.0715, 882.6186, 882.6186, 893.0596, 909.0323, 915.1290, 915.1290, 927.5462, 947.0018, 1051.7703, 1060.1125, 1060.1126, 1083.1046, 1169.6356, 1169.6356, 1313.8103, 1313.8103, 1325.8025, 1339.7694, 1674.8976, 2112.1482, 2112.1482, 2124.1565, 2124.1565, 2151.1111, 2151.1111

47. [gi|493826333](#) Mass: 24992 Score: 42 Expect: 1.9e+003 Matches: 6  
 peptide ABC transporter ATP-binding protein [Clostridium hathewayi]  

| Observed  | Mr(expt)  | Mr(calc)  | ppm    | Start | End   | Miss | Ions | Peptide                         |
|-----------|-----------|-----------|--------|-------|-------|------|------|---------------------------------|
| 1169.6356 | 1168.6283 | 1168.6889 | -51.86 | 105   | - 114 | 0    | ---  | K.NILMPLLLDK.K                  |
| 1169.6356 | 1168.6283 | 1168.6889 | -51.84 | 105   | - 114 | 0    | ---  | K.NILMPLLLDK.K                  |
| 1313.8103 | 1312.8030 | 1312.7788 | 18.4   | 105   | - 115 | 1    | ---  | K.NILMPLLLDKK.S + Oxidation (M) |
| 1313.8103 | 1312.8030 | 1312.7788 | 18.4   | 104   | - 114 | 1    | ---  | R.KNILMPLLLDK.K + Oxidation (M) |
| 2124.1565 | 2123.1492 | 2123.2143 | -30.65 | 86    | - 103 | 1    | ---  | R.KVGLVYQFYNIPTLTVR.K           |
| 2124.1565 | 2123.1492 | 2123.2143 | -30.65 | 87    | - 104 | 1    | ---  | K.VGLVYQFYNIPTLTVR.N            |

**No match to:** 841.1960, 841.1960, 842.5637, 855.0995, 871.0715, 882.6186, 882.6186, 893.0596, 909.0323, 915.1290, 915.1290, 927.5462, 947.0018, 1051.7703, 1060.1125, 1060.1126, 1083.1046, 1301.8031, 1301.8031, 1325.8025, 1339.7694, 1674.8976, 1874.0144, 2005.0609, 2112.1482, 2112.1482, 2151.1111, 2151.1111, 2212.2224, 2753.4365, 2753.4365

48. [gi|332235189](#) Mass: 5332 Score: 42 Expect: 1.9e+003 Matches: 3  
 PREDICTED: protein phosphatase 1 regulatory subunit 14D [Nomascus leucogenys]  

| Observed  | Mr(expt)  | Mr(calc)  | ppm  | Start | End  | Miss | Ions | Peptide                 |
|-----------|-----------|-----------|------|-------|------|------|------|-------------------------|
| 1874.0144 | 1873.0071 | 1872.9792 | 14.9 | 2     | - 17 | 1    | ---  | M.DLSTEEQKTQLEAILR.N    |
| 2005.0609 | 2004.0536 | 2004.0197 | 16.9 | 1     | - 17 | 1    | ---  | -.MDLSTEEQKTQLEAILR.N   |
| 2212.2224 | 2211.2151 | 2211.1358 | 35.9 | 18    | - 36 | 1    | ---  | R.NCPHPTFAFISELLSQLKK.L |

**No match to:** 841.1960, 841.1960, 842.5637, 855.0995, 871.0715, 882.6186, 882.6186, 893.0596, 909.0323, 915.1290, 915.1290, 927.5462, 947.0018, 1051.7703, 1060.1125, 1060.1126, 1083.1046, 1169.6356, 1169.6356, 1301.8031, 1301.8031, 1313.8103, 1313.8103, 1325.8025, 1339.7694, 1674.8976, 2112.1482, 2112.1482, 2124.1565, 2124.1565, 2151.1111, 2151.1111, 2753.4365, 2753.4365

49. [gi|520945468](#) Mass: 15697 Score: 42 Expect: 1.9e+003 Matches: 7  
 LysR family transcriptional regulator, partial [Pseudomonas syringae]  

| Observed  | Mr(expt)  | Mr(calc)  | ppm  | Start | End   | Miss | Ions | Peptide                  |
|-----------|-----------|-----------|------|-------|-------|------|------|--------------------------|
| 1169.6356 | 1168.6283 | 1168.5665 | 52.9 | 129   | - 138 | 0    | ---  | R.EYFAVHHAPV.-           |
| 1169.6356 | 1168.6283 | 1168.5665 | 52.9 | 129   | - 138 | 0    | ---  | R.EYFAVHHAPV.-           |
| 1313.8103 | 1312.8030 | 1312.7616 | 31.6 | 75    | - 85  | 1    | ---  | R.GVLLRSLWDVR.T          |
| 1313.8103 | 1312.8030 | 1312.7616 | 31.6 | 75    | - 85  | 1    | ---  | R.GVLLRSLWDVR.T          |
| 2112.1482 | 2111.1409 | 2111.0548 | 40.8 | 35    | - 53  | 0    | ---  | R.DRPFGIWHLNGSQGAETVK.V  |
| 2112.1482 | 2111.1409 | 2111.0548 | 40.8 | 35    | - 53  | 0    | ---  | R.DRPFGIWHLNGSQGAETVK.V  |
| 2212.2224 | 2211.2151 | 2211.1106 | 47.3 | 102   | - 121 | 1    | ---  | R.QDADIWAVHTSPLMSSAKVR.V |

**No match to:** 841.1960, 841.1960, 842.5637, 855.0995, 871.0715, 882.6186, 882.6186, 893.0596, 909.0323, 915.1290, 915.1290, 927.5462, 947.0018, 1051.7703, 1060.1125, 1060.1126, 1083.1046, 1301.8031, 1301.8031, 1325.8025, 1339.7694, 1674.8976, 1874.0144, 2005.0609, 2124.1565, 2124.1565, 2151.1111, 2151.1111, 2753.4365, 2753.4365

50. [gi|486208296](#) Mass: 4883 Score: 42 Expect: 2e+003 Matches: 4  
 hypothetical protein [Escherichia coli]  

| Observed  | Mr(expt)  | Mr(calc)  | ppm  | Start | End  | Miss | Ions | Peptide                                |
|-----------|-----------|-----------|------|-------|------|------|------|----------------------------------------|
| 1325.8025 | 1324.7952 | 1324.7714 | 18.0 | 5     | - 17 | 0    | ---  | R.NINVITALSVPGK.T                      |
| 1874.0144 | 1873.0071 | 1872.9913 | 8.42 | 1     | - 17 | 1    | ---  | -.MNMNRNINVITALSVPGK.T + Oxidation (M) |
| 2753.4365 | 2752.4292 | 2752.4218 | 2.70 | 18    | - 42 | 1    | ---  | K.TVSDDFIHAVLSNCATRIVLPAPEK.F          |
| 2753.4365 | 2752.4292 | 2752.4218 | 2.70 | 18    | - 42 | 1    | ---  | K.TVSDDFIHAVLSNCATRIVLPAPEK.F          |

**No match to:** 841.1960, 841.1960, 842.5637, 855.0995, 871.0715, 882.6186, 882.6186, 893.0596, 909.0323, 915.1290, 915.1290, 927.5462, 947.0018, 1051.7703, 1060.1125, 1060.1126, 1083.1046, 1169.6356, 1169.6356, 1301.8031, 1301.8031, 1313.8103, 1313.8103, 1339.7694, 1674.8976, 2005.0609, 2112.1482, 2112.1482, 2124.1565, 2124.1565, 2151.1111, 2151.1111, 2212.2224

## Search Parameters

Type of search : Sequence Query  
 Enzyme : Trypsin  
 Fixed modifications : [Carbamidomethyl \(C\)](#)  
 Variable modifications : [Oxidation \(M\)](#)  
 Mass values : Monoisotopic  
 Protein Mass : Unrestricted  
 Peptide Mass Tolerance :  $\pm 100$  ppm  
 Fragment Mass Tolerance :  $\pm 0.3$  Da  
 Max Missed Cleavages : 1  
 Instrument type : MALDI-TOF-TOF  
 Query1 (841.1960,1+) : Locus:1..5.0.4  
 Query2 (841.1960,1+) : <no title>  
 Query3 (842.5637,1+) : <no title>  
 Query4 (855.0995,1+) : <no title>  
 Query5 (871.0715,1+) : <no title>  
 Query6 (882.6186,1+) : Locus:1..5.0.7  
 Query7 (882.6186,1+) : <no title>  
 Query8 (893.0596,1+) : <no title>  
 Query9 (909.0323,1+) : <no title>  
 Query10 (915.1290,1+) : Locus:1..5.0.12  
 Query11 (915.1290,1+) : <no title>  
 Query12 (927.5462,1+) : <no title>  
 Query13 (947.0018,1+) : <no title>  
 Query14 (1051.7703,1+) : <no title>  
 Query15 (1060.1125,1+) : <no title>  
 Query16 (1060.1126,1+) : Locus:1..5.0.6  
 Query17 (1083.1046,1+) : <no title>  
 Query18 (1169.6356,1+) : <no title>  
 Query19 (1169.6356,1+) : Locus:1..5.0.5  
 Query20 (1301.8031,1+) : <no title>  
 Query21 (1301.8031,1+) : Locus:1..5.0.1  
 Query22 (1313.8103,1+) : <no title>  
 Query23 (1313.8103,1+) : Locus:1..5.0.9  
 Query24 (1325.8025,1+) : <no title>

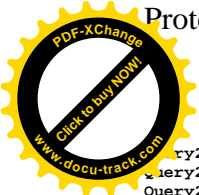

Query25 (1339.7694,1+) : <no title>  
Query26 (1674.8976,1+) : <no title>  
Query27 (1874.0144,1+) : <no title>  
Query28 (2005.0609,1+) : <no title>  
Query29 (2112.1482,1+) : Locus:1..5.0.2  
Query30 (2112.1482,1+) : <no title>  
Query31 (2124.1565,1+) : Locus:1..5.0.10  
Query32 (2124.1565,1+) : <no title>  
Query33 (2151.1111,1+) : Locus:1..5.0.3  
Query34 (2151.1111,1+) : <no title>  
Query35 (2212.2224,1+) : <no title>  
Query36 (2753.4365,1+) : <no title>  
Query37 (2753.4365,1+) : Locus:1..5.0.8

Mascot: <http://www.matrixscience.com/>
