# Supplementary material for: Alpha-2-Macroglobulin as a New Promising Biomarker Improving the Diagnostic Sensitivity of Bovine Paratuberculosis
Source: Frontiers journal article supplement (doi:10.3389/fvets.2021.637716), 2021-03-05
Supplement: Data_Sheet_1.zip [file Data_Sheet_1.zip]

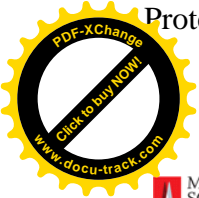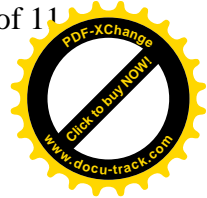

MATRIX SCIENCE Mascot Search Results

User :  
Email :  
Search title : BAEDW\2020\_3\_5\2020\_3\_5\MSMS 14\N20  
Database : Uniprot\_bovine bovine\_20200316 (134392 sequences; 76244912 residues)  
Timestamp : 31 Mar 2020 at 01:09:00 GMT  
Warning : A Peptide summary report will usually give a much clearer picture of MS/MS search results.  
Top Score : 283 for V6F7X3, Apolipoprotein A-IV OS=Bos taurus OX=9913 GN=APOA4 PE=3 SV=1

Mascot Score Histogram

Protein score is  $-10 \cdot \log(P)$ , where P is the probability that the observed match is a random event.  
Protein scores greater than 64 are significant ( $p < 0.05$ ).  
Protein scores are derived from ion scores as a non-probabilistic basis for ranking protein hits.

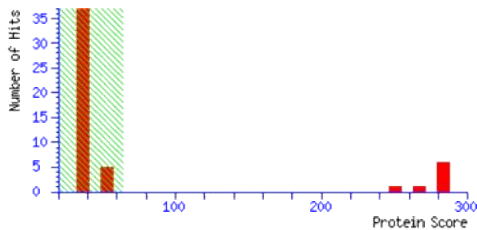

Protein Summary Report

Format As Protein Summary (deprecated) [Help](#)  
Significance threshold  $p < 0.05$  Max. number of hits 30  
Preferred taxonomy All entries  
Re-Search All Search Unmatched

Index

| Accession                      | Mass   | Score | Description                                                                                               |
|--------------------------------|--------|-------|-----------------------------------------------------------------------------------------------------------|
| 1. <a href="#">V6F7X3</a>      | 42963  | 283   | Apolipoprotein A-IV OS=Bos taurus OX=9913 GN=APOA4 PE=3 SV=1                                              |
| 2. <a href="#">A0A4W2CCP9</a>  | 42963  | 283   | Apolipoprotein A4 OS=Bos indicus x Bos taurus OX=30522 GN=APOA4 PE=3 SV=1                                 |
| 3. <a href="#">A0A3Q1M3N0</a>  | 43165  | 283   | Apolipoprotein A-IV OS=Bos taurus OX=9913 GN=APOA4 PE=3 SV=1                                              |
| 4. <a href="#">A0A3Q1MZJ9</a>  | 45782  | 282   | Apolipoprotein A-IV OS=Bos taurus OX=9913 GN=APOA4 PE=3 SV=1                                              |
| 5. <a href="#">A0A4W2GRG6</a>  | 43654  | 281   | Apolipoprotein A4 OS=Bos indicus x Bos taurus OX=30522 GN=APOA4 PE=3 SV=1                                 |
| 6. <a href="#">A0A4W2GSL9</a>  | 46566  | 279   | Apolipoprotein A4 OS=Bos indicus x Bos taurus OX=30522 GN=APOA4 PE=3 SV=1                                 |
| 7. <a href="#">F1N3Q7</a>      | 52487  | 271   | Apolipoprotein A-IV OS=Bos taurus OX=9913 GN=APOA4 PE=3 SV=2                                              |
| 8. <a href="#">Q32PJ2</a>      | 42991  | 248   | Apolipoprotein A-IV OS=Bos taurus OX=9913 GN=APOA4 PE=2 SV=1                                              |
| 9. <a href="#">F1N6W4</a>      | 145999 | 48    | DENN domain containing 5A OS=Bos taurus OX=9913 GN=DENN5A PE=4 SV=3                                       |
| 10. <a href="#">A0A3Q1MUN3</a> | 148571 | 48    | DENN domain containing 5A OS=Bos taurus OX=9913 GN=DENN5A PE=4 SV=1                                       |
| 11. <a href="#">A0A4W2DBN8</a> | 47465  | 46    | Reverse transcriptase domain-containing protein OS=Bos indicus x Bos taurus OX=30522 PE=4 SV=1            |
| 12. <a href="#">A0A4W2FJP8</a> | 473166 | 45    | Dynein axonemal heavy chain 6 OS=Bos indicus x Bos taurus OX=30522 GN=DNAH6 PE=4 SV=1                     |
| 13. <a href="#">A0A4W2HIT4</a> | 478985 | 45    | Dynein axonemal heavy chain 6 OS=Bos indicus x Bos taurus OX=30522 GN=DNAH6 PE=4 SV=1                     |
| 14. <a href="#">A0A3Q1LWT9</a> | 14058  | 44    | Uncharacterized protein OS=Bos taurus OX=9913 PE=4 SV=1                                                   |
| 15. <a href="#">A0A4W2DIE4</a> | 14058  | 44    | Uncharacterized protein OS=Bos indicus x Bos taurus OX=30522 PE=4 SV=1                                    |
| 16. <a href="#">A0A4W2EFU9</a> | 24150  | 44    | Hypoxanthine phosphoribosyltransferase OS=Bos indicus x Bos taurus OX=30522 PE=3 SV=1                     |
| 17. <a href="#">E1BA06</a>     | 24150  | 44    | Hypoxanthine phosphoribosyltransferase OS=Bos taurus OX=9913 PE=3 SV=2                                    |
| 18. <a href="#">A0A4W2HDP5</a> | 60337  | 43    | Zinc finger protein 382 OS=Bos indicus x Bos taurus OX=30522 GN=ZNF382 PE=4 SV=1                          |
| 19. <a href="#">A0A4W2FFL4</a> | 343058 | 43    | Kalirin RhoGEF kinase OS=Bos indicus x Bos taurus OX=30522 GN=KALRN PE=4 SV=1                             |
| 20. <a href="#">A0A4W2EN51</a> | 85445  | 43    | Cyclin and CBS domain divalent metal cation transport mediator 4 OS=Bos indicus x Bos taurus OX=30522 GN= |
| 21. <a href="#">A0A4W2F426</a> | 60709  | 42    | Uncharacterized protein OS=Bos indicus x Bos taurus OX=30522 PE=4 SV=1                                    |
| 22. <a href="#">A0A4W2HZ94</a> | 170798 | 42    | Lysine demethylase 2B OS=Bos indicus x Bos taurus OX=30522 GN=KDM2B PE=4 SV=1                             |
| 23. <a href="#">A0A3Q1MCG0</a> | 472745 | 42    | Dynein axonemal heavy chain 6 OS=Bos taurus OX=9913 GN=DNAH6 PE=4 SV=1                                    |
| 24. <a href="#">A0A4W2GJX2</a> | 108528 | 40    | Nebulette OS=Bos indicus x Bos taurus OX=30522 GN=NEBL PE=4 SV=1                                          |
| 25. <a href="#">A0A4W2EA29</a> | 473215 | 40    | Dynein axonemal heavy chain 6 OS=Bos indicus x Bos taurus OX=30522 GN=DNAH6 PE=4 SV=1                     |
| 26. <a href="#">A0A4W2CJR0</a> | 108457 | 40    | Nebulette OS=Bos indicus x Bos taurus OX=30522 GN=NEBL PE=4 SV=1                                          |
| 27. <a href="#">A0A3Q1MXR2</a> | 108457 | 40    | Nebulette OS=Bos taurus OX=9913 GN=NEBL PE=4 SV=1                                                         |
| 28. <a href="#">A0A4W2GHX5</a> | 112926 | 40    | Nebulette OS=Bos indicus x Bos taurus OX=30522 GN=NEBL PE=4 SV=1                                          |
| 29. <a href="#">A0A4W2CVR3</a> | 479034 | 40    | Dynein axonemal heavy chain 6 OS=Bos indicus x Bos taurus OX=30522 GN=DNAH6 PE=4 SV=1                     |
| 30. <a href="#">A0A4W2I420</a> | 167724 | 40    | Lysine demethylase 2B OS=Bos indicus x Bos taurus OX=30522 GN=KDM2B PE=4 SV=1                             |

Results List

| 1.                                                           | <a href="#">V6F7X3</a> | Mass: 42963 | Score: 283 | Expect: 6.7e-024 | Matches: 24 |      |      |                                |
|--------------------------------------------------------------|------------------------|-------------|------------|------------------|-------------|------|------|--------------------------------|
| Apolipoprotein A-IV OS=Bos taurus OX=9913 GN=APOA4 PE=3 SV=1 |                        |             |            |                  |             |      |      |                                |
| Observed                                                     | Mr (expt)              | Mr (calc)   | ppm        | Start            | End         | Miss | Ions | Peptide                        |
| 862.4257                                                     | 861.4184               | 861.4556    | -43.12     | 288              | 295         | 0    | ---  | K.SLAELSSR.L                   |
| 977.4595                                                     | 976.4522               | 976.4978    | -46.64     | 156              | 163         | 0    | ---  | R.QLTPYAER.M                   |
| 977.4595                                                     | 976.4523               | 976.4978    | -46.61     | 156              | 163         | 0    | 15   | R.QLTPYAER.M                   |
| 1047.4978                                                    | 1046.4905              | 1046.5396   | -46.92     | 135              | 143         | 0    | ---  | R.LGPYAEELR.T                  |
| 1047.4978                                                    | 1046.4905              | 1046.5396   | -46.92     | 135              | 143         | 0    | 20   | R.LGPYAEELR.T                  |
| 1133.5562                                                    | 1132.5489              | 1132.5989   | -44.10     | 155              | 163         | 1    | ---  | R.RQLTPYAER.M                  |
| 1149.5057                                                    | 1148.4984              | 1148.5462   | -41.60     | 296              | 304         | 0    | ---  | R.LDQQVEDFR.R                  |
| 1149.5057                                                    | 1148.4985              | 1148.5462   | -41.57     | 296              | 304         | 0    | 20   | R.LDQQVEDFR.R                  |
| 1174.5699                                                    | 1173.5626              | 1173.6176   | -46.83     | 317              | 326         | 0    | ---  | K.AMVQQLDTLR.Q                 |
| 1174.5700                                                    | 1173.5627              | 1173.6176   | -46.79     | 317              | 326         | 0    | 50   | K.AMVQQLDTLR.Q                 |
| 1190.5620                                                    | 1189.5547              | 1189.6125   | -48.57     | 317              | 326         | 0    | ---  | K.AMVQQLDTLR.Q + Oxidation (M) |
| 1212.5294                                                    | 1211.5221              | 1211.5823   | -49.63     | 306              | 316         | 0    | ---  | R.TVGPYGETFNK.A                |
| 1277.6251                                                    | 1276.6178              | 1276.6663   | -37.98     | 201              | 211         | 0    | ---  | R.LTPYADQLQTK.I                |
| 1287.6068                                                    | 1286.5995              | 1286.6579   | -45.36     | 144              | 154         | 0    | ---  | R.TQVDTQAQQLR.R                |
| 1287.6068                                                    | 1286.5995              | 1286.6579   | -45.35     | 144              | 154         | 0    | 14   | R.TQVDTQAQQLR.R                |
| 1305.5947                                                    | 1304.5874              | 1304.6473   | -45.90     | 296              | 305         | 1    | ---  | R.LDQQVEDFRR.T                 |

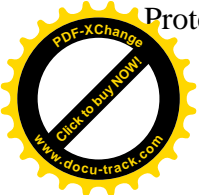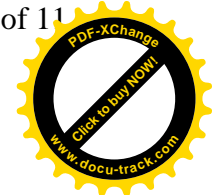

1311.6462 1310.6389 1310.6983 -45.28 80 - 90 0 --- K.LVPFATELHER.L  
 1311.6462 1310.6390 1310.6983 -45.25 80 - 90 0 14 K.LVPFATELHER.L  
 1439.7417 1438.7344 1438.7932 -40.87 79 - 90 1 --- K.KLVFPATELHER.L  
 1528.7235 1527.7162 1527.7868 -46.17 234 - 246 0 --- K.LNHQLEGLAFQMK.K  
 1664.7775 1663.7702 1663.8417 -42.96 52 - 65 0 --- K.SELTQQLNTLFPQDK.L  
 1839.8657 1838.8584 1838.9414 -45.13 329 - 345 0 --- K.LGPLAGDVEDHLSFLEK.D  
 2700.2822 2699.2749 2699.3514 -28.34 170 - 193 0 --- R.QNLDQLQASLAPYAEELQATVNQR.V  
 2700.2822 2699.2750 2699.3514 -28.33 170 - 193 0 36 R.QNLDQLQASLAPYAEELQATVNQR.V  
**No match to:** 834.4748, 842.4698, 848.4878, 850.0129, 850.4987, 853.4788, 864.5128, 865.9851, 868.5118, 870.5065, 876.9959, 882.5245, 882.5245, 892.9658, 951.5779, 960.4399, 996.5483, 1017.6229, 1017.6229, 1019.6358, 1033.6520, 1045.5190, 1051.6609, 1069.4803, 1131.6592, 1151.6812, 1156.5675, 1165.6880, 1165.6880, 1179.5543, 1182.6278, 1182.6278, 1194.5756, 1269.6084, 1300.7948, 1334.8268, 1425.6982, 1448.8599, 1475.6879, 1617.9976, 1691.7629, 1695.6990, 1702.7892, 1732.0278, 1880.9835, 1901.1722, 1904.9435, 2015.2070, 2211.0264, 2283.1013, 2682.3079, 2683.2788

2. [A0A4W2CCP9](#) Mass: 42963 Score: 283 Expect: 6.7e-024 Matches: 24

Apolipoprotein A4 OS=Bos indicus x Bos taurus OX=30522 GN=APOA4 PE=3 SV=1

| Observed                                                                                                                                                                                                                                                                                                                                                                                                                                                                                                                                                                                      | Mr(expt)  | Mr(calc)  | ppm    | Start | End | Miss | Ions | Peptide                        |
|-----------------------------------------------------------------------------------------------------------------------------------------------------------------------------------------------------------------------------------------------------------------------------------------------------------------------------------------------------------------------------------------------------------------------------------------------------------------------------------------------------------------------------------------------------------------------------------------------|-----------|-----------|--------|-------|-----|------|------|--------------------------------|
| 862.4257                                                                                                                                                                                                                                                                                                                                                                                                                                                                                                                                                                                      | 861.4184  | 861.4556  | -43.12 | 288   | 295 | 0    | ---  | K.SLAELSSR.L                   |
| 977.4595                                                                                                                                                                                                                                                                                                                                                                                                                                                                                                                                                                                      | 976.4522  | 976.4978  | -46.64 | 156   | 163 | 0    | ---  | R.QLTPYAEER.M                  |
| 977.4595                                                                                                                                                                                                                                                                                                                                                                                                                                                                                                                                                                                      | 976.4523  | 976.4978  | -46.61 | 156   | 163 | 0    | 15   | R.QLTPYAEER.M                  |
| 1047.4978                                                                                                                                                                                                                                                                                                                                                                                                                                                                                                                                                                                     | 1046.4905 | 1046.5396 | -46.92 | 135   | 143 | 0    | ---  | R.LGPYAEELR.T                  |
| 1047.4978                                                                                                                                                                                                                                                                                                                                                                                                                                                                                                                                                                                     | 1046.4905 | 1046.5396 | -46.92 | 135   | 143 | 0    | 20   | R.LGPYAEELR.T                  |
| 1133.5562                                                                                                                                                                                                                                                                                                                                                                                                                                                                                                                                                                                     | 1132.5489 | 1132.5989 | -44.10 | 155   | 163 | 1    | ---  | R.RQLTPYAEER.M                 |
| 1149.5057                                                                                                                                                                                                                                                                                                                                                                                                                                                                                                                                                                                     | 1148.4984 | 1148.5462 | -41.60 | 296   | 304 | 0    | ---  | R.LDQQVEDFR.R                  |
| 1149.5057                                                                                                                                                                                                                                                                                                                                                                                                                                                                                                                                                                                     | 1148.4985 | 1148.5462 | -41.57 | 296   | 304 | 0    | 20   | R.LDQQVEDFR.R                  |
| 1174.5699                                                                                                                                                                                                                                                                                                                                                                                                                                                                                                                                                                                     | 1173.5626 | 1173.6176 | -46.83 | 317   | 326 | 0    | ---  | K.AMVQQLDTLR.Q                 |
| 1174.5700                                                                                                                                                                                                                                                                                                                                                                                                                                                                                                                                                                                     | 1173.5627 | 1173.6176 | -46.79 | 317   | 326 | 0    | 50   | K.AMVQQLDTLR.Q                 |
| 1190.5620                                                                                                                                                                                                                                                                                                                                                                                                                                                                                                                                                                                     | 1189.5547 | 1189.6125 | -48.57 | 317   | 326 | 0    | ---  | K.AMVQQLDTLR.Q + Oxidation (M) |
| 1212.5294                                                                                                                                                                                                                                                                                                                                                                                                                                                                                                                                                                                     | 1211.5221 | 1211.5823 | -49.63 | 306   | 316 | 0    | ---  | R.TVGPYGETFNK.A                |
| 1277.6251                                                                                                                                                                                                                                                                                                                                                                                                                                                                                                                                                                                     | 1276.6178 | 1276.6663 | -37.98 | 201   | 211 | 0    | ---  | R.LTPYADQLQTK.I                |
| 1287.6068                                                                                                                                                                                                                                                                                                                                                                                                                                                                                                                                                                                     | 1286.5995 | 1286.6579 | -45.36 | 144   | 154 | 0    | ---  | R.TQVDTQAQQLR.R                |
| 1287.6068                                                                                                                                                                                                                                                                                                                                                                                                                                                                                                                                                                                     | 1286.5995 | 1286.6579 | -45.35 | 144   | 154 | 0    | 14   | R.TQVDTQAQQLR.R                |
| 1305.5947                                                                                                                                                                                                                                                                                                                                                                                                                                                                                                                                                                                     | 1304.5874 | 1304.6473 | -45.90 | 296   | 305 | 1    | ---  | R.LDQQVEDFR.R                  |
| 1311.6462                                                                                                                                                                                                                                                                                                                                                                                                                                                                                                                                                                                     | 1310.6389 | 1310.6983 | -45.28 | 80    | 90  | 0    | ---  | K.LVPFATELHER.L                |
| 1311.6462                                                                                                                                                                                                                                                                                                                                                                                                                                                                                                                                                                                     | 1310.6390 | 1310.6983 | -45.25 | 80    | 90  | 0    | 14   | K.LVPFATELHER.L                |
| 1439.7417                                                                                                                                                                                                                                                                                                                                                                                                                                                                                                                                                                                     | 1438.7344 | 1438.7932 | -40.87 | 79    | 90  | 1    | ---  | K.KLVFPATELHER.L               |
| 1528.7235                                                                                                                                                                                                                                                                                                                                                                                                                                                                                                                                                                                     | 1527.7162 | 1527.7868 | -46.17 | 234   | 246 | 0    | ---  | K.LNHQLEGLAFQMK.K              |
| 1664.7775                                                                                                                                                                                                                                                                                                                                                                                                                                                                                                                                                                                     | 1663.7702 | 1663.8417 | -42.96 | 52    | 65  | 0    | ---  | K.SELTQQLNTLFPQDK.L            |
| 1839.8657                                                                                                                                                                                                                                                                                                                                                                                                                                                                                                                                                                                     | 1838.8584 | 1838.9414 | -45.13 | 329   | 345 | 0    | ---  | K.LGPLAGDVEDHLSFLEK.D          |
| 2700.2822                                                                                                                                                                                                                                                                                                                                                                                                                                                                                                                                                                                     | 2699.2749 | 2699.3514 | -28.34 | 170   | 193 | 0    | ---  | R.QNLDQLQASLAPYAEELQATVNQR.V   |
| 2700.2822                                                                                                                                                                                                                                                                                                                                                                                                                                                                                                                                                                                     | 2699.2750 | 2699.3514 | -28.33 | 170   | 193 | 0    | 36   | R.QNLDQLQASLAPYAEELQATVNQR.V   |
| <b>No match to:</b> 834.4748, 842.4698, 848.4878, 850.0129, 850.4987, 853.4788, 864.5128, 865.9851, 868.5118, 870.5065, 876.9959, 882.5245, 882.5245, 892.9658, 951.5779, 960.4399, 996.5483, 1017.6229, 1017.6229, 1019.6358, 1033.6520, 1045.5190, 1051.6609, 1069.4803, 1131.6592, 1151.6812, 1156.5675, 1165.6880, 1165.6880, 1179.5543, 1182.6278, 1182.6278, 1194.5756, 1269.6084, 1300.7948, 1334.8268, 1425.6982, 1448.8599, 1475.6879, 1617.9976, 1691.7629, 1695.6990, 1702.7892, 1732.0278, 1880.9835, 1901.1722, 1904.9435, 2015.2070, 2211.0264, 2283.1013, 2682.3079, 2683.2788 |           |           |        |       |     |      |      |                                |

3. [A0A3Q1M3N0](#) Mass: 43165 Score: 283 Expect: 6.7e-024 Matches: 24

Apolipoprotein A-IV OS=Bos taurus OX=9913 GN=APOA4 PE=3 SV=1

| Observed                                                                                                                                                                                                                                                                                                                                                                                                                                                                                                                                                                                      | Mr(expt)  | Mr(calc)  | ppm    | Start | End | Miss | Ions | Peptide                        |
|-----------------------------------------------------------------------------------------------------------------------------------------------------------------------------------------------------------------------------------------------------------------------------------------------------------------------------------------------------------------------------------------------------------------------------------------------------------------------------------------------------------------------------------------------------------------------------------------------|-----------|-----------|--------|-------|-----|------|------|--------------------------------|
| 862.4257                                                                                                                                                                                                                                                                                                                                                                                                                                                                                                                                                                                      | 861.4184  | 861.4556  | -43.12 | 313   | 320 | 0    | ---  | K.SLAELSSR.L                   |
| 977.4595                                                                                                                                                                                                                                                                                                                                                                                                                                                                                                                                                                                      | 976.4522  | 976.4978  | -46.64 | 181   | 188 | 0    | ---  | R.QLTPYAEER.M                  |
| 977.4595                                                                                                                                                                                                                                                                                                                                                                                                                                                                                                                                                                                      | 976.4523  | 976.4978  | -46.61 | 181   | 188 | 0    | 15   | R.QLTPYAEER.M                  |
| 1047.4978                                                                                                                                                                                                                                                                                                                                                                                                                                                                                                                                                                                     | 1046.4905 | 1046.5396 | -46.92 | 160   | 168 | 0    | ---  | R.LGPYAEELR.T                  |
| 1047.4978                                                                                                                                                                                                                                                                                                                                                                                                                                                                                                                                                                                     | 1046.4905 | 1046.5396 | -46.92 | 160   | 168 | 0    | 20   | R.LGPYAEELR.T                  |
| 1133.5562                                                                                                                                                                                                                                                                                                                                                                                                                                                                                                                                                                                     | 1132.5489 | 1132.5989 | -44.10 | 180   | 188 | 1    | ---  | R.RQLTPYAEER.M                 |
| 1149.5057                                                                                                                                                                                                                                                                                                                                                                                                                                                                                                                                                                                     | 1148.4984 | 1148.5462 | -41.60 | 321   | 329 | 0    | ---  | R.LDQQVEDFR.R                  |
| 1149.5057                                                                                                                                                                                                                                                                                                                                                                                                                                                                                                                                                                                     | 1148.4985 | 1148.5462 | -41.57 | 321   | 329 | 0    | 20   | R.LDQQVEDFR.R                  |
| 1174.5699                                                                                                                                                                                                                                                                                                                                                                                                                                                                                                                                                                                     | 1173.5626 | 1173.6176 | -46.83 | 342   | 351 | 0    | ---  | K.AMVQQLDTLR.Q                 |
| 1174.5700                                                                                                                                                                                                                                                                                                                                                                                                                                                                                                                                                                                     | 1173.5627 | 1173.6176 | -46.79 | 342   | 351 | 0    | 50   | K.AMVQQLDTLR.Q                 |
| 1190.5620                                                                                                                                                                                                                                                                                                                                                                                                                                                                                                                                                                                     | 1189.5547 | 1189.6125 | -48.57 | 342   | 351 | 0    | ---  | K.AMVQQLDTLR.Q + Oxidation (M) |
| 1212.5294                                                                                                                                                                                                                                                                                                                                                                                                                                                                                                                                                                                     | 1211.5221 | 1211.5823 | -49.63 | 331   | 341 | 0    | ---  | R.TVGPYGETFNK.A                |
| 1277.6251                                                                                                                                                                                                                                                                                                                                                                                                                                                                                                                                                                                     | 1276.6178 | 1276.6663 | -37.98 | 226   | 236 | 0    | ---  | R.LTPYADQLQTK.I                |
| 1287.6068                                                                                                                                                                                                                                                                                                                                                                                                                                                                                                                                                                                     | 1286.5995 | 1286.6579 | -45.36 | 169   | 179 | 0    | ---  | R.TQVDTQAQQLR.R                |
| 1287.6068                                                                                                                                                                                                                                                                                                                                                                                                                                                                                                                                                                                     | 1286.5995 | 1286.6579 | -45.35 | 169   | 179 | 0    | 14   | R.TQVDTQAQQLR.R                |
| 1305.5947                                                                                                                                                                                                                                                                                                                                                                                                                                                                                                                                                                                     | 1304.5874 | 1304.6473 | -45.90 | 321   | 330 | 1    | ---  | R.LDQQVEDFR.R                  |
| 1311.6462                                                                                                                                                                                                                                                                                                                                                                                                                                                                                                                                                                                     | 1310.6389 | 1310.6983 | -45.28 | 105   | 115 | 0    | ---  | K.LVPFATELHER.L                |
| 1311.6462                                                                                                                                                                                                                                                                                                                                                                                                                                                                                                                                                                                     | 1310.6390 | 1310.6983 | -45.25 | 105   | 115 | 0    | 14   | K.LVPFATELHER.L                |
| 1439.7417                                                                                                                                                                                                                                                                                                                                                                                                                                                                                                                                                                                     | 1438.7344 | 1438.7932 | -40.87 | 104   | 115 | 1    | ---  | K.KLVFPATELHER.L               |
| 1528.7235                                                                                                                                                                                                                                                                                                                                                                                                                                                                                                                                                                                     | 1527.7162 | 1527.7868 | -46.17 | 259   | 271 | 0    | ---  | K.LNHQLEGLAFQMK.K              |
| 1664.7775                                                                                                                                                                                                                                                                                                                                                                                                                                                                                                                                                                                     | 1663.7702 | 1663.8417 | -42.96 | 77    | 90  | 0    | ---  | K.SELTQQLNTLFPQDK.L            |
| 1839.8657                                                                                                                                                                                                                                                                                                                                                                                                                                                                                                                                                                                     | 1838.8584 | 1838.9414 | -45.13 | 354   | 370 | 0    | ---  | K.LGPLAGDVEDHLSFLEK.D          |
| 2700.2822                                                                                                                                                                                                                                                                                                                                                                                                                                                                                                                                                                                     | 2699.2749 | 2699.3514 | -28.34 | 195   | 218 | 0    | ---  | R.QNLDQLQASLAPYAEELQATVNQR.V   |
| 2700.2822                                                                                                                                                                                                                                                                                                                                                                                                                                                                                                                                                                                     | 2699.2750 | 2699.3514 | -28.33 | 195   | 218 | 0    | 36   | R.QNLDQLQASLAPYAEELQATVNQR.V   |
| <b>No match to:</b> 834.4748, 842.4698, 848.4878, 850.0129, 850.4987, 853.4788, 864.5128, 865.9851, 868.5118, 870.5065, 876.9959, 882.5245, 882.5245, 892.9658, 951.5779, 960.4399, 996.5483, 1017.6229, 1017.6229, 1019.6358, 1033.6520, 1045.5190, 1051.6609, 1069.4803, 1131.6592, 1151.6812, 1156.5675, 1165.6880, 1165.6880, 1179.5543, 1182.6278, 1182.6278, 1194.5756, 1269.6084, 1300.7948, 1334.8268, 1425.6982, 1448.8599, 1475.6879, 1617.9976, 1691.7629, 1695.6990, 1702.7892, 1732.0278, 1880.9835, 1901.1722, 1904.9435, 2015.2070, 2211.0264, 2283.1013, 2682.3079, 2683.2788 |           |           |        |       |     |      |      |                                |

4. [A0A3Q1MZJ9](#) Mass: 45782 Score: 282 Expect: 8.5e-024 Matches: 24

Apolipoprotein A-IV OS=Bos taurus OX=9913 GN=APOA4 PE=3 SV=1

| Observed  | Mr(expt)  | Mr(calc)  | ppm    | Start | End | Miss | Ions | Peptide                        |
|-----------|-----------|-----------|--------|-------|-----|------|------|--------------------------------|
| 862.4257  | 861.4184  | 861.4556  | -43.12 | 339   | 346 | 0    | ---  | K.SLAELSSR.L                   |
| 977.4595  | 976.4522  | 976.4978  | -46.64 | 207   | 214 | 0    | ---  | R.QLTPYAEER.M                  |
| 977.4595  | 976.4523  | 976.4978  | -46.61 | 207   | 214 | 0    | 15   | R.QLTPYAEER.M                  |
| 1047.4978 | 1046.4905 | 1046.5396 | -46.92 | 186   | 194 | 0    | ---  | R.LGPYAEELR.T                  |
| 1047.4978 | 1046.4905 | 1046.5396 | -46.92 | 186   | 194 | 0    | 20   | R.LGPYAEELR.T                  |
| 1133.5562 | 1132.5489 | 1132.5989 | -44.10 | 206   | 214 | 1    | ---  | R.RQLTPYAEER.M                 |
| 1149.5057 | 1148.4984 | 1148.5462 | -41.60 | 347   | 355 | 0    | ---  | R.LDQQVEDFR.R                  |
| 1149.5057 | 1148.4985 | 1148.5462 | -41.57 | 347   | 355 | 0    | 20   | R.LDQQVEDFR.R                  |
| 1174.5699 | 1173.5626 | 1173.6176 | -46.83 | 368   | 377 | 0    | ---  | K.AMVQQLDTLR.Q                 |
| 1174.5700 | 1173.5627 | 1173.6176 | -46.79 | 368   | 377 | 0    | 50   | K.AMVQQLDTLR.Q                 |
| 1190.5620 | 1189.5547 | 1189.6125 | -48.57 | 368   | 377 | 0    | ---  | K.AMVQQLDTLR.Q + Oxidation (M) |



|           |           |           |        |     |   |     |   |     |                              |
|-----------|-----------|-----------|--------|-----|---|-----|---|-----|------------------------------|
| 1212.5294 | 1211.5221 | 1211.5823 | -49.63 | 357 | - | 367 | 0 | --- | R.TVGPYGETFNK.A              |
| 1277.6251 | 1276.6178 | 1276.6663 | -37.98 | 252 | - | 262 | 0 | --- | R.LTPYADQLQTK.I              |
| 1287.6068 | 1286.5995 | 1286.6579 | -45.36 | 195 | - | 205 | 0 | --- | R.TQVDTQAQQLR.R              |
| 1287.6068 | 1286.5995 | 1286.6579 | -45.35 | 195 | - | 205 | 0 | 14  | R.TQVDTQAQQLR.R              |
| 1305.5947 | 1304.5874 | 1304.6473 | -45.90 | 347 | - | 356 | 1 | --- | R.LDQQVEDFRR.T               |
| 1311.6462 | 1310.6389 | 1310.6983 | -45.28 | 131 | - | 141 | 0 | --- | K.LVPFATELHER.L              |
| 1311.6462 | 1310.6390 | 1310.6983 | -45.25 | 131 | - | 141 | 0 | 14  | K.LVPFATELHER.L              |
| 1439.7417 | 1438.7344 | 1438.7932 | -40.87 | 130 | - | 141 | 1 | --- | K.KLVFPATELHER.L             |
| 1528.7235 | 1527.7162 | 1527.7868 | -46.17 | 285 | - | 297 | 0 | --- | K.LNHQLEGLAFQMK.K            |
| 1664.7775 | 1663.7702 | 1663.8417 | -42.96 | 103 | - | 116 | 0 | --- | K.SELTQQLNTLFQDK.L           |
| 1839.8657 | 1838.8584 | 1838.9414 | -45.13 | 380 | - | 396 | 0 | --- | K.LGPLAGDVEDHLSFLEK.D        |
| 2700.2822 | 2699.2749 | 2699.3514 | -28.34 | 221 | - | 244 | 0 | --- | R.QNLDQLQASLAPYAEELQATVNQR.V |
| 2700.2822 | 2699.2750 | 2699.3514 | -28.33 | 221 | - | 244 | 0 | 36  | R.QNLDQLQASLAPYAEELQATVNQR.V |

**No match to:** 834.4748, 842.4698, 848.4878, 850.0129, 850.4987, 853.4788, 864.5128, 865.9851, 868.5118, 870.5065, 876.9959, 882.5245, 882.5245, 892.9658, 951.5779, 960.4399, 996.5483, 1017.6229, 1017.6229, 1019.6358, 1033.6520, 1045.5190, 1051.6609, 1069.4803, 1131.6592, 1151.6812, 1156.5675, 1165.6880, 1165.6880, 1179.5543, 1182.6278, 1182.6278, 1194.5756, 1269.6084, 1300.7948, 1334.8268, 1425.6982, 1448.8599, 1475.6879, 1617.9976, 1691.7629, 1695.6990, 1702.7892, 1732.0278, 1880.9835, 1901.1722, 1904.9435, 2015.2070, 2211.0264, 2283.1013, 2682.3079, 2683.2788

5. [A0A4W2GRG6](#) Mass: 43654 Score: 281 Expect: 1.1e-023 Matches: 24

Apolipoprotein A4 OS=Bos indicus x Bos taurus OX=30522 GN=APOA4 PE=3 SV=1

| Observed  | Mr(expt)  | Mr(calc)  | ppm    | Start | End | Miss | Ions | Peptide |                                |
|-----------|-----------|-----------|--------|-------|-----|------|------|---------|--------------------------------|
| 862.4257  | 861.4184  | 861.4556  | -43.12 | 318   | -   | 325  | 0    | ---     | K.SLAELSSR.L                   |
| 977.4595  | 976.4522  | 976.4978  | -46.64 | 186   | -   | 193  | 0    | ---     | R.QLTPYAER.M                   |
| 977.4595  | 976.4523  | 976.4978  | -46.61 | 186   | -   | 193  | 0    | 15      | R.QLTPYAER.M                   |
| 1047.4978 | 1046.4905 | 1046.5396 | -46.92 | 165   | -   | 173  | 0    | ---     | R.LGPYAEELR.T                  |
| 1047.4978 | 1046.4905 | 1046.5396 | -46.92 | 165   | -   | 173  | 0    | 20      | R.LGPYAEELR.T                  |
| 1133.5562 | 1132.5489 | 1132.5989 | -44.10 | 185   | -   | 193  | 1    | ---     | R.RQLTPYAER.M                  |
| 1149.5057 | 1148.4984 | 1148.5462 | -41.60 | 326   | -   | 334  | 0    | ---     | R.LDQQVEDFR.R                  |
| 1149.5057 | 1148.4985 | 1148.5462 | -41.57 | 326   | -   | 334  | 0    | 20      | R.LDQQVEDFR.R                  |
| 1174.5699 | 1173.5626 | 1173.6176 | -46.83 | 347   | -   | 356  | 0    | ---     | K.AMVQQLDTRL.Q                 |
| 1174.5700 | 1173.5627 | 1173.6176 | -46.79 | 347   | -   | 356  | 0    | 50      | K.AMVQQLDTRL.Q                 |
| 1190.5620 | 1189.5547 | 1189.6125 | -48.57 | 347   | -   | 356  | 0    | ---     | K.AMVQQLDTRL.Q + Oxidation (M) |
| 1212.5294 | 1211.5221 | 1211.5823 | -49.63 | 336   | -   | 346  | 0    | ---     | R.TVGPYGETFNK.A                |
| 1277.6251 | 1276.6178 | 1276.6663 | -37.98 | 231   | -   | 241  | 0    | ---     | R.LTPYADQLQTK.I                |
| 1287.6068 | 1286.5995 | 1286.6579 | -45.36 | 174   | -   | 184  | 0    | ---     | R.TQVDTQAQQLR.R                |
| 1287.6068 | 1286.5995 | 1286.6579 | -45.35 | 174   | -   | 184  | 0    | 14      | R.TQVDTQAQQLR.R                |
| 1305.5947 | 1304.5874 | 1304.6473 | -45.90 | 326   | -   | 335  | 1    | ---     | R.LDQQVEDFRR.T                 |
| 1311.6462 | 1310.6389 | 1310.6983 | -45.28 | 110   | -   | 120  | 0    | ---     | K.LVPFATELHER.L                |
| 1311.6462 | 1310.6390 | 1310.6983 | -45.25 | 110   | -   | 120  | 0    | 14      | K.LVPFATELHER.L                |
| 1439.7417 | 1438.7344 | 1438.7932 | -40.87 | 109   | -   | 120  | 1    | ---     | K.KLVFPATELHER.L               |
| 1528.7235 | 1527.7162 | 1527.7868 | -46.17 | 264   | -   | 276  | 0    | ---     | K.LNHQLEGLAFQMK.K              |
| 1664.7775 | 1663.7702 | 1663.8417 | -42.96 | 82    | -   | 95   | 0    | ---     | K.SELTQQLNTLFQDK.L             |
| 1839.8657 | 1838.8584 | 1838.9414 | -45.13 | 359   | -   | 375  | 0    | ---     | K.LGPLAGDVEDHLSFLEK.D          |
| 2700.2822 | 2699.2749 | 2699.3514 | -28.34 | 200   | -   | 223  | 0    | ---     | R.QNLDQLQASLAPYAEELQATVNQR.V   |
| 2700.2822 | 2699.2750 | 2699.3514 | -28.33 | 200   | -   | 223  | 0    | 36      | R.QNLDQLQASLAPYAEELQATVNQR.V   |

**No match to:** 834.4748, 842.4698, 848.4878, 850.0129, 850.4987, 853.4788, 864.5128, 865.9851, 868.5118, 870.5065, 876.9959, 882.5245, 882.5245, 892.9658, 951.5779, 960.4399, 996.5483, 1017.6229, 1017.6229, 1019.6358, 1033.6520, 1045.5190, 1051.6609, 1069.4803, 1131.6592, 1151.6812, 1156.5675, 1165.6880, 1165.6880, 1179.5543, 1182.6278, 1182.6278, 1194.5756, 1269.6084, 1300.7948, 1334.8268, 1425.6982, 1448.8599, 1475.6879, 1617.9976, 1691.7629, 1695.6990, 1702.7892, 1732.0278, 1880.9835, 1901.1722, 1904.9435, 2015.2070, 2211.0264, 2283.1013, 2682.3079, 2683.2788

6. [A0A4W2GSL9](#) Mass: 46566 Score: 279 Expect: 1.7e-023 Matches: 24

Apolipoprotein A4 OS=Bos indicus x Bos taurus OX=30522 GN=APOA4 PE=3 SV=1

| Observed  | Mr(expt)  | Mr(calc)  | ppm    | Start | End | Miss | Ions | Peptide |                                |
|-----------|-----------|-----------|--------|-------|-----|------|------|---------|--------------------------------|
| 862.4257  | 861.4184  | 861.4556  | -43.12 | 318   | -   | 325  | 0    | ---     | K.SLAELSSR.L                   |
| 977.4595  | 976.4522  | 976.4978  | -46.64 | 186   | -   | 193  | 0    | ---     | R.QLTPYAER.M                   |
| 977.4595  | 976.4523  | 976.4978  | -46.61 | 186   | -   | 193  | 0    | 15      | R.QLTPYAER.M                   |
| 1047.4978 | 1046.4905 | 1046.5396 | -46.92 | 165   | -   | 173  | 0    | ---     | R.LGPYAEELR.T                  |
| 1047.4978 | 1046.4905 | 1046.5396 | -46.92 | 165   | -   | 173  | 0    | 20      | R.LGPYAEELR.T                  |
| 1133.5562 | 1132.5489 | 1132.5989 | -44.10 | 185   | -   | 193  | 1    | ---     | R.RQLTPYAER.M                  |
| 1149.5057 | 1148.4984 | 1148.5462 | -41.60 | 326   | -   | 334  | 0    | ---     | R.LDQQVEDFR.R                  |
| 1149.5057 | 1148.4985 | 1148.5462 | -41.57 | 326   | -   | 334  | 0    | 20      | R.LDQQVEDFR.R                  |
| 1174.5699 | 1173.5626 | 1173.6176 | -46.83 | 347   | -   | 356  | 0    | ---     | K.AMVQQLDTRL.Q                 |
| 1174.5700 | 1173.5627 | 1173.6176 | -46.79 | 347   | -   | 356  | 0    | 50      | K.AMVQQLDTRL.Q                 |
| 1190.5620 | 1189.5547 | 1189.6125 | -48.57 | 347   | -   | 356  | 0    | ---     | K.AMVQQLDTRL.Q + Oxidation (M) |
| 1212.5294 | 1211.5221 | 1211.5823 | -49.63 | 336   | -   | 346  | 0    | ---     | R.TVGPYGETFNK.A                |
| 1277.6251 | 1276.6178 | 1276.6663 | -37.98 | 231   | -   | 241  | 0    | ---     | R.LTPYADQLQTK.I                |
| 1287.6068 | 1286.5995 | 1286.6579 | -45.36 | 174   | -   | 184  | 0    | ---     | R.TQVDTQAQQLR.R                |
| 1287.6068 | 1286.5995 | 1286.6579 | -45.35 | 174   | -   | 184  | 0    | 14      | R.TQVDTQAQQLR.R                |
| 1305.5947 | 1304.5874 | 1304.6473 | -45.90 | 326   | -   | 335  | 1    | ---     | R.LDQQVEDFRR.T                 |
| 1311.6462 | 1310.6389 | 1310.6983 | -45.28 | 110   | -   | 120  | 0    | ---     | K.LVPFATELHER.L                |
| 1311.6462 | 1310.6390 | 1310.6983 | -45.25 | 110   | -   | 120  | 0    | 14      | K.LVPFATELHER.L                |
| 1439.7417 | 1438.7344 | 1438.7932 | -40.87 | 109   | -   | 120  | 1    | ---     | K.KLVFPATELHER.L               |
| 1528.7235 | 1527.7162 | 1527.7868 | -46.17 | 264   | -   | 276  | 0    | ---     | K.LNHQLEGLAFQMK.K              |
| 1664.7775 | 1663.7702 | 1663.8417 | -42.96 | 82    | -   | 95   | 0    | ---     | K.SELTQQLNTLFQDK.L             |
| 1839.8657 | 1838.8584 | 1838.9414 | -45.13 | 359   | -   | 375  | 0    | ---     | K.LGPLAGDVEDHLSFLEK.D          |
| 2700.2822 | 2699.2749 | 2699.3514 | -28.34 | 200   | -   | 223  | 0    | ---     | R.QNLDQLQASLAPYAEELQATVNQR.V   |
| 2700.2822 | 2699.2750 | 2699.3514 | -28.33 | 200   | -   | 223  | 0    | 36      | R.QNLDQLQASLAPYAEELQATVNQR.V   |

**No match to:** 834.4748, 842.4698, 848.4878, 850.0129, 850.4987, 853.4788, 864.5128, 865.9851, 868.5118, 870.5065, 876.9959, 882.5245, 882.5245, 892.9658, 951.5779, 960.4399, 996.5483, 1017.6229, 1017.6229, 1019.6358, 1033.6520, 1045.5190, 1051.6609, 1069.4803, 1131.6592, 1151.6812, 1156.5675, 1165.6880, 1165.6880, 1179.5543, 1182.6278, 1182.6278, 1194.5756, 1269.6084, 1300.7948, 1334.8268, 1425.6982, 1448.8599, 1475.6879, 1617.9976, 1691.7629, 1695.6990, 1702.7892, 1732.0278, 1880.9835, 1901.1722, 1904.9435, 2015.2070, 2211.0264, 2283.1013, 2682.3079, 2683.2788

7. [F1N3Q7](#) Mass: 52487 Score: 271 Expect: 1.1e-022 Matches: 24

Apolipoprotein A-IV OS=Bos taurus OX=9913 GN=APOA4 PE=3 SV=2

| Observed  | Mr(expt)  | Mr(calc)  | ppm    | Start | End | Miss | Ions | Peptide |               |
|-----------|-----------|-----------|--------|-------|-----|------|------|---------|---------------|
| 862.4257  | 861.4184  | 861.4556  | -43.12 | 373   | -   | 380  | 0    | ---     | K.SLAELSSR.L  |
| 977.4595  | 976.4522  | 976.4978  | -46.64 | 241   | -   | 248  | 0    | ---     | R.QLTPYAER.M  |
| 977.4595  | 976.4523  | 976.4978  | -46.61 | 241   | -   | 248  | 0    | 15      | R.QLTPYAER.M  |
| 1047.4978 | 1046.4905 | 1046.5396 | -46.92 | 220   | -   | 228  | 0    | ---     | R.LGPYAEELR.T |
| 1047.4978 | 1046.4905 | 1046.5396 | -46.92 | 220   | -   | 228  | 0    | 20      | R.LGPYAEELR.T |
| 1133.5562 | 1132.5489 | 1132.5989 | -44.10 | 240   | -   | 248  | 1    | ---     | R.RQLTPYAER.M |

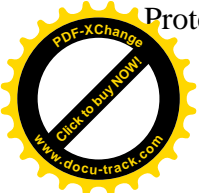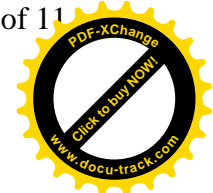

|           |           |           |        |     |   |     |   |     |                                 |
|-----------|-----------|-----------|--------|-----|---|-----|---|-----|---------------------------------|
| 1149.5057 | 1148.4984 | 1148.5462 | -41.60 | 381 | - | 389 | 0 | --- | R.LDQQVEDFR.R                   |
| 1149.5057 | 1148.4985 | 1148.5462 | -41.57 | 381 | - | 389 | 0 | 20  | R.LDQQVEDFR.R                   |
| 1174.5699 | 1173.5626 | 1173.6176 | -46.83 | 402 | - | 411 | 0 | --- | K.AMVQQLDTRLR.Q                 |
| 1174.5700 | 1173.5627 | 1173.6176 | -46.79 | 402 | - | 411 | 0 | 50  | K.AMVQQLDTRLR.Q                 |
| 1190.5620 | 1189.5547 | 1189.6125 | -48.57 | 402 | - | 411 | 0 | --- | K.AMVQQLDTRLR.Q + Oxidation (M) |
| 1212.5294 | 1211.5221 | 1211.5823 | -49.63 | 391 | - | 401 | 0 | --- | R.TVGPYGETFNK.A                 |
| 1277.6251 | 1276.6178 | 1276.6663 | -37.98 | 286 | - | 296 | 0 | --- | R.LTPYADQLQTK.I                 |
| 1287.6068 | 1286.5995 | 1286.6579 | -45.36 | 229 | - | 239 | 0 | --- | R.TQVDTQAQQLR.R                 |
| 1287.6068 | 1286.5995 | 1286.6579 | -45.35 | 229 | - | 239 | 0 | 14  | R.TQVDTQAQQLR.R                 |
| 1305.5947 | 1304.5874 | 1304.6473 | -45.90 | 381 | - | 390 | 1 | --- | R.LDQQVEDFRR.T                  |
| 1311.6462 | 1310.6389 | 1310.6983 | -45.28 | 165 | - | 175 | 0 | --- | K.LVPFATELHER.L                 |
| 1311.6462 | 1310.6390 | 1310.6983 | -45.25 | 165 | - | 175 | 0 | 14  | K.LVPFATELHER.L                 |
| 1439.7417 | 1438.7344 | 1438.7932 | -40.87 | 164 | - | 175 | 1 | --- | K.KLVPFATELHER.L                |
| 1528.7235 | 1527.7162 | 1527.7868 | -46.17 | 319 | - | 331 | 0 | --- | K.LNHQLEGLAFQMK.K               |
| 1664.7775 | 1663.7702 | 1663.8417 | -42.96 | 137 | - | 150 | 0 | --- | K.SELTQQLNTLTFQDK.L             |
| 1839.8657 | 1838.8584 | 1838.9414 | -45.13 | 414 | - | 430 | 0 | --- | K.LGPLAGDVEDHLSFLEK.D           |
| 2700.2822 | 2699.2749 | 2699.3514 | -28.34 | 255 | - | 278 | 0 | --- | R.QNLDDLQASLAPYAEELQATVNQR.V    |
| 2700.2822 | 2699.2750 | 2699.3514 | -28.33 | 255 | - | 278 | 0 | 36  | R.QNLDDLQASLAPYAEELQATVNQR.V    |

**No match to:** 834.4748, 842.4698, 848.4878, 850.0129, 850.4987, 853.4788, 864.5128, 865.9851, 868.5118, 870.5065, 876.9959, 882.5245, 882.5245, 892.9658, 951.5779, 960.4399, 996.5483, 1017.6229, 1017.6229, 1019.6358, 1033.6520, 1045.5190, 1051.6609, 1069.4803, 1131.6592, 1151.6812, 1156.5675, 1165.6880, 1165.6880, 1179.5543, 1182.6278, 1182.6278, 1182.6278, 1194.5756, 1269.6084, 1300.7948, 1334.8268, 1425.6982, 1448.8599, 1475.6879, 1617.9976, 1691.7629, 1695.6990, 1702.7892, 1732.0278, 1880.9835, 1901.1722, 1904.9435, 2015.2070, 2211.0264, 2283.1013, 2682.3079, 2683.2788

8. [Q32PJ2](#) Mass: 42991 Score: 248 Expect: 2.1e-020 Matches: 21

Apolipoprotein A-IV OS=Bos taurus OX=9913 GN=APOA4 PE=2 SV=1

| Observed  | Mr(expt)  | Mr(calc)  | ppm    | Start | End | Miss | Ions | Peptide |                                 |
|-----------|-----------|-----------|--------|-------|-----|------|------|---------|---------------------------------|
| 862.4257  | 861.4184  | 861.4556  | -43.12 | 288   | -   | 295  | 0    | ---     | K.SLAELSSR.L                    |
| 1047.4978 | 1046.4905 | 1046.5396 | -46.92 | 135   | -   | 143  | 0    | ---     | R.LGPIYAEELR.T                  |
| 1047.4978 | 1046.4905 | 1046.5396 | -46.92 | 135   | -   | 143  | 0    | 20      | R.LGPIYAEELR.T                  |
| 1149.5057 | 1148.4984 | 1148.5462 | -41.60 | 296   | -   | 304  | 0    | ---     | R.LDQQVEDFR.R                   |
| 1149.5057 | 1148.4985 | 1148.5462 | -41.57 | 296   | -   | 304  | 0    | 20      | R.LDQQVEDFR.R                   |
| 1174.5699 | 1173.5626 | 1173.6176 | -46.83 | 317   | -   | 326  | 0    | ---     | K.AMVQQLDTRLR.Q                 |
| 1174.5700 | 1173.5627 | 1173.6176 | -46.79 | 317   | -   | 326  | 0    | 50      | K.AMVQQLDTRLR.Q                 |
| 1190.5620 | 1189.5547 | 1189.6125 | -48.57 | 317   | -   | 326  | 0    | ---     | K.AMVQQLDTRLR.Q + Oxidation (M) |
| 1212.5294 | 1211.5221 | 1211.5823 | -49.63 | 306   | -   | 316  | 0    | ---     | R.TVGPYGETFNK.A                 |
| 1277.6251 | 1276.6178 | 1276.6663 | -37.98 | 201   | -   | 211  | 0    | ---     | R.LTPYADQLQTK.I                 |
| 1287.6068 | 1286.5995 | 1286.6579 | -45.36 | 144   | -   | 154  | 0    | ---     | R.TQVDTQAQQLR.R                 |
| 1287.6068 | 1286.5995 | 1286.6579 | -45.35 | 144   | -   | 154  | 0    | 14      | R.TQVDTQAQQLR.R                 |
| 1305.5947 | 1304.5874 | 1304.6473 | -45.90 | 296   | -   | 305  | 1    | ---     | R.LDQQVEDFRR.T                  |
| 1311.6462 | 1310.6389 | 1310.6983 | -45.28 | 80    | -   | 90   | 0    | ---     | K.LVPFATELHER.L                 |
| 1311.6462 | 1310.6390 | 1310.6983 | -45.25 | 80    | -   | 90   | 0    | 14      | K.LVPFATELHER.L                 |
| 1439.7417 | 1438.7344 | 1438.7932 | -40.87 | 79    | -   | 90   | 1    | ---     | K.KLVPFATELHER.L                |
| 1528.7235 | 1527.7162 | 1527.7868 | -46.17 | 234   | -   | 246  | 0    | ---     | K.LNHQLEGLAFQMK.K               |
| 1664.7775 | 1663.7702 | 1663.8417 | -42.96 | 52    | -   | 65   | 0    | ---     | K.SELTQQLNTLTFQDK.L             |
| 1839.8657 | 1838.8584 | 1838.9414 | -45.13 | 329   | -   | 345  | 0    | ---     | K.LGPLAGDVEDHLSFLEK.D           |
| 2700.2822 | 2699.2749 | 2699.3514 | -28.34 | 170   | -   | 193  | 0    | ---     | R.QNLDDLQASLAPYAEELQATVNQR.V    |
| 2700.2822 | 2699.2750 | 2699.3514 | -28.33 | 170   | -   | 193  | 0    | 36      | R.QNLDDLQASLAPYAEELQATVNQR.V    |

**No match to:** 834.4748, 842.4698, 848.4878, 850.0129, 850.4987, 853.4788, 864.5128, 865.9851, 868.5118, 870.5065, 876.9959, 882.5245, 882.5245, 892.9658, 951.5779, 960.4399, 977.4595, 977.4595, 996.5483, 1017.6229, 1017.6229, 1019.6358, 1033.6520, 1045.5190, 1051.6609, 1069.4803, 1131.6592, 1133.5562, 1151.6812, 1156.5675, 1165.6880, 1165.6880, 1179.5543, 1182.6278, 1182.6278, 1194.5756, 1269.6084, 1300.7948, 1334.8268, 1425.6982, 1448.8599, 1475.6879, 1617.9976, 1691.7629, 1695.6990, 1702.7892, 1732.0278, 1880.9835, 1901.1722, 1904.9435, 2015.2070, 2211.0264, 2283.1013, 2682.3079, 2683.2788

9. [F1N6W4](#) Mass: 145999 Score: 48 Expect: 2 Matches: 12

DENN domain containing 5A OS=Bos taurus OX=9913 GN=DENN5A PE=4 SV=3

| Observed  | Mr(expt)  | Mr(calc)  | ppm    | Start | End | Miss | Ions | Peptide |                    |
|-----------|-----------|-----------|--------|-------|-----|------|------|---------|--------------------|
| 842.4698  | 841.4625  | 841.4195  | 51.2   | 670   | -   | 676  | 0    | ---     | R.NAPAQWR.R        |
| 848.4878  | 847.4805  | 847.4287  | 61.2   | 419   | -   | 426  | 0    | ---     | R.ASELVSDK.R       |
| 1051.6609 | 1050.6536 | 1050.5822 | 68.0   | 849   | -   | 857  | 0    | ---     | R.HIQNIGIEIK.T     |
| 1131.6592 | 1130.6519 | 1130.5866 | 57.8   | 704   | -   | 713  | 1    | ---     | R.NMGSTIRQPK.L     |
| 1174.5699 | 1173.5626 | 1173.5123 | 42.9   | 2     | -   | 17   | 0    | ---     | M.SGGGGGGGGGSAPS.R |
| 1174.5700 | 1173.5627 | 1173.5123 | 42.9   | 2     | -   | 17   | 0    | 8       | M.SGGGGGGGGGSAPS.R |
| 1182.6278 | 1181.6205 | 1181.7244 | -87.92 | 592   | -   | 601  | 1    | ---     | R.LLNVRTPTLR.T     |
| 1182.6278 | 1181.6205 | 1181.7244 | -87.92 | 592   | -   | 601  | 1    | 24      | R.LLNVRTPTLR.T     |
| 1194.5756 | 1193.5683 | 1193.6049 | -30.66 | 1197  | -   | 1206 | 0    | ---     | K.FQMLVCLGAR.D     |
| 1305.5947 | 1304.5874 | 1304.5528 | 26.5   | 1     | -   | 17   | 0    | ---     | -MSGGGGGGGGSAPS.R  |
| 1311.6462 | 1310.6389 | 1310.7194 | -61.39 | 882   | -   | 892  | 1    | ---     | K.QLLSDHELTKK.L    |
| 1311.6462 | 1310.6390 | 1310.7194 | -61.36 | 882   | -   | 892  | 1    | ---     | K.QLLSDHELTKK.L    |

**No match to:** 834.4748, 850.0129, 850.4987, 853.4788, 862.4257, 864.5128, 865.9851, 868.5118, 870.5065, 876.9959, 882.5245, 882.5245, 892.9658, 951.5779, 960.4399, 977.4595, 977.4595, 996.5483, 1017.6229, 1017.6229, 1019.6358, 1033.6520, 1045.5190, 1047.4978, 1047.4978, 1069.4803, 1133.5562, 1149.5057, 1149.5057, 1151.6812, 1156.5675, 1165.6880, 1165.6880, 1179.5543, 1190.5620, 1212.5294, 1269.6084, 1277.6251, 1287.6068, 1287.6068, 1300.7948, 1334.8268, 1425.6982, 1439.7417, 1448.8599, 1475.6879, 1528.7235, 1617.9976, 1664.7775, 1691.7629, 1695.6990, 1702.7892, 1732.0278, 1839.8657, 1880.9835, 1901.1722, 1904.9435, 2015.2070, 2211.0264, 2283.1013, 2682.3079, 2683.2788, 2700.2822, 2700.2822

10. [A0A3Q1MUN3](#) Mass: 148571 Score: 48 Expect: 2.2 Matches: 12

DENN domain containing 5A OS=Bos taurus OX=9913 GN=DENN5A PE=4 SV=1

| Observed  | Mr(expt)  | Mr(calc)  | ppm    | Start | End | Miss | Ions | Peptide |                    |
|-----------|-----------|-----------|--------|-------|-----|------|------|---------|--------------------|
| 842.4698  | 841.4625  | 841.4195  | 51.2   | 694   | -   | 700  | 0    | ---     | R.NAPAQWR.R        |
| 848.4878  | 847.4805  | 847.4287  | 61.2   | 443   | -   | 450  | 0    | ---     | R.ASELVSDK.R       |
| 1051.6609 | 1050.6536 | 1050.5822 | 68.0   | 873   | -   | 881  | 0    | ---     | R.HIQNIGIEIK.T     |
| 1131.6592 | 1130.6519 | 1130.5866 | 57.8   | 728   | -   | 737  | 1    | ---     | R.NMGSTIRQPK.L     |
| 1174.5699 | 1173.5626 | 1173.5123 | 42.9   | 2     | -   | 17   | 0    | ---     | M.SGGGGGGGGGSAPS.R |
| 1174.5700 | 1173.5627 | 1173.5123 | 42.9   | 2     | -   | 17   | 0    | 8       | M.SGGGGGGGGGSAPS.R |
| 1182.6278 | 1181.6205 | 1181.7244 | -87.92 | 616   | -   | 625  | 1    | ---     | R.LLNVRTPTLR.T     |
| 1182.6278 | 1181.6205 | 1181.7244 | -87.92 | 616   | -   | 625  | 1    | 24      | R.LLNVRTPTLR.T     |
| 1194.5756 | 1193.5683 | 1193.6049 | -30.66 | 1221  | -   | 1230 | 0    | ---     | K.FQMLVCLGAR.D     |
| 1305.5947 | 1304.5874 | 1304.5528 | 26.5   | 1     | -   | 17   | 0    | ---     | -MSGGGGGGGGSAPS.R  |
| 1311.6462 | 1310.6389 | 1310.7194 | -61.39 | 906   | -   | 916  | 1    | ---     | K.QLLSDHELTKK.L    |
| 1311.6462 | 1310.6390 | 1310.7194 | -61.36 | 906   | -   | 916  | 1    | ---     | K.QLLSDHELTKK.L    |

**No match to:** 834.4748, 850.0129, 850.4987, 853.4788, 862.4257, 864.5128, 865.9851, 868.5118, 870.5065, 876.9959, 882.5245, 882.5245, 892.9658, 951.5779, 960.4399, 977.4595, 977.4595, 996.5483, 1017.6229, 1017.6229, 1019.6358, 1033.6520, 1045.5190, 1047.4978, 1047.4978, 1069.4803, 1133.5562, 1149.5057, 1149.5057, 1151.6812, 1156.5675, 1165.6880, 1165.6880, 1179.5543,

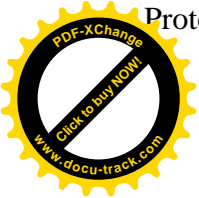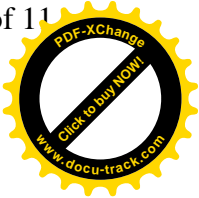

1190.5620, 1212.5294, 1269.6084, 1277.6251, 1287.6068, 1287.6068, 1300.7948, 1334.8268, 1425.6982, 1439.7417, 1448.8599, 1475.6879, 1528.7235, 1617.9976, 1664.7775, 1691.7629, 1695.6990, 1702.7892, 1732.0278, 1839.8657, 1880.9835, 1901.1722, 1904.9435, 2015.2070, 2211.0264, 2283.1013, 2682.3079, 2683.2788, 2700.2822, 2700.2822

11. [A0A4W2DBN8](#) Mass: 47465 Score: 46 Expect: 3.2 Matches: 14

Reverse transcriptase domain-containing protein OS=Bos indicus x Bos taurus OX=30522 PE=4 SV=1

| Observed  | Mr(expt)  | Mr(calc)  | ppm    | Start | End | Miss | Ions | Peptide                                     |
|-----------|-----------|-----------|--------|-------|-----|------|------|---------------------------------------------|
| 834.4748  | 833.4675  | 833.5044  | -44.29 | 305   | 311 | 1    | ---  | K.SLLMKVK.E + Oxidation (M)                 |
| 848.4878  | 847.4805  | 847.4287  | 61.2   | 310   | 316 | 1    | ---  | K.VKEESEK.V                                 |
| 882.5245  | 881.5172  | 881.4607  | 64.2   | 387   | 393 | 1    | ---  | K.SRDITYK.G                                 |
| 882.5245  | 881.5173  | 881.4607  | 64.2   | 387   | 393 | 1    | ---  | K.SRDITYK.G                                 |
| 1131.6592 | 1130.6519 | 1130.5720 | 70.7   | 148   | 157 | 0    | ---  | R.ELPDVQAGFR.K                              |
| 1133.5562 | 1132.5489 | 1132.6162 | -59.38 | 377   | 386 | 0    | ---  | K.VMTNLSILK.S                               |
| 1149.5057 | 1148.4984 | 1148.6111 | -98.10 | 377   | 386 | 0    | ---  | K.VMTNLSILK.S + Oxidation (M)               |
| 1149.5057 | 1148.4985 | 1148.6111 | -98.06 | 377   | 386 | 0    | ---  | K.VMTNLSILK.S + Oxidation (M)               |
| 1269.6084 | 1268.6011 | 1268.7101 | -85.93 | 279   | 288 | 1    | ---  | K.IAWRNINLNR.Y                              |
| 1277.6251 | 1276.6178 | 1276.7061 | -69.11 | 376   | 386 | 1    | ---  | R.KVMTNLSILK.S + Oxidation (M)              |
| 1287.6068 | 1286.5995 | 1286.6731 | -57.20 | 147   | 157 | 1    | ---  | K.RELPDVQAGFR.K                             |
| 1287.6068 | 1286.5995 | 1286.6731 | -57.20 | 147   | 157 | 1    | ---  | K.RELPDVQAGFR.K                             |
| 1702.7892 | 1701.7819 | 1701.7570 | 14.7   | 394   | 409 | 1    | ---  | K.GPSSQGYGFSSGRVWM.-                        |
| 2683.2788 | 2682.2715 | 2682.2644 | 2.65   | 245   | 266 | 0    | ---  | K.GVCSQGYILSPCLFNLYAEYIMR.N + Oxidation (M) |

No match to: 842.4698, 850.0129, 850.4987, 853.4788, 862.4257, 864.5128, 865.9851, 868.5118, 870.5065, 876.9959, 892.9658, 951.5779, 960.4399, 977.4595, 977.4595, 996.5483, 1017.6229, 1017.6229, 1019.6358, 1033.6520, 1045.5190, 1047.4978, 1047.4978, 1051.6609, 1069.4803, 1151.6812, 1156.5675, 1165.6880, 1165.6880, 1174.5699, 1174.5700, 1179.5543, 1182.6278, 1182.6278, 1190.5620, 1194.5756, 1212.5294, 1300.7948, 1305.5947, 1311.6462, 1311.6462, 1334.8268, 1425.6982, 1439.7417, 1448.8599, 1475.6879, 1528.7235, 1617.9976, 1664.7775, 1691.7629, 1695.6990, 1732.0278, 1839.8657, 1880.9835, 1901.1722, 1904.9435, 2015.2070, 2211.0264, 2283.1013, 2682.3079, 2700.2822, 2700.2822

12. [A0A4W2FJP8](#) Mass: 473166 Score: 45 Expect: 4.1 Matches: 30

Dynein axonemal heavy chain 6 OS=Bos indicus x Bos taurus OX=30522 GN=DNAH6 PE=4 SV=1

| Observed  | Mr(expt)  | Mr(calc)  | ppm    | Start | End  | Miss | Ions | Peptide                                 |
|-----------|-----------|-----------|--------|-------|------|------|------|-----------------------------------------|
| 834.4748  | 833.4675  | 833.4647  | 3.40   | 1784  | 1790 | 0    | ---  | K.TYVLNPK.S                             |
| 848.4878  | 847.4805  | 847.4334  | 55.6   | 2431  | 2436 | 1    | ---  | R.MIRQER.G + Oxidation (M)              |
| 864.5128  | 863.5055  | 863.4753  | 35.0   | 925   | 931  | 0    | ---  | K.FVTQLEK.G                             |
| 868.5118  | 867.5045  | 867.4464  | 67.1   | 649   | 654  | 1    | ---  | K.YHRQHK.D                              |
| 960.4399  | 959.4326  | 959.4672  | -36.05 | 2545  | 2553 | 0    | ---  | K.EVGISEGNNR.D                          |
| 977.4595  | 976.4522  | 976.5012  | -50.11 | 1810  | 1818 | 0    | ---  | K.DGLMALSVR.A + Oxidation (M)           |
| 977.4595  | 976.4523  | 976.5012  | -50.08 | 1810  | 1818 | 0    | ---  | K.DGLMALSVR.A + Oxidation (M)           |
| 1045.5190 | 1044.5117 | 1044.5451 | -31.97 | 3977  | 3986 | 0    | ---  | R.DQATVIEAAK.T                          |
| 1131.6592 | 1130.6519 | 1130.5608 | 80.6   | 232   | 240  | 1    | ---  | K.NDYTTISKK.A                           |
| 1149.5057 | 1148.4984 | 1148.4855 | 11.2   | 2320  | 2327 | 0    | ---  | R.LFCHECQR.V                            |
| 1149.5057 | 1148.4985 | 1148.4855 | 11.3   | 2320  | 2327 | 0    | ---  | R.LFCHECQR.V                            |
| 1156.5675 | 1155.5602 | 1155.5746 | -12.48 | 1551  | 1559 | 1    | ---  | R.FMFEGREIK.L                           |
| 1182.6278 | 1181.6205 | 1181.5750 | 38.5   | 1280  | 1289 | 0    | ---  | K.VEEAMFTSLR.R                          |
| 1182.6278 | 1181.6205 | 1181.5750 | 38.5   | 1280  | 1289 | 0    | 5    | K.VEEAMFTSLR.R                          |
| 1287.6068 | 1286.5995 | 1286.7207 | -94.20 | 1205  | 1215 | 1    | ---  | R.NPQAVQPHLRK.C                         |
| 1287.6068 | 1286.5995 | 1286.7207 | -94.19 | 1205  | 1215 | 1    | ---  | R.NPQAVQPHLRK.C                         |
| 1425.6982 | 1424.6909 | 1424.7088 | -12.57 | 3334  | 3344 | 0    | ---  | R.LTEAEWNFFLR.G                         |
| 1439.7417 | 1438.7344 | 1438.6472 | 60.6   | 1889  | 1900 | 0    | ---  | R.CGMVFVDPEELK.W + Oxidation (M)        |
| 1448.8599 | 1447.8526 | 1447.9238 | -49.18 | 1355  | 1368 | 1    | ---  | R.LNALAAIVRGILPK.L                      |
| 1475.6879 | 1474.6806 | 1474.7701 | -60.67 | 2856  | 2869 | 0    | ---  | R.AAQALDITMATLK.E                       |
| 1528.7235 | 1527.7162 | 1527.8046 | -57.81 | 1030  | 1042 | 1    | ---  | K.TTEFVVLPHRDSK.D                       |
| 1617.9976 | 1616.9903 | 1616.8596 | 80.9   | 1119  | 1132 | 1    | ---  | R.QLPAEAKMFLQVSK.S                      |
| 1664.7775 | 1663.7702 | 1663.9185 | -89.12 | 3454  | 3468 | 0    | ---  | K.VVFALTDVFVNLGK.A                      |
| 1691.7629 | 1690.7556 | 1690.8414 | -50.71 | 907   | 921  | 0    | ---  | K.FDSLDPPELLNSQVSK.Y                    |
| 1880.9835 | 1879.9762 | 1879.9138 | 33.2   | 4092  | 4107 | 1    | ---  | K.DYWIAKGALLCQLNE.-                     |
| 1901.1722 | 1900.1649 | 1900.0319 | 70.0   | 2415  | 2430 | 1    | ---  | K.LVFFQDAIEHVSRIAR.M                    |
| 1904.9435 | 1903.9362 | 1903.9778 | -21.86 | 3818  | 3834 | 0    | ---  | R.VPEILETENASESLFVK.D                   |
| 2211.0264 | 2210.0191 | 2210.0677 | -22.00 | 1271  | 1289 | 1    | ---  | R.GNVEEWLKGVEEAMFTSLR.R + Oxidation (M) |
| 2682.3079 | 2681.3006 | 2681.3871 | -32.27 | 3145  | 3167 | 1    | ---  | K.SGLEDQLLSDVVRLEKPELEEQR.I             |
| 2683.2788 | 2682.2715 | 2682.3725 | -37.66 | 2999  | 3022 | 1    | ---  | R.QWNTDGLPRDLISTENGILVTQGR.R            |

No match to: 842.4698, 850.0129, 850.4987, 853.4788, 862.4257, 865.9851, 870.5065, 876.9959, 882.5245, 882.5245, 892.9658, 951.5779, 960.4399, 977.4595, 977.4595, 1017.6229, 1017.6229, 1019.6358, 1033.6520, 1047.4978, 1047.4978, 1051.6609, 1069.4803, 1133.5562, 1151.6812, 1165.6880, 1165.6880, 1174.5699, 1174.5700, 1179.5543, 1190.5620, 1194.5756, 1212.5294, 1269.6084, 1277.6251, 1300.7948, 1305.5947, 1311.6462, 1311.6462, 1334.8268, 1695.6990, 1702.7892, 1732.0278, 1839.8657, 2015.2070, 2283.1013, 2700.2822, 2700.2822

13. [A0A4W2HIT4](#) Mass: 478985 Score: 45 Expect: 4.3 Matches: 30

Dynein axonemal heavy chain 6 OS=Bos indicus x Bos taurus OX=30522 GN=DNAH6 PE=4 SV=1

| Observed  | Mr(expt)  | Mr(calc)  | ppm    | Start | End  | Miss | Ions | Peptide                          |
|-----------|-----------|-----------|--------|-------|------|------|------|----------------------------------|
| 834.4748  | 833.4675  | 833.4647  | 3.40   | 1784  | 1790 | 0    | ---  | K.TYVLNPK.S                      |
| 848.4878  | 847.4805  | 847.4334  | 55.6   | 2431  | 2436 | 1    | ---  | R.MIRQER.G + Oxidation (M)       |
| 864.5128  | 863.5055  | 863.4753  | 35.0   | 925   | 931  | 0    | ---  | K.FVTQLEK.G                      |
| 868.5118  | 867.5045  | 867.4464  | 67.1   | 649   | 654  | 1    | ---  | K.YHRQHK.D                       |
| 960.4399  | 959.4326  | 959.4672  | -36.05 | 2545  | 2553 | 0    | ---  | K.EVGISEGNNR.D                   |
| 977.4595  | 976.4522  | 976.5012  | -50.11 | 1810  | 1818 | 0    | ---  | K.DGLMALSVR.A + Oxidation (M)    |
| 977.4595  | 976.4523  | 976.5012  | -50.08 | 1810  | 1818 | 0    | ---  | K.DGLMALSVR.A + Oxidation (M)    |
| 1045.5190 | 1044.5117 | 1044.5451 | -31.97 | 4024  | 4033 | 0    | ---  | R.DQATVIEAAK.T                   |
| 1131.6592 | 1130.6519 | 1130.5608 | 80.6   | 232   | 240  | 1    | ---  | K.NDYTTISKK.A                    |
| 1149.5057 | 1148.4984 | 1148.4855 | 11.2   | 2320  | 2327 | 0    | ---  | R.LFCHECQR.V                     |
| 1149.5057 | 1148.4985 | 1148.4855 | 11.3   | 2320  | 2327 | 0    | ---  | R.LFCHECQR.V                     |
| 1156.5675 | 1155.5602 | 1155.5746 | -12.48 | 1551  | 1559 | 1    | ---  | R.FMFEGREIK.L                    |
| 1182.6278 | 1181.6205 | 1181.5750 | 38.5   | 1280  | 1289 | 0    | ---  | K.VEEAMFTSLR.R                   |
| 1182.6278 | 1181.6205 | 1181.5750 | 38.5   | 1280  | 1289 | 0    | 5    | K.VEEAMFTSLR.R                   |
| 1287.6068 | 1286.5995 | 1286.7207 | -94.20 | 1205  | 1215 | 1    | ---  | R.NPQAVQPHLRK.C                  |
| 1287.6068 | 1286.5995 | 1286.7207 | -94.19 | 1205  | 1215 | 1    | ---  | R.NPQAVQPHLRK.C                  |
| 1425.6982 | 1424.6909 | 1424.7088 | -12.57 | 3381  | 3391 | 0    | ---  | R.LTEAEWNFFLR.G                  |
| 1439.7417 | 1438.7344 | 1438.6472 | 60.6   | 1889  | 1900 | 0    | ---  | R.CGMVFVDPEELK.W + Oxidation (M) |
| 1448.8599 | 1447.8526 | 1447.9238 | -49.18 | 1355  | 1368 | 1    | ---  | R.LNALAAIVRGILPK.L               |
| 1475.6879 | 1474.6806 | 1474.7701 | -60.67 | 2903  | 2916 | 0    | ---  | R.AAQALDITMATLK.E                |
| 1528.7235 | 1527.7162 | 1527.8046 | -57.81 | 1030  | 1042 | 1    | ---  | K.TTEFVVLPHRDSK.D                |
| 1617.9976 | 1616.9903 | 1616.8596 | 80.9   | 1119  | 1132 | 1    | ---  | R.QLPAEAKMFLQVSK.S               |
| 1664.7775 | 1663.7702 | 1663.9185 | -89.12 | 3501  | 3515 | 0    | ---  | K.VVFALTDVFVNLGK.A               |
| 1691.7629 | 1690.7556 | 1690.8414 | -50.71 | 907   | 921  | 0    | ---  | K.FDSLDPPELLNSQVSK.Y             |



|                                                                                                                                                                                                                                                                                                                                                                                                                                                                                                                                                                                                                                                          |           |           |        |      |   |      |   |     |                                        |
|----------------------------------------------------------------------------------------------------------------------------------------------------------------------------------------------------------------------------------------------------------------------------------------------------------------------------------------------------------------------------------------------------------------------------------------------------------------------------------------------------------------------------------------------------------------------------------------------------------------------------------------------------------|-----------|-----------|--------|------|---|------|---|-----|----------------------------------------|
| 1880.9835                                                                                                                                                                                                                                                                                                                                                                                                                                                                                                                                                                                                                                                | 1879.9762 | 1879.9138 | 33.2   | 4139 | - | 4154 | 1 | --- | K.DYWIAKGSALLCQLNE.-                   |
| 1901.1722                                                                                                                                                                                                                                                                                                                                                                                                                                                                                                                                                                                                                                                | 1900.1649 | 1900.0319 | 70.0   | 2415 | - | 2430 | 1 | --- | K.LVFFQDAIEHVSRIAR.M                   |
| 1904.9435                                                                                                                                                                                                                                                                                                                                                                                                                                                                                                                                                                                                                                                | 1903.9362 | 1903.9778 | -21.86 | 3865 | - | 3881 | 0 | --- | R.VPEILETENASESLFVK.D                  |
| 2211.0264                                                                                                                                                                                                                                                                                                                                                                                                                                                                                                                                                                                                                                                | 2210.0191 | 2210.0677 | -22.00 | 1271 | - | 1289 | 1 | --- | R.GNVEEWLGKVEAMFTSLR.R + Oxidation (M) |
| 2682.3079                                                                                                                                                                                                                                                                                                                                                                                                                                                                                                                                                                                                                                                | 2681.3006 | 2681.3871 | -32.27 | 3192 | - | 3214 | 1 | --- | K.SGLEDQLLSDVVRLEKPELEEQR.I            |
| 2683.2788                                                                                                                                                                                                                                                                                                                                                                                                                                                                                                                                                                                                                                                | 2682.2715 | 2682.3725 | -37.66 | 3046 | - | 3069 | 1 | --- | R.QWNTDGLPRDLISTENGILVTQGR.R           |
| <b>No match to:</b> 842.4698, 850.0129, 850.4987, 853.4788, 862.4257, 865.9851, 870.5065, 876.9959, 882.5245, 882.5245, 892.9658, 951.5779, 996.5483, 1017.6229, 1017.6229, 1019.6358, 1033.6520, 1047.4978, 1047.4978, 1051.6609, 1069.4803, 1133.5562, 1151.6812, 1165.6880, 1165.6880, 1174.5699, 1174.5699, 1174.5700, 1179.5543, 1190.5620, 1194.5756, 1212.5294, 1269.6084, 1300.7948, 1305.5947, 1311.6462, 1300.7948, 1305.5947, 1311.6462, 1311.6462, 1334.8268, 1425.6982, 1439.7417, 1448.8599, 1475.6879, 1528.7235, 1617.9976, 1664.7775, 1691.7629, 1695.6990, 1702.7892, 1732.0278, 1839.8657, 2015.2070, 2283.1013, 2700.2822, 2700.2822 |           |           |        |      |   |      |   |     |                                        |

14. [A0A3Q1LWT9](#) Mass: 14058 Score: 44 Expect: 5.4 Matches: 7

| Uncharacterized protein OS=Bos taurus OX=9913 PE=4 SV=1                                                                                                                                                                                                                                                                                                                                                                                                                                                                                                                                                                                                                                                                                                                                  |           |           |        |       |     |      |      |         |                  |
|------------------------------------------------------------------------------------------------------------------------------------------------------------------------------------------------------------------------------------------------------------------------------------------------------------------------------------------------------------------------------------------------------------------------------------------------------------------------------------------------------------------------------------------------------------------------------------------------------------------------------------------------------------------------------------------------------------------------------------------------------------------------------------------|-----------|-----------|--------|-------|-----|------|------|---------|------------------|
| Observed                                                                                                                                                                                                                                                                                                                                                                                                                                                                                                                                                                                                                                                                                                                                                                                 | Mr(expt)  | Mr(calc)  | ppm    | Start | End | Miss | Ions | Peptide |                  |
| 862.4257                                                                                                                                                                                                                                                                                                                                                                                                                                                                                                                                                                                                                                                                                                                                                                                 | 861.4184  | 861.4416  | -26.96 | 96    | -   | 104  | 1    | ---     | R.GASASSRAR.V    |
| 977.4595                                                                                                                                                                                                                                                                                                                                                                                                                                                                                                                                                                                                                                                                                                                                                                                 | 976.4522  | 976.4839  | -32.39 | 94    | -   | 102  | 1    | ---     | R.WRGASASSR.A    |
| 977.4595                                                                                                                                                                                                                                                                                                                                                                                                                                                                                                                                                                                                                                                                                                                                                                                 | 976.4523  | 976.4839  | -32.36 | 94    | -   | 102  | 1    | 15      | R.WRGASASSR.A    |
| 1149.5057                                                                                                                                                                                                                                                                                                                                                                                                                                                                                                                                                                                                                                                                                                                                                                                | 1148.4984 | 1148.5682 | -60.73 | 30    | -   | 39   | 0    | ---     | R.LDTAQMAMIR.Y   |
| 1149.5057                                                                                                                                                                                                                                                                                                                                                                                                                                                                                                                                                                                                                                                                                                                                                                                | 1148.4985 | 1148.5682 | -60.69 | 30    | -   | 39   | 0    | 2       | R.LDTAQMAMIR.Y   |
| 1287.6068                                                                                                                                                                                                                                                                                                                                                                                                                                                                                                                                                                                                                                                                                                                                                                                | 1286.5995 | 1286.5739 | 20.0   | 18    | -   | 29   | 0    | ---     | R.SAVYSSSESTNR.L |
| 1287.6068                                                                                                                                                                                                                                                                                                                                                                                                                                                                                                                                                                                                                                                                                                                                                                                | 1286.5995 | 1286.5739 | 20.0   | 18    | -   | 29   | 0    | ---     | R.SAVYSSSESTNR.L |
| <b>No match to:</b> 834.4748, 842.4698, 848.4878, 850.0129, 850.4987, 853.4788, 864.5128, 865.9851, 868.5118, 870.5065, 876.9959, 882.5245, 882.5245, 892.9658, 951.5779, 960.4399, 996.5483, 1017.6229, 1017.6229, 1019.6358, 1033.6520, 1045.5190, 1047.4978, 1047.4978, 1051.6609, 1069.4803, 1131.6592, 1133.5562, 1151.6812, 1156.5675, 1165.6880, 1165.6880, 1174.5699, 1174.5700, 1179.5543, 1182.6278, 1182.6278, 1190.5620, 1194.5756, 1212.5294, 1269.6084, 1277.6251, 1300.7948, 1305.5947, 1311.6462, 1311.6462, 1334.8268, 1425.6982, 1439.7417, 1448.8599, 1475.6879, 1528.7235, 1617.9976, 1664.7775, 1691.7629, 1695.6990, 1702.7892, 1732.0278, 1839.8657, 1880.9835, 1901.1722, 1904.9435, 2015.2070, 2211.0264, 2283.1013, 2682.3079, 2683.2788, 2700.2822, 2700.2822 |           |           |        |       |     |      |      |         |                  |

15. [A0A4W2DIE4](#) Mass: 14058 Score: 44 Expect: 5.4 Matches: 7

| Uncharacterized protein OS=Bos indicus x Bos taurus OX=30522 PE=4 SV=1                                                                                                                                                                                                                                                                                                                                                                                                                                                                                                                                                                                                                                                                                                                   |           |           |        |       |     |      |      |         |                  |
|------------------------------------------------------------------------------------------------------------------------------------------------------------------------------------------------------------------------------------------------------------------------------------------------------------------------------------------------------------------------------------------------------------------------------------------------------------------------------------------------------------------------------------------------------------------------------------------------------------------------------------------------------------------------------------------------------------------------------------------------------------------------------------------|-----------|-----------|--------|-------|-----|------|------|---------|------------------|
| Observed                                                                                                                                                                                                                                                                                                                                                                                                                                                                                                                                                                                                                                                                                                                                                                                 | Mr(expt)  | Mr(calc)  | ppm    | Start | End | Miss | Ions | Peptide |                  |
| 862.4257                                                                                                                                                                                                                                                                                                                                                                                                                                                                                                                                                                                                                                                                                                                                                                                 | 861.4184  | 861.4416  | -26.96 | 96    | -   | 104  | 1    | ---     | R.GASASSRAR.V    |
| 977.4595                                                                                                                                                                                                                                                                                                                                                                                                                                                                                                                                                                                                                                                                                                                                                                                 | 976.4522  | 976.4839  | -32.39 | 94    | -   | 102  | 1    | ---     | R.WRGASASSR.A    |
| 977.4595                                                                                                                                                                                                                                                                                                                                                                                                                                                                                                                                                                                                                                                                                                                                                                                 | 976.4523  | 976.4839  | -32.36 | 94    | -   | 102  | 1    | 15      | R.WRGASASSR.A    |
| 1149.5057                                                                                                                                                                                                                                                                                                                                                                                                                                                                                                                                                                                                                                                                                                                                                                                | 1148.4984 | 1148.5682 | -60.73 | 30    | -   | 39   | 0    | ---     | R.LDTAQMAMIR.Y   |
| 1149.5057                                                                                                                                                                                                                                                                                                                                                                                                                                                                                                                                                                                                                                                                                                                                                                                | 1148.4985 | 1148.5682 | -60.69 | 30    | -   | 39   | 0    | 2       | R.LDTAQMAMIR.Y   |
| 1287.6068                                                                                                                                                                                                                                                                                                                                                                                                                                                                                                                                                                                                                                                                                                                                                                                | 1286.5995 | 1286.5739 | 20.0   | 18    | -   | 29   | 0    | ---     | R.SAVYSSSESTNR.L |
| 1287.6068                                                                                                                                                                                                                                                                                                                                                                                                                                                                                                                                                                                                                                                                                                                                                                                | 1286.5995 | 1286.5739 | 20.0   | 18    | -   | 29   | 0    | ---     | R.SAVYSSSESTNR.L |
| <b>No match to:</b> 834.4748, 842.4698, 848.4878, 850.0129, 850.4987, 853.4788, 864.5128, 865.9851, 868.5118, 870.5065, 876.9959, 882.5245, 882.5245, 892.9658, 951.5779, 960.4399, 996.5483, 1017.6229, 1017.6229, 1019.6358, 1033.6520, 1045.5190, 1047.4978, 1047.4978, 1051.6609, 1069.4803, 1131.6592, 1133.5562, 1151.6812, 1156.5675, 1165.6880, 1165.6880, 1174.5699, 1174.5700, 1179.5543, 1182.6278, 1182.6278, 1190.5620, 1194.5756, 1212.5294, 1269.6084, 1277.6251, 1300.7948, 1305.5947, 1311.6462, 1311.6462, 1334.8268, 1425.6982, 1439.7417, 1448.8599, 1475.6879, 1528.7235, 1617.9976, 1664.7775, 1691.7629, 1695.6990, 1702.7892, 1732.0278, 1839.8657, 1880.9835, 1901.1722, 1904.9435, 2015.2070, 2211.0264, 2283.1013, 2682.3079, 2683.2788, 2700.2822, 2700.2822 |           |           |        |       |     |      |      |         |                  |

16. [A0A4W2EFU9](#) Mass: 24150 Score: 44 Expect: 5.5 Matches: 9

| Hypoxanthine phosphoribosyltransferase OS=Bos indicus x Bos taurus OX=30522 PE=3 SV=1                                                                                                                                                                                                                                                                                                                                                                                                                                                                                                                                                                                                                                                                              |           |           |        |       |     |      |      |         |                                             |
|--------------------------------------------------------------------------------------------------------------------------------------------------------------------------------------------------------------------------------------------------------------------------------------------------------------------------------------------------------------------------------------------------------------------------------------------------------------------------------------------------------------------------------------------------------------------------------------------------------------------------------------------------------------------------------------------------------------------------------------------------------------------|-----------|-----------|--------|-------|-----|------|------|---------|---------------------------------------------|
| Observed                                                                                                                                                                                                                                                                                                                                                                                                                                                                                                                                                                                                                                                                                                                                                           | Mr(expt)  | Mr(calc)  | ppm    | Start | End | Miss | Ions | Peptide |                                             |
| 848.4878                                                                                                                                                                                                                                                                                                                                                                                                                                                                                                                                                                                                                                                                                                                                                           | 847.4805  | 847.4586  | 25.9   | 49    | -   | 55   | 1    | ---     | R.LARDVMK.E + Oxidation (M)                 |
| 882.5245                                                                                                                                                                                                                                                                                                                                                                                                                                                                                                                                                                                                                                                                                                                                                           | 881.5172  | 881.4395  | 88.1   | 74    | -   | 80   | 0    | ---     | K.FFADLNR.N                                 |
| 882.5245                                                                                                                                                                                                                                                                                                                                                                                                                                                                                                                                                                                                                                                                                                                                                           | 881.5173  | 881.4395  | 88.2   | 74    | -   | 80   | 0    | ---     | K.FFADLNR.N                                 |
| 1133.5562                                                                                                                                                                                                                                                                                                                                                                                                                                                                                                                                                                                                                                                                                                                                                          | 1132.5489 | 1132.6526 | -91.51 | 135   | -   | 144  | 0    | ---     | K.TMQTLLSLVK.K                              |
| 1194.5756                                                                                                                                                                                                                                                                                                                                                                                                                                                                                                                                                                                                                                                                                                                                                          | 1193.5683 | 1193.6115 | -36.13 | 85    | -   | 94   | 0    | ---     | K.SIPMTVDFIR.L + Oxidation (M)              |
| 1277.6251                                                                                                                                                                                                                                                                                                                                                                                                                                                                                                                                                                                                                                                                                                                                                          | 1276.6178 | 1276.7424 | -97.61 | 135   | -   | 145  | 1    | ---     | K.TMQTLLSLVKK.H + Oxidation (M)             |
| 1287.6068                                                                                                                                                                                                                                                                                                                                                                                                                                                                                                                                                                                                                                                                                                                                                          | 1286.5995 | 1286.6408 | -32.05 | 70    | -   | 80   | 1    | ---     | K.GGYKFFADLNR.N                             |
| 1287.6068                                                                                                                                                                                                                                                                                                                                                                                                                                                                                                                                                                                                                                                                                                                                                          | 1286.5995 | 1286.6408 | -32.04 | 70    | -   | 80   | 1    | ---     | K.GGYKFFADLNR.N                             |
| 2682.3079                                                                                                                                                                                                                                                                                                                                                                                                                                                                                                                                                                                                                                                                                                                                                          | 2681.3006 | 2681.1738 | 47.3   | 1     | -   | 24   | 0    | ---     | -.MAAHSFSVVNSNDEPGYDLDFCK.T + Oxidation (M) |
| <b>No match to:</b> 834.4748, 842.4698, 850.0129, 850.4987, 853.4788, 862.4257, 864.5128, 865.9851, 868.5118, 870.5065, 876.9959, 892.9658, 951.5779, 960.4399, 977.4595, 977.4595, 996.5483, 1017.6229, 1017.6229, 1019.6358, 1033.6520, 1045.5190, 1047.4978, 1047.4978, 1051.6609, 1069.4803, 1131.6592, 1149.5057, 1149.5057, 1151.6812, 1156.5675, 1165.6880, 1165.6880, 1174.5699, 1174.5700, 1179.5543, 1182.6278, 1182.6278, 1190.5620, 1212.5294, 1269.6084, 1300.7948, 1305.5947, 1311.6462, 1311.6462, 1334.8268, 1425.6982, 1439.7417, 1448.8599, 1475.6879, 1528.7235, 1617.9976, 1664.7775, 1691.7629, 1695.6990, 1702.7892, 1732.0278, 1839.8657, 1880.9835, 1901.1722, 1904.9435, 2015.2070, 2211.0264, 2283.1013, 2683.2788, 2700.2822, 2700.2822 |           |           |        |       |     |      |      |         |                                             |

17. [E1BA06](#) Mass: 24150 Score: 44 Expect: 5.5 Matches: 9

| Hypoxanthine phosphoribosyltransferase OS=Bos taurus OX=9913 PE=3 SV=2                                                                                                                                                                                                                                                                                                                                                                                                                                                                                                                                                                                                                                                                                             |           |           |        |       |     |      |      |         |                                             |
|--------------------------------------------------------------------------------------------------------------------------------------------------------------------------------------------------------------------------------------------------------------------------------------------------------------------------------------------------------------------------------------------------------------------------------------------------------------------------------------------------------------------------------------------------------------------------------------------------------------------------------------------------------------------------------------------------------------------------------------------------------------------|-----------|-----------|--------|-------|-----|------|------|---------|---------------------------------------------|
| Observed                                                                                                                                                                                                                                                                                                                                                                                                                                                                                                                                                                                                                                                                                                                                                           | Mr(expt)  | Mr(calc)  | ppm    | Start | End | Miss | Ions | Peptide |                                             |
| 848.4878                                                                                                                                                                                                                                                                                                                                                                                                                                                                                                                                                                                                                                                                                                                                                           | 847.4805  | 847.4586  | 25.9   | 49    | -   | 55   | 1    | ---     | R.LARDVMK.E + Oxidation (M)                 |
| 882.5245                                                                                                                                                                                                                                                                                                                                                                                                                                                                                                                                                                                                                                                                                                                                                           | 881.5172  | 881.4395  | 88.1   | 74    | -   | 80   | 0    | ---     | K.FFADLNR.N                                 |
| 882.5245                                                                                                                                                                                                                                                                                                                                                                                                                                                                                                                                                                                                                                                                                                                                                           | 881.5173  | 881.4395  | 88.2   | 74    | -   | 80   | 0    | ---     | K.FFADLNR.N                                 |
| 1133.5562                                                                                                                                                                                                                                                                                                                                                                                                                                                                                                                                                                                                                                                                                                                                                          | 1132.5489 | 1132.6526 | -91.51 | 135   | -   | 144  | 0    | ---     | K.TMQTLLSLVK.K                              |
| 1194.5756                                                                                                                                                                                                                                                                                                                                                                                                                                                                                                                                                                                                                                                                                                                                                          | 1193.5683 | 1193.6115 | -36.13 | 85    | -   | 94   | 0    | ---     | K.SIPMTVDFIR.L + Oxidation (M)              |
| 1277.6251                                                                                                                                                                                                                                                                                                                                                                                                                                                                                                                                                                                                                                                                                                                                                          | 1276.6178 | 1276.7424 | -97.61 | 135   | -   | 145  | 1    | ---     | K.TMQTLLSLVKK.H + Oxidation (M)             |
| 1287.6068                                                                                                                                                                                                                                                                                                                                                                                                                                                                                                                                                                                                                                                                                                                                                          | 1286.5995 | 1286.6408 | -32.05 | 70    | -   | 80   | 1    | ---     | K.GGYKFFADLNR.N                             |
| 1287.6068                                                                                                                                                                                                                                                                                                                                                                                                                                                                                                                                                                                                                                                                                                                                                          | 1286.5995 | 1286.6408 | -32.04 | 70    | -   | 80   | 1    | ---     | K.GGYKFFADLNR.N                             |
| 2682.3079                                                                                                                                                                                                                                                                                                                                                                                                                                                                                                                                                                                                                                                                                                                                                          | 2681.3006 | 2681.1738 | 47.3   | 1     | -   | 24   | 0    | ---     | -.MAAHSFSVVNSNDEPGYDLDFCK.T + Oxidation (M) |
| <b>No match to:</b> 834.4748, 842.4698, 850.0129, 850.4987, 853.4788, 862.4257, 864.5128, 865.9851, 868.5118, 870.5065, 876.9959, 892.9658, 951.5779, 960.4399, 977.4595, 977.4595, 996.5483, 1017.6229, 1017.6229, 1019.6358, 1033.6520, 1045.5190, 1047.4978, 1047.4978, 1051.6609, 1069.4803, 1131.6592, 1149.5057, 1149.5057, 1151.6812, 1156.5675, 1165.6880, 1165.6880, 1174.5699, 1174.5700, 1179.5543, 1182.6278, 1182.6278, 1190.5620, 1212.5294, 1269.6084, 1300.7948, 1305.5947, 1311.6462, 1311.6462, 1334.8268, 1425.6982, 1439.7417, 1448.8599, 1475.6879, 1528.7235, 1617.9976, 1664.7775, 1691.7629, 1695.6990, 1702.7892, 1732.0278, 1839.8657, 1880.9835, 1901.1722, 1904.9435, 2015.2070, 2211.0264, 2283.1013, 2683.2788, 2700.2822, 2700.2822 |           |           |        |       |     |      |      |         |                                             |

18. [A0A4W2HDP5](#) Mass: 60337 Score: 43 Expect: 6.6 Matches: 8

| Zinc finger protein 382 OS=Bos indicus x Bos taurus OX=30522 GN=ZNF382 PE=4 SV=1 |           |           |        |       |     |      |      |         |                                  |
|----------------------------------------------------------------------------------|-----------|-----------|--------|-------|-----|------|------|---------|----------------------------------|
| Observed                                                                         | Mr(expt)  | Mr(calc)  | ppm    | Start | End | Miss | Ions | Peptide |                                  |
| 1045.5190                                                                        | 1044.5117 | 1044.5352 | -22.49 | 262   | -   | 269  | 0    | ---     | K.SYLIEHQR.I                     |
| 1047.4978                                                                        | 1046.4905 | 1046.5331 | -40.71 | 234   | -   | 241  | 0    | ---     | K.SIFIMHQR.S + Oxidation (M)     |
| 1047.4978                                                                        | 1046.4905 | 1046.5331 | -40.71 | 234   | -   | 241  | 0    | ---     | K.SIFIMHQR.S + Oxidation (M)     |
| 1051.6609                                                                        | 1050.6536 | 1050.5934 | 57.3   | 150   | -   | 157  | 1    | ---     | K.QLIQHRK.V                      |
| 1151.6812                                                                        | 1150.6739 | 1150.5838 | 78.3   | 1     | -   | 9    | 1    | ---     | -.MTKPD MIRK.L + 2 Oxidation (M) |
| 1182.6278                                                                        | 1181.6205 | 1181.6880 | -57.13 | 78    | -   | 87   | 1    | ---     | K.NHIISKTTLR.E                   |
| 1182.6278                                                                        | 1181.6205 | 1181.6880 | -57.12 | 78    | -   | 87   | 1    | 24      | K.NHIISKTTLR.E                   |

1194.5756 1193.5683 1193.6193 -42.69 219 - 228 1 --- K.KPHSYSKYGK.F  
**No match to:** 834.4748, 842.4698, 848.4878, 850.0129, 850.4987, 853.4788, 862.4257, 864.5128, 865.9851, 868.5118, 870.5065, 876.9959, 882.5245, 882.5245, 892.9658, 951.5779, 960.4399, 977.4595, 977.4595, 996.5483, 1017.6229, 1017.6229, 1019.6358, 1033.6520, 1069.4803, 1131.6592, 1133.5562, 1149.5057, 1149.5057, 1156.5675, 1165.6880, 1165.6880, 1174.5699, 1174.5700, 1179.5543, 1190.5620, 1212.5294, 1269.6084, 1277.6251, 1287.6068, 1287.6068, 1300.7948, 1305.5947, 1311.6462, 1311.6462, 1334.8268, 1425.6982, 1439.7417, 1448.8599, 1475.6879, 1528.7235, 1617.9976, 1664.7775, 1691.7629, 1695.6990, 1702.7892, 1732.0278, 1839.8657, 1880.9835, 1901.1722, 1904.9435, 2015.2070, 2211.0264, 2283.1013, 2682.3079, 2683.2788, 2700.2822, 2700.2822

19. [AOA4W2FFL4](#) Mass: 343058 Score: 43 Expect: 6.9 Matches: 21

Kalirin RhoGEF kinase OS=Bos indicus x Bos taurus OX=30522 GN=KALRN PE=4 SV=1

| Observed                                                                                                                                                                                                                                                                                                                                                                                                                                                                                                                                                                                                                        | Mr(expt)  | Mr(calc)  | ppm    | Start | End | Miss | Ions  | Peptide                                   |
|---------------------------------------------------------------------------------------------------------------------------------------------------------------------------------------------------------------------------------------------------------------------------------------------------------------------------------------------------------------------------------------------------------------------------------------------------------------------------------------------------------------------------------------------------------------------------------------------------------------------------------|-----------|-----------|--------|-------|-----|------|-------|-------------------------------------------|
| 834.4748                                                                                                                                                                                                                                                                                                                                                                                                                                                                                                                                                                                                                        | 833.4675  | 833.3879  | 95.5   | 723   | -   | 730  | 0 --- | R.DSAVSNK.T                               |
| 848.4878                                                                                                                                                                                                                                                                                                                                                                                                                                                                                                                                                                                                                        | 847.4805  | 847.4440  | 43.1   | 1212  | -   | 1218 | 0 --- | K.WVTTVDK.H                               |
| 951.5779                                                                                                                                                                                                                                                                                                                                                                                                                                                                                                                                                                                                                        | 950.5706  | 950.5410  | 31.2   | 618   | -   | 625  | 1 --- | K.AARHLEVR.I                              |
| 996.5483                                                                                                                                                                                                                                                                                                                                                                                                                                                                                                                                                                                                                        | 995.5410  | 995.5036  | 37.6   | 138   | -   | 146  | 1 --- | K.QKTNFGSSK.F                             |
| 1017.6229                                                                                                                                                                                                                                                                                                                                                                                                                                                                                                                                                                                                                       | 1016.6156 | 1016.6019 | 13.5   | 765   | -   | 772  | 0 --- | K.LDIFLQLR.I                              |
| 1017.6229                                                                                                                                                                                                                                                                                                                                                                                                                                                                                                                                                                                                                       | 1016.6156 | 1016.6019 | 13.6   | 765   | -   | 772  | 0 --- | K.LDIFLQLR.I                              |
| 1033.6520                                                                                                                                                                                                                                                                                                                                                                                                                                                                                                                                                                                                                       | 1032.6447 | 1032.5465 | 95.2   | 1202  | -   | 1210 | 0 --- | K.GHIHATEIR.K                             |
| 1051.6609                                                                                                                                                                                                                                                                                                                                                                                                                                                                                                                                                                                                                       | 1050.6536 | 1050.5532 | 95.6   | 93    | -   | 101  | 0 --- | R.GPTVIIDMR.G                             |
| 1156.5675                                                                                                                                                                                                                                                                                                                                                                                                                                                                                                                                                                                                                       | 1155.5602 | 1155.6360 | -65.56 | 1574  | -   | 1582 | 1 --- | K.NIREVIQER.I                             |
| 1174.5699                                                                                                                                                                                                                                                                                                                                                                                                                                                                                                                                                                                                                       | 1173.5626 | 1173.5713 | -7.40  | 2400  | -   | 2408 | 1 --- | K.KSCSWHTLR.M                             |
| 1174.5700                                                                                                                                                                                                                                                                                                                                                                                                                                                                                                                                                                                                                       | 1173.5627 | 1173.5713 | -7.35  | 2400  | -   | 2408 | 1 16  | K.KSCSWHTLR.M                             |
| 1269.6084                                                                                                                                                                                                                                                                                                                                                                                                                                                                                                                                                                                                                       | 1268.6011 | 1268.6765 | -59.39 | 2279  | -   | 2290 | 0 --- | K.GSSYNPLPLK.I                            |
| 1448.8599                                                                                                                                                                                                                                                                                                                                                                                                                                                                                                                                                                                                                       | 1447.8526 | 1447.7493 | 71.3   | 411   | -   | 423  | 0 --- | R.STILAMSAVFHQK.A + Oxidation (M)         |
| 1664.7775                                                                                                                                                                                                                                                                                                                                                                                                                                                                                                                                                                                                                       | 1663.7702 | 1663.8682 | -58.88 | 2914  | -   | 2926 | 1 --- | R.DFINVILQEDFRR.R                         |
| 1702.7892                                                                                                                                                                                                                                                                                                                                                                                                                                                                                                                                                                                                                       | 1701.7819 | 1701.9274 | -85.49 | 2566  | -   | 2581 | 0 --- | K.VQGVPAAPNRPIAQER.S                      |
| 1839.8657                                                                                                                                                                                                                                                                                                                                                                                                                                                                                                                                                                                                                       | 1838.8584 | 1838.8291 | 15.9   | 1900  | -   | 1916 | 0 --- | K.DPTGCLNEGMPPTPPR.N                      |
| 1880.9835                                                                                                                                                                                                                                                                                                                                                                                                                                                                                                                                                                                                                       | 1879.9762 | 1879.8337 | 75.8   | 2291  | -   | 2308 | 0 --- | K.ISTNNGSPGFDYHQAGDK.F                    |
| 1904.9435                                                                                                                                                                                                                                                                                                                                                                                                                                                                                                                                                                                                                       | 1903.9362 | 1903.9879 | -27.15 | 2014  | -   | 2027 | 1 --- | R.KLHIYVWYQCNKPR.S                        |
| 2683.2788                                                                                                                                                                                                                                                                                                                                                                                                                                                                                                                                                                                                                       | 2682.2715 | 2682.2781 | -2.47  | 2177  | -   | 2198 | 1 --- | K.MNYLVLEENVNDNPKFALLNR.E + Oxidation (M) |
| 2700.2822                                                                                                                                                                                                                                                                                                                                                                                                                                                                                                                                                                                                                       | 2699.2749 | 2699.3303 | -20.52 | 1378  | -   | 1400 | 0 --- | K.NKPDSNQLILEHAGTFFDEIQQR.H               |
| 2700.2822                                                                                                                                                                                                                                                                                                                                                                                                                                                                                                                                                                                                                       | 2699.2750 | 2699.3303 | -20.51 | 1378  | -   | 1400 | 0 0   | K.NKPDSNQLILEHAGTFFDEIQQR.H               |
| <b>No match to:</b> 842.4698, 850.0129, 850.4987, 853.4788, 862.4257, 864.5128, 865.9851, 868.5118, 870.5065, 876.9959, 882.5245, 882.5245, 892.9658, 960.4399, 977.4595, 977.4595, 1019.6358, 1045.5190, 1047.4978, 1047.4978, 1069.4803, 1131.6592, 1133.5562, 1149.5057, 1149.5057, 1151.6812, 1165.6880, 1165.6880, 1179.5543, 1182.6278, 1182.6278, 1190.5620, 1194.5756, 1212.5294, 1277.6251, 1287.6068, 1287.6068, 1300.7948, 1305.5947, 1311.6462, 1311.6462, 1334.8268, 1425.6982, 1439.7417, 1475.6879, 1528.7235, 1617.9976, 1691.7629, 1695.6990, 1732.0278, 1901.1722, 2015.2070, 2211.0264, 2283.1013, 2682.3079 |           |           |        |       |     |      |       |                                           |

20. [AOA4W2EN51](#) Mass: 85445 Score: 43 Expect: 7.2 Matches: 8

Cyclin and CBS domain divalent metal cation transport mediator 4 OS=Bos indicus x Bos taurus OX=30522 GN=CNM4 PE=4 SV=1

| Observed                                                                                                                                                                                                                                                                                                                                                                                                                                                                                                                                                                                                                                                                                                                                                                   | Mr(expt)  | Mr(calc)  | ppm    | Start | End | Miss | Ions  | Peptide                              |
|----------------------------------------------------------------------------------------------------------------------------------------------------------------------------------------------------------------------------------------------------------------------------------------------------------------------------------------------------------------------------------------------------------------------------------------------------------------------------------------------------------------------------------------------------------------------------------------------------------------------------------------------------------------------------------------------------------------------------------------------------------------------------|-----------|-----------|--------|-------|-----|------|-------|--------------------------------------|
| 1047.4978                                                                                                                                                                                                                                                                                                                                                                                                                                                                                                                                                                                                                                                                                                                                                                  | 1046.4905 | 1046.5179 | -26.14 | 216   | -   | 224  | 0 --- | R.IVQNCGTQK.E                        |
| 1047.4978                                                                                                                                                                                                                                                                                                                                                                                                                                                                                                                                                                                                                                                                                                                                                                  | 1046.4905 | 1046.5179 | -26.14 | 216   | -   | 224  | 0 --- | R.IVQNCGTQK.E                        |
| 1174.5699                                                                                                                                                                                                                                                                                                                                                                                                                                                                                                                                                                                                                                                                                                                                                                  | 1173.5626 | 1173.5989 | -30.94 | 710   | -   | 721  | 0 --- | R.SLAAAEGADTLR.A                     |
| 1174.5700                                                                                                                                                                                                                                                                                                                                                                                                                                                                                                                                                                                                                                                                                                                                                                  | 1173.5627 | 1173.5989 | -30.90 | 710   | -   | 721  | 0 31  | R.SLAAAEGADTLR.A                     |
| 1287.6068                                                                                                                                                                                                                                                                                                                                                                                                                                                                                                                                                                                                                                                                                                                                                                  | 1286.5995 | 1286.6520 | -40.77 | 601   | -   | 610  | 0 --- | R.LASHHYLYQR.S                       |
| 1287.6068                                                                                                                                                                                                                                                                                                                                                                                                                                                                                                                                                                                                                                                                                                                                                                  | 1286.5995 | 1286.6520 | -40.76 | 601   | -   | 610  | 0 --- | R.LASHHYLYQR.S                       |
| 1439.7417                                                                                                                                                                                                                                                                                                                                                                                                                                                                                                                                                                                                                                                                                                                                                                  | 1438.7344 | 1438.7099 | 17.0   | 1     | -   | 16   | 0 --- | -.MAPVGGGGRPGSGPAR.G + Oxidation (M) |
| 1904.9435                                                                                                                                                                                                                                                                                                                                                                                                                                                                                                                                                                                                                                                                                                                                                                  | 1903.9362 | 1904.0401 | -54.56 | 120   | -   | 137  | 1 --- | K.LVINVRGDTSGMLVLT.K + Oxidation (M) |
| <b>No match to:</b> 834.4748, 842.4698, 848.4878, 850.0129, 850.4987, 853.4788, 862.4257, 864.5128, 865.9851, 868.5118, 870.5065, 876.9959, 882.5245, 882.5245, 892.9658, 951.5779, 960.4399, 977.4595, 977.4595, 996.5483, 1017.6229, 1017.6229, 1019.6358, 1033.6520, 1045.5190, 1051.6609, 1069.4803, 1131.6592, 1133.5562, 1149.5057, 1149.5057, 1151.6812, 1156.5675, 1165.6880, 1165.6880, 1179.5543, 1182.6278, 1182.6278, 1190.5620, 1194.5756, 1212.5294, 1269.6084, 1277.6251, 1300.7948, 1305.5947, 1311.6462, 1311.6462, 1334.8268, 1425.6982, 1448.8599, 1475.6879, 1528.7235, 1617.9976, 1664.7775, 1691.7629, 1695.6990, 1702.7892, 1732.0278, 1839.8657, 1880.9835, 1901.1722, 2015.2070, 2211.0264, 2283.1013, 2682.3079, 2683.2788, 2700.2822, 2700.2822 |           |           |        |       |     |      |       |                                      |

21. [AOA4W2F4Z6](#) Mass: 60709 Score: 42 Expect: 8.1 Matches: 14

Uncharacterized protein OS=Bos indicus x Bos taurus OX=30522 PE=4 SV=1

| Observed                                                                                                                                                                                                                                                                                                                                                                                                                                                                                                                                                                                                                                                                                                   | Mr(expt)  | Mr(calc)  | ppm    | Start | End | Miss | Ions  | Peptide                        |
|------------------------------------------------------------------------------------------------------------------------------------------------------------------------------------------------------------------------------------------------------------------------------------------------------------------------------------------------------------------------------------------------------------------------------------------------------------------------------------------------------------------------------------------------------------------------------------------------------------------------------------------------------------------------------------------------------------|-----------|-----------|--------|-------|-----|------|-------|--------------------------------|
| 848.4878                                                                                                                                                                                                                                                                                                                                                                                                                                                                                                                                                                                                                                                                                                   | 847.4805  | 847.4188  | 72.8   | 521   | -   | 528  | 1 --- | K.SRSSFPFA.-                   |
| 862.4257                                                                                                                                                                                                                                                                                                                                                                                                                                                                                                                                                                                                                                                                                                   | 861.4184  | 861.4742  | -64.76 | 411   | -   | 417  | 1 --- | K.MQKTQVK.C                    |
| 1017.6229                                                                                                                                                                                                                                                                                                                                                                                                                                                                                                                                                                                                                                                                                                  | 1016.6156 | 1016.5729 | 42.1   | 162   | -   | 170  | 0 --- | K.TLLMPFAPK.E                  |
| 1017.6229                                                                                                                                                                                                                                                                                                                                                                                                                                                                                                                                                                                                                                                                                                  | 1016.6156 | 1016.5729 | 42.1   | 162   | -   | 170  | 0 --- | K.TLLMPFAPK.E                  |
| 1033.6520                                                                                                                                                                                                                                                                                                                                                                                                                                                                                                                                                                                                                                                                                                  | 1032.6447 | 1032.5678 | 74.5   | 162   | -   | 170  | 0 --- | K.TLLMPFAPK.E + Oxidation (M)  |
| 1045.5190                                                                                                                                                                                                                                                                                                                                                                                                                                                                                                                                                                                                                                                                                                  | 1044.5117 | 1044.5280 | -15.61 | 381   | -   | 389  | 0 --- | R.SFYSGFGLK.S                  |
| 1156.5675                                                                                                                                                                                                                                                                                                                                                                                                                                                                                                                                                                                                                                                                                                  | 1155.5602 | 1155.5812 | -18.13 | 357   | -   | 365  | 0 --- | R.EEVTFTYQK.L                  |
| 1174.5699                                                                                                                                                                                                                                                                                                                                                                                                                                                                                                                                                                                                                                                                                                  | 1173.5626 | 1173.5414 | 18.1   | 171   | -   | 180  | 0 --- | K.EEGHYLSPSR.S                 |
| 1174.5700                                                                                                                                                                                                                                                                                                                                                                                                                                                                                                                                                                                                                                                                                                  | 1173.5627 | 1173.5414 | 18.1   | 171   | -   | 180  | 0 --- | K.EEGHYLSPSR.S                 |
| 1182.6278                                                                                                                                                                                                                                                                                                                                                                                                                                                                                                                                                                                                                                                                                                  | 1181.6205 | 1181.5057 | 97.2   | 224   | -   | 233  | 0 --- | K.STSMIPDCQK.L + Oxidation (M) |
| 1182.6278                                                                                                                                                                                                                                                                                                                                                                                                                                                                                                                                                                                                                                                                                                  | 1181.6205 | 1181.5057 | 97.2   | 224   | -   | 233  | 0 --- | K.STSMIPDCQK.L + Oxidation (M) |
| 1311.6462                                                                                                                                                                                                                                                                                                                                                                                                                                                                                                                                                                                                                                                                                                  | 1310.6389 | 1310.6367 | 1.66   | 291   | -   | 301  | 1 --- | K.EGHKWDVVEGR.Q                |
| 1311.6462                                                                                                                                                                                                                                                                                                                                                                                                                                                                                                                                                                                                                                                                                                  | 1310.6390 | 1310.6295 | 7.20   | 92    | -   | 101  | 0 --- | K.TLEYTFHWSK.D                 |
| 1425.6982                                                                                                                                                                                                                                                                                                                                                                                                                                                                                                                                                                                                                                                                                                  | 1424.6909 | 1424.7663 | -52.93 | 357   | -   | 367  | 1 --- | R.EEVTFTYQKLR.E                |
| <b>No match to:</b> 834.4748, 842.4698, 850.0129, 850.4987, 853.4788, 864.5128, 865.9851, 868.5118, 870.5065, 876.9959, 882.5245, 882.5245, 892.9658, 951.5779, 960.4399, 977.4595, 977.4595, 996.5483, 1019.6358, 1047.4978, 1047.4978, 1051.6609, 1069.4803, 1131.6592, 1133.5562, 1149.5057, 1149.5057, 1151.6812, 1165.6880, 1165.6880, 1179.5543, 1190.5620, 1194.5756, 1212.5294, 1269.6084, 1277.6251, 1287.6068, 1287.6068, 1300.7948, 1305.5947, 1334.8268, 1439.7417, 1448.8599, 1475.6879, 1528.7235, 1617.9976, 1664.7775, 1691.7629, 1695.6990, 1702.7892, 1732.0278, 1839.8657, 1880.9835, 1901.1722, 1904.9435, 2015.2070, 2211.0264, 2283.1013, 2682.3079, 2683.2788, 2700.2822, 2700.2822 |           |           |        |       |     |      |       |                                |

22. [AOA4W2HZ94](#) Mass: 170798 Score: 42 Expect: 8.5 Matches: 22

Lysine demethylase 2B OS=Bos indicus x Bos taurus OX=30522 GN=KDM2B PE=4 SV=1

| Observed  | Mr(expt)  | Mr(calc)  | ppm    | Start | End | Miss | Ions  | Peptide                       |
|-----------|-----------|-----------|--------|-------|-----|------|-------|-------------------------------|
| 842.4698  | 841.4625  | 841.4698  | -8.61  | 18    | -   | 24   | 0 --- | R.LPVEWAK.L                   |
| 868.5118  | 867.5045  | 867.4199  | 97.6   | 925   | -   | 931  | 1 --- | R.RSDEHPK.K                   |
| 977.4595  | 976.4522  | 976.3920  | 61.7   | 916   | -   | 923  | 0 --- | R.SCEEAAPR.R                  |
| 977.4595  | 976.4523  | 976.3920  | 61.7   | 916   | -   | 923  | 0 9   | R.SCEEAAPR.R                  |
| 1047.4978 | 1046.4905 | 1046.5066 | -15.38 | 471   | -   | 479  | 0 --- | R.ESMLIDAPR.K + Oxidation (M) |
| 1047.4978 | 1046.4905 | 1046.5066 | -15.38 | 471   | -   | 479  | 0 0   | R.ESMLIDAPR.K + Oxidation (M) |
| 1069.4803 | 1068.4730 | 1068.4878 | -13.85 | 730   | -   | 737  | 1 --- | R.MKQSCIMR.Q + Oxidation (M)  |
| 1133.5562 | 1132.5489 | 1132.4931 | 49.3   | 916   | -   | 924  | 1 --- | R.SCEEAAPRR.R                 |
| 1156.5675 | 1155.5602 | 1155.5196 | 35.1   | 243   | -   | 251  | 0 --- | R.YYETPEAQR.D                 |
| 1165.6880 | 1164.6807 | 1164.6437 | 31.7   | 109   | -   | 118  | 0 --- | R.RPPVPIMSR.A + Oxidation (M) |



1165.6880 1164.6807 1164.6437 31.8 109 - 118 0 --- R.RPPVPPIMSR.A + Oxidation (M)  
 1194.5756 1193.5683 1193.6040 -29.91 425 - 433 1 --- R.IYEIEDRTR.V  
 1277.6251 1276.6178 1276.6333 -12.14 221 - 231 0 --- R.LVDVMDVNTQK.G + Oxidation (M)  
 1287.6068 1286.5995 1286.6871 -68.03 1325 - 1335 0 --- R.TLDVQWVEGLK.D  
 1287.6068 1286.5995 1286.6871 -68.02 1325 - 1335 0 --- R.TLDVQWVEGLK.D  
 1300.7948 1299.7875 1299.7584 22.4 1260 - 1271 0 --- K.SITPLMLSGIIR.R  
 1311.6462 1310.6389 1310.7129 -56.44 83 - 95 1 --- K.VAPVPKVGCTGAR.G  
 1311.6462 1310.6390 1310.7129 -56.41 83 - 95 1 --- K.VAPVPKVGCTGAR.G  
 1334.8268 1333.8195 1333.6990 90.4 954 - 964 1 --- K.YEKPQELSGRK.R  
 1702.7892 1701.7819 1701.8111 -17.11 175 - 187 1 --- K.DFNYYVQREALR.V  
 1904.9435 1903.9362 1903.9462 -5.24 1325 - 1340 1 --- R.TLDVQWVEGLKDAQMR.D + Oxidation (M)  
 2683.2788 2682.2715 2682.4817 -78.36 819 - 846 0 --- K.VSAGLQVPGVSPGGVDLGLARPSLSPPR.R  
**No match to:** 834.4748, 848.4878, 850.0129, 850.4987, 853.4788, 862.4257, 864.5128, 865.9851, 870.5065, 876.9959, 882.5245, 882.5245, 892.9658, 951.5779, 960.4399, 996.5483, 1017.6229, 1017.6229, 1019.6358, 1033.6520, 1045.5190, 1051.6609, 1131.6592, 1149.5057, 1149.5057, 1151.6812, 1174.5699, 1174.5700, 1179.5543, 1182.6278, 1182.6278, 1190.5620, 1212.5294, 1269.6084, 1305.5947, 1425.6982, 1439.7417, 1448.8599, 1475.6879, 1528.7235, 1617.9976, 1664.7775, 1691.7629, 1695.6990, 1732.0278, 1839.8657, 1880.9835, 1901.1722, 2015.2070, 2211.0264, 2283.1013, 2682.3079, 2700.2822, 2700.2822

23. **A0A3Q1MCG0** Mass: 472745 Score: 42 Expect: 9.5 Matches: 29

Dynein axonemal heavy chain 6 OS=Bos taurus OX=9913 GN=DNAH6 PE=4 SV=1

| Observed                                                                                                                                                                                                                                                                                                                                                                                                                                                                                                                                   | Mr(expt)  | Mr(calc)  | ppm    | Start | End | Miss | Ions | Peptide                                 |
|--------------------------------------------------------------------------------------------------------------------------------------------------------------------------------------------------------------------------------------------------------------------------------------------------------------------------------------------------------------------------------------------------------------------------------------------------------------------------------------------------------------------------------------------|-----------|-----------|--------|-------|-----|------|------|-----------------------------------------|
| 834.4748                                                                                                                                                                                                                                                                                                                                                                                                                                                                                                                                   | 833.4675  | 833.4647  | 3.40   | 1732  | -   | 1738 | 0    | K.TYVLNPK.S                             |
| 848.4878                                                                                                                                                                                                                                                                                                                                                                                                                                                                                                                                   | 847.4805  | 847.4334  | 55.6   | 2379  | -   | 2384 | 1    | R.MIRQER.G + Oxidation (M)              |
| 864.5128                                                                                                                                                                                                                                                                                                                                                                                                                                                                                                                                   | 863.5055  | 863.4753  | 35.0   | 925   | -   | 931  | 0    | K.FVTQLEK.G                             |
| 868.5118                                                                                                                                                                                                                                                                                                                                                                                                                                                                                                                                   | 867.5045  | 867.4464  | 67.1   | 649   | -   | 654  | 1    | K.YHRQHK.D                              |
| 960.4399                                                                                                                                                                                                                                                                                                                                                                                                                                                                                                                                   | 959.4326  | 959.4672  | -36.05 | 2493  | -   | 2501 | 0    | K.EVGISEGNNR.D                          |
| 977.4595                                                                                                                                                                                                                                                                                                                                                                                                                                                                                                                                   | 976.4522  | 976.5012  | -50.11 | 1758  | -   | 1766 | 0    | K.DGLMALSVR.A + Oxidation (M)           |
| 977.4595                                                                                                                                                                                                                                                                                                                                                                                                                                                                                                                                   | 976.4523  | 976.5012  | -50.08 | 1758  | -   | 1766 | 0    | K.DGLMALSVR.A + Oxidation (M)           |
| 1045.5190                                                                                                                                                                                                                                                                                                                                                                                                                                                                                                                                  | 1044.5117 | 1044.5451 | -31.97 | 3972  | -   | 3981 | 0    | R.DQATVIEAAK.T                          |
| 1131.6592                                                                                                                                                                                                                                                                                                                                                                                                                                                                                                                                  | 1130.6519 | 1130.5608 | 80.6   | 232   | -   | 240  | 1    | K.NDYITISK.K.A                          |
| 1149.5057                                                                                                                                                                                                                                                                                                                                                                                                                                                                                                                                  | 1148.4984 | 1148.4855 | 11.2   | 2268  | -   | 2275 | 0    | R.LFCHCEQR.V                            |
| 1149.5057                                                                                                                                                                                                                                                                                                                                                                                                                                                                                                                                  | 1148.4985 | 1148.4855 | 11.3   | 2268  | -   | 2275 | 0    | R.LFCHCEQR.V                            |
| 1156.5675                                                                                                                                                                                                                                                                                                                                                                                                                                                                                                                                  | 1155.5602 | 1155.5746 | -12.48 | 1499  | -   | 1507 | 1    | R.FMFEGREIK.L                           |
| 1182.6278                                                                                                                                                                                                                                                                                                                                                                                                                                                                                                                                  | 1181.6205 | 1181.5750 | 38.5   | 1280  | -   | 1289 | 0    | K.VEEAMFTSLR.R                          |
| 1182.6278                                                                                                                                                                                                                                                                                                                                                                                                                                                                                                                                  | 1181.6205 | 1181.5750 | 38.5   | 1280  | -   | 1289 | 0    | K.VEEAMFTSLR.R                          |
| 1287.6068                                                                                                                                                                                                                                                                                                                                                                                                                                                                                                                                  | 1286.5995 | 1286.7207 | -94.20 | 1205  | -   | 1215 | 1    | R.NPQAVQPHLRK.C                         |
| 1287.6068                                                                                                                                                                                                                                                                                                                                                                                                                                                                                                                                  | 1286.5995 | 1286.7207 | -94.19 | 1205  | -   | 1215 | 1    | R.NPQAVQPHLRK.C                         |
| 1425.6982                                                                                                                                                                                                                                                                                                                                                                                                                                                                                                                                  | 1424.6909 | 1424.7088 | -12.57 | 3329  | -   | 3339 | 0    | R.LTEAEWNFFLR.G                         |
| 1439.7417                                                                                                                                                                                                                                                                                                                                                                                                                                                                                                                                  | 1438.7344 | 1438.6472 | 60.6   | 1837  | -   | 1848 | 0    | R.CGMVFVDPEELK.W + Oxidation (M)        |
| 1448.8599                                                                                                                                                                                                                                                                                                                                                                                                                                                                                                                                  | 1447.8526 | 1447.9238 | -49.18 | 1355  | -   | 1368 | 1    | R.LNALAAIVRGILPK.L                      |
| 1475.6879                                                                                                                                                                                                                                                                                                                                                                                                                                                                                                                                  | 1474.6806 | 1474.7701 | -60.67 | 2851  | -   | 2864 | 0    | R.AAQAEIDITMATLK.E                      |
| 1528.7235                                                                                                                                                                                                                                                                                                                                                                                                                                                                                                                                  | 1527.7162 | 1527.8046 | -57.81 | 1030  | -   | 1042 | 1    | K.TTEFVVLPHRDSK.D                       |
| 1617.9976                                                                                                                                                                                                                                                                                                                                                                                                                                                                                                                                  | 1616.9903 | 1616.8596 | 80.9   | 1119  | -   | 1132 | 1    | R.QLPAEAKMFLQVSK.S                      |
| 1664.7775                                                                                                                                                                                                                                                                                                                                                                                                                                                                                                                                  | 1663.7702 | 1663.9185 | -89.12 | 3449  | -   | 3463 | 0    | K.VVFALTDVFVLENLKG.A                    |
| 1691.7629                                                                                                                                                                                                                                                                                                                                                                                                                                                                                                                                  | 1690.7556 | 1690.8414 | -50.71 | 907   | -   | 921  | 0    | K.FDSLDPPELLNSQVSK.Y                    |
| 1880.9835                                                                                                                                                                                                                                                                                                                                                                                                                                                                                                                                  | 1879.9762 | 1879.9138 | 33.2   | 4087  | -   | 4102 | 1    | K.DYWIAKGSALLCQLNE.-                    |
| 1901.1722                                                                                                                                                                                                                                                                                                                                                                                                                                                                                                                                  | 1900.1649 | 1900.0319 | 70.0   | 2363  | -   | 2378 | 1    | K.LVFFQDAIEHVSRIAR.M                    |
| 2211.0264                                                                                                                                                                                                                                                                                                                                                                                                                                                                                                                                  | 2210.0191 | 2210.0677 | -22.00 | 1271  | -   | 1289 | 1    | R.GNVEEWLGKVEEAMFTSLR.R + Oxidation (M) |
| 2682.3079                                                                                                                                                                                                                                                                                                                                                                                                                                                                                                                                  | 2681.3006 | 2681.3871 | -32.27 | 3140  | -   | 3162 | 1    | K.SGLEDDQLSDVVRLEKPELEEQR.I             |
| 2683.2788                                                                                                                                                                                                                                                                                                                                                                                                                                                                                                                                  | 2682.2715 | 2682.3725 | -37.66 | 2994  | -   | 3017 | 1    | R.QWNTDGLPRDLISTENGILVTQGR.R            |
| <b>No match to:</b> 842.4698, 850.0129, 850.4987, 853.4788, 862.4257, 865.9851, 870.5065, 876.9959, 882.5245, 882.5245, 892.9658, 951.5779, 996.5483, 1017.6229, 1017.6229, 1019.6358, 1033.6520, 1047.4978, 1047.4978, 1051.6609, 1069.4803, 1133.5562, 1151.6812, 1165.6880, 1165.6880, 1174.5699, 1174.5700, 1179.5543, 1190.5620, 1194.5756, 1212.5294, 1269.6084, 1277.6251, 1300.7948, 1305.5947, 1311.6462, 1311.6462, 1334.8268, 1695.6990, 1702.7892, 1732.0278, 1839.8657, 1904.9435, 2015.2070, 2283.1013, 2700.2822, 2700.2822 |           |           |        |       |     |      |      |                                         |

24. **A0A4W2GJX2** Mass: 108528 Score: 40 Expect: 12 Matches: 17

Nebulette OS=Bos indicus x Bos taurus OX=30522 GN=NEBL PE=4 SV=1

| Observed                                                                                                                                                                                                                                                                                                                                                                                                                                                                                                                                                                                                                                                                             | Mr(expt)  | Mr(calc)  | ppm    | Start | End | Miss | Ions | Peptide                                     |
|--------------------------------------------------------------------------------------------------------------------------------------------------------------------------------------------------------------------------------------------------------------------------------------------------------------------------------------------------------------------------------------------------------------------------------------------------------------------------------------------------------------------------------------------------------------------------------------------------------------------------------------------------------------------------------------|-----------|-----------|--------|-------|-----|------|------|---------------------------------------------|
| 864.5128                                                                                                                                                                                                                                                                                                                                                                                                                                                                                                                                                                                                                                                                             | 863.5055  | 863.5116  | -7.07  | 329   | -   | 335  | 0    | K.YITNLLK.E                                 |
| 960.4399                                                                                                                                                                                                                                                                                                                                                                                                                                                                                                                                                                                                                                                                             | 959.4326  | 959.4746  | -43.74 | 792   | -   | 799  | 0    | R.SLHMLSEK.A + Oxidation (M)                |
| 996.5483                                                                                                                                                                                                                                                                                                                                                                                                                                                                                                                                                                                                                                                                             | 995.5410  | 995.4923  | 48.9   | 825   | -   | 832  | 0    | K.SEISEIYR.S                                |
| 1017.6229                                                                                                                                                                                                                                                                                                                                                                                                                                                                                                                                                                                                                                                                            | 1016.6156 | 1016.5251 | 89.1   | 544   | -   | 552  | 0    | K.NQQNISSVK.Y                               |
| 1017.6229                                                                                                                                                                                                                                                                                                                                                                                                                                                                                                                                                                                                                                                                            | 1016.6156 | 1016.5251 | 89.1   | 544   | -   | 552  | 0    | K.NQQNISSVK.Y                               |
| 1045.5190                                                                                                                                                                                                                                                                                                                                                                                                                                                                                                                                                                                                                                                                            | 1044.5117 | 1044.5451 | -31.96 | 453   | -   | 461  | 1    | K.DLENEIKGK.G                               |
| 1069.4803                                                                                                                                                                                                                                                                                                                                                                                                                                                                                                                                                                                                                                                                            | 1068.4730 | 1068.5134 | -37.83 | 876   | -   | 884  | 0    | R.SMOHSPNLR.T                               |
| 1179.5543                                                                                                                                                                                                                                                                                                                                                                                                                                                                                                                                                                                                                                                                            | 1178.5470 | 1178.4575 | 76.0   | 18    | -   | 27   | 0    | K.TGEEENEEDK.V                              |
| 1269.6084                                                                                                                                                                                                                                                                                                                                                                                                                                                                                                                                                                                                                                                                            | 1268.6011 | 1268.6612 | -47.36 | 621   | -   | 632  | 0    | K.QATAISDPPELK.R                            |
| 1287.6068                                                                                                                                                                                                                                                                                                                                                                                                                                                                                                                                                                                                                                                                            | 1286.5995 | 1286.5812 | 14.2   | 441   | -   | 451  | 1    | K.ASEMASQKEYK.K + Oxidation (M)             |
| 1287.6068                                                                                                                                                                                                                                                                                                                                                                                                                                                                                                                                                                                                                                                                            | 1286.5995 | 1286.5812 | 14.2   | 441   | -   | 451  | 1    | K.ASEMASQKEYK.K + Oxidation (M)             |
| 1305.5947                                                                                                                                                                                                                                                                                                                                                                                                                                                                                                                                                                                                                                                                            | 1304.5874 | 1304.6296 | -32.30 | 750   | -   | 760  | 0    | K.GVHPHIVEMDR.R + Oxidation (M)             |
| 1425.6982                                                                                                                                                                                                                                                                                                                                                                                                                                                                                                                                                                                                                                                                            | 1424.6909 | 1424.7623 | -50.11 | 621   | -   | 633  | 1    | K.QATAISDPPELKR.V                           |
| 1664.7775                                                                                                                                                                                                                                                                                                                                                                                                                                                                                                                                                                                                                                                                            | 1663.7702 | 1663.8199 | -29.88 | 423   | -   | 437  | 1    | R.GKGMQVSTDTLDIQR.A + Oxidation (M)         |
| 1691.7629                                                                                                                                                                                                                                                                                                                                                                                                                                                                                                                                                                                                                                                                            | 1690.7556 | 1690.8204 | -38.34 | 462   | -   | 476  | 1    | K.GMQVSMIDPMLRAK.R                          |
| 1702.7892                                                                                                                                                                                                                                                                                                                                                                                                                                                                                                                                                                                                                                                                            | 1701.7819 | 1701.8719 | -52.89 | 351   | -   | 365  | 1    | K.GMELNSEVLDIQRAK.R                         |
| 2682.3079                                                                                                                                                                                                                                                                                                                                                                                                                                                                                                                                                                                                                                                                            | 2681.3006 | 2681.3231 | -8.40  | 200   | -   | 224  | 1    | K.GQGVNMKEPAVIGRPDFEHAASK.L + Oxidation (M) |
| <b>No match to:</b> 834.4748, 842.4698, 848.4878, 850.0129, 850.4987, 853.4788, 862.4257, 865.9851, 868.5118, 870.5065, 876.9959, 882.5245, 882.5245, 892.9658, 951.5779, 977.4595, 977.4595, 977.4595, 1019.6358, 1033.6520, 1047.4978, 1047.4978, 1051.6609, 1131.6592, 1133.5562, 1149.5057, 1149.5057, 1151.6812, 1156.5675, 1165.6880, 1165.6880, 1174.5699, 1174.5700, 1182.6278, 1182.6278, 1190.5620, 1194.5756, 1212.5294, 1277.6251, 1300.7948, 1311.6462, 1311.6462, 1334.8268, 1439.7417, 1448.8599, 1475.6879, 1528.7235, 1617.9976, 1695.6990, 1732.0278, 1839.8657, 1880.9835, 1901.1722, 1904.9435, 2015.2070, 2211.0264, 2283.1013, 2683.2788, 2700.2822, 2700.2822 |           |           |        |       |     |      |      |                                             |

25. **A0A4W2EAZ9** Mass: 473215 Score: 40 Expect: 13 Matches: 29

Dynein axonemal heavy chain 6 OS=Bos indicus x Bos taurus OX=30522 GN=DNAH6 PE=4 SV=1

| Observed  | Mr(expt)  | Mr(calc)  | ppm    | Start | End | Miss | Ions | Peptide                       |
|-----------|-----------|-----------|--------|-------|-----|------|------|-------------------------------|
| 834.4748  | 833.4675  | 833.4647  | 3.40   | 1784  | -   | 1790 | 0    | K.TYVLNPK.S                   |
| 848.4878  | 847.4805  | 847.4334  | 55.6   | 2431  | -   | 2436 | 1    | R.MIRQER.G + Oxidation (M)    |
| 864.5128  | 863.5055  | 863.4753  | 35.0   | 925   | -   | 931  | 0    | K.FVTQLEK.G                   |
| 868.5118  | 867.5045  | 867.4464  | 67.1   | 649   | -   | 654  | 1    | K.YHRQHK.D                    |
| 960.4399  | 959.4326  | 959.4672  | -36.05 | 2545  | -   | 2553 | 0    | K.EVGISEGNNR.D                |
| 977.4595  | 976.4522  | 976.5012  | -50.11 | 1810  | -   | 1818 | 0    | K.DGLMALSVR.A + Oxidation (M) |
| 977.4595  | 976.4523  | 976.5012  | -50.08 | 1810  | -   | 1818 | 0    | K.DGLMALSVR.A + Oxidation (M) |
| 1045.5190 | 1044.5117 | 1044.5451 | -31.97 | 3977  | -   | 3986 | 0    | R.DQATVIEAAK.T                |





|                                                                                                                                                                                                                                                                                                                                                                                                                                                                                                                          |           |           |        |      |   |      |   |     |                                         |
|--------------------------------------------------------------------------------------------------------------------------------------------------------------------------------------------------------------------------------------------------------------------------------------------------------------------------------------------------------------------------------------------------------------------------------------------------------------------------------------------------------------------------|-----------|-----------|--------|------|---|------|---|-----|-----------------------------------------|
| 1131.6592                                                                                                                                                                                                                                                                                                                                                                                                                                                                                                                | 1130.6519 | 1130.5608 | 80.6   | 232  | - | 240  | 1 | --- | K.NDYITISKK.A                           |
| 1149.5057                                                                                                                                                                                                                                                                                                                                                                                                                                                                                                                | 1148.4984 | 1148.4855 | 11.2   | 2320 | - | 2327 | 0 | --- | R.LFCHQCQR.V                            |
| 1149.5057                                                                                                                                                                                                                                                                                                                                                                                                                                                                                                                | 1148.4985 | 1148.4855 | 11.3   | 2320 | - | 2327 | 0 | --- | R.LFCHQCQR.V                            |
| 1156.5675                                                                                                                                                                                                                                                                                                                                                                                                                                                                                                                | 1155.5602 | 1155.5746 | -12.48 | 1551 | - | 1559 | 1 | --- | R.FMFEGREIK.L                           |
| 1182.6278                                                                                                                                                                                                                                                                                                                                                                                                                                                                                                                | 1181.6205 | 1181.5750 | 38.5   | 1280 | - | 1289 | 0 | --- | K.VEEAMFTSLR.R                          |
| 1182.6278                                                                                                                                                                                                                                                                                                                                                                                                                                                                                                                | 1181.6205 | 1181.5750 | 38.5   | 1280 | - | 1289 | 0 | 5   | K.VEEAMFTSLR.R                          |
| 1287.6068                                                                                                                                                                                                                                                                                                                                                                                                                                                                                                                | 1286.5995 | 1286.7207 | -94.20 | 1205 | - | 1215 | 1 | --- | R.NPQAVQPHLRK.C                         |
| 1287.6068                                                                                                                                                                                                                                                                                                                                                                                                                                                                                                                | 1286.5995 | 1286.7207 | -94.19 | 1205 | - | 1215 | 1 | --- | R.NPQAVQPHLRK.C                         |
| 1425.6982                                                                                                                                                                                                                                                                                                                                                                                                                                                                                                                | 1424.6909 | 1424.7088 | -12.57 | 3334 | - | 3344 | 0 | --- | R.LTAEAWNFFLR.G                         |
| 1439.7417                                                                                                                                                                                                                                                                                                                                                                                                                                                                                                                | 1438.7344 | 1438.6472 | 60.6   | 1889 | - | 1900 | 0 | --- | R.CGMVFVDPEELK.W + Oxidation (M)        |
| 1448.8599                                                                                                                                                                                                                                                                                                                                                                                                                                                                                                                | 1447.8526 | 1447.9238 | -49.18 | 1355 | - | 1368 | 1 | --- | R.LNALAAIVRGILPK.L                      |
| 1475.6879                                                                                                                                                                                                                                                                                                                                                                                                                                                                                                                | 1474.6806 | 1474.7701 | -60.67 | 2856 | - | 2869 | 0 | --- | R.AAQAELEDITMATLK.E                     |
| 1528.7235                                                                                                                                                                                                                                                                                                                                                                                                                                                                                                                | 1527.7162 | 1527.8046 | -57.81 | 1030 | - | 1042 | 1 | --- | K.TTEFVVLPHRDSK.D                       |
| 1617.9976                                                                                                                                                                                                                                                                                                                                                                                                                                                                                                                | 1616.9903 | 1616.8596 | 80.9   | 1119 | - | 1132 | 1 | --- | R.QLPAEAKMFLQVDK.S                      |
| 1664.7775                                                                                                                                                                                                                                                                                                                                                                                                                                                                                                                | 1663.7702 | 1663.9185 | -89.12 | 3454 | - | 3468 | 0 | --- | K.VVFALTDVFVIENTLKG.A                   |
| 1691.7629                                                                                                                                                                                                                                                                                                                                                                                                                                                                                                                | 1690.7556 | 1690.8414 | -50.71 | 907  | - | 921  | 0 | --- | K.FDSLDPPELLNSQVSK.Y                    |
| 1880.9835                                                                                                                                                                                                                                                                                                                                                                                                                                                                                                                | 1879.9762 | 1879.9138 | 33.2   | 4092 | - | 4107 | 1 | --- | K.DYWIAKGSALLCQLNE.-                    |
| 1901.1722                                                                                                                                                                                                                                                                                                                                                                                                                                                                                                                | 1900.1649 | 1900.0319 | 70.0   | 2415 | - | 2430 | 1 | --- | K.LVFFQDAIEHVSRIAR.M                    |
| 2211.0264                                                                                                                                                                                                                                                                                                                                                                                                                                                                                                                | 2210.0191 | 2210.0677 | -22.00 | 1271 | - | 1289 | 1 | --- | R.GNVEEVLGKVEEAMFTSLR.R + Oxidation (M) |
| 2682.3079                                                                                                                                                                                                                                                                                                                                                                                                                                                                                                                | 2681.3006 | 2681.3871 | -32.27 | 3145 | - | 3167 | 1 | --- | K.SGLEDDLSDVVRLEKPELEEQR.I              |
| 2683.2788                                                                                                                                                                                                                                                                                                                                                                                                                                                                                                                | 2682.2715 | 2682.3725 | -37.66 | 2999 | - | 3022 | 1 | --- | R.QWNTDGLPRDLISTENGILVTQGR.R            |
| No match to: 842.4698, 850.0129, 850.4987, 853.4788, 862.4257, 865.9851, 870.5065, 876.9959, 882.5245, 882.5245, 892.9658, 951.5779, 996.5483, 1017.6229, 1017.6229, 1019.6358, 1033.6520, 1047.4978, 1047.4978, 1051.6609, 1069.4803, 1133.5562, 1151.6812, 1165.6880, 1174.5699, 1174.5700, 1179.5543, 1190.5620, 1194.5756, 1212.5294, 1269.6084, 1277.6251, 1300.7948, 1305.5947, 1311.6462, 1311.6462, 1334.8268, 1695.6990, 1702.7892, 1732.0278, 1839.8657, 1904.9435, 2015.2070, 2283.1013, 2700.2822, 2700.2822 |           |           |        |      |   |      |   |     |                                         |

|                                                                                                                                                                                                                                                                                                                                                                                                                                                                                                                                                                                                                                                          |                            |              |           |            |                                                           |
|----------------------------------------------------------------------------------------------------------------------------------------------------------------------------------------------------------------------------------------------------------------------------------------------------------------------------------------------------------------------------------------------------------------------------------------------------------------------------------------------------------------------------------------------------------------------------------------------------------------------------------------------------------|----------------------------|--------------|-----------|------------|-----------------------------------------------------------|
| 26.                                                                                                                                                                                                                                                                                                                                                                                                                                                                                                                                                                                                                                                      | <a href="#">A0A4W2CJRO</a> | Mass: 108457 | Score: 40 | Expect: 13 | Matches: 17                                               |
| Nebulette OS=Bos indicus x Bos taurus OX=30522 GN=NEBL PE=4 SV=1                                                                                                                                                                                                                                                                                                                                                                                                                                                                                                                                                                                         |                            |              |           |            |                                                           |
| Observed                                                                                                                                                                                                                                                                                                                                                                                                                                                                                                                                                                                                                                                 | Mr(expt)                   | Mr(calc)     | ppm       | Start      | End Miss Ions Peptide                                     |
| 864.5128                                                                                                                                                                                                                                                                                                                                                                                                                                                                                                                                                                                                                                                 | 863.5055                   | 863.5116     | -7.07     | 329        | - 335 0 --- K.YITNLLK.E                                   |
| 960.4399                                                                                                                                                                                                                                                                                                                                                                                                                                                                                                                                                                                                                                                 | 959.4326                   | 959.4746     | -43.74    | 792        | - 799 0 --- R.SLHMLSEK.A + Oxidation (M)                  |
| 996.5483                                                                                                                                                                                                                                                                                                                                                                                                                                                                                                                                                                                                                                                 | 995.5410                   | 995.4923     | 48.9      | 825        | - 832 0 --- K.SEISEIYR.S                                  |
| 1017.6229                                                                                                                                                                                                                                                                                                                                                                                                                                                                                                                                                                                                                                                | 1016.6156                  | 1016.5251    | 89.1      | 544        | - 552 0 --- K.NQONISSVK.Y                                 |
| 1017.6229                                                                                                                                                                                                                                                                                                                                                                                                                                                                                                                                                                                                                                                | 1016.6156                  | 1016.5251    | 89.1      | 544        | - 552 0 --- K.NQONISSVK.Y                                 |
| 1045.5190                                                                                                                                                                                                                                                                                                                                                                                                                                                                                                                                                                                                                                                | 1044.5117                  | 1044.5451    | -31.96    | 453        | - 461 1 --- K.DLENEIKGK.G                                 |
| 1069.4803                                                                                                                                                                                                                                                                                                                                                                                                                                                                                                                                                                                                                                                | 1068.4730                  | 1068.5134    | -37.83    | 876        | - 884 0 --- R.SMQHSPNLR.T                                 |
| 1179.5543                                                                                                                                                                                                                                                                                                                                                                                                                                                                                                                                                                                                                                                | 1178.5470                  | 1178.4575    | 76.0      | 18         | - 27 0 --- K.TGEEENEEDK.V                                 |
| 1269.6084                                                                                                                                                                                                                                                                                                                                                                                                                                                                                                                                                                                                                                                | 1268.6011                  | 1268.6612    | -47.36    | 621        | - 632 0 --- K.QATAISDPPELK.R                              |
| 1287.6068                                                                                                                                                                                                                                                                                                                                                                                                                                                                                                                                                                                                                                                | 1286.5995                  | 1286.5812    | 14.2      | 441        | - 451 1 --- K.ASEMASQKEYK.K + Oxidation (M)               |
| 1287.6068                                                                                                                                                                                                                                                                                                                                                                                                                                                                                                                                                                                                                                                | 1286.5995                  | 1286.5812    | 14.2      | 441        | - 451 1 --- K.ASEMASQKEYK.K + Oxidation (M)               |
| 1305.5947                                                                                                                                                                                                                                                                                                                                                                                                                                                                                                                                                                                                                                                | 1304.5874                  | 1304.6296    | -32.30    | 750        | - 760 0 --- K.GVHPHIVEMDR.R + Oxidation (M)               |
| 1425.6982                                                                                                                                                                                                                                                                                                                                                                                                                                                                                                                                                                                                                                                | 1424.6909                  | 1424.7623    | -50.11    | 621        | - 633 1 --- K.QATAISDPPELK.R.V                            |
| 1664.7775                                                                                                                                                                                                                                                                                                                                                                                                                                                                                                                                                                                                                                                | 1663.7702                  | 1663.8199    | -29.88    | 423        | - 437 1 --- R.GKGQMVSTDTLTIQR.A + Oxidation (M)           |
| 1691.7629                                                                                                                                                                                                                                                                                                                                                                                                                                                                                                                                                                                                                                                | 1690.7556                  | 1690.8204    | -38.34    | 462        | - 476 1 --- K.GMQVSMIDIPDMLRAK.R                          |
| 1702.7892                                                                                                                                                                                                                                                                                                                                                                                                                                                                                                                                                                                                                                                | 1701.7819                  | 1701.8719    | -52.89    | 351        | - 365 1 --- K.GMELNSEVLDIQR.AK.R                          |
| 2682.3079                                                                                                                                                                                                                                                                                                                                                                                                                                                                                                                                                                                                                                                | 2681.3006                  | 2681.3231    | -8.40     | 200        | - 224 1 --- K.GQGVMNKEPAVIGRPDPEHAVEASK.L + Oxidation (M) |
| No match to: 834.4748, 842.4698, 848.4878, 850.0129, 850.4987, 853.4788, 862.4257, 865.9851, 868.5118, 870.5065, 876.9959, 882.5245, 882.5245, 892.9658, 951.5779, 977.4595, 977.4595, 1019.6358, 1033.6520, 1047.4978, 1047.4978, 1051.6609, 1131.6592, 1133.5562, 1149.5057, 1151.6812, 1156.5675, 1165.6880, 1165.6880, 1174.5699, 1174.5700, 1182.6278, 1182.6278, 1190.5620, 1194.5756, 1212.5294, 1277.6251, 1300.7948, 1311.6462, 1311.6462, 1334.8268, 1439.7417, 1448.8599, 1475.6879, 1528.7235, 1617.9976, 1695.6990, 1732.0278, 1839.8657, 1880.9835, 1901.1722, 1904.9435, 2015.2070, 2211.0264, 2283.1013, 2683.2788, 2700.2822, 2700.2822 |                            |              |           |            |                                                           |

|                                                                                                                                                                                                                                                                                                                                                                                                                                                                                                                                                                                                                                                          |                            |              |           |            |                                                           |
|----------------------------------------------------------------------------------------------------------------------------------------------------------------------------------------------------------------------------------------------------------------------------------------------------------------------------------------------------------------------------------------------------------------------------------------------------------------------------------------------------------------------------------------------------------------------------------------------------------------------------------------------------------|----------------------------|--------------|-----------|------------|-----------------------------------------------------------|
| 27.                                                                                                                                                                                                                                                                                                                                                                                                                                                                                                                                                                                                                                                      | <a href="#">A0A3Q1MXR2</a> | Mass: 108457 | Score: 40 | Expect: 13 | Matches: 17                                               |
| Nebulette OS=Bos taurus OX=9913 GN=NEBL PE=4 SV=1                                                                                                                                                                                                                                                                                                                                                                                                                                                                                                                                                                                                        |                            |              |           |            |                                                           |
| Observed                                                                                                                                                                                                                                                                                                                                                                                                                                                                                                                                                                                                                                                 | Mr(expt)                   | Mr(calc)     | ppm       | Start      | End Miss Ions Peptide                                     |
| 864.5128                                                                                                                                                                                                                                                                                                                                                                                                                                                                                                                                                                                                                                                 | 863.5055                   | 863.5116     | -7.07     | 329        | - 335 0 --- K.YITNLLK.E                                   |
| 960.4399                                                                                                                                                                                                                                                                                                                                                                                                                                                                                                                                                                                                                                                 | 959.4326                   | 959.4746     | -43.74    | 792        | - 799 0 --- R.SLHMLSEK.A + Oxidation (M)                  |
| 996.5483                                                                                                                                                                                                                                                                                                                                                                                                                                                                                                                                                                                                                                                 | 995.5410                   | 995.4923     | 48.9      | 825        | - 832 0 --- K.SEISEIYR.S                                  |
| 1017.6229                                                                                                                                                                                                                                                                                                                                                                                                                                                                                                                                                                                                                                                | 1016.6156                  | 1016.5251    | 89.1      | 544        | - 552 0 --- K.NQONISSVK.Y                                 |
| 1017.6229                                                                                                                                                                                                                                                                                                                                                                                                                                                                                                                                                                                                                                                | 1016.6156                  | 1016.5251    | 89.1      | 544        | - 552 0 --- K.NQONISSVK.Y                                 |
| 1045.5190                                                                                                                                                                                                                                                                                                                                                                                                                                                                                                                                                                                                                                                | 1044.5117                  | 1044.5451    | -31.96    | 453        | - 461 1 --- K.DLENEIKGK.G                                 |
| 1069.4803                                                                                                                                                                                                                                                                                                                                                                                                                                                                                                                                                                                                                                                | 1068.4730                  | 1068.5134    | -37.83    | 876        | - 884 0 --- R.SMQHSPNLR.T                                 |
| 1179.5543                                                                                                                                                                                                                                                                                                                                                                                                                                                                                                                                                                                                                                                | 1178.5470                  | 1178.4575    | 76.0      | 18         | - 27 0 --- K.TGEEENEEDK.V                                 |
| 1269.6084                                                                                                                                                                                                                                                                                                                                                                                                                                                                                                                                                                                                                                                | 1268.6011                  | 1268.6612    | -47.36    | 621        | - 632 0 --- K.QATAISDPPELK.R                              |
| 1287.6068                                                                                                                                                                                                                                                                                                                                                                                                                                                                                                                                                                                                                                                | 1286.5995                  | 1286.5812    | 14.2      | 441        | - 451 1 --- K.ASEMASQKEYK.K + Oxidation (M)               |
| 1287.6068                                                                                                                                                                                                                                                                                                                                                                                                                                                                                                                                                                                                                                                | 1286.5995                  | 1286.5812    | 14.2      | 441        | - 451 1 --- K.ASEMASQKEYK.K + Oxidation (M)               |
| 1305.5947                                                                                                                                                                                                                                                                                                                                                                                                                                                                                                                                                                                                                                                | 1304.5874                  | 1304.6296    | -32.30    | 750        | - 760 0 --- K.GVHPHIVEMDR.R + Oxidation (M)               |
| 1425.6982                                                                                                                                                                                                                                                                                                                                                                                                                                                                                                                                                                                                                                                | 1424.6909                  | 1424.7623    | -50.11    | 621        | - 633 1 --- K.QATAISDPPELK.R.V                            |
| 1664.7775                                                                                                                                                                                                                                                                                                                                                                                                                                                                                                                                                                                                                                                | 1663.7702                  | 1663.8199    | -29.88    | 423        | - 437 1 --- R.GKGQMVSTDTLTIQR.A + Oxidation (M)           |
| 1691.7629                                                                                                                                                                                                                                                                                                                                                                                                                                                                                                                                                                                                                                                | 1690.7556                  | 1690.8204    | -38.34    | 462        | - 476 1 --- K.GMQVSMIDIPDMLRAK.R                          |
| 1702.7892                                                                                                                                                                                                                                                                                                                                                                                                                                                                                                                                                                                                                                                | 1701.7819                  | 1701.8719    | -52.89    | 351        | - 365 1 --- K.GMELNSEVLDIQR.AK.R                          |
| 2682.3079                                                                                                                                                                                                                                                                                                                                                                                                                                                                                                                                                                                                                                                | 2681.3006                  | 2681.3231    | -8.40     | 200        | - 224 1 --- K.GQGVMNKEPAVIGRPDPEHAVEASK.L + Oxidation (M) |
| No match to: 834.4748, 842.4698, 848.4878, 850.0129, 850.4987, 853.4788, 862.4257, 865.9851, 868.5118, 870.5065, 876.9959, 882.5245, 882.5245, 892.9658, 951.5779, 977.4595, 977.4595, 1019.6358, 1033.6520, 1047.4978, 1047.4978, 1051.6609, 1131.6592, 1133.5562, 1149.5057, 1151.6812, 1156.5675, 1165.6880, 1165.6880, 1174.5699, 1174.5700, 1182.6278, 1182.6278, 1190.5620, 1194.5756, 1212.5294, 1277.6251, 1300.7948, 1311.6462, 1311.6462, 1334.8268, 1439.7417, 1448.8599, 1475.6879, 1528.7235, 1617.9976, 1695.6990, 1732.0278, 1839.8657, 1880.9835, 1901.1722, 1904.9435, 2015.2070, 2211.0264, 2283.1013, 2683.2788, 2700.2822, 2700.2822 |                            |              |           |            |                                                           |

|                                                                  |                            |              |           |            |                                             |
|------------------------------------------------------------------|----------------------------|--------------|-----------|------------|---------------------------------------------|
| 28.                                                              | <a href="#">A0A4W2GHX5</a> | Mass: 112926 | Score: 40 | Expect: 14 | Matches: 17                                 |
| Nebulette OS=Bos indicus x Bos taurus OX=30522 GN=NEBL PE=4 SV=1 |                            |              |           |            |                                             |
| Observed                                                         | Mr(expt)                   | Mr(calc)     | ppm       | Start      | End Miss Ions Peptide                       |
| 864.5128                                                         | 863.5055                   | 863.5116     | -7.07     | 367        | - 373 0 --- K.YITNLLK.E                     |
| 960.4399                                                         | 959.4326                   | 959.4746     | -43.74    | 830        | - 837 0 --- R.SLHMLSEK.A + Oxidation (M)    |
| 996.5483                                                         | 995.5410                   | 995.4923     | 48.9      | 863        | - 870 0 --- K.SEISEIYR.S                    |
| 1017.6229                                                        | 1016.6156                  | 1016.5251    | 89.1      | 582        | - 590 0 --- K.NQONISSVK.Y                   |
| 1017.6229                                                        | 1016.6156                  | 1016.5251    | 89.1      | 582        | - 590 0 --- K.NQONISSVK.Y                   |
| 1045.5190                                                        | 1044.5117                  | 1044.5451    | -31.96    | 491        | - 499 1 --- K.DLENEIKGK.G                   |
| 1069.4803                                                        | 1068.4730                  | 1068.5134    | -37.83    | 914        | - 922 0 --- R.SMQHSPNLR.T                   |
| 1179.5543                                                        | 1178.5470                  | 1178.4575    | 76.0      | 18         | - 27 0 --- K.TGEEENEEDK.V                   |
| 1269.6084                                                        | 1268.6011                  | 1268.6612    | -47.36    | 659        | - 670 0 --- K.QATAISDPPELK.R                |
| 1287.6068                                                        | 1286.5995                  | 1286.5812    | 14.2      | 479        | - 489 1 --- K.ASEMASQKEYK.K + Oxidation (M) |



1287.6068 1286.5995 1286.5812 14.2 479 - 489 1 --- K.ASEMASQKEYK.K + Oxidation (M)  
1305.5947 1304.5874 1304.6296 -32.30 788 - 798 0 --- K.GVHPHIVEMDR.R + Oxidation (M)  
1425.6982 1424.6909 1424.7623 -50.11 659 - 671 1 --- K.QATAISDPPELKR.V  
1664.7775 1663.7702 1663.8199 -29.88 461 - 475 1 --- R.GKGMQVSTDTLTDIQR.A + Oxidation (M)  
1691.7629 1690.7556 1690.8204 -38.34 500 - 514 1 --- K.GMQVSMIDIPMLRAK.R  
1702.7892 1701.7819 1701.8719 -52.89 389 - 403 1 --- K.GMELNSEVLDIQR.AK.R  
2682.3079 2681.3006 2681.3231 -8.40 200 - 224 1 --- K.GQGVNMKEPAVIGRPDPEHAVEASK.L + Oxidation (M)  
**No match to:** 834.4748, 842.4698, 848.4878, 850.0129, 850.4987, 853.4788, 862.4257, 865.9851, 868.5118, 870.5065, 876.9959, 882.5245, 882.5245, 892.9658, 951.5779, 977.4595, 977.4595, 1019.6358, 1033.6520, 1047.4978, 1047.4978, 1051.6609, 1131.6592, 1133.5562, 1149.5057, 1149.5057, 1151.6812, 1156.5675, 1165.6880, 1165.6880, 1174.5699, 1174.5699, 1182.6278, 1182.6278, 1190.5620, 1194.5756, 1212.5294, 1277.6251, 1300.7948, 1311.6462, 1311.6462, 1334.8268, 1439.7417, 1448.8599, 1475.6879, 1528.7235, 1617.9976, 1695.6990, 1732.0278, 1839.8657, 1880.9835, 1901.1722, 1904.9435, 2015.2070, 2211.0264, 2283.1013, 2683.2788, 2700.2822, 2700.2822

29. [A0A4W2CVR3](#) Mass: 479034 Score: 40 Expect: 14 Matches: 29

Dynein axonemal heavy chain 6 OS=Bos indicus x Bos taurus OX=30522 GN=DNAH6 PE=4 SV=1

| Observed                                                                                                                                                                                                                                                                                                                                                                                                                                                                                                                                   | Mr(expt)  | Mr(calc)  | ppm    | Start | End  | Miss | Ions | Peptide                                 |
|--------------------------------------------------------------------------------------------------------------------------------------------------------------------------------------------------------------------------------------------------------------------------------------------------------------------------------------------------------------------------------------------------------------------------------------------------------------------------------------------------------------------------------------------|-----------|-----------|--------|-------|------|------|------|-----------------------------------------|
| 834.4748                                                                                                                                                                                                                                                                                                                                                                                                                                                                                                                                   | 833.4675  | 833.4647  | 3.40   | 1784  | 1790 | 0    | ---  | K.TYVLNPK.S                             |
| 848.4878                                                                                                                                                                                                                                                                                                                                                                                                                                                                                                                                   | 847.4805  | 847.4334  | 55.6   | 2431  | 2436 | 1    | ---  | R.MIRQER.G + Oxidation (M)              |
| 864.5128                                                                                                                                                                                                                                                                                                                                                                                                                                                                                                                                   | 863.5055  | 863.4753  | 35.0   | 925   | 931  | 0    | ---  | K.FVTQLEK.G                             |
| 868.5118                                                                                                                                                                                                                                                                                                                                                                                                                                                                                                                                   | 867.5045  | 867.4464  | 67.1   | 649   | 654  | 1    | ---  | K.YHRQHK.D                              |
| 960.4399                                                                                                                                                                                                                                                                                                                                                                                                                                                                                                                                   | 959.4326  | 959.4672  | -36.05 | 2545  | 2553 | 0    | ---  | K.EVGISEGNNR.D                          |
| 977.4595                                                                                                                                                                                                                                                                                                                                                                                                                                                                                                                                   | 976.4522  | 976.5012  | -50.11 | 1810  | 1818 | 0    | ---  | K.DGLMALSVR.A + Oxidation (M)           |
| 977.4595                                                                                                                                                                                                                                                                                                                                                                                                                                                                                                                                   | 976.4523  | 976.5012  | -50.08 | 1810  | 1818 | 0    | ---  | K.DGLMALSVR.A + Oxidation (M)           |
| 1045.5190                                                                                                                                                                                                                                                                                                                                                                                                                                                                                                                                  | 1044.5117 | 1044.5451 | -31.97 | 4024  | 4033 | 0    | ---  | R.DQATVIEAAK.T                          |
| 1131.6592                                                                                                                                                                                                                                                                                                                                                                                                                                                                                                                                  | 1130.6519 | 1130.5608 | 80.6   | 232   | 240  | 1    | ---  | K.NDYITISK.K                            |
| 1149.5057                                                                                                                                                                                                                                                                                                                                                                                                                                                                                                                                  | 1148.4984 | 1148.4855 | 11.2   | 2320  | 2327 | 0    | ---  | R.LFCHCQR.V                             |
| 1149.5057                                                                                                                                                                                                                                                                                                                                                                                                                                                                                                                                  | 1148.4985 | 1148.4855 | 11.3   | 2320  | 2327 | 0    | ---  | R.LFCHCQR.V                             |
| 1156.5675                                                                                                                                                                                                                                                                                                                                                                                                                                                                                                                                  | 1155.5602 | 1155.5746 | -12.48 | 1551  | 1559 | 1    | ---  | R.FMFEGREIK.L                           |
| 1182.6278                                                                                                                                                                                                                                                                                                                                                                                                                                                                                                                                  | 1181.6205 | 1181.5750 | 38.5   | 1280  | 1289 | 0    | ---  | K.VEEAMFTSLR.R                          |
| 1182.6278                                                                                                                                                                                                                                                                                                                                                                                                                                                                                                                                  | 1181.6205 | 1181.5750 | 38.5   | 1280  | 1289 | 0    | 5    | K.VEEAMFTSLR.R                          |
| 1287.6068                                                                                                                                                                                                                                                                                                                                                                                                                                                                                                                                  | 1286.5995 | 1286.7207 | -94.20 | 1205  | 1215 | 1    | ---  | R.NPQAVQPHLRK.C                         |
| 1287.6068                                                                                                                                                                                                                                                                                                                                                                                                                                                                                                                                  | 1286.5995 | 1286.7207 | -94.19 | 1205  | 1215 | 1    | ---  | R.NPQAVQPHLRK.C                         |
| 1425.6982                                                                                                                                                                                                                                                                                                                                                                                                                                                                                                                                  | 1424.6909 | 1424.7088 | -12.57 | 3381  | 3391 | 0    | ---  | R.LTEAEWNFFLR.G                         |
| 1439.7417                                                                                                                                                                                                                                                                                                                                                                                                                                                                                                                                  | 1438.7344 | 1438.6472 | 60.6   | 1889  | 1900 | 0    | ---  | R.CGMVFVDPEELK.W + Oxidation (M)        |
| 1448.8599                                                                                                                                                                                                                                                                                                                                                                                                                                                                                                                                  | 1447.8526 | 1447.9238 | -49.18 | 1355  | 1368 | 1    | ---  | R.LNALAAIVRGILPK.L                      |
| 1475.6879                                                                                                                                                                                                                                                                                                                                                                                                                                                                                                                                  | 1474.6806 | 1474.7701 | -60.67 | 2903  | 2916 | 0    | ---  | R.AAQAEIDITMATLK.E                      |
| 1528.7235                                                                                                                                                                                                                                                                                                                                                                                                                                                                                                                                  | 1527.7162 | 1527.8046 | -57.81 | 1030  | 1042 | 1    | ---  | K.TTEFVVLPHRDSK.D                       |
| 1617.9976                                                                                                                                                                                                                                                                                                                                                                                                                                                                                                                                  | 1616.9903 | 1616.8596 | 80.9   | 1119  | 1132 | 1    | ---  | R.QLPAEAKMFLQVDK.S                      |
| 1664.7775                                                                                                                                                                                                                                                                                                                                                                                                                                                                                                                                  | 1663.7702 | 1663.9185 | -89.12 | 3501  | 3515 | 0    | ---  | K.VVFALTDVFVIENTLKG.A                   |
| 1691.7629                                                                                                                                                                                                                                                                                                                                                                                                                                                                                                                                  | 1690.7556 | 1690.8414 | -50.71 | 907   | 921  | 0    | ---  | K.FDSLDPPELLNSQVSK.Y                    |
| 1880.9835                                                                                                                                                                                                                                                                                                                                                                                                                                                                                                                                  | 1879.9762 | 1879.9138 | 33.2   | 4139  | 4154 | 1    | ---  | K.DYWIAGKSALLCOLNE.-                    |
| 1901.1722                                                                                                                                                                                                                                                                                                                                                                                                                                                                                                                                  | 1900.1649 | 1900.0319 | 70.0   | 2415  | 2430 | 1    | ---  | K.LVFFQDAIEHVSRIAR.M                    |
| 2211.0264                                                                                                                                                                                                                                                                                                                                                                                                                                                                                                                                  | 2210.0191 | 2210.0677 | -22.00 | 1271  | 1289 | 1    | ---  | R.GNVEEWLKGVEEAMFTSLR.R + Oxidation (M) |
| 2682.3079                                                                                                                                                                                                                                                                                                                                                                                                                                                                                                                                  | 2681.3006 | 2681.3871 | -32.27 | 3192  | 3214 | 1    | ---  | K.SGLEDDLQSDVVRLEKPELEEQR.I             |
| 2683.2788                                                                                                                                                                                                                                                                                                                                                                                                                                                                                                                                  | 2682.2715 | 2682.3725 | -37.66 | 3046  | 3069 | 1    | ---  | R.QWNTDGLPRDLISTENGILVTQGR.R            |
| <b>No match to:</b> 842.4698, 850.0129, 850.4987, 853.4788, 862.4257, 865.9851, 870.5065, 876.9959, 882.5245, 882.5245, 892.9658, 951.5779, 966.5483, 1017.6229, 1017.6229, 1019.6358, 1033.6520, 1047.4978, 1047.4978, 1051.6609, 1069.4803, 1133.5562, 1151.6812, 1165.6880, 1165.6880, 1174.5699, 1174.5700, 1179.5543, 1190.5620, 1194.5756, 1212.5294, 1269.6084, 1277.6251, 1300.7948, 1305.5947, 1311.6462, 1311.6462, 1334.8268, 1695.6990, 1702.7892, 1732.0278, 1839.8657, 1904.9435, 2015.2070, 2283.1013, 2700.2822, 2700.2822 |           |           |        |       |      |      |      |                                         |

30. [A0A4W2I420](#) Mass: 167724 Score: 40 Expect: 14 Matches: 21

Lysine demethylase 2B OS=Bos indicus x Bos taurus OX=30522 GN=KDM2B PE=4 SV=1

| Observed                                                                                                                                                                                                                                                                                                                                                                                                                                                                                                                                                                                                                        | Mr(expt)  | Mr(calc)  | ppm    | Start | End  | Miss | Ions | Peptide                              |
|---------------------------------------------------------------------------------------------------------------------------------------------------------------------------------------------------------------------------------------------------------------------------------------------------------------------------------------------------------------------------------------------------------------------------------------------------------------------------------------------------------------------------------------------------------------------------------------------------------------------------------|-----------|-----------|--------|-------|------|------|------|--------------------------------------|
| 842.4698                                                                                                                                                                                                                                                                                                                                                                                                                                                                                                                                                                                                                        | 841.4625  | 841.4698  | -8.61  | 18    | 24   | 0    | ---  | R.LPVEWAK.L                          |
| 868.5118                                                                                                                                                                                                                                                                                                                                                                                                                                                                                                                                                                                                                        | 867.5045  | 867.4199  | 97.6   | 896   | 902  | 1    | ---  | R.RSDEHPK.K                          |
| 977.4595                                                                                                                                                                                                                                                                                                                                                                                                                                                                                                                                                                                                                        | 976.4522  | 976.3920  | 61.7   | 887   | 894  | 0    | ---  | R.SCEEAAPR.R                         |
| 977.4595                                                                                                                                                                                                                                                                                                                                                                                                                                                                                                                                                                                                                        | 976.4523  | 976.3920  | 61.7   | 887   | 894  | 0    | 9    | R.SCEEAAPR.R                         |
| 1047.4978                                                                                                                                                                                                                                                                                                                                                                                                                                                                                                                                                                                                                       | 1046.4905 | 1046.5066 | -15.38 | 471   | 479  | 0    | ---  | R.ESMLIDAPR.K + Oxidation (M)        |
| 1047.4978                                                                                                                                                                                                                                                                                                                                                                                                                                                                                                                                                                                                                       | 1046.4905 | 1046.5066 | -15.38 | 471   | 479  | 0    | 0    | R.ESMLIDAPR.K + Oxidation (M)        |
| 1069.4803                                                                                                                                                                                                                                                                                                                                                                                                                                                                                                                                                                                                                       | 1068.4730 | 1068.4878 | -13.85 | 730   | 737  | 1    | ---  | R.MKQSCIMR.Q + Oxidation (M)         |
| 1133.5562                                                                                                                                                                                                                                                                                                                                                                                                                                                                                                                                                                                                                       | 1132.5489 | 1132.4931 | 49.3   | 887   | 895  | 1    | ---  | R.SCEEAAPR.R                         |
| 1156.5675                                                                                                                                                                                                                                                                                                                                                                                                                                                                                                                                                                                                                       | 1155.5602 | 1155.5196 | 35.1   | 243   | 251  | 0    | ---  | R.YYETPEAQR.D                        |
| 1165.6880                                                                                                                                                                                                                                                                                                                                                                                                                                                                                                                                                                                                                       | 1164.6807 | 1164.6437 | 31.7   | 109   | 118  | 0    | ---  | R.RPPVPPIMSR.A + Oxidation (M)       |
| 1165.6880                                                                                                                                                                                                                                                                                                                                                                                                                                                                                                                                                                                                                       | 1164.6807 | 1164.6437 | 31.8   | 109   | 118  | 0    | ---  | R.RPPVPPIMSR.A + Oxidation (M)       |
| 1194.5756                                                                                                                                                                                                                                                                                                                                                                                                                                                                                                                                                                                                                       | 1193.5683 | 1193.6040 | -29.91 | 425   | 433  | 1    | ---  | R.IYEIEDRTR.V                        |
| 1277.6251                                                                                                                                                                                                                                                                                                                                                                                                                                                                                                                                                                                                                       | 1276.6178 | 1276.6333 | -12.14 | 221   | 231  | 0    | ---  | R.LVDVMDVNTQK.G + Oxidation (M)      |
| 1287.6068                                                                                                                                                                                                                                                                                                                                                                                                                                                                                                                                                                                                                       | 1286.5995 | 1286.6871 | -68.03 | 1296  | 1306 | 0    | ---  | R.TLDVQWVEGLK.D                      |
| 1287.6068                                                                                                                                                                                                                                                                                                                                                                                                                                                                                                                                                                                                                       | 1286.5995 | 1286.6871 | -68.02 | 1296  | 1306 | 0    | ---  | R.TLDVQWVEGLK.D                      |
| 1300.7948                                                                                                                                                                                                                                                                                                                                                                                                                                                                                                                                                                                                                       | 1299.7875 | 1299.7584 | 22.4   | 1231  | 1242 | 0    | ---  | K.SITPLMLSGIIR.R                     |
| 1311.6462                                                                                                                                                                                                                                                                                                                                                                                                                                                                                                                                                                                                                       | 1310.6389 | 1310.7129 | -56.44 | 83    | 95   | 1    | ---  | K.VAPVPKVGCTGAR.G                    |
| 1311.6462                                                                                                                                                                                                                                                                                                                                                                                                                                                                                                                                                                                                                       | 1310.6390 | 1310.7129 | -56.41 | 83    | 95   | 1    | ---  | K.VAPVPKVGCTGAR.G                    |
| 1334.8268                                                                                                                                                                                                                                                                                                                                                                                                                                                                                                                                                                                                                       | 1333.8195 | 1333.6990 | 90.4   | 925   | 935  | 1    | ---  | K.YEKPQELSGRK.R                      |
| 1702.7892                                                                                                                                                                                                                                                                                                                                                                                                                                                                                                                                                                                                                       | 1701.7819 | 1701.8111 | -17.11 | 175   | 187  | 1    | ---  | K.DFNYYVQREALR.V                     |
| 1904.9435                                                                                                                                                                                                                                                                                                                                                                                                                                                                                                                                                                                                                       | 1903.9362 | 1903.9462 | -5.24  | 1296  | 1311 | 1    | ---  | R.TLDVQWVEGLKDAQMR.D + Oxidation (M) |
| <b>No match to:</b> 834.4748, 848.4878, 850.0129, 850.4987, 853.4788, 862.4257, 864.5128, 865.9851, 870.5065, 876.9959, 882.5245, 882.5245, 892.9658, 951.5779, 960.4399, 966.5483, 1017.6229, 1017.6229, 1019.6358, 1033.6520, 1045.5190, 1051.6609, 1131.6592, 1149.5057, 1149.5057, 1151.6812, 1174.5699, 1174.5700, 1179.5543, 1182.6278, 1182.6278, 1190.5620, 1212.5294, 1269.6084, 1305.5947, 1425.6982, 1439.7417, 1448.8599, 1475.6879, 1528.7235, 1617.9976, 1664.7775, 1691.7629, 1695.6990, 1732.0278, 1839.8657, 1880.9835, 1901.1722, 2015.2070, 2211.0264, 2283.1013, 2682.3079, 2683.2788, 2700.2822, 2700.2822 |           |           |        |       |      |      |      |                                      |

## Search Parameters

Type of search : Sequence Query  
Enzyme : Trypsin  
Fixed modifications : [Carbamidomethyl \(C\)](#)  
Variable modifications : [Oxidation \(M\)](#)  
Mass values : Monoisotopic  
Protein Mass : Unrestricted  
Peptide Mass Tolerance :  $\pm 100$  ppm  
Fragment Mass Tolerance :  $\pm 0.3$  Da  
Max Missed Cleavages : 1  
Instrument type : MALDI-TOF-TOF

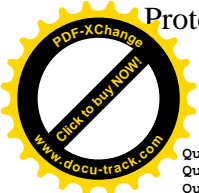

Query1 (834.4748,1+): <no title>  
Query2 (842.4698,1+): <no title>  
Query3 (848.4878,1+): <no title>  
Query4 (850.0129,1+): <no title>  
Query5 (850.4987,1+): <no title>  
Query6 (853.4788,1+): <no title>  
Query7 (862.4257,1+): <no title>  
Query8 (864.5128,1+): <no title>  
Query9 (865.9851,1+): <no title>  
Query10 (868.5118,1+): <no title>  
Query11 (870.5065,1+): <no title>  
Query12 (876.9959,1+): <no title>  
Query13 (882.5245,1+): <no title>  
Query14 (882.5245,1+): Locus:1..14.0.7  
Query15 (892.9658,1+): <no title>  
Query16 (951.5779,1+): <no title>  
Query17 (960.4399,1+): <no title>  
Query18 (977.4595,1+): <no title>  
Query19 (977.4595,1+): Locus:1..14.0.5  
Query20 (996.5483,1+): <no title>  
Query21 (1017.6229,1+): <no title>  
Query22 (1017.6229,1+): Locus:1..14.0.11  
Query23 (1019.6358,1+): <no title>  
Query24 (1033.6520,1+): <no title>  
Query25 (1045.5190,1+): <no title>  
Query26 (1047.4978,1+): <no title>  
Query27 (1047.4978,1+): Locus:1..14.0.1  
Query28 (1051.6609,1+): <no title>  
Query29 (1069.4803,1+): <no title>  
Query30 (1131.6592,1+): <no title>  
Query31 (1133.5562,1+): <no title>  
Query32 (1149.5057,1+): <no title>  
Query33 (1149.5057,1+): Locus:1..14.0.9  
Query34 (1151.6812,1+): <no title>  
Query35 (1156.5675,1+): <no title>  
Query36 (1165.6880,1+): Locus:1..14.0.10  
Query37 (1165.6880,1+): <no title>  
Query38 (1174.5699,1+): <no title>  
Query39 (1174.5700,1+): Locus:1..14.0.2  
Query40 (1179.5543,1+): <no title>  
Query41 (1182.6278,1+): <no title>  
Query42 (1182.6278,1+): Locus:1..14.0.8  
Query43 (1190.5620,1+): <no title>  
Query44 (1194.5756,1+): <no title>  
Query45 (1212.5294,1+): <no title>  
Query46 (1269.6084,1+): <no title>  
Query47 (1277.6251,1+): <no title>  
Query48 (1287.6068,1+): <no title>  
Query49 (1287.6068,1+): Locus:1..14.0.4  
Query50 (1300.7948,1+): <no title>  
Query51 (1305.5947,1+): <no title>  
Query52 (1311.6462,1+): <no title>  
Query53 (1311.6462,1+): Locus:1..14.0.3  
Query54 (1334.8268,1+): <no title>  
Query55 (1425.6982,1+): <no title>  
Query56 (1439.7417,1+): <no title>  
Query57 (1448.8599,1+): <no title>  
Query58 (1475.6879,1+): <no title>  
Query59 (1528.7235,1+): <no title>  
Query60 (1617.9976,1+): <no title>  
Query61 (1664.7775,1+): <no title>  
Query62 (1691.7629,1+): <no title>  
Query63 (1695.6990,1+): <no title>  
Query64 (1702.7892,1+): <no title>  
Query65 (1732.0278,1+): <no title>  
Query66 (1839.8657,1+): <no title>  
Query67 (1880.9835,1+): <no title>  
Query68 (1901.1722,1+): <no title>  
Query69 (1904.9435,1+): <no title>  
Query70 (2015.2070,1+): <no title>  
Query71 (2211.0264,1+): <no title>  
Query72 (2283.1013,1+): <no title>  
Query73 (2682.3079,1+): <no title>  
Query74 (2683.2788,1+): <no title>  
Query75 (2700.2822,1+): <no title>  
Query76 (2700.2822,1+): Locus:1..14.0.6

Mascot: <http://www.matrixscience.com/>
