# Supplementary material for: Alpha-2-Macroglobulin as a New Promising Biomarker Improving the Diagnostic Sensitivity of Bovine Paratuberculosis
Source: Frontiers journal article supplement (doi:10.3389/fvets.2021.637716), 2021-03-05
Supplement: Data_Sheet_1.zip [file Data_Sheet_1.zip]

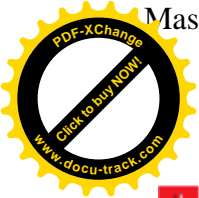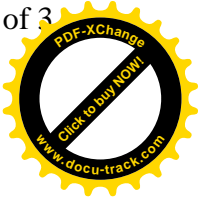

# MATRIX SCIENCE MASCOT Search Results

## Protein View: A0A3Q1MU98

Complement component C9 OS=Bos taurus OX=9913 GN=C9 PE=1 SV=1

Database: Uniprot\_bovine  
Score: 131  
Expect: 1.1e-008  
Nominal mass (M<sub>r</sub>): 58618  
Calculated pI: 5.74

Sequence similarity is available as [an NCBI BLAST search of A0A3Q1MU98 against nr.](#)

### Search parameters

Enzyme: Trypsin: cuts C-term side of KR unless next residue is P.  
Fixed modifications: [Carbamidomethyl \(C\)](#)  
Variable modifications: [Oxidation \(M\)](#)

Protein sequence coverage: 16%

Matched peptides shown in **bold red**.

1 MSAGQRFafa ICILEISLLR AGPTPSYDPA ER**QGTPLPID** CRMSSWSEWS  
51 KCDPCLKQMF RSR**SIEIFGQ** FNGRKCVDAV GDRQQCVPT E ACEDPEEGCG  
101 NDFQCGTGRC IKNRLLCNED NDCGDYSD E NCEQDPRPPC RNRVVEESEL  
151 ARTAGFGINI LGMDPLSTPF DNQYYNGLCD **RVWDGNTLT**Y **YRRPWNVASL**  
201 **FYDTK**ADKNF RTENHEESIQ ILRTIIEKK LNFNAGLSVK YTPVEAIEKN  
251 KCVLDLEHSDK GSTSSPSKLA AEAKFRFTYS KDDIYR**LLSS** **YSAKQEKMF**L  
301 **HVK**GKVHLGR FVMRSRDVML QTTFLDSINT LPTTYEKGEY FAFLETYGT H  
351 YSSSGSLGGL YELIYVLDK SMEQKETNPE ADLFDDVITF IRGGTRKYAT  
401 ELKEKLLRGA RMINVTDFVN WAASLNHAPV LISQKLVP IY DLIPVK**MKDA**  
451 **HLKKQ**NLERA **IEDYINEFSV** RKCQPCQNGG TVVLLDGECV CSCPKEFKGV  
501 ACEIKK

Unformatted sequence string: [506 residues](#) (for pasting into other applications).

Sort peptides by ☒ Residue Number ☐ Increasing Mass ☐ Decreasing Mass

Show predicted peptides also

| Query              | Start - End | Observed  | Mr(expt)  | Mr(calc)  | ppm   | M | Score | Peptide                                  |
|--------------------|-------------|-----------|-----------|-----------|-------|---|-------|------------------------------------------|
| <a href="#">36</a> | 33 - 42     | 1156.5005 | 1155.4932 | 1155.5706 | -67.0 | 0 |       | <b>R.QGTPLPIDCR.M</b>                    |
| <a href="#">43</a> | 64 - 74     | 1267.5582 | 1266.5509 | 1266.6357 | -66.9 | 0 |       | <b>R.SIEIFGQFNGR.K</b>                   |
| <a href="#">44</a> | 64 - 74     | 1267.5582 | 1266.5510 | 1266.6357 | -66.9 | 0 | 29    | <b>R.SIEIFGQFNGR.K</b>                   |
| <a href="#">52</a> | 182 - 192   | 1387.5682 | 1386.5609 | 1386.6568 | -69.2 | 0 |       | <b>R.VWDGNTLTYYR.R</b>                   |
| <a href="#">53</a> | 182 - 192   | 1387.5682 | 1386.5610 | 1386.6568 | -69.1 | 0 | 18    | <b>R.VWDGNTLTYYR.R</b>                   |
| <a href="#">65</a> | 193 - 205   | 1550.6960 | 1549.6887 | 1549.7889 | -64.6 | 0 |       | <b>R.RPWNVASLTYDTK.A</b>                 |
| <a href="#">66</a> | 193 - 205   | 1550.6960 | 1549.6888 | 1549.7889 | -64.6 | 0 |       | <b>R.RPWNVASLTYDTK.A</b>                 |
| <a href="#">9</a>  | 287 - 294   | 868.4844  | 867.4771  | 867.4702  | 8.03  | 0 |       | <b>R.LLSSYSAK.Q</b>                      |
| <a href="#">39</a> | 295 - 303   | 1175.5602 | 1174.5529 | 1174.6169 | -54.4 | 1 |       | <b>K.QEKMF</b> LHVK.G +<br>Oxidation (M) |
| <a href="#">2</a>  | 447 - 453   | 842.4471  | 841.4398  | 841.4480  | -9.70 | 1 |       | <b>K.MKDAHLK.K</b>                       |
| <a href="#">57</a> | 460 - 471   | 1455.6167 | 1454.6094 | 1454.7041 | -65.1 | 0 |       | <b>R.AIEDYINEFSVR.K</b>                  |
| <a href="#">58</a> | 460 - 471   | 1455.6167 | 1454.6094 | 1454.7041 | -65.1 | 0 | 57    | <b>R.AIEDYINEFSVR.K</b>                  |

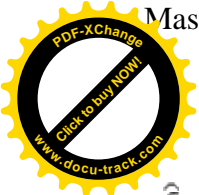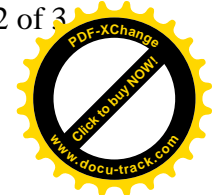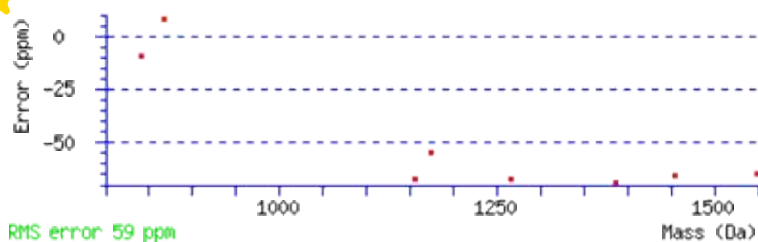

ID A0A3Q1MU98\_BOVIN Unreviewed; 506 AA.  
AC A0A3Q1MU98;  
DT 10-APR-2019, integrated into UniProtKB/TrEMBL.  
DT 10-APR-2019, sequence version 1.  
DT 07-OCT-2020, entry version 9.  
DE RecName: Full=Complement component C9 {ECO:0000256|ARBA:ARBA00018261};  
GN Name=C9 {ECO:0000313|Ensembl:ENSBTAP00000074107,  
GN ECO:0000313|VGNC:VGNC:26647};  
OS Bos taurus (Bovine).  
OC Eukaryota; Metazoa; Chordata; Craniata; Vertebrata; Euteleostomi; Mammalia;  
OC Eutheria; Laurasiatheria; Artiodactyla; Ruminantia; Pecora; Bovidae;  
OC Bovinae; Bos.  
OX NCBI\_TaxID=9913 {ECO:0000313|Ensembl:ENSBTAP00000074107, ECO:0000313|Proteomes:UP000009:  
RN [1] {ECO:0000313|Ensembl:ENSBTAP00000074107, ECO:0000313|Proteomes:UP000009136}  
RP NUCLEOTIDE SEQUENCE [LARGE SCALE GENOMIC DNA].  
RC STRAIN=Hereford {ECO:0000313|Ensembl:ENSBTAP00000074107,  
RC ECO:0000313|Proteomes:UP000009136};  
RA Rosen B.D., Bickhart D.M., Koren S., Schnabel R.D., Hall R., Zimin A.,  
RA Dreischer C., Schultheiss S., Schroeder S.G., Elvik C.G., Couldrey C.,  
RA Liu G.E., Van Tassell C.P., Phillippy A.M., Smith T.P.L., Medrano J.F.;  
RT "ARS-UCD1.2.";  
RL Submitted (MAR-2018) to the EMBL/GenBank/DDBJ databases.  
RN [2] {ECO:0000313|Ensembl:ENSBTAP00000074107}  
RP IDENTIFICATION.  
RC STRAIN=Hereford {ECO:0000313|Ensembl:ENSBTAP00000074107};  
RG Ensembl;  
RL Submitted (JAN-2019) to UniProtKB.  
CC -!- SUBCELLULAR LOCATION: Cell membrane {ECO:0000256|ARBA:ARBA00004651};  
CC Multi-pass membrane protein {ECO:0000256|ARBA:ARBA00004651}. Membrane  
CC {ECO:0000256|ARBA:ARBA00004141}; Multi-pass membrane protein  
CC {ECO:0000256|ARBA:ARBA00004141}. Secreted  
CC {ECO:0000256|ARBA:ARBA00004613}. Target cell membrane  
CC {ECO:0000256|ARBA:ARBA00004276}; Multi-pass membrane protein  
CC {ECO:0000256|ARBA:ARBA00004276}.  
CC -!- SIMILARITY: Belongs to the complement C6/C7/C8/C9 family.  
CC {ECO:0000256|ARBA:ARBA00009214}.  
CC -!- CAUTION: Lacks conserved residue(s) required for the propagation of  
CC feature annotation. {ECO:0000256|PROSITE-ProRule:PRU00124}.  
CC -----  
CC Copyrighted by the UniProt Consortium, see <https://www.uniprot.org/terms>  
CC Distributed under the Creative Commons Attribution (CC BY 4.0) License  
CC -----  
DR Ensembl; ENSBTAT00000083951; ENSBTAP00000074107; ENSBTAG00000016149.  
DR VGNC; VGNC:26647; C9.  
DR GeneTree; ENSGT00940000159777; -.  
DR Proteomes; UP000009136; Chromosome 20.  
DR ExpressionAtlas; A0A3Q1MU98; baseline.  
DR GO; GO:0005576; C:extracellular region; IEA:UniProtKB-SubCell.  
DR GO; GO:0005579; C:membrane attack complex; IEA:UniProtKB-KW.  
DR GO; GO:0044218; C:other organism cell membrane; IEA:UniProtKB-SubCell.  
DR GO; GO:0006957; P:complement activation, alternative pathway; IEA:UniProtKB-KW.  
DR GO; GO:0006958; P:complement activation, classical pathway; IEA:UniProtKB-KW.  
DR GO; GO:0019835; P:cytolysis; IEA:UniProtKB-KW.  
DR CDD; cd00112; LDLa; 1.  
DR Gene3D; 2.20.100.10; -; 1.  
DR Gene3D; 4.10.400.10; -; 1.  
DR InterPro; IPR037567; Complement\_C9.  
DR InterPro; IPR000742; EGF-like\_dom.  
DR InterPro; IPR009030; Growth\_fac\_rcpt\_cys\_sf.  
DR InterPro; IPR036055; LDL\_receptor-like\_sf.  
DR InterPro; IPR023415; LDLR\_class-A\_CS.  
DR InterPro; IPR002172; LDrepeatLR\_classA\_rpt.  
DR InterPro; IPR001862; MAC\_perforin.

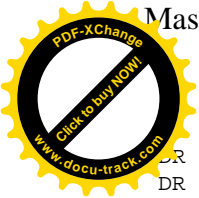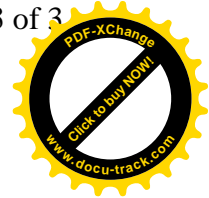

DR InterPro; IPR020864; MACPF.  
DR InterPro; IPR020863; MACPF\_CS.  
DR InterPro; IPR000884; TSP1\_rpt.  
DR InterPro; IPR036383; TSP1\_rpt\_sf.  
DR PANTHER; PTHR45742:SF3; PTHR45742:SF3; 2.  
DR Pfam; PF00057; Ldl\_recept\_a; 1.  
DR Pfam; PF01823; MACPF; 1.  
DR PRINTS; PR00764; COMPLEMENTC9.  
DR SMART; SM00192; LDLa; 1.  
DR SMART; SM00457; MACPF; 1.  
DR SMART; SM00209; TSP1; 1.  
DR SUPFAM; SSF57184; SSF57184; 1.  
DR PROSITE; PS00022; EGF\_1; 1.  
DR PROSITE; PS01209; LDLRA\_1; 1.  
DR PROSITE; PS50068; LDLRA\_2; 1.  
DR PROSITE; PS00279; MACPF\_1; 1.  
DR PROSITE; PS51412; MACPF\_2; 1.  
DR PROSITE; PS50092; TSP1; 1.  
PE 1: Evidence at protein level;  
KW Coiled coil {ECO:0000256|SAM:Coils};  
KW Complement alternate pathway {ECO:0000256|ARBA:ARBA00023162};  
KW Complement pathway {ECO:0000256|ARBA:ARBA00023058};  
KW Cytolysis {ECO:0000256|ARBA:ARBA00023058};  
KW Disulfide bond {ECO:0000256|ARBA:ARBA00023157, ECO:0000256|PROSITE-  
KW ProRule:PRU00124}; Glycoprotein {ECO:0000256|ARBA:ARBA00023180};  
KW Immunity {ECO:0000256|ARBA:ARBA00023058, ECO:0000256|ARBA:ARBA00023162};  
KW Innate immunity {ECO:0000256|ARBA:ARBA00023058,  
KW ECO:0000256|ARBA:ARBA00023162};  
KW Membrane {ECO:0000256|ARBA:ARBA00022452, ECO:0000256|ARBA:ARBA00022537};  
KW Membrane attack complex {ECO:0000256|ARBA:ARBA00023058};  
KW Proteomics identification {ECO:0000213|PeptideAtlas:A0A3Q1MU98};  
KW Reference proteome {ECO:0000313|Proteomes:UP000009136};  
KW Secreted {ECO:0000256|ARBA:ARBA00022525}; Signal {ECO:0000256|SAM:SignalP};  
KW Target cell membrane {ECO:0000256|ARBA:ARBA00022537};  
KW Target membrane {ECO:0000256|ARBA:ARBA00022537};  
KW Transmembrane {ECO:0000256|ARBA:ARBA00022452};  
KW Transmembrane beta strand {ECO:0000256|ARBA:ARBA00022452}.  
FT SIGNAL 1..21  
FT /evidence="ECO:0000256|SAM:SignalP"  
FT CHAIN 22..506  
FT /note="Complement component C9"  
FT /evidence="ECO:0000256|SAM:SignalP"  
FT /id="PRO\_5018711762"  
FT DOMAIN 136..472  
FT /note="MACPF"  
FT /evidence="ECO:0000259|PROSITE:PS51412"  
FT COILED 447..467  
FT /evidence="ECO:0000256|SAM:Coils"  
FT DISULFID 105..123  
FT /evidence="ECO:0000256|PROSITE-ProRule:PRU00124"  
FT DISULFID 117..132  
FT /evidence="ECO:0000256|PROSITE-ProRule:PRU00124"  
SQ SEQUENCE 506 AA; 57400 MW; 96AF4A8F30D3EB39 CRC64;  
MSAGQRFafa ICILEISLLR AGPTPSYDPA ERQGTPLPID CRMSSWSEWS KCDPCLKQMF  
RSRSIEIFGQ FNGRKCVDAV GDRQQCVPT E ACEDPEEGCG NDFQCGTGRC IKNRLLCNED  
NDCGDYSDDED NCEQDPRPPC RNRVVEESEL ARTAGFGINI LGMDPLSTPF DNQYYNGLCD  
RVWDGNTLT YRRPWNVASL TYDTKADKNF RTENHEESIQ ILRTIIEKK LNFNAGLSVK  
YTPVEAIEKN KCVDLHSDK GSTSSPSKLA AEAKFRFTYS KDDIYRLLS YSAQEKMF  
HVKGKVHLGR FVMRSRDVML QTTFLD SINT LPTTYEKGEY FAFLETYGT YSSSGSLGGL  
YELIYVLDKK SMEQKETNPE ADLFDDVITF IRGGTRKYAT ELKEKLLRGA RMINVTDFVN  
WAASLNHAPV LISQKLVPIY DLIPVKMKDA HLKKQNLERA IEDYINEFSV RKCQPCQNGG  
TVVLLDGECV CSCPKEFKGV ACEIKK

//

Mascot: <http://www.matrixscience.com/>
