# Supplementary material for: Alpha-2-Macroglobulin as a New Promising Biomarker Improving the Diagnostic Sensitivity of Bovine Paratuberculosis
Source: Frontiers journal article supplement (doi:10.3389/fvets.2021.637716), 2021-03-05
Supplement: Data_Sheet_1.zip [file Data_Sheet_1.zip]

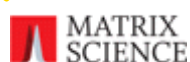

## MASCOT Search Results

## Protein View: A0A4W2D411

Complement C3 OS=Bos indicus x Bos taurus OX=30522 GN=C3 PE=4  
SV=1

Database: Uniprot\_bovine  
Score: 86  
Expect: 0.00032  
Nominal mass ( $M_r$ ): 190190  
Calculated pI: 8.36

Sequence similarity is available as [an NCBI BLAST search of A0A4W2D411 against nr.](#)

## Search parameters

Enzyme: Trypsin: cuts C-term side of KR unless next residue is P.  
Fixed modifications: [Carbamidomethyl \(C\)](#)  
Variable modifications: [Oxidation \(M\)](#)

Protein sequence coverage: 9%

Matched peptides shown in **bold red**.

|      |                    |                           |                    |                   |                    |
|------|--------------------|---------------------------|--------------------|-------------------|--------------------|
| 1    | MGCEAPPLPP         | PPPPRPQLSA                | GLRIPCETRD         | WGRALTLGKG        | WQPGLPGMTA         |
| 51   | PRPMLPSGRY         | SMITPNILRL                | ESEETVVLEA         | HGGQGTIQVS        | VTVHDFPAKK         |
| 101  | QVLSNENTQL         | NSNNGYLSTV                | TIKIPASKEL         | KSDKGHKFVT        | VVATFGNVQV         |
| 151  | EKVVLISLQS         | GYLFIQTDKT                | IYTPGSTVLY         | RVFTVDHKLL        | PVGQTVFITI         |
| 201  | ETPDGIPVKR         | DSKSSQNQFG                | ILTLSWNIPE         | LVNMGVWKIK        | AYYEDSPQQV         |
| 251  | FSAEFEVKEY         | VLPSFEVQLE                | PEEKFYIIDD         | PDGLKVNIIA        | RFLYGEQVDG         |
| 301  | TAFVIFGVQD         | GDRRISLTHS                | LTRVPINDGN         | GEAILKRQVL        | LNGVQPSRAD         |
| 351  | ALVGKSIYVS         | ATVILQSGSD                | MVEAERTGIP         | IVTSPYQIHF        | TKTPKFFKPA         |
| 401  | MPFDLMVYVT         | NPDGSPARHI                | PVVTQGSNVQ         | SLTQDDGVAK        | LSINTQNKRD         |
| 451  | PLTITVTRTK         | DNIPEGRQAT                | RTMQALPYNT         | QGNSNNYLHL        | SVPRVELKPG         |
| 501  | ETLNVNFHLR         | TDPGEQAKIR                | <b>YYTYMIMNKG</b>  | <b>KLLKVGRQYR</b> | EPGQDLVVLP         |
| 551  | LTITSDFIPS         | FRLVAYYTLI                | NAKGQREVVA         | DSVWVDVKDS        | CMGTLVVKNG         |
| 601  | GKEEKHHRPG         | QQITLKIAD                 | QGARVGLVAV         | DKGVFVLNKK        | NKLTQRKIWD         |
| 651  | <b>VVEKADIGCT</b>  | <b>PGSGR</b> NYAGV        | FTDAGLTLKT         | SQGLETTQRA        | DPQCPQPATR         |
| 701  | RRR <b>SVQLMEK</b> | RMDK <b>AGQYSS</b>        | <b>DLR</b> KCCEDGM | RDNPMKFPCQ        | RR <b>AQFILQGD</b> |
| 751  | <b>ACVK</b> AFLDCC | EYITQLRQQH                | SRDGALELAR         | SDLDDDIPE         | EDIISR <b>SQFP</b> |
| 801  | <b>ESWLWTVIED</b>  | <b>LK</b> QADKNGIS        | TKLMNVFLKD         | SITTWEILAV        | SLSDKK <b>GICV</b> |
| 851  | <b>ADPYEVTVMQ</b>  | <b>DF</b> FIDLRLPY        | <b>SVVRNEQVEI</b>  | <b>RAILYNYREA</b> | ENLK <b>VRVELL</b> |
| 901  | <b>YNPAFCSLAT</b>  | <b>AKKR</b> <b>HQQTIT</b> | <b>IPARSSVAVP</b>  | YVIVPLKIGL        | HEVEVK <b>AAVY</b> |
| 951  | <b>NHFISDGVKK</b>  | TLKVVPPEGVR               | VNKTVAVRTL         | NPEHLGQGGV        | QREEVPAADL         |
| 1001 | SDQVPDTESE         | TKILLQGTPV                | AQMTEDAIDG         | ERLKHLIQTP        | SGCGEQNMIG         |
| 1051 | MTPTVIAVHY         | LDSTDQWEKF                | GLEKRQESLE         | LIRKGYTQQ         | AFRQKSSAYA         |
| 1101 | AFQYRPPSTW         | LTAYVVKVFA                | LAANLIAIDS         | KDLCETVKWL        | ILEKQKPDGI         |

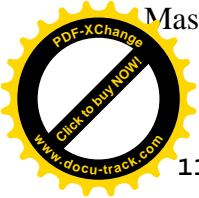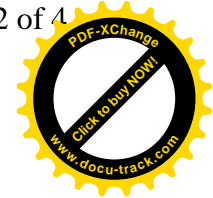

1151 FQEDGPVIHQ EMIGGFRDTR EKDVSLTAFV LIALHEAKDI CEAQVNSLGR  
1201 SIAKAGDFLE NHYRELRRPY TVAIAAYALA LLGKLEGDRL TKFLNTAKEK  
1251 NRWEEPQKL YNVEATSYAL LALLARKDYD TTPPVVRWLN EQRYGGGYG  
1301 STQATFMVFQ ALAQYQKDVP DHKELNLDVS IQLPSRNSAV RHRILWESAS  
1351 LLRSEETKEN ERFTVKAEGK GQGTLNVVTV YHAKLKGKVS CKKFDLRVSI  
1401 RPAPETVKKP QDAKGSMILD ICTKYLGDQD ATMSILDISM MTGFSPDVED  
1451 LK**TLSTGVDR** YISKYEMNRD SNKNTLIIYL DKVSHTVEDC LSKFVHQYFN  
1501 VGLIQPGAVK VYSYNNLDET CIRFYHPDKE DGMLSKLCHK DTCRCAEENC  
1551 FMHHTKEKVT LEDRLDKACE PGVDYVYKTR LIQKKLEDDF DEYIMVIENI  
1601 IKSGSATSSG RTPGWSCGPR LKNVKMRRTS NSARTWPTSQ RTWSSLAAPT  
1651 DPTIHPLIH TVHAIKLHFC STCLLKSGGL

Unformatted sequence string: 1680 residues (for pasting into other applications).

Sort peptides by      Residue Number      Increasing Mass      Decreasing Mass

Show predicted peptides also

| Query                                         | Start - End | Observed  | Mr(expt)  | Mr(calc)  | ppm   | M | Score | Peptide                       |
|-----------------------------------------------|-------------|-----------|-----------|-----------|-------|---|-------|-------------------------------|
| <input checked="" type="checkbox"/> <u>54</u> | 521 - 531   | 1427.7352 | 1426.7279 | 1426.6625 | 45.9  | 1 |       | R.YYTY<br>+<br>Oxidat:<br>(M) |
| <input checked="" type="checkbox"/> <u>32</u> | 655 - 665   | 1090.4866 | 1089.4793 | 1089.4873 | -7.34 | 0 |       | K.ADIG                        |
| <input checked="" type="checkbox"/> <u>5</u>  | 704 - 710   | 850.5049  | 849.4976  | 849.4266  | 83.6  | 0 |       | R.SVQI<br>+<br>Oxidat:<br>(M) |
| <input checked="" type="checkbox"/> <u>23</u> | 715 - 723   | 996.5558  | 995.5485  | 995.4672  | 81.7  | 0 |       | K.AGQY                        |
| <input checked="" type="checkbox"/> <u>49</u> | 743 - 754   | 1349.6270 | 1348.6197 | 1348.6809 | -45.4 | 0 |       | R.AQFI                        |
| <input checked="" type="checkbox"/> <u>71</u> | 797 - 812   | 1977.9272 | 1976.9199 | 1976.9884 | -34.6 | 0 |       | R.SQFE                        |
| <input checked="" type="checkbox"/> <u>8</u>  | 823 - 829   | 864.5046  | 863.4973  | 863.4939  | 3.99  | 0 |       | K.LMNV                        |
| <input checked="" type="checkbox"/> <u>77</u> | 847 - 867   | 2488.1152 | 2487.1079 | 2487.1814 | -29.6 | 0 |       | K.GICV                        |
| <input checked="" type="checkbox"/> <u>1</u>  | 868 - 874   | 833.4543  | 832.4470  | 832.4807  | -40.4 | 0 |       | R.LPYS                        |
| <input checked="" type="checkbox"/> <u>2</u>  | 868 - 874   | 833.4543  | 832.4471  | 832.4807  | -40.4 | 0 | 29    | R.LPYS                        |
| <input checked="" type="checkbox"/> <u>16</u> | 875 - 881   | 887.4306  | 886.4233  | 886.4508  | -31.0 | 0 |       | R.NEQV                        |
| <input checked="" type="checkbox"/> <u>18</u> | 882 - 888   | 912.4536  | 911.4463  | 911.4865  | -44.0 | 0 |       | R.AILY                        |
| <input checked="" type="checkbox"/> <u>19</u> | 882 - 888   | 912.4536  | 911.4463  | 911.4865  | -44.0 | 0 | 28    | R.AILY                        |
| <input checked="" type="checkbox"/> <u>73</u> | 895 - 912   | 2052.0193 | 2051.0120 | 2051.0874 | -36.7 | 1 |       | K.VRVE                        |
| <input checked="" type="checkbox"/> <u>68</u> | 897 - 912   | 1796.8849 | 1795.8776 | 1795.9178 | -22.4 | 0 |       | R.VELI                        |
| <input checked="" type="checkbox"/> <u>36</u> | 915 - 924   | 1164.6057 | 1163.5984 | 1163.6411 | -36.7 | 0 |       | R.HQQT                        |
| <input checked="" type="checkbox"/> <u>53</u> | 947 - 959   | 1420.6680 | 1419.6607 | 1419.7147 | -38.0 | 0 |       | K.AAVY                        |
| <input checked="" type="checkbox"/> <u>4</u>  | 1453 - 1460 | 848.4947  | 847.4874  | 847.4400  | 56.0  | 0 |       | K.TLST                        |

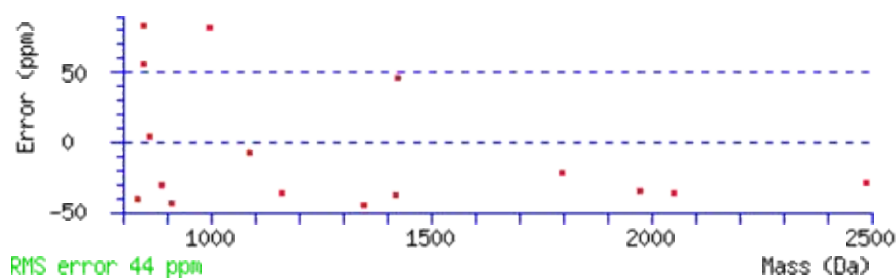

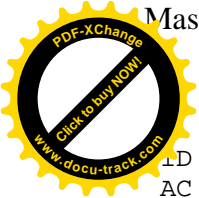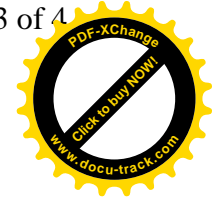

ID A0A4W2D411\_BOBOX Unreviewed; 1680 AA.  
AC A0A4W2D411;  
DT 18-SEP-2019, integrated into UniProtKB/TrEMBL.  
DT 18-SEP-2019, sequence version 1.  
DT 26-FEB-2020, entry version 5.  
DE SubName: Full=Complement C3 {ECO:0000313|Ensembl:ENSBIXP000000018941};  
GN Name=C3 {ECO:0000313|Ensembl:ENSBIXP000000018941};  
OS Bos indicus x Bos taurus (Hybrid cattle).  
OC Eukaryota; Metazoa; Chordata; Craniata; Vertebrata; Euteleostomi; Mammalia;  
OC Eutheria; Laurasiatheria; Artiodactyla; Ruminantia; Pecora; Bovidae;  
OC Bovinae; Bos.  
OX NCBI\_TaxID=30522 {ECO:0000313|Ensembl:ENSBIXP000000018941, ECO:0000313|Prote  
RN [1] {ECO:0000313|Ensembl:ENSBIXP000000018941, ECO:0000313|Proteomes:UP000314  
RP NUCLEOTIDE SEQUENCE [LARGE SCALE GENOMIC DNA].  
RA Low W.Y., Tearle R., Bickhart D.M., Rosen B.D., Koren S., Rhie A.,  
RA Hiendler S., Phillippy A.M., Smith T.P.L., Williams J.L.;  
RT "Haplotype-resolved cattle genomes."  
RL Submitted (NOV-2018) to the EMBL/GenBank/DDBJ databases.  
RN [2] {ECO:0000313|Ensembl:ENSBIXP000000018941}  
RP IDENTIFICATION.  
RG Ensembl;  
RL Submitted (JUL-2019) to UniProtKB.  
CC -----  
CC Copyrighted by the UniProt Consortium, see <https://www.uniprot.org/terms>  
CC Distributed under the Creative Commons Attribution (CC BY 4.0) License  
CC -----  
DR Ensembl; ENSBIXT00000032285; ENSBIXP000000018941; ENSBIXG000000022699.  
DR Proteomes; UP000314981; Chromosome 7.  
DR GO; GO:0005615; C:extracellular space; IEA:InterPro.  
DR GO; GO:0004866; F:endopeptidase inhibitor activity; IEA:InterPro.  
DR GO; GO:0006956; P:complement activation; IEA:InterPro.  
DR GO; GO:0006954; P:inflammatory response; IEA:InterPro.  
DR CDD; cd00017; ANATO; 1.  
DR Gene3D; 2.40.50.120; -; 1.  
DR Gene3D; 2.60.40.10; -; 2.  
DR Gene3D; 2.60.40.690; -; 1.  
DR InterPro; IPR009048; A-macroglobulin\_rcpt-bd.  
DR InterPro; IPR036595; A-macroglobulin\_rcpt-bd\_sf.  
DR InterPro; IPR011625; A2M\_N\_BRD.  
DR InterPro; IPR011626; Alpha-macroglobulin\_TED.  
DR InterPro; IPR000020; Anaphylatoxin/fibulin.  
DR InterPro; IPR018081; Anaphylatoxin\_comp\_syst.  
DR InterPro; IPR001840; Anaphylatoxin\_comp\_syst\_dom.  
DR InterPro; IPR041425; C3/4/5\_MG1.  
DR InterPro; IPR035711; Complement\_C3-like.  
DR InterPro; IPR013783; Ig-like\_fold.  
DR InterPro; IPR001599; Macroglobln\_a2.  
DR InterPro; IPR019742; MacrogloblnA2\_CS.  
DR InterPro; IPR002890; MG2.  
DR InterPro; IPR041555; MG3.  
DR InterPro; IPR040839; MG4.  
DR InterPro; IPR018933; Netrin\_module\_non-TIMP.  
DR InterPro; IPR008930; Terpenoid\_cyclase/PrenylTrfase.  
DR InterPro; IPR008993; TIMP-like\_OB-fold.  
DR PANTHER; PTHR11412:SF81; PTHR11412:SF81; 1.  
DR Pfam; PF00207; A2M; 1.  
DR Pfam; PF07703; A2M\_BRD; 1.  
DR Pfam; PF07677; A2M\_recep; 1.  
DR Pfam; PF01821; ANATO; 1.  
DR Pfam; PF17790; MG1; 1.  
DR Pfam; PF01835; MG2; 1.  
DR Pfam; PF17791; MG3; 1.  
DR Pfam; PF17789; MG4; 1.  
DR Pfam; PF01759; NTR; 1.  
DR Pfam; PF07678; TED\_complement; 1.

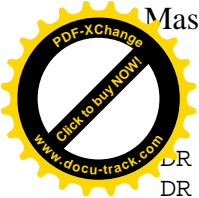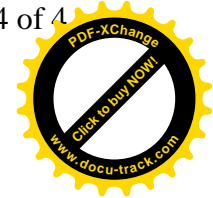

LR PRINTS; PR00004; ANAPHYLATOXN.  
DR SMART; SM01360; A2M; 1.  
DR SMART; SM01359; A2M\_N\_2; 1.  
DR SMART; SM01361; A2M\_recep; 1.  
DR SMART; SM00104; ANATO; 1.  
DR SUPFAM; SSF47686; SSF47686; 1.  
DR SUPFAM; SSF48239; SSF48239; 1.  
DR SUPFAM; SSF49410; SSF49410; 1.  
DR SUPFAM; SSF50242; SSF50242; 1.  
DR PROSITE; PS00477; ALPHA\_2\_MACROGLOBULIN; 1.  
DR PROSITE; PS01178; ANAPHYLATOXIN\_2; 1.  
PE 4: Predicted;  
KW Reference proteome {ECO:0000313|Proteomes:UP000314981}.  
FT DOMAIN 725..760  
FT /note="Anaphylatoxin-like"  
FT /evidence="ECO:0000259|PROSITE:PS01178"  
FT REGION 1..21  
FT /note="Disordered"  
FT /evidence="ECO:0000256|SAM:MobiDB-lite"  
FT COMPIAS 1..19  
FT /note="Pro-rich"  
FT /evidence="ECO:0000256|SAM:MobiDB-lite"  
SQ SEQUENCE 1680 AA; 188712 MW; 8BF7AA0F008ADC2B CRC64;  
MGCEAPPLPP PPPRPQLSA GLRIPCETRD WGRALTLGKG WQPLPGMTA PRPMLPSGRY  
SMITPNILRL ESEETVVLEA HGGQGTIQVS VTVHDFPAKK QVLSNENTQL NSNNGYLSTV  
TIKIPASKEL KSDKGHKFVT VVATFGNVQV EKVVLSLQSG YLFIQTDKT IYTPGSTVLVY  
RVFTVDHKKLL PVGQTVFITI ETPDGIPVKR DSKSSQNQFG ILTSLWNIPE LVNMGVWIKI  
AYYEDSPQQV FSAEFEVKEY VLPSFEVQLE PEEKFYIDD PDGLKVNIIA RFLYGEQVDG  
TAFVIFGVQD GDRRISLTHS LTRVPINDGN GEAILKRQVL LNGVQPSRAD ALVGKSIYVS  
ATVILQSGSD MVEAERTGIP IVTSPYQIHF TKTPKFFKPA MPFDLMVYVT NPDGSPARHI  
PVVTQGSNVQ SLTQDDGVAK LSINTQNKRD PLTITVTRTK DNIPEGRQAT RTMQALPYNT  
QGNSNNYLHL SVPRVELKPG ETLNVNFHLR TDPGEQAKIR YYTYMIMNKG KLLKVGRQYR  
EPGQDLVVLPL LTITSDFIPS FRLVAYYTLI NAKGQREVVA DSVWVDVKDS CMGTLVVKNG  
GKEEKHHRPG QQITLKIAD QGARVGLVAV DKGVFVLNKK NKLTQRKIWD VVEKADIGCT  
PGSGRNYAGV FTDAGLTLKT SQGLETTQRA DPQCPQPATR RRRSVQLMEK RMDKAGQYSS  
DLRKCCEDGM RDNPMKFPCQ RRAQFILQGD ACVKAFLDCC EYITQLRQQH SRDGALELAR  
SDLDDDIPE EDIISRSQFP ESWLWTVIED LKQADKNGIS TKLMNVFLKD SITTWEILAV  
SLSDKKGICV ADPYEVTVMQ DFFIDLRLPY SVVRNEQVEI RAILYNYREA ENLKVRVELL  
YNPAFCSLAT AKKRHQQTIT IPARSSVAVP YVIVPLKIGL HEVEVKAAYV NHFISDGVKK  
TLKVVPGEVR VNKTAVAVRTL NPEHLGQGGV QREEVPAADL SDQVPDTESE TKILLQGTPV  
AQMTEDAIDG ERLKHLIQTP SGCGEQNMIG MTPTVIAVHY LDSTDQWEKF GLEKRQESLE  
LIRKGYTQQL AFRQKSSAYA AFQYRPPSTW LTAYVVKVFA LAANLIAIDS KDLCTVVKWL  
ILEKQKPDGI FQEDGPVIHQ EMIGGFRDTR EKDVSLTAFV LIALHEAKDI CEAQVNSLGR  
SIKAGDFLE NHYRELRRPY TVAIAAYALA LLGKLEGDRL TKFLNTAKEK NRWEEPQKL  
YNVEATSYAL LALLARKDYD TTPPVVRWLN EQRYGGGGYG STQATFMVFQ ALAQYQKDVP  
DHKELNLDVS IQLPSRNSAV RHRILWESAS LLRSEETKEN ERFTVKAEGK GQGTLSVVTV  
YHAKLKGVKS CKKFDLRVSI RPAPETVKKP QDAKGSMLD ICTKYLGDQD ATMSILDISM  
MTGFSPDVED LKTLSTGVDR YISKYEMNRD SNKNTLIIYL DKVSHTVEDC LSKVHQYFN  
VGLIQPGAVK VYSYNNLDET CIRFYHPDKE DGMLSKLCHK DTCRCAEENC FMHTEKEVT  
LEDRLDKACE PGVDYVYKTR LIQKKLEDDF DEYIMVIENI IKSGSATSSG RTPGWSCGPR  
LKNVKMRTR NSARTWPTSQ RTWSSLAAPT DPTHIHPLIH TVHAIKLHFC STCLLKSGGL

//

|                                                                                   |
|-----------------------------------------------------------------------------------|
| Mascot: <a href="http://www.matrixscience.com/">http://www.matrixscience.com/</a> |
|-----------------------------------------------------------------------------------|
