# Supplementary material for: Alpha-2-Macroglobulin as a New Promising Biomarker Improving the Diagnostic Sensitivity of Bovine Paratuberculosis
Source: Frontiers journal article supplement (doi:10.3389/fvets.2021.637716), 2021-03-05
Supplement: Data_Sheet_1.zip [file Data_Sheet_1.zip]

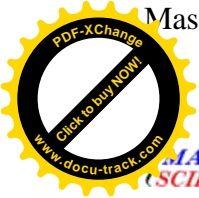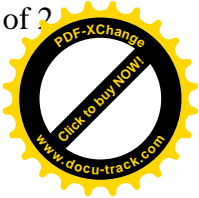

# Mascot Search Results

## Protein View

Match to: [gi|7547266](#) Score: 151 Expect: 2.7e-008  
IgG1 heavy chain constant region [Bos taurus]

Nominal mass ( $M_r$ ): 36510; Calculated pI value: 6.09  
NCBI BLAST search of [gi|7547266](#) against nr  
Unformatted [sequence string](#) for pasting into other applications

Taxonomy: [Bos taurus](#)

Fixed modifications: Carbamidomethyl (C)  
Variable modifications: Oxidation (M)  
Cleavage by Trypsin: cuts C-term side of KR unless next residue is P  
Sequence Coverage: 24%

Matched peptides shown in **Bold Red**

```

1  ASTTAPKVYP  LSSCCGDKSS  STVTLGCLVS  SYMPEPVTVT  WNSGALKSGV
51 HTFPVAVLQSS GLYSLSSMVT  VPGSTSGTQT  FTCNVAHPAS  STKVDKAVDP
101 RCKTTCDCCP  PPELPGGPSV  FIFPPKPKDT  LTISGTPEVT  CVVVDVGHDD
151 PEVKFSWFVD DVEVNTATTK PREEQFNSTY RVVSALRIQH QDWTGGKEFK
201 CKVHNEGLPA PIVRTISRTK GPAREPQVYV LAPPQEELSK STVSLTCMVT
251 SFYPDYIAVE WQRNGQPESE DKYGTTPPQL DADGSYFLYS RLRVDNRNSWQ
301 EGDYTCVVM  HEALHNHYTQ  KSTSKSAGK

```

Show predicted peptides also

Sort Peptides By

☒ Residue Number ☐ Increasing Mass ☐ Decreasing Mass

| Start - End | Observed  | Mr (expt) | Mr (calc) | ppm | Miss | Sequence                    |                                   |
|-------------|-----------|-----------|-----------|-----|------|-----------------------------|-----------------------------------|
| 155 - 172   | 2112.1482 | 2111.1409 | 2111.0324 | 51  | 0    | K.FSWFVDDVEVNTATTKPR.E      | ( <a href="#">Ions score 46</a> ) |
| 155 - 172   | 2112.1482 | 2111.1409 | 2111.0324 | 51  | 0    | K.FSWFVDDVEVNTATTKPR.E      | ( <a href="#">No match</a> )      |
| 188 - 197   | 1169.6356 | 1168.6283 | 1168.5625 | 56  | 0    | R.IQHQDWTGGK.E              | ( <a href="#">No match</a> )      |
| 188 - 197   | 1169.6356 | 1168.6283 | 1168.5625 | 56  | 0    | R.IQHQDWTGGK.E              | ( <a href="#">No match</a> )      |
| 203 - 214   | 1301.8031 | 1300.7958 | 1300.7252 | 54  | 0    | K.VHNEGLPAPIVR.T            | ( <a href="#">No match</a> )      |
| 203 - 214   | 1301.8031 | 1300.7958 | 1300.7252 | 54  | 0    | K.VHNEGLPAPIVR.T            | ( <a href="#">Ions score 51</a> ) |
| 241 - 263   | 2753.4365 | 2752.4292 | 2752.2877 | 51  | 0    | K.STVSLTCMVTsfypdyiaveWQR.N | ( <a href="#">No match</a> )      |
| 241 - 263   | 2753.4365 | 2752.4292 | 2752.2877 | 51  | 0    | K.STVSLTCMVTsfypdyiaveWQR.N | ( <a href="#">No match</a> )      |
| 273 - 291   | 2151.1111 | 2150.1038 | 2149.9957 | 50  | 0    | K.YGTTPQLDADGSYFLYSR.L      | ( <a href="#">Ions score 13</a> ) |
| 273 - 291   | 2151.1111 | 2150.1038 | 2149.9957 | 50  | 0    | K.YGTTPQLDADGSYFLYSR.L      | ( <a href="#">No match</a> )      |

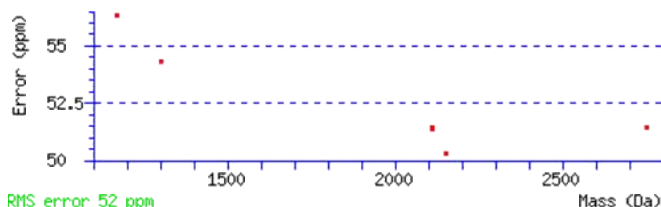

LOCUS AAB37381 329 aa linear MAM 26-JUL-2016  
 DEFINITION IgG1 heavy chain constant region, partial [Bos taurus].  
 ACCESSION AAB37381  
 VERSION AAB37381.2  
 DBSOURCE accession S82409.1  
 KEYWORDS .  
 SOURCE Bos taurus (cattle)  
 ORGANISM Bos taurus  
 Eukaryota; Metazoa; Chordata; Craniata; Vertebrata; Euteleostomi;  
 Mammalia; Eutheria; Laurasiatheria; Cetartiodactyla; Ruminantia;  
 Pecora; Bovidae; Bovinae; Bos.  
 REFERENCE 1 (residues 1 to 329)  
 AUTHORS Kacskovics, I. and Butler, J.E.  
 TITLE The heterogeneity of bovine IgG2--VIII. The complete cDNA sequence  
 of bovine IgG2a (A2) and an IgG1  
 JOURNAL Mol. Immunol. 33 (2), 189-195 (1996)  
 PUBMED 8649440  
 REMARK GenBank staff at the National Library of Medicine created this  
 entry [NCBI gibbsq 178340] from the original journal article.  
 COMMENT On Apr 13, 2000 this sequence version replaced AAB37381.1.  
 Method: conceptual translation supplied by author.  
 FEATURES  
 source  
 Location/Qualifiers  
 1..329  
 /organism="Bos taurus"  
 /strain="breed Holstein-Friesian"  
 /db\_xref="taxon:9913"

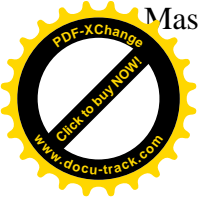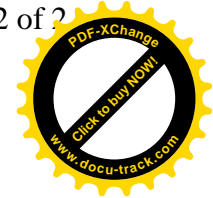

|         |                                                                                             |
|---------|---------------------------------------------------------------------------------------------|
| Protein | /cell_type="peripheral blood leukocytes"                                                    |
|         | /note="A2/A2 allotype"                                                                      |
|         | <1..329                                                                                     |
| Region  | /product="IgG1 heavy chain constant region"                                                 |
|         | 5..96                                                                                       |
|         | /region_name="IgC_CH1"                                                                      |
|         | /note="CH1 domain (first constant Ig domain of the heavy chain) in immunoglobulin; cd04985" |
|         | /db_xref="CDD:143186"                                                                       |
| Site    | order(9..10,12,30,53,55..56,65..66,68)                                                      |
|         | /site_type="other"                                                                          |
|         | /note="heterodimer interface [polypeptide binding]"                                         |
|         | /db_xref="CDD:143186"                                                                       |
| Site    | 61                                                                                          |
|         | /site_type="other"                                                                          |
|         | /note="IgV domain interface [polypeptide binding]"                                          |
|         | /db_xref="CDD:143186"                                                                       |
| Region  | 120..217                                                                                    |
|         | /region_name="Ig"                                                                           |
|         | /note="Immunoglobulin domain; c111960"                                                      |
|         | /db_xref="CDD:299845"                                                                       |
| Region  | 226..322                                                                                    |
|         | /region_name="Ig"                                                                           |
|         | /note="Immunoglobulin domain; c111960"                                                      |
|         | /db_xref="CDD:299845"                                                                       |
| CDS     | 1..329                                                                                      |
|         | /gene="IgC-gamma"                                                                           |
|         | /coded_by="S82409.1:<1..990"                                                                |
|         | /note="conceptual translation presented here differs from translation in publication"       |

**Mascot:** <http://www.matrixscience.com/>
