# Supplementary material for: Alpha-2-Macroglobulin as a New Promising Biomarker Improving the Diagnostic Sensitivity of Bovine Paratuberculosis
Source: Frontiers journal article supplement (doi:10.3389/fvets.2021.637716), 2021-03-05
Supplement: Data_Sheet_1.zip [file Data_Sheet_1.zip]

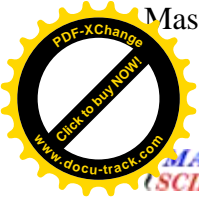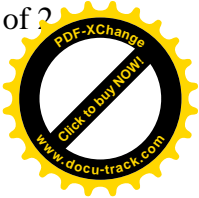

# Mascot Search Results

## Protein View

Match to: **gi|2232299** Score: **50** Expect: **3.1e+002**  
**IgM heavy chain constant region [Bos taurus]**

Nominal mass ( $M_r$ ): **48512**; Calculated pI value: **5.68**  
NCBI BLAST search of [gi|2232299](#) against nr  
Unformatted [sequence string](#) for pasting into other applications

Taxonomy: [Bos taurus](#)

Fixed modifications: Carbamidomethyl (C)  
Variable modifications: Oxidation (M)  
Cleavage by Trypsin: cuts C-term side of KR unless next residue is P  
Sequence Coverage: **16%**

Matched peptides shown in **Bold Red**

```
1  EGESHPRVFP  LVSCVSSPSD  ESTVALGCLA  RDFVPNSVSF  SWKFNNSTVN
51  SERFWTFPEV  LRDGLWSASS  QVLPSSSAF  QGPDDYLVCE  VQHPKGGKTV
101 GTVRVIATKA EVLSPVVSF  VPPRNSLSGD  GNSKSSLIQ  ATDFSPKQIS
151 LSWFRDGKRI  VSGISEGQVE  TVQSSPVTFR  AYSMLTITER  DWLSQNVYTC
201 QVEHNKETFQ  KNVSSSCDVA  PPSPIGVFTI  PPSFADIFLT  KSAKLSCLVT
251 NLASYDGLNI  SWSRQNGKAL  ETHTYFERHL  NDTFSARGEA  SVCSEDWESG
301 EEFCTCTVAH  S  DLFPFKNSV  SKPKDVAMKP  PSVYLLPPTR  EQLSLRESAS
351 VTCLVKGFAP  ADVFVQWLQR  GEPVTKSKYV  TSSPAPEPQD  PSVYFVHSIP
401 TVAEEDWSKG  ETYTCVVGHE  ALPHMVTER  VDKSTGK
```

Show predicted peptides also

Sort Peptides By

☒ Residue Number ☐ Increasing Mass ☐ Decreasing Mass

| Start - End | Observed  | Mr(expt)  | Mr(calc)  | ppm | Miss | Sequence                                         |
|-------------|-----------|-----------|-----------|-----|------|--------------------------------------------------|
| 54 - 62     | 1194.6759 | 1193.6686 | 1193.6233 | 38  | 0    | R.FWTFPEVLR.D ( <a href="#">No match</a> )       |
| 54 - 62     | 1194.6759 | 1193.6686 | 1193.6233 | 38  | 0    | R.FWTFPEVLR.D ( <a href="#">Ions score 18</a> )  |
| 110 - 124   | 1595.9777 | 1594.9704 | 1594.9083 | 39  | 0    | K.AEVLSPVVSFVPPR.N ( <a href="#">No match</a> )  |
| 110 - 124   | 1595.9777 | 1594.9704 | 1594.9083 | 39  | 0    | K.AEVLSPVVSFVPPR.N ( <a href="#">No match</a> )  |
| 148 - 155   | 1036.6012 | 1035.5939 | 1035.5502 | 42  | 0    | K.QISLSWFR.D ( <a href="#">No match</a> )        |
| 148 - 155   | 1036.6012 | 1035.5939 | 1035.5502 | 42  | 0    | K.QISLSWFR.D ( <a href="#">No match</a> )        |
| 269 - 278   | 1266.6686 | 1265.6613 | 1265.6040 | 45  | 0    | K.ALEHTYFER.H ( <a href="#">No match</a> )       |
| 325 - 340   | 1784.0413 | 1783.0340 | 1782.9702 | 36  | 0    | K.DVAMKPPSVYLLPPTRE ( <a href="#">No match</a> ) |
| 357 - 370   | 1633.9124 | 1632.9051 | 1632.8413 | 39  | 0    | K.GFAPADVQWLQR.G ( <a href="#">No match</a> )    |

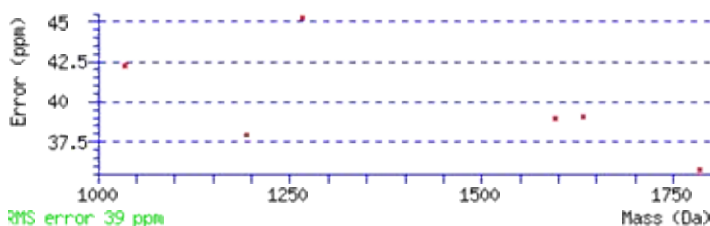

LOCUS AAB62251 437 aa linear MAM 24-JUL-2016  
DEFINITION IgM heavy chain constant region, partial [Bos taurus].  
ACCESSION AAB62251  
VERSION AAB62251.1  
DBSOURCE accession AF005274.1  
KEYWORDS .  
SOURCE Bos taurus (cattle)  
ORGANISM Bos taurus  
Eukaryota; Metazoa; Chordata; Craniata; Vertebrata; Euteleostomi;  
Mammalia; Eutheria; Laurasiatheria; Cetartiodactyla; Ruminantia;  
Pecora; Bovidae; Bovinae; Bos.  
REFERENCE 1 (residues 1 to 437)  
AUTHORS Saini,S.S. and Kaushik,A.  
TITLE Origin of bovine IgM structural variants  
JOURNAL Mol. Immunol. 38 (5), 389-396 (2001)  
PUBMED 11684295  
REFERENCE 2 (residues 1 to 437)  
AUTHORS Saini,S.S. and Kaushik,A.

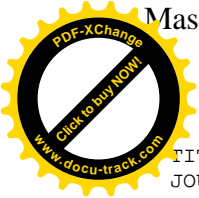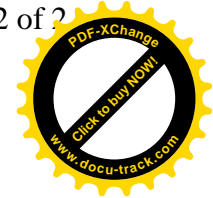

TITLE Structural analysis of a bovine IgM  
JOURNAL Unpublished  
REFERENCE 3 (residues 1 to 437)  
AUTHORS Saini,S.S. and Kaushik,A.  
TITLE Direct Submission  
JOURNAL Submitted (26-MAY-1997) Pathobiology, University of Guelph, Guelph,  
ON N1G 2W1, Canada  
COMMENT Method: conceptual translation.  
FEATURES Location/Qualifiers  
    source 1..437  
        /organism="Bos taurus"  
        /strain="Holstein"  
        /db\_xref="taxon:9913"  
        /cell\_line="BL7G1"  
        /cell\_type="mouse-bovine heterohybridoma"  
        /note="suffering from bovine leukosis"  
    Protein <1..>437  
        /product="IgM heavy chain constant region"  
    Region 6..100  
        /region\_name="Ig"  
        /note="Immunoglobulin domain; cl11960"  
        /db\_xref="CDD:299845"  
    Region 117..214  
        /region\_name="IgC"  
        /note="Immunoglobulin Constant domain; cd00098"  
        /db\_xref="CDD:143166"  
    Site order(118..121,136,138,140,142,179..182,184,186..187,  
        212..214)  
        /site\_type="other"  
        /note="dimer interface [polypeptide binding]"  
        /db\_xref="CDD:143166"  
    Region 227..321  
        /region\_name="Ig"  
        /note="Immunoglobulin domain; cl11960"  
        /db\_xref="CDD:299845"  
    Region 331..432  
        /region\_name="Ig"  
        /note="Immunoglobulin domain; cl11960"  
        /db\_xref="CDD:299845"  
    CDS 1..437  
        /coded\_by="AF005274.1:<1..>1311"

Mascot: <http://www.matrixscience.com/>
