# Supplementary material for: Alpha-2-Macroglobulin as a New Promising Biomarker Improving the Diagnostic Sensitivity of Bovine Paratuberculosis
Source: Frontiers journal article supplement (doi:10.3389/fvets.2021.637716), 2021-03-05
Supplement: Data_Sheet_1.zip [file Data_Sheet_1.zip]

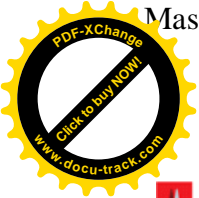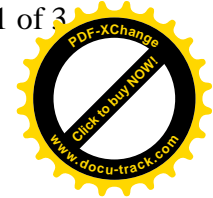

# MASCOT Search Results

## Protein View: Q2KJF1

Alpha-1B-glycoprotein OS=Bos taurus OX=9913 GN=A1BG PE=1 SV=1

Database: Uniprot\_bovine  
Score: 98  
Expect: 2.4e-005  
Nominal mass (Mr): 54091  
Calculated pI: 5.29

Sequence similarity is available as [an NCBI BLAST search of Q2KJF1 against nr.](#)

## Search parameters

Enzyme: Trypsin: cuts C-term side of KR unless next residue is P.  
Fixed modifications: [Carbamidomethyl \(C\)](#)  
Variable modifications: [Oxidation \(M\)](#)

Protein sequence coverage: 23%

Matched peptides shown in **bold red**.

1 MSAWAALLLL WGLSLSPVTE QATFFDPRPS LWAEAGSPLA PWADVTLTCQ  
51 SPLPTQEFQL LKDGVGQEPV HLESPAHEHR **FPLGPTSTT** RGLYRCSYKG  
101 NNDWISPSNL VEVGTAEPLP APSISTSPVS WITPGLNTTL LCLSGLR**GVT**  
151 **FLRL**LEGEDQ FLEVAEAPEA TQATFPVHRA GNYSCSYRTH AAGTPSEPSA  
201 TVTIEELDPP PAPTTLVDRE SAK**VLRPGSS** **ASLTCVAPLS** **GVDFQLR**GA  
251 EEQLVPRAST SPDRVFFR**LS** **ALAAGDGS**GY TCRYLRL**SEL** **AAWSR**SAPA  
301 ELVLSDGTLP APELSAEPAL LSPTPGALVQ LRCRAPRAGV RFALVRKDAG  
351 GRQVQR**VLSP** **AGPEAQFELR** GVSVDGSGNY SCVYVDTSPF FAGSKPSATL  
401 ELRVDGDLPR PQLRALWTGA **LTPGR**DAVLR **CEAEVPDVSF** **LLLR**AGEEEP  
451 LAVAWSTHGP ADLVLTSVGP QHAGTYSCRY RTGGPR**SLLS** **ELSDPVELR**V  
501 AGS

Unformatted sequence string: [503 residues](#) (for pasting into other applications).

Sort peptides by      Residue Number      Increasing Mass      Decreasing Mass

Show predicted peptides also

| Query              | Start - End | Observed  | Mr(expt)  | Mr(calc)  | ppm   | M | Score | Peptide                             |
|--------------------|-------------|-----------|-----------|-----------|-------|---|-------|-------------------------------------|
| <a href="#">37</a> | 81 - 91     | 1175.5778 | 1174.5705 | 1174.6346 | -54.6 | 0 |       | <b>R.FPLGPTSTTR.G</b>               |
| <a href="#">1</a>  | 148 - 154   | 805.4537  | 804.4464  | 804.4858  | -48.9 | 0 |       | <b>R.GVTFLLR.L</b>                  |
| <a href="#">77</a> | 224 - 247   | 2530.2642 | 2529.2569 | 2529.3374 | -31.8 | 0 |       | <b>K.VLRPGSSASLTCVAPLSGVDFQLR.R</b> |
| <a href="#">53</a> | 269 - 283   | 1498.6241 | 1497.6168 | 1497.6882 | -47.6 | 0 |       | <b>R.LSALAAGDGSYTCR.Y</b>           |
| <a href="#">15</a> | 288 - 295   | 919.4136  | 918.4063  | 918.4559  | -54.0 | 0 |       | <b>R.SELAASR.D</b>                  |
| <a href="#">54</a> | 357 - 370   | 1513.7238 | 1512.7165 | 1512.7936 | -51.0 | 0 | 27    | <b>R.VLSPAGPEAQFELR.G</b>           |
| <a href="#">55</a> | 357 - 370   | 1513.7238 | 1512.7165 | 1512.7936 | -51.0 | 0 |       | <b>R.VLSPAGPEAQFELR.G</b>           |
| <a href="#">31</a> | 415 - 425   | 1142.5725 | 1141.5652 | 1141.6244 | -51.8 | 0 |       | <b>R.ALWTGALTPGR.D</b>              |
| <a href="#">32</a> | 415 - 425   | 1142.5725 | 1141.5652 | 1141.6244 | -51.8 | 0 |       | <b>R.ALWTGALTPGR.D</b>              |
| <a href="#">65</a> | 431 - 444   | 1647.7585 | 1646.7512 | 1646.8338 | -50.1 | 0 |       | <b>R.CEAEVPDVSFLLLR.A</b>           |
| <a href="#">66</a> | 431 - 444   | 1647.7585 | 1646.7512 | 1646.8338 | -50.1 | 0 | 27    | <b>R.CEAEVPDVSFLLLR.A</b>           |
| <a href="#">49</a> | 487 - 499   | 1457.7133 | 1456.7060 | 1456.7773 | -48.9 | 0 |       | <b>R.SLLSELSDPVELR.V</b>            |

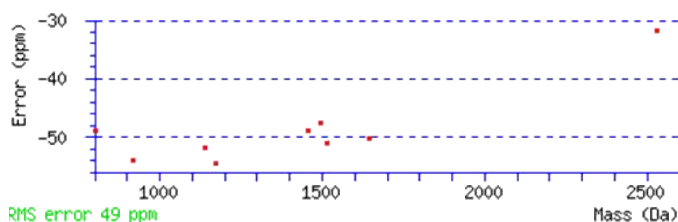

ID A1BG\_BOVIN      Reviewed;      503 AA.  
AC Q2KJF1;

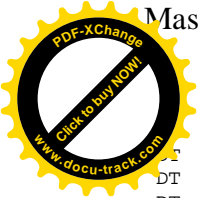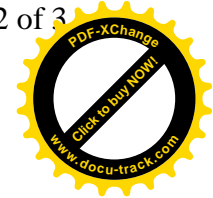

DT 02-SEP-2008, integrated into UniProtKB/Swiss-Prot.  
 DT 07-MAR-2006, sequence version 1.  
 DT 12-AUG-2020, entry version 92.  
 DE RecName: Full=Alpha-1B-glycoprotein {ECO:0000250|UniProtKB:P04217};  
 DE AltName: Full=Alpha-1-B glycoprotein {ECO:0000250|UniProtKB:P04217, ECO:0000312|EMBL:AAI05375.1};  
 DE Flags: Precursor;  
 GN Name=A1BG {ECO:0000312|EMBL:AAI05375.1};  
 OS Bos taurus (Bovine).  
 OC Eukaryota; Metazoa; Chordata; Craniata; Vertebrata; Euteleostomi; Mammalia;  
 OC Eutheria; Laurasiatheria; Artiodactyla; Ruminantia; Pecora; Bovidae;  
 OC Bovinae; Bos.  
 OX NCBI\_TaxID=9913;  
 RN [1] {ECO:0000312|EMBL:AAI05375.1}  
 RP NUCLEOTIDE SEQUENCE [LARGE SCALE MRNA].  
 RC STRAIN=Hereford {ECO:0000312|EMBL:AAI05375.1};  
 RC TISSUE=Testis {ECO:0000312|EMBL:AAI05375.1};  
 RG NIH - Mammalian Gene Collection (MGC) project;  
 RL Submitted (SEP-2005) to the EMBL/GenBank/DBJ databases.  
 RN [2] {ECO:0000305}  
 RP PROTEIN SEQUENCE OF 22-36, INTERACTION WITH CRISP3, AND GLYCOSYLATION.  
 RC TISSUE=Serum {ECO:0000269|PubMed:20116414};  
 RX PubMed=20116414; DOI=10.1016/j.bbagen.2010.01.011;  
 RA Udby L., Johnsen A.H., Borregaard N.;  
 RT "Human CRISP-3 binds serum alpha1B-glycoprotein across species.";  
 RL Biochim. Biophys. Acta 1800:481-485(2010).  
 CC -!- SUBUNIT: Interacts with CRISP3. {ECO:0000269|PubMed:20116414}.  
 CC -!- SUBCELLULAR LOCATION: Secreted {ECO:0000305}.  
 CC -!- TISSUE SPECIFICITY: Plasma. {ECO:0000305}.  
 CC -----  
 CC Copyrighted by the UniProt Consortium, see <https://www.uniprot.org/terms>  
 CC Distributed under the Creative Commons Attribution (CC BY 4.0) License  
 CC -----  
 DR EMBL; BC105374; AAI05375.1; -; mRNA.  
 DR RefSeq; NP\_001039708.1; NM\_001046243.2.  
 DR STRING; 9913.ENSBTAP00000012837; -.  
 DR MEROPS; I43.950; -.  
 DR PaxDb; Q2KJF1; -.  
 DR PeptideAtlas; Q2KJF1; -.  
 DR PRIDE; Q2KJF1; -.  
 DR Ensembl; ENSBTAT00000012837; ENSBTAP00000012837; ENSBTAG00000009735.  
 DR GeneID; 518955; -.  
 DR KEGG; bta:518955; -.  
 DR CTD; 1; -.  
 DR VGNC; VGNC:25433; A1BG.  
 DR eggNOG; ENOG502RYEX; Eukaryota.  
 DR GeneTree; ENSGT00980000198504; -.  
 DR HOGENOM; CLU\_042929\_1\_0\_1; -.  
 DR InParanoid; Q2KJF1; -.  
 DR OMA; IKHQFLL; -.  
 DR OrthoDB; 1327293at2759; -.  
 DR TreeFam; TF336644; -.  
 DR Reactome; R-BTA-114608; Platelet degranulation.  
 DR Reactome; R-BTA-6798695; Neutrophil degranulation.  
 DR Proteomes; UP000009136; Chromosome 18.  
 DR Bgee; ENSBTAG00000009735; Expressed in liver and 4 other tissues.  
 DR ExpressionAtlas; Q2KJF1; baseline and differential.  
 DR GO; GO:0005576; C:extracellular region; IEA:UniProtKB-SubCell.  
 DR Gene3D; 2.60.40.10; -; 5.  
 DR InterPro; IPR016332; A1B\_glyco/leuk\_Ig-like\_rcpt.  
 DR InterPro; IPR007110; Ig-like\_dom.  
 DR InterPro; IPR036179; Ig-like\_dom\_sf.  
 DR InterPro; IPR013783; Ig-like\_fold.  
 DR InterPro; IPR003599; Ig\_sub.  
 DR InterPro; IPR003598; Ig\_sub2.  
 DR Pfam; PF13895; Ig\_2; 1.  
 DR PIRSF; PIRSF001979; Alpha\_1B\_glycoprot\_prd; 1.  
 DR SMART; SM00409; IG; 4.  
 DR SMART; SM00408; IGC2; 4.  
 DR SUPFAM; SSF48726; SSF48726; 5.  
 DR PROSITE; PS50835; IG\_LIKE; 2.  
 PE 1: Evidence at protein level;  
 KW Direct protein sequencing; Disulfide bond; Glycoprotein;  
 KW Immunoglobulin domain; Reference proteome; Repeat; Secreted; Signal.  
 FT SIGNAL 1..21  
 FT /evidence="ECO:0000269|PubMed:20116414"  
 FT CHAIN 22..503  
 FT /note="Alpha-1B-glycoprotein"  
 FT /evidence="ECO:0000269|PubMed:20116414"  
 FT /id="PRO\_0000348606"  
 FT DOMAIN 27..115  
 FT /note="Ig-like V-type 1"  
 FT /evidence="ECO:0000255"  
 FT DOMAIN 117..204  
 FT /note="Ig-like V-type 2"

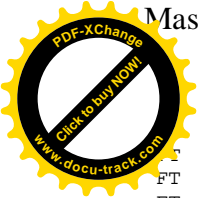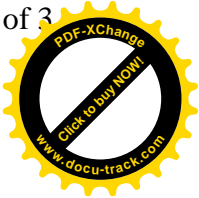

FT DOMAIN /evidence="ECO:0000255"  
208..305  
FT /note="Ig-like V-type 3"  
FT /evidence="ECO:0000255"  
FT DOMAIN 307..405  
FT /note="Ig-like V-type 4"  
FT /evidence="ECO:0000255"  
FT DOMAIN 406..501  
FT /note="Ig-like V-type 5"  
FT /evidence="ECO:0000255"  
FT CARBOHYD 137  
FT /note="N-linked (GlcNAc...) asparagine"  
FT /evidence="ECO:0000255"  
FT CARBOHYD 182  
FT /note="N-linked (GlcNAc...) asparagine"  
FT /evidence="ECO:0000255"  
FT CARBOHYD 379  
FT /note="N-linked (GlcNAc...) asparagine"  
FT /evidence="ECO:0000255"  
FT DISULFID 49..96  
FT /evidence="ECO:0000250|UniProtKB:P04217,  
FT ECO:0000255|PROSITE-ProRule:PRU00114"  
FT DISULFID 142..185  
FT /evidence="ECO:0000250|UniProtKB:P04217,  
FT ECO:0000255|PROSITE-ProRule:PRU00114"  
FT DISULFID 235..282  
FT /evidence="ECO:0000250|UniProtKB:P04217,  
FT ECO:0000255|PROSITE-ProRule:PRU00114"  
FT DISULFID 333..382  
FT /evidence="ECO:0000250|UniProtKB:P04217,  
FT ECO:0000255|PROSITE-ProRule:PRU00114"  
FT DISULFID 431..478  
FT /evidence="ECO:0000250|UniProtKB:P04217,  
FT ECO:0000255|PROSITE-ProRule:PRU00114"  
SQ SEQUENCE 503 AA; 53554 MW; 22643DBA75DD4435 CRC64;  
MSAWAALLLL WGLSLSPVTE QATFFDPRPS LWAEAGSPLA PWADVTLTCQ SPLPTQEFQL  
LKDGVGQEPV HLESPAHEHR FPLGPVTSTT RGLYRCSYKG NNDWISPSNL VEVGTGAEPLP  
APSISTSPVS WITPGLNTTL LCLSGLRGVT FLLRLEGEDQ FLEVAEAEPA TQATFPVHRA  
GNYSYRTH AAGTPSEPSA TVTIEELDPP PAPTTLVDRE SAKVLRPGSS ASLTCVAPLS  
GVDFQLRRGA EEQLVPRAST SPDRVFFRLS ALAAGDGSY TCRYRLRSEL AAWSRDSAPA  
ELVLSDGTLA PELSAEPAI LSPTPGALVQ LRCRAPRAGV RFALVRKDAG GRQVQVRLSP  
AGPEAQFELR GVSVDGSGNY SCVYVDTSPF FAGSKPSATL ELRVDGGLPR PQLRALWTGA  
LTPGRDAVLR CEAEVPDVSF LLLRAGEEEP LAVAWSTHGP ADLVLTSVGP QHAGTYSCRY  
RTGGPRSLLS ELSDPVELRV AGS  
//

Mascot: <http://www.matrixscience.com/>
