# Supplementary material for: Alpha-2-Macroglobulin as a New Promising Biomarker Improving the Diagnostic Sensitivity of Bovine Paratuberculosis
Source: Frontiers journal article supplement (doi:10.3389/fvets.2021.637716), 2021-03-05
Supplement: Data_Sheet_1.zip [file Data_Sheet_1.zip]

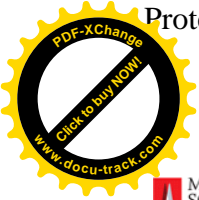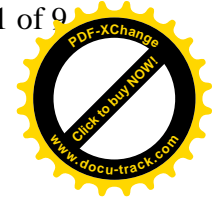

# MASCOT Search Results

User :  
 Email :  
 Search title : BAEDW\2020\_3\_5\2020\_3\_5\MSMS 14\N19  
 Database : Uniprot\_bovine bovine\_20200316 (134392 sequences; 76244912 residues)  
 Timestamp : 31 Mar 2020 at 01:08:58 GMT  
 Warning : A Peptide summary report will usually give a much clearer picture of MS/MS search results.  
 Top Score : 98 for Q2KJF1, Alpha-1B-glycoprotein OS=Bos taurus OX=9913 GN=ALBG PE=1 SV=1

## Mascot Score Histogram

Protein score is  $-10 \cdot \log(P)$ , where P is the probability that the observed match is a random event.  
 Protein scores greater than 64 are significant ( $p < 0.05$ ).  
 Protein scores are derived from ions scores as a non-probabilistic basis for ranking protein hits.

Error: try setting browser cache to automatic.

## Protein Summary Report

Format As Protein Summary (deprecated) [Help](#)

Significance threshold  $p < 0.05$  Max. number of hits 30

Preferred taxonomy All entries

## Index

|     | Accession                  | Mass   | Score | Description                                                                                           |
|-----|----------------------------|--------|-------|-------------------------------------------------------------------------------------------------------|
| 1.  | <a href="#">Q2KJF1</a>     | 54091  | 98    | Alpha-1B-glycoprotein OS=Bos taurus OX=9913 GN=ALBG PE=1 SV=1                                         |
| 2.  | <a href="#">A0A4W2GYB4</a> | 54132  | 97    | Alpha-1-B glycoprotein OS=Bos indicus x Bos taurus OX=30522 GN=ALBG PE=4 SV=1                         |
| 3.  | <a href="#">A0A4W2E798</a> | 54147  | 97    | Alpha-1-B glycoprotein OS=Bos indicus x Bos taurus OX=30522 GN=ALBG PE=4 SV=1                         |
| 4.  | <a href="#">A0A4W2IFR5</a> | 54987  | 97    | Alpha-1-B glycoprotein OS=Bos indicus x Bos taurus OX=30522 GN=ALBG PE=4 SV=1                         |
| 5.  | <a href="#">A0A4W2EBB7</a> | 55003  | 97    | Alpha-1-B glycoprotein OS=Bos indicus x Bos taurus OX=30522 GN=ALBG PE=4 SV=1                         |
| 6.  | <a href="#">A0A4W2H1C4</a> | 60879  | 94    | Alpha-1-B glycoprotein OS=Bos indicus x Bos taurus OX=30522 GN=ALBG PE=4 SV=1                         |
| 7.  | <a href="#">A0A3Q1MJT2</a> | 62948  | 93    | Alpha-1B-glycoprotein OS=Bos taurus OX=9913 GN=ALBG PE=1 SV=1                                         |
| 8.  | <a href="#">A0A4W2EKQ3</a> | 63006  | 93    | Alpha-1-B glycoprotein OS=Bos indicus x Bos taurus OX=30522 GN=ALBG PE=4 SV=1                         |
| 9.  | <a href="#">A0A4W2IGA3</a> | 80257  | 50    | Kinesin-like protein OS=Bos indicus x Bos taurus OX=30522 GN=KIF3B PE=3 SV=1                          |
| 10. | <a href="#">A0A3Q1MG81</a> | 80257  | 50    | Kinesin-like protein OS=Bos taurus OX=9913 GN=KIF3B PE=3 SV=1                                         |
| 11. | <a href="#">A0A4W2H2X1</a> | 84971  | 49    | Kinesin-like protein OS=Bos indicus x Bos taurus OX=30522 GN=KIF3B PE=3 SV=1                          |
| 12. | <a href="#">F1N020</a>     | 84971  | 49    | Kinesin-like protein OS=Bos taurus OX=9913 GN=KIF3B PE=3 SV=2                                         |
| 13. | <a href="#">A0A4W2F5Q7</a> | 26142  | 41    | Peroxisomal protein 2A OS=Bos indicus x Bos taurus OX=30522 GN=PRXL2A PE=4 SV=1                       |
| 14. | <a href="#">A0A3Q1LNN7</a> | 68022  | 41    | Serum albumin OS=Bos taurus OX=9913 GN=ALB PE=4 SV=1                                                  |
| 15. | <a href="#">A0A452DI98</a> | 15508  | 41    | U6 snRNA-associated Sm-like protein LSM4 OS=Bos taurus OX=9913 GN=LSM4 PE=3 SV=1                      |
| 16. | <a href="#">A0A4W2FGN9</a> | 123016 | 40    | Coiled-coil domain containing 150 OS=Bos indicus x Bos taurus OX=30522 GN=CCDC150 PE=4 SV=1           |
| 17. | <a href="#">A0A4W2I014</a> | 105104 | 40    | Protein phosphatase 1 regulatory subunit 21 OS=Bos indicus x Bos taurus OX=30522 GN=PPP1R21 PE=4 SV=1 |
| 18. | <a href="#">A0A4W2CGR1</a> | 105032 | 40    | Protein phosphatase 1 regulatory subunit 21 OS=Bos indicus x Bos taurus OX=30522 GN=PPP1R21 PE=4 SV=1 |
| 19. | <a href="#">A0A4W2DDL5</a> | 70207  | 40    | Albumin OS=Bos indicus x Bos taurus OX=30522 GN=ALB PE=4 SV=1                                         |
| 20. | <a href="#">A0A140T897</a> | 71274  | 40    | Serum albumin OS=Bos taurus OX=9913 GN=ALB PE=4 SV=1                                                  |
| 21. | <a href="#">A0A4W2EVR9</a> | 71453  | 40    | Albumin OS=Bos indicus x Bos taurus OX=30522 GN=ALB PE=4 SV=1                                         |
| 22. | <a href="#">A0A4W2DGX3</a> | 13967  | 40    | U6 snRNA-associated Sm-like protein LSM4 OS=Bos indicus x Bos taurus OX=30522 GN=LSM4 PE=3 SV=1       |
| 23. | <a href="#">A0A4W2HT62</a> | 15511  | 39    | U6 snRNA-associated Sm-like protein LSM4 OS=Bos indicus x Bos taurus OX=30522 GN=LSM4 PE=3 SV=1       |
| 24. | <a href="#">Q3ZBK6</a>     | 15511  | 39    | U6 snRNA-associated Sm-like protein LSM4 OS=Bos taurus OX=9913 GN=LSM4 PE=2 SV=1                      |
| 25. | <a href="#">A0A4W2EW60</a> | 76020  | 39    | Albumin OS=Bos indicus x Bos taurus OX=30522 GN=ALB PE=4 SV=1                                         |
| 26. | <a href="#">A0A4W2D8T3</a> | 76089  | 39    | Albumin OS=Bos indicus x Bos taurus OX=30522 GN=ALB PE=4 SV=1                                         |
| 27. | <a href="#">A0A4W2HAU5</a> | 24454  | 38    | Peroxisomal protein 2A OS=Bos indicus x Bos taurus OX=30522 GN=PRXL2A PE=4 SV=1                       |
| 28. | <a href="#">Q3ZBK2</a>     | 24454  | 38    | Peroxisomal protein 2A OS=Bos taurus OX=9913 GN=PRXL2A PE=2 SV=1                                      |
| 29. | <a href="#">A0A4W2H5Z2</a> | 33370  | 37    | Ketohexokinase OS=Bos indicus x Bos taurus OX=30522 GN=KHK PE=4 SV=1                                  |
| 30. | <a href="#">P02769</a>     | 71244  | 36    | Serum albumin OS=Bos taurus OX=9913 GN=ALB PE=1 SV=4                                                  |

## Results List

| 1.                                                                                                                                                                                                                                                                                                                                                                     | <a href="#">Q2KJF1</a> | Mass: 54091 | Score: 98 | Expect: 2.4e-005 | Matches: 12                        |
|------------------------------------------------------------------------------------------------------------------------------------------------------------------------------------------------------------------------------------------------------------------------------------------------------------------------------------------------------------------------|------------------------|-------------|-----------|------------------|------------------------------------|
| Alpha-1B-glycoprotein OS=Bos taurus OX=9913 GN=ALBG PE=1 SV=1                                                                                                                                                                                                                                                                                                          |                        |             |           |                  |                                    |
| Observed                                                                                                                                                                                                                                                                                                                                                               | Mr (expt)              | Mr (calc)   | ppm       | Start            | End Miss Ions Peptide              |
| 805.4537                                                                                                                                                                                                                                                                                                                                                               | 804.4464               | 804.4858    | -48.92    | 148 - 154        | 0 --- R.GVTFLLR.L                  |
| 919.4136                                                                                                                                                                                                                                                                                                                                                               | 918.4063               | 918.4559    | -53.98    | 288 - 295        | 0 --- R.SELAAWSR.D                 |
| 1142.5725                                                                                                                                                                                                                                                                                                                                                              | 1141.5652              | 1141.6244   | -51.83    | 415 - 425        | 0 --- R.ALWTGALTPGR.D              |
| 1142.5725                                                                                                                                                                                                                                                                                                                                                              | 1141.5652              | 1141.6244   | -51.82    | 415 - 425        | 0 --- R.ALWTGALTPGR.D              |
| 1175.5778                                                                                                                                                                                                                                                                                                                                                              | 1174.5705              | 1174.6346   | -54.59    | 81 - 91          | 0 --- R.FPLGPVTSFTR.G              |
| 1457.7133                                                                                                                                                                                                                                                                                                                                                              | 1456.7060              | 1456.7773   | -48.93    | 487 - 499        | 0 --- R.SLLSELSDPVELR.V            |
| 1498.6241                                                                                                                                                                                                                                                                                                                                                              | 1497.6168              | 1497.6882   | -47.65    | 269 - 283        | 0 --- R.LSALAAGDGSYGTCR.Y          |
| 1513.7238                                                                                                                                                                                                                                                                                                                                                              | 1512.7165              | 1512.7936   | -51.00    | 357 - 370        | 0 27 R.VLSPAGPEAQFELR.G            |
| 1513.7238                                                                                                                                                                                                                                                                                                                                                              | 1512.7165              | 1512.7936   | -50.97    | 357 - 370        | 0 --- R.VLSPAGPEAQFELR.G           |
| 1647.7585                                                                                                                                                                                                                                                                                                                                                              | 1646.7512              | 1646.8338   | -50.13    | 431 - 444        | 0 --- R.CEAEPVDVSFLLLR.A           |
| 1647.7585                                                                                                                                                                                                                                                                                                                                                              | 1646.7513              | 1646.8338   | -50.11    | 431 - 444        | 0 27 R.CEAEPVDVSFLLLR.A            |
| 2530.2642                                                                                                                                                                                                                                                                                                                                                              | 2529.2569              | 2529.3374   | -31.80    | 224 - 247        | 0 --- K.VLRPGSSASLTCVAPLSGVDFQLR.R |
| No match to: 842.4627, 848.4779, 850.0055, 850.4871, 853.4691, 864.5048, 865.9789, 868.4995, 870.5005, 876.9857, 882.5121, 882.5121, 892.9567, 927.4397, 951.5660, 982.5261, 996.5410, 1017.6141, 1017.6141, 1019.6234, 1033.6417, 1045.5149, 1051.6498, 1051.6498, 1065.5970, 1131.6476, 1133.6560, 1136.6389, 1147.6736, 1151.6641, 1165.6772, 1165.6773, 1194.5631, |                        |             |           |                  |                                    |

1300.7844, 1302.7943, 1316.8119, 1334.8163, 1334.8163, 1351.5889, 1414.8141, 1434.8339, 1448.8483, 1448.8483, 1475.6820, 1479.7203, 1479.7203, 1557.7402, 1567.6654, 1567.6654, 1583.9542, 1615.7332, 1617.9894, 1617.9894, 1630.7391, 1633.7523, 1697.8313, 1724.7576, 1732.0159, 1901.1652, 2015.1964, 2044.9374, 2184.3481, 2211.0227, 2283.0957, 2305.0806

2.

AOA4W2GYB4

Mass: 54132

Score: 97

Expect: 2.4e-005

Matches: 12

Alpha-1-B glycoprotein OS=Bos indicus x Bos taurus OX=30522 GN=ALBG PE=4 SV=1

| Observed  | Mr(expt)  | Mr(calc)  | ppm    | Start | End | Miss | Ions | Peptide                      |
|-----------|-----------|-----------|--------|-------|-----|------|------|------------------------------|
| 805.4537  | 804.4464  | 804.4858  | -48.92 | 142   | 148 | 0    | ---  | R.GVTFLLR.L                  |
| 919.4136  | 918.4063  | 918.4559  | -53.98 | 282   | 289 | 0    | ---  | R.SELAAWSR.D                 |
| 1142.5725 | 1141.5652 | 1141.6244 | -51.83 | 417   | 427 | 0    | ---  | R.ALWTGALTPGR.D              |
| 1142.5725 | 1141.5652 | 1141.6244 | -51.82 | 417   | 427 | 0    | ---  | R.ALWTGALTPGR.D              |
| 1175.5778 | 1174.5705 | 1174.6346 | -54.59 | 75    | 85  | 0    | ---  | R.FPLGPVTSTTR.G              |
| 1457.7133 | 1456.7060 | 1456.7773 | -48.93 | 489   | 501 | 0    | ---  | R.SLLSELSDPVELR.V            |
| 1498.6241 | 1497.6168 | 1497.6882 | -47.65 | 263   | 277 | 0    | ---  | R.LSALAAGDGSGYTCR.Y          |
| 1513.7238 | 1512.7165 | 1512.7936 | -51.00 | 351   | 364 | 0    | 27   | R.VLSPAGPEAQFELR.G           |
| 1513.7238 | 1512.7165 | 1512.7936 | -50.97 | 351   | 364 | 0    | ---  | R.VLSPAGPEAQFELR.G           |
| 1647.7585 | 1646.7512 | 1646.8338 | -50.13 | 433   | 446 | 0    | ---  | R.CEAEVPDVSFLLLR.A           |
| 1647.7585 | 1646.7513 | 1646.8338 | -50.11 | 433   | 446 | 0    | 27   | R.CEAEVPDVSFLLLR.A           |
| 2530.2642 | 2529.2569 | 2529.3374 | -31.80 | 218   | 241 | 0    | ---  | K.VLRPGSSASLTCVAPLSGVDFQLR.R |

No match to: 842.4627, 848.4779, 850.0055, 850.4871, 853.4691, 864.5048, 865.9789, 868.4995, 870.5005, 876.9857, 882.5121, 882.5121, 892.9567, 927.4397, 951.5660, 982.5261, 996.5410, 1017.6141, 1017.6141, 1019.6234, 1033.6417, 1045.5149, 1051.6498, 1051.6498, 1065.5970, 1131.6476, 1133.6560, 1136.6389, 1147.6736, 1151.6641, 1165.6772, 1165.6773, 1194.5631, 1300.7844, 1302.7943, 1316.8119, 1334.8163, 1334.8163, 1351.5889, 1414.8141, 1434.8339, 1448.8483, 1448.8483, 1475.6820, 1479.7203, 1479.7203, 1557.7402, 1567.6654, 1567.6654, 1583.9542, 1615.7332, 1617.9894, 1617.9894, 1630.7391, 1633.7523, 1697.8313, 1724.7576, 1732.0159, 1901.1652, 2015.1964, 2044.9374, 2184.3481, 2211.0227, 2283.0957, 2305.0806

3.

AOA4W2E798

Mass: 54147

Score: 97

Expect: 2.4e-005

Matches: 12

Alpha-1-B glycoprotein OS=Bos indicus x Bos taurus OX=30522 GN=ALBG PE=4 SV=1

| Observed  | Mr(expt)  | Mr(calc)  | ppm    | Start | End | Miss | Ions | Peptide                      |
|-----------|-----------|-----------|--------|-------|-----|------|------|------------------------------|
| 805.4537  | 804.4464  | 804.4858  | -48.92 | 142   | 148 | 0    | ---  | R.GVTFLLR.L                  |
| 919.4136  | 918.4063  | 918.4559  | -53.98 | 282   | 289 | 0    | ---  | R.SELAAWSR.D                 |
| 1142.5725 | 1141.5652 | 1141.6244 | -51.83 | 417   | 427 | 0    | ---  | R.ALWTGALTPGR.D              |
| 1142.5725 | 1141.5652 | 1141.6244 | -51.82 | 417   | 427 | 0    | ---  | R.ALWTGALTPGR.D              |
| 1175.5778 | 1174.5705 | 1174.6346 | -54.59 | 75    | 85  | 0    | ---  | R.FPLGPVTSTTR.G              |
| 1457.7133 | 1456.7060 | 1456.7773 | -48.93 | 489   | 501 | 0    | ---  | R.SLLSELSDPVELR.V            |
| 1498.6241 | 1497.6168 | 1497.6882 | -47.65 | 263   | 277 | 0    | ---  | R.LSALAAGDGSGYTCR.Y          |
| 1513.7238 | 1512.7165 | 1512.7936 | -51.00 | 351   | 364 | 0    | 27   | R.VLSPAGPEAQFELR.G           |
| 1513.7238 | 1512.7165 | 1512.7936 | -50.97 | 351   | 364 | 0    | ---  | R.VLSPAGPEAQFELR.G           |
| 1647.7585 | 1646.7512 | 1646.8338 | -50.13 | 433   | 446 | 0    | ---  | R.CEAEVPDVSFLLLR.A           |
| 1647.7585 | 1646.7513 | 1646.8338 | -50.11 | 433   | 446 | 0    | 27   | R.CEAEVPDVSFLLLR.A           |
| 2530.2642 | 2529.2569 | 2529.3374 | -31.80 | 218   | 241 | 0    | ---  | K.VLRPGSSASLTCVAPLSGVDFQLR.R |

No match to: 842.4627, 848.4779, 850.0055, 850.4871, 853.4691, 864.5048, 865.9789, 868.4995, 870.5005, 876.9857, 882.5121, 882.5121, 892.9567, 927.4397, 951.5660, 982.5261, 996.5410, 1017.6141, 1017.6141, 1019.6234, 1033.6417, 1045.5149, 1051.6498, 1051.6498, 1065.5970, 1131.6476, 1133.6560, 1136.6389, 1147.6736, 1151.6641, 1165.6772, 1165.6773, 1194.5631, 1300.7844, 1302.7943, 1316.8119, 1334.8163, 1334.8163, 1351.5889, 1414.8141, 1434.8339, 1448.8483, 1448.8483, 1475.6820, 1479.7203, 1479.7203, 1557.7402, 1567.6654, 1567.6654, 1583.9542, 1615.7332, 1617.9894, 1617.9894, 1630.7391, 1633.7523, 1697.8313, 1724.7576, 1732.0159, 1901.1652, 2015.1964, 2044.9374, 2184.3481, 2211.0227, 2283.0957, 2305.0806

4.

AOA4W2IFR5

Mass: 54987

Score: 97

Expect: 2.6e-005

Matches: 12

Alpha-1-B glycoprotein OS=Bos indicus x Bos taurus OX=30522 GN=ALBG PE=4 SV=1

| Observed  | Mr(expt)  | Mr(calc)  | ppm    | Start | End | Miss | Ions | Peptide                      |
|-----------|-----------|-----------|--------|-------|-----|------|------|------------------------------|
| 805.4537  | 804.4464  | 804.4858  | -48.92 | 148   | 154 | 0    | ---  | R.GVTFLLR.L                  |
| 919.4136  | 918.4063  | 918.4559  | -53.98 | 288   | 295 | 0    | ---  | R.SELAAWSR.D                 |
| 1142.5725 | 1141.5652 | 1141.6244 | -51.83 | 423   | 433 | 0    | ---  | R.ALWTGALTPGR.D              |
| 1142.5725 | 1141.5652 | 1141.6244 | -51.82 | 423   | 433 | 0    | ---  | R.ALWTGALTPGR.D              |
| 1175.5778 | 1174.5705 | 1174.6346 | -54.59 | 81    | 91  | 0    | ---  | R.FPLGPVTSTTR.G              |
| 1457.7133 | 1456.7060 | 1456.7773 | -48.93 | 495   | 507 | 0    | ---  | R.SLLSELSDPVELR.V            |
| 1498.6241 | 1497.6168 | 1497.6882 | -47.65 | 269   | 283 | 0    | ---  | R.LSALAAGDGSGYTCR.Y          |
| 1513.7238 | 1512.7165 | 1512.7936 | -51.00 | 357   | 370 | 0    | 27   | R.VLSPAGPEAQFELR.G           |
| 1513.7238 | 1512.7165 | 1512.7936 | -50.97 | 357   | 370 | 0    | ---  | R.VLSPAGPEAQFELR.G           |
| 1647.7585 | 1646.7512 | 1646.8338 | -50.13 | 439   | 452 | 0    | ---  | R.CEAEVPDVSFLLLR.A           |
| 1647.7585 | 1646.7513 | 1646.8338 | -50.11 | 439   | 452 | 0    | 27   | R.CEAEVPDVSFLLLR.A           |
| 2530.2642 | 2529.2569 | 2529.3374 | -31.80 | 224   | 247 | 0    | ---  | K.VLRPGSSASLTCVAPLSGVDFQLR.R |

No match to: 842.4627, 848.4779, 850.0055, 850.4871, 853.4691, 864.5048, 865.9789, 868.4995, 870.5005, 876.9857, 882.5121, 882.5121, 892.9567, 927.4397, 951.5660, 982.5261, 996.5410, 1017.6141, 1017.6141, 1019.6234, 1033.6417, 1045.5149, 1051.6498, 1051.6498, 1065.5970, 1131.6476, 1133.6560, 1136.6389, 1147.6736, 1151.6641, 1165.6772, 1165.6773, 1194.5631, 1300.7844, 1302.7943, 1316.8119, 1334.8163, 1334.8163, 1351.5889, 1414.8141, 1434.8339, 1448.8483, 1448.8483, 1475.6820, 1479.7203, 1479.7203, 1557.7402, 1567.6654, 1567.6654, 1583.9542, 1615.7332, 1617.9894, 1617.9894, 1630.7391, 1633.7523, 1697.8313, 1724.7576, 1732.0159, 1901.1652, 2015.1964, 2044.9374, 2184.3481, 2211.0227, 2283.0957, 2305.0806

5.

AOA4W2E8B7

Mass: 55003

Score: 97

Expect: 2.6e-005

Matches: 12

Alpha-1-B glycoprotein OS=Bos indicus x Bos taurus OX=30522 GN=ALBG PE=4 SV=1

| Observed  | Mr(expt)  | Mr(calc)  | ppm    | Start | End | Miss | Ions | Peptide                      |
|-----------|-----------|-----------|--------|-------|-----|------|------|------------------------------|
| 805.4537  | 804.4464  | 804.4858  | -48.92 | 148   | 154 | 0    | ---  | R.GVTFLLR.L                  |
| 919.4136  | 918.4063  | 918.4559  | -53.98 | 288   | 295 | 0    | ---  | R.SELAAWSR.D                 |
| 1142.5725 | 1141.5652 | 1141.6244 | -51.83 | 423   | 433 | 0    | ---  | R.ALWTGALTPGR.D              |
| 1142.5725 | 1141.5652 | 1141.6244 | -51.82 | 423   | 433 | 0    | ---  | R.ALWTGALTPGR.D              |
| 1175.5778 | 1174.5705 | 1174.6346 | -54.59 | 81    | 91  | 0    | ---  | R.FPLGPVTSTTR.G              |
| 1457.7133 | 1456.7060 | 1456.7773 | -48.93 | 495   | 507 | 0    | ---  | R.SLLSELSDPVELR.V            |
| 1498.6241 | 1497.6168 | 1497.6882 | -47.65 | 269   | 283 | 0    | ---  | R.LSALAAGDGSGYTCR.Y          |
| 1513.7238 | 1512.7165 | 1512.7936 | -51.00 | 357   | 370 | 0    | 27   | R.VLSPAGPEAQFELR.G           |
| 1513.7238 | 1512.7165 | 1512.7936 | -50.97 | 357   | 370 | 0    | ---  | R.VLSPAGPEAQFELR.G           |
| 1647.7585 | 1646.7512 | 1646.8338 | -50.13 | 439   | 452 | 0    | ---  | R.CEAEVPDVSFLLLR.A           |
| 1647.7585 | 1646.7513 | 1646.8338 | -50.11 | 439   | 452 | 0    | 27   | R.CEAEVPDVSFLLLR.A           |
| 2530.2642 | 2529.2569 | 2529.3374 | -31.80 | 224   | 247 | 0    | ---  | K.VLRPGSSASLTCVAPLSGVDFQLR.R |

No match to: 842.4627, 848.4779, 850.0055, 850.4871, 853.4691, 864.5048, 865.9789, 868.4995, 870.5005, 876.9857, 882.5121, 882.5121, 892.9567, 927.4397, 951.5660, 982.5261, 996.5410, 1017.6141, 1017.6141, 1019.6234, 1033.6417, 1045.5149, 1051.6498, 1051.6498, 1065.5970, 1131.6476, 1133.6560, 1136.6389, 1147.6736, 1151.6641, 1165.6772, 1165.6773, 1194.5631, 1300.7844, 1302.7943, 1316.8119, 1334.8163, 1334.8163, 1351.5889, 1414.8141, 1434.8339, 1448.8483, 1448.8483, 1475.6820, 1479.7203, 1479.7203, 1557.7402, 1567.6654, 1567.6654, 1583.9542, 1615.7332, 1617.9894, 1617.9894, 1630.7391, 1633.7523, 1697.8313, 1724.7576, 1732.0159, 1901.1652, 2015.1964, 2044.9374, 2184.3481, 2211.0227, 2283.0957, 2305.0806

6.

AOA4W2H1C4

Mass: 60879

Score: 94

Expect: 5.6e-005

Matches: 12

Alpha-1-B glycoprotein OS=Bos indicus x Bos taurus OX=30522 GN=ALBG PE=4 SV=1

http://203.255.41.217/mascot/cgi/master\_results.pl?file=../data/20200330/F002155.da... 2021-01-19

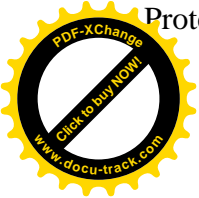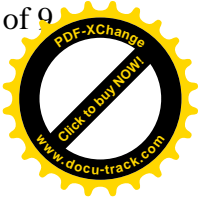

| Observed                                                                                                                                                                                                                                                                                                                                                                                                                                                                                                                                                                                                                                                                                                                              | Mr(expt)  | Mr(calc)  | ppm    | Start | End | Miss | Ions  | Peptide                      |
|---------------------------------------------------------------------------------------------------------------------------------------------------------------------------------------------------------------------------------------------------------------------------------------------------------------------------------------------------------------------------------------------------------------------------------------------------------------------------------------------------------------------------------------------------------------------------------------------------------------------------------------------------------------------------------------------------------------------------------------|-----------|-----------|--------|-------|-----|------|-------|------------------------------|
| 805.4537                                                                                                                                                                                                                                                                                                                                                                                                                                                                                                                                                                                                                                                                                                                              | 804.4464  | 804.4858  | -48.92 | 148   | -   | 154  | 0 --- | R.GVTFLLR.L                  |
| 919.4136                                                                                                                                                                                                                                                                                                                                                                                                                                                                                                                                                                                                                                                                                                                              | 918.4063  | 918.4559  | -53.98 | 288   | -   | 295  | 0 --- | R.SELAAWSR.D                 |
| 1142.5725                                                                                                                                                                                                                                                                                                                                                                                                                                                                                                                                                                                                                                                                                                                             | 1141.5652 | 1141.6244 | -51.83 | 415   | -   | 425  | 0 --- | R.ALWTGALTPGR.D              |
| 1142.5725                                                                                                                                                                                                                                                                                                                                                                                                                                                                                                                                                                                                                                                                                                                             | 1141.5652 | 1141.6244 | -51.82 | 415   | -   | 425  | 0 --- | R.ALWTGALTPGR.D              |
| 1175.5778                                                                                                                                                                                                                                                                                                                                                                                                                                                                                                                                                                                                                                                                                                                             | 1174.5705 | 1174.6346 | -54.59 | 81    | -   | 91   | 0 --- | R.FPLGPGVTSTTR.G             |
| 1457.7133                                                                                                                                                                                                                                                                                                                                                                                                                                                                                                                                                                                                                                                                                                                             | 1456.7060 | 1456.7773 | -48.93 | 487   | -   | 499  | 0 --- | R.SLLSELSDPVELR.V            |
| 1498.6241                                                                                                                                                                                                                                                                                                                                                                                                                                                                                                                                                                                                                                                                                                                             | 1497.6168 | 1497.6882 | -47.65 | 269   | -   | 283  | 0 --- | R.LSALAAGDGSQYTCR.Y          |
| 1513.7238                                                                                                                                                                                                                                                                                                                                                                                                                                                                                                                                                                                                                                                                                                                             | 1512.7165 | 1512.7936 | -51.00 | 357   | -   | 370  | 0 27  | R.VLSPAGPEAQFELR.G           |
| 1513.7238                                                                                                                                                                                                                                                                                                                                                                                                                                                                                                                                                                                                                                                                                                                             | 1512.7165 | 1512.7936 | -50.97 | 357   | -   | 370  | 0 --- | R.VLSPAGPEAQFELR.G           |
| 1647.7585                                                                                                                                                                                                                                                                                                                                                                                                                                                                                                                                                                                                                                                                                                                             | 1646.7512 | 1646.8338 | -50.13 | 431   | -   | 444  | 0 --- | R.CEAEVPDVSFLLLR.A           |
| 1647.7585                                                                                                                                                                                                                                                                                                                                                                                                                                                                                                                                                                                                                                                                                                                             | 1646.7513 | 1646.8338 | -50.11 | 431   | -   | 444  | 0 27  | R.CEAEVPDVSFLLLR.A           |
| 2530.2642                                                                                                                                                                                                                                                                                                                                                                                                                                                                                                                                                                                                                                                                                                                             | 2529.2569 | 2529.3374 | -31.80 | 224   | -   | 247  | 0 --- | K.VLRPGSSASLTCVAPLSGVDFQLR.R |
| No match to: 842.4627, 848.4779, 850.0055, 850.4871, 853.4691, 864.5048, 865.9789, 868.4995, 870.5005, 876.9857, 882.5121, 882.5121, 892.9567, 927.4397, 951.5660, 982.5261, 996.5410, 1017.6141, 1017.6141, 1019.6234, 1033.6417, 1045.5149, 1051.6498, 1051.6498, 1065.5970, 1131.6476, 1133.6560, 1136.6389, 1147.6736, 1151.6641, 1165.6772, 1165.6773, 1194.5631, 1300.7844, 1302.7943, 1316.8119, 1334.8163, 1334.8163, 1351.5889, 1414.8141, 1434.8339, 1448.8483, 1448.8483, 1475.6820, 1479.7203, 1479.7203, 1557.7402, 1567.6654, 1567.6654, 1583.9542, 1615.7332, 1617.9894, 1617.9894, 1630.7391, 1633.7523, 1697.8313, 1724.7576, 1732.0159, 1901.1652, 2015.1964, 2044.9374, 2184.3481, 2211.0227, 2283.0957, 2305.0806 |           |           |        |       |     |      |       |                              |

7. [A0A3Q1MJT2](#) Mass: 62948 Score: 93 Expect: 7.1e-005 Matches: 12

Alpha-1B-glycoprotein OS=Bos taurus OX=9913 GN=AlBG PE=1 SV=1

| Observed                                                                                                                                                                                                                                                                                                                                                                                                                                                                                                                                                                                                                                                                                                                              | Mr(expt)  | Mr(calc)  | ppm    | Start | End | Miss | Ions  | Peptide                      |
|---------------------------------------------------------------------------------------------------------------------------------------------------------------------------------------------------------------------------------------------------------------------------------------------------------------------------------------------------------------------------------------------------------------------------------------------------------------------------------------------------------------------------------------------------------------------------------------------------------------------------------------------------------------------------------------------------------------------------------------|-----------|-----------|--------|-------|-----|------|-------|------------------------------|
| 805.4537                                                                                                                                                                                                                                                                                                                                                                                                                                                                                                                                                                                                                                                                                                                              | 804.4464  | 804.4858  | -48.92 | 148   | -   | 154  | 0 --- | R.GVTFLLR.L                  |
| 919.4136                                                                                                                                                                                                                                                                                                                                                                                                                                                                                                                                                                                                                                                                                                                              | 918.4063  | 918.4559  | -53.98 | 288   | -   | 295  | 0 --- | R.SELAAWSR.D                 |
| 1142.5725                                                                                                                                                                                                                                                                                                                                                                                                                                                                                                                                                                                                                                                                                                                             | 1141.5652 | 1141.6244 | -51.83 | 415   | -   | 425  | 0 --- | R.ALWTGALTPGR.D              |
| 1142.5725                                                                                                                                                                                                                                                                                                                                                                                                                                                                                                                                                                                                                                                                                                                             | 1141.5652 | 1141.6244 | -51.82 | 415   | -   | 425  | 0 --- | R.ALWTGALTPGR.D              |
| 1175.5778                                                                                                                                                                                                                                                                                                                                                                                                                                                                                                                                                                                                                                                                                                                             | 1174.5705 | 1174.6346 | -54.59 | 81    | -   | 91   | 0 --- | R.FPLGPGVTSTTR.G             |
| 1457.7133                                                                                                                                                                                                                                                                                                                                                                                                                                                                                                                                                                                                                                                                                                                             | 1456.7060 | 1456.7773 | -48.93 | 487   | -   | 499  | 0 --- | R.SLLSELSDPVELR.V            |
| 1498.6241                                                                                                                                                                                                                                                                                                                                                                                                                                                                                                                                                                                                                                                                                                                             | 1497.6168 | 1497.6882 | -47.65 | 269   | -   | 283  | 0 --- | R.LSALAAGDGSQYTCR.Y          |
| 1513.7238                                                                                                                                                                                                                                                                                                                                                                                                                                                                                                                                                                                                                                                                                                                             | 1512.7165 | 1512.7936 | -51.00 | 357   | -   | 370  | 0 27  | R.VLSPAGPEAQFELR.G           |
| 1513.7238                                                                                                                                                                                                                                                                                                                                                                                                                                                                                                                                                                                                                                                                                                                             | 1512.7165 | 1512.7936 | -50.97 | 357   | -   | 370  | 0 --- | R.VLSPAGPEAQFELR.G           |
| 1647.7585                                                                                                                                                                                                                                                                                                                                                                                                                                                                                                                                                                                                                                                                                                                             | 1646.7512 | 1646.8338 | -50.13 | 431   | -   | 444  | 0 --- | R.CEAEVPDVSFLLLR.A           |
| 1647.7585                                                                                                                                                                                                                                                                                                                                                                                                                                                                                                                                                                                                                                                                                                                             | 1646.7513 | 1646.8338 | -50.11 | 431   | -   | 444  | 0 27  | R.CEAEVPDVSFLLLR.A           |
| 2530.2642                                                                                                                                                                                                                                                                                                                                                                                                                                                                                                                                                                                                                                                                                                                             | 2529.2569 | 2529.3374 | -31.80 | 224   | -   | 247  | 0 --- | K.VLRPGSSASLTCVAPLSGVDFQLR.R |
| No match to: 842.4627, 848.4779, 850.0055, 850.4871, 853.4691, 864.5048, 865.9789, 868.4995, 870.5005, 876.9857, 882.5121, 882.5121, 892.9567, 927.4397, 951.5660, 982.5261, 996.5410, 1017.6141, 1017.6141, 1019.6234, 1033.6417, 1045.5149, 1051.6498, 1051.6498, 1065.5970, 1131.6476, 1133.6560, 1136.6389, 1147.6736, 1151.6641, 1165.6772, 1165.6773, 1194.5631, 1300.7844, 1302.7943, 1316.8119, 1334.8163, 1334.8163, 1351.5889, 1414.8141, 1434.8339, 1448.8483, 1448.8483, 1475.6820, 1479.7203, 1479.7203, 1557.7402, 1567.6654, 1567.6654, 1583.9542, 1615.7332, 1617.9894, 1617.9894, 1630.7391, 1633.7523, 1697.8313, 1724.7576, 1732.0159, 1901.1652, 2015.1964, 2044.9374, 2184.3481, 2211.0227, 2283.0957, 2305.0806 |           |           |        |       |     |      |       |                              |

8. [A0A4W2EKQ3](#) Mass: 63006 Score: 93 Expect: 7.1e-005 Matches: 12

Alpha-1-B glycoprotein OS=Bos indicus x Bos taurus OX=30522 GN=AlBG PE=4 SV=1

| Observed                                                                                                                                                                                                                                                                                                                                                                                                                                                                                                                                                                                                                                                                                                                              | Mr(expt)  | Mr(calc)  | ppm    | Start | End | Miss | Ions  | Peptide                      |
|---------------------------------------------------------------------------------------------------------------------------------------------------------------------------------------------------------------------------------------------------------------------------------------------------------------------------------------------------------------------------------------------------------------------------------------------------------------------------------------------------------------------------------------------------------------------------------------------------------------------------------------------------------------------------------------------------------------------------------------|-----------|-----------|--------|-------|-----|------|-------|------------------------------|
| 805.4537                                                                                                                                                                                                                                                                                                                                                                                                                                                                                                                                                                                                                                                                                                                              | 804.4464  | 804.4858  | -48.92 | 148   | -   | 154  | 0 --- | R.GVTFLLR.L                  |
| 919.4136                                                                                                                                                                                                                                                                                                                                                                                                                                                                                                                                                                                                                                                                                                                              | 918.4063  | 918.4559  | -53.98 | 288   | -   | 295  | 0 --- | R.SELAAWSR.D                 |
| 1142.5725                                                                                                                                                                                                                                                                                                                                                                                                                                                                                                                                                                                                                                                                                                                             | 1141.5652 | 1141.6244 | -51.83 | 415   | -   | 425  | 0 --- | R.ALWTGALTPGR.D              |
| 1142.5725                                                                                                                                                                                                                                                                                                                                                                                                                                                                                                                                                                                                                                                                                                                             | 1141.5652 | 1141.6244 | -51.82 | 415   | -   | 425  | 0 --- | R.ALWTGALTPGR.D              |
| 1175.5778                                                                                                                                                                                                                                                                                                                                                                                                                                                                                                                                                                                                                                                                                                                             | 1174.5705 | 1174.6346 | -54.59 | 81    | -   | 91   | 0 --- | R.FPLGPGVTSTTR.G             |
| 1457.7133                                                                                                                                                                                                                                                                                                                                                                                                                                                                                                                                                                                                                                                                                                                             | 1456.7060 | 1456.7773 | -48.93 | 487   | -   | 499  | 0 --- | R.SLLSELSDPVELR.V            |
| 1498.6241                                                                                                                                                                                                                                                                                                                                                                                                                                                                                                                                                                                                                                                                                                                             | 1497.6168 | 1497.6882 | -47.65 | 269   | -   | 283  | 0 --- | R.LSALAAGDGSQYTCR.Y          |
| 1513.7238                                                                                                                                                                                                                                                                                                                                                                                                                                                                                                                                                                                                                                                                                                                             | 1512.7165 | 1512.7936 | -51.00 | 357   | -   | 370  | 0 27  | R.VLSPAGPEAQFELR.G           |
| 1513.7238                                                                                                                                                                                                                                                                                                                                                                                                                                                                                                                                                                                                                                                                                                                             | 1512.7165 | 1512.7936 | -50.97 | 357   | -   | 370  | 0 --- | R.VLSPAGPEAQFELR.G           |
| 1647.7585                                                                                                                                                                                                                                                                                                                                                                                                                                                                                                                                                                                                                                                                                                                             | 1646.7512 | 1646.8338 | -50.13 | 431   | -   | 444  | 0 --- | R.CEAEVPDVSFLLLR.A           |
| 1647.7585                                                                                                                                                                                                                                                                                                                                                                                                                                                                                                                                                                                                                                                                                                                             | 1646.7513 | 1646.8338 | -50.11 | 431   | -   | 444  | 0 27  | R.CEAEVPDVSFLLLR.A           |
| 2530.2642                                                                                                                                                                                                                                                                                                                                                                                                                                                                                                                                                                                                                                                                                                                             | 2529.2569 | 2529.3374 | -31.80 | 224   | -   | 247  | 0 --- | K.VLRPGSSASLTCVAPLSGVDFQLR.R |
| No match to: 842.4627, 848.4779, 850.0055, 850.4871, 853.4691, 864.5048, 865.9789, 868.4995, 870.5005, 876.9857, 882.5121, 882.5121, 892.9567, 927.4397, 951.5660, 982.5261, 996.5410, 1017.6141, 1017.6141, 1019.6234, 1033.6417, 1045.5149, 1051.6498, 1051.6498, 1065.5970, 1131.6476, 1133.6560, 1136.6389, 1147.6736, 1151.6641, 1165.6772, 1165.6773, 1194.5631, 1300.7844, 1302.7943, 1316.8119, 1334.8163, 1334.8163, 1351.5889, 1414.8141, 1434.8339, 1448.8483, 1448.8483, 1475.6820, 1479.7203, 1479.7203, 1557.7402, 1567.6654, 1567.6654, 1583.9542, 1615.7332, 1617.9894, 1617.9894, 1630.7391, 1633.7523, 1697.8313, 1724.7576, 1732.0159, 1901.1652, 2015.1964, 2044.9374, 2184.3481, 2211.0227, 2283.0957, 2305.0806 |           |           |        |       |     |      |       |                              |

9. [A0A4W2IGA3](#) Mass: 80257 Score: 50 Expect: 1.4 Matches: 8

Kinesin-like protein OS=Bos indicus x Bos taurus OX=30522 GN=KIF3B PE=3 SV=1

| Observed                                                                                                                                                                                                                                                                                                                                                                                                                                                                                                                                                                                                                                                                                                                                                                                    | Mr(expt)  | Mr(calc)  | ppm    | Start | End | Miss | Ions  | Peptide                           |
|---------------------------------------------------------------------------------------------------------------------------------------------------------------------------------------------------------------------------------------------------------------------------------------------------------------------------------------------------------------------------------------------------------------------------------------------------------------------------------------------------------------------------------------------------------------------------------------------------------------------------------------------------------------------------------------------------------------------------------------------------------------------------------------------|-----------|-----------|--------|-------|-----|------|-------|-----------------------------------|
| 868.4995                                                                                                                                                                                                                                                                                                                                                                                                                                                                                                                                                                                                                                                                                                                                                                                    | 867.4922  | 867.4273  | 74.9   | 48    | -   | 55   | 0 --- | K.GVAHEMPK.T                      |
| 1033.6417                                                                                                                                                                                                                                                                                                                                                                                                                                                                                                                                                                                                                                                                                                                                                                                   | 1032.6344 | 1032.6331 | 1.24   | 540   | -   | 548  | 1 --- | K.LFSKLQAVK.A                     |
| 1045.5149                                                                                                                                                                                                                                                                                                                                                                                                                                                                                                                                                                                                                                                                                                                                                                                   | 1044.5076 | 1044.5312 | -22.57 | 252   | -   | 261  | 1 --- | R.QAKTGAQGER.L                    |
| 1498.6241                                                                                                                                                                                                                                                                                                                                                                                                                                                                                                                                                                                                                                                                                                                                                                                   | 1497.6168 | 1497.6770 | -40.15 | 103   | -   | 115  | 1 --- | K.TYTMGVGRDPEK.R + Oxidation (M)  |
| 1513.7238                                                                                                                                                                                                                                                                                                                                                                                                                                                                                                                                                                                                                                                                                                                                                                                   | 1512.7165 | 1512.7460 | -19.50 | 142   | -   | 153  | 0 9   | R.ASYLEIYQEEIR.D                  |
| 1513.7238                                                                                                                                                                                                                                                                                                                                                                                                                                                                                                                                                                                                                                                                                                                                                                                   | 1512.7165 | 1512.7460 | -19.47 | 142   | -   | 153  | 0 --- | R.ASYLEIYQEEIR.D                  |
| 1647.7585                                                                                                                                                                                                                                                                                                                                                                                                                                                                                                                                                                                                                                                                                                                                                                                   | 1646.7512 | 1646.8007 | -30.06 | 615   | -   | 628  | 0 --- | R.AENIMLLELDMPK.R + Oxidation (M) |
| 1647.7585                                                                                                                                                                                                                                                                                                                                                                                                                                                                                                                                                                                                                                                                                                                                                                                   | 1646.7513 | 1646.8007 | -30.04 | 615   | -   | 628  | 0 27  | R.AENIMLLELDMPK.R + Oxidation (M) |
| No match to: 805.4537, 842.4627, 848.4779, 850.0055, 850.4871, 853.4691, 864.5048, 865.9789, 870.5005, 876.9857, 882.5121, 882.5121, 892.9567, 919.4136, 927.4397, 951.5660, 982.5261, 996.5410, 1017.6141, 1017.6141, 1019.6234, 1051.6498, 1051.6498, 1065.5970, 1131.6476, 1133.6560, 1136.6389, 1142.5725, 1142.5725, 1147.6736, 1151.6641, 1165.6772, 1165.6773, 1175.5778, 1194.5631, 1300.7844, 1302.7943, 1316.8119, 1334.8163, 1334.8163, 1351.5889, 1414.8141, 1434.8339, 1448.8483, 1448.8483, 1475.6820, 1457.7133, 1475.6820, 1479.7203, 1479.7203, 1557.7402, 1567.6654, 1567.6654, 1583.9542, 1615.7332, 1617.9894, 1617.9894, 1630.7391, 1633.7523, 1697.8313, 1724.7576, 1732.0159, 1901.1652, 2015.1964, 2044.9374, 2184.3481, 2211.0227, 2283.0957, 2305.0806, 2530.2642 |           |           |        |       |     |      |       |                                   |

10. [A0A3Q1MG81](#) Mass: 80257 Score: 50 Expect: 1.4 Matches: 8

Kinesin-like protein OS=Bos taurus OX=9913 GN=KIF3B PE=3 SV=1

| Observed  | Mr(expt)  | Mr(calc)  | ppm    | Start | End | Miss | Ions  | Peptide                           |
|-----------|-----------|-----------|--------|-------|-----|------|-------|-----------------------------------|
| 868.4995  | 867.4922  | 867.4273  | 74.9   | 48    | -   | 55   | 0 --- | K.GVAHEMPK.T                      |
| 1033.6417 | 1032.6344 | 1032.6331 | 1.24   | 540   | -   | 548  | 1 --- | K.LFSKLQAVK.A                     |
| 1045.5149 | 1044.5076 | 1044.5312 | -22.57 | 252   | -   | 261  | 1 --- | R.QAKTGAQGER.L                    |
| 1498.6241 | 1497.6168 | 1497.6770 | -40.15 | 103   | -   | 115  | 1 --- | K.TYTMGVGRDPEK.R + Oxidation (M)  |
| 1513.7238 | 1512.7165 | 1512.7460 | -19.50 | 142   | -   | 153  | 0 9   | R.ASYLEIYQEEIR.D                  |
| 1513.7238 | 1512.7165 | 1512.7460 | -19.47 | 142   | -   | 153  | 0 --- | R.ASYLEIYQEEIR.D                  |
| 1647.7585 | 1646.7512 | 1646.8007 | -30.06 | 615   | -   | 628  | 0 --- | R.AENIMLLELDMPK.R + Oxidation (M) |
| 1647.7585 | 1646.7513 | 1646.8007 | -30.04 | 615   | -   | 628  | 0 27  | R.AENIMLLELDMPK.R + Oxidation (M) |

No match to: 805.4537, 842.4627, 848.4779, 850.0055, 850.4871, 853.4691, 864.5048, 865.9789, 870.5005, 876.9857, 882.5121, 882.5121, 892.9567, 919.4136, 927.4397, 951.5660, 982.5261, 996.5410, 1017.6141, 1017.6141, 1019.6234, 1051.6498, 1051.6498, 1065.5970, 1131.6476, 1133.6560, 1136.6389, 1142.5725, 1142.5725, 1147.6736, 1151.6641, 1165.6772, 1165.6773, 1175.5778, 1194.5631, 1300.7844, 1302.7943, 1316.8119, 1334.8163, 1334.8163, 1351.5889, 1414.8141, 1434.8339, 1448.8483, 1448.8483, 1457.7133, 1475.6820, 1479.7203, 1479.7203, 1557.7402, 1567.6654, 1567.6654, 1583.9542, 1615.7332, 1617.9894, 1617.9894, 1630.7391, 1633.7523, 1697.8313, 1724.7576, 1732.0159, 1901.1652, 2015.1964, 2044.9374, 2184.3481, 2211.0227, 2283.0957, 2305.0806, 2530.2642

11. [A0A4W2H2X1](#) Mass: 84971 Score: 49 Expect: 1.7 Matches: 8

Kinesin-like protein OS=Bos indicus x Bos taurus OX=30522 GN=KIF3B PE=3 SV=1

| Observed  | Mr(expt)  | Mr(calc)  | ppm    | Start | End | Miss | Ions | Peptide                            |
|-----------|-----------|-----------|--------|-------|-----|------|------|------------------------------------|
| 868.4995  | 867.4922  | 867.4273  | 74.9   | 48    | 55  | 0    | ---  | K.GVAHEMPK.T                       |
| 1033.6417 | 1032.6344 | 1032.6331 | 1.24   | 540   | 548 | 1    | ---  | K.LFSKQLQAVK.A                     |
| 1045.5149 | 1044.5076 | 1044.5312 | -22.57 | 252   | 261 | 1    | ---  | R.QAKTGAQGER.L                     |
| 1498.6241 | 1497.6168 | 1497.6770 | -40.15 | 103   | 115 | 1    | ---  | K.TYTMGVGRGDPEK.R + Oxidation (M)  |
| 1513.7238 | 1512.7165 | 1512.7460 | -19.50 | 142   | 153 | 0    | 9    | R.ASYLEIYQEEIR.D                   |
| 1513.7238 | 1512.7165 | 1512.7460 | -19.47 | 142   | 153 | 0    | ---  | R.ASYLEIYQEEIR.D                   |
| 1647.7585 | 1646.7512 | 1646.8007 | -30.06 | 653   | 666 | 0    | ---  | R.AENIMLLELDMPSR.T + Oxidation (M) |
| 1647.7585 | 1646.7513 | 1646.8007 | -30.04 | 653   | 666 | 0    | 27   | R.AENIMLLELDMPSR.T + Oxidation (M) |

No match to: 805.4537, 842.4627, 848.4779, 850.0055, 850.4871, 853.4691, 864.5048, 865.9789, 870.5005, 876.9857, 882.5121, 882.5121, 892.9567, 919.4136, 927.4397, 951.5660, 982.5261, 996.5410, 1017.6141, 1017.6141, 1019.6234, 1051.6498, 1051.6498, 1065.5970, 1131.6476, 1133.6560, 1136.6389, 1142.5725, 1142.5725, 1147.6736, 1151.6641, 1165.6772, 1165.6773, 1175.5778, 1194.5631, 1300.7844, 1302.7943, 1316.8119, 1334.8163, 1334.8163, 1351.5889, 1414.8141, 1434.8339, 1448.8483, 1448.8483, 1457.7133, 1475.6820, 1479.7203, 1479.7203, 1557.7402, 1567.6654, 1567.6654, 1583.9542, 1615.7332, 1617.9894, 1617.9894, 1630.7391, 1633.7523, 1697.8313, 1724.7576, 1732.0159, 1901.1652, 2015.1964, 2044.9374, 2184.3481, 2211.0227, 2283.0957, 2305.0806, 2530.2642

12. [F1N020](#) Mass: 84971 Score: 49 Expect: 1.7 Matches: 8

Kinesin-like protein OS=Bos taurus OX=9913 GN=KIF3B PE=3 SV=2

| Observed  | Mr(expt)  | Mr(calc)  | ppm    | Start | End | Miss | Ions | Peptide                            |
|-----------|-----------|-----------|--------|-------|-----|------|------|------------------------------------|
| 868.4995  | 867.4922  | 867.4273  | 74.9   | 48    | 55  | 0    | ---  | K.GVAHEMPK.T                       |
| 1033.6417 | 1032.6344 | 1032.6331 | 1.24   | 540   | 548 | 1    | ---  | K.LFSKQLQAVK.A                     |
| 1045.5149 | 1044.5076 | 1044.5312 | -22.57 | 252   | 261 | 1    | ---  | R.QAKTGAQGER.L                     |
| 1498.6241 | 1497.6168 | 1497.6770 | -40.15 | 103   | 115 | 1    | ---  | K.TYTMGVGRGDPEK.R + Oxidation (M)  |
| 1513.7238 | 1512.7165 | 1512.7460 | -19.50 | 142   | 153 | 0    | 9    | R.ASYLEIYQEEIR.D                   |
| 1513.7238 | 1512.7165 | 1512.7460 | -19.47 | 142   | 153 | 0    | ---  | R.ASYLEIYQEEIR.D                   |
| 1647.7585 | 1646.7512 | 1646.8007 | -30.06 | 653   | 666 | 0    | ---  | R.AENIMLLELDMPSR.T + Oxidation (M) |
| 1647.7585 | 1646.7513 | 1646.8007 | -30.04 | 653   | 666 | 0    | 27   | R.AENIMLLELDMPSR.T + Oxidation (M) |

No match to: 805.4537, 842.4627, 848.4779, 850.0055, 850.4871, 853.4691, 864.5048, 865.9789, 870.5005, 876.9857, 882.5121, 882.5121, 892.9567, 919.4136, 927.4397, 951.5660, 982.5261, 996.5410, 1017.6141, 1017.6141, 1019.6234, 1051.6498, 1051.6498, 1065.5970, 1131.6476, 1133.6560, 1136.6389, 1142.5725, 1142.5725, 1147.6736, 1151.6641, 1165.6772, 1165.6773, 1175.5778, 1194.5631, 1300.7844, 1302.7943, 1316.8119, 1334.8163, 1334.8163, 1351.5889, 1414.8141, 1434.8339, 1448.8483, 1448.8483, 1457.7133, 1475.6820, 1479.7203, 1479.7203, 1557.7402, 1567.6654, 1567.6654, 1583.9542, 1615.7332, 1617.9894, 1617.9894, 1630.7391, 1633.7523, 1697.8313, 1724.7576, 1732.0159, 1901.1652, 2015.1964, 2044.9374, 2184.3481, 2211.0227, 2283.0957, 2305.0806, 2530.2642

13. [A0A4W2F5Q7](#) Mass: 26142 Score: 41 Expect: 10 Matches: 7

Peroxiredoxin like 2A OS=Bos indicus x Bos taurus OX=30522 GN=PRXL2A PE=4 SV=1

| Observed  | Mr(expt)  | Mr(calc)  | ppm    | Start | End | Miss | Ions | Peptide                          |
|-----------|-----------|-----------|--------|-------|-----|------|------|----------------------------------|
| 996.5410  | 995.5337  | 995.5400  | -6.27  | 119   | 126 | 1    | ---  | K.EHIKNVEK.D                     |
| 1065.5970 | 1064.5897 | 1064.5008 | 83.5   | 86    | 93  | 0    | ---  | R.RPGCFCLCR.E                    |
| 1151.6641 | 1150.6568 | 1150.6234 | 29.1   | 60    | 69  | 1    | ---  | K.TLEKDAVTFK.A                   |
| 1194.5631 | 1193.5558 | 1193.5396 | 13.6   | 151   | 159 | 1    | ---  | R.KMMFMGFVLR.L + 3 Oxidation (M) |
| 1300.7844 | 1299.7771 | 1299.7510 | 20.1   | 211   | 222 | 1    | ---  | K.VNLTSVLEAARK.I                 |
| 1414.8141 | 1413.8068 | 1413.6929 | 80.6   | 123   | 133 | 1    | ---  | K.NEVKDFQPFYK.G                  |
| 1557.7402 | 1556.7329 | 1556.8497 | -75.00 | 72    | 85  | 1    | ---  | K.ALWENKNGAVIMAVR.R              |

No match to: 805.4537, 842.4627, 848.4779, 850.0055, 850.4871, 853.4691, 864.5048, 865.9789, 868.4995, 870.5005, 876.9857, 882.5121, 882.5121, 892.9567, 919.4136, 927.4397, 951.5660, 982.5261, 1017.6141, 1017.6141, 1019.6234, 1033.6417, 1045.5149, 1051.6498, 1051.6498, 1131.6476, 1133.6560, 1136.6389, 1142.5725, 1142.5725, 1147.6736, 1165.6772, 1165.6773, 1175.5778, 1302.7943, 1316.8119, 1334.8163, 1334.8163, 1351.5889, 1434.8339, 1448.8483, 1448.8483, 1457.7133, 1475.6820, 1479.7203, 1479.7203, 1498.6241, 1513.7238, 1513.7238, 1567.6654, 1567.6654, 1583.9542, 1615.7332, 1617.9894, 1617.9894, 1630.7391, 1633.7523, 1647.7585, 1647.7585, 1697.8313, 1724.7576, 1732.0159, 1901.1652, 2015.1964, 2044.9374, 2184.3481, 2211.0227, 2283.0957, 2305.0806, 2530.2642

14. [A0A3Q1LNN7](#) Mass: 68022 Score: 41 Expect: 11 Matches: 9

Serum albumin OS=Bos taurus OX=9913 GN=ALB PE=4 SV=1

| Observed  | Mr(expt)  | Mr(calc)  | ppm    | Start | End | Miss | Ions | Peptide              |
|-----------|-----------|-----------|--------|-------|-----|------|------|----------------------|
| 927.4397  | 926.4324  | 926.4861  | -57.97 | 161   | 167 | 0    | ---  | K.YLYEIAR.R          |
| 1017.6141 | 1016.6068 | 1016.5727 | 33.6   | 212   | 220 | 1    | ---  | K.VLTSSARQR.L        |
| 1017.6141 | 1016.6068 | 1016.5727 | 33.6   | 212   | 220 | 1    | ---  | K.VLTSSARQR.L        |
| 1479.7203 | 1478.7130 | 1478.7881 | -50.80 | 421   | 433 | 0    | ---  | K.LGEYGFQNALIVR.Y    |
| 1479.7203 | 1478.7131 | 1478.7881 | -50.77 | 421   | 433 | 0    | ---  | K.LGEYGFQNALIVR.Y    |
| 1567.6654 | 1566.6581 | 1566.7354 | -49.35 | 347   | 359 | 0    | ---  | K.DAFLGSLFYEYSR.R    |
| 1567.6654 | 1566.6581 | 1566.7354 | -49.34 | 347   | 359 | 0    | 22   | K.DAFLGSLFYEYSR.R    |
| 1724.7576 | 1723.7503 | 1723.8273 | -44.65 | 469   | 482 | 0    | ---  | R.MPCTEDYLSLILNR.L   |
| 2044.9374 | 2043.9301 | 2044.0206 | -44.28 | 168   | 183 | 1    | ---  | R.RHPFYAPPELLYYANK.Y |

No match to: 805.4537, 842.4627, 848.4779, 850.0055, 850.4871, 853.4691, 864.5048, 865.9789, 868.4995, 870.5005, 876.9857, 882.5121, 882.5121, 892.9567, 919.4136, 927.4397, 951.5660, 982.5261, 996.5410, 1019.6234, 1033.6417, 1045.5149, 1051.6498, 1051.6498, 1065.5970, 1131.6476, 1133.6560, 1136.6389, 1142.5725, 1142.5725, 1147.6736, 1151.6641, 1165.6772, 1165.6773, 1175.5778, 1194.5631, 1300.7844, 1302.7943, 1316.8119, 1334.8163, 1334.8163, 1351.5889, 1414.8141, 1434.8339, 1448.8483, 1448.8483, 1457.7133, 1475.6820, 1498.6241, 1513.7238, 1513.7238, 1557.7402, 1567.6654, 1583.9542, 1615.7332, 1617.9894, 1617.9894, 1630.7391, 1633.7523, 1647.7585, 1647.7585, 1697.8313, 1732.0159, 1901.1652, 2015.1964, 2184.3481, 2211.0227, 2283.0957, 2305.0806, 2530.2642

15. [A0A452DI98](#) Mass: 15508 Score: 41 Expect: 12 Matches: 8

U6 snRNA-associated Sm-like protein LSm4 OS=Bos taurus OX=9913 GN=LSM4 PE=3 SV=1

| Observed  | Mr(expt)  | Mr(calc)  | ppm    | Start | End | Miss | Ions | Peptide                           |
|-----------|-----------|-----------|--------|-------|-----|------|------|-----------------------------------|
| 805.4537  | 804.4464  | 804.4355  | 13.6   | 110   | 117 | 1    | ---  | R.GVFGGRGR.G                      |
| 864.5048  | 863.4975  | 863.4171  | 93.1   | 42    | 48  | 0    | ---  | R.EVICTSR.D                       |
| 927.4397  | 926.4324  | 926.5046  | -77.93 | 116   | 125 | 1    | ---  | R.GRGGIPGTGR.G                    |
| 996.5410  | 995.5337  | 995.5512  | -17.56 | 126   | 134 | 1    | ---  | R.GQPEKKPGR.Q                     |
| 1142.5725 | 1141.5652 | 1141.6204 | -48.30 | 91    | 100 | 1    | ---  | R.GGLQQKQKQK.G                    |
| 1142.5725 | 1141.5652 | 1141.6204 | -48.29 | 91    | 100 | 1    | ---  | R.GGLQQKQKQK.G                    |
| 1194.5631 | 1193.5558 | 1193.5724 | -13.89 | 103   | 115 | 1    | ---  | R.GMGGAGRGVFGGR.G + Oxidation (M) |
| 1457.7133 | 1456.7060 | 1456.6744 | 21.7   | 53    | 62  | 1    | ---  | K.FWRMPECYIR.G                    |

No match to: 842.4627, 848.4779, 850.0055, 850.4871, 853.4691, 865.9789, 868.4995, 870.5005, 876.9857, 882.5121, 882.5121, 892.9567, 919.4136, 951.5660, 982.5261, 1017.6141, 1017.6141, 1019.6234, 1033.6417, 1045.5149, 1051.6498, 1051.6498, 1065.5970, 1131.6476, 1133.6560, 1136.6389, 1147.6736, 1151.6641, 1165.6772, 1165.6773, 1175.5778, 1300.7844, 1302.7943, 1316.8119, 1334.8163, 1334.8163, 1351.5889, 1414.8141, 1434.8339, 1448.8483, 1448.8483, 1475.6820, 1479.7203, 1479.7203, 1498.6241, 1513.7238, 1513.7238, 1557.7402, 1567.6654, 1567.6654, 1583.9542, 1615.7332, 1617.9894, 1617.9894, 1630.7391, 1633.7523, 1647.7585, 1647.7585, 1697.8313, 1724.7576, 1732.0159, 1901.1652, 2015.1964, 2044.9374, 2184.3481, 2211.0227, 2283.0957, 2305.0806, 2530.2642

16. [A0A4W2FGN9](#) Mass: 123016 Score: 40 Expect: 12 Matches: 19

Coiled-coil domain containing 150 OS=Bos indicus x Bos taurus OX=30522 GN=CCDC150 PE=4 SV=1

| Observed  | Mr (expt) | Mr (calc) | ppm    | Start | End  | Miss | Ions | Peptide                                |
|-----------|-----------|-----------|--------|-------|------|------|------|----------------------------------------|
| 805.4537  | 804.4464  | 804.4341  | 15.3   | 548   | 554  | 1    | ---  | K.ITDSKNK.L                            |
| 848.4779  | 847.4706  | 847.4664  | 4.95   | 642   | 648  | 1    | ---  | K.KVGNFQR.Q                            |
| 864.5048  | 863.4975  | 863.4422  | 64.0   | 826   | 832  | 1    | ---  | R.EVTEMKK.A                            |
| 868.4995  | 867.4922  | 867.4450  | 54.4   | 766   | 772  | 0    | ---  | K.LDHVQEK.L                            |
| 919.4136  | 918.4063  | 918.4043  | 2.24   | 1010  | 1016 | 1    | ---  | R.EEDQDKR.H                            |
| 927.4397  | 926.4324  | 926.4094  | 24.9   | 941   | 948  | 0    | ---  | R.SQYDTSAR.N                           |
| 1147.6736 | 1146.6663 | 1146.6067 | 52.0   | 893   | 901  | 1    | ---  | R.MKQIETELR.Q                          |
| 1300.7844 | 1299.7771 | 1299.7510 | 20.1   | 441   | 451  | 1    | ---  | K.ELLESTIARLR.G                        |
| 1448.8483 | 1447.8410 | 1447.7453 | 66.1   | 30    | 41   | 1    | ---  | R.MRIVEEQTSSLR.D                       |
| 1448.8483 | 1447.8410 | 1447.7453 | 66.1   | 30    | 41   | 1    | ---  | R.MRIVEEQTSSLR.D                       |
| 1475.6820 | 1474.6747 | 1474.6535 | 14.4   | 163   | 174  | 1    | ---  | K.EEEDKAQDEVQR.L                       |
| 1479.7203 | 1478.7130 | 1478.7551 | -28.48 | 985   | 996  | 1    | ---  | K.CRFDGLQLELTK.N                       |
| 1479.7203 | 1478.7131 | 1478.7551 | -28.46 | 985   | 996  | 1    | ---  | K.CRFDGLQLELTK.N                       |
| 1498.6241 | 1497.6168 | 1497.6639 | -31.43 | 90    | 100  | 1    | ---  | K.NCEFLVNRMC.R                         |
| 1557.7402 | 1556.7329 | 1556.8232 | -58.00 | 660   | 673  | 0    | ---  | K.VTIMLENVLASHSK.M + Oxidation (M)     |
| 1630.7391 | 1629.7318 | 1629.8759 | -88.43 | 895   | 907  | 1    | ---  | K.QIETELRQELIK.D                       |
| 2184.3481 | 2183.3408 | 2183.1368 | 93.4   | 747   | 765  | 1    | ---  | R.KLAMSLQALQTNHLQTK.L + Oxidation (M)  |
| 2211.0227 | 2210.0154 | 2210.0498 | -15.54 | 964   | 981  | 1    | ---  | R.QELENRCQITANLEEAHR.W                 |
| 2283.0957 | 2282.0884 | 2282.1324 | -19.29 | 359   | 377  | 1    | ---  | K.MENTRIADHQAILQEEQK.M + Oxidation (M) |

No match to: 842.4627, 850.0055, 850.4871, 853.4691, 865.9789, 870.5005, 876.9857, 882.5121, 882.5121, 892.9567, 951.5660, 982.5261, 996.5410, 1017.6141, 1017.6141, 1019.6234, 1033.6417, 1045.5149, 1051.6498, 1051.6498, 1065.5970, 1131.6476, 1133.6560, 1136.6389, 1142.5725, 1142.5725, 1151.6641, 1165.6772, 1165.6773, 1175.5778, 1194.5631, 1302.7943, 1316.8119, 1334.8163, 1334.8163, 1351.5889, 1414.8141, 1434.8339, 1457.7133, 1513.7238, 1513.7238, 1567.6654, 1567.6654, 1583.9542, 1615.7332, 1617.9894, 1617.9894, 1633.7523, 1647.7585, 1647.7585, 1697.8313, 1724.7576, 1732.0159, 1901.1652, 2015.1964, 2044.9374, 2305.0806, 2530.2642

17. [A0A4W2I014](#) Mass: 105104 Score: 40 Expect: 12 Matches: 16

Protein phosphatase 1 regulatory subunit 21 OS=Bos indicus x Bos taurus OX=30522 GN=PPP1R21 PE=4 SV=1

| Observed  | Mr (expt) | Mr (calc) | ppm    | Start | End | Miss | Ions | Peptide                             |
|-----------|-----------|-----------|--------|-------|-----|------|------|-------------------------------------|
| 842.4627  | 841.4554  | 841.4480  | 8.84   | 49    | 56  | 0    | ---  | K.MAPLAPSR.G                        |
| 853.4691  | 852.4618  | 852.4453  | 19.3   | 286   | 292 | 0    | ---  | K.HVEAELR.S                         |
| 1033.6417 | 1032.6344 | 1032.5451 | 86.5   | 334   | 342 | 1    | ---  | K.SQTLEKAK.E                        |
| 1131.6476 | 1130.6403 | 1130.5931 | 41.7   | 910   | 918 | 1    | ---  | K.QREEIDTLK.M                       |
| 1147.6736 | 1146.6663 | 1146.6357 | 26.7   | 700   | 709 | 1    | ---  | R.RVLLSSTESR.E                      |
| 1165.6772 | 1164.6699 | 1164.5696 | 86.2   | 860   | 869 | 1    | ---  | K.SKEALTEEMK.V                      |
| 1165.6773 | 1164.6700 | 1164.5696 | 86.2   | 860   | 869 | 1    | ---  | K.SKEALTEEMK.V                      |
| 1457.7133 | 1456.7060 | 1456.7522 | -31.66 | 710   | 722 | 0    | ---  | R.EGLAQVQVQSLEK.I                   |
| 1567.6654 | 1566.6581 | 1566.7613 | -65.84 | 840   | 852 | 1    | ---  | K.SVHFYACRALS.K.R                   |
| 1567.6654 | 1566.6581 | 1566.7613 | -65.83 | 840   | 852 | 1    | ---  | K.SVHFYACRALS.K.R                   |
| 1617.9894 | 1616.9821 | 1616.8734 | 67.3   | 755   | 770 | 1    | ---  | K.LKSTSSGQVVGVAQEK.A                |
| 1617.9894 | 1616.9821 | 1616.8734 | 67.3   | 755   | 770 | 1    | ---  | K.LKSTSSGQVVGVAQEK.A                |
| 1633.7523 | 1632.7450 | 1632.8592 | -69.94 | 42    | 56  | 1    | ---  | R.HLGPCVKMAPLAPSR.G                 |
| 1697.8313 | 1696.8240 | 1696.8090 | 8.86   | 148   | 163 | 1    | ---  | R.AGEAMASAEQGGYQK.L + Oxidation (M) |
| 2015.1964 | 2014.1891 | 2014.0346 | 76.7   | 490   | 505 | 1    | ---  | K.LKTFSEHLTSYICFLR.K                |
| 2184.3481 | 2183.3408 | 2183.2201 | 55.3   | 549   | 568 | 0    | ---  | K.LQTYTALLALPSTPDGLLR.T             |

No match to: 805.4537, 848.4779, 850.0055, 850.4871, 864.5048, 865.9789, 868.4995, 870.5005, 876.9857, 882.5121, 882.5121, 892.9567, 919.4136, 927.4397, 951.5660, 982.5261, 996.5410, 1017.6141, 1019.6234, 1045.5149, 1051.6498, 1051.6498, 1065.5970, 1133.6560, 1136.6389, 1142.5725, 1142.5725, 1151.6641, 1175.5778, 1194.5631, 1300.7844, 1302.7943, 1316.8119, 1334.8163, 1334.8163, 1351.5889, 1414.8141, 1434.8339, 1448.8483, 1448.8483, 1475.6820, 1479.7203, 1479.7203, 1498.6241, 1513.7238, 1513.7238, 1557.7402, 1583.9542, 1615.7332, 1630.7391, 1647.7585, 1647.7585, 1724.7576, 1732.0159, 1901.1652, 2044.9374, 2211.0227, 2283.0957, 2305.0806, 2530.2642

18. [A0A4W2CGR1](#) Mass: 105032 Score: 40 Expect: 12 Matches: 16

Protein phosphatase 1 regulatory subunit 21 OS=Bos indicus x Bos taurus OX=30522 GN=PPP1R21 PE=4 SV=1

| Observed  | Mr (expt) | Mr (calc) | ppm    | Start | End | Miss | Ions | Peptide                             |
|-----------|-----------|-----------|--------|-------|-----|------|------|-------------------------------------|
| 842.4627  | 841.4554  | 841.4480  | 8.84   | 49    | 56  | 0    | ---  | K.MAPLAPSR.G                        |
| 853.4691  | 852.4618  | 852.4453  | 19.3   | 286   | 292 | 0    | ---  | K.HVEAELR.S                         |
| 1033.6417 | 1032.6344 | 1032.5451 | 86.5   | 334   | 342 | 1    | ---  | K.SQTLEKAK.E                        |
| 1131.6476 | 1130.6403 | 1130.5931 | 41.7   | 910   | 918 | 1    | ---  | K.QREEIDTLK.M                       |
| 1147.6736 | 1146.6663 | 1146.6357 | 26.7   | 700   | 709 | 1    | ---  | R.RVLLSSTESR.E                      |
| 1165.6772 | 1164.6699 | 1164.5696 | 86.2   | 860   | 869 | 1    | ---  | K.SKEALTEEMK.V                      |
| 1165.6773 | 1164.6700 | 1164.5696 | 86.2   | 860   | 869 | 1    | ---  | K.SKEALTEEMK.V                      |
| 1457.7133 | 1456.7060 | 1456.7522 | -31.66 | 710   | 722 | 0    | ---  | R.EGLAQVQVQSLEK.I                   |
| 1567.6654 | 1566.6581 | 1566.7613 | -65.84 | 840   | 852 | 1    | ---  | K.SVHFYACRALS.K.R                   |
| 1567.6654 | 1566.6581 | 1566.7613 | -65.83 | 840   | 852 | 1    | ---  | K.SVHFYACRALS.K.R                   |
| 1617.9894 | 1616.9821 | 1616.8734 | 67.3   | 755   | 770 | 1    | ---  | K.LKSTSSGQVVGVAQEK.A                |
| 1617.9894 | 1616.9821 | 1616.8734 | 67.3   | 755   | 770 | 1    | ---  | K.LKSTSSGQVVGVAQEK.A                |
| 1633.7523 | 1632.7450 | 1632.8592 | -69.94 | 42    | 56  | 1    | ---  | R.HLGPCVKMAPLAPSR.G                 |
| 1697.8313 | 1696.8240 | 1696.8090 | 8.86   | 148   | 163 | 1    | ---  | R.AGEAMASAEQGGYQK.L + Oxidation (M) |
| 2015.1964 | 2014.1891 | 2014.0346 | 76.7   | 490   | 505 | 1    | ---  | K.LKTFSEHLTSYICFLR.K                |
| 2184.3481 | 2183.3408 | 2183.2201 | 55.3   | 549   | 568 | 0    | ---  | K.LQTYTALLALPSTPDGLLR.T             |

No match to: 805.4537, 848.4779, 850.0055, 850.4871, 864.5048, 865.9789, 868.4995, 870.5005, 876.9857, 882.5121, 882.5121, 892.9567, 919.4136, 927.4397, 951.5660, 982.5261, 996.5410, 1017.6141, 1019.6234, 1045.5149, 1051.6498, 1051.6498, 1065.5970, 1133.6560, 1136.6389, 1142.5725, 1142.5725, 1151.6641, 1175.5778, 1194.5631, 1300.7844, 1302.7943, 1316.8119, 1334.8163, 1334.8163, 1351.5889, 1414.8141, 1434.8339, 1448.8483, 1448.8483, 1475.6820, 1479.7203, 1479.7203, 1498.6241, 1513.7238, 1513.7238, 1557.7402, 1583.9542, 1615.7332, 1630.7391, 1647.7585, 1647.7585, 1724.7576, 1732.0159, 1901.1652, 2044.9374, 2211.0227, 2283.0957, 2305.0806, 2530.2642

19. [A0A4W2DDL5](#) Mass: 70207 Score: 40 Expect: 13 Matches: 9

Albumin OS=Bos indicus x Bos taurus OX=30522 GN=ALB PE=4 SV=1

| Observed  | Mr (expt) | Mr (calc) | ppm    | Start | End | Miss | Ions | Peptide       |
|-----------|-----------|-----------|--------|-------|-----|------|------|---------------|
| 927.4397  | 926.4324  | 926.4861  | -57.97 | 152   | 158 | 0    | ---  | K.YLYEIAR.R   |
| 1017.6141 | 1016.6068 | 1016.5727 | 33.6   | 203   | 211 | 1    | ---  | K.VLTSSARQR.L |



|                                                                                                                                                                                                                                                                                                                                                                                                                                                                                                                                                                                                                                                                                                                                                                       |           |           |        |     |   |     |   |     |                      |
|-----------------------------------------------------------------------------------------------------------------------------------------------------------------------------------------------------------------------------------------------------------------------------------------------------------------------------------------------------------------------------------------------------------------------------------------------------------------------------------------------------------------------------------------------------------------------------------------------------------------------------------------------------------------------------------------------------------------------------------------------------------------------|-----------|-----------|--------|-----|---|-----|---|-----|----------------------|
| 1017.6141                                                                                                                                                                                                                                                                                                                                                                                                                                                                                                                                                                                                                                                                                                                                                             | 1016.6068 | 1016.5727 | 33.6   | 203 | - | 211 | 1 | --- | K.VLTSSARQR.L        |
| 1479.7203                                                                                                                                                                                                                                                                                                                                                                                                                                                                                                                                                                                                                                                                                                                                                             | 1478.7130 | 1478.7881 | -50.80 | 412 | - | 424 | 0 | --- | K.LGEYGFQNALIVR.Y    |
| 1479.7203                                                                                                                                                                                                                                                                                                                                                                                                                                                                                                                                                                                                                                                                                                                                                             | 1478.7131 | 1478.7881 | -50.77 | 412 | - | 424 | 0 | --- | K.LGEYGFQNALIVR.Y    |
| 1567.6654                                                                                                                                                                                                                                                                                                                                                                                                                                                                                                                                                                                                                                                                                                                                                             | 1566.6581 | 1566.7354 | -49.35 | 338 | - | 350 | 0 | --- | K.DAFLGSFLYEYSR.R    |
| 1567.6654                                                                                                                                                                                                                                                                                                                                                                                                                                                                                                                                                                                                                                                                                                                                                             | 1566.6581 | 1566.7354 | -49.34 | 338 | - | 350 | 0 | 22  | K.DAFLGSFLYEYSR.R    |
| 1724.7576                                                                                                                                                                                                                                                                                                                                                                                                                                                                                                                                                                                                                                                                                                                                                             | 1723.7503 | 1723.8273 | -44.65 | 460 | - | 473 | 0 | --- | R.MPCTEDYLSLILNR.L   |
| 2044.9374                                                                                                                                                                                                                                                                                                                                                                                                                                                                                                                                                                                                                                                                                                                                                             | 2043.9301 | 2044.0206 | -44.28 | 159 | - | 174 | 1 | --- | R.RHPYFYAPELLYYANK.Y |
| No match to: 805.4537, 842.4627, 848.4779, 850.0055, 850.4871, 853.4691, 864.5048, 865.9789, 868.4995, 870.5005, 876.9857, 882.5121, 882.5121, 892.9567, 919.4136, 951.5660, 982.5261, 996.5410, 1019.6234, 1033.6417, 1045.5149, 1051.6498, 1051.6498, 1065.5970, 1131.6476, 1133.6560, 1136.6389, 1142.5725, 1142.5725, 1147.6736, 1151.6641, 1165.6772, 1165.6773, 1175.5778, 1194.5631, 1300.7844, 1302.7943, 1316.8119, 1334.8163, 1334.8163, 1351.5889, 1414.8141, 1434.8339, 1448.8483, 1448.8483, 1457.7133, 1475.6820, 1498.6241, 1513.7238, 1513.7238, 1557.7402, 1583.9542, 1615.7332, 1617.9894, 1617.9894, 1630.7391, 1633.7523, 1647.7585, 1647.7585, 1697.8313, 1732.0159, 1901.1652, 2015.1964, 2184.3481, 2211.0227, 2283.0957, 2305.0806, 2530.2642 |           |           |        |     |   |     |   |     |                      |

20. [A0A140T897](#) Mass: 71274 Score: 40 Expect: 13 Matches: 9

| Serum albumin OS=Bos taurus OX=9913 GN=ALB PE=4 SV=1                                                                                                                                                                                                                                                                                                                                                                                                                                                                                                                                                                                                                                                                                                                  |           |           |        |       |     |      |      |         |                      |
|-----------------------------------------------------------------------------------------------------------------------------------------------------------------------------------------------------------------------------------------------------------------------------------------------------------------------------------------------------------------------------------------------------------------------------------------------------------------------------------------------------------------------------------------------------------------------------------------------------------------------------------------------------------------------------------------------------------------------------------------------------------------------|-----------|-----------|--------|-------|-----|------|------|---------|----------------------|
| Observed                                                                                                                                                                                                                                                                                                                                                                                                                                                                                                                                                                                                                                                                                                                                                              | Mr(expt)  | Mr(calc)  | ppm    | Start | End | Miss | Ions | Peptide |                      |
| 927.4397                                                                                                                                                                                                                                                                                                                                                                                                                                                                                                                                                                                                                                                                                                                                                              | 926.4324  | 926.4861  | -57.97 | 161   | -   | 167  | 0    | ---     | K.YLYEIAR.R          |
| 1017.6141                                                                                                                                                                                                                                                                                                                                                                                                                                                                                                                                                                                                                                                                                                                                                             | 1016.6068 | 1016.5727 | 33.6   | 212   | -   | 220  | 1    | ---     | K.VLTSSARQR.L        |
| 1017.6141                                                                                                                                                                                                                                                                                                                                                                                                                                                                                                                                                                                                                                                                                                                                                             | 1016.6068 | 1016.5727 | 33.6   | 212   | -   | 220  | 1    | ---     | K.VLTSSARQR.L        |
| 1479.7203                                                                                                                                                                                                                                                                                                                                                                                                                                                                                                                                                                                                                                                                                                                                                             | 1478.7130 | 1478.7881 | -50.80 | 421   | -   | 433  | 0    | ---     | K.LGEYGFQNALIVR.Y    |
| 1479.7203                                                                                                                                                                                                                                                                                                                                                                                                                                                                                                                                                                                                                                                                                                                                                             | 1478.7131 | 1478.7881 | -50.77 | 421   | -   | 433  | 0    | ---     | K.LGEYGFQNALIVR.Y    |
| 1567.6654                                                                                                                                                                                                                                                                                                                                                                                                                                                                                                                                                                                                                                                                                                                                                             | 1566.6581 | 1566.7354 | -49.35 | 347   | -   | 359  | 0    | ---     | K.DAFLGSFLYEYSR.R    |
| 1567.6654                                                                                                                                                                                                                                                                                                                                                                                                                                                                                                                                                                                                                                                                                                                                                             | 1566.6581 | 1566.7354 | -49.34 | 347   | -   | 359  | 0    | 22      | K.DAFLGSFLYEYSR.R    |
| 1724.7576                                                                                                                                                                                                                                                                                                                                                                                                                                                                                                                                                                                                                                                                                                                                                             | 1723.7503 | 1723.8273 | -44.65 | 469   | -   | 482  | 0    | ---     | R.MPCTEDYLSLILNR.L   |
| 2044.9374                                                                                                                                                                                                                                                                                                                                                                                                                                                                                                                                                                                                                                                                                                                                                             | 2043.9301 | 2044.0206 | -44.28 | 168   | -   | 183  | 1    | ---     | R.RHPYFYAPELLYYANK.Y |
| No match to: 805.4537, 842.4627, 848.4779, 850.0055, 850.4871, 853.4691, 864.5048, 865.9789, 868.4995, 870.5005, 876.9857, 882.5121, 882.5121, 892.9567, 919.4136, 951.5660, 982.5261, 996.5410, 1019.6234, 1033.6417, 1045.5149, 1051.6498, 1051.6498, 1065.5970, 1131.6476, 1133.6560, 1136.6389, 1142.5725, 1142.5725, 1147.6736, 1151.6641, 1165.6772, 1165.6773, 1175.5778, 1194.5631, 1300.7844, 1302.7943, 1316.8119, 1334.8163, 1334.8163, 1351.5889, 1414.8141, 1434.8339, 1448.8483, 1448.8483, 1457.7133, 1475.6820, 1498.6241, 1513.7238, 1513.7238, 1557.7402, 1583.9542, 1615.7332, 1617.9894, 1617.9894, 1630.7391, 1633.7523, 1647.7585, 1647.7585, 1697.8313, 1732.0159, 1901.1652, 2015.1964, 2184.3481, 2211.0227, 2283.0957, 2305.0806, 2530.2642 |           |           |        |       |     |      |      |         |                      |

21. [A0A4W2EVR9](#) Mass: 71453 Score: 40 Expect: 13 Matches: 9

| Albumin OS=Bos indicus x Bos taurus OX=30522 GN=ALB PE=4 SV=1                                                                                                                                                                                                                                                                                                                                                                                                                                                                                                                                                                                                                                                                                                         |           |           |        |       |     |      |      |         |                      |
|-----------------------------------------------------------------------------------------------------------------------------------------------------------------------------------------------------------------------------------------------------------------------------------------------------------------------------------------------------------------------------------------------------------------------------------------------------------------------------------------------------------------------------------------------------------------------------------------------------------------------------------------------------------------------------------------------------------------------------------------------------------------------|-----------|-----------|--------|-------|-----|------|------|---------|----------------------|
| Observed                                                                                                                                                                                                                                                                                                                                                                                                                                                                                                                                                                                                                                                                                                                                                              | Mr(expt)  | Mr(calc)  | ppm    | Start | End | Miss | Ions | Peptide |                      |
| 927.4397                                                                                                                                                                                                                                                                                                                                                                                                                                                                                                                                                                                                                                                                                                                                                              | 926.4324  | 926.4861  | -57.97 | 161   | -   | 167  | 0    | ---     | K.YLYEIAR.R          |
| 1017.6141                                                                                                                                                                                                                                                                                                                                                                                                                                                                                                                                                                                                                                                                                                                                                             | 1016.6068 | 1016.5727 | 33.6   | 212   | -   | 220  | 1    | ---     | K.VLTSSARQR.L        |
| 1017.6141                                                                                                                                                                                                                                                                                                                                                                                                                                                                                                                                                                                                                                                                                                                                                             | 1016.6068 | 1016.5727 | 33.6   | 212   | -   | 220  | 1    | ---     | K.VLTSSARQR.L        |
| 1479.7203                                                                                                                                                                                                                                                                                                                                                                                                                                                                                                                                                                                                                                                                                                                                                             | 1478.7130 | 1478.7881 | -50.80 | 421   | -   | 433  | 0    | ---     | K.LGEYGFQNALIVR.Y    |
| 1479.7203                                                                                                                                                                                                                                                                                                                                                                                                                                                                                                                                                                                                                                                                                                                                                             | 1478.7131 | 1478.7881 | -50.77 | 421   | -   | 433  | 0    | ---     | K.LGEYGFQNALIVR.Y    |
| 1567.6654                                                                                                                                                                                                                                                                                                                                                                                                                                                                                                                                                                                                                                                                                                                                                             | 1566.6581 | 1566.7354 | -49.35 | 347   | -   | 359  | 0    | ---     | K.DAFLGSFLYEYSR.R    |
| 1567.6654                                                                                                                                                                                                                                                                                                                                                                                                                                                                                                                                                                                                                                                                                                                                                             | 1566.6581 | 1566.7354 | -49.34 | 347   | -   | 359  | 0    | 22      | K.DAFLGSFLYEYSR.R    |
| 1724.7576                                                                                                                                                                                                                                                                                                                                                                                                                                                                                                                                                                                                                                                                                                                                                             | 1723.7503 | 1723.8273 | -44.65 | 469   | -   | 482  | 0    | ---     | R.MPCTEDYLSLILNR.L   |
| 2044.9374                                                                                                                                                                                                                                                                                                                                                                                                                                                                                                                                                                                                                                                                                                                                                             | 2043.9301 | 2044.0206 | -44.28 | 168   | -   | 183  | 1    | ---     | R.RHPYFYAPELLYYANK.Y |
| No match to: 805.4537, 842.4627, 848.4779, 850.0055, 850.4871, 853.4691, 864.5048, 865.9789, 868.4995, 870.5005, 876.9857, 882.5121, 882.5121, 892.9567, 919.4136, 951.5660, 982.5261, 996.5410, 1019.6234, 1033.6417, 1045.5149, 1051.6498, 1051.6498, 1065.5970, 1131.6476, 1133.6560, 1136.6389, 1142.5725, 1142.5725, 1147.6736, 1151.6641, 1165.6772, 1165.6773, 1175.5778, 1194.5631, 1300.7844, 1302.7943, 1316.8119, 1334.8163, 1334.8163, 1351.5889, 1414.8141, 1434.8339, 1448.8483, 1448.8483, 1457.7133, 1475.6820, 1498.6241, 1513.7238, 1513.7238, 1557.7402, 1583.9542, 1615.7332, 1617.9894, 1617.9894, 1630.7391, 1633.7523, 1647.7585, 1647.7585, 1697.8313, 1732.0159, 1901.1652, 2015.1964, 2184.3481, 2211.0227, 2283.0957, 2305.0806, 2530.2642 |           |           |        |       |     |      |      |         |                      |

22. [A0A4W2DGX3](#) Mass: 13967 Score: 40 Expect: 14 Matches: 8

| U6 snRNA-associated Sm-like protein LSM4 OS=Bos indicus x Bos taurus OX=30522 GN=LSM4 PE=3 SV=1                                                                                                                                                                                                                                                                                                                                                                                                                                                                                                                                                                                                                                                                                     |           |           |        |       |     |      |      |         |                                  |
|-------------------------------------------------------------------------------------------------------------------------------------------------------------------------------------------------------------------------------------------------------------------------------------------------------------------------------------------------------------------------------------------------------------------------------------------------------------------------------------------------------------------------------------------------------------------------------------------------------------------------------------------------------------------------------------------------------------------------------------------------------------------------------------|-----------|-----------|--------|-------|-----|------|------|---------|----------------------------------|
| Observed                                                                                                                                                                                                                                                                                                                                                                                                                                                                                                                                                                                                                                                                                                                                                                            | Mr(expt)  | Mr(calc)  | ppm    | Start | End | Miss | Ions | Peptide |                                  |
| 805.4537                                                                                                                                                                                                                                                                                                                                                                                                                                                                                                                                                                                                                                                                                                                                                                            | 804.4464  | 804.4355  | 13.6   | 96    | -   | 103  | 1    | ---     | R.GVFGGRGR.G                     |
| 864.5048                                                                                                                                                                                                                                                                                                                                                                                                                                                                                                                                                                                                                                                                                                                                                                            | 863.4975  | 863.4171  | 93.1   | 28    | -   | 34   | 0    | ---     | R.EVICTSR.D                      |
| 927.4397                                                                                                                                                                                                                                                                                                                                                                                                                                                                                                                                                                                                                                                                                                                                                                            | 926.4324  | 926.5046  | -77.93 | 102   | -   | 111  | 1    | ---     | R.GRGGIPGTGR.G                   |
| 996.5410                                                                                                                                                                                                                                                                                                                                                                                                                                                                                                                                                                                                                                                                                                                                                                            | 995.5337  | 995.5512  | -17.56 | 112   | -   | 120  | 1    | ---     | R.GQPEKKPGR.Q                    |
| 1142.5725                                                                                                                                                                                                                                                                                                                                                                                                                                                                                                                                                                                                                                                                                                                                                                           | 1141.5652 | 1141.6204 | -48.30 | 77    | -   | 86   | 1    | ---     | R.GGLQQQKQK.G                    |
| 1142.5725                                                                                                                                                                                                                                                                                                                                                                                                                                                                                                                                                                                                                                                                                                                                                                           | 1141.5652 | 1141.6204 | -48.29 | 77    | -   | 86   | 1    | ---     | R.GGLQQQKQK.G                    |
| 1194.5631                                                                                                                                                                                                                                                                                                                                                                                                                                                                                                                                                                                                                                                                                                                                                                           | 1193.5558 | 1193.5724 | -13.89 | 89    | -   | 101  | 1    | ---     | R.GMGAGRGVFGGR.G + Oxidation (M) |
| 1457.7133                                                                                                                                                                                                                                                                                                                                                                                                                                                                                                                                                                                                                                                                                                                                                                           | 1456.7060 | 1456.6744 | 21.7   | 39    | -   | 48   | 1    | ---     | K.FWRMPECYIR.G                   |
| No match to: 842.4627, 848.4779, 850.0055, 850.4871, 853.4691, 865.9789, 868.4995, 870.5005, 876.9857, 882.5121, 882.5121, 892.9567, 919.4136, 951.5660, 982.5261, 1017.6141, 1017.6141, 1019.6234, 1033.6417, 1045.5149, 1051.6498, 1051.6498, 1065.5970, 1131.6476, 1133.6560, 1136.6389, 1147.6736, 1151.6641, 1165.6772, 1165.6773, 1175.5778, 1300.7844, 1302.7943, 1316.8119, 1334.8163, 1334.8163, 1351.5889, 1414.8141, 1434.8339, 1448.8483, 1448.8483, 1475.6820, 1479.7203, 1479.7203, 1498.6241, 1513.7238, 1513.7238, 1557.7402, 1567.6654, 1567.6654, 1583.9542, 1615.7332, 1617.9894, 1617.9894, 1630.7391, 1633.7523, 1647.7585, 1647.7585, 1697.8313, 1724.7576, 1732.0159, 1901.1652, 2015.1964, 2044.9374, 2184.3481, 2211.0227, 2283.0957, 2305.0806, 2530.2642 |           |           |        |       |     |      |      |         |                                  |

23. [A0A4W2HT62](#) Mass: 15511 Score: 39 Expect: 16 Matches: 8

| U6 snRNA-associated Sm-like protein LSM4 OS=Bos indicus x Bos taurus OX=30522 GN=LSM4 PE=3 SV=1                                                                                                                                                                                                                                                                                                                                                                                                                                                                                                                                                                                                                                                                                     |           |           |        |       |     |      |      |         |                                  |
|-------------------------------------------------------------------------------------------------------------------------------------------------------------------------------------------------------------------------------------------------------------------------------------------------------------------------------------------------------------------------------------------------------------------------------------------------------------------------------------------------------------------------------------------------------------------------------------------------------------------------------------------------------------------------------------------------------------------------------------------------------------------------------------|-----------|-----------|--------|-------|-----|------|------|---------|----------------------------------|
| Observed                                                                                                                                                                                                                                                                                                                                                                                                                                                                                                                                                                                                                                                                                                                                                                            | Mr(expt)  | Mr(calc)  | ppm    | Start | End | Miss | Ions | Peptide |                                  |
| 805.4537                                                                                                                                                                                                                                                                                                                                                                                                                                                                                                                                                                                                                                                                                                                                                                            | 804.4464  | 804.4355  | 13.6   | 110   | -   | 117  | 1    | ---     | R.GVFGGRGR.G                     |
| 864.5048                                                                                                                                                                                                                                                                                                                                                                                                                                                                                                                                                                                                                                                                                                                                                                            | 863.4975  | 863.4171  | 93.1   | 42    | -   | 48   | 0    | ---     | R.EVICTSR.D                      |
| 927.4397                                                                                                                                                                                                                                                                                                                                                                                                                                                                                                                                                                                                                                                                                                                                                                            | 926.4324  | 926.5046  | -77.93 | 116   | -   | 125  | 1    | ---     | R.GRGGIPGTGR.G                   |
| 996.5410                                                                                                                                                                                                                                                                                                                                                                                                                                                                                                                                                                                                                                                                                                                                                                            | 995.5337  | 995.5512  | -17.56 | 126   | -   | 134  | 1    | ---     | R.GQPEKKPGR.Q                    |
| 1142.5725                                                                                                                                                                                                                                                                                                                                                                                                                                                                                                                                                                                                                                                                                                                                                                           | 1141.5652 | 1141.6204 | -48.30 | 91    | -   | 100  | 1    | ---     | R.GGLQQQKQK.G                    |
| 1142.5725                                                                                                                                                                                                                                                                                                                                                                                                                                                                                                                                                                                                                                                                                                                                                                           | 1141.5652 | 1141.6204 | -48.29 | 91    | -   | 100  | 1    | ---     | R.GGLQQQKQK.G                    |
| 1194.5631                                                                                                                                                                                                                                                                                                                                                                                                                                                                                                                                                                                                                                                                                                                                                                           | 1193.5558 | 1193.5724 | -13.89 | 103   | -   | 115  | 1    | ---     | R.GMGAGRGVFGGR.G + Oxidation (M) |
| 1457.7133                                                                                                                                                                                                                                                                                                                                                                                                                                                                                                                                                                                                                                                                                                                                                                           | 1456.7060 | 1456.6744 | 21.7   | 53    | -   | 62   | 1    | ---     | K.FWRMPECYIR.G                   |
| No match to: 842.4627, 848.4779, 850.0055, 850.4871, 853.4691, 865.9789, 868.4995, 870.5005, 876.9857, 882.5121, 882.5121, 892.9567, 919.4136, 951.5660, 982.5261, 1017.6141, 1017.6141, 1019.6234, 1033.6417, 1045.5149, 1051.6498, 1051.6498, 1065.5970, 1131.6476, 1133.6560, 1136.6389, 1147.6736, 1151.6641, 1165.6772, 1165.6773, 1175.5778, 1300.7844, 1302.7943, 1316.8119, 1334.8163, 1334.8163, 1351.5889, 1414.8141, 1434.8339, 1448.8483, 1448.8483, 1475.6820, 1479.7203, 1479.7203, 1498.6241, 1513.7238, 1513.7238, 1557.7402, 1567.6654, 1567.6654, 1583.9542, 1615.7332, 1617.9894, 1617.9894, 1630.7391, 1633.7523, 1647.7585, 1647.7585, 1697.8313, 1724.7576, 1732.0159, 1901.1652, 2015.1964, 2044.9374, 2184.3481, 2211.0227, 2283.0957, 2305.0806, 2530.2642 |           |           |        |       |     |      |      |         |                                  |

24. [Q3ZBK6](#) Mass: 15511 Score: 39 Expect: 16 Matches: 8

|                                                                                  |  |  |  |  |  |  |  |  |  |
|----------------------------------------------------------------------------------|--|--|--|--|--|--|--|--|--|
| U6 snRNA-associated Sm-like protein LSM4 OS=Bos taurus OX=9913 GN=LSM4 PE=2 SV=1 |  |  |  |  |  |  |  |  |  |
|----------------------------------------------------------------------------------|--|--|--|--|--|--|--|--|--|

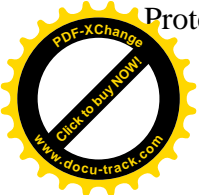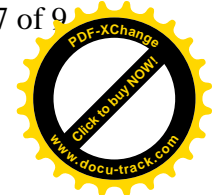

| Observed  | Mr(expt)  | Mr(calc)  | ppm    | Start | End   | Miss | Ions | Peptide                           |
|-----------|-----------|-----------|--------|-------|-------|------|------|-----------------------------------|
| 805.4537  | 804.4464  | 804.4355  | 13.6   | 110   | - 117 | 1    | ---  | R.GVFGGRGR.G                      |
| 864.5048  | 863.4975  | 863.4171  | 93.1   | 42    | - 48  | 0    | ---  | R.EVICTSR.D                       |
| 927.4397  | 926.4324  | 926.5046  | -77.93 | 116   | - 125 | 1    | ---  | R.GRGGIPGTGR.G                    |
| 996.5410  | 995.5337  | 995.5512  | -17.56 | 126   | - 134 | 1    | ---  | R.GQPEKKPGR.Q                     |
| 1142.5725 | 1141.5652 | 1141.6204 | -48.30 | 91    | - 100 | 1    | ---  | R.GGLQQKQKQK.G                    |
| 1142.5725 | 1141.5652 | 1141.6204 | -48.29 | 91    | - 100 | 1    | ---  | R.GGLQQKQKQK.G                    |
| 1194.5631 | 1193.5558 | 1193.5724 | -13.89 | 103   | - 115 | 1    | ---  | R.GMGGAGRGVFGGR.G + Oxidation (M) |
| 1457.7133 | 1456.7060 | 1456.6744 | 21.7   | 53    | - 62  | 1    | ---  | K.FWRMPECYIR.G                    |

**No match to:** 842.4627, 848.4779, 850.0055, 850.4871, 853.4691, 865.9789, 868.4995, 870.5005, 876.9857, 882.5121, 882.5121, 892.9567, 919.4136, 951.5660, 982.5261, 1017.6141, 1017.6141, 1019.6234, 1033.6417, 1045.5149, 1051.6498, 1051.6498, 1065.5970, 1131.6476, 1133.6560, 1136.6389, 1147.6736, 1151.6641, 1165.6772, 1165.6773, 1175.5778, 1300.7844, 1302.7943, 1316.8119, 1334.8163, 1334.8163, 1351.5889, 1414.8141, 1434.8339, 1448.8483, 1448.8483, 1475.6820, 1479.7203, 1479.7203, 1498.6241, 1513.7238, 1513.7238, 1557.7402, 1567.6654, 1567.6654, 1583.9542, 1615.7332, 1617.9894, 1617.9894, 1630.7391, 1633.7523, 1647.7585, 1647.7585, 1697.8313, 1724.7576, 1732.0159, 1901.1652, 2015.1964, 2044.9374, 2184.3481, 2211.0227, 2283.0957, 2305.0806, 2530.2642

25. [A0A4W2EW60](#) Mass: 76020 Score: 39 Expect: 17 Matches: 9

Albumin OS=Bos indicus x Bos taurus OX=30522 GN=ALB PE=4 SV=1

| Observed  | Mr(expt)  | Mr(calc)  | ppm    | Start | End   | Miss | Ions | Peptide               |
|-----------|-----------|-----------|--------|-------|-------|------|------|-----------------------|
| 927.4397  | 926.4324  | 926.4861  | -57.97 | 161   | - 167 | 0    | ---  | K.YLYEIAR.R           |
| 1017.6141 | 1016.6068 | 1016.5727 | 33.6   | 212   | - 220 | 1    | ---  | K.VLTSSARQR.L         |
| 1017.6141 | 1016.6068 | 1016.5727 | 33.6   | 212   | - 220 | 1    | ---  | K.VLTSSARQR.L         |
| 1479.7203 | 1478.7130 | 1478.7881 | -50.80 | 421   | - 433 | 0    | ---  | K.LGEYGFQNALIVR.Y     |
| 1479.7203 | 1478.7131 | 1478.7881 | -50.77 | 421   | - 433 | 0    | ---  | K.LGEYGFQNALIVR.Y     |
| 1567.6654 | 1566.6581 | 1566.7354 | -49.35 | 347   | - 359 | 0    | ---  | K.DAFLGSFLYEYSR.R     |
| 1567.6654 | 1566.6581 | 1566.7354 | -49.34 | 347   | - 359 | 0    | 22   | K.DAFLGSFLYEYSR.R     |
| 1724.7576 | 1723.7503 | 1723.8273 | -44.65 | 469   | - 482 | 0    | ---  | R.MPCTEDYLSLILNR.L    |
| 2044.9374 | 2043.9301 | 2044.0206 | -44.28 | 168   | - 183 | 1    | ---  | R.RHPYFYAPPELLYYANK.Y |

**No match to:** 805.4537, 842.4627, 848.4779, 850.0055, 850.4871, 853.4691, 864.5048, 865.9789, 868.4995, 870.5005, 876.9857, 882.5121, 882.5121, 892.9567, 919.4136, 951.5660, 982.5261, 996.5410, 1019.6234, 1033.6417, 1045.5149, 1051.6498, 1051.6498, 1065.5970, 1131.6476, 1133.6560, 1136.6389, 1142.5725, 1142.5725, 1147.6736, 1151.6641, 1165.6772, 1165.6773, 1175.5778, 1194.5631, 1300.7844, 1302.7943, 1316.8119, 1334.8163, 1334.8163, 1351.5889, 1414.8141, 1434.8339, 1448.8483, 1448.8483, 1457.7133, 1475.6820, 1498.6241, 1513.7238, 1513.7238, 1557.7402, 1583.9542, 1615.7332, 1617.9894, 1617.9894, 1630.7391, 1633.7523, 1647.7585, 1647.7585, 1697.8313, 1732.0159, 1901.1652, 2015.1964, 2184.3481, 2211.0227, 2283.0957, 2305.0806, 2530.2642

26. [A0A4W2D8T3](#) Mass: 76089 Score: 39 Expect: 18 Matches: 9

Albumin OS=Bos indicus x Bos taurus OX=30522 GN=ALB PE=4 SV=1

| Observed  | Mr(expt)  | Mr(calc)  | ppm    | Start | End   | Miss | Ions | Peptide               |
|-----------|-----------|-----------|--------|-------|-------|------|------|-----------------------|
| 927.4397  | 926.4324  | 926.4861  | -57.97 | 209   | - 215 | 0    | ---  | K.YLYEIAR.R           |
| 1017.6141 | 1016.6068 | 1016.5727 | 33.6   | 260   | - 268 | 1    | ---  | K.VLTSSARQR.L         |
| 1017.6141 | 1016.6068 | 1016.5727 | 33.6   | 260   | - 268 | 1    | ---  | K.VLTSSARQR.L         |
| 1479.7203 | 1478.7130 | 1478.7881 | -50.80 | 469   | - 481 | 0    | ---  | K.LGEYGFQNALIVR.Y     |
| 1479.7203 | 1478.7131 | 1478.7881 | -50.77 | 469   | - 481 | 0    | ---  | K.LGEYGFQNALIVR.Y     |
| 1567.6654 | 1566.6581 | 1566.7354 | -49.35 | 395   | - 407 | 0    | ---  | K.DAFLGSFLYEYSR.R     |
| 1567.6654 | 1566.6581 | 1566.7354 | -49.34 | 395   | - 407 | 0    | 22   | K.DAFLGSFLYEYSR.R     |
| 1724.7576 | 1723.7503 | 1723.8273 | -44.65 | 517   | - 530 | 0    | ---  | R.MPCTEDYLSLILNR.L    |
| 2044.9374 | 2043.9301 | 2044.0206 | -44.28 | 216   | - 231 | 1    | ---  | R.RHPYFYAPPELLYYANK.Y |

**No match to:** 805.4537, 842.4627, 848.4779, 850.0055, 850.4871, 853.4691, 864.5048, 865.9789, 868.4995, 870.5005, 876.9857, 882.5121, 882.5121, 892.9567, 919.4136, 951.5660, 982.5261, 996.5410, 1019.6234, 1033.6417, 1045.5149, 1051.6498, 1051.6498, 1065.5970, 1131.6476, 1133.6560, 1136.6389, 1142.5725, 1142.5725, 1147.6736, 1151.6641, 1165.6772, 1165.6773, 1175.5778, 1194.5631, 1300.7844, 1302.7943, 1316.8119, 1334.8163, 1334.8163, 1351.5889, 1414.8141, 1434.8339, 1448.8483, 1448.8483, 1457.7133, 1475.6820, 1498.6241, 1513.7238, 1513.7238, 1557.7402, 1583.9542, 1615.7332, 1617.9894, 1617.9894, 1630.7391, 1633.7523, 1647.7585, 1647.7585, 1697.8313, 1732.0159, 1901.1652, 2015.1964, 2184.3481, 2211.0227, 2283.0957, 2305.0806, 2530.2642

27. [A0A4W2HAU5](#) Mass: 24454 Score: 38 Expect: 21 Matches: 7

Peroxioredoxin like 2A OS=Bos indicus x Bos taurus OX=30522 GN=PRXL2A PE=4 SV=1

| Observed  | Mr(expt)  | Mr(calc)  | ppm    | Start | End   | Miss | Ions | Peptide                         |
|-----------|-----------|-----------|--------|-------|-------|------|------|---------------------------------|
| 996.5410  | 995.5337  | 995.5400  | -6.27  | 104   | - 111 | 1    | ---  | K.EHIKNEVK.D                    |
| 1065.5970 | 1064.5897 | 1064.5008 | 83.5   | 71    | - 78  | 0    | ---  | R.RPGCFPCR.E                    |
| 1151.6641 | 1150.6568 | 1150.6234 | 29.1   | 45    | - 54  | 1    | ---  | K.TLEKDAVTFK.A                  |
| 1194.5631 | 1193.5558 | 1193.5396 | 13.6   | 136   | - 144 | 1    | ---  | R.KMMFMGFVR.L + 3 Oxidation (M) |
| 1300.7844 | 1299.7771 | 1299.7510 | 20.1   | 196   | - 207 | 1    | ---  | K.VNLTSLVLEAARK.I               |
| 1414.8141 | 1413.8068 | 1413.6929 | 80.6   | 108   | - 118 | 1    | ---  | K.NEVKDFQPYFK.G                 |
| 1557.7402 | 1556.7329 | 1556.8497 | -75.00 | 57    | - 70  | 1    | ---  | K.ALWEKNGAVIMAVR.R              |

**No match to:** 805.4537, 842.4627, 848.4779, 850.0055, 850.4871, 853.4691, 864.5048, 865.9789, 868.4995, 870.5005, 876.9857, 882.5121, 882.5121, 892.9567, 919.4136, 927.4397, 951.5660, 982.5261, 1017.6141, 1017.6141, 1019.6234, 1033.6417, 1045.5149, 1051.6498, 1051.6498, 1131.6476, 1133.6560, 1136.6389, 1142.5725, 1142.5725, 1147.6736, 1165.6772, 1165.6773, 1175.5778, 1302.7943, 1316.8119, 1334.8163, 1334.8163, 1351.5889, 1434.8339, 1448.8483, 1448.8483, 1457.7133, 1475.6820, 1479.7203, 1479.7203, 1498.6241, 1513.7238, 1513.7238, 1567.6654, 1567.6654, 1583.9542, 1615.7332, 1617.9894, 1617.9894, 1630.7391, 1633.7523, 1647.7585, 1647.7585, 1697.8313, 1724.7576, 1732.0159, 1901.1652, 2015.1964, 2044.9374, 2184.3481, 2211.0227, 2283.0957, 2305.0806, 2530.2642

28. [Q3ZBK2](#) Mass: 24454 Score: 38 Expect: 21 Matches: 7

Peroxioredoxin-like 2A OS=Bos taurus OX=9913 GN=PRXL2A PE=2 SV=1

| Observed  | Mr(expt)  | Mr(calc)  | ppm    | Start | End   | Miss | Ions | Peptide                         |
|-----------|-----------|-----------|--------|-------|-------|------|------|---------------------------------|
| 996.5410  | 995.5337  | 995.5400  | -6.27  | 104   | - 111 | 1    | ---  | K.EHIKNEVK.D                    |
| 1065.5970 | 1064.5897 | 1064.5008 | 83.5   | 71    | - 78  | 0    | ---  | R.RPGCFPCR.E                    |
| 1151.6641 | 1150.6568 | 1150.6234 | 29.1   | 45    | - 54  | 1    | ---  | K.TLEKDAVTFK.A                  |
| 1194.5631 | 1193.5558 | 1193.5396 | 13.6   | 136   | - 144 | 1    | ---  | R.KMMFMGFVR.L + 3 Oxidation (M) |
| 1300.7844 | 1299.7771 | 1299.7510 | 20.1   | 196   | - 207 | 1    | ---  | K.VNLTSLVLEAARK.I               |
| 1414.8141 | 1413.8068 | 1413.6929 | 80.6   | 108   | - 118 | 1    | ---  | K.NEVKDFQPYFK.G                 |
| 1557.7402 | 1556.7329 | 1556.8497 | -75.00 | 57    | - 70  | 1    | ---  | K.ALWEKNGAVIMAVR.R              |

**No match to:** 805.4537, 842.4627, 848.4779, 850.0055, 850.4871, 853.4691, 864.5048, 865.9789, 868.4995, 870.5005, 876.9857, 882.5121, 882.5121, 892.9567, 919.4136, 927.4397, 951.5660, 982.5261, 1017.6141, 1017.6141, 1019.6234, 1033.6417, 1045.5149, 1051.6498, 1051.6498, 1131.6476, 1133.6560, 1136.6389, 1142.5725, 1142.5725, 1147.6736, 1165.6772, 1165.6773, 1175.5778, 1302.7943, 1316.8119, 1334.8163, 1334.8163, 1351.5889, 1434.8339, 1448.8483, 1448.8483, 1457.7133, 1475.6820, 1479.7203, 1479.7203, 1498.6241, 1513.7238, 1513.7238, 1567.6654, 1567.6654, 1583.9542, 1615.7332, 1617.9894, 1617.9894, 1630.7391, 1633.7523, 1647.7585, 1647.7585, 1697.8313, 1724.7576, 1732.0159, 1901.1652, 2015.1964, 2044.9374, 2184.3481, 2211.0227, 2283.0957, 2305.0806, 2530.2642

29. [A0A4W2H5Z2](#) Mass: 33370 Score: 37 Expect: 26 Matches: 7

Ketohexokinase OS=Bos indicus x Bos taurus OX=30522 GN=KHK PE=4 SV=1

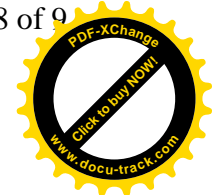

| Observed                                                                                                                                                                                                                                                                                                                                                                                                                                                                                                                                                                                                                                                                                                                                                                                    | Mr(expt)  | Mr(calc)  | ppm    | Start | End | Miss | Ions  | Peptide                             |
|---------------------------------------------------------------------------------------------------------------------------------------------------------------------------------------------------------------------------------------------------------------------------------------------------------------------------------------------------------------------------------------------------------------------------------------------------------------------------------------------------------------------------------------------------------------------------------------------------------------------------------------------------------------------------------------------------------------------------------------------------------------------------------------------|-----------|-----------|--------|-------|-----|------|-------|-------------------------------------|
| 850.4871                                                                                                                                                                                                                                                                                                                                                                                                                                                                                                                                                                                                                                                                                                                                                                                    | 849.4798  | 849.4821  | -2.65  | 210   | -   | 216  | 1 --- | R.GLYSRVR.K                         |
| 1065.5970                                                                                                                                                                                                                                                                                                                                                                                                                                                                                                                                                                                                                                                                                                                                                                                   | 1064.5897 | 1064.4961 | 87.9   | 289   | -   | 298  | 0 --- | K.CGLQGFGDGIV.-                     |
| 1133.6560                                                                                                                                                                                                                                                                                                                                                                                                                                                                                                                                                                                                                                                                                                                                                                                   | 1132.6487 | 1132.5560 | 81.9   | 32    | -   | 39   | 1 --- | R.CLSQRWQR.G                        |
| 1136.6389                                                                                                                                                                                                                                                                                                                                                                                                                                                                                                                                                                                                                                                                                                                                                                                   | 1135.6316 | 1135.5873 | 39.0   | 124   | -   | 132  | 1 --- | K.DFEKVELTR.F                       |
| 1615.7332                                                                                                                                                                                                                                                                                                                                                                                                                                                                                                                                                                                                                                                                                                                                                                                   | 1614.7259 | 1614.8227 | -59.91 | 78    | -   | 91   | 1 --- | R.QRGVDVSQVANQSR.G                  |
| 1630.7391                                                                                                                                                                                                                                                                                                                                                                                                                                                                                                                                                                                                                                                                                                                                                                                   | 1629.7318 | 1629.8376 | -64.89 | 66    | -   | 79   | 1 --- | R.GHVADFLVADFRQR.G                  |
| 1697.8313                                                                                                                                                                                                                                                                                                                                                                                                                                                                                                                                                                                                                                                                                                                                                                                   | 1696.8240 | 1696.8025 | 12.7   | 273   | -   | 287  | 1 --- | K.SMQEALRFGCQVAGK.K + Oxidation (M) |
| No match to: 805.4537, 842.4627, 848.4779, 850.0055, 853.4691, 864.5048, 865.9789, 868.4995, 870.5005, 876.9857, 882.5121, 882.5121, 892.9567, 919.4136, 927.4397, 951.5660, 982.5261, 996.5410, 1017.6141, 1017.6141, 1019.6234, 1033.6417, 1045.5149, 1051.6498, 1051.6498, 1131.6476, 1142.5725, 1142.5725, 1147.6736, 1151.6641, 1165.6772, 1165.6773, 1175.5778, 1194.5631, 1300.7844, 1302.7943, 1316.8119, 1334.8163, 1334.8163, 1351.5889, 1414.8141, 1434.8339, 1448.8483, 1448.8483, 1457.7133, 1475.6820, 1479.7203, 1479.7203, 1498.6241, 1513.7238, 1513.7238, 1557.7402, 1567.6654, 1567.6654, 1583.9542, 1617.9894, 1617.9894, 1633.7523, 1647.7585, 1647.7585, 1724.7576, 1732.0159, 1901.1652, 2015.1964, 2044.9374, 2184.3481, 2211.0227, 2283.0957, 2305.0806, 2530.2642 |           |           |        |       |     |      |       |                                     |

30. [P02769](#) Mass: 71244 Score: 36 Expect: 37 Matches: 7

Serum albumin OS=Bos taurus OX=9913 GN=ALB PE=1 SV=4

| Observed                                                                                                                                                                                                                                                                                                                                                                                                                                                                                                                                                                                                                                                                                                                                                              | Mr(expt)  | Mr(calc)  | ppm    | Start | End | Miss | Ions  | Peptide             |
|-----------------------------------------------------------------------------------------------------------------------------------------------------------------------------------------------------------------------------------------------------------------------------------------------------------------------------------------------------------------------------------------------------------------------------------------------------------------------------------------------------------------------------------------------------------------------------------------------------------------------------------------------------------------------------------------------------------------------------------------------------------------------|-----------|-----------|--------|-------|-----|------|-------|---------------------|
| 927.4397                                                                                                                                                                                                                                                                                                                                                                                                                                                                                                                                                                                                                                                                                                                                                              | 926.4324  | 926.4861  | -57.97 | 161   | -   | 167  | 0 --- | K.YLYEIR.R          |
| 1479.7203                                                                                                                                                                                                                                                                                                                                                                                                                                                                                                                                                                                                                                                                                                                                                             | 1478.7130 | 1478.7881 | -50.80 | 421   | -   | 433  | 0 --- | K.LGEYGFQNALIVR.Y   |
| 1479.7203                                                                                                                                                                                                                                                                                                                                                                                                                                                                                                                                                                                                                                                                                                                                                             | 1478.7131 | 1478.7881 | -50.77 | 421   | -   | 433  | 0 --- | K.LGEYGFQNALIVR.Y   |
| 1567.6654                                                                                                                                                                                                                                                                                                                                                                                                                                                                                                                                                                                                                                                                                                                                                             | 1566.6581 | 1566.7354 | -49.35 | 347   | -   | 359  | 0 --- | K.DAFLGSLYEYSR.R    |
| 1567.6654                                                                                                                                                                                                                                                                                                                                                                                                                                                                                                                                                                                                                                                                                                                                                             | 1566.6581 | 1566.7354 | -49.34 | 347   | -   | 359  | 0 22  | K.DAFLGSLYEYSR.R    |
| 1724.7576                                                                                                                                                                                                                                                                                                                                                                                                                                                                                                                                                                                                                                                                                                                                                             | 1723.7503 | 1723.8273 | -44.65 | 469   | -   | 482  | 0 --- | R.MPCTEDYLSLILNR.L  |
| 2044.9374                                                                                                                                                                                                                                                                                                                                                                                                                                                                                                                                                                                                                                                                                                                                                             | 2043.9301 | 2044.0206 | -44.28 | 168   | -   | 183  | 1 --- | R.RHVFYAPPELLYANK.Y |
| No match to: 805.4537, 842.4627, 848.4779, 850.0055, 850.4871, 853.4691, 864.5048, 865.9789, 868.4995, 870.5005, 876.9857, 882.5121, 882.5121, 892.9567, 919.4136, 951.5660, 982.5261, 996.5410, 1017.6141, 1017.6141, 1019.6234, 1033.6417, 1045.5149, 1051.6498, 1051.6498, 1065.5970, 1131.6476, 1133.6560, 1136.6389, 1142.5725, 1142.5725, 1147.6736, 1151.6641, 1165.6772, 1165.6773, 1175.5778, 1194.5631, 1300.7844, 1302.7943, 1316.8119, 1334.8163, 1334.8163, 1351.5889, 1414.8141, 1434.8339, 1448.8483, 1448.8483, 1457.7133, 1475.6820, 1498.6241, 1513.7238, 1557.7402, 1583.9542, 1615.7332, 1617.9894, 1617.9894, 1633.7523, 1647.7585, 1647.7585, 1697.8313, 1732.0159, 1901.1652, 2015.1964, 2184.3481, 2211.0227, 2283.0957, 2305.0806, 2530.2642 |           |           |        |       |     |      |       |                     |

## Search Parameters

Type of search : Sequence Query  
 Enzyme : Trypsin  
 Fixed modifications : [Carbamidomethyl \(C\)](#)  
 Variable modifications : [Oxidation \(M\)](#)  
 Mass values : Monoisotopic  
 Protein Mass : Unrestricted  
 Peptide Mass Tolerance :  $\pm 100$  ppm  
 Fragment Mass Tolerance :  $\pm 0.3$  Da  
 Max Missed Cleavages : 1  
 Instrument type : MALDI-TOF-TOF

Query1 (805.4537,1+): <no title>  
 Query2 (842.4627,1+): <no title>  
 Query3 (848.4779,1+): <no title>  
 Query4 (850.0055,1+): <no title>  
 Query5 (850.4871,1+): <no title>  
 Query6 (853.4691,1+): <no title>  
 Query7 (864.5048,1+): <no title>  
 Query8 (865.9789,1+): <no title>  
 Query9 (868.4995,1+): <no title>  
 Query10 (870.5005,1+): <no title>  
 Query11 (876.9857,1+): <no title>  
 Query12 (882.5121,1+): Locus:1..14.0.7  
 Query13 (882.5121,1+): <no title>  
 Query14 (892.9567,1+): <no title>  
 Query15 (919.4136,1+): <no title>  
 Query16 (927.4397,1+): <no title>  
 Query17 (951.5660,1+): <no title>  
 Query18 (982.5261,1+): <no title>  
 Query19 (996.5410,1+): <no title>  
 Query20 (1017.6141,1+): Locus:1..14.0.10  
 Query21 (1017.6141,1+): <no title>  
 Query22 (1019.6234,1+): <no title>  
 Query23 (1033.6417,1+): <no title>  
 Query24 (1045.5149,1+): <no title>  
 Query25 (1051.6498,1+): Locus:1..14.0.3  
 Query26 (1051.6498,1+): <no title>  
 Query27 (1065.5970,1+): <no title>  
 Query28 (1131.6476,1+): <no title>  
 Query29 (1133.6560,1+): <no title>  
 Query30 (1136.6389,1+): <no title>  
 Query31 (1142.5725,1+): <no title>  
 Query32 (1142.5725,1+): Locus:1..14.0.11  
 Query33 (1147.6736,1+): <no title>  
 Query34 (1151.6641,1+): <no title>  
 Query35 (1165.6772,1+): <no title>  
 Query36 (1165.6773,1+): Locus:1..14.0.8  
 Query37 (1175.5778,1+): <no title>  
 Query38 (1194.5631,1+): <no title>  
 Query39 (1300.7844,1+): <no title>  
 Query40 (1302.7943,1+): <no title>  
 Query41 (1316.8119,1+): <no title>  
 Query42 (1334.8163,1+): Locus:1..14.0.6  
 Query43 (1334.8163,1+): <no title>  
 Query44 (1351.5889,1+): <no title>  
 Query45 (1414.8141,1+): <no title>  
 Query46 (1434.8339,1+): <no title>  
 Query47 (1448.8483,1+): Locus:1..14.0.12  
 Query48 (1448.8483,1+): <no title>  
 Query49 (1457.7133,1+): <no title>  
 Query50 (1475.6820,1+): <no title>  
 Query51 (1479.7203,1+): <no title>  
 Query52 (1479.7203,1+): Locus:1..14.0.2  
 Query53 (1498.6241,1+): <no title>  
 Query54 (1513.7238,1+): Locus:1..14.0.1



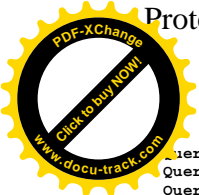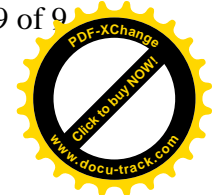

Query55 (1513.7238,1+): <no title>  
Query56 (1557.7402,1+): <no title>  
Query57 (1567.6654,1+): <no title>  
Query58 (1567.6654,1+): Locus:1..14.0.4  
Query59 (1583.9542,1+): <no title>  
Query60 (1615.7332,1+): <no title>  
Query61 (1617.9894,1+): Locus:1..14.0.9  
Query62 (1617.9894,1+): <no title>  
Query63 (1630.7391,1+): <no title>  
Query64 (1633.7523,1+): <no title>  
Query65 (1647.7585,1+): <no title>  
Query66 (1647.7585,1+): Locus:1..14.0.5  
Query67 (1697.8313,1+): <no title>  
Query68 (1724.7576,1+): <no title>  
Query69 (1732.0159,1+): <no title>  
Query70 (1901.1652,1+): <no title>  
Query71 (2015.1964,1+): <no title>  
Query72 (2044.9374,1+): <no title>  
Query73 (2184.3481,1+): <no title>  
Query74 (2211.0227,1+): <no title>  
Query75 (2283.0957,1+): <no title>  
Query76 (2305.0806,1+): <no title>  
Query77 (2530.2642,1+): <no title>

Mascot: <http://www.matrixscience.com/>
