# Supplementary material for: Alpha-2-Macroglobulin as a New Promising Biomarker Improving the Diagnostic Sensitivity of Bovine Paratuberculosis
Source: Frontiers journal article supplement (doi:10.3389/fvets.2021.637716), 2021-03-05
Supplement: Data_Sheet_1.zip [file Data_Sheet_1.zip]

MATRIX SCIENCE

Mascot Search Results

User :  
Email :  
Search title : BAEDW\2020\_3\_5\2020\_3\_5\MSMS 14\M17  
Database : Uniprot\_bovine\_bovine\_20200316 (134392 sequences; 76244912 residues)  
Timestamp : 31 Mar 2020 at 01:07:59 GMT  
Warning : A Peptide summary report will usually give a much clearer picture of MS/MS search results.  
Top Score : 86 for A0A4W2D411, Complement C3 OS=Bos indicus x Bos taurus OX=30522 GN=C3 PE=4 SV=1

Mascot Score Histogram

Protein score is -10\*Log(P), where P is the probability that the observed match is a random event.  
Protein scores greater than 64 are significant (p<0.05).  
Protein scores are derived from ions scores as a non-probabilistic basis for ranking protein hits.

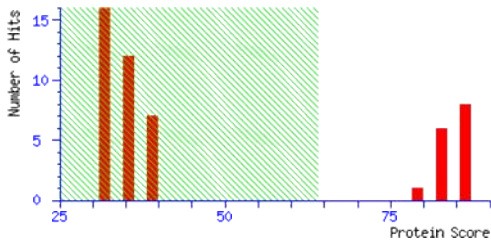

Protein Summary Report

Format As Protein Summary (deprecated) Help

Significance threshold p< 0.05 Max. number of hits 30

Preferred taxonomy All entries

Re-Search All Search Unmatched

Index

| Accession                      | Mass   | Score | Description                                                                                     |
|--------------------------------|--------|-------|-------------------------------------------------------------------------------------------------|
| 1. <a href="#">A0A4W2D411</a>  | 190190 | 86    | Complement C3 OS=Bos indicus x Bos taurus OX=30522 GN=C3 PE=4 SV=1                              |
| 2. <a href="#">A0A4W2CZQ8</a>  | 170639 | 86    | Complement C3 OS=Bos indicus x Bos taurus OX=30522 GN=C3 PE=4 SV=1                              |
| 3. <a href="#">A0A4W2D441</a>  | 186349 | 85    | Complement C3 OS=Bos indicus x Bos taurus OX=30522 GN=C3 PE=4 SV=1                              |
| 4. <a href="#">A0A4W2CZN6</a>  | 192486 | 85    | Complement C3 OS=Bos indicus x Bos taurus OX=30522 GN=C3 PE=4 SV=1                              |
| 5. <a href="#">A0A4W2EPV7</a>  | 179159 | 85    | Complement C3 OS=Bos indicus x Bos taurus OX=30522 GN=C3 PE=4 SV=1                              |
| 6. <a href="#">A0A4W2D408</a>  | 180682 | 85    | Complement C3 OS=Bos indicus x Bos taurus OX=30522 GN=C3 PE=4 SV=1                              |
| 7. <a href="#">A0A4W2HFJ5</a>  | 188690 | 85    | Complement C3 OS=Bos indicus x Bos taurus OX=30522 GN=C3 PE=4 SV=1                              |
| 8. <a href="#">Q2UVX4</a>      | 188675 | 85    | Complement C3 OS=Bos taurus OX=9913 GN=C3 PE=1 SV=2                                             |
| 9. <a href="#">A0A4W2D406</a>  | 186684 | 84    | Complement C3 OS=Bos indicus x Bos taurus OX=30522 GN=C3 PE=4 SV=1                              |
| 10. <a href="#">A0A3Q1MGT0</a> | 183008 | 84    | Complement C3 OS=Bos taurus OX=9913 GN=C3 PE=1 SV=1                                             |
| 11. <a href="#">A0A4W2D3Y9</a> | 185555 | 84    | Complement C3 OS=Bos indicus x Bos taurus OX=30522 GN=C3 PE=4 SV=1                              |
| 12. <a href="#">A0A3Q1M2B2</a> | 185169 | 83    | Complement C3 OS=Bos taurus OX=9913 GN=C3 PE=1 SV=1                                             |
| 13. <a href="#">A0A0F6QNP7</a> | 188604 | 83    | Complement component 3 OS=Bos taurus OX=9913 GN=C3 PE=2 SV=1                                    |
| 14. <a href="#">A0A4W2EPI5</a> | 182918 | 82    | Complement C3 OS=Bos indicus x Bos taurus OX=30522 GN=C3 PE=4 SV=1                              |
| 15. <a href="#">A0A3Q1MHV6</a> | 181738 | 81    | Complement C3 OS=Bos taurus OX=9913 GN=C3 PE=1 SV=1                                             |
| 16. <a href="#">A0A4W2FTD2</a> | 57549  | 40    | Uncharacterized protein OS=Bos indicus x Bos taurus OX=30522 GN=LOC113883749 PE=3 SV=1          |
| 17. <a href="#">A0A4W2BNQ3</a> | 57413  | 40    | Uncharacterized protein OS=Bos indicus x Bos taurus OX=30522 GN=LOC113883746 PE=3 SV=1          |
| 18. <a href="#">A0A4W2HPR9</a> | 57408  | 40    | Uncharacterized protein OS=Bos indicus x Bos taurus OX=30522 GN=LOC113883749 PE=3 SV=1          |
| 19. <a href="#">A0A4W2BMU5</a> | 57554  | 40    | Uncharacterized protein OS=Bos indicus x Bos taurus OX=30522 GN=LOC113883746 PE=3 SV=1          |
| 20. <a href="#">Q3T047</a>     | 57540  | 40    | Cytochrome P450, family 3, subfamily A, polypeptide 5 OS=Bos taurus OX=9913 GN=CYP3A5 PE=1 SV=1 |
| 21. <a href="#">A0A3Q1MUB2</a> | 54957  | 39    | Glucosaminyl (N-acetyl) transferase 4 OS=Bos taurus OX=9913 GN=GCNT4 PE=4 SV=1                  |
| 22. <a href="#">F1MDR5</a>     | 92495  | 38    | Uncharacterized protein OS=Bos taurus OX=9913 GN=MIA2 PE=4 SV=1                                 |
| 23. <a href="#">Q08DU7</a>     | 51251  | 37    | mTERF protein (Fragment) OS=Bos taurus OX=9913 GN=MTERF PE=2 SV=1                               |
| 24. <a href="#">A0A4W2FV66</a> | 129413 | 37    | Replication factor C subunit 1 OS=Bos indicus x Bos taurus OX=30522 GN=RFC1 PE=3 SV=1           |
| 25. <a href="#">A0A4W2EXE5</a> | 129354 | 36    | Replication factor C subunit 1 OS=Bos indicus x Bos taurus OX=30522 GN=RFC1 PE=3 SV=1           |
| 26. <a href="#">A0A4W2BTQ2</a> | 97692  | 36    | Kinesin-like protein OS=Bos indicus x Bos taurus OX=30522 GN=KIF9 PE=3 SV=1                     |
| 27. <a href="#">A0A0K2YTL5</a> | 9022   | 36    | Uncharacterized protein OS=Cowpox virus OX=10243 GN=gCPXV0248 PE=4 SV=1                         |
| 28. <a href="#">A0A3Q1N5S1</a> | 128941 | 36    | Replication factor C subunit 1 OS=Bos taurus OX=9913 GN=RFC1 PE=3 SV=1                          |
| 29. <a href="#">A0A4W2H4H4</a> | 50468  | 35    | Interferon induced protein 44 like OS=Bos indicus x Bos taurus OX=30522 GN=IFI44L PE=4 SV=1     |
| 30. <a href="#">A0A4W2BTP7</a> | 104127 | 35    | Kinesin-like protein OS=Bos indicus x Bos taurus OX=30522 GN=KIF9 PE=3 SV=1                     |

Results List

|                                                                    |                            |              |           |                 |                                             |
|--------------------------------------------------------------------|----------------------------|--------------|-----------|-----------------|---------------------------------------------|
| 1.                                                                 | <a href="#">A0A4W2D411</a> | Mass: 190190 | Score: 86 | Expect: 0.00032 | Matches: 18                                 |
| Complement C3 OS=Bos indicus x Bos taurus OX=30522 GN=C3 PE=4 SV=1 |                            |              |           |                 |                                             |
|                                                                    | Observed                   | Mr(expt)     | Mr(calc)  | ppm             | Start End Miss Ions Peptide                 |
|                                                                    | 833.4543                   | 832.4470     | 832.4807  | -40.43          | 868 - 874 0 --- R.LPYSVVVR.N                |
|                                                                    | 833.4543                   | 832.4471     | 832.4807  | -40.37          | 868 - 874 0 29 R.LPYSVVVR.N                 |
|                                                                    | 848.4947                   | 847.4874     | 847.4400  | 56.0            | 1453 - 1460 0 --- K.TLSTGVDR.Y              |
|                                                                    | 850.5049                   | 849.4976     | 849.4266  | 83.6            | 704 - 710 0 --- R.SVQLMEK.R + Oxidation (M) |
|                                                                    | 864.5046                   | 863.4973     | 863.4939  | 3.99            | 823 - 829 0 --- K.LMNVFLK.D                 |
|                                                                    | 887.4306                   | 886.4233     | 886.4508  | -31.02          | 875 - 881 0 --- R.NEQVEIR.A                 |
|                                                                    | 912.4536                   | 911.4463     | 911.4865  | -44.04          | 882 - 888 0 --- R.AILYNYR.E                 |
|                                                                    | 912.4536                   | 911.4463     | 911.4865  | -44.03          | 882 - 888 0 28 R.AILYNYR.E                  |
|                                                                    | 996.5558                   | 995.5485     | 995.4672  | 81.7            | 715 - 723 0 --- K.AGQYSSDLR.K               |
|                                                                    | 1090.4866                  | 1089.4793    | 1089.4873 | -7.34           | 655 - 665 0 --- K.ADICTPGSGR.N              |
|                                                                    | 1164.6057                  | 1163.5984    | 1163.6411 | -36.67          | 915 - 924 0 --- R.HQQTITIPAR.S              |
|                                                                    | 1349.6270                  | 1348.6197    | 1348.6809 | -45.38          | 743 - 754 0 --- R.AQPILQGDACVK.A            |

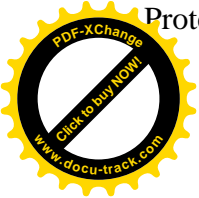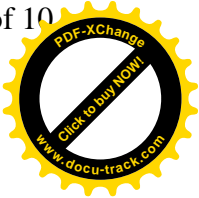

|                                                                                                                                                                                                                                                                                                                                                                                                                                                                                                                                                                                                                                                                        |           |           |        |     |   |     |   |     |                                 |
|------------------------------------------------------------------------------------------------------------------------------------------------------------------------------------------------------------------------------------------------------------------------------------------------------------------------------------------------------------------------------------------------------------------------------------------------------------------------------------------------------------------------------------------------------------------------------------------------------------------------------------------------------------------------|-----------|-----------|--------|-----|---|-----|---|-----|---------------------------------|
| 1420.6680                                                                                                                                                                                                                                                                                                                                                                                                                                                                                                                                                                                                                                                              | 1419.6607 | 1419.7147 | -37.99 | 947 | - | 959 | 0 | --- | K.AAVYNHFISDGVK.K               |
| 1427.7352                                                                                                                                                                                                                                                                                                                                                                                                                                                                                                                                                                                                                                                              | 1426.7279 | 1426.6625 | 45.9   | 521 | - | 531 | 1 | --- | R.YYTYMIMNKGK.L + Oxidation (M) |
| 1796.8849                                                                                                                                                                                                                                                                                                                                                                                                                                                                                                                                                                                                                                                              | 1795.8776 | 1795.9178 | -22.39 | 897 | - | 912 | 0 | --- | R.VELLYNPAFCSLATAK.K            |
| 1977.9272                                                                                                                                                                                                                                                                                                                                                                                                                                                                                                                                                                                                                                                              | 1976.9199 | 1976.9884 | -34.62 | 797 | - | 812 | 0 | --- | R.SQFPESWLWTVIDLK.Q             |
| 2052.0193                                                                                                                                                                                                                                                                                                                                                                                                                                                                                                                                                                                                                                                              | 2051.0120 | 2051.0874 | -36.73 | 895 | - | 912 | 1 | --- | K.VRVELLYNPAFCSLATAK.K          |
| 2488.1152                                                                                                                                                                                                                                                                                                                                                                                                                                                                                                                                                                                                                                                              | 2487.1079 | 2487.1814 | -29.56 | 847 | - | 867 | 0 | --- | K.GICVADPYEVTVMQDFFIDLR.L       |
| No match to: 842.4758, 853.4832, 855.4396, 865.9906, 868.5154, 868.5154, 870.5118, 877.0043, 882.5307, 882.5307, 892.9702, 951.5852, 969.4808, 973.4983, 1017.6315, 1017.6315, 1019.6440, 1033.6599, 1045.5276, 1051.6682, 1051.6682, 1066.4620, 1131.6697, 1151.6833, 1157.5516, 1165.6611, 1165.6611, 1179.5520, 1193.5681, 1277.6617, 1277.6617, 1300.8000, 1307.6257, 1307.6257, 1320.5388, 1334.8374, 1334.8374, 1351.6090, 1365.5970, 1383.6307, 1434.7792, 1448.8667, 1458.6595, 1475.6919, 1487.6974, 1612.7894, 1618.0076, 1618.0076, 1697.8160, 1697.8160, 1707.7140, 1716.7928, 1732.0361, 1838.8502, 1901.1791, 1993.9021, 2211.0298, 2283.1060, 2398.9456 |           |           |        |     |   |     |   |     |                                 |

2. [A0A4W2CZQ8](#) Mass: 170639 Score: 86 Expect: 0.00033 Matches: 18

|                                                                                                                                                                                                                                                                                                                                                                                                                                                                                                                                                                                                                                                                        |           |           |                      |          |       |      |      |         |                                 |
|------------------------------------------------------------------------------------------------------------------------------------------------------------------------------------------------------------------------------------------------------------------------------------------------------------------------------------------------------------------------------------------------------------------------------------------------------------------------------------------------------------------------------------------------------------------------------------------------------------------------------------------------------------------------|-----------|-----------|----------------------|----------|-------|------|------|---------|---------------------------------|
| Complement                                                                                                                                                                                                                                                                                                                                                                                                                                                                                                                                                                                                                                                             | C3        | OS=Bos    | indicus x Bos taurus | OX=30522 | GN=C3 | PE=4 | SV=1 |         |                                 |
| Observed                                                                                                                                                                                                                                                                                                                                                                                                                                                                                                                                                                                                                                                               | Mr(expt)  | Mr(calc)  | ppm                  | Start    | End   | Miss | Ions | Peptide |                                 |
| 833.4543                                                                                                                                                                                                                                                                                                                                                                                                                                                                                                                                                                                                                                                               | 832.4470  | 832.4807  | -40.43               | 803      | -     | 809  | 0    | ---     | R.LPYSVVR.N                     |
| 833.4543                                                                                                                                                                                                                                                                                                                                                                                                                                                                                                                                                                                                                                                               | 832.4471  | 832.4807  | -40.37               | 803      | -     | 809  | 0    | 29      | R.LPYSVVR.N                     |
| 848.4947                                                                                                                                                                                                                                                                                                                                                                                                                                                                                                                                                                                                                                                               | 847.4874  | 847.4400  | 56.0                 | 1281     | -     | 1288 | 0    | ---     | K.TLSTGVDR.Y                    |
| 850.5049                                                                                                                                                                                                                                                                                                                                                                                                                                                                                                                                                                                                                                                               | 849.4976  | 849.4266  | 83.6                 | 639      | -     | 645  | 0    | ---     | R.SVQLMEK.R + Oxidation (M)     |
| 864.5046                                                                                                                                                                                                                                                                                                                                                                                                                                                                                                                                                                                                                                                               | 863.4973  | 863.4939  | 3.99                 | 758      | -     | 764  | 0    | ---     | K.LMNVFLK.D                     |
| 887.4306                                                                                                                                                                                                                                                                                                                                                                                                                                                                                                                                                                                                                                                               | 886.4233  | 886.4508  | -31.02               | 810      | -     | 816  | 0    | ---     | R.NEQVEIR.A                     |
| 912.4536                                                                                                                                                                                                                                                                                                                                                                                                                                                                                                                                                                                                                                                               | 911.4463  | 911.4865  | -44.04               | 817      | -     | 823  | 0    | ---     | R.AILYNYR.E                     |
| 912.4536                                                                                                                                                                                                                                                                                                                                                                                                                                                                                                                                                                                                                                                               | 911.4463  | 911.4865  | -44.03               | 817      | -     | 823  | 0    | 28      | R.AILYNYR.E                     |
| 996.5558                                                                                                                                                                                                                                                                                                                                                                                                                                                                                                                                                                                                                                                               | 995.5485  | 995.4672  | 81.7                 | 650      | -     | 658  | 0    | ---     | K.AGQYSSDLR.K                   |
| 1090.4866                                                                                                                                                                                                                                                                                                                                                                                                                                                                                                                                                                                                                                                              | 1089.4793 | 1089.4873 | -7.34                | 590      | -     | 600  | 0    | ---     | K.ADIGCTPGSGR.N                 |
| 1164.6057                                                                                                                                                                                                                                                                                                                                                                                                                                                                                                                                                                                                                                                              | 1163.5984 | 1163.6411 | -36.67               | 850      | -     | 859  | 0    | ---     | R.HQQTITIPAR.S                  |
| 1349.6270                                                                                                                                                                                                                                                                                                                                                                                                                                                                                                                                                                                                                                                              | 1348.6197 | 1348.6809 | -45.38               | 678      | -     | 689  | 0    | ---     | R.AQFILQGDACVK.A                |
| 1420.6680                                                                                                                                                                                                                                                                                                                                                                                                                                                                                                                                                                                                                                                              | 1419.6607 | 1419.7147 | -37.99               | 882      | -     | 894  | 0    | ---     | K.AAVYNHFISDGVK.K               |
| 1427.7352                                                                                                                                                                                                                                                                                                                                                                                                                                                                                                                                                                                                                                                              | 1426.7279 | 1426.6625 | 45.9                 | 487      | -     | 497  | 1    | ---     | R.YYTYMIMNKGK.L + Oxidation (M) |
| 1796.8849                                                                                                                                                                                                                                                                                                                                                                                                                                                                                                                                                                                                                                                              | 1795.8776 | 1795.9178 | -22.39               | 832      | -     | 847  | 0    | ---     | R.VELLYNPAFCSLATAK.K            |
| 1977.9272                                                                                                                                                                                                                                                                                                                                                                                                                                                                                                                                                                                                                                                              | 1976.9199 | 1976.9884 | -34.62               | 732      | -     | 747  | 0    | ---     | R.SQFPESWLWTVIDLK.Q             |
| 2052.0193                                                                                                                                                                                                                                                                                                                                                                                                                                                                                                                                                                                                                                                              | 2051.0120 | 2051.0874 | -36.73               | 830      | -     | 847  | 1    | ---     | K.VRVELLYNPAFCSLATAK.K          |
| 2488.1152                                                                                                                                                                                                                                                                                                                                                                                                                                                                                                                                                                                                                                                              | 2487.1079 | 2487.1814 | -29.56               | 782      | -     | 802  | 0    | ---     | K.GICVADPYEVTVMQDFFIDLR.L       |
| No match to: 842.4758, 853.4832, 855.4396, 865.9906, 868.5154, 868.5154, 870.5118, 877.0043, 882.5307, 882.5307, 892.9702, 951.5852, 969.4808, 973.4983, 1017.6315, 1017.6315, 1019.6440, 1033.6599, 1045.5276, 1051.6682, 1051.6682, 1066.4620, 1131.6697, 1151.6833, 1157.5516, 1165.6611, 1165.6611, 1179.5520, 1193.5681, 1277.6617, 1277.6617, 1300.8000, 1307.6257, 1307.6257, 1320.5388, 1334.8374, 1334.8374, 1351.6090, 1365.5970, 1383.6307, 1434.7792, 1448.8667, 1458.6595, 1475.6919, 1487.6974, 1612.7894, 1618.0076, 1618.0076, 1697.8160, 1697.8160, 1707.7140, 1716.7928, 1732.0361, 1838.8502, 1901.1791, 1993.9021, 2211.0298, 2283.1060, 2398.9456 |           |           |                      |          |       |      |      |         |                                 |

3. [A0A4W2D441](#) Mass: 186349 Score: 85 Expect: 0.00039 Matches: 18

|                                                                                                                                                                                                                                                                                                                                                                                                                                                                                                                                                                                                                                                                        |           |           |                      |          |       |      |      |         |                                 |
|------------------------------------------------------------------------------------------------------------------------------------------------------------------------------------------------------------------------------------------------------------------------------------------------------------------------------------------------------------------------------------------------------------------------------------------------------------------------------------------------------------------------------------------------------------------------------------------------------------------------------------------------------------------------|-----------|-----------|----------------------|----------|-------|------|------|---------|---------------------------------|
| Complement                                                                                                                                                                                                                                                                                                                                                                                                                                                                                                                                                                                                                                                             | C3        | OS=Bos    | indicus x Bos taurus | OX=30522 | GN=C3 | PE=4 | SV=1 |         |                                 |
| Observed                                                                                                                                                                                                                                                                                                                                                                                                                                                                                                                                                                                                                                                               | Mr(expt)  | Mr(calc)  | ppm                  | Start    | End   | Miss | Ions | Peptide |                                 |
| 833.4543                                                                                                                                                                                                                                                                                                                                                                                                                                                                                                                                                                                                                                                               | 832.4470  | 832.4807  | -40.43               | 834      | -     | 840  | 0    | ---     | R.LPYSVVR.N                     |
| 833.4543                                                                                                                                                                                                                                                                                                                                                                                                                                                                                                                                                                                                                                                               | 832.4471  | 832.4807  | -40.37               | 834      | -     | 840  | 0    | 29      | R.LPYSVVR.N                     |
| 848.4947                                                                                                                                                                                                                                                                                                                                                                                                                                                                                                                                                                                                                                                               | 847.4874  | 847.4400  | 56.0                 | 1419     | -     | 1426 | 0    | ---     | K.TLSTGVDR.Y                    |
| 850.5049                                                                                                                                                                                                                                                                                                                                                                                                                                                                                                                                                                                                                                                               | 849.4976  | 849.4266  | 83.6                 | 670      | -     | 676  | 0    | ---     | R.SVQLMEK.R + Oxidation (M)     |
| 864.5046                                                                                                                                                                                                                                                                                                                                                                                                                                                                                                                                                                                                                                                               | 863.4973  | 863.4939  | 3.99                 | 789      | -     | 795  | 0    | ---     | K.LMNVFLK.D                     |
| 887.4306                                                                                                                                                                                                                                                                                                                                                                                                                                                                                                                                                                                                                                                               | 886.4233  | 886.4508  | -31.02               | 841      | -     | 847  | 0    | ---     | R.NEQVEIR.A                     |
| 912.4536                                                                                                                                                                                                                                                                                                                                                                                                                                                                                                                                                                                                                                                               | 911.4463  | 911.4865  | -44.04               | 848      | -     | 854  | 0    | ---     | R.AILYNYR.E                     |
| 912.4536                                                                                                                                                                                                                                                                                                                                                                                                                                                                                                                                                                                                                                                               | 911.4463  | 911.4865  | -44.03               | 848      | -     | 854  | 0    | 28      | R.AILYNYR.E                     |
| 996.5558                                                                                                                                                                                                                                                                                                                                                                                                                                                                                                                                                                                                                                                               | 995.5485  | 995.4672  | 81.7                 | 681      | -     | 689  | 0    | ---     | K.AGQYSSDLR.K                   |
| 1090.4866                                                                                                                                                                                                                                                                                                                                                                                                                                                                                                                                                                                                                                                              | 1089.4793 | 1089.4873 | -7.34                | 621      | -     | 631  | 0    | ---     | K.ADIGCTPGSGR.N                 |
| 1164.6057                                                                                                                                                                                                                                                                                                                                                                                                                                                                                                                                                                                                                                                              | 1163.5984 | 1163.6411 | -36.67               | 881      | -     | 890  | 0    | ---     | R.HQQTITIPAR.S                  |
| 1349.6270                                                                                                                                                                                                                                                                                                                                                                                                                                                                                                                                                                                                                                                              | 1348.6197 | 1348.6809 | -45.38               | 709      | -     | 720  | 0    | ---     | R.AQFILQGDACVK.A                |
| 1420.6680                                                                                                                                                                                                                                                                                                                                                                                                                                                                                                                                                                                                                                                              | 1419.6607 | 1419.7147 | -37.99               | 913      | -     | 925  | 0    | ---     | K.AAVYNHFISDGVK.K               |
| 1427.7352                                                                                                                                                                                                                                                                                                                                                                                                                                                                                                                                                                                                                                                              | 1426.7279 | 1426.6625 | 45.9                 | 487      | -     | 497  | 1    | ---     | R.YYTYMIMNKGK.L + Oxidation (M) |
| 1796.8849                                                                                                                                                                                                                                                                                                                                                                                                                                                                                                                                                                                                                                                              | 1795.8776 | 1795.9178 | -22.39               | 863      | -     | 878  | 0    | ---     | R.VELLYNPAFCSLATAK.K            |
| 1977.9272                                                                                                                                                                                                                                                                                                                                                                                                                                                                                                                                                                                                                                                              | 1976.9199 | 1976.9884 | -34.62               | 763      | -     | 778  | 0    | ---     | R.SQFPESWLWTVIDLK.Q             |
| 2052.0193                                                                                                                                                                                                                                                                                                                                                                                                                                                                                                                                                                                                                                                              | 2051.0120 | 2051.0874 | -36.73               | 861      | -     | 878  | 1    | ---     | K.VRVELLYNPAFCSLATAK.K          |
| 2488.1152                                                                                                                                                                                                                                                                                                                                                                                                                                                                                                                                                                                                                                                              | 2487.1079 | 2487.1814 | -29.56               | 813      | -     | 833  | 0    | ---     | K.GICVADPYEVTVMQDFFIDLR.L       |
| No match to: 842.4758, 853.4832, 855.4396, 865.9906, 868.5154, 868.5154, 870.5118, 877.0043, 882.5307, 882.5307, 892.9702, 951.5852, 969.4808, 973.4983, 1017.6315, 1017.6315, 1019.6440, 1033.6599, 1045.5276, 1051.6682, 1051.6682, 1066.4620, 1131.6697, 1151.6833, 1157.5516, 1165.6611, 1165.6611, 1179.5520, 1193.5681, 1277.6617, 1277.6617, 1300.8000, 1307.6257, 1307.6257, 1320.5388, 1334.8374, 1334.8374, 1351.6090, 1365.5970, 1383.6307, 1434.7792, 1448.8667, 1458.6595, 1475.6919, 1487.6974, 1612.7894, 1618.0076, 1618.0076, 1697.8160, 1697.8160, 1707.7140, 1716.7928, 1732.0361, 1838.8502, 1901.1791, 1993.9021, 2211.0298, 2283.1060, 2398.9456 |           |           |                      |          |       |      |      |         |                                 |

4. [A0A4W2CZN6](#) Mass: 192486 Score: 85 Expect: 0.00039 Matches: 18

|            |           |           |                      |          |       |      |      |         |                                 |
|------------|-----------|-----------|----------------------|----------|-------|------|------|---------|---------------------------------|
| Complement | C3        | OS=Bos    | indicus x Bos taurus | OX=30522 | GN=C3 | PE=4 | SV=1 |         |                                 |
| Observed   | Mr(expt)  | Mr(calc)  | ppm                  | Start    | End   | Miss | Ions | Peptide |                                 |
| 833.4543   | 832.4470  | 832.4807  | -40.43               | 868      | -     | 874  | 0    | ---     | R.LPYSVVR.N                     |
| 833.4543   | 832.4471  | 832.4807  | -40.37               | 868      | -     | 874  | 0    | 29      | R.LPYSVVR.N                     |
| 848.4947   | 847.4874  | 847.4400  | 56.0                 | 1453     | -     | 1460 | 0    | ---     | K.TLSTGVDR.Y                    |
| 850.5049   | 849.4976  | 849.4266  | 83.6                 | 704      | -     | 710  | 0    | ---     | R.SVQLMEK.R + Oxidation (M)     |
| 864.5046   | 863.4973  | 863.4939  | 3.99                 | 823      | -     | 829  | 0    | ---     | K.LMNVFLK.D                     |
| 887.4306   | 886.4233  | 886.4508  | -31.02               | 875      | -     | 881  | 0    | ---     | R.NEQVEIR.A                     |
| 912.4536   | 911.4463  | 911.4865  | -44.04               | 882      | -     | 888  | 0    | ---     | R.AILYNYR.E                     |
| 912.4536   | 911.4463  | 911.4865  | -44.03               | 882      | -     | 888  | 0    | 28      | R.AILYNYR.E                     |
| 996.5558   | 995.5485  | 995.4672  | 81.7                 | 715      | -     | 723  | 0    | ---     | K.AGQYSSDLR.K                   |
| 1090.4866  | 1089.4793 | 1089.4873 | -7.34                | 655      | -     | 665  | 0    | ---     | K.ADIGCTPGSGR.N                 |
| 1164.6057  | 1163.5984 | 1163.6411 | -36.67               | 915      | -     | 924  | 0    | ---     | R.HQQTITIPAR.S                  |
| 1349.6270  | 1348.6197 | 1348.6809 | -45.38               | 743      | -     | 754  | 0    | ---     | R.AQFILQGDACVK.A                |
| 1420.6680  | 1419.6607 | 1419.7147 | -37.99               | 947      | -     | 959  | 0    | ---     | K.AAVYNHFISDGVK.K               |
| 1427.7352  | 1426.7279 | 1426.6625 | 45.9                 | 521      | -     | 531  | 1    | ---     | R.YYTYMIMNKGK.L + Oxidation (M) |
| 1796.8849  | 1795.8776 | 1795.9178 | -22.39               | 897      | -     | 912  | 0    | ---     | R.VELLYNPAFCSLATAK.K            |
| 1977.9272  | 1976.9199 | 1976.9884 | -34.62               | 797      | -     | 812  | 0    | ---     | R.SQFPESWLWTVIDLK.Q             |
| 2052.0193  | 2051.0120 | 2051.0874 | -36.73               | 895      | -     | 912  | 1    | ---     | K.VRVELLYNPAFCSLATAK.K          |
| 2488.1152  | 2487.1079 | 2487.1814 | -29.56               | 847      | -     | 867  | 0    | ---     | K.GICVADPYEVTVMQDFFIDLR.L       |

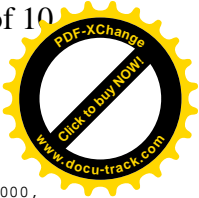

No match to: 842.4758, 853.4832, 855.4396, 865.9906, 868.5154, 868.5154, 870.5118, 877.0043, 882.5307, 882.5307, 892.9702, 951.5852, 969.4808, 973.4983, 1017.6315, 1017.6315, 1019.6440, 1033.6599, 1045.5276, 1051.6682, 1051.6682, 1066.4620, 1131.6697, 1151.6833, 1157.5516, 1165.6611, 1165.6611, 1179.5520, 1193.5681, 1277.6617, 1277.6617, 1300.8000, 1307.6257, 1307.6257, 1320.5388, 1334.8374, 1334.8374, 1351.6090, 1365.5970, 1383.6307, 1434.7792, 1448.8667, 1458.6595, 1475.6919, 1487.6974, 1612.7894, 1618.0076, 1618.0076, 1697.8160, 1697.8160, 1707.7140, 1716.7928, 1732.0361, 1838.8502, 1901.1791, 1993.9021, 2211.0298, 2283.1060, 2398.9456

5. [A0A4W2EPV7](#) Mass: 179159 Score: 85 Expect: 0.00041 Matches: 18

Complement C3 OS=Bos indicus x Bos taurus OX=30522 GN=C3 PE=4 SV=1

| Observed  | Mr(expt)  | Mr(calc)  | ppm    | Start | End | Miss | Ions | Peptide                       |
|-----------|-----------|-----------|--------|-------|-----|------|------|-------------------------------|
| 833.4543  | 832.4470  | 832.4807  | -40.43 | 803   | -   | 809  | 0    | R.LPYSVVR.N                   |
| 833.4543  | 832.4471  | 832.4807  | -40.37 | 803   | -   | 809  | 0    | R.LPYSVVR.N                   |
| 848.4947  | 847.4874  | 847.4400  | 56.0   | 1355  | -   | 1362 | 0    | K.TLSTGVDR.Y                  |
| 850.5049  | 849.4976  | 849.4266  | 83.6   | 639   | -   | 645  | 0    | R.SVQLMEK.R + Oxidation (M)   |
| 864.5046  | 863.4973  | 863.4939  | 3.99   | 758   | -   | 764  | 0    | K.LMNVFLK.D                   |
| 887.4306  | 886.4233  | 886.4508  | -31.02 | 810   | -   | 816  | 0    | R.NEQVEIR.A                   |
| 912.4536  | 911.4463  | 911.4865  | -44.04 | 817   | -   | 823  | 0    | R.AILYNYR.E                   |
| 912.4536  | 911.4463  | 911.4865  | -44.03 | 817   | -   | 823  | 0    | R.AILYNYR.E                   |
| 996.5558  | 995.5485  | 995.4672  | 81.7   | 650   | -   | 658  | 0    | K.AGQYSSDLR.K                 |
| 1090.4866 | 1089.4793 | 1089.4873 | -7.34  | 590   | -   | 600  | 0    | K.ADIGCTPGSGR.N               |
| 1164.6057 | 1163.5984 | 1163.6411 | -36.67 | 850   | -   | 859  | 0    | R.HQQTITIPAR.S                |
| 1349.6270 | 1348.6197 | 1348.6809 | -45.38 | 678   | -   | 689  | 0    | R.AQFILQGDACVK.A              |
| 1420.6680 | 1419.6607 | 1419.7147 | -37.99 | 882   | -   | 894  | 0    | K.AAVYNHFISDGVK.K             |
| 1427.7352 | 1426.7279 | 1426.6625 | 45.9   | 487   | -   | 497  | 1    | R.YITYMIMNKGL + Oxidation (M) |
| 1796.8849 | 1795.8776 | 1795.9178 | -22.39 | 832   | -   | 847  | 0    | R.VELLYNPAPFCSLATAK.K         |
| 1977.9272 | 1976.9199 | 1976.9884 | -34.62 | 732   | -   | 747  | 0    | R.SQFPESLWLTVIDLK.Q           |
| 2052.0193 | 2051.0120 | 2051.0874 | -36.73 | 830   | -   | 847  | 1    | K.VRVVELLYNPAPFCSLATAK.K      |
| 2488.1152 | 2487.1079 | 2487.1814 | -29.56 | 782   | -   | 802  | 0    | K.GICVADPYEVTVMQDFFIDLR.L     |

No match to: 842.4758, 853.4832, 855.4396, 865.9906, 868.5154, 868.5154, 870.5118, 877.0043, 882.5307, 882.5307, 892.9702, 951.5852, 969.4808, 973.4983, 1017.6315, 1017.6315, 1019.6440, 1033.6599, 1045.5276, 1051.6682, 1051.6682, 1066.4620, 1131.6697, 1151.6833, 1157.5516, 1165.6611, 1165.6611, 1179.5520, 1193.5681, 1277.6617, 1277.6617, 1300.8000, 1307.6257, 1307.6257, 1320.5388, 1334.8374, 1334.8374, 1351.6090, 1365.5970, 1383.6307, 1434.7792, 1448.8667, 1458.6595, 1475.6919, 1487.6974, 1612.7894, 1618.0076, 1618.0076, 1697.8160, 1697.8160, 1707.7140, 1716.7928, 1732.0361, 1838.8502, 1901.1791, 1993.9021, 2211.0298, 2283.1060, 2398.9456

6. [A0A4W2D408](#) Mass: 180682 Score: 85 Expect: 0.00046 Matches: 18

Complement C3 OS=Bos indicus x Bos taurus OX=30522 GN=C3 PE=4 SV=1

| Observed  | Mr(expt)  | Mr(calc)  | ppm    | Start | End | Miss | Ions | Peptide                       |
|-----------|-----------|-----------|--------|-------|-----|------|------|-------------------------------|
| 833.4543  | 832.4470  | 832.4807  | -40.43 | 803   | -   | 809  | 0    | R.LPYSVVR.N                   |
| 833.4543  | 832.4471  | 832.4807  | -40.37 | 803   | -   | 809  | 0    | R.LPYSVVR.N                   |
| 848.4947  | 847.4874  | 847.4400  | 56.0   | 1368  | -   | 1375 | 0    | K.TLSTGVDR.Y                  |
| 850.5049  | 849.4976  | 849.4266  | 83.6   | 639   | -   | 645  | 0    | R.SVQLMEK.R + Oxidation (M)   |
| 864.5046  | 863.4973  | 863.4939  | 3.99   | 758   | -   | 764  | 0    | K.LMNVFLK.D                   |
| 887.4306  | 886.4233  | 886.4508  | -31.02 | 810   | -   | 816  | 0    | R.NEQVEIR.A                   |
| 912.4536  | 911.4463  | 911.4865  | -44.04 | 817   | -   | 823  | 0    | R.AILYNYR.E                   |
| 912.4536  | 911.4463  | 911.4865  | -44.03 | 817   | -   | 823  | 0    | R.AILYNYR.E                   |
| 996.5558  | 995.5485  | 995.4672  | 81.7   | 650   | -   | 658  | 0    | K.AGQYSSDLR.K                 |
| 1090.4866 | 1089.4793 | 1089.4873 | -7.34  | 590   | -   | 600  | 0    | K.ADIGCTPGSGR.N               |
| 1164.6057 | 1163.5984 | 1163.6411 | -36.67 | 850   | -   | 859  | 0    | R.HQQTITIPAR.S                |
| 1349.6270 | 1348.6197 | 1348.6809 | -45.38 | 678   | -   | 689  | 0    | R.AQFILQGDACVK.A              |
| 1420.6680 | 1419.6607 | 1419.7147 | -37.99 | 882   | -   | 894  | 0    | K.AAVYNHFISDGVK.K             |
| 1427.7352 | 1426.7279 | 1426.6625 | 45.9   | 487   | -   | 497  | 1    | R.YITYMIMNKGL + Oxidation (M) |
| 1796.8849 | 1795.8776 | 1795.9178 | -22.39 | 832   | -   | 847  | 0    | R.VELLYNPAPFCSLATAK.K         |
| 1977.9272 | 1976.9199 | 1976.9884 | -34.62 | 732   | -   | 747  | 0    | R.SQFPESLWLTVIDLK.Q           |
| 2052.0193 | 2051.0120 | 2051.0874 | -36.73 | 830   | -   | 847  | 1    | K.VRVVELLYNPAPFCSLATAK.K      |
| 2488.1152 | 2487.1079 | 2487.1814 | -29.56 | 782   | -   | 802  | 0    | K.GICVADPYEVTVMQDFFIDLR.L     |

No match to: 842.4758, 853.4832, 855.4396, 865.9906, 868.5154, 868.5154, 870.5118, 877.0043, 882.5307, 882.5307, 892.9702, 951.5852, 969.4808, 973.4983, 1017.6315, 1017.6315, 1019.6440, 1033.6599, 1045.5276, 1051.6682, 1051.6682, 1066.4620, 1131.6697, 1151.6833, 1157.5516, 1165.6611, 1165.6611, 1179.5520, 1193.5681, 1277.6617, 1277.6617, 1300.8000, 1307.6257, 1307.6257, 1320.5388, 1334.8374, 1334.8374, 1351.6090, 1365.5970, 1383.6307, 1434.7792, 1448.8667, 1458.6595, 1475.6919, 1487.6974, 1612.7894, 1618.0076, 1618.0076, 1697.8160, 1697.8160, 1707.7140, 1716.7928, 1732.0361, 1838.8502, 1901.1791, 1993.9021, 2211.0298, 2283.1060, 2398.9456

7. [A0A4W2HFJ5](#) Mass: 188690 Score: 85 Expect: 0.00047 Matches: 18

Complement C3 OS=Bos indicus x Bos taurus OX=30522 GN=C3 PE=4 SV=1

| Observed  | Mr(expt)  | Mr(calc)  | ppm    | Start | End | Miss | Ions | Peptide                       |
|-----------|-----------|-----------|--------|-------|-----|------|------|-------------------------------|
| 833.4543  | 832.4470  | 832.4807  | -40.43 | 834   | -   | 840  | 0    | R.LPYSVVR.N                   |
| 833.4543  | 832.4471  | 832.4807  | -40.37 | 834   | -   | 840  | 0    | R.LPYSVVR.N                   |
| 848.4947  | 847.4874  | 847.4400  | 56.0   | 1419  | -   | 1426 | 0    | K.TLSTGVDR.Y                  |
| 850.5049  | 849.4976  | 849.4266  | 83.6   | 670   | -   | 676  | 0    | R.SVQLMEK.R + Oxidation (M)   |
| 864.5046  | 863.4973  | 863.4939  | 3.99   | 789   | -   | 795  | 0    | K.LMNVFLK.D                   |
| 887.4306  | 886.4233  | 886.4508  | -31.02 | 841   | -   | 847  | 0    | R.NEQVEIR.A                   |
| 912.4536  | 911.4463  | 911.4865  | -44.04 | 848   | -   | 854  | 0    | R.AILYNYR.E                   |
| 912.4536  | 911.4463  | 911.4865  | -44.03 | 848   | -   | 854  | 0    | R.AILYNYR.E                   |
| 996.5558  | 995.5485  | 995.4672  | 81.7   | 681   | -   | 689  | 0    | K.AGQYSSDLR.K                 |
| 1090.4866 | 1089.4793 | 1089.4873 | -7.34  | 621   | -   | 631  | 0    | K.ADIGCTPGSGR.N               |
| 1164.6057 | 1163.5984 | 1163.6411 | -36.67 | 881   | -   | 890  | 0    | R.HQQTITIPAR.S                |
| 1349.6270 | 1348.6197 | 1348.6809 | -45.38 | 709   | -   | 720  | 0    | R.AQFILQGDACVK.A              |
| 1420.6680 | 1419.6607 | 1419.7147 | -37.99 | 913   | -   | 925  | 0    | K.AAVYNHFISDGVK.K             |
| 1427.7352 | 1426.7279 | 1426.6625 | 45.9   | 487   | -   | 497  | 1    | R.YITYMIMNKGL + Oxidation (M) |
| 1796.8849 | 1795.8776 | 1795.9178 | -22.39 | 863   | -   | 878  | 0    | R.VELLYNPAPFCSLATAK.K         |
| 1977.9272 | 1976.9199 | 1976.9884 | -34.62 | 763   | -   | 778  | 0    | R.SQFPESLWLTVIDLK.Q           |
| 2052.0193 | 2051.0120 | 2051.0874 | -36.73 | 861   | -   | 878  | 1    | K.VRVVELLYNPAPFCSLATAK.K      |
| 2488.1152 | 2487.1079 | 2487.1814 | -29.56 | 813   | -   | 833  | 0    | K.GICVADPYEVTVMQDFFIDLR.L     |

No match to: 842.4758, 853.4832, 855.4396, 865.9906, 868.5154, 868.5154, 870.5118, 877.0043, 882.5307, 882.5307, 892.9702, 951.5852, 969.4808, 973.4983, 1017.6315, 1017.6315, 1019.6440, 1033.6599, 1045.5276, 1051.6682, 1051.6682, 1066.4620, 1131.6697, 1151.6833, 1157.5516, 1165.6611, 1165.6611, 1179.5520, 1193.5681, 1277.6617, 1277.6617, 1300.8000, 1307.6257, 1307.6257, 1320.5388, 1334.8374, 1334.8374, 1351.6090, 1365.5970, 1383.6307, 1434.7792, 1448.8667, 1458.6595, 1475.6919, 1487.6974, 1612.7894, 1618.0076, 1618.0076, 1697.8160, 1697.8160, 1707.7140, 1716.7928, 1732.0361, 1838.8502, 1901.1791, 1993.9021, 2211.0298, 2283.1060, 2398.9456

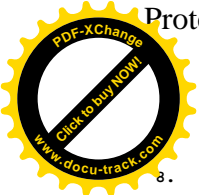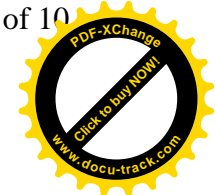

8.

**Q2UVX4** Mass: 188675 Score: 85 Expect: 0.00047 Matches: 18

Complement C3 OS=Bos taurus OX=9913 GN=C3 PE=1 SV=2

| Observed  | Mr(expt)  | Mr(calc)  | ppm    | Start | End | Miss | Ions | Peptide                         |
|-----------|-----------|-----------|--------|-------|-----|------|------|---------------------------------|
| 833.4543  | 832.4470  | 832.4807  | -40.43 | 834   | -   | 840  | 0    | R.LPYSVVR.N                     |
| 833.4543  | 832.4471  | 832.4807  | -40.37 | 834   | -   | 840  | 0    | 29 R.LPYSVVR.N                  |
| 848.4947  | 847.4874  | 847.4400  | 56.0   | 1419  | -   | 1426 | 0    | K.TLSTGVDR.Y                    |
| 850.5049  | 849.4976  | 849.4266  | 83.6   | 670   | -   | 676  | 0    | R.SVQLMEK.R + Oxidation (M)     |
| 864.5046  | 863.4973  | 863.4939  | 3.99   | 789   | -   | 795  | 0    | K.LMNVFLK.D                     |
| 887.4306  | 886.4233  | 886.4508  | -31.02 | 841   | -   | 847  | 0    | R.NEQVEIR.A                     |
| 912.4536  | 911.4463  | 911.4865  | -44.04 | 848   | -   | 854  | 0    | R.AILYNYR.E                     |
| 912.4536  | 911.4463  | 911.4865  | -44.03 | 848   | -   | 854  | 0    | 28 R.AILYNYR.E                  |
| 996.5558  | 995.5485  | 995.4672  | 81.7   | 681   | -   | 689  | 0    | K.AGQYSSDLR.K                   |
| 1090.4866 | 1089.4793 | 1089.4873 | -7.34  | 621   | -   | 631  | 0    | K.ADIGCTPGSGR.N                 |
| 1164.6057 | 1163.5984 | 1163.6411 | -36.67 | 881   | -   | 890  | 0    | R.HQQTITIPAR.S                  |
| 1349.6270 | 1348.6197 | 1348.6809 | -45.38 | 709   | -   | 720  | 0    | R.AQFILQGDACVK.A                |
| 1420.6680 | 1419.6607 | 1419.7147 | -37.99 | 913   | -   | 925  | 0    | K.AAVYNHFISDGVK.K               |
| 1427.7352 | 1426.7279 | 1426.6625 | 45.9   | 487   | -   | 497  | 1    | R.YITYMIMNKGK.L + Oxidation (M) |
| 1796.8849 | 1795.8776 | 1795.9178 | -22.39 | 863   | -   | 878  | 0    | R.VELLYNPAFCSLATAK.K            |
| 1977.9272 | 1976.9199 | 1976.9884 | -34.62 | 763   | -   | 778  | 0    | R.SQFPESWLWTVIDLK.Q             |
| 2052.0193 | 2051.0120 | 2051.0874 | -36.73 | 861   | -   | 878  | 1    | K.VRVELLYNPAFCSLATAK.K          |
| 2488.1152 | 2487.1079 | 2487.1814 | -29.56 | 813   | -   | 833  | 0    | K.GICVADPYEVTVMQDFFIDLR.L       |

No match to: 842.4758, 853.4832, 855.4396, 865.9906, 868.5154, 868.5154, 870.5118, 877.0043, 882.5307, 882.5307, 892.9702, 951.5852, 969.4808, 973.4983, 1017.6315, 1017.6315, 1019.6440, 1033.6599, 1045.5276, 1051.6682, 1051.6682, 1066.4620, 1131.6697, 1151.6833, 1157.5516, 1165.6611, 1165.6611, 1179.5520, 1193.5681, 1277.6617, 1277.6617, 1300.8000, 1307.6257, 1307.6257, 1320.5388, 1334.8374, 1334.8374, 1351.6090, 1365.5970, 1383.6307, 1434.7792, 1448.8667, 1458.6595, 1475.6919, 1487.6974, 1612.7894, 1618.0076, 1618.0076, 1697.8160, 1697.8160, 1707.7140, 1716.7928, 1732.0361, 1838.8502, 1901.1791, 1993.9021, 2211.0298, 2283.1060, 2398.9456

9.

**AOA4W2D406** Mass: 186684 Score: 84 Expect: 0.00056 Matches: 18

Complement C3 OS=Bos indicus x Bos taurus OX=30522 GN=C3 PE=4 SV=1

| Observed  | Mr(expt)  | Mr(calc)  | ppm    | Start | End | Miss | Ions | Peptide                         |
|-----------|-----------|-----------|--------|-------|-----|------|------|---------------------------------|
| 833.4543  | 832.4470  | 832.4807  | -40.43 | 837   | -   | 843  | 0    | R.LPYSVVR.N                     |
| 833.4543  | 832.4471  | 832.4807  | -40.37 | 837   | -   | 843  | 0    | 29 R.LPYSVVR.N                  |
| 848.4947  | 847.4874  | 847.4400  | 56.0   | 1422  | -   | 1429 | 0    | K.TLSTGVDR.Y                    |
| 850.5049  | 849.4976  | 849.4266  | 83.6   | 673   | -   | 679  | 0    | R.SVQLMEK.R + Oxidation (M)     |
| 864.5046  | 863.4973  | 863.4939  | 3.99   | 792   | -   | 798  | 0    | K.LMNVFLK.D                     |
| 887.4306  | 886.4233  | 886.4508  | -31.02 | 844   | -   | 850  | 0    | R.NEQVEIR.A                     |
| 912.4536  | 911.4463  | 911.4865  | -44.04 | 851   | -   | 857  | 0    | R.AILYNYR.E                     |
| 912.4536  | 911.4463  | 911.4865  | -44.03 | 851   | -   | 857  | 0    | 28 R.AILYNYR.E                  |
| 996.5558  | 995.5485  | 995.4672  | 81.7   | 684   | -   | 692  | 0    | K.AGQYSSDLR.K                   |
| 1090.4866 | 1089.4793 | 1089.4873 | -7.34  | 624   | -   | 634  | 0    | K.ADIGCTPGSGR.N                 |
| 1164.6057 | 1163.5984 | 1163.6411 | -36.67 | 884   | -   | 893  | 0    | R.HQQTITIPAR.S                  |
| 1349.6270 | 1348.6197 | 1348.6809 | -45.38 | 712   | -   | 723  | 0    | R.AQFILQGDACVK.A                |
| 1420.6680 | 1419.6607 | 1419.7147 | -37.99 | 916   | -   | 928  | 0    | K.AAVYNHFISDGVK.K               |
| 1427.7352 | 1426.7279 | 1426.6625 | 45.9   | 521   | -   | 531  | 1    | R.YITYMIMNKGK.L + Oxidation (M) |
| 1796.8849 | 1795.8776 | 1795.9178 | -22.39 | 866   | -   | 881  | 0    | R.VELLYNPAFCSLATAK.K            |
| 1977.9272 | 1976.9199 | 1976.9884 | -34.62 | 766   | -   | 781  | 0    | R.SQFPESWLWTVIDLK.Q             |
| 2052.0193 | 2051.0120 | 2051.0874 | -36.73 | 864   | -   | 881  | 1    | K.VRVELLYNPAFCSLATAK.K          |
| 2488.1152 | 2487.1079 | 2487.1814 | -29.56 | 816   | -   | 836  | 0    | K.GICVADPYEVTVMQDFFIDLR.L       |

No match to: 842.4758, 853.4832, 855.4396, 865.9906, 868.5154, 868.5154, 870.5118, 877.0043, 882.5307, 882.5307, 892.9702, 951.5852, 969.4808, 973.4983, 1017.6315, 1017.6315, 1019.6440, 1033.6599, 1045.5276, 1051.6682, 1051.6682, 1066.4620, 1131.6697, 1151.6833, 1157.5516, 1165.6611, 1165.6611, 1179.5520, 1193.5681, 1277.6617, 1277.6617, 1300.8000, 1307.6257, 1307.6257, 1320.5388, 1334.8374, 1334.8374, 1351.6090, 1365.5970, 1383.6307, 1434.7792, 1448.8667, 1458.6595, 1475.6919, 1487.6974, 1612.7894, 1618.0076, 1618.0076, 1697.8160, 1697.8160, 1707.7140, 1716.7928, 1732.0361, 1838.8502, 1901.1791, 1993.9021, 2211.0298, 2283.1060, 2398.9456

10.

**AOA3Q1MGTO** Mass: 183008 Score: 84 Expect: 0.00056 Matches: 18

Complement C3 OS=Bos taurus OX=9913 GN=C3 PE=1 SV=1

| Observed  | Mr(expt)  | Mr(calc)  | ppm    | Start | End | Miss | Ions | Peptide                         |
|-----------|-----------|-----------|--------|-------|-----|------|------|---------------------------------|
| 833.4543  | 832.4470  | 832.4807  | -40.43 | 803   | -   | 809  | 0    | R.LPYSVVR.N                     |
| 833.4543  | 832.4471  | 832.4807  | -40.37 | 803   | -   | 809  | 0    | 29 R.LPYSVVR.N                  |
| 848.4947  | 847.4874  | 847.4400  | 56.0   | 1368  | -   | 1375 | 0    | K.TLSTGVDR.Y                    |
| 850.5049  | 849.4976  | 849.4266  | 83.6   | 639   | -   | 645  | 0    | R.SVQLMEK.R + Oxidation (M)     |
| 864.5046  | 863.4973  | 863.4939  | 3.99   | 758   | -   | 764  | 0    | K.LMNVFLK.D                     |
| 887.4306  | 886.4233  | 886.4508  | -31.02 | 810   | -   | 816  | 0    | R.NEQVEIR.A                     |
| 912.4536  | 911.4463  | 911.4865  | -44.04 | 817   | -   | 823  | 0    | R.AILYNYR.E                     |
| 912.4536  | 911.4463  | 911.4865  | -44.03 | 817   | -   | 823  | 0    | 28 R.AILYNYR.E                  |
| 996.5558  | 995.5485  | 995.4672  | 81.7   | 650   | -   | 658  | 0    | K.AGQYSSDLR.K                   |
| 1090.4866 | 1089.4793 | 1089.4873 | -7.34  | 590   | -   | 600  | 0    | K.ADIGCTPGSGR.N                 |
| 1164.6057 | 1163.5984 | 1163.6411 | -36.67 | 850   | -   | 859  | 0    | R.HQQTITIPAR.S                  |
| 1349.6270 | 1348.6197 | 1348.6809 | -45.38 | 678   | -   | 689  | 0    | R.AQFILQGDACVK.A                |
| 1420.6680 | 1419.6607 | 1419.7147 | -37.99 | 882   | -   | 894  | 0    | K.AAVYNHFISDGVK.K               |
| 1427.7352 | 1426.7279 | 1426.6625 | 45.9   | 487   | -   | 497  | 1    | R.YITYMIMNKGK.L + Oxidation (M) |
| 1796.8849 | 1795.8776 | 1795.9178 | -22.39 | 832   | -   | 847  | 0    | R.VELLYNPAFCSLATAK.K            |
| 1977.9272 | 1976.9199 | 1976.9884 | -34.62 | 732   | -   | 747  | 0    | R.SQFPESWLWTVIDLK.Q             |
| 2052.0193 | 2051.0120 | 2051.0874 | -36.73 | 830   | -   | 847  | 1    | K.VRVELLYNPAFCSLATAK.K          |
| 2488.1152 | 2487.1079 | 2487.1814 | -29.56 | 782   | -   | 802  | 0    | K.GICVADPYEVTVMQDFFIDLR.L       |

No match to: 842.4758, 853.4832, 855.4396, 865.9906, 868.5154, 868.5154, 870.5118, 877.0043, 882.5307, 882.5307, 892.9702, 951.5852, 969.4808, 973.4983, 1017.6315, 1017.6315, 1019.6440, 1033.6599, 1045.5276, 1051.6682, 1051.6682, 1066.4620, 1131.6697, 1151.6833, 1157.5516, 1165.6611, 1165.6611, 1179.5520, 1193.5681, 1277.6617, 1277.6617, 1300.8000, 1307.6257, 1307.6257, 1320.5388, 1334.8374, 1334.8374, 1351.6090, 1365.5970, 1383.6307, 1434.7792, 1448.8667, 1458.6595, 1475.6919, 1487.6974, 1612.7894, 1618.0076, 1618.0076, 1697.8160, 1697.8160, 1707.7140, 1716.7928, 1732.0361, 1838.8502, 1901.1791, 1993.9021, 2211.0298, 2283.1060, 2398.9456

11.

**AOA4W2D3Y9** Mass: 185555 Score: 84 Expect: 0.0006 Matches: 18

Complement C3 OS=Bos indicus x Bos taurus OX=30522 GN=C3 PE=4 SV=1

| Observed | Mr(expt) | Mr(calc) | ppm    | Start | End | Miss | Ions | Peptide        |
|----------|----------|----------|--------|-------|-----|------|------|----------------|
| 833.4543 | 832.4470 | 832.4807 | -40.43 | 837   | -   | 843  | 0    | R.LPYSVVR.N    |
| 833.4543 | 832.4471 | 832.4807 | -40.37 | 837   | -   | 843  | 0    | 29 R.LPYSVVR.N |

|                                                                                                                                                                                                                                                                                                                                                                                                                                                                                                                                                                                                                                                                        |           |           |        |      |   |      |   |     |                                 |
|------------------------------------------------------------------------------------------------------------------------------------------------------------------------------------------------------------------------------------------------------------------------------------------------------------------------------------------------------------------------------------------------------------------------------------------------------------------------------------------------------------------------------------------------------------------------------------------------------------------------------------------------------------------------|-----------|-----------|--------|------|---|------|---|-----|---------------------------------|
| 848.4947                                                                                                                                                                                                                                                                                                                                                                                                                                                                                                                                                                                                                                                               | 847.4874  | 847.4400  | 56.0   | 1422 | - | 1429 | 0 | --- | K.TLSTGVDR.Y                    |
| 850.5049                                                                                                                                                                                                                                                                                                                                                                                                                                                                                                                                                                                                                                                               | 849.4976  | 849.4266  | 83.6   | 673  | - | 679  | 0 | --- | R.SVQLMEK.R + Oxidation (M)     |
| 864.5046                                                                                                                                                                                                                                                                                                                                                                                                                                                                                                                                                                                                                                                               | 863.4973  | 863.4939  | 3.99   | 792  | - | 798  | 0 | --- | K.LMNVFLK.D                     |
| 887.4306                                                                                                                                                                                                                                                                                                                                                                                                                                                                                                                                                                                                                                                               | 886.4233  | 886.4508  | -31.02 | 844  | - | 850  | 0 | --- | R.NEQVEIR.A                     |
| 912.4536                                                                                                                                                                                                                                                                                                                                                                                                                                                                                                                                                                                                                                                               | 911.4463  | 911.4865  | -44.04 | 851  | - | 857  | 0 | --- | R.AILYNYR.E                     |
| 912.4536                                                                                                                                                                                                                                                                                                                                                                                                                                                                                                                                                                                                                                                               | 911.4463  | 911.4865  | -44.03 | 851  | - | 857  | 0 | 28  | R.AILYNYR.E                     |
| 996.5558                                                                                                                                                                                                                                                                                                                                                                                                                                                                                                                                                                                                                                                               | 995.5485  | 995.4672  | 81.7   | 684  | - | 692  | 0 | --- | K.AGQYSSDLR.K                   |
| 1090.4866                                                                                                                                                                                                                                                                                                                                                                                                                                                                                                                                                                                                                                                              | 1089.4793 | 1089.4873 | -7.34  | 624  | - | 634  | 0 | --- | K.ADIGCTPGSGR.N                 |
| 1164.6057                                                                                                                                                                                                                                                                                                                                                                                                                                                                                                                                                                                                                                                              | 1163.5984 | 1163.6411 | -36.67 | 884  | - | 893  | 0 | --- | R.HQQTITIPAR.S                  |
| 1349.6270                                                                                                                                                                                                                                                                                                                                                                                                                                                                                                                                                                                                                                                              | 1348.6197 | 1348.6809 | -45.38 | 712  | - | 723  | 0 | --- | R.AQFILQGDACVK.A                |
| 1420.6680                                                                                                                                                                                                                                                                                                                                                                                                                                                                                                                                                                                                                                                              | 1419.6607 | 1419.7147 | -37.99 | 916  | - | 928  | 0 | --- | K.AAVYNHFISDGVK.K               |
| 1427.7352                                                                                                                                                                                                                                                                                                                                                                                                                                                                                                                                                                                                                                                              | 1426.7279 | 1426.6625 | 45.9   | 521  | - | 531  | 1 | --- | R.YITYMIMNKGK.L + Oxidation (M) |
| 1796.8849                                                                                                                                                                                                                                                                                                                                                                                                                                                                                                                                                                                                                                                              | 1795.8776 | 1795.9178 | -22.39 | 866  | - | 881  | 0 | --- | R.VELLYNPAFCSLATAK.K            |
| 1977.9272                                                                                                                                                                                                                                                                                                                                                                                                                                                                                                                                                                                                                                                              | 1976.9199 | 1976.9884 | -34.62 | 766  | - | 781  | 0 | --- | R.SQFPESWLWTVIDLK.Q             |
| 2052.0193                                                                                                                                                                                                                                                                                                                                                                                                                                                                                                                                                                                                                                                              | 2051.0120 | 2051.0874 | -36.73 | 864  | - | 881  | 1 | --- | K.VRVELLYNPAFCSLATAK.K          |
| 2488.1152                                                                                                                                                                                                                                                                                                                                                                                                                                                                                                                                                                                                                                                              | 2487.1079 | 2487.1814 | -29.56 | 816  | - | 836  | 0 | --- | K.GICVADPYEVTVMQDFFIDLR.L       |
| No match to: 842.4758, 853.4832, 855.4396, 865.9906, 868.5154, 868.5154, 870.5118, 877.0043, 882.5307, 882.5307, 892.9702, 951.5852, 969.4808, 973.4983, 1017.6315, 1017.6315, 1019.6440, 1033.6599, 1045.5276, 1051.6682, 1051.6682, 1066.4620, 1131.6697, 1151.6833, 1157.5516, 1165.6611, 1165.6611, 1179.5520, 1193.5681, 1277.6617, 1277.6617, 1300.8000, 1307.6257, 1307.6257, 1320.5388, 1334.8374, 1334.8374, 1351.6090, 1365.5970, 1383.6307, 1434.7792, 1448.8667, 1458.6595, 1475.6919, 1487.6974, 1612.7894, 1618.0076, 1618.0076, 1697.8160, 1697.8160, 1707.7140, 1716.7928, 1732.0361, 1838.8502, 1901.1791, 1993.9021, 2211.0298, 2283.1060, 2398.9456 |           |           |        |      |   |      |   |     |                                 |

12. AOA3Q1M2B2 Mass: 185169 Score: 83 Expect: 0.00072 Matches: 18

|                                                                                                                                                                                                                                                                                                                                                                                                                                                                                                                                                                                                                                                                        |           |           |        |         |       |      |      |         |                                 |
|------------------------------------------------------------------------------------------------------------------------------------------------------------------------------------------------------------------------------------------------------------------------------------------------------------------------------------------------------------------------------------------------------------------------------------------------------------------------------------------------------------------------------------------------------------------------------------------------------------------------------------------------------------------------|-----------|-----------|--------|---------|-------|------|------|---------|---------------------------------|
| Complement                                                                                                                                                                                                                                                                                                                                                                                                                                                                                                                                                                                                                                                             | C3        | OS=Bos    | taurus | OX=9913 | GN=C3 | PE=1 | SV=1 |         |                                 |
| Observed                                                                                                                                                                                                                                                                                                                                                                                                                                                                                                                                                                                                                                                               | Mr(expt)  | Mr(calc)  | ppm    | Start   | End   | Miss | Ions | Peptide |                                 |
| 833.4543                                                                                                                                                                                                                                                                                                                                                                                                                                                                                                                                                                                                                                                               | 832.4470  | 832.4807  | -40.43 | 803     | -     | 809  | 0    | ---     | R.LPYSVVR.N                     |
| 833.4543                                                                                                                                                                                                                                                                                                                                                                                                                                                                                                                                                                                                                                                               | 832.4471  | 832.4807  | -40.37 | 803     | -     | 809  | 0    | 29      | R.LPYSVVR.N                     |
| 848.4947                                                                                                                                                                                                                                                                                                                                                                                                                                                                                                                                                                                                                                                               | 847.4874  | 847.4400  | 56.0   | 1388    | -     | 1395 | 0    | ---     | K.TLSTGVDR.Y                    |
| 850.5049                                                                                                                                                                                                                                                                                                                                                                                                                                                                                                                                                                                                                                                               | 849.4976  | 849.4266  | 83.6   | 639     | -     | 645  | 0    | ---     | R.SVQLMEK.R + Oxidation (M)     |
| 864.5046                                                                                                                                                                                                                                                                                                                                                                                                                                                                                                                                                                                                                                                               | 863.4973  | 863.4939  | 3.99   | 758     | -     | 764  | 0    | ---     | K.LMNVFLK.D                     |
| 887.4306                                                                                                                                                                                                                                                                                                                                                                                                                                                                                                                                                                                                                                                               | 886.4233  | 886.4508  | -31.02 | 810     | -     | 816  | 0    | ---     | R.NEQVEIR.A                     |
| 912.4536                                                                                                                                                                                                                                                                                                                                                                                                                                                                                                                                                                                                                                                               | 911.4463  | 911.4865  | -44.04 | 817     | -     | 823  | 0    | ---     | R.AILYNYR.E                     |
| 912.4536                                                                                                                                                                                                                                                                                                                                                                                                                                                                                                                                                                                                                                                               | 911.4463  | 911.4865  | -44.03 | 817     | -     | 823  | 0    | 28      | R.AILYNYR.E                     |
| 996.5558                                                                                                                                                                                                                                                                                                                                                                                                                                                                                                                                                                                                                                                               | 995.5485  | 995.4672  | 81.7   | 650     | -     | 658  | 0    | ---     | K.AGQYSSDLR.K                   |
| 1090.4866                                                                                                                                                                                                                                                                                                                                                                                                                                                                                                                                                                                                                                                              | 1089.4793 | 1089.4873 | -7.34  | 590     | -     | 600  | 0    | ---     | K.ADIGCTPGSGR.N                 |
| 1164.6057                                                                                                                                                                                                                                                                                                                                                                                                                                                                                                                                                                                                                                                              | 1163.5984 | 1163.6411 | -36.67 | 850     | -     | 859  | 0    | ---     | R.HQQTITIPAR.S                  |
| 1349.6270                                                                                                                                                                                                                                                                                                                                                                                                                                                                                                                                                                                                                                                              | 1348.6197 | 1348.6809 | -45.38 | 678     | -     | 689  | 0    | ---     | R.AQFILQGDACVK.A                |
| 1420.6680                                                                                                                                                                                                                                                                                                                                                                                                                                                                                                                                                                                                                                                              | 1419.6607 | 1419.7147 | -37.99 | 882     | -     | 894  | 0    | ---     | K.AAVYNHFISDGVK.K               |
| 1427.7352                                                                                                                                                                                                                                                                                                                                                                                                                                                                                                                                                                                                                                                              | 1426.7279 | 1426.6625 | 45.9   | 487     | -     | 497  | 1    | ---     | R.YITYMIMNKGK.L + Oxidation (M) |
| 1796.8849                                                                                                                                                                                                                                                                                                                                                                                                                                                                                                                                                                                                                                                              | 1795.8776 | 1795.9178 | -22.39 | 832     | -     | 847  | 0    | ---     | R.VELLYNPAFCSLATAK.K            |
| 1977.9272                                                                                                                                                                                                                                                                                                                                                                                                                                                                                                                                                                                                                                                              | 1976.9199 | 1976.9884 | -34.62 | 732     | -     | 747  | 0    | ---     | R.SQFPESWLWTVIDLK.Q             |
| 2052.0193                                                                                                                                                                                                                                                                                                                                                                                                                                                                                                                                                                                                                                                              | 2051.0120 | 2051.0874 | -36.73 | 830     | -     | 847  | 1    | ---     | K.VRVELLYNPAFCSLATAK.K          |
| 2488.1152                                                                                                                                                                                                                                                                                                                                                                                                                                                                                                                                                                                                                                                              | 2487.1079 | 2487.1814 | -29.56 | 782     | -     | 802  | 0    | ---     | K.GICVADPYEVTVMQDFFIDLR.L       |
| No match to: 842.4758, 853.4832, 855.4396, 865.9906, 868.5154, 868.5154, 870.5118, 877.0043, 882.5307, 882.5307, 892.9702, 951.5852, 969.4808, 973.4983, 1017.6315, 1017.6315, 1019.6440, 1033.6599, 1045.5276, 1051.6682, 1051.6682, 1066.4620, 1131.6697, 1151.6833, 1157.5516, 1165.6611, 1165.6611, 1179.5520, 1193.5681, 1277.6617, 1277.6617, 1300.8000, 1307.6257, 1307.6257, 1320.5388, 1334.8374, 1334.8374, 1351.6090, 1365.5970, 1383.6307, 1434.7792, 1448.8667, 1458.6595, 1475.6919, 1487.6974, 1612.7894, 1618.0076, 1618.0076, 1697.8160, 1697.8160, 1707.7140, 1716.7928, 1732.0361, 1838.8502, 1901.1791, 1993.9021, 2211.0298, 2283.1060, 2398.9456 |           |           |        |         |       |      |      |         |                                 |

13. AOA0F6QNP7 Mass: 188604 Score: 83 Expect: 0.00074 Matches: 18

|                                                                                                                                                                                                                                                                                                                                                                                                                                                                                                                                                                                                                                                                                  |           |           |        |        |         |       |      |         |                                 |  |
|----------------------------------------------------------------------------------------------------------------------------------------------------------------------------------------------------------------------------------------------------------------------------------------------------------------------------------------------------------------------------------------------------------------------------------------------------------------------------------------------------------------------------------------------------------------------------------------------------------------------------------------------------------------------------------|-----------|-----------|--------|--------|---------|-------|------|---------|---------------------------------|--|
| Complement                                                                                                                                                                                                                                                                                                                                                                                                                                                                                                                                                                                                                                                                       | component | 3         | OS=Bos | taurus | OX=9913 | GN=C3 | PE=2 | SV=1    |                                 |  |
| Observed                                                                                                                                                                                                                                                                                                                                                                                                                                                                                                                                                                                                                                                                         | Mr(expt)  | Mr(calc)  | ppm    | Start  | End     | Miss  | Ions | Peptide |                                 |  |
| 833.4543                                                                                                                                                                                                                                                                                                                                                                                                                                                                                                                                                                                                                                                                         | 832.4470  | 832.4807  | -40.43 | 834    | -       | 840   | 0    | ---     | R.LPYSVVR.N                     |  |
| 833.4543                                                                                                                                                                                                                                                                                                                                                                                                                                                                                                                                                                                                                                                                         | 832.4471  | 832.4807  | -40.37 | 834    | -       | 840   | 0    | 29      | R.LPYSVVR.N                     |  |
| 848.4947                                                                                                                                                                                                                                                                                                                                                                                                                                                                                                                                                                                                                                                                         | 847.4874  | 847.4400  | 56.0   | 1419   | -       | 1426  | 0    | ---     | K.TLSTGVDR.Y                    |  |
| 850.5049                                                                                                                                                                                                                                                                                                                                                                                                                                                                                                                                                                                                                                                                         | 849.4976  | 849.4266  | 83.6   | 670    | -       | 676   | 0    | ---     | R.SVQLMEK.R + Oxidation (M)     |  |
| 853.4832                                                                                                                                                                                                                                                                                                                                                                                                                                                                                                                                                                                                                                                                         | 852.4759  | 852.4779  | -2.32  | 789    | -       | 795   | 0    | ---     | K.LMSVFLK.D + Oxidation (M)     |  |
| 887.4306                                                                                                                                                                                                                                                                                                                                                                                                                                                                                                                                                                                                                                                                         | 886.4233  | 886.4508  | -31.02 | 841    | -       | 847   | 0    | ---     | R.NEQVEIR.A                     |  |
| 912.4536                                                                                                                                                                                                                                                                                                                                                                                                                                                                                                                                                                                                                                                                         | 911.4463  | 911.4865  | -44.04 | 848    | -       | 854   | 0    | ---     | R.AILYNYR.E                     |  |
| 912.4536                                                                                                                                                                                                                                                                                                                                                                                                                                                                                                                                                                                                                                                                         | 911.4463  | 911.4865  | -44.03 | 848    | -       | 854   | 0    | 28      | R.AILYNYR.E                     |  |
| 996.5558                                                                                                                                                                                                                                                                                                                                                                                                                                                                                                                                                                                                                                                                         | 995.5485  | 995.4672  | 81.7   | 681    | -       | 689   | 0    | ---     | K.AGQYSSDLR.K                   |  |
| 1090.4866                                                                                                                                                                                                                                                                                                                                                                                                                                                                                                                                                                                                                                                                        | 1089.4793 | 1089.4873 | -7.34  | 621    | -       | 631   | 0    | ---     | K.ADIGCTPGSGR.N                 |  |
| 1164.6057                                                                                                                                                                                                                                                                                                                                                                                                                                                                                                                                                                                                                                                                        | 1163.5984 | 1163.6411 | -36.67 | 881    | -       | 890   | 0    | ---     | R.HQQTITIPAR.S                  |  |
| 1349.6270                                                                                                                                                                                                                                                                                                                                                                                                                                                                                                                                                                                                                                                                        | 1348.6197 | 1348.6809 | -45.38 | 709    | -       | 720   | 0    | ---     | R.AQFILQGDACVK.A                |  |
| 1420.6680                                                                                                                                                                                                                                                                                                                                                                                                                                                                                                                                                                                                                                                                        | 1419.6607 | 1419.7147 | -37.99 | 913    | -       | 925   | 0    | ---     | K.AAVYNHFISDGVK.K               |  |
| 1427.7352                                                                                                                                                                                                                                                                                                                                                                                                                                                                                                                                                                                                                                                                        | 1426.7279 | 1426.6625 | 45.9   | 487    | -       | 497   | 1    | ---     | R.YITYMIMNKGK.L + Oxidation (M) |  |
| 1796.8849                                                                                                                                                                                                                                                                                                                                                                                                                                                                                                                                                                                                                                                                        | 1795.8776 | 1795.9178 | -22.39 | 863    | -       | 878   | 0    | ---     | R.VELLYNPAFCSLATAK.K            |  |
| 1977.9272                                                                                                                                                                                                                                                                                                                                                                                                                                                                                                                                                                                                                                                                        | 1976.9199 | 1976.9884 | -34.62 | 763    | -       | 778   | 0    | ---     | R.SQFPESWLWTVIDLK.Q             |  |
| 2052.0193                                                                                                                                                                                                                                                                                                                                                                                                                                                                                                                                                                                                                                                                        | 2051.0120 | 2051.0874 | -36.73 | 861    | -       | 878   | 1    | ---     | K.VRVELLYNPAFCSLATAK.K          |  |
| 2488.1152                                                                                                                                                                                                                                                                                                                                                                                                                                                                                                                                                                                                                                                                        | 2487.1079 | 2487.1814 | -29.56 | 813    | -       | 833   | 0    | ---     | K.GICVADPYEVTVMQDFFIDLR.L       |  |
| No match to: 842.4758, 853.4832, 855.4396, 864.5046, 865.9906, 868.5154, 868.5154, 870.5118, 877.0043, 882.5307, 882.5307, 892.9702, 951.5852, 969.4808, 973.4983, 1017.6315, 1017.6315, 1019.6440, 1033.6599, 1045.5276, 1051.6682, 1051.6682, 1066.4620, 1131.6697, 1151.6833, 1157.5516, 1165.6611, 1165.6611, 1179.5520, 1193.5681, 1277.6617, 1277.6617, 1300.8000, 1307.6257, 1307.6257, 1320.5388, 1334.8374, 1334.8374, 1351.6090, 1365.5970, 1383.6307, 1434.7792, 1448.8667, 1458.6595, 1475.6919, 1487.6974, 1612.7894, 1618.0076, 1618.0076, 1697.8160, 1697.8160, 1707.7140, 1716.7928, 1732.0361, 1838.8502, 1901.1791, 1993.9021, 2211.0298, 2283.1060, 2398.9456 |           |           |        |        |         |       |      |         |                                 |  |

14. AOA4W2EP15 Mass: 182918 Score: 82 Expect: 0.00077 Matches: 17

|            |          |          |               |        |          |       |      |         |                             |  |
|------------|----------|----------|---------------|--------|----------|-------|------|---------|-----------------------------|--|
| Complement | C3       | OS=Bos   | indicus x Bos | taurus | OX=30522 | GN=C3 | PE=4 | SV=1    |                             |  |
| Observed   | Mr(expt) | Mr(calc) | ppm           | Start  | End      | Miss  | Ions | Peptide |                             |  |
| 833.4543   | 832.4470 | 832.4807 | -40.43        | 834    | -        | 840   | 0    | ---     | R.LPYSVVR.N                 |  |
| 833.4543   | 832.4471 | 832.4807 | -40.37        | 834    | -        | 840   | 0    | 29      | R.LPYSVVR.N                 |  |
| 850.5049   | 849.4976 | 849.4266 | 83.6          | 670    | -        | 676   | 0    | ---     | R.SVQLMEK.R + Oxidation (M) |  |
| 864.5046   | 863.4973 | 863.4939 | 3.99          | 789    | -        | 795   | 0    | ---     | K.LMNVFLK.D                 |  |
| 887.4306   | 886.4233 | 886.4508 | -31.02        | 841    | -        | 847   | 0    | ---     | R.NEQVEIR.A                 |  |
| 912.4536   | 911.4463 | 911.4865 | -44.04        | 848    | -        | 854   | 0    | ---     | R.AILYNYR.E                 |  |
| 912.4536   | 911.4463 | 911.4865 | -44.03        | 848    | -        | 854   | 0    | 28      | R.AILYNYR.E                 |  |
| 996.5558   | 995.5485 | 995.4672 | 81.7          | 681    | -        | 689   | 0    | ---     | K.AGQYSSDLR.K               |  |



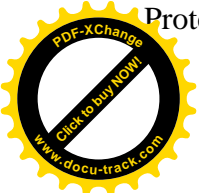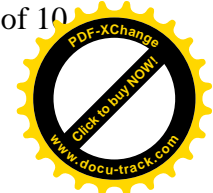

1090.4866 1089.4793 1089.4873 -7.34 621 - 631 0 --- K.ADIGCTPGSGR.N  
 1164.6057 1163.5984 1163.6411 -36.67 881 - 890 0 --- R.HQQTITIPAR.S  
 1349.6270 1348.6197 1348.6809 -45.38 709 - 720 0 --- R.AQFILQGDACVK.A  
 1420.6680 1419.6607 1419.7147 -37.99 913 - 925 0 --- K.AAVYNHFIISDGVK.K  
 1427.7352 1426.7279 1426.6625 45.9 487 - 497 1 --- R.YYTYMIMNKGK.L + Oxidation (M)  
 1796.8849 1795.8776 1795.9178 -22.39 863 - 878 0 --- R.VELLYNPAFCSLATAK.K  
 1977.9272 1976.9199 1976.9884 -34.62 763 - 778 0 --- R.SQFPESWLWTVIDLK.Q  
 2052.0193 2051.0120 2051.0874 -36.73 861 - 878 1 --- K.VRVELLYNPAFCSLATAK.K  
 2488.1152 2487.1079 2487.1814 -29.56 813 - 833 0 --- K.GICVADPYEVTVMQDFFIDL.R

**No match to:** 842.4758, 848.4947, 853.4832, 855.4396, 865.9906, 868.5154, 868.5154, 870.5118, 877.0043, 882.5307, 882.5307, 892.9702, 951.5852, 969.4808, 973.4983, 1017.6315, 1017.6315, 1019.6440, 1033.6599, 1045.5276, 1051.6682, 1051.6682, 1066.4620, 1131.6697, 1151.6833, 1157.5516, 1165.6611, 1165.6611, 1179.5520, 1193.5681, 1277.6617, 1277.6617, 1300.8000, 1307.6257, 1307.6257, 1320.5388, 1334.8374, 1334.8374, 1351.6090, 1365.5970, 1383.6307, 1434.7792, 1448.8667, 1458.6595, 1475.6919, 1487.6974, 1612.7894, 1618.0076, 1618.0076, 1697.8160, 1697.8160, 1707.7140, 1716.7928, 1732.0361, 1838.8502, 1901.1791, 1993.9021, 2211.0298, 2283.1060, 2398.9456

15. [A0A3Q1MHV6](#) Mass: 181738 Score: 81 Expect: 0.0011 Matches: 17

Complement C3 OS=Bos taurus OX=9913 GN=C3 PE=1 SV=1

| Observed  | Mr(expt)  | Mr(calc)  | ppm    | Start | End | Miss | Ions | Peptide                         |
|-----------|-----------|-----------|--------|-------|-----|------|------|---------------------------------|
| 833.4543  | 832.4470  | 832.4807  | -40.43 | 803   | -   | 809  | 0    | R.LPYSVVR.N                     |
| 833.4543  | 832.4471  | 832.4807  | -40.37 | 803   | -   | 809  | 0    | R.LPYSVVR.N                     |
| 850.5049  | 849.4976  | 849.4266  | 83.6   | 639   | -   | 645  | 0    | R.SVQLMEK.R + Oxidation (M)     |
| 864.5046  | 863.4973  | 863.4939  | 3.99   | 758   | -   | 764  | 0    | K.LMNVFLK.D                     |
| 887.4306  | 886.4233  | 886.4508  | -31.02 | 810   | -   | 816  | 0    | R.NEQVEIR.A                     |
| 912.4536  | 911.4463  | 911.4865  | -44.04 | 817   | -   | 823  | 0    | R.AILYNYR.E                     |
| 912.4536  | 911.4463  | 911.4865  | -44.03 | 817   | -   | 823  | 0    | R.AILYNYR.E                     |
| 996.5558  | 995.5485  | 995.4672  | 81.7   | 650   | -   | 658  | 0    | K.AGQYSSDLR.K                   |
| 1090.4866 | 1089.4793 | 1089.4873 | -7.34  | 590   | -   | 600  | 0    | K.ADIGCTPGSGR.N                 |
| 1164.6057 | 1163.5984 | 1163.6411 | -36.67 | 850   | -   | 859  | 0    | R.HQQTITIPAR.S                  |
| 1349.6270 | 1348.6197 | 1348.6809 | -45.38 | 678   | -   | 689  | 0    | R.AQFILQGDACVK.A                |
| 1420.6680 | 1419.6607 | 1419.7147 | -37.99 | 882   | -   | 894  | 0    | K.AAVYNHFIISDGVK.K              |
| 1427.7352 | 1426.7279 | 1426.6625 | 45.9   | 487   | -   | 497  | 1    | R.YYTYMIMNKGK.L + Oxidation (M) |
| 1796.8849 | 1795.8776 | 1795.9178 | -22.39 | 832   | -   | 847  | 0    | R.VELLYNPAFCSLATAK.K            |
| 1977.9272 | 1976.9199 | 1976.9884 | -34.62 | 732   | -   | 747  | 0    | R.SQFPESWLWTVIDLK.Q             |
| 2052.0193 | 2051.0120 | 2051.0874 | -36.73 | 830   | -   | 847  | 1    | K.VRVELLYNPAFCSLATAK.K          |
| 2488.1152 | 2487.1079 | 2487.1814 | -29.56 | 782   | -   | 802  | 0    | K.GICVADPYEVTVMQDFFIDL.R        |

**No match to:** 842.4758, 848.4947, 853.4832, 855.4396, 865.9906, 868.5154, 868.5154, 870.5118, 877.0043, 882.5307, 882.5307, 892.9702, 951.5852, 969.4808, 973.4983, 1017.6315, 1017.6315, 1019.6440, 1033.6599, 1045.5276, 1051.6682, 1051.6682, 1066.4620, 1131.6697, 1151.6833, 1157.5516, 1165.6611, 1165.6611, 1179.5520, 1193.5681, 1277.6617, 1277.6617, 1300.8000, 1307.6257, 1307.6257, 1320.5388, 1334.8374, 1334.8374, 1351.6090, 1365.5970, 1383.6307, 1434.7792, 1448.8667, 1458.6595, 1475.6919, 1487.6974, 1612.7894, 1618.0076, 1618.0076, 1697.8160, 1697.8160, 1707.7140, 1716.7928, 1732.0361, 1796.8849, 1838.8502, 1901.1791, 1993.9021, 2211.0298, 2283.1060, 2398.9456

16. [A0A4W2FTD2](#) Mass: 57549 Score: 40 Expect: 13 Matches: 5

Uncharacterized protein OS=Bos indicus x Bos taurus OX=30522 GN=LOC113883749 PE=3 SV=1

| Observed  | Mr(expt)  | Mr(calc)  | ppm    | Start | End | Miss | Ions | Peptide                 |
|-----------|-----------|-----------|--------|-------|-----|------|------|-------------------------|
| 833.4543  | 832.4470  | 832.4629  | -19.10 | 366   | -   | 372  | 0    | R.MFPIAVR.L             |
| 833.4543  | 832.4471  | 832.4629  | -19.04 | 366   | -   | 372  | 0    | R.MFPIAVR.L             |
| 1151.6833 | 1150.6760 | 1150.6234 | 45.7   | 131   | -   | 141  | 0    | R.TLLSPTFTSGK.L         |
| 1193.5681 | 1192.5608 | 1192.6452 | -70.74 | 380   | -   | 390  | 0    | K.DVEIHGVSIPIK.G        |
| 2052.0193 | 2051.0120 | 2051.1680 | -76.05 | 36    | -   | 54   | 0    | K.LGVPGPRPLPLFGNVLSYR.K |

**No match to:** 842.4758, 848.4947, 850.5049, 853.4832, 855.4396, 864.5046, 865.9906, 868.5154, 868.5154, 870.5118, 877.0043, 882.5307, 882.5307, 887.4306, 892.9702, 912.4536, 912.4536, 951.5852, 969.4808, 973.4983, 996.5558, 1017.6315, 1017.6315, 1019.6440, 1033.6599, 1045.5276, 1051.6682, 1051.6682, 1066.4620, 1090.4866, 1131.6697, 1157.5516, 1164.6057, 1165.6611, 1165.6611, 1179.5520, 1277.6617, 1277.6617, 1300.8000, 1307.6257, 1307.6257, 1320.5388, 1334.8374, 1334.8374, 1349.6270, 1351.6090, 1365.5970, 1383.6307, 1420.6680, 1427.7352, 1434.7792, 1448.8667, 1458.6595, 1475.6919, 1487.6974, 1612.7894, 1618.0076, 1618.0076, 1697.8160, 1697.8160, 1707.7140, 1716.7928, 1732.0361, 1796.8849, 1838.8502, 1901.1791, 1977.9272, 1993.9021, 2211.0298, 2283.1060, 2398.9456, 2488.1152

17. [A0A4W2BNQ3](#) Mass: 57413 Score: 40 Expect: 13 Matches: 5

Uncharacterized protein OS=Bos indicus x Bos taurus OX=30522 GN=LOC113883746 PE=3 SV=1

| Observed  | Mr(expt)  | Mr(calc)  | ppm    | Start | End | Miss | Ions | Peptide                 |
|-----------|-----------|-----------|--------|-------|-----|------|------|-------------------------|
| 833.4543  | 832.4470  | 832.4629  | -19.10 | 366   | -   | 372  | 0    | R.MFPIAVR.L             |
| 833.4543  | 832.4471  | 832.4629  | -19.04 | 366   | -   | 372  | 0    | R.MFPIAVR.L             |
| 1151.6833 | 1150.6760 | 1150.6234 | 45.7   | 131   | -   | 141  | 0    | R.TLLSPTFTSGK.L         |
| 1193.5681 | 1192.5608 | 1192.6452 | -70.74 | 380   | -   | 390  | 0    | K.DVEIHGVSIPIK.G        |
| 2052.0193 | 2051.0120 | 2051.1680 | -76.05 | 36    | -   | 54   | 0    | K.LGVPGPRPLPLFGNVLSYR.K |

**No match to:** 842.4758, 848.4947, 850.5049, 853.4832, 855.4396, 864.5046, 865.9906, 868.5154, 868.5154, 870.5118, 877.0043, 882.5307, 882.5307, 887.4306, 892.9702, 912.4536, 912.4536, 951.5852, 969.4808, 973.4983, 996.5558, 1017.6315, 1017.6315, 1019.6440, 1033.6599, 1045.5276, 1051.6682, 1051.6682, 1066.4620, 1090.4866, 1131.6697, 1157.5516, 1164.6057, 1165.6611, 1165.6611, 1179.5520, 1277.6617, 1277.6617, 1300.8000, 1307.6257, 1307.6257, 1320.5388, 1334.8374, 1334.8374, 1349.6270, 1351.6090, 1365.5970, 1383.6307, 1420.6680, 1427.7352, 1434.7792, 1448.8667, 1458.6595, 1475.6919, 1487.6974, 1612.7894, 1618.0076, 1618.0076, 1697.8160, 1697.8160, 1707.7140, 1716.7928, 1732.0361, 1796.8849, 1838.8502, 1901.1791, 1977.9272, 1993.9021, 2211.0298, 2283.1060, 2398.9456, 2488.1152

18. [A0A4W2HPR9](#) Mass: 57408 Score: 40 Expect: 13 Matches: 5

Uncharacterized protein OS=Bos indicus x Bos taurus OX=30522 GN=LOC113883749 PE=3 SV=1

| Observed  | Mr(expt)  | Mr(calc)  | ppm    | Start | End | Miss | Ions | Peptide                 |
|-----------|-----------|-----------|--------|-------|-----|------|------|-------------------------|
| 833.4543  | 832.4470  | 832.4629  | -19.10 | 366   | -   | 372  | 0    | R.MFPIAVR.L             |
| 833.4543  | 832.4471  | 832.4629  | -19.04 | 366   | -   | 372  | 0    | R.MFPIAVR.L             |
| 1151.6833 | 1150.6760 | 1150.6234 | 45.7   | 131   | -   | 141  | 0    | R.TLLSPTFTSGK.L         |
| 1193.5681 | 1192.5608 | 1192.6452 | -70.74 | 380   | -   | 390  | 0    | K.DVEIHGVSIPIK.G        |
| 2052.0193 | 2051.0120 | 2051.1680 | -76.05 | 36    | -   | 54   | 0    | K.LGVPGPRPLPLFGNVLSYR.K |

**No match to:** 842.4758, 848.4947, 850.5049, 853.4832, 855.4396, 864.5046, 865.9906, 868.5154, 868.5154, 870.5118, 877.0043, 882.5307, 882.5307, 887.4306, 892.9702, 912.4536, 912.4536, 951.5852, 969.4808, 973.4983, 996.5558, 1017.6315, 1017.6315, 1019.6440, 1033.6599, 1045.5276, 1051.6682, 1051.6682, 1066.4620, 1090.4866, 1131.6697, 1157.5516, 1164.6057, 1165.6611, 1165.6611, 1179.5520, 1277.6617, 1277.6617, 1300.8000, 1307.6257, 1307.6257, 1320.5388, 1334.8374, 1334.8374, 1349.6270, 1351.6090, 1365.5970, 1383.6307, 1420.6680, 1427.7352, 1434.7792, 1448.8667, 1458.6595, 1475.6919, 1487.6974, 1612.7894, 1618.0076, 1618.0076, 1697.8160, 1697.8160, 1707.7140, 1716.7928, 1732.0361, 1796.8849, 1838.8502, 1901.1791, 1977.9272, 1993.9021, 2211.0298, 2283.1060, 2398.9456, 2488.1152

19. [A0A4W2BMU5](#) Mass: 57554 Score: 40 Expect: 13 Matches: 5



Uncharacterized protein OS=Bos indicus x Bos taurus OX=30522 GN=LOC113883746 PE=3 SV=1

| Observed                                                                                                                                                                                                                                                                                                                                                                                                                                                                                                                                                                                                                                                                                                                                                                                                              | Mr(expt)  | Mr(calc)  | ppm    | Start | End   | Miss | Ions | Peptide                 |
|-----------------------------------------------------------------------------------------------------------------------------------------------------------------------------------------------------------------------------------------------------------------------------------------------------------------------------------------------------------------------------------------------------------------------------------------------------------------------------------------------------------------------------------------------------------------------------------------------------------------------------------------------------------------------------------------------------------------------------------------------------------------------------------------------------------------------|-----------|-----------|--------|-------|-------|------|------|-------------------------|
| 833.4543                                                                                                                                                                                                                                                                                                                                                                                                                                                                                                                                                                                                                                                                                                                                                                                                              | 832.4470  | 832.4629  | -19.10 | 366   | - 372 | 0    | ---  | R.MFPIAVR.L             |
| 833.4543                                                                                                                                                                                                                                                                                                                                                                                                                                                                                                                                                                                                                                                                                                                                                                                                              | 832.4471  | 832.4629  | -19.04 | 366   | - 372 | 0    | 29   | R.MFPIAVR.L             |
| 1151.6833                                                                                                                                                                                                                                                                                                                                                                                                                                                                                                                                                                                                                                                                                                                                                                                                             | 1150.6760 | 1150.6234 | 45.7   | 131   | - 141 | 0    | ---  | R.TLLSPTFTSGK.L         |
| 1193.5681                                                                                                                                                                                                                                                                                                                                                                                                                                                                                                                                                                                                                                                                                                                                                                                                             | 1192.5608 | 1192.6452 | -70.74 | 380   | - 390 | 0    | ---  | K.DVEIHGVSIPIK.G        |
| 2052.0193                                                                                                                                                                                                                                                                                                                                                                                                                                                                                                                                                                                                                                                                                                                                                                                                             | 2051.0120 | 2051.1680 | -76.05 | 36    | - 54  | 0    | ---  | K.LGVPGPRPLPLFGNVLSYR.K |
| <b>No match to:</b> 842.4758, 848.4947, 850.5049, 853.4832, 855.4396, 864.5046, 865.9906, 868.5154, 868.5154, 870.5118, 877.0043, 882.5307, 882.5307, 887.4306, 892.9702, 912.4536, 912.4536, 951.5852, 969.4808, 973.4983, 996.5558, 1017.6315, 1017.6315, 1019.6440, 1033.6599, 1045.5276, 1051.6682, 1051.6682, 1066.4620, 1090.4866, 1131.6697, 1157.5516, 1164.6057, 1165.6611, 1165.6611, 1179.5520, 1277.6617, 1277.6617, 1300.8000, 1307.6257, 1307.6257, 1320.5388, 1334.8374, 1334.8374, 1349.6270, 1351.6090, 1365.5970, 1383.6307, 1420.6680, 1427.7352, 1434.7792, 1448.8667, 1458.6595, 1475.6919, 1487.6974, 1612.7894, 1618.0076, 1618.0076, 1697.8160, 1697.8160, 1707.7140, 1716.7928, 1732.0361, 1796.8849, 1838.8502, 1901.1791, 1977.9272, 1993.9021, 2211.0298, 2283.1060, 2398.9456, 2488.1152 |           |           |        |       |       |      |      |                         |

20. [Q3T047](#) Mass: 57540 Score: 40 Expect: 13 Matches: 5

Cytochrome P450, family 3, subfamily A, polypeptide 5 OS=Bos taurus OX=9913 GN=CYP3A5 PE=1 SV=1

| Observed                                                                                                                                                                                                                                                                                                                                                                                                                                                                                                                                                                                                                                                                                                                                                                                                              | Mr(expt)  | Mr(calc)  | ppm    | Start | End   | Miss | Ions | Peptide                 |
|-----------------------------------------------------------------------------------------------------------------------------------------------------------------------------------------------------------------------------------------------------------------------------------------------------------------------------------------------------------------------------------------------------------------------------------------------------------------------------------------------------------------------------------------------------------------------------------------------------------------------------------------------------------------------------------------------------------------------------------------------------------------------------------------------------------------------|-----------|-----------|--------|-------|-------|------|------|-------------------------|
| 833.4543                                                                                                                                                                                                                                                                                                                                                                                                                                                                                                                                                                                                                                                                                                                                                                                                              | 832.4470  | 832.4629  | -19.10 | 366   | - 372 | 0    | ---  | R.MFPIAVR.L             |
| 833.4543                                                                                                                                                                                                                                                                                                                                                                                                                                                                                                                                                                                                                                                                                                                                                                                                              | 832.4471  | 832.4629  | -19.04 | 366   | - 372 | 0    | 29   | R.MFPIAVR.L             |
| 1151.6833                                                                                                                                                                                                                                                                                                                                                                                                                                                                                                                                                                                                                                                                                                                                                                                                             | 1150.6760 | 1150.6234 | 45.7   | 131   | - 141 | 0    | ---  | R.TLLSPTFTSGK.L         |
| 1193.5681                                                                                                                                                                                                                                                                                                                                                                                                                                                                                                                                                                                                                                                                                                                                                                                                             | 1192.5608 | 1192.6452 | -70.74 | 380   | - 390 | 0    | ---  | K.DVEIHGVSIPIK.G        |
| 2052.0193                                                                                                                                                                                                                                                                                                                                                                                                                                                                                                                                                                                                                                                                                                                                                                                                             | 2051.0120 | 2051.1680 | -76.05 | 36    | - 54  | 0    | ---  | K.LGVPGPRPLPLFGNVLSYR.K |
| <b>No match to:</b> 842.4758, 848.4947, 850.5049, 853.4832, 855.4396, 864.5046, 865.9906, 868.5154, 868.5154, 870.5118, 877.0043, 882.5307, 882.5307, 887.4306, 892.9702, 912.4536, 912.4536, 951.5852, 969.4808, 973.4983, 996.5558, 1017.6315, 1017.6315, 1019.6440, 1033.6599, 1045.5276, 1051.6682, 1051.6682, 1066.4620, 1090.4866, 1131.6697, 1157.5516, 1164.6057, 1165.6611, 1165.6611, 1179.5520, 1277.6617, 1277.6617, 1300.8000, 1307.6257, 1307.6257, 1320.5388, 1334.8374, 1334.8374, 1349.6270, 1351.6090, 1365.5970, 1383.6307, 1420.6680, 1427.7352, 1434.7792, 1448.8667, 1458.6595, 1475.6919, 1487.6974, 1612.7894, 1618.0076, 1618.0076, 1697.8160, 1697.8160, 1707.7140, 1716.7928, 1732.0361, 1796.8849, 1838.8502, 1901.1791, 1977.9272, 1993.9021, 2211.0298, 2283.1060, 2398.9456, 2488.1152 |           |           |        |       |       |      |      |                         |

21. [A0A3Q1MUB2](#) Mass: 54957 Score: 39 Expect: 18 Matches: 12

Glucosaminyl (N-acetyl) transferase 4 OS=Bos taurus OX=9913 GN=GCNT4 PE=4 SV=1

| Observed                                                                                                                                                                                                                                                                                                                                                                                                                                                                                                                                                                                                                                                                                                                                                       | Mr(expt)  | Mr(calc)  | ppm    | Start | End   | Miss | Ions | Peptide                               |
|----------------------------------------------------------------------------------------------------------------------------------------------------------------------------------------------------------------------------------------------------------------------------------------------------------------------------------------------------------------------------------------------------------------------------------------------------------------------------------------------------------------------------------------------------------------------------------------------------------------------------------------------------------------------------------------------------------------------------------------------------------------|-----------|-----------|--------|-------|-------|------|------|---------------------------------------|
| 833.4543                                                                                                                                                                                                                                                                                                                                                                                                                                                                                                                                                                                                                                                                                                                                                       | 832.4470  | 832.4178  | 35.1   | 137   | - 143 | 0    | ---  | K.LVSEEEK.S                           |
| 833.4543                                                                                                                                                                                                                                                                                                                                                                                                                                                                                                                                                                                                                                                                                                                                                       | 832.4471  | 832.4178  | 35.2   | 137   | - 143 | 0    | ---  | K.LVSEEEK.S                           |
| 996.5558                                                                                                                                                                                                                                                                                                                                                                                                                                                                                                                                                                                                                                                                                                                                                       | 995.5485  | 995.5651  | -16.69 | 359   | - 368 | 0    | ---  | R.VPGIPGEISK.T                        |
| 1033.6599                                                                                                                                                                                                                                                                                                                                                                                                                                                                                                                                                                                                                                                                                                                                                      | 1032.6526 | 1032.5968 | 54.1   | 448   | - 456 | 1    | ---  | R.KWITLSSAK.L                         |
| 1131.6697                                                                                                                                                                                                                                                                                                                                                                                                                                                                                                                                                                                                                                                                                                                                                      | 1130.6624 | 1130.5760 | 76.4   | 328   | - 336 | 0    | ---  | K.YIFNNSFVK.D                         |
| 1165.6611                                                                                                                                                                                                                                                                                                                                                                                                                                                                                                                                                                                                                                                                                                                                                      | 1164.6538 | 1164.6026 | 44.0   | 249   | - 258 | 0    | ---  | K.SNFELVSELK.K                        |
| 1165.6611                                                                                                                                                                                                                                                                                                                                                                                                                                                                                                                                                                                                                                                                                                                                                      | 1164.6539 | 1164.6026 | 44.0   | 249   | - 258 | 0    | ---  | K.SNFELVSELK.K                        |
| 1448.8667                                                                                                                                                                                                                                                                                                                                                                                                                                                                                                                                                                                                                                                                                                                                                      | 1447.8594 | 1447.7267 | 91.7   | 369   | - 381 | 1    | ---  | K.TAQDVS DLQSKTR.L                    |
| 1697.8160                                                                                                                                                                                                                                                                                                                                                                                                                                                                                                                                                                                                                                                                                                                                                      | 1696.8087 | 1696.8939 | -50.19 | 2     | - 15  | 0    | ---  | M.CLLCHRPLIISGMK.T                    |
| 1697.8160                                                                                                                                                                                                                                                                                                                                                                                                                                                                                                                                                                                                                                                                                                                                                      | 1696.8088 | 1696.8939 | -50.17 | 2     | - 15  | 0    | ---  | M.CLLCHRPLIISGMK.T                    |
| 1732.0361                                                                                                                                                                                                                                                                                                                                                                                                                                                                                                                                                                                                                                                                                                                                                      | 1731.0288 | 1730.8873 | 81.8   | 260   | - 275 | 0    | ---  | K.LNGSNMLETVPKPPSTK.T + Oxidation (M) |
| 1796.8849                                                                                                                                                                                                                                                                                                                                                                                                                                                                                                                                                                                                                                                                                                                                                      | 1795.8776 | 1795.9113 | -18.75 | 403   | - 417 | 1    | ---  | R.SVCIYGAELRLMK.Y                     |
| <b>No match to:</b> 842.4758, 848.4947, 850.5049, 853.4832, 855.4396, 864.5046, 865.9906, 868.5154, 868.5154, 870.5118, 877.0043, 882.5307, 882.5307, 887.4306, 892.9702, 912.4536, 912.4536, 951.5852, 969.4808, 973.4983, 996.5558, 1017.6315, 1017.6315, 1019.6440, 1033.6599, 1045.5276, 1051.6682, 1051.6682, 1066.4620, 1090.4866, 1131.6697, 1157.5516, 1164.6057, 1179.5520, 1193.5681, 1277.6617, 1277.6617, 1300.8000, 1307.6257, 1307.6257, 1320.5388, 1334.8374, 1334.8374, 1349.6270, 1351.6090, 1365.5970, 1383.6307, 1420.6680, 1427.7352, 1434.7792, 1458.6595, 1475.6919, 1487.6974, 1612.7894, 1618.0076, 1618.0076, 1707.7140, 1716.7928, 1838.8502, 1901.1791, 1977.9272, 1993.9021, 2052.0193, 2211.0298, 2283.1060, 2398.9456, 2488.1152 |           |           |        |       |       |      |      |                                       |

22. [F1MDR5](#) Mass: 92495 Score: 38 Expect: 21 Matches: 16

Uncharacterized protein OS=Bos taurus OX=9913 GN=MIA2 PE=4 SV=1

| Observed                                                                                                                                                                                                                                                                                                                                                                                                                                                                                                                                                                                                                                                                               | Mr(expt)  | Mr(calc)  | ppm    | Start | End   | Miss | Ions | Peptide                        |
|----------------------------------------------------------------------------------------------------------------------------------------------------------------------------------------------------------------------------------------------------------------------------------------------------------------------------------------------------------------------------------------------------------------------------------------------------------------------------------------------------------------------------------------------------------------------------------------------------------------------------------------------------------------------------------------|-----------|-----------|--------|-------|-------|------|------|--------------------------------|
| 842.4758                                                                                                                                                                                                                                                                                                                                                                                                                                                                                                                                                                                                                                                                               | 841.4685  | 841.4657  | 3.30   | 640   | - 647 | 0    | ---  | R.LSGPAELR.S                   |
| 850.5049                                                                                                                                                                                                                                                                                                                                                                                                                                                                                                                                                                                                                                                                               | 849.4976  | 849.4821  | 18.3   | 67    | - 73  | 1    | ---  | R.SRLYVGR.E                    |
| 864.5046                                                                                                                                                                                                                                                                                                                                                                                                                                                                                                                                                                                                                                                                               | 863.4973  | 863.4865  | 12.6   | 69    | - 75  | 1    | ---  | R.LYVGREK.K                    |
| 868.5154                                                                                                                                                                                                                                                                                                                                                                                                                                                                                                                                                                                                                                                                               | 867.5081  | 867.4311  | 88.8   | 485   | - 491 | 1    | ---  | R.KENAHNR.Q                    |
| 868.5154                                                                                                                                                                                                                                                                                                                                                                                                                                                                                                                                                                                                                                                                               | 867.5082  | 867.4311  | 88.9   | 485   | - 491 | 1    | ---  | R.KENAHNR.Q                    |
| 973.4983                                                                                                                                                                                                                                                                                                                                                                                                                                                                                                                                                                                                                                                                               | 972.4910  | 972.4876  | 3.53   | 240   | - 247 | 0    | ---  | R.EQVNELNK.Q                   |
| 996.5558                                                                                                                                                                                                                                                                                                                                                                                                                                                                                                                                                                                                                                                                               | 995.5485  | 995.4897  | 59.1   | 486   | - 493 | 1    | ---  | K.ENAHNRQK.L                   |
| 1066.4620                                                                                                                                                                                                                                                                                                                                                                                                                                                                                                                                                                                                                                                                              | 1065.4547 | 1065.4913 | -34.33 | 202   | - 209 | 0    | ---  | K.IFQMNEER.L                   |
| 1157.5516                                                                                                                                                                                                                                                                                                                                                                                                                                                                                                                                                                                                                                                                              | 1156.5443 | 1156.5183 | 22.5   | 248   | - 256 | 1    | ---  | K.QRMTFEDSK.V + Oxidation (M)  |
| 1179.5520                                                                                                                                                                                                                                                                                                                                                                                                                                                                                                                                                                                                                                                                              | 1178.5447 | 1178.5489 | -3.52  | 168   | - 177 | 0    | ---  | K.QDELMSEISK.R                 |
| 1307.6257                                                                                                                                                                                                                                                                                                                                                                                                                                                                                                                                                                                                                                                                              | 1306.6184 | 1306.6703 | -39.72 | 202   | - 211 | 1    | ---  | K.IFQMNEERLK.I                 |
| 1307.6257                                                                                                                                                                                                                                                                                                                                                                                                                                                                                                                                                                                                                                                                              | 1306.6185 | 1306.6703 | -39.69 | 202   | - 211 | 1    | ---  | K.IFQMNEERLK.I                 |
| 1351.6090                                                                                                                                                                                                                                                                                                                                                                                                                                                                                                                                                                                                                                                                              | 1350.6017 | 1350.6449 | -31.96 | 168   | - 178 | 1    | ---  | K.QDELMSEISK.R + Oxidation (M) |
| 1707.7140                                                                                                                                                                                                                                                                                                                                                                                                                                                                                                                                                                                                                                                                              | 1706.7067 | 1706.8239 | -68.66 | 722   | - 738 | 0    | ---  | R.GPFPFPPPPGSMYGGPR.D          |
| 1838.8502                                                                                                                                                                                                                                                                                                                                                                                                                                                                                                                                                                                                                                                                              | 1837.8429 | 1837.9356 | -50.44 | 257   | - 271 | 1    | ---  | K.VHVEQVLC DKENQIK.S           |
| 1993.9021                                                                                                                                                                                                                                                                                                                                                                                                                                                                                                                                                                                                                                                                              | 1992.8948 | 1992.9476 | -26.47 | 521   | - 538 | 0    | ---  | R.EHSPYGPSPLGRPSPEMR.A         |
| <b>No match to:</b> 833.4543, 833.4543, 848.4947, 853.4832, 855.4396, 865.9906, 870.5118, 877.0043, 882.5307, 882.5307, 887.4306, 892.9702, 912.4536, 912.4536, 951.5852, 969.4808, 1017.6315, 1017.6315, 1019.6440, 1033.6599, 1045.5276, 1051.6682, 1051.6682, 1090.4866, 1131.6697, 1151.6833, 1164.6057, 1165.6611, 1165.6611, 1193.5681, 1277.6617, 1277.6617, 1300.8000, 1320.5388, 1334.8374, 1334.8374, 1349.6270, 1383.6307, 1420.6680, 1427.7352, 1434.7792, 1448.8667, 1458.6595, 1475.6919, 1487.6974, 1612.7894, 1618.0076, 1618.0076, 1697.8160, 1697.8160, 1716.7928, 1732.0361, 1796.8849, 1901.1791, 1977.9272, 2052.0193, 2211.0298, 2283.1060, 2398.9456, 2488.1152 |           |           |        |       |       |      |      |                                |

23. [Q08DU7](#) Mass: 51251 Score: 37 Expect: 27 Matches: 10

mTERF protein (Fragment) OS=Bos taurus OX=9913 GN=MTERF PE=2 SV=1

| Observed  | Mr(expt)  | Mr(calc)  | ppm    | Start | End   | Miss | Ions | Peptide               |
|-----------|-----------|-----------|--------|-------|-------|------|------|-----------------------|
| 973.4983  | 972.4910  | 972.5253  | -35.29 | 128   | - 135 | 1    | ---  | K.RQPGVFNR.T          |
| 1164.6057 | 1163.5984 | 1163.6339 | -30.48 | 218   | - 227 | 0    | ---  | K.FLYSVGLTHK.D        |
| 1179.5520 | 1178.5447 | 1178.5965 | -43.94 | 334   | - 344 | 1    | ---  | K.DKLSLGLCTAK.E       |
| 1193.5681 | 1192.5608 | 1192.6750 | -95.77 | 50    | - 60  | 0    | ---  | K.GLGHLLTIMVPR.K      |
| 1334.8374 | 1333.8301 | 1333.7024 | 95.8   | 336   | - 347 | 1    | ---  | K.LSSLGLCTAKEIR.K     |
| 1334.8374 | 1333.8301 | 1333.7024 | 95.8   | 336   | - 347 | 1    | ---  | K.LSSLGLCTAKEIR.K     |
| 1365.5970 | 1364.5897 | 1364.6540 | -47.13 | 317   | - 327 | 1    | ---  | K.ILDLSSDCMRR.S       |
| 1475.6919 | 1474.6846 | 1474.8031 | -80.33 | 430   | - 441 | 1    | ---  | K.KLYIEQNIIVLEN.-     |
| 1732.0361 | 1731.0288 | 1730.9679 | 35.2   | 151   | - 166 | 1    | ---  | K.GASIEVIASIIISRYPR.A |

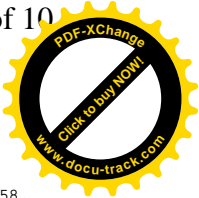

2211.0298 2210.0225 2210.0603 -17.11 199 - 217 1 --- R.SPESFFRSSDNLNLENNIK.F  
**No match to:** 833.4543, 833.4543, 842.4758, 848.4947, 850.5049, 853.4832, 855.4396, 864.5046, 865.9906, 868.5154, 868.5154, 870.5118, 877.0043, 882.5307, 882.5307, 887.4306, 892.9702, 912.4536, 912.4536, 951.5852, 969.4808, 996.5558, 1017.6315, 1017.6315, 1019.6440, 1033.6599, 1045.5276, 1051.6682, 1051.6682, 1066.4620, 1090.4866, 1131.6697, 1151.6833, 1157.5516, 1165.6611, 1165.6611, 1277.6617, 1277.6617, 1300.8000, 1307.6257, 1307.6257, 1320.5388, 1349.6270, 1351.6090, 1383.6307, 1420.6680, 1427.7352, 1434.7792, 1448.8667, 1458.6595, 1487.6974, 1612.7894, 1612.7894, 1618.0076, 1618.0076, 1697.8160, 1697.8160, 1707.7140, 1716.7928, 1796.8849, 1838.8502, 1901.1791, 1977.9272, 1993.9021, 2052.0193, 2283.1060, 2398.9456, 2488.1152

24. [AOA4W2FV66](#) Mass: 129413 Score: 37 Expect: 29 Matches: 15

Replication factor C subunit 1 OS=Bos indicus x Bos taurus OX=30522 GN=RFC1 PE=3 SV=1

| Observed                                                                                                                                                                                                                                                                                                                                                                                                                                                                                                                                                                                                                                                                                                | Mr(expt)  | Mr(calc)  | ppm    | Start | End  | Miss | Ions | Peptide                                 |
|---------------------------------------------------------------------------------------------------------------------------------------------------------------------------------------------------------------------------------------------------------------------------------------------------------------------------------------------------------------------------------------------------------------------------------------------------------------------------------------------------------------------------------------------------------------------------------------------------------------------------------------------------------------------------------------------------------|-----------|-----------|--------|-------|------|------|------|-----------------------------------------|
| 951.5852                                                                                                                                                                                                                                                                                                                                                                                                                                                                                                                                                                                                                                                                                                | 950.5779  | 950.5226  | 58.2   | 6     | 14   | 0    | ---  | K.FFGVIPSGK.K                           |
| 969.4808                                                                                                                                                                                                                                                                                                                                                                                                                                                                                                                                                                                                                                                                                                | 968.4735  | 968.4749  | -1.47  | 443   | 450  | 0    | ---  | K.TNYLVMGR.D + Oxidation (M)            |
| 1090.4866                                                                                                                                                                                                                                                                                                                                                                                                                                                                                                                                                                                                                                                                                               | 1089.4793 | 1089.4826 | -2.98  | 363   | 372  | 0    | ---  | K.ESVSPDEAEK.R                          |
| 1151.6833                                                                                                                                                                                                                                                                                                                                                                                                                                                                                                                                                                                                                                                                                               | 1150.6760 | 1150.5982 | 67.6   | 824   | 833  | 1    | ---  | R.NKALTYDQAK.A                          |
| 1300.8000                                                                                                                                                                                                                                                                                                                                                                                                                                                                                                                                                                                                                                                                                               | 1299.7927 | 1299.7411 | 39.7   | 771   | 780  | 1    | ---  | R.FQRPRVEQIK.G                          |
| 1307.6257                                                                                                                                                                                                                                                                                                                                                                                                                                                                                                                                                                                                                                                                                               | 1306.6184 | 1306.5832 | 27.0   | 745   | 754  | 0    | ---  | K.IPIICMCNDR.N + Oxidation (M)          |
| 1307.6257                                                                                                                                                                                                                                                                                                                                                                                                                                                                                                                                                                                                                                                                                               | 1306.6185 | 1306.5832 | 27.0   | 745   | 754  | 0    | ---  | K.IPIICMCNDR.N + Oxidation (M)          |
| 1349.6270                                                                                                                                                                                                                                                                                                                                                                                                                                                                                                                                                                                                                                                                                               | 1348.6197 | 1348.6623 | -31.54 | 51    | 61   | 1    | ---  | K.EDEFKPKQSNK.K                         |
| 1383.6307                                                                                                                                                                                                                                                                                                                                                                                                                                                                                                                                                                                                                                                                                               | 1382.6234 | 1382.7340 | -79.98 | 974   | 985  | 0    | ---  | R.TVQDLALHMSLR.T                        |
| 1458.6595                                                                                                                                                                                                                                                                                                                                                                                                                                                                                                                                                                                                                                                                                               | 1457.6522 | 1457.6998 | -32.62 | 206   | 217  | 0    | ---  | K.QLQLDEDAELER.Q                        |
| 1475.6919                                                                                                                                                                                                                                                                                                                                                                                                                                                                                                                                                                                                                                                                                               | 1474.6846 | 1474.7164 | -21.57 | 826   | 838  | 1    | ---  | K.ALTYDQAKADSHR.A                       |
| 1796.8849                                                                                                                                                                                                                                                                                                                                                                                                                                                                                                                                                                                                                                                                                               | 1795.8776 | 1795.8121 | 36.5   | 854   | 869  | 0    | ---  | K.VFVSGEETAHMSLMDK.S + Oxidation (M)    |
| 1977.9272                                                                                                                                                                                                                                                                                                                                                                                                                                                                                                                                                                                                                                                                                               | 1976.9199 | 1977.0353 | -58.36 | 794   | 811  | 0    | ---  | K.IPPPPAMNEIILGANQDIR.Q + Oxidation (M) |
| 1993.9021                                                                                                                                                                                                                                                                                                                                                                                                                                                                                                                                                                                                                                                                                               | 1992.8948 | 1993.0105 | -58.02 | 761   | 775  | 1    | ---  | R.SLVHYCFDLRFQRP.R.V                    |
| 2398.9456                                                                                                                                                                                                                                                                                                                                                                                                                                                                                                                                                                                                                                                                                               | 2397.9383 | 2398.0900 | -63.23 | 1032  | 1052 | 0    | ---  | K.DDFENIMEISSWGRSPFSK.L                 |
| <b>No match to:</b> 833.4543, 833.4543, 842.4758, 848.4947, 850.5049, 853.4832, 855.4396, 864.5046, 865.9906, 868.5154, 868.5154, 870.5118, 877.0043, 882.5307, 882.5307, 887.4306, 892.9702, 912.4536, 912.4536, 973.4983, 996.5558, 1017.6315, 1017.6315, 1019.6440, 1033.6599, 1045.5276, 1051.6682, 1051.6682, 1066.4620, 1131.6697, 1157.5516, 1164.6057, 1165.6611, 1165.6611, 1179.5520, 1193.5681, 1277.6617, 1277.6617, 1320.5388, 1334.8374, 1334.8374, 1351.6090, 1365.5970, 1420.6680, 1427.7352, 1434.7792, 1448.8667, 1487.6974, 1612.7894, 1618.0076, 1618.0076, 1697.8160, 1697.8160, 1707.7140, 1716.7928, 1732.0361, 1838.8502, 1901.1791, 2052.0193, 2211.0298, 2283.1060, 2488.1152 |           |           |        |       |      |      |      |                                         |

25. [AOA4W2EXE5](#) Mass: 129354 Score: 36 Expect: 32 Matches: 15

Replication factor C subunit 1 OS=Bos indicus x Bos taurus OX=30522 GN=RFC1 PE=3 SV=1

| Observed                                                                                                                                                                                                                                                                                                                                                                                                                                                                                                                                                                                                                                                                                                | Mr(expt)  | Mr(calc)  | ppm    | Start | End  | Miss | Ions | Peptide                                 |
|---------------------------------------------------------------------------------------------------------------------------------------------------------------------------------------------------------------------------------------------------------------------------------------------------------------------------------------------------------------------------------------------------------------------------------------------------------------------------------------------------------------------------------------------------------------------------------------------------------------------------------------------------------------------------------------------------------|-----------|-----------|--------|-------|------|------|------|-----------------------------------------|
| 951.5852                                                                                                                                                                                                                                                                                                                                                                                                                                                                                                                                                                                                                                                                                                | 950.5779  | 950.5226  | 58.2   | 6     | 14   | 0    | ---  | K.FFGVIPSGK.K                           |
| 969.4808                                                                                                                                                                                                                                                                                                                                                                                                                                                                                                                                                                                                                                                                                                | 968.4735  | 968.4749  | -1.47  | 443   | 450  | 0    | ---  | K.TNYLVMGR.D + Oxidation (M)            |
| 1090.4866                                                                                                                                                                                                                                                                                                                                                                                                                                                                                                                                                                                                                                                                                               | 1089.4793 | 1089.4826 | -2.98  | 363   | 372  | 0    | ---  | K.ESVSPDEAEK.R                          |
| 1151.6833                                                                                                                                                                                                                                                                                                                                                                                                                                                                                                                                                                                                                                                                                               | 1150.6760 | 1150.5982 | 67.6   | 823   | 832  | 1    | ---  | R.NKALTYDQAK.A                          |
| 1300.8000                                                                                                                                                                                                                                                                                                                                                                                                                                                                                                                                                                                                                                                                                               | 1299.7927 | 1299.7411 | 39.7   | 770   | 779  | 1    | ---  | R.FQRPRVEQIK.G                          |
| 1307.6257                                                                                                                                                                                                                                                                                                                                                                                                                                                                                                                                                                                                                                                                                               | 1306.6184 | 1306.5832 | 27.0   | 744   | 753  | 0    | ---  | K.IPIICMCNDR.N + Oxidation (M)          |
| 1307.6257                                                                                                                                                                                                                                                                                                                                                                                                                                                                                                                                                                                                                                                                                               | 1306.6185 | 1306.5832 | 27.0   | 744   | 753  | 0    | ---  | K.IPIICMCNDR.N + Oxidation (M)          |
| 1349.6270                                                                                                                                                                                                                                                                                                                                                                                                                                                                                                                                                                                                                                                                                               | 1348.6197 | 1348.6623 | -31.54 | 51    | 61   | 1    | ---  | K.EDEFKPKQSNK.K                         |
| 1383.6307                                                                                                                                                                                                                                                                                                                                                                                                                                                                                                                                                                                                                                                                                               | 1382.6234 | 1382.7340 | -79.98 | 973   | 984  | 0    | ---  | R.TVQDLALHMSLR.T                        |
| 1458.6595                                                                                                                                                                                                                                                                                                                                                                                                                                                                                                                                                                                                                                                                                               | 1457.6522 | 1457.6998 | -32.62 | 206   | 217  | 0    | ---  | K.QLQLDEDAELER.Q                        |
| 1475.6919                                                                                                                                                                                                                                                                                                                                                                                                                                                                                                                                                                                                                                                                                               | 1474.6846 | 1474.7164 | -21.57 | 825   | 837  | 1    | ---  | K.ALTYDQAKADSHR.A                       |
| 1796.8849                                                                                                                                                                                                                                                                                                                                                                                                                                                                                                                                                                                                                                                                                               | 1795.8776 | 1795.8121 | 36.5   | 853   | 868  | 0    | ---  | K.VFVSGEETAHMSLMDK.S + Oxidation (M)    |
| 1977.9272                                                                                                                                                                                                                                                                                                                                                                                                                                                                                                                                                                                                                                                                                               | 1976.9199 | 1977.0353 | -58.36 | 793   | 810  | 0    | ---  | K.IPPPPAMNEIILGANQDIR.Q + Oxidation (M) |
| 1993.9021                                                                                                                                                                                                                                                                                                                                                                                                                                                                                                                                                                                                                                                                                               | 1992.8948 | 1993.0105 | -58.02 | 760   | 774  | 1    | ---  | R.SLVHYCFDLRFQRP.R.V                    |
| 2398.9456                                                                                                                                                                                                                                                                                                                                                                                                                                                                                                                                                                                                                                                                                               | 2397.9383 | 2398.0900 | -63.23 | 1031  | 1051 | 0    | ---  | K.DDFENIMEISSWGRSPFSK.L                 |
| <b>No match to:</b> 833.4543, 833.4543, 842.4758, 848.4947, 850.5049, 853.4832, 855.4396, 864.5046, 865.9906, 868.5154, 868.5154, 870.5118, 877.0043, 882.5307, 882.5307, 887.4306, 892.9702, 912.4536, 912.4536, 973.4983, 996.5558, 1017.6315, 1017.6315, 1019.6440, 1033.6599, 1045.5276, 1051.6682, 1051.6682, 1066.4620, 1131.6697, 1157.5516, 1164.6057, 1165.6611, 1165.6611, 1179.5520, 1193.5681, 1277.6617, 1277.6617, 1320.5388, 1334.8374, 1334.8374, 1351.6090, 1365.5970, 1420.6680, 1427.7352, 1434.7792, 1448.8667, 1487.6974, 1612.7894, 1618.0076, 1618.0076, 1697.8160, 1697.8160, 1707.7140, 1716.7928, 1732.0361, 1838.8502, 1901.1791, 2052.0193, 2211.0298, 2283.1060, 2488.1152 |           |           |        |       |      |      |      |                                         |

26. [AOA4W2BTQ2](#) Mass: 97692 Score: 36 Expect: 32 Matches: 12

Kinesin-like protein OS=Bos indicus x Bos taurus OX=30522 GN=KIF9 PE=3 SV=1

| Observed                                                                                                                                                                                                                                                                                                                                                                                                                                                                                                                                                                                                                                                                                                                                                           | Mr(expt)  | Mr(calc)  | ppm    | Start | End | Miss | Ions | Peptide                      |
|--------------------------------------------------------------------------------------------------------------------------------------------------------------------------------------------------------------------------------------------------------------------------------------------------------------------------------------------------------------------------------------------------------------------------------------------------------------------------------------------------------------------------------------------------------------------------------------------------------------------------------------------------------------------------------------------------------------------------------------------------------------------|-----------|-----------|--------|-------|-----|------|------|------------------------------|
| 833.4543                                                                                                                                                                                                                                                                                                                                                                                                                                                                                                                                                                                                                                                                                                                                                           | 832.4470  | 832.4807  | -40.43 | 184   | 190 | 0    | ---  | R.ALQQVFK.M                  |
| 833.4543                                                                                                                                                                                                                                                                                                                                                                                                                                                                                                                                                                                                                                                                                                                                                           | 832.4471  | 832.4807  | -40.37 | 184   | 190 | 0    | ---  | R.ALQQVFK.M                  |
| 848.4947                                                                                                                                                                                                                                                                                                                                                                                                                                                                                                                                                                                                                                                                                                                                                           | 847.4874  | 847.5140  | -31.40 | 177   | 183 | 1    | ---  | K.HRGILPR.A                  |
| 864.5046                                                                                                                                                                                                                                                                                                                                                                                                                                                                                                                                                                                                                                                                                                                                                           | 863.4973  | 863.4236  | 85.4   | 586   | 593 | 0    | ---  | K.DLDVSTSK.T                 |
| 887.4306                                                                                                                                                                                                                                                                                                                                                                                                                                                                                                                                                                                                                                                                                                                                                           | 886.4233  | 886.4984  | -84.72 | 665   | 671 | 1    | ---  | K.SILNERR.K                  |
| 996.5558                                                                                                                                                                                                                                                                                                                                                                                                                                                                                                                                                                                                                                                                                                                                                           | 995.5485  | 995.4892  | 59.6   | 49    | 56  | 1    | ---  | K.LSQMMRSK.N + Oxidation (M) |
| 1179.5520                                                                                                                                                                                                                                                                                                                                                                                                                                                                                                                                                                                                                                                                                                                                                          | 1178.5447 | 1178.5931 | -41.07 | 515   | 525 | 0    | ---  | K.NDYAASAVQK.A               |
| 1458.6595                                                                                                                                                                                                                                                                                                                                                                                                                                                                                                                                                                                                                                                                                                                                                          | 1457.6522 | 1457.7409 | -60.80 | 268   | 280 | 1    | ---  | R.IIASHTMNKNSSR.S            |
| 1475.6919                                                                                                                                                                                                                                                                                                                                                                                                                                                                                                                                                                                                                                                                                                                                                          | 1474.6846 | 1474.6787 | 4.01   | 614   | 627 | 0    | ---  | R.ETSNTPEPLASDPK.E           |
| 1901.1791                                                                                                                                                                                                                                                                                                                                                                                                                                                                                                                                                                                                                                                                                                                                                          | 1900.1718 | 1900.0014 | 89.7   | 492   | 507 | 1    | ---  | R.VVLSSQEQEVESTLRR.K         |
| 1977.9272                                                                                                                                                                                                                                                                                                                                                                                                                                                                                                                                                                                                                                                                                                                                                          | 1976.9199 | 1977.0294 | -55.40 | 33    | 48  | 0    | ---  | R.HHPVLQAACYLIWELK.L         |
| 2488.1152                                                                                                                                                                                                                                                                                                                                                                                                                                                                                                                                                                                                                                                                                                                                                          | 2487.1079 | 2487.1523 | -17.83 | 141   | 164 | 0    | ---  | K.DVVSQALNGFNGTMCYGTGAGK.T   |
| <b>No match to:</b> 842.4758, 850.5049, 853.4832, 855.4396, 865.9906, 868.5154, 868.5154, 870.5118, 877.0043, 882.5307, 882.5307, 892.9702, 912.4536, 912.4536, 951.5852, 969.4808, 973.4983, 1017.6315, 1017.6315, 1019.6440, 1033.6599, 1045.5276, 1051.6682, 1051.6682, 1066.4620, 1090.4866, 1131.6697, 1151.6697, 1151.6697, 1157.5516, 1164.6057, 1165.6611, 1165.6611, 1193.5681, 1277.6617, 1277.6617, 1300.8000, 1307.6257, 1307.6257, 1320.5388, 1334.8374, 1334.8374, 1349.6270, 1351.6090, 1365.5970, 1383.6307, 1420.6680, 1427.7352, 1434.7792, 1448.8667, 1487.6974, 1612.7894, 1612.7894, 1618.0076, 1618.0076, 1697.8160, 1697.8160, 1707.7140, 1716.7928, 1732.0361, 1796.8849, 1838.8502, 1993.9021, 2052.0193, 2211.0298, 2283.1060, 2398.9456 |           |           |        |       |     |      |      |                              |

27. [AOAOK2YTL5](#) Mass: 9022 Score: 36 Expect: 33 Matches: 6

Uncharacterized protein OS=Cowpox virus OX=10243 GN=GCPXV0248 PE=4 SV=1

| Observed  | Mr(expt)  | Mr(calc)  | ppm    | Start | End | Miss | Ions | Peptide                       |
|-----------|-----------|-----------|--------|-------|-----|------|------|-------------------------------|
| 1131.6697 | 1130.6624 | 1130.6270 | 31.3   | 31    | 39  | 0    | ---  | K.YIVLMIAHR.V + Oxidation (M) |
| 1277.6617 | 1276.6544 | 1276.7292 | -58.53 | 70    | 79  | 1    | ---  | R.LKFNLYRPNL.-                |
| 1277.6617 | 1276.6545 | 1276.7292 | -58.50 | 70    | 79  | 1    | ---  | R.LKFNLYRPNL.-                |
| 1334.8374 | 1333.8301 | 1333.7275 | 76.9   | 58    | 69  | 0    | ---  | R.STMELILLTASR.L              |
| 1334.8374 | 1333.8301 | 1333.7275 | 76.9   | 58    | 69  | 0    | ---  | R.STMELILLTASR.L              |
| 2052.0193 | 2051.0120 | 2051.1714 | -77.69 | 13    | 30  | 1    | ---  | K.LALRVLVISNGYCHVPLK.Y        |



No match to: 833.4543, 833.4543, 842.4758, 848.4947, 850.5049, 853.4832, 855.4396, 864.5046, 865.9906, 868.5154, 868.5154, 870.5118, 877.0043, 882.5307, 882.5307, 887.4306, 892.9702, 912.4536, 912.4536, 951.5852, 969.4808, 973.4983, 996.5558, 1017.6315, 1017.6315, 1019.6440, 1033.6599, 1045.5276, 1051.6682, 1051.6682, 1066.4620, 1090.4866, 1151.6833, 1157.5516, 1164.6057, 1165.6611, 1165.6611, 1179.5520, 1193.5681, 1300.8000, 1307.6257, 1307.6257, 1320.5388, 1349.6270, 1351.6090, 1365.5970, 1383.6307, 1420.6680, 1427.7352, 1434.7792, 1448.8667, 1458.6595, 1475.6919, 1487.6974, 1612.7894, 1618.0076, 1618.0076, 1697.8160, 1697.8160, 1707.7140, 1716.7928, 1732.0361, 1796.8849, 1838.8502, 1901.1791, 1977.9272, 1993.9021, 2211.0298, 2283.1060, 2398.9456, 2488.1152

28. AOA3Q1N5S1      Mass: 128941      Score: 36      Expect: 38      Matches: 14

Replication factor C subunit 1 OS=Bos taurus OX=9913 GN=RFC1 PE=3 SV=1

| Observed  | Mr(expt)  | Mr(calc)  | ppm    | Start | End  | Miss | Ions | Peptide                                |
|-----------|-----------|-----------|--------|-------|------|------|------|----------------------------------------|
| 969.4808  | 968.4735  | 968.4749  | -1.47  | 437   | 444  | 0    | ---  | K.TNYLVMGR.D + Oxidation (M)           |
| 1090.4866 | 1089.4793 | 1089.4826 | -2.98  | 357   | 366  | 0    | ---  | K.ESVSPDEAEK.R                         |
| 1151.6833 | 1150.6760 | 1150.5982 | 67.6   | 818   | 827  | 1    | ---  | R.NKALTYDQAK.A                         |
| 1300.8000 | 1299.7927 | 1299.7411 | 39.7   | 765   | 774  | 1    | ---  | R.FQRPVVEIK.G                          |
| 1307.6257 | 1306.6184 | 1306.5832 | 27.0   | 739   | 748  | 0    | ---  | K.IPIICMCNDR.N + Oxidation (M)         |
| 1307.6257 | 1306.6185 | 1306.5832 | 27.0   | 739   | 748  | 0    | ---  | K.IPIICMCNDR.N + Oxidation (M)         |
| 1349.6270 | 1348.6197 | 1348.6623 | -31.54 | 34    | 44   | 1    | ---  | K.EDEFKPKQSNK.K                        |
| 1383.6307 | 1382.6234 | 1382.7340 | -79.98 | 968   | 979  | 0    | ---  | R.TVQDLALHMSLR.T                       |
| 1458.6595 | 1457.6522 | 1457.6998 | -32.62 | 203   | 214  | 0    | ---  | K.QLQLDEDAELER.Q                       |
| 1475.6919 | 1474.6846 | 1474.7164 | -21.57 | 820   | 832  | 1    | ---  | K.ALTYDQAKADSHR.A                      |
| 1796.8849 | 1795.8776 | 1795.8121 | 36.5   | 848   | 863  | 0    | ---  | K.VFVSGEETAHMSLMDK.S + Oxidation (M)   |
| 1977.9272 | 1976.9199 | 1977.0353 | -58.36 | 788   | 805  | 0    | ---  | K.IPPPAMNEIILGANQDIR.Q + Oxidation (M) |
| 1993.9021 | 1992.8948 | 1993.0105 | -58.02 | 755   | 769  | 1    | ---  | R.SLVHYCFDLRFQRP.V                     |
| 2398.9456 | 2397.9383 | 2398.0900 | -63.23 | 1026  | 1046 | 0    | ---  | K.DDFENIMEISSWGRSPFSK.L                |

No match to: 833.4543, 833.4543, 842.4758, 848.4947, 850.5049, 853.4832, 855.4396, 864.5046, 865.9906, 868.5154, 868.5154, 870.5118, 877.0043, 882.5307, 882.5307, 887.4306, 892.9702, 912.4536, 912.4536, 951.5852, 973.4983, 996.5558, 1017.6315, 1017.6315, 1019.6440, 1033.6599, 1045.5276, 1051.6682, 1051.6682, 1066.4620, 1131.6697, 1151.6833, 1157.5516, 1164.6057, 1165.6611, 1165.6611, 1179.5520, 1193.5681, 1277.6617, 1277.6617, 1320.5388, 1334.8374, 1334.8374, 1351.6090, 1365.5970, 1420.6680, 1427.7352, 1434.7792, 1448.8667, 1487.6974, 1612.7894, 1618.0076, 1618.0076, 1697.8160, 1697.8160, 1707.7140, 1716.7928, 1732.0361, 1838.8502, 1901.1791, 2052.0193, 2211.0298, 2283.1060, 2488.1152

29. AOA4W2H4H4      Mass: 50468      Score: 35      Expect: 39      Matches: 11

Interferon induced protein 44 like OS=Bos indicus x Bos taurus OX=30522 GN=IFI44L PE=4 SV=1

| Observed  | Mr(expt)  | Mr(calc)  | ppm    | Start | End | Miss | Ions | Peptide                                |
|-----------|-----------|-----------|--------|-------|-----|------|------|----------------------------------------|
| 868.5154  | 867.5081  | 867.5542  | -53.07 | 392   | 399 | 0    | ---  | K.ILGIPLSR.I                           |
| 868.5154  | 867.5082  | 867.5542  | -53.03 | 392   | 399 | 0    | ---  | K.ILGIPLSR.I                           |
| 887.4306  | 886.4233  | 886.4872  | -72.07 | 181   | 188 | 0    | ---  | R.NSLPADVR.A                           |
| 1307.6257 | 1306.6184 | 1306.6629 | -34.06 | 165   | 175 | 1    | ---  | K.DEAGYINRITR.A                        |
| 1307.6257 | 1306.6185 | 1306.6629 | -34.04 | 165   | 175 | 1    | ---  | K.DEAGYINRITR.A                        |
| 1420.6680 | 1419.6607 | 1419.6994 | -27.24 | 2     | 13  | 0    | ---  | M.AVTITLTWNEER.S                       |
| 1434.7792 | 1433.7719 | 1433.7554 | 11.5   | 293   | 304 | 0    | ---  | R.YEFSQKPKITPK.H                       |
| 1838.8502 | 1837.8429 | 1837.9026 | -32.46 | 376   | 391 | 1    | ---  | K.MNKAMISQSQIQNVSK.I + 2 Oxidation (M) |
| 1977.9272 | 1976.9199 | 1976.9877 | -34.28 | 400   | 416 | 1    | ---  | R.ILVVDNYASEREMDPVK.D                  |
| 1993.9021 | 1992.8948 | 1992.9826 | -44.05 | 400   | 416 | 1    | ---  | R.ILVVDNYASEREMDPVK.D + Oxidation (M)  |
| 2283.1060 | 2282.0987 | 2282.2780 | -78.55 | 379   | 399 | 1    | ---  | K.AMISQSQIQNVSKILGIPLSR.I              |

No match to: 833.4543, 833.4543, 842.4758, 848.4947, 850.5049, 853.4832, 855.4396, 864.5046, 865.9906, 870.5118, 877.0043, 882.5307, 882.5307, 892.9702, 912.4536, 912.4536, 951.5852, 969.4808, 973.4983, 996.5558, 1017.6315, 1017.6315, 1019.6440, 1033.6599, 1045.5276, 1051.6682, 1051.6682, 1066.4620, 1090.4866, 1131.6697, 1151.6833, 1157.5516, 1164.6057, 1164.6057, 1165.6611, 1165.6611, 1179.5520, 1193.5681, 1277.6617, 1277.6617, 1320.5388, 1334.8374, 1334.8374, 1349.6270, 1351.6090, 1365.5970, 1383.6307, 1427.7352, 1448.8667, 1458.6595, 1475.6919, 1487.6974, 1612.7894, 1618.0076, 1618.0076, 1697.8160, 1697.8160, 1707.7140, 1716.7928, 1732.0361, 1796.8849, 1901.1791, 2052.0193, 2211.0298, 2398.9456, 2488.1152

30. AOA4W2BTP7      Mass: 104127      Score: 35      Expect: 40      Matches: 12

Kinesin-like protein OS=Bos indicus x Bos taurus OX=30522 GN=KIF9 PE=3 SV=1

| Observed  | Mr(expt)  | Mr(calc)  | ppm    | Start | End | Miss | Ions | Peptide                      |
|-----------|-----------|-----------|--------|-------|-----|------|------|------------------------------|
| 833.4543  | 832.4470  | 832.4807  | -40.43 | 184   | 190 | 0    | ---  | R.ALQQVFK.M                  |
| 833.4543  | 832.4471  | 832.4807  | -40.37 | 184   | 190 | 0    | ---  | R.ALQQVFK.M                  |
| 848.4947  | 847.4874  | 847.5140  | -31.40 | 177   | 183 | 1    | ---  | K.HRGILLPR.A                 |
| 864.5046  | 863.4973  | 863.4236  | 85.4   | 586   | 593 | 0    | ---  | K.DLDVSTSK.T                 |
| 887.4306  | 886.4233  | 886.4984  | -84.72 | 665   | 671 | 1    | ---  | K.SILNERR.K                  |
| 996.5558  | 995.5485  | 995.4892  | 59.6   | 49    | 56  | 1    | ---  | K.LSQMMRSK.N + Oxidation (M) |
| 1179.5520 | 1178.5447 | 1178.5931 | -41.07 | 515   | 525 | 0    | ---  | K.NDYAASAVQK.A               |
| 1458.6595 | 1457.6522 | 1457.7409 | -60.80 | 268   | 280 | 1    | ---  | R.IIASHTMNKNSSR.S            |
| 1475.6919 | 1474.6846 | 1474.6787 | 4.01   | 614   | 627 | 0    | ---  | R.ETSNTPLASDSPK.E            |
| 1901.1791 | 1900.1718 | 1900.0014 | 89.7   | 492   | 507 | 1    | ---  | R.VVLSQQEQEVESTLRR.K         |
| 1977.9272 | 1976.9199 | 1977.0294 | -55.40 | 33    | 48  | 0    | ---  | R.HHPVLQAACYLIWELK.L         |
| 2488.1152 | 2487.1079 | 2487.1523 | -17.83 | 141   | 164 | 0    | ---  | K.DVVSQALNGFNGTIMCYGQTGAGK.T |

No match to: 842.4758, 850.5049, 853.4832, 855.4396, 865.9906, 868.5154, 868.5154, 870.5118, 877.0043, 882.5307, 882.5307, 892.9702, 912.4536, 912.4536, 951.5852, 969.4808, 973.4983, 1017.6315, 1017.6315, 1019.6440, 1033.6599, 1045.5276, 1051.6682, 1051.6682, 1066.4620, 1090.4866, 1131.6697, 1151.6833, 1157.5516, 1164.6057, 1165.6611, 1165.6611, 1193.5681, 1277.6617, 1277.6617, 1300.8000, 1307.6257, 1307.6257, 1320.5388, 1334.8374, 1334.8374, 1349.6270, 1351.6090, 1365.5970, 1383.6307, 1420.6680, 1427.7352, 1434.7792, 1448.8667, 1487.6974, 1612.7894, 1618.0076, 1618.0076, 1697.8160, 1697.8160, 1707.7140, 1716.7928, 1732.0361, 1796.8849, 1838.8502, 1993.9021, 2052.0193, 2211.0298, 2283.1060, 2398.9456

Search Parameters

|                         |                                       |
|-------------------------|---------------------------------------|
| Type of search          | : Sequence Query                      |
| Enzyme                  | : Trypsin                             |
| Fixed modifications     | : <a href="#">Carbamidomethyl (C)</a> |
| Variable modifications  | : <a href="#">Oxidation (M)</a>       |
| Mass values             | : Monoisotopic                        |
| Protein Mass            | : Unrestricted                        |
| Peptide Mass Tolerance  | : ± 100 ppm                           |
| Fragment Mass Tolerance | : ± 0.3 Da                            |
| Max Missed Cleavages    | : 1                                   |
| Instrument type         | : MALDI-TOF-TOF                       |
| Query1 (833.4543,1+):   | <no title>                            |
| Query2 (833.4543,1+):   | Locus:1..14.0.1                       |
| Query3 (842.4758,1+):   | <no title>                            |
| Query4 (848.4947,1+):   | <no title>                            |

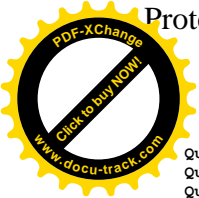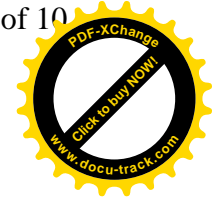

Query5 (850.5049,1+): <no title>  
Query6 (853.4832,1+): <no title>  
Query7 (855.4396,1+): <no title>  
Query8 (864.5046,1+): <no title>  
Query9 (865.9906,1+): <no title>  
Query10 (868.5154,1+): <no title>  
Query11 (868.5154,1+): Locus:1..14.0.12  
Query12 (870.5118,1+): <no title>  
Query13 (877.0043,1+): <no title>  
Query14 (882.5307,1+): <no title>  
Query15 (882.5307,1+): Locus:1..14.0.3  
Query16 (887.4306,1+): <no title>  
Query17 (892.9702,1+): <no title>  
Query18 (912.4536,1+): <no title>  
Query19 (912.4536,1+): Locus:1..14.0.2  
Query20 (951.5852,1+): <no title>  
Query21 (969.4808,1+): <no title>  
Query22 (973.4983,1+): <no title>  
Query23 (996.5558,1+): <no title>  
Query24 (1017.6315,1+): Locus:1..14.0.10  
Query25 (1017.6315,1+): <no title>  
Query26 (1019.6440,1+): <no title>  
Query27 (1033.6599,1+): <no title>  
Query28 (1045.5276,1+): <no title>  
Query29 (1051.6682,1+): <no title>  
Query30 (1051.6682,1+): Locus:1..14.0.4  
Query31 (1066.4620,1+): <no title>  
Query32 (1090.4866,1+): <no title>  
Query33 (1131.6697,1+): <no title>  
Query34 (1151.6833,1+): <no title>  
Query35 (1157.5516,1+): <no title>  
Query36 (1164.6057,1+): <no title>  
Query37 (1165.6611,1+): <no title>  
Query38 (1165.6611,1+): Locus:1..14.0.7  
Query39 (1179.5520,1+): <no title>  
Query40 (1193.5681,1+): <no title>  
Query41 (1277.6617,1+): <no title>  
Query42 (1277.6617,1+): Locus:1..14.0.8  
Query43 (1300.8000,1+): <no title>  
Query44 (1307.6257,1+): <no title>  
Query45 (1307.6257,1+): Locus:1..14.0.9  
Query46 (1320.5388,1+): <no title>  
Query47 (1334.8374,1+): <no title>  
Query48 (1334.8374,1+): Locus:1..14.0.6  
Query49 (1349.6270,1+): <no title>  
Query50 (1351.6090,1+): <no title>  
Query51 (1365.5970,1+): <no title>  
Query52 (1383.6307,1+): <no title>  
Query53 (1420.6680,1+): <no title>  
Query54 (1427.7352,1+): <no title>  
Query55 (1434.7792,1+): <no title>  
Query56 (1448.8667,1+): <no title>  
Query57 (1458.6595,1+): <no title>  
Query58 (1475.6919,1+): <no title>  
Query59 (1487.6974,1+): <no title>  
Query60 (1612.7894,1+): <no title>  
Query61 (1618.0076,1+): Locus:1..14.0.11  
Query62 (1618.0076,1+): <no title>  
Query63 (1697.8160,1+): <no title>  
Query64 (1697.8160,1+): Locus:1..14.0.5  
Query65 (1707.7140,1+): <no title>  
Query66 (1716.7928,1+): <no title>  
Query67 (1732.0361,1+): <no title>  
Query68 (1796.8849,1+): <no title>  
Query69 (1838.8502,1+): <no title>  
Query70 (1901.1791,1+): <no title>  
Query71 (1977.9272,1+): <no title>  
Query72 (1993.9021,1+): <no title>  
Query73 (2052.0193,1+): <no title>  
Query74 (2211.0298,1+): <no title>  
Query75 (2283.1060,1+): <no title>  
Query76 (2398.9456,1+): <no title>  
Query77 (2488.1152,1+): <no title>

Mascot: <http://www.matrixscience.com/>
