# Supplementary material for: Alpha-2-Macroglobulin as a New Promising Biomarker Improving the Diagnostic Sensitivity of Bovine Paratuberculosis
Source: Frontiers journal article supplement (doi:10.3389/fvets.2021.637716), 2021-03-05
Supplement: Data_Sheet_1.zip [file Data_Sheet_1.zip]

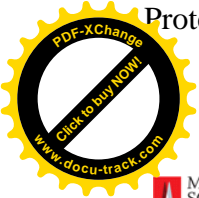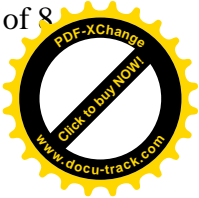

MATRIX SCIENCE Mascot Search Results

User :  
Email :  
Search title : BAEDW\2020\_3\_5\2020\_3\_5\MSMS 14\M20  
Database : Uniprot\_bovine bovine\_20200316 (134392 sequences; 76244912 residues)  
Timestamp : 31 Mar 2020 at 01:08:06 GMT  
Warning : A Peptide summary report will usually give a much clearer picture of MS/MS search results.  
Top Score : 82 for A0A3Q1M3L6, Uncharacterized protein OS=Bos taurus OX=9913 PE=1 SV=1

Mascot Score Histogram

Protein score is -10\*Log(P), where P is the probability that the observed match is a random event.  
Protein scores greater than 64 are significant (p<0.05).  
Protein scores are derived from ions scores as a non-probabilistic basis for ranking protein hits.

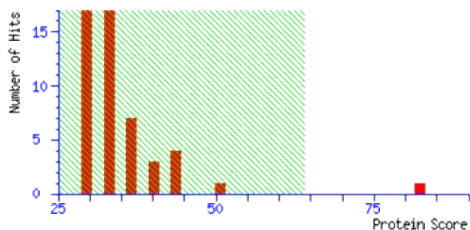

Protein Summary Report

Format As Protein Summary (deprecated) [Help](#)  
Significance threshold p<  Max. number of hits   
Preferred taxonomy All entries

Index

| Accession                      | Mass   | Score | Description                                                                                             |
|--------------------------------|--------|-------|---------------------------------------------------------------------------------------------------------|
| 1. <a href="#">A0A3Q1M3L6</a>  | 41077  | 82    | Uncharacterized protein OS=Bos taurus OX=9913 PE=1 SV=1                                                 |
| 2. <a href="#">Q3SYZ4</a>      | 57456  | 51    | Aspartate--tRNA ligase, cytoplasmic OS=Bos taurus OX=9913 GN=DARS1 PE=2 SV=1                            |
| 3. <a href="#">A0A4W2CKQ7</a>  | 47880  | 45    | Sorting nexin OS=Bos indicus x Bos taurus OX=30522 GN=SNX5 PE=3 SV=1                                    |
| 4. <a href="#">A0A4W2DFG4</a>  | 53946  | 44    | Aspartyl-tRNA synthetase OS=Bos indicus x Bos taurus OX=30522 GN=DARS PE=3 SV=1                         |
| 5. <a href="#">A0A4W2HFK9</a>  | 43131  | 44    | PX domain-containing protein OS=Bos indicus x Bos taurus OX=30522 GN=SNX5 PE=4 SV=1                     |
| 6. <a href="#">A0A4W2DFC3</a>  | 57472  | 42    | Aspartyl-tRNA synthetase OS=Bos indicus x Bos taurus OX=30522 GN=DARS PE=3 SV=1                         |
| 7. <a href="#">A0A4W2FGA1</a>  | 47047  | 42    | Sorting nexin OS=Bos indicus x Bos taurus OX=30522 GN=SNX5 PE=3 SV=1                                    |
| 8. <a href="#">Q3ZBM5</a>      | 47075  | 42    | Sorting nexin-5 OS=Bos taurus OX=9913 GN=SNX5 PE=2 SV=1                                                 |
| 9. <a href="#">P46166</a>      | 4698   | 39    | Beta-defensin 8 OS=Bos taurus OX=9913 GN=DEFB8 PE=1 SV=1                                                |
| 10. <a href="#">A0A3Q1MFP5</a> | 136327 | 37    | Phospholipase OS=Bos taurus OX=9913 GN=PLD1 PE=3 SV=1                                                   |
| 11. <a href="#">A0A4W2FRG9</a> | 61477  | 36    | Transmembrane protein 200C OS=Bos indicus x Bos taurus OX=30522 GN=TMEM200C PE=4 SV=1                   |
| 12. <a href="#">A0A1R3UGP4</a> | 28249  | 36    | Kallikrein G OS=Bos taurus OX=9913 GN=KLNG PE=3 SV=1                                                    |
| 13. <a href="#">A0A4W2F0S3</a> | 54184  | 36    | Aspartyl-tRNA synthetase OS=Bos indicus x Bos taurus OX=30522 GN=DARS PE=3 SV=1                         |
| 14. <a href="#">A0A4W2HLP0</a> | 45410  | 36    | Secernin 1 OS=Bos indicus x Bos taurus OX=30522 GN=SCRN1 PE=4 SV=1                                      |
| 15. <a href="#">A0A3Q1LXT8</a> | 59645  | 35    | Aspartate--tRNA ligase, cytoplasmic OS=Bos taurus OX=9913 GN=DARS1 PE=3 SV=1                            |
| 16. <a href="#">A0A4W2C922</a> | 39936  | 35    | N(alpha)-acetyltransferase 40, NatD catalytic subunit OS=Bos indicus x Bos taurus OX=30522 GN=NAA40 PE= |
| 17. <a href="#">A0A4W2ETY0</a> | 130578 | 34    | Phospholipase OS=Bos indicus x Bos taurus OX=30522 GN=PLD1 PE=3 SV=1                                    |
| 18. <a href="#">F1MTX7</a>     | 57472  | 34    | Aspartate--tRNA ligase, cytoplasmic OS=Bos taurus OX=9913 GN=DARS1 PE=3 SV=1                            |
| 19. <a href="#">A0A4W2H2Q0</a> | 21512  | 34    | Methionine sulfoxide reductase A OS=Bos indicus x Bos taurus OX=30522 GN=MSRA PE=3 SV=1                 |
| 20. <a href="#">E1BKP4</a>     | 84228  | 33    | TANK binding kinase 1 OS=Bos taurus OX=9913 GN=TBK1 PE=4 SV=2                                           |
| 21. <a href="#">A0A4W2CVJ0</a> | 84228  | 33    | TANK binding kinase 1 OS=Bos indicus x Bos taurus OX=30522 GN=TBK1 PE=4 SV=1                            |
| 22. <a href="#">A0A4W2HQ46</a> | 39881  | 33    | N(alpha)-acetyltransferase 40, NatD catalytic subunit OS=Bos indicus x Bos taurus OX=30522 GN=NAA40 PE= |
| 23. <a href="#">A5PKK1</a>     | 27850  | 33    | N(alpha)-acetyltransferase 40, NatD catalytic subunit OS=Bos taurus OX=9913 GN=NAA40 PE=2 SV=1          |
| 24. <a href="#">A0A3Q1M909</a> | 23483  | 32    | Mitochondrial peptide methionine sulfoxide reductase OS=Bos taurus OX=9913 GN=MSRA PE=1 SV=1            |
| 25. <a href="#">A0A4W2H5U8</a> | 23483  | 32    | Methionine sulfoxide reductase A OS=Bos indicus x Bos taurus OX=30522 GN=MSRA PE=3 SV=1                 |
| 26. <a href="#">A0A3Q1LVV9</a> | 13591  | 32    | RNA_pol_L_2 domain-containing protein OS=Bos taurus OX=9913 PE=4 SV=1                                   |
| 27. <a href="#">A0A4W2E767</a> | 68716  | 32    | Acyl-CoA dehydrogenase very long chain OS=Bos indicus x Bos taurus OX=30522 GN=ACADVL PE=3 SV=1         |
| 28. <a href="#">A0A4W2GRX4</a> | 68688  | 32    | Acyl-CoA dehydrogenase very long chain OS=Bos indicus x Bos taurus OX=30522 GN=ACADVL PE=3 SV=1         |
| 29. <a href="#">A0A3Q1LG54</a> | 89438  | 32    | Protein phosphatase 1 regulatory subunit 21 OS=Bos taurus OX=9913 GN=PPP1R21 PE=4 SV=1                  |
| 30. <a href="#">A5D7H6</a>     | 88869  | 32    | KLRAQ1 protein OS=Bos taurus OX=9913 GN=PPP1R21 PE=2 SV=1                                               |

Results List

|                                                                                                                                                                                                                                                                                                                                                                                                                                                                                                                                                                                                                                                                                                                                                           |                            |             |           |                 |                                             |
|-----------------------------------------------------------------------------------------------------------------------------------------------------------------------------------------------------------------------------------------------------------------------------------------------------------------------------------------------------------------------------------------------------------------------------------------------------------------------------------------------------------------------------------------------------------------------------------------------------------------------------------------------------------------------------------------------------------------------------------------------------------|----------------------------|-------------|-----------|-----------------|---------------------------------------------|
| 1.                                                                                                                                                                                                                                                                                                                                                                                                                                                                                                                                                                                                                                                                                                                                                        | <a href="#">A0A3Q1M3L6</a> | Mass: 41077 | Score: 82 | Expect: 0.00079 | Matches: 9                                  |
| Uncharacterized protein OS=Bos taurus OX=9913 PE=1 SV=1                                                                                                                                                                                                                                                                                                                                                                                                                                                                                                                                                                                                                                                                                                   |                            |             |           |                 |                                             |
|                                                                                                                                                                                                                                                                                                                                                                                                                                                                                                                                                                                                                                                                                                                                                           | Observed                   | Mr(expt)    | Mr(calc)  | ppm             | Start End Miss Ions Peptide                 |
|                                                                                                                                                                                                                                                                                                                                                                                                                                                                                                                                                                                                                                                                                                                                                           | 1019.6312                  | 1018.6239   | 1018.5560 | 66.7            | 353 - 360 1 --- K.RTIVPDYR.N                |
|                                                                                                                                                                                                                                                                                                                                                                                                                                                                                                                                                                                                                                                                                                                                                           | 1169.5049                  | 1168.4976   | 1168.5625 | -55.54          | 156 - 165 0 --- R.IQHQQDTGGK.E              |
|                                                                                                                                                                                                                                                                                                                                                                                                                                                                                                                                                                                                                                                                                                                                                           | 1301.6583                  | 1300.6510   | 1300.7252 | -57.00          | 171 - 182 0 --- K.VHNEGLPAPIVR.T            |
|                                                                                                                                                                                                                                                                                                                                                                                                                                                                                                                                                                                                                                                                                                                                                           | 1301.6583                  | 1300.6511   | 1300.7252 | -56.97          | 171 - 182 0 --- K.VHNEGLPAPIVR.T            |
|                                                                                                                                                                                                                                                                                                                                                                                                                                                                                                                                                                                                                                                                                                                                                           | 1363.6659                  | 1362.6586   | 1362.7660 | -78.76          | 343 - 353 1 --- K.WIFSSVVLKLR.T             |
|                                                                                                                                                                                                                                                                                                                                                                                                                                                                                                                                                                                                                                                                                                                                                           | 1826.8557                  | 1825.8484   | 1825.9462 | -53.52          | 193 - 208 0 --- R.EPQVYVLAPPQEELSK.S        |
|                                                                                                                                                                                                                                                                                                                                                                                                                                                                                                                                                                                                                                                                                                                                                           | 2111.9341                  | 2110.9268   | 2111.0324 | -50.02          | 123 - 140 0 46 K.FSWFVDDVEVNTATTTPR.E       |
|                                                                                                                                                                                                                                                                                                                                                                                                                                                                                                                                                                                                                                                                                                                                                           | 2111.9341                  | 2110.9268   | 2111.0324 | -50.01          | 123 - 140 0 --- K.FSWFVDDVEVNTATTTPR.E      |
|                                                                                                                                                                                                                                                                                                                                                                                                                                                                                                                                                                                                                                                                                                                                                           | 2753.2139                  | 2752.2066   | 2752.2877 | -29.45          | 209 - 231 0 --- K.STVSLTCMVTSTFPYDIAVEWQR.N |
| No match to: 842.4648, 848.4858, 850.0170, 850.4961, 853.4749, 861.0225, 864.5088, 865.9901, 868.5096, 870.5018, 876.9943, 881.9693, 882.5198, 882.5198, 892.9673, 892.9674, 908.9358, 927.4315, 951.5755, 1017.6181, 1017.6181, 1033.6478, 1045.5127, 1051.6508, 1051.6508, 1131.6466, 1147.6801, 1151.6693, 1165.6774, 1165.6774, 1179.5454, 1201.5295, 1334.8121, 1334.8121, 1417.6385, 1433.6392, 1439.6532, 1448.8452, 1475.6703, 1479.7141, 1479.7141, 1567.6675, 1593.7277, 1597.6893, 1597.6893, 1617.9797, 1673.7250, 1690.7394, 1732.0092, 1838.8295, 1848.8546, 1873.8428, 1901.1566, 1939.9556, 1993.8798, 2004.8711, 2015.1777, 2093.9248, 2150.9111, 2150.9111, 2210.9976, 2233.0032, 2283.0698, 2305.0757, 2321.0444, 2351.1042, 3337.6887 |                            |             |           |                 |                                             |
| 2.                                                                                                                                                                                                                                                                                                                                                                                                                                                                                                                                                                                                                                                                                                                                                        | <a href="#">Q3SYZ4</a>     | Mass: 57456 | Score: 51 | Expect: 1.1     | Matches: 11                                 |

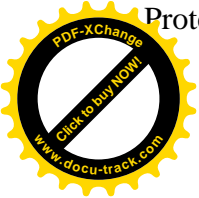

Aspartate--tRNA ligase, cytoplasmic OS=Bos taurus OX=9913 GN=DARS1 PE=2 SV=1

| Observed                                                                                                                                                                                                                                                                                                                                                                                                                                                                                                                                                                                                                                                                                                                            | Mr(expt)  | Mr(calc)  | ppm    | Start | End | Miss | Ions | Peptide                                    |
|-------------------------------------------------------------------------------------------------------------------------------------------------------------------------------------------------------------------------------------------------------------------------------------------------------------------------------------------------------------------------------------------------------------------------------------------------------------------------------------------------------------------------------------------------------------------------------------------------------------------------------------------------------------------------------------------------------------------------------------|-----------|-----------|--------|-------|-----|------|------|--------------------------------------------|
| 1201.5295                                                                                                                                                                                                                                                                                                                                                                                                                                                                                                                                                                                                                                                                                                                           | 1200.5222 | 1200.6350 | -93.95 | 111   | 121 | 0    | ---  | K.ESIVDVEGVVR.K                            |
| 1301.6583                                                                                                                                                                                                                                                                                                                                                                                                                                                                                                                                                                                                                                                                                                                           | 1300.6510 | 1300.5250 | 96.9   | 255   | 264 | 0    | ---  | K.QMCICADFEK.V                             |
| 1301.6583                                                                                                                                                                                                                                                                                                                                                                                                                                                                                                                                                                                                                                                                                                                           | 1300.6511 | 1300.5250 | 96.9   | 255   | 264 | 0    | ---  | K.QMCICADFEK.V                             |
| 1363.6659                                                                                                                                                                                                                                                                                                                                                                                                                                                                                                                                                                                                                                                                                                                           | 1362.6586 | 1362.7256 | -49.12 | 320   | 330 | 1    | ---  | K.RFQTEIQTVVK.Q                            |
| 1838.8295                                                                                                                                                                                                                                                                                                                                                                                                                                                                                                                                                                                                                                                                                                                           | 1837.8222 | 1837.9185 | -52.39 | 394   | 408 | 0    | ---  | K.YPLAVRPFYTMPDPR.N + Oxidation (M)        |
| 1901.1566                                                                                                                                                                                                                                                                                                                                                                                                                                                                                                                                                                                                                                                                                                                           | 1900.1493 | 1899.9625 | 98.3   | 198   | 213 | 1    | ---  | R.LQSGICHPFRETTLN.K                        |
| 1939.9556                                                                                                                                                                                                                                                                                                                                                                                                                                                                                                                                                                                                                                                                                                                           | 1938.9483 | 1938.9912 | -22.10 | 82    | 99  | 0    | ---  | R.QQQFNQALVAVGDHASK.Q                      |
| 2004.8711                                                                                                                                                                                                                                                                                                                                                                                                                                                                                                                                                                                                                                                                                                                           | 2003.8638 | 2003.9636 | -49.79 | 265   | 281 | 1    | ---  | K.VFCIGPVFRAEDSNTHR.H                      |
| 2210.9976                                                                                                                                                                                                                                                                                                                                                                                                                                                                                                                                                                                                                                                                                                                           | 2209.9903 | 2210.1114 | -54.77 | 123   | 141 | 1    | ---  | K.VNQKIGSCTQQDVELHVQK.I                    |
| 2321.0444                                                                                                                                                                                                                                                                                                                                                                                                                                                                                                                                                                                                                                                                                                                           | 2320.0371 | 2320.2288 | -82.59 | 432   | 451 | 1    | ---  | R.IHDPQLVTERALHHGIDLEK.I                   |
| 2351.1042                                                                                                                                                                                                                                                                                                                                                                                                                                                                                                                                                                                                                                                                                                                           | 2350.0969 | 2350.0318 | 27.7   | 412   | 431 | 1    | ---  | K.QSNSYDMFMERGEILSGAQR.I + 2 Oxidation (M) |
| No match to: 842.4648, 848.4858, 850.0170, 850.4961, 853.4749, 861.0225, 864.5088, 865.9901, 868.5096, 870.5018, 876.9943, 881.9693, 892.5198, 892.5198, 892.9673, 892.9674, 908.9358, 927.4315, 951.5755, 1017.6181, 1017.6181, 1019.6312, 1033.6478, 1045.5127, 1051.6508, 1051.6508, 1131.6466, 1147.6801, 1151.6693, 1165.6774, 1165.6774, 1169.5049, 1179.5454, 1334.8121, 1334.8121, 1417.6385, 1433.6392, 1439.6532, 1448.8452, 1475.6703, 1479.7141, 1479.7141, 1567.6675, 1593.7277, 1597.6893, 1597.6893, 1617.9797, 1673.7250, 1690.7394, 1732.0092, 1826.8557, 1848.8546, 1873.8428, 1893.8798, 2015.1777, 2093.9248, 2111.9341, 2111.9341, 2150.9111, 2150.9111, 2233.0032, 2283.0698, 2305.0757, 2753.2139, 3337.6887 |           |           |        |       |     |      |      |                                            |

3. A0A4W2CKQ7 Mass: 47880 Score: 45 Expect: 4.1 Matches: 12

Sorting nexin OS=Bos indicus x Bos taurus OX=30522 GN=SNX5 PE=3 SV=1

| Observed                                                                                                                                                                                                                                                                                                                                                                                                                                                                                                                                                                                                                                                                                                                   | Mr(expt)  | Mr(calc)  | ppm    | Start | End | Miss | Ions | Peptide                         |
|----------------------------------------------------------------------------------------------------------------------------------------------------------------------------------------------------------------------------------------------------------------------------------------------------------------------------------------------------------------------------------------------------------------------------------------------------------------------------------------------------------------------------------------------------------------------------------------------------------------------------------------------------------------------------------------------------------------------------|-----------|-----------|--------|-------|-----|------|------|---------------------------------|
| 882.5198                                                                                                                                                                                                                                                                                                                                                                                                                                                                                                                                                                                                                                                                                                                   | 881.5125  | 881.4317  | 91.7   | 119   | 125 | 1    | ---  | K.EEFAKMK.Q                     |
| 882.5198                                                                                                                                                                                                                                                                                                                                                                                                                                                                                                                                                                                                                                                                                                                   | 881.5125  | 881.4317  | 91.7   | 119   | 125 | 1    | ---  | K.EEFAKMK.Q                     |
| 951.5755                                                                                                                                                                                                                                                                                                                                                                                                                                                                                                                                                                                                                                                                                                                   | 950.5682  | 950.5371  | 32.7   | 264   | 270 | 1    | ---  | K.KIVYICR.Y                     |
| 1151.6693                                                                                                                                                                                                                                                                                                                                                                                                                                                                                                                                                                                                                                                                                                                  | 1150.6620 | 1150.5870 | 65.2   | 193   | 203 | 0    | ---  | K.SADEVLFSGVK.E                 |
| 1334.8121                                                                                                                                                                                                                                                                                                                                                                                                                                                                                                                                                                                                                                                                                                                  | 1333.8048 | 1333.6799 | 93.7   | 381   | 391 | 0    | ---  | K.NLIEMSELEIK.H + Oxidation (M) |
| 1334.8121                                                                                                                                                                                                                                                                                                                                                                                                                                                                                                                                                                                                                                                                                                                  | 1333.8049 | 1333.6799 | 93.7   | 381   | 391 | 0    | ---  | K.NLIEMSELEIK.H + Oxidation (M) |
| 1363.6659                                                                                                                                                                                                                                                                                                                                                                                                                                                                                                                                                                                                                                                                                                                  | 1362.6586 | 1362.6627 | -2.97  | 285   | 296 | 1    | ---  | K.VESRVSSDEDLK.L                |
| 1439.6532                                                                                                                                                                                                                                                                                                                                                                                                                                                                                                                                                                                                                                                                                                                  | 1438.6459 | 1438.7344 | -61.47 | 126   | 137 | 0    | ---  | K.QELEAEYLAIVFK.K               |
| 1593.7277                                                                                                                                                                                                                                                                                                                                                                                                                                                                                                                                                                                                                                                                                                                  | 1592.7204 | 1592.8046 | -52.82 | 321   | 334 | 1    | ---  | K.ALIDYENSINKALDK.A             |
| 1617.9797                                                                                                                                                                                                                                                                                                                                                                                                                                                                                                                                                                                                                                                                                                                  | 1616.9724 | 1616.8621 | 68.2   | 289   | 302 | 1    | ---  | R.VSSDEDLKLTELLR.Y              |
| 1826.8557                                                                                                                                                                                                                                                                                                                                                                                                                                                                                                                                                                                                                                                                                                                  | 1825.8484 | 1825.9170 | -37.54 | 2     | 17  | 1    | ---  | M.AAVPEVLQQEEDRSK.L             |
| 2015.1777                                                                                                                                                                                                                                                                                                                                                                                                                                                                                                                                                                                                                                                                                                                  | 2014.1704 | 2014.0418 | 63.9   | 392   | 408 | 1    | ---  | K.HARNNVSLQSCIDLFK.N            |
| No match to: 842.4648, 848.4858, 850.0170, 850.4961, 853.4749, 861.0225, 864.5088, 865.9901, 868.5096, 870.5018, 876.9943, 881.9693, 892.5198, 892.9673, 908.9358, 927.4315, 951.5755, 1017.6181, 1017.6181, 1019.6312, 1033.6478, 1045.5127, 1051.6508, 1051.6508, 1131.6466, 1147.6801, 1165.6774, 1165.6774, 1169.5049, 1179.5454, 1201.5295, 1301.6583, 1301.6583, 1417.6385, 1433.6392, 1448.8452, 1475.6703, 1479.7141, 1479.7141, 1567.6675, 1597.6893, 1597.6893, 1673.7250, 1690.7394, 1732.0092, 1838.8295, 1848.8546, 1873.8428, 1901.1566, 1939.9556, 1993.8798, 2004.8711, 2093.9248, 2111.9341, 2111.9341, 2150.9111, 2150.9111, 2233.0032, 2283.0698, 2305.0757, 2321.0444, 2351.1042, 2753.2139, 3337.6887 |           |           |        |       |     |      |      |                                 |

4. A0A4W2DFG4 Mass: 53946 Score: 44 Expect: 5.2 Matches: 10

Aspartyl-tRNA synthetase OS=Bos indicus x Bos taurus OX=30522 GN=DARS PE=3 SV=1

| Observed                                                                                                                                                                                                                                                                                                                                                                                                                                                                                                                                                                                                                                                                                                       | Mr(expt)  | Mr(calc)  | ppm    | Start | End | Miss | Ions | Peptide                                    |
|----------------------------------------------------------------------------------------------------------------------------------------------------------------------------------------------------------------------------------------------------------------------------------------------------------------------------------------------------------------------------------------------------------------------------------------------------------------------------------------------------------------------------------------------------------------------------------------------------------------------------------------------------------------------------------------------------------------|-----------|-----------|--------|-------|-----|------|------|--------------------------------------------|
| 1201.5295                                                                                                                                                                                                                                                                                                                                                                                                                                                                                                                                                                                                                                                                                                      | 1200.5222 | 1200.6350 | -93.95 | 80    | 90  | 0    | ---  | K.ESIVDVEGVVR.K                            |
| 1301.6583                                                                                                                                                                                                                                                                                                                                                                                                                                                                                                                                                                                                                                                                                                      | 1300.6510 | 1300.5250 | 96.9   | 224   | 233 | 0    | ---  | K.QMCICADFEK.V                             |
| 1301.6583                                                                                                                                                                                                                                                                                                                                                                                                                                                                                                                                                                                                                                                                                                      | 1300.6511 | 1300.5250 | 96.9   | 224   | 233 | 0    | ---  | K.QMCICADFEK.V                             |
| 1363.6659                                                                                                                                                                                                                                                                                                                                                                                                                                                                                                                                                                                                                                                                                                      | 1362.6586 | 1362.7256 | -49.12 | 289   | 299 | 1    | ---  | K.RFQTEIQTVVK.Q                            |
| 1838.8295                                                                                                                                                                                                                                                                                                                                                                                                                                                                                                                                                                                                                                                                                                      | 1837.8222 | 1837.9185 | -52.39 | 363   | 377 | 0    | ---  | K.YPLAVRPFYTMPDPR.N + Oxidation (M)        |
| 1939.9556                                                                                                                                                                                                                                                                                                                                                                                                                                                                                                                                                                                                                                                                                                      | 1938.9483 | 1938.9469 | 0.73   | 27    | 43  | 1    | ---  | K.ERYGVSSMIQSQEKGK.Q + Oxidation (M)       |
| 2004.8711                                                                                                                                                                                                                                                                                                                                                                                                                                                                                                                                                                                                                                                                                                      | 2003.8638 | 2003.9636 | -49.79 | 234   | 250 | 1    | ---  | K.VFCIGPVFRAEDSNTHR.H                      |
| 2210.9976                                                                                                                                                                                                                                                                                                                                                                                                                                                                                                                                                                                                                                                                                                      | 2209.9903 | 2210.1114 | -54.77 | 92    | 110 | 1    | ---  | K.VNQKIGSCTQQDVELHVQK.I                    |
| 2321.0444                                                                                                                                                                                                                                                                                                                                                                                                                                                                                                                                                                                                                                                                                                      | 2320.0371 | 2320.2288 | -82.59 | 401   | 420 | 1    | ---  | R.IHDPQLVTERALHHGIDLEK.I                   |
| 2351.1042                                                                                                                                                                                                                                                                                                                                                                                                                                                                                                                                                                                                                                                                                                      | 2350.0969 | 2350.0318 | 27.7   | 381   | 400 | 1    | ---  | K.QSNSYDMFMERGEILSGAQR.I + 2 Oxidation (M) |
| No match to: 842.4648, 848.4858, 850.0170, 850.4961, 853.4749, 861.0225, 864.5088, 865.9901, 868.5096, 870.5018, 876.9943, 881.9693, 892.5198, 892.9673, 892.9674, 908.9358, 927.4315, 951.5755, 1017.6181, 1017.6181, 1019.6312, 1033.6478, 1045.5127, 1051.6508, 1051.6508, 1131.6466, 1147.6801, 1165.6774, 1165.6774, 1169.5049, 1179.5454, 1201.5295, 1301.6583, 1301.6583, 1417.6385, 1433.6392, 1448.8452, 1475.6703, 1479.7141, 1479.7141, 1567.6675, 1597.6893, 1597.6893, 1673.7250, 1690.7394, 1732.0092, 1826.8557, 1848.8546, 1873.8428, 1901.1566, 1939.9556, 1993.8798, 2015.1777, 2093.9248, 2111.9341, 2111.9341, 2150.9111, 2150.9111, 2233.0032, 2283.0698, 2305.0757, 2753.2139, 3337.6887 |           |           |        |       |     |      |      |                                            |

5. A0A4W2HFK9 Mass: 43131 Score: 44 Expect: 5.4 Matches: 11

PX domain-containing protein OS=Bos indicus x Bos taurus OX=30522 GN=SNX5 PE=4 SV=1

| Observed                                                                                                                                                                                                                                                                                                                                                                                                                                                                                                                                                                                                                                                                                                                   | Mr(expt)  | Mr(calc)  | ppm    | Start | End | Miss | Ions | Peptide                         |
|----------------------------------------------------------------------------------------------------------------------------------------------------------------------------------------------------------------------------------------------------------------------------------------------------------------------------------------------------------------------------------------------------------------------------------------------------------------------------------------------------------------------------------------------------------------------------------------------------------------------------------------------------------------------------------------------------------------------------|-----------|-----------|--------|-------|-----|------|------|---------------------------------|
| 882.5198                                                                                                                                                                                                                                                                                                                                                                                                                                                                                                                                                                                                                                                                                                                   | 881.5125  | 881.4317  | 91.7   | 84    | 90  | 1    | ---  | K.EEFAKMK.Q                     |
| 882.5198                                                                                                                                                                                                                                                                                                                                                                                                                                                                                                                                                                                                                                                                                                                   | 881.5125  | 881.4317  | 91.7   | 84    | 90  | 1    | ---  | K.EEFAKMK.Q                     |
| 1151.6693                                                                                                                                                                                                                                                                                                                                                                                                                                                                                                                                                                                                                                                                                                                  | 1150.6620 | 1150.5870 | 65.2   | 158   | 168 | 0    | ---  | K.SADEVLFSGVK.E                 |
| 1334.8121                                                                                                                                                                                                                                                                                                                                                                                                                                                                                                                                                                                                                                                                                                                  | 1333.8048 | 1333.6799 | 93.7   | 340   | 350 | 0    | ---  | K.NLIEMSELEIK.H + Oxidation (M) |
| 1334.8121                                                                                                                                                                                                                                                                                                                                                                                                                                                                                                                                                                                                                                                                                                                  | 1333.8049 | 1333.6799 | 93.7   | 340   | 350 | 0    | ---  | K.NLIEMSELEIK.H + Oxidation (M) |
| 1363.6659                                                                                                                                                                                                                                                                                                                                                                                                                                                                                                                                                                                                                                                                                                                  | 1362.6586 | 1362.6627 | -2.97  | 244   | 255 | 1    | ---  | K.VESRVSSDEDLK.L                |
| 1439.6532                                                                                                                                                                                                                                                                                                                                                                                                                                                                                                                                                                                                                                                                                                                  | 1438.6459 | 1438.7344 | -61.47 | 91    | 102 | 0    | ---  | K.QELEAEYLAIVFK.K               |
| 1593.7277                                                                                                                                                                                                                                                                                                                                                                                                                                                                                                                                                                                                                                                                                                                  | 1592.7204 | 1592.8046 | -52.82 | 280   | 293 | 1    | ---  | K.ALIDYENSINKALDK.A             |
| 1617.9797                                                                                                                                                                                                                                                                                                                                                                                                                                                                                                                                                                                                                                                                                                                  | 1616.9724 | 1616.8621 | 68.2   | 248   | 261 | 1    | ---  | R.VSSDEDLKLTELLR.Y              |
| 1826.8557                                                                                                                                                                                                                                                                                                                                                                                                                                                                                                                                                                                                                                                                                                                  | 1825.8484 | 1825.9170 | -37.54 | 2     | 17  | 1    | ---  | M.AAVPEVLQQEEDRSK.T             |
| 2015.1777                                                                                                                                                                                                                                                                                                                                                                                                                                                                                                                                                                                                                                                                                                                  | 2014.1704 | 2014.0418 | 63.9   | 351   | 367 | 1    | ---  | K.HARNNVSLQSCIDLFK.N            |
| No match to: 842.4648, 848.4858, 850.0170, 850.4961, 853.4749, 861.0225, 864.5088, 865.9901, 868.5096, 870.5018, 876.9943, 881.9693, 892.5198, 892.9673, 908.9358, 927.4315, 951.5755, 1017.6181, 1017.6181, 1019.6312, 1033.6478, 1045.5127, 1051.6508, 1051.6508, 1131.6466, 1147.6801, 1165.6774, 1165.6774, 1169.5049, 1179.5454, 1201.5295, 1301.6583, 1301.6583, 1417.6385, 1433.6392, 1448.8452, 1475.6703, 1479.7141, 1479.7141, 1567.6675, 1597.6893, 1597.6893, 1673.7250, 1690.7394, 1732.0092, 1838.8295, 1848.8546, 1873.8428, 1901.1566, 1939.9556, 1993.8798, 2004.8711, 2093.9248, 2111.9341, 2111.9341, 2150.9111, 2150.9111, 2233.0032, 2283.0698, 2305.0757, 2321.0444, 2351.1042, 2753.2139, 3337.6887 |           |           |        |       |     |      |      |                                 |

6. A0A4W2DFC3 Mass: 57472 Score: 42 Expect: 7.9 Matches: 10

Aspartyl-tRNA synthetase OS=Bos indicus x Bos taurus OX=30522 GN=DARS PE=3 SV=1

| Observed  | Mr(expt)  | Mr(calc)  | ppm    | Start | End | Miss | Ions | Peptide                             |
|-----------|-----------|-----------|--------|-------|-----|------|------|-------------------------------------|
| 1201.5295 | 1200.5222 | 1200.6350 | -93.95 | 111   | 121 | 0    | ---  | K.ESIVDVEGVVR.K                     |
| 1301.6583 | 1300.6510 | 1300.5250 | 96.9   | 255   | 264 | 0    | ---  | K.QMCICADFEK.V                      |
| 1301.6583 | 1300.6511 | 1300.5250 | 96.9   | 255   | 264 | 0    | ---  | K.QMCICADFEK.V                      |
| 1363.6659 | 1362.6586 | 1362.7256 | -49.12 | 320   | 330 | 1    | ---  | K.RFQTEIQTVVK.Q                     |
| 1838.8295 | 1837.8222 | 1837.9185 | -52.39 | 394   | 408 | 0    | ---  | K.YPLAVRPFYTMPDPR.N + Oxidation (M) |
| 1939.9556 | 1938.9483 | 1938.9912 | -22.10 | 82    | 99  | 0    | ---  | R.QQQFNQALVAVGDHASK.Q               |
| 2004.8711 | 2003.8638 | 2003.9636 | -49.79 | 265   | 281 | 1    | ---  | K.VFCIGPVFRAEDSNTHR.H               |
| 2210.9976 | 2209.9903 | 2210.1114 | -54.77 | 123   | 141 | 1    | ---  | K.VNQKIGSCTQQDVELHVQK.I             |
| 2321.0444 | 2320.0371 | 2320.2288 | -82.59 | 432   | 451 | 1    | ---  | R.IHDPQLVTERALHHGIDLEK.I            |

2351.1042 2350.0969 2350.0318 27.7 412 - 431 1 --- K.QSNSYDMFMFGEEILSGAQR.I + 2 Oxidation (M)  
**No match to:** 842.4648, 848.4858, 850.0170, 850.4961, 853.4749, 861.0225, 864.5088, 865.9901, 868.5096, 870.5018, 876.9943, 881.9693, 882.5198, 882.5198, 892.9673, 892.9674, 908.9358, 927.4315, 951.5755, 1017.6181, 1017.6181, 1019.6312, 1033.6478, 1045.5127, 1051.6508, 1051.6508, 1131.6466, 1147.6801, 1151.6693, 1165.6774, 1169.5049, 1179.5454, 1334.8121, 1334.8121, 1417.6385, 1433.6392, 1439.6532, 1448.8452, 1475.6703, 1479.7141, 1479.7141, 1567.6675, 1593.7277, 1597.6893, 1597.6893, 1617.9797, 1673.7250, 1690.7394, 1732.0092, 1826.8557, 1848.8546, 1873.8428, 1901.1566, 1939.9556, 1993.8798, 2015.1777, 2093.9248, 2111.9341, 2111.9341, 2150.9111, 2150.9111, 2233.0032, 2283.0698, 2305.0757, 2753.2139, 3337.6887

7. [A0A4W2FGA1](#) Mass: 47047 Score: 42 Expect: 9.1 Matches: 11  
Sorting nexin OS=Bos indicus x Bos taurus OX=30522 GN=SNX5 PE=3 SV=1  

| Observed                                                                                                                                                                                                                                                                                                                                                                                                                                                                                                                                                                                                                                                                                                                                     | Mr(expt)  | Mr(calc)  | ppm    | Start | End   | Miss | Ions | Peptide                         |
|----------------------------------------------------------------------------------------------------------------------------------------------------------------------------------------------------------------------------------------------------------------------------------------------------------------------------------------------------------------------------------------------------------------------------------------------------------------------------------------------------------------------------------------------------------------------------------------------------------------------------------------------------------------------------------------------------------------------------------------------|-----------|-----------|--------|-------|-------|------|------|---------------------------------|
| 882.5198                                                                                                                                                                                                                                                                                                                                                                                                                                                                                                                                                                                                                                                                                                                                     | 881.5125  | 881.4317  | 91.7   | 119   | - 125 | 1    | ---  | K.EEFAKMK.Q                     |
| 882.5198                                                                                                                                                                                                                                                                                                                                                                                                                                                                                                                                                                                                                                                                                                                                     | 881.5125  | 881.4317  | 91.7   | 119   | - 125 | 1    | ---  | K.EEFAKMK.Q                     |
| 1151.6693                                                                                                                                                                                                                                                                                                                                                                                                                                                                                                                                                                                                                                                                                                                                    | 1150.6620 | 1150.5870 | 65.2   | 193   | - 203 | 0    | ---  | K.SADEVLVFGVKE                  |
| 1334.8121                                                                                                                                                                                                                                                                                                                                                                                                                                                                                                                                                                                                                                                                                                                                    | 1333.8048 | 1333.6799 | 93.7   | 375   | - 385 | 0    | ---  | K.NLIEMSELEIK.H + Oxidation (M) |
| 1334.8121                                                                                                                                                                                                                                                                                                                                                                                                                                                                                                                                                                                                                                                                                                                                    | 1333.8049 | 1333.6799 | 93.7   | 375   | - 385 | 0    | ---  | K.NLIEMSELEIK.H + Oxidation (M) |
| 1363.6659                                                                                                                                                                                                                                                                                                                                                                                                                                                                                                                                                                                                                                                                                                                                    | 1362.6586 | 1362.6627 | -2.97  | 279   | - 290 | 1    | ---  | K.VESRVSSDEDLK.L                |
| 1439.6532                                                                                                                                                                                                                                                                                                                                                                                                                                                                                                                                                                                                                                                                                                                                    | 1438.6459 | 1438.7344 | -61.47 | 126   | - 137 | 0    | ---  | K.QELEAEYLAIVFK.K               |
| 1593.7277                                                                                                                                                                                                                                                                                                                                                                                                                                                                                                                                                                                                                                                                                                                                    | 1592.7204 | 1592.8046 | -52.82 | 315   | - 328 | 1    | ---  | K.ALIDYENSINKALDK.A             |
| 1617.9797                                                                                                                                                                                                                                                                                                                                                                                                                                                                                                                                                                                                                                                                                                                                    | 1616.9724 | 1616.8621 | 68.2   | 283   | - 296 | 1    | ---  | R.VSSDEDLKLTELLR.Y              |
| 1826.8557                                                                                                                                                                                                                                                                                                                                                                                                                                                                                                                                                                                                                                                                                                                                    | 1825.8484 | 1825.9170 | -37.54 | 2     | - 17  | 1    | ---  | M.AAVPEVLQQEEDRSK.L             |
| 2015.1777                                                                                                                                                                                                                                                                                                                                                                                                                                                                                                                                                                                                                                                                                                                                    | 2014.1704 | 2014.0418 | 63.9   | 386   | - 402 | 1    | ---  | K.HARNNVSLQSCIDLPK.N            |
| <b>No match to:</b> 842.4648, 848.4858, 850.0170, 850.4961, 853.4749, 861.0225, 864.5088, 865.9901, 868.5096, 870.5018, 876.9943, 881.9693, 892.9673, 892.9674, 908.9358, 927.4315, 951.5755, 1017.6181, 1017.6181, 1019.6312, 1033.6478, 1045.5127, 1051.6508, 1051.6508, 1131.6466, 1147.6801, 1165.6774, 1165.6774, 1169.5049, 1179.5454, 1201.5295, 1301.6583, 1301.6583, 1417.6385, 1433.6392, 1448.8452, 1475.6703, 1479.7141, 1479.7141, 1567.6675, 1597.6893, 1597.6893, 1673.7250, 1690.7394, 1732.0092, 1838.8295, 1848.8546, 1873.8428, 1901.1566, 1939.9556, 1993.8798, 2004.8711, 2093.9248, 2111.9341, 2111.9341, 2150.9111, 2150.9111, 2210.9976, 2233.0032, 2283.0698, 2305.0757, 2321.0444, 2351.1042, 2753.2139, 3337.6887 |           |           |        |       |       |      |      |                                 |

8. [Q3ZBM5](#) Mass: 47075 Score: 42 Expect: 9.1 Matches: 11  
Sorting nexin-5 OS=Bos taurus OX=9913 GN=SNX5 PE=2 SV=1  

| Observed                                                                                                                                                                                                                                                                                                                                                                                                                                                                                                                                                                                                                                                                                                                                     | Mr(expt)  | Mr(calc)  | ppm    | Start | End   | Miss | Ions | Peptide                         |
|----------------------------------------------------------------------------------------------------------------------------------------------------------------------------------------------------------------------------------------------------------------------------------------------------------------------------------------------------------------------------------------------------------------------------------------------------------------------------------------------------------------------------------------------------------------------------------------------------------------------------------------------------------------------------------------------------------------------------------------------|-----------|-----------|--------|-------|-------|------|------|---------------------------------|
| 882.5198                                                                                                                                                                                                                                                                                                                                                                                                                                                                                                                                                                                                                                                                                                                                     | 881.5125  | 881.4317  | 91.7   | 119   | - 125 | 1    | ---  | K.EEFAKMK.Q                     |
| 882.5198                                                                                                                                                                                                                                                                                                                                                                                                                                                                                                                                                                                                                                                                                                                                     | 881.5125  | 881.4317  | 91.7   | 119   | - 125 | 1    | ---  | K.EEFAKMK.Q                     |
| 1151.6693                                                                                                                                                                                                                                                                                                                                                                                                                                                                                                                                                                                                                                                                                                                                    | 1150.6620 | 1150.5870 | 65.2   | 193   | - 203 | 0    | ---  | K.SADEVLVFGVKE                  |
| 1334.8121                                                                                                                                                                                                                                                                                                                                                                                                                                                                                                                                                                                                                                                                                                                                    | 1333.8048 | 1333.6799 | 93.7   | 375   | - 385 | 0    | ---  | K.NLIEMSELEIK.H + Oxidation (M) |
| 1334.8121                                                                                                                                                                                                                                                                                                                                                                                                                                                                                                                                                                                                                                                                                                                                    | 1333.8049 | 1333.6799 | 93.7   | 375   | - 385 | 0    | ---  | K.NLIEMSELEIK.H + Oxidation (M) |
| 1363.6659                                                                                                                                                                                                                                                                                                                                                                                                                                                                                                                                                                                                                                                                                                                                    | 1362.6586 | 1362.6627 | -2.97  | 279   | - 290 | 1    | ---  | K.VESRVSSDEDLK.L                |
| 1439.6532                                                                                                                                                                                                                                                                                                                                                                                                                                                                                                                                                                                                                                                                                                                                    | 1438.6459 | 1438.7344 | -61.47 | 126   | - 137 | 0    | ---  | K.QELEAEYLAIVFK.K               |
| 1593.7277                                                                                                                                                                                                                                                                                                                                                                                                                                                                                                                                                                                                                                                                                                                                    | 1592.7204 | 1592.8046 | -52.82 | 315   | - 328 | 1    | ---  | K.ALIDYENSINKALDK.A             |
| 1617.9797                                                                                                                                                                                                                                                                                                                                                                                                                                                                                                                                                                                                                                                                                                                                    | 1616.9724 | 1616.8621 | 68.2   | 283   | - 296 | 1    | ---  | R.VSSDEDLKLTELLR.Y              |
| 1826.8557                                                                                                                                                                                                                                                                                                                                                                                                                                                                                                                                                                                                                                                                                                                                    | 1825.8484 | 1825.9170 | -37.54 | 2     | - 17  | 1    | ---  | M.AAVPEVLQQEEDRSK.L             |
| 2015.1777                                                                                                                                                                                                                                                                                                                                                                                                                                                                                                                                                                                                                                                                                                                                    | 2014.1704 | 2014.0418 | 63.9   | 386   | - 402 | 1    | ---  | K.HARNNVSLQSCIDLPK.N            |
| <b>No match to:</b> 842.4648, 848.4858, 850.0170, 850.4961, 853.4749, 861.0225, 864.5088, 865.9901, 868.5096, 870.5018, 876.9943, 881.9693, 892.9673, 892.9674, 908.9358, 927.4315, 951.5755, 1017.6181, 1017.6181, 1019.6312, 1033.6478, 1045.5127, 1051.6508, 1051.6508, 1131.6466, 1147.6801, 1165.6774, 1165.6774, 1169.5049, 1179.5454, 1201.5295, 1301.6583, 1301.6583, 1417.6385, 1433.6392, 1448.8452, 1475.6703, 1479.7141, 1479.7141, 1567.6675, 1597.6893, 1597.6893, 1673.7250, 1690.7394, 1732.0092, 1838.8295, 1848.8546, 1873.8428, 1901.1566, 1939.9556, 1993.8798, 2004.8711, 2093.9248, 2111.9341, 2111.9341, 2150.9111, 2150.9111, 2210.9976, 2233.0032, 2283.0698, 2305.0757, 2321.0444, 2351.1042, 2753.2139, 3337.6887 |           |           |        |       |       |      |      |                                 |

9. [P46166](#) Mass: 4698 Score: 39 Expect: 17 Matches: 5  
Beta-defensin 8 OS=Bos taurus OX=9913 GN=DEFB8 PE=1 SV=1  

| Observed                                                                                                                                                                                                                                                                                                                                                                                                                                                                                                                                                                                                                                                                                                                                                                                | Mr(expt)  | Mr(calc)  | ppm    | Start | End  | Miss | Ions | Peptide            |
|-----------------------------------------------------------------------------------------------------------------------------------------------------------------------------------------------------------------------------------------------------------------------------------------------------------------------------------------------------------------------------------------------------------------------------------------------------------------------------------------------------------------------------------------------------------------------------------------------------------------------------------------------------------------------------------------------------------------------------------------------------------------------------------------|-----------|-----------|--------|-------|------|------|------|--------------------|
| 848.4858                                                                                                                                                                                                                                                                                                                                                                                                                                                                                                                                                                                                                                                                                                                                                                                | 847.4785  | 847.4375  | 48.5   | 12    | - 18 | 0    | ---  | R.GFCVPIR.C        |
| 1051.6508                                                                                                                                                                                                                                                                                                                                                                                                                                                                                                                                                                                                                                                                                                                                                                               | 1050.6435 | 1050.5393 | 99.2   | 1     | - 8  | 1    | ---  | -VRNFVTCR.I        |
| 1051.6508                                                                                                                                                                                                                                                                                                                                                                                                                                                                                                                                                                                                                                                                                                                                                                               | 1050.6435 | 1050.5393 | 99.2   | 1     | - 8  | 1    | ---  | -VRNFVTCR.I        |
| 1179.5454                                                                                                                                                                                                                                                                                                                                                                                                                                                                                                                                                                                                                                                                                                                                                                               | 1178.5381 | 1178.5979 | -50.68 | 3     | - 11 | 1    | ---  | R.NFVTCRINR.G      |
| 1690.7394                                                                                                                                                                                                                                                                                                                                                                                                                                                                                                                                                                                                                                                                                                                                                                               | 1689.7321 | 1689.8113 | -46.86 | 25    | - 38 | 1    | ---  | R.QIGTCLGPQIKCCR.- |
| <b>No match to:</b> 842.4648, 850.0170, 850.4961, 853.4749, 861.0225, 864.5088, 865.9901, 868.5096, 870.5018, 876.9943, 881.9693, 882.5198, 882.5198, 892.9673, 892.9674, 908.9358, 927.4315, 951.5755, 1017.6181, 1017.6181, 1019.6312, 1033.6478, 1045.5127, 1131.6466, 1147.6801, 1151.6693, 1165.6774, 1165.6774, 1169.5049, 1201.5295, 1301.6583, 1301.6583, 1334.8121, 1334.8121, 1363.6659, 1417.6385, 1433.6392, 1439.6532, 1448.8452, 1475.6703, 1479.7141, 1479.7141, 1567.6675, 1597.6893, 1597.6893, 1673.7250, 1690.7394, 1732.0092, 1838.8295, 1848.8546, 1873.8428, 1901.1566, 1939.9556, 1993.8798, 2004.8711, 2015.1777, 2093.9248, 2111.9341, 2111.9341, 2150.9111, 2150.9111, 2210.9976, 2233.0032, 2283.0698, 2305.0757, 2321.0444, 2351.1042, 2753.2139, 3337.6887 |           |           |        |       |      |      |      |                    |

10. [A0A3Q1MFP5](#) Mass: 136327 Score: 37 Expect: 26 Matches: 13  
Phospholipase OS=Bos taurus OX=9913 GN=PLD1 PE=3 SV=1  

| Observed                                                                                                                                                                                                                                                                                                                                                                                                                                                                                                                                                                                                                                                                                                                                   | Mr(expt)  | Mr(calc)  | ppm    | Start | End    | Miss | Ions | Peptide                                        |
|--------------------------------------------------------------------------------------------------------------------------------------------------------------------------------------------------------------------------------------------------------------------------------------------------------------------------------------------------------------------------------------------------------------------------------------------------------------------------------------------------------------------------------------------------------------------------------------------------------------------------------------------------------------------------------------------------------------------------------------------|-----------|-----------|--------|-------|--------|------|------|------------------------------------------------|
| 951.5755                                                                                                                                                                                                                                                                                                                                                                                                                                                                                                                                                                                                                                                                                                                                   | 950.5682  | 950.5371  | 32.7   | 806   | - 812  | 1    | ---  | K.IMPKPYR.C + Oxidation (M)                    |
| 1051.6508                                                                                                                                                                                                                                                                                                                                                                                                                                                                                                                                                                                                                                                                                                                                  | 1050.6435 | 1050.5718 | 68.2   | 291   | - 298  | 1    | ---  | K.LLKMPMYR.N                                   |
| 1051.6508                                                                                                                                                                                                                                                                                                                                                                                                                                                                                                                                                                                                                                                                                                                                  | 1050.6435 | 1050.5718 | 68.3   | 291   | - 298  | 1    | ---  | K.LLKMPMYR.N                                   |
| 1131.6466                                                                                                                                                                                                                                                                                                                                                                                                                                                                                                                                                                                                                                                                                                                                  | 1130.6393 | 1130.6699 | -27.06 | 1118  | - 1127 | 0    | ---  | R.DFISKPIIAK.E                                 |
| 1363.6659                                                                                                                                                                                                                                                                                                                                                                                                                                                                                                                                                                                                                                                                                                                                  | 1362.6586 | 1362.7758 | -86.01 | 283   | - 293  | 1    | ---  | K.QLEDYLTKLLK.M                                |
| 1448.8452                                                                                                                                                                                                                                                                                                                                                                                                                                                                                                                                                                                                                                                                                                                                  | 1447.8379 | 1447.7030 | 93.2   | 776   | - 788  | 0    | ---  | R.MPWHDIASAVHGK.A                              |
| 1848.8546                                                                                                                                                                                                                                                                                                                                                                                                                                                                                                                                                                                                                                                                                                                                  | 1847.8473 | 1847.9278 | -43.56 | 438   | - 454  | 1    | ---  | R.DHRFGSYAAIQGNTLAK.W                          |
| 1873.8428                                                                                                                                                                                                                                                                                                                                                                                                                                                                                                                                                                                                                                                                                                                                  | 1872.8355 | 1872.8312 | 2.31   | 266   | - 280  | 0    | ---  | R.TSENMIQQEQFFSR.R                             |
| 2233.0032                                                                                                                                                                                                                                                                                                                                                                                                                                                                                                                                                                                                                                                                                                                                  | 2231.9959 | 2232.1613 | -74.07 | 813   | - 831  | 1    | ---  | R.CLSYPFLLPKSQTAAHELK.Y                        |
| 2283.0698                                                                                                                                                                                                                                                                                                                                                                                                                                                                                                                                                                                                                                                                                                                                  | 2282.0625 | 2282.0294 | 14.5   | 1024  | - 1044 | 0    | ---  | R.DSEMAVIVQDTETVPSVMDGK.E + 2 Oxidation (M)    |
| 2351.1042                                                                                                                                                                                                                                                                                                                                                                                                                                                                                                                                                                                                                                                                                                                                  | 2350.0969 | 2350.0576 | 16.8   | 455   | - 474  | 1    | ---  | K.WYVNAKGYFEDVANAMEEAK.E + Oxidation (M)       |
| 2753.2139                                                                                                                                                                                                                                                                                                                                                                                                                                                                                                                                                                                                                                                                                                                                  | 2752.2066 | 2752.3259 | -43.34 | 604   | - 629  | 1    | ---  | R.VVGGPSLGSLSLTAEETSMESLCLRDKN + Oxidation (M) |
| 3337.6887                                                                                                                                                                                                                                                                                                                                                                                                                                                                                                                                                                                                                                                                                                                                  | 3336.6814 | 3336.6455 | 10.8   | 31    | - 61   | 1    | ---  | K.EGNASQACLQVHSLPHSTSLGGYSLMPR.Q               |
| <b>No match to:</b> 842.4648, 848.4858, 850.0170, 850.4961, 853.4749, 861.0225, 864.5088, 865.9901, 868.5096, 870.5018, 876.9943, 881.9693, 882.5198, 882.5198, 892.9673, 892.9674, 908.9358, 927.4315, 951.5755, 1017.6181, 1017.6181, 1019.6312, 1033.6478, 1045.5127, 1131.6466, 1147.6801, 1151.6693, 1165.6774, 1165.6774, 1169.5049, 1179.5454, 1201.5295, 1301.6583, 1301.6583, 1334.8121, 1334.8121, 1417.6385, 1433.6392, 1439.6532, 1475.6703, 1479.7141, 1479.7141, 1567.6675, 1593.7277, 1597.6893, 1597.6893, 1617.9797, 1673.7250, 1690.7394, 1732.0092, 1826.8557, 1838.8295, 1901.1566, 1939.9556, 1993.8798, 2004.8711, 2015.1777, 2093.9248, 2111.9341, 2111.9341, 2150.9111, 2150.9111, 2210.9976, 2305.0757, 2321.0444 |           |           |        |       |        |      |      |                                                |

11. [A0A4W2FRG9](#) Mass: 61477 Score: 36 Expect: 31 Matches: 10  
Transmembrane protein 200C OS=Bos indicus x Bos taurus OX=30522 GN=TMEM200C PE=4 SV=1  

| Observed  | Mr(expt)  | Mr(calc)  | ppm    | Start | End   | Miss | Ions | Peptide          |
|-----------|-----------|-----------|--------|-------|-------|------|------|------------------|
| 870.5018  | 869.4945  | 869.4620  | 37.4   | 412   | - 419 | 1    | ---  | R.GGARWAPR.E     |
| 1147.6801 | 1146.6728 | 1146.5629 | 95.8   | 100   | - 111 | 0    | ---  | R.VPSVTSSSGGNR.N |
| 1151.6693 | 1150.6620 | 1150.5731 | 77.3   | 449   | - 458 | 1    | ---  | R.RSTSGLPDYR.A   |
| 1201.5295 | 1200.5222 | 1200.5887 | -55.41 | 88    | - 99  | 0    | ---  | K.QPPPPGDSGSPR.V |

|                                                                                                                                                                                                                                                                                                                                                                                                                                                                                                                                                                                                                                                                                                                                                        |           |           |        |     |   |     |   |     |                             |
|--------------------------------------------------------------------------------------------------------------------------------------------------------------------------------------------------------------------------------------------------------------------------------------------------------------------------------------------------------------------------------------------------------------------------------------------------------------------------------------------------------------------------------------------------------------------------------------------------------------------------------------------------------------------------------------------------------------------------------------------------------|-----------|-----------|--------|-----|---|-----|---|-----|-----------------------------|
| 1417.6385                                                                                                                                                                                                                                                                                                                                                                                                                                                                                                                                                                                                                                                                                                                                              | 1416.6312 | 1416.7070 | -53.46 | 100 | - | 113 | 1 | --- | R.VPSVTSSSGGNRRN.S          |
| 1479.7141                                                                                                                                                                                                                                                                                                                                                                                                                                                                                                                                                                                                                                                                                                                                              | 1478.7068 | 1478.7266 | -13.36 | 416 | - | 428 | 1 | --- | R.WAPREPEEPAAAR.T           |
| 1479.7141                                                                                                                                                                                                                                                                                                                                                                                                                                                                                                                                                                                                                                                                                                                                              | 1478.7068 | 1478.7266 | -13.35 | 416 | - | 428 | 1 | --- | R.WAPREPEEPAAAR.T           |
| 1838.8295                                                                                                                                                                                                                                                                                                                                                                                                                                                                                                                                                                                                                                                                                                                                              | 1837.8222 | 1837.8932 | -38.60 | 375 | - | 392 | 1 | --- | R.DGAAGAASRGWQRPPGER.G      |
| 2233.0032                                                                                                                                                                                                                                                                                                                                                                                                                                                                                                                                                                                                                                                                                                                                              | 2231.9959 | 2232.1360 | -62.73 | 284 | - | 307 | 1 | --- | R.SGGGGGTPGAASPDLVSSPRRPR.E |
| 2321.0444                                                                                                                                                                                                                                                                                                                                                                                                                                                                                                                                                                                                                                                                                                                                              | 2320.0371 | 2320.1005 | -27.31 | 571 | - | 592 | 1 | --- | K.LYMISRSHASGVDEGELESAGI.-  |
| <b>No match to:</b> 842.4648, 848.4858, 850.0170, 850.4961, 853.4749, 861.0225, 864.5088, 865.9901, 868.5096, 876.9943, 881.9693, 882.5198, 882.5198, 892.9673, 892.9674, 908.9358, 927.4315, 951.5755, 1017.6181, 1017.6181, 1019.6312, 1033.6478, 1045.5127, 1051.6508, 1051.6508, 1131.6466, 1165.6774, 1165.6774, 1169.5049, 1179.5454, 1301.6583, 1301.6583, 1334.8121, 1334.8121, 1363.6659, 1433.6392, 1439.6532, 1448.8452, 1475.6703, 1567.6675, 1593.7277, 1597.6893, 1597.6893, 1617.9797, 1673.7250, 1690.7394, 1732.0092, 1826.8557, 1848.8546, 1873.8428, 1901.1566, 1939.9556, 1993.8798, 2004.8711, 2015.1777, 2093.9248, 2111.9341, 2111.9341, 2150.9111, 2150.9111, 2210.9976, 2283.0698, 2305.0757, 2351.1042, 2753.2139, 3337.6887 |           |           |        |     |   |     |   |     |                             |

12. [A0A1R3UGP4](#) Mass: 28249 Score: 36 Expect: 32 Matches: 7

|                                                                                                                                                                                                                                                                                                                                                                                                                                                                                                                                                                                                                                                                                                                                                                                          |                 |                 |            |              |            |             |             |                |                                           |
|------------------------------------------------------------------------------------------------------------------------------------------------------------------------------------------------------------------------------------------------------------------------------------------------------------------------------------------------------------------------------------------------------------------------------------------------------------------------------------------------------------------------------------------------------------------------------------------------------------------------------------------------------------------------------------------------------------------------------------------------------------------------------------------|-----------------|-----------------|------------|--------------|------------|-------------|-------------|----------------|-------------------------------------------|
| Kallikrein G OS=Bos taurus OX=9913 GN=KLNG PE=3 SV=1                                                                                                                                                                                                                                                                                                                                                                                                                                                                                                                                                                                                                                                                                                                                     |                 |                 |            |              |            |             |             |                |                                           |
| <b>Observed</b>                                                                                                                                                                                                                                                                                                                                                                                                                                                                                                                                                                                                                                                                                                                                                                          | <b>Mr(expt)</b> | <b>Mr(calc)</b> | <b>ppm</b> | <b>Start</b> | <b>End</b> | <b>Miss</b> | <b>Ions</b> | <b>Peptide</b> |                                           |
| 848.4858                                                                                                                                                                                                                                                                                                                                                                                                                                                                                                                                                                                                                                                                                                                                                                                 | 847.4785        | 847.4473        | 36.8       | 109          | -          | 115         | 0           | ---            | R.NDIMLVK.M + Oxidation (M)               |
| 951.5755                                                                                                                                                                                                                                                                                                                                                                                                                                                                                                                                                                                                                                                                                                                                                                                 | 950.5682        | 950.4862        | 86.3       | 239          | -          | 245         | 0           | ---            | K.YVDWIQK.T                               |
| 1179.5454                                                                                                                                                                                                                                                                                                                                                                                                                                                                                                                                                                                                                                                                                                                                                                                | 1178.5381       | 1178.6482       | -93.36     | 229          | -          | 238         | 1           | ---            | K.KPGVYTKVCK.Y                            |
| 2015.1777                                                                                                                                                                                                                                                                                                                                                                                                                                                                                                                                                                                                                                                                                                                                                                                | 2014.1704       | 2013.9908       | 89.2       | 88           | -          | 105         | 1           | ---            | R.TATKSFPHDPFNNSLPNK.D                    |
| 2283.0698                                                                                                                                                                                                                                                                                                                                                                                                                                                                                                                                                                                                                                                                                                                                                                                | 2282.0625       | 2282.0975       | -15.31     | 68           | -          | 87          | 1           | ---            | R.YVVLHAHSLGRQDGCQTR.T                    |
| 2305.0757                                                                                                                                                                                                                                                                                                                                                                                                                                                                                                                                                                                                                                                                                                                                                                                | 2304.0684       | 2304.1793       | -48.10     | 1            | -          | 21          | 0           | ---            | -.MMTLQLIMFALVTGHVGGETR.I                 |
| 2321.0444                                                                                                                                                                                                                                                                                                                                                                                                                                                                                                                                                                                                                                                                                                                                                                                | 2320.0371       | 2320.1742       | -59.07     | 1            | -          | 21          | 0           | ---            | -.MMTLQLIMFALVTGHVGGETR.I + Oxidation (M) |
| <b>No match to:</b> 842.4648, 850.0170, 850.4961, 853.4749, 861.0225, 864.5088, 865.9901, 868.5096, 870.5018, 876.9943, 881.9693, 882.5198, 882.5198, 892.9673, 892.9674, 908.9358, 927.4315, 1017.6181, 1017.6181, 1019.6312, 1033.6478, 1045.5127, 1051.6508, 1051.6508, 1131.6466, 1147.6801, 1151.6693, 1165.6774, 1165.6774, 1169.5049, 1201.5295, 1301.6583, 1301.6583, 1334.8121, 1334.8121, 1363.6659, 1417.6385, 1433.6392, 1439.6532, 1448.8452, 1475.6703, 1479.7141, 1479.7141, 1567.6675, 1593.7277, 1597.6893, 1597.6893, 1617.9797, 1673.7250, 1690.7394, 1732.0092, 1826.8557, 1838.8295, 1848.8546, 1873.8428, 1901.1566, 1939.9556, 1993.8798, 2004.8711, 2093.9248, 2111.9341, 2111.9341, 2150.9111, 2150.9111, 2210.9976, 2233.0032, 2351.1042, 2753.2139, 3337.6887 |                 |                 |            |              |            |             |             |                |                                           |

13. [A0A4W2F0S3](#) Mass: 54184 Score: 36 Expect: 34 Matches: 9

|                                                                                                                                                                                                                                                                                                                                                                                                                                                                                                                                                                                                                                                                                                                                                                  |                 |                 |            |              |            |             |             |                |                                            |
|------------------------------------------------------------------------------------------------------------------------------------------------------------------------------------------------------------------------------------------------------------------------------------------------------------------------------------------------------------------------------------------------------------------------------------------------------------------------------------------------------------------------------------------------------------------------------------------------------------------------------------------------------------------------------------------------------------------------------------------------------------------|-----------------|-----------------|------------|--------------|------------|-------------|-------------|----------------|--------------------------------------------|
| Aspartyl-tRNA synthetase OS=Bos indicus x Bos taurus OX=30522 GN=DARS PE=3 SV=1                                                                                                                                                                                                                                                                                                                                                                                                                                                                                                                                                                                                                                                                                  |                 |                 |            |              |            |             |             |                |                                            |
| <b>Observed</b>                                                                                                                                                                                                                                                                                                                                                                                                                                                                                                                                                                                                                                                                                                                                                  | <b>Mr(expt)</b> | <b>Mr(calc)</b> | <b>ppm</b> | <b>Start</b> | <b>End</b> | <b>Miss</b> | <b>Ions</b> | <b>Peptide</b> |                                            |
| 1201.5295                                                                                                                                                                                                                                                                                                                                                                                                                                                                                                                                                                                                                                                                                                                                                        | 1200.5222       | 1200.6350       | -93.95     | 111          | -          | 121         | 0           | ---            | K.ESIVDVEGVVR.K                            |
| 1301.6583                                                                                                                                                                                                                                                                                                                                                                                                                                                                                                                                                                                                                                                                                                                                                        | 1300.6510       | 1300.5250       | 96.9       | 255          | -          | 264         | 0           | ---            | K.QMCICADFEK.V                             |
| 1301.6583                                                                                                                                                                                                                                                                                                                                                                                                                                                                                                                                                                                                                                                                                                                                                        | 1300.6511       | 1300.5250       | 96.9       | 255          | -          | 264         | 0           | ---            | K.QMCICADFEK.V                             |
| 1363.6659                                                                                                                                                                                                                                                                                                                                                                                                                                                                                                                                                                                                                                                                                                                                                        | 1362.6586       | 1362.7256       | -49.12     | 320          | -          | 330         | 1           | ---            | K.RFQTEIQTVVK.Q                            |
| 1939.9556                                                                                                                                                                                                                                                                                                                                                                                                                                                                                                                                                                                                                                                                                                                                                        | 1938.9483       | 1938.9912       | -22.10     | 82           | -          | 99          | 0           | ---            | R.QQQFNQALVAVGDHASK.Q                      |
| 2004.8711                                                                                                                                                                                                                                                                                                                                                                                                                                                                                                                                                                                                                                                                                                                                                        | 2003.8638       | 2003.9636       | -49.79     | 265          | -          | 281         | 1           | ---            | K.VFCIGPVFRAEDSNTHR.H                      |
| 2210.9976                                                                                                                                                                                                                                                                                                                                                                                                                                                                                                                                                                                                                                                                                                                                                        | 2209.9903       | 2210.1114       | -54.77     | 123          | -          | 141         | 1           | ---            | K.VNQKIGSCTQQDVELHVQK.I                    |
| 2321.0444                                                                                                                                                                                                                                                                                                                                                                                                                                                                                                                                                                                                                                                                                                                                                        | 2320.0371       | 2320.2288       | -82.59     | 405          | -          | 424         | 1           | ---            | R.IHDPQLVTERALHHGIDLEK.I                   |
| 2351.1042                                                                                                                                                                                                                                                                                                                                                                                                                                                                                                                                                                                                                                                                                                                                                        | 2350.0969       | 2350.0318       | 27.7       | 385          | -          | 404         | 1           | ---            | K.QSNSYDMFMRGEEILSGAQR.I + 2 Oxidation (M) |
| <b>No match to:</b> 842.4648, 848.4858, 850.0170, 850.4961, 853.4749, 861.0225, 864.5088, 865.9901, 868.5096, 870.5018, 876.9943, 881.9693, 882.5198, 882.5198, 892.9673, 892.9674, 908.9358, 927.4315, 951.5755, 1017.6181, 1017.6181, 1019.6312, 1033.6478, 1045.5127, 1051.6508, 1051.6508, 1131.6466, 1147.6801, 1151.6693, 1165.6774, 1165.6774, 1169.5049, 1179.5454, 1201.5295, 1334.8121, 1417.6385, 1433.6392, 1439.6532, 1448.8452, 1475.6703, 1479.7141, 1479.7141, 1567.6675, 1593.7277, 1597.6893, 1597.6893, 1617.9797, 1673.7250, 1690.7394, 1732.0092, 1826.8557, 1838.8295, 1848.8546, 1873.8428, 1901.1566, 1939.9556, 2015.1777, 2093.9248, 2111.9341, 2111.9341, 2150.9111, 2150.9111, 2233.0032, 2283.0698, 2305.0757, 2753.2139, 3337.6887 |                 |                 |            |              |            |             |             |                |                                            |

14. [A0A4W2HLP0](#) Mass: 45410 Score: 36 Expect: 36 Matches: 8

|                                                                                                                                                                                                                                                                                                                                                                                                                                                                                                                                                                                                                                                                                                                                                                             |                 |                 |            |              |            |             |             |                |                                         |
|-----------------------------------------------------------------------------------------------------------------------------------------------------------------------------------------------------------------------------------------------------------------------------------------------------------------------------------------------------------------------------------------------------------------------------------------------------------------------------------------------------------------------------------------------------------------------------------------------------------------------------------------------------------------------------------------------------------------------------------------------------------------------------|-----------------|-----------------|------------|--------------|------------|-------------|-------------|----------------|-----------------------------------------|
| Secernin 1 OS=Bos indicus x Bos taurus OX=30522 GN=SCRNL PE=4 SV=1                                                                                                                                                                                                                                                                                                                                                                                                                                                                                                                                                                                                                                                                                                          |                 |                 |            |              |            |             |             |                |                                         |
| <b>Observed</b>                                                                                                                                                                                                                                                                                                                                                                                                                                                                                                                                                                                                                                                                                                                                                             | <b>Mr(expt)</b> | <b>Mr(calc)</b> | <b>ppm</b> | <b>Start</b> | <b>End</b> | <b>Miss</b> | <b>Ions</b> | <b>Peptide</b> |                                         |
| 1301.6583                                                                                                                                                                                                                                                                                                                                                                                                                                                                                                                                                                                                                                                                                                                                                                   | 1300.6510       | 1300.6524       | -1.04      | 320          | -          | 329         | 1           | ---            | K.EPRFQEKPD.R                           |
| 1301.6583                                                                                                                                                                                                                                                                                                                                                                                                                                                                                                                                                                                                                                                                                                                                                                   | 1300.6511       | 1300.6524       | -1.01      | 320          | -          | 329         | 1           | ---            | K.EPRFQEKPD.R                           |
| 1417.6385                                                                                                                                                                                                                                                                                                                                                                                                                                                                                                                                                                                                                                                                                                                                                                   | 1416.6312       | 1416.7296       | -69.44     | 2            | -          | 13          | 0           | ---            | M.LSLLPHDLCHGR.S                        |
| 1439.6532                                                                                                                                                                                                                                                                                                                                                                                                                                                                                                                                                                                                                                                                                                                                                                   | 1438.6459       | 1438.7105       | -44.91     | 331          | -          | 341         | 1           | ---            | R.HELKKAHEWAR.A                         |
| 2004.8711                                                                                                                                                                                                                                                                                                                                                                                                                                                                                                                                                                                                                                                                                                                                                                   | 2003.8638       | 2004.0197       | -77.80     | 231          | -          | 247         | 1           | ---            | K.QEESITVQTMIDVLRDK.A                   |
| 2210.9976                                                                                                                                                                                                                                                                                                                                                                                                                                                                                                                                                                                                                                                                                                                                                                   | 2209.9903       | 2210.1261       | -61.45     | 32           | -          | 50          | 0           | ---            | R.VLGSLMLMCTYISINQVPR.T + Oxidation (M) |
| 2283.0698                                                                                                                                                                                                                                                                                                                                                                                                                                                                                                                                                                                                                                                                                                                                                                   | 2282.0625       | 2282.1940       | -57.60     | 85           | -          | 105         | 1           | ---            | R.EPAATEALLGMDLVRLGLER.G                |
| 2351.1042                                                                                                                                                                                                                                                                                                                                                                                                                                                                                                                                                                                                                                                                                                                                                                   | 2350.0969       | 2350.2323       | -57.61     | 31           | -          | 50          | 1           | ---            | R.RVLGSLMLMCTYISINQVPR.T                |
| <b>No match to:</b> 842.4648, 848.4858, 850.0170, 850.4961, 853.4749, 861.0225, 864.5088, 865.9901, 868.5096, 870.5018, 876.9943, 881.9693, 882.5198, 882.5198, 892.9673, 892.9674, 908.9358, 927.4315, 951.5755, 1017.6181, 1017.6181, 1019.6312, 1033.6478, 1045.5127, 1051.6508, 1051.6508, 1131.6466, 1147.6801, 1151.6693, 1165.6774, 1165.6774, 1169.5049, 1179.5454, 1201.5295, 1334.8121, 1334.8121, 1363.6659, 1433.6392, 1448.8452, 1475.6703, 1479.7141, 1479.7141, 1567.6675, 1593.7277, 1597.6893, 1597.6893, 1617.9797, 1673.7250, 1690.7394, 1732.0092, 1826.8557, 1838.8295, 1848.8546, 1873.8428, 1901.1566, 1939.9556, 1993.8798, 2015.1777, 2093.9248, 2111.9341, 2111.9341, 2150.9111, 2150.9111, 2233.0032, 2305.0757, 2321.0444, 2753.2139, 3337.6887 |                 |                 |            |              |            |             |             |                |                                         |

15. [A0A3QLXT8](#) Mass: 59645 Score: 35 Expect: 41 Matches: 9

|                                                                                                                                                                                                                                                                                                                                                                                                                                                                                                                                                                                                                                                                                                                                                       |                 |                 |            |              |            |             |             |                |                                            |
|-------------------------------------------------------------------------------------------------------------------------------------------------------------------------------------------------------------------------------------------------------------------------------------------------------------------------------------------------------------------------------------------------------------------------------------------------------------------------------------------------------------------------------------------------------------------------------------------------------------------------------------------------------------------------------------------------------------------------------------------------------|-----------------|-----------------|------------|--------------|------------|-------------|-------------|----------------|--------------------------------------------|
| Aspartate--tRNA ligase, cytoplasmic OS=Bos taurus OX=9913 GN=DARS1 PE=3 SV=1                                                                                                                                                                                                                                                                                                                                                                                                                                                                                                                                                                                                                                                                          |                 |                 |            |              |            |             |             |                |                                            |
| <b>Observed</b>                                                                                                                                                                                                                                                                                                                                                                                                                                                                                                                                                                                                                                                                                                                                       | <b>Mr(expt)</b> | <b>Mr(calc)</b> | <b>ppm</b> | <b>Start</b> | <b>End</b> | <b>Miss</b> | <b>Ions</b> | <b>Peptide</b> |                                            |
| 1201.5295                                                                                                                                                                                                                                                                                                                                                                                                                                                                                                                                                                                                                                                                                                                                             | 1200.5222       | 1200.6350       | -93.95     | 114          | -          | 124         | 0           | ---            | K.ESIVDVEGVVR.K                            |
| 1301.6583                                                                                                                                                                                                                                                                                                                                                                                                                                                                                                                                                                                                                                                                                                                                             | 1300.6510       | 1300.5250       | 96.9       | 258          | -          | 267         | 0           | ---            | K.QMCICADFEK.V                             |
| 1301.6583                                                                                                                                                                                                                                                                                                                                                                                                                                                                                                                                                                                                                                                                                                                                             | 1300.6511       | 1300.5250       | 96.9       | 258          | -          | 267         | 0           | ---            | K.QMCICADFEK.V                             |
| 1363.6659                                                                                                                                                                                                                                                                                                                                                                                                                                                                                                                                                                                                                                                                                                                                             | 1362.6586       | 1362.7256       | -49.12     | 323          | -          | 333         | 1           | ---            | K.RFQTEIQTVVK.Q                            |
| 1838.8295                                                                                                                                                                                                                                                                                                                                                                                                                                                                                                                                                                                                                                                                                                                                             | 1837.8222       | 1837.9185       | -52.39     | 397          | -          | 411         | 0           | ---            | K.YPLAVRPFFYTMPDPR.N + Oxidation (M)       |
| 1939.9556                                                                                                                                                                                                                                                                                                                                                                                                                                                                                                                                                                                                                                                                                                                                             | 1938.9483       | 1938.9912       | -22.10     | 85           | -          | 102         | 0           | ---            | R.QQQFNQALVAVGDHASK.Q                      |
| 2004.8711                                                                                                                                                                                                                                                                                                                                                                                                                                                                                                                                                                                                                                                                                                                                             | 2003.8638       | 2003.9636       | -49.79     | 268          | -          | 284         | 1           | ---            | K.VFCIGPVFRAEDSNTHR.H                      |
| 2210.9976                                                                                                                                                                                                                                                                                                                                                                                                                                                                                                                                                                                                                                                                                                                                             | 2209.9903       | 2210.1114       | -54.77     | 126          | -          | 144         | 1           | ---            | K.VNQKIGSCTQQDVELHVQK.I                    |
| 2351.1042                                                                                                                                                                                                                                                                                                                                                                                                                                                                                                                                                                                                                                                                                                                                             | 2350.0969       | 2350.0318       | 27.7       | 415          | -          | 434         | 1           | ---            | K.QSNSYDMFMRGEEILSGAQR.I + 2 Oxidation (M) |
| <b>No match to:</b> 842.4648, 848.4858, 850.0170, 850.4961, 853.4749, 861.0225, 864.5088, 865.9901, 868.5096, 870.5018, 876.9943, 881.9693, 882.5198, 882.5198, 892.9673, 892.9674, 908.9358, 927.4315, 951.5755, 1017.6181, 1017.6181, 1019.6312, 1033.6478, 1045.5127, 1051.6508, 1051.6508, 1131.6466, 1147.6801, 1151.6693, 1165.6774, 1165.6774, 1169.5049, 1179.5454, 1201.5295, 1334.8121, 1417.6385, 1433.6392, 1439.6532, 1448.8452, 1475.6703, 1479.7141, 1479.7141, 1567.6675, 1593.7277, 1597.6893, 1597.6893, 1617.9797, 1673.7250, 1690.7394, 1732.0092, 1826.8557, 1848.8546, 1873.8428, 1901.1566, 1939.9556, 2093.9248, 2111.9341, 2111.9341, 2150.9111, 2150.9111, 2233.0032, 2283.0698, 2305.0757, 2321.0444, 2753.2139, 3337.6887 |                 |                 |            |              |            |             |             |                |                                            |

16. [A0A4W2C922](#) Mass: 39936 Score: 35 Expect: 42 Matches: 9

|                                                                                                               |                 |                 |            |              |            |             |             |                |                                   |
|---------------------------------------------------------------------------------------------------------------|-----------------|-----------------|------------|--------------|------------|-------------|-------------|----------------|-----------------------------------|
| N(alpha)-acetyltransferase 40, NatD catalytic subunit OS=Bos indicus x Bos taurus OX=30522 GN=NAA40 PE=4 SV=1 |                 |                 |            |              |            |             |             |                |                                   |
| <b>Observed</b>                                                                                               | <b>Mr(expt)</b> | <b>Mr(calc)</b> | <b>ppm</b> | <b>Start</b> | <b>End</b> | <b>Miss</b> | <b>Ions</b> | <b>Peptide</b> |                                   |
| 853.4749                                                                                                      | 852.4676        | 852.4779        | -12.08     | 279          | -          | 285         | 0           | ---            | K.VMLTVFK.H + Oxidation (M)       |
| 1479.7141                                                                                                     | 1478.7068       | 1478.6857       | 14.3       | 124          | -          | 136         | 1           | ---            | R.LEERAAMDAVCAK.V + Oxidation (M) |
| 1479.7141                                                                                                     | 1478.7068       | 1478.6857       | 14.3       | 124          | -          | 136         | 1           | ---            | R.LEERAAMDAVCAK.V + Oxidation (M) |
| 1567.6675                                                                                                     | 1566.6602       | 1566.7460       | -54.76     | 156          | -          | 168         | 1           | ---            | K.YDRNGLNVSIECK.R                 |
| 1597.6893                                                                                                     | 1596.6820       | 1596.8089       | -79.47     | 72           | -          | 85          | 1           | ---            | R.GACAVRGRRPPLQCR.R               |

1597.6893 1596.6821 1596.8089 -79.46 72 - 85 1 --- R.GACAVRGRPPQLQCR.R  
1848.8546 1847.8473 1847.9305 -45.03 170 - 186 0 --- R.VSGLEPATVDWAFDLTK.T  
2004.8711 2003.8638 2004.0316 -83.74 169 - 186 1 --- K.RVSGLEPATVDWAFDLTK.T  
2351.1042 2350.0969 2350.1528 -23.79 1 - 21 1 --- -.MAIDTAWREGGPPWLTSFLAR.H + Oxidation (M)  
**No match to:** 842.4648, 848.4858, 850.0170, 850.4961, 861.0225, 864.5088, 865.9901, 868.5096, 870.5018, 876.9943, 881.9693, 882.5198, 882.5198, 892.9673, 892.9674, 908.9358, 927.4315, 951.5755, 1017.6181, 1017.6181, 1019.6312, 1033.6478, 1045.5127, 1051.6508, 1051.6508, 1051.6508, 1131.6466, 1147.6801, 1151.6693, 1165.6774, 1165.6774, 1169.5049, 1179.5454, 1201.5295, 1301.6583, 1301.6583, 1334.8121, 1334.8121, 1363.6659, 1417.6385, 1433.6392, 1439.6532, 1448.8452, 1475.6703, 1593.7277, 1617.9797, 1673.7250, 1690.7394, 1732.0092, 1826.8557, 1838.8295, 1873.8428, 1901.1566, 1939.9556, 1993.8798, 2015.1777, 2093.9248, 2111.9341, 2111.9341, 2150.9111, 2150.9111, 2210.9976, 2233.0032, 2283.0698, 2305.0757, 2321.0444, 2753.2139, 3337.6887

17. [A0A4W2ETY0](#) Mass: 130578 Score: 34 Expect: 50 Matches: 12

Phospholipase OS=Bos indicus x Bos taurus OX=30522 GN=PLD1 PE=3 SV=1

| Observed                                                                                                                                                                                                                                                                                                                                                                                                                                                                                                                                                                                                                                                                                                                         | Mr(expt)  | Mr(calc)  | ppm    | Start | End | Miss | Ions | Peptide                                         |
|----------------------------------------------------------------------------------------------------------------------------------------------------------------------------------------------------------------------------------------------------------------------------------------------------------------------------------------------------------------------------------------------------------------------------------------------------------------------------------------------------------------------------------------------------------------------------------------------------------------------------------------------------------------------------------------------------------------------------------|-----------|-----------|--------|-------|-----|------|------|-------------------------------------------------|
| 951.5755                                                                                                                                                                                                                                                                                                                                                                                                                                                                                                                                                                                                                                                                                                                         | 950.5682  | 950.5371  | 32.7   | 806   | -   | 812  | 1    | K.IMKPKYR.C + Oxidation (M)                     |
| 1051.6508                                                                                                                                                                                                                                                                                                                                                                                                                                                                                                                                                                                                                                                                                                                        | 1050.6435 | 1050.5718 | 68.2   | 291   | -   | 298  | 1    | K.LLKMPMYR.N                                    |
| 1051.6508                                                                                                                                                                                                                                                                                                                                                                                                                                                                                                                                                                                                                                                                                                                        | 1050.6435 | 1050.5718 | 68.3   | 291   | -   | 298  | 1    | K.LLKMPMYR.N                                    |
| 1363.6659                                                                                                                                                                                                                                                                                                                                                                                                                                                                                                                                                                                                                                                                                                                        | 1362.6586 | 1362.7758 | -86.01 | 283   | -   | 293  | 1    | K.QLEDYLTLLK.LM                                 |
| 1448.8452                                                                                                                                                                                                                                                                                                                                                                                                                                                                                                                                                                                                                                                                                                                        | 1447.8379 | 1447.7030 | 93.2   | 776   | -   | 788  | 0    | R.MPWHDIASAVHGK.A                               |
| 1848.8546                                                                                                                                                                                                                                                                                                                                                                                                                                                                                                                                                                                                                                                                                                                        | 1847.8473 | 1847.9278 | -43.56 | 438   | -   | 454  | 1    | R.DHRFGSYAAIQGNLAK.W                            |
| 1873.8428                                                                                                                                                                                                                                                                                                                                                                                                                                                                                                                                                                                                                                                                                                                        | 1872.8355 | 1872.8312 | 2.31   | 266   | -   | 280  | 0    | R.TSENMIQQEQFFSR.R                              |
| 2233.0032                                                                                                                                                                                                                                                                                                                                                                                                                                                                                                                                                                                                                                                                                                                        | 2231.9959 | 2232.1613 | -74.07 | 813   | -   | 831  | 1    | R.CLSYPFLLPKSQTTAHELK.Y                         |
| 2283.0698                                                                                                                                                                                                                                                                                                                                                                                                                                                                                                                                                                                                                                                                                                                        | 2282.0625 | 2282.0294 | 14.5   | 1024  | -   | 1044 | 0    | R.DSEMAVIVQDTETVPSVMDGK.E + 2 Oxidation (M)     |
| 2351.1042                                                                                                                                                                                                                                                                                                                                                                                                                                                                                                                                                                                                                                                                                                                        | 2350.0969 | 2350.0576 | 16.8   | 455   | -   | 474  | 1    | K.WYVNAKGYFEDVANAMEEAK.E + Oxidation (M)        |
| 2753.2139                                                                                                                                                                                                                                                                                                                                                                                                                                                                                                                                                                                                                                                                                                                        | 2752.2066 | 2752.3259 | -43.34 | 604   | -   | 629  | 1    | R.VVGGPSLGS�TAEETTESMESLCLRDK.N + Oxidation (M) |
| 3337.6887                                                                                                                                                                                                                                                                                                                                                                                                                                                                                                                                                                                                                                                                                                                        | 3336.6814 | 3336.6455 | 10.8   | 31    | -   | 61   | 1    | K.EGNASQACLRQVHSLPHSTALGGYSLMPR.Q               |
| <b>No match to:</b> 842.4648, 848.4858, 850.0170, 850.4961, 853.4749, 861.0225, 864.5088, 865.9901, 868.5096, 870.5018, 876.9943, 881.9693, 882.5198, 882.5198, 892.9673, 892.9674, 908.9358, 927.4315, 1017.6181, 1017.6181, 1019.6312, 1033.6478, 1045.5127, 1131.6466, 1147.6801, 1151.6693, 1165.6774, 1165.6774, 1169.5049, 1179.5454, 1201.5295, 1301.6583, 1301.6583, 1334.8121, 1334.8121, 1417.6385, 1433.6392, 1439.6532, 1475.6703, 1479.7141, 1479.7141, 1567.6675, 1593.7277, 1597.6893, 1597.6893, 1617.9797, 1673.7250, 1690.7394, 1732.0092, 1826.8557, 1838.8295, 1901.1566, 1939.9556, 1993.8798, 2004.8711, 2015.1777, 2093.9248, 2111.9341, 2111.9341, 2150.9111, 2150.9111, 2210.9976, 2305.0757, 2321.0444 |           |           |        |       |     |      |      |                                                 |

18. [F1MTX7](#) Mass: 57472 Score: 34 Expect: 51 Matches: 9

Aspartate--tRNA ligase, cytoplasmic OS=Bos taurus OX=9913 GN=DARS1 PE=3 SV=1

| Observed                                                                                                                                                                                                                                                                                                                                                                                                                                                                                                                                                                                                                                                                                                                                                                                                                | Mr(expt)  | Mr(calc)  | ppm    | Start | End | Miss | Ions | Peptide                                     |
|-------------------------------------------------------------------------------------------------------------------------------------------------------------------------------------------------------------------------------------------------------------------------------------------------------------------------------------------------------------------------------------------------------------------------------------------------------------------------------------------------------------------------------------------------------------------------------------------------------------------------------------------------------------------------------------------------------------------------------------------------------------------------------------------------------------------------|-----------|-----------|--------|-------|-----|------|------|---------------------------------------------|
| 1201.5295                                                                                                                                                                                                                                                                                                                                                                                                                                                                                                                                                                                                                                                                                                                                                                                                               | 1200.5222 | 1200.6350 | -93.95 | 111   | -   | 121  | 0    | K.ESIVDVEGVVR.K                             |
| 1301.6583                                                                                                                                                                                                                                                                                                                                                                                                                                                                                                                                                                                                                                                                                                                                                                                                               | 1300.6510 | 1300.5250 | 96.9   | 255   | -   | 264  | 0    | K.QMCICADFEK.V                              |
| 1301.6583                                                                                                                                                                                                                                                                                                                                                                                                                                                                                                                                                                                                                                                                                                                                                                                                               | 1300.6511 | 1300.5250 | 96.9   | 255   | -   | 264  | 0    | K.QMCICADFEK.V                              |
| 1363.6659                                                                                                                                                                                                                                                                                                                                                                                                                                                                                                                                                                                                                                                                                                                                                                                                               | 1362.6586 | 1362.7256 | -49.12 | 320   | -   | 330  | 1    | K.RFQTEIQTVVK.Q                             |
| 1838.8295                                                                                                                                                                                                                                                                                                                                                                                                                                                                                                                                                                                                                                                                                                                                                                                                               | 1837.8222 | 1837.9185 | -52.39 | 394   | -   | 408  | 0    | K.YPLAVRPFYTMPDPR.N + Oxidation (M)         |
| 1939.9556                                                                                                                                                                                                                                                                                                                                                                                                                                                                                                                                                                                                                                                                                                                                                                                                               | 1938.9483 | 1938.9912 | -22.10 | 82    | -   | 99   | 0    | R.QQQFNQVQALVAVGDHASK.Q                     |
| 2004.8711                                                                                                                                                                                                                                                                                                                                                                                                                                                                                                                                                                                                                                                                                                                                                                                                               | 2003.8638 | 2003.9636 | -49.79 | 265   | -   | 281  | 1    | K.VFCIGPVFRAEDSNTHR.H                       |
| 2210.9976                                                                                                                                                                                                                                                                                                                                                                                                                                                                                                                                                                                                                                                                                                                                                                                                               | 2209.9903 | 2210.1114 | -54.77 | 123   | -   | 141  | 1    | K.VNQKIGSCSTQQDVELHVQK.I                    |
| 2351.1042                                                                                                                                                                                                                                                                                                                                                                                                                                                                                                                                                                                                                                                                                                                                                                                                               | 2350.0969 | 2350.0318 | 27.7   | 412   | -   | 431  | 1    | K.QSNSYDMFMERGEIILSGAQR.I + 2 Oxidation (M) |
| <b>No match to:</b> 842.4648, 848.4858, 850.0170, 850.4961, 853.4749, 861.0225, 864.5088, 865.9901, 868.5096, 870.5018, 876.9943, 881.9693, 882.5198, 882.5198, 892.9673, 892.9674, 908.9358, 927.4315, 951.5755, 1017.6181, 1017.6181, 1019.6312, 1033.6478, 1045.5127, 1051.6508, 1051.6508, 1131.6466, 1147.6801, 1151.6693, 1165.6774, 1165.6774, 1169.5049, 1179.5454, 1201.5295, 1301.6583, 1301.6583, 1334.8121, 1334.8121, 1417.6385, 1433.6392, 1439.6532, 1448.8452, 1475.6703, 1479.7141, 1479.7141, 1567.6675, 1593.7277, 1597.6893, 1597.6893, 1617.9797, 1673.7250, 1690.7394, 1732.0092, 1826.8557, 1848.8546, 1873.8428, 1901.1566, 1939.9556, 1993.8798, 2004.8711, 2015.1777, 2093.9248, 2111.9341, 2111.9341, 2150.9111, 2150.9111, 2233.0032, 2283.0698, 2305.0757, 2321.0444, 2753.2139, 3337.6887 |           |           |        |       |     |      |      |                                             |

19. [A0A4W2H2Q0](#) Mass: 21512 Score: 34 Expect: 57 Matches: 6

Methionine sulfoxide reductase A OS=Bos indicus x Bos taurus OX=30522 GN=MSRA PE=3 SV=1

| Observed                                                                                                                                                                                                                                                                                                                                                                                                                                                                                                                                                                                                                                                                                                                                                                                            | Mr(expt)  | Mr(calc)  | ppm    | Start | End | Miss | Ions | Peptide                     |
|-----------------------------------------------------------------------------------------------------------------------------------------------------------------------------------------------------------------------------------------------------------------------------------------------------------------------------------------------------------------------------------------------------------------------------------------------------------------------------------------------------------------------------------------------------------------------------------------------------------------------------------------------------------------------------------------------------------------------------------------------------------------------------------------------------|-----------|-----------|--------|-------|-----|------|------|-----------------------------|
| 850.4961                                                                                                                                                                                                                                                                                                                                                                                                                                                                                                                                                                                                                                                                                                                                                                                            | 849.4888  | 849.4491  | 46.8   | 1     | -   | 7    | 1    | -.MLSATRR.A + Oxidation (M) |
| 868.5096                                                                                                                                                                                                                                                                                                                                                                                                                                                                                                                                                                                                                                                                                                                                                                                            | 867.5023  | 867.4563  | 53.1   | 71    | -   | 78   | 0    | K.TGHAEEVVR.V               |
| 1826.8557                                                                                                                                                                                                                                                                                                                                                                                                                                                                                                                                                                                                                                                                                                                                                                                           | 1825.8484 | 1825.9356 | -47.75 | 21    | -   | 38   | 1    | R.MGDSAAKIVSPQALPGR.K       |
| 2150.9111                                                                                                                                                                                                                                                                                                                                                                                                                                                                                                                                                                                                                                                                                                                                                                                           | 2149.9038 | 2150.0137 | -51.08 | 173   | -   | 193  | 1    | K.DPDGYCGLGGTGVSCPLGIKK.-   |
| 2150.9111                                                                                                                                                                                                                                                                                                                                                                                                                                                                                                                                                                                                                                                                                                                                                                                           | 2149.9039 | 2150.0137 | -51.07 | 173   | -   | 193  | 1    | K.DPDGYCGLGGTGVSCPLGIKK.-   |
| 2321.0444                                                                                                                                                                                                                                                                                                                                                                                                                                                                                                                                                                                                                                                                                                                                                                                           | 2320.0371 | 2320.1699 | -57.24 | 135   | -   | 154  | 1    | K.EDYQKVLSEHGFLITTDIR.E     |
| <b>No match to:</b> 842.4648, 848.4858, 850.0170, 853.4749, 861.0225, 864.5088, 865.9901, 870.5018, 876.9943, 881.9693, 882.5198, 882.5198, 892.9673, 892.9674, 908.9358, 927.4315, 951.5755, 1017.6181, 1017.6181, 1019.6312, 1033.6478, 1045.5127, 1051.6508, 1051.6508, 1131.6466, 1147.6801, 1151.6693, 1165.6774, 1165.6774, 1169.5049, 1179.5454, 1201.5295, 1301.6583, 1301.6583, 1334.8121, 1334.8121, 1363.6659, 1417.6385, 1433.6392, 1439.6532, 1448.8452, 1475.6703, 1479.7141, 1479.7141, 1567.6675, 1593.7277, 1597.6893, 1597.6893, 1617.9797, 1673.7250, 1690.7394, 1732.0092, 1826.8557, 1848.8546, 1873.8428, 1901.1566, 1939.9556, 1993.8798, 2004.8711, 2015.1777, 2093.9248, 2111.9341, 2111.9341, 2210.9976, 2233.0032, 2283.0698, 2305.0757, 2351.1042, 2753.2139, 3337.6887 |           |           |        |       |     |      |      |                             |

20. [E1BKP4](#) Mass: 84228 Score: 33 Expect: 64 Matches: 11

TANK binding kinase 1 OS=Bos taurus OX=9913 GN=TBK1 PE=4 SV=2

| Observed                                                                                                                                                                                                                                                                                                                                                                                                                                                                                                                                                                                                                                                                                                                                      | Mr(expt)  | Mr(calc)  | ppm    | Start | End | Miss | Ions | Peptide                             |
|-----------------------------------------------------------------------------------------------------------------------------------------------------------------------------------------------------------------------------------------------------------------------------------------------------------------------------------------------------------------------------------------------------------------------------------------------------------------------------------------------------------------------------------------------------------------------------------------------------------------------------------------------------------------------------------------------------------------------------------------------|-----------|-----------|--------|-------|-----|------|------|-------------------------------------|
| 850.4961                                                                                                                                                                                                                                                                                                                                                                                                                                                                                                                                                                                                                                                                                                                                      | 849.4888  | 849.4345  | 64.0   | 155   | -   | 162  | 0    | K.LTDFGAAR.E                        |
| 864.5088                                                                                                                                                                                                                                                                                                                                                                                                                                                                                                                                                                                                                                                                                                                                      | 863.5015  | 863.4753  | 30.4   | 31    | -   | 38   | 0    | K.TGDLFAIK.V                        |
| 927.4315                                                                                                                                                                                                                                                                                                                                                                                                                                                                                                                                                                                                                                                                                                                                      | 926.4242  | 926.4531  | -31.20 | 230   | -   | 236  | 1    | R.NKEVMYK.I + Oxidation (M)         |
| 1151.6693                                                                                                                                                                                                                                                                                                                                                                                                                                                                                                                                                                                                                                                                                                                                     | 1150.6620 | 1150.6135 | 42.2   | 588   | -   | 596  | 1    | K.QKLYYHATK.A                       |
| 1169.5049                                                                                                                                                                                                                                                                                                                                                                                                                                                                                                                                                                                                                                                                                                                                     | 1168.4976 | 1168.5547 | -48.82 | 714   | -   | 724  | 0    | R.FGSLTMDGGLR.N + Oxidation (M)     |
| 1201.5295                                                                                                                                                                                                                                                                                                                                                                                                                                                                                                                                                                                                                                                                                                                                     | 1200.5222 | 1200.4969 | 21.1   | 406   | -   | 416  | 0    | R.YDLGDGASMAK.A + Oxidation (M)     |
| 1593.7277                                                                                                                                                                                                                                                                                                                                                                                                                                                                                                                                                                                                                                                                                                                                     | 1592.7204 | 1592.8596 | -87.39 | 461   | -   | 473  | 1    | K.KTEVVITLDFCIR.N                   |
| 1690.7394                                                                                                                                                                                                                                                                                                                                                                                                                                                                                                                                                                                                                                                                                                                                     | 1689.7321 | 1689.7781 | -27.19 | 402   | -   | 416  | 1    | K.VHPRYDLGDGASMAK.A + Oxidation (M) |
| 1848.8546                                                                                                                                                                                                                                                                                                                                                                                                                                                                                                                                                                                                                                                                                                                                     | 1847.8473 | 1847.9788 | -71.15 | 128   | -   | 143  | 1    | R.ENGIVHRDIKPGNIMR.V                |
| 1901.1566                                                                                                                                                                                                                                                                                                                                                                                                                                                                                                                                                                                                                                                                                                                                     | 1900.1493 | 1900.0921 | 30.1   | 385   | -   | 401  | 1    | R.EPLSTIGLIYEKKSILPK.V              |
| 2305.0757                                                                                                                                                                                                                                                                                                                                                                                                                                                                                                                                                                                                                                                                                                                                     | 2304.0684 | 2304.2172 | -64.58 | 505   | -   | 525  | 1    | K.LLRLLSSQGTIETSLQDIESK.L           |
| <b>No match to:</b> 842.4648, 848.4858, 850.0170, 853.4749, 861.0225, 865.9901, 868.5096, 870.5018, 876.9943, 881.9693, 882.5198, 882.5198, 892.9673, 892.9674, 908.9358, 951.5755, 1017.6181, 1017.6181, 1019.6312, 1033.6478, 1045.5127, 1051.6508, 1051.6508, 1131.6466, 1147.6801, 1165.6774, 1165.6774, 1179.5454, 1301.6583, 1301.6583, 1334.8121, 1334.8121, 1363.6659, 1417.6385, 1433.6392, 1439.6532, 1448.8452, 1475.6703, 1479.7141, 1479.7141, 1567.6675, 1597.6893, 1597.6893, 1617.9797, 1673.7250, 1732.0092, 1826.8557, 1838.8295, 1873.8428, 1939.9556, 1993.8798, 2004.8711, 2015.1777, 2093.9248, 2111.9341, 2111.9341, 2150.9111, 2150.9111, 2210.9976, 2233.0032, 2283.0698, 2321.0444, 2351.1042, 2753.2139, 3337.6887 |           |           |        |       |     |      |      |                                     |

21. [A0A4W2CVJ0](#) Mass: 84228 Score: 33 Expect: 64 Matches: 11

TANK binding kinase 1 OS=Bos indicus x Bos taurus OX=30522 GN=TBK1 PE=4 SV=1

| Observed | Mr(expt) | Mr(calc) | ppm    | Start | End | Miss | Ions | Peptide                     |
|----------|----------|----------|--------|-------|-----|------|------|-----------------------------|
| 850.4961 | 849.4888 | 849.4345 | 64.0   | 155   | -   | 162  | 0    | K.LTDFGAAR.E                |
| 864.5088 | 863.5015 | 863.4753 | 30.4   | 31    | -   | 38   | 0    | K.TGDLFAIK.V                |
| 927.4315 | 926.4242 | 926.4531 | -31.20 | 230   | -   | 236  | 1    | R.NKEVMYK.I + Oxidation (M) |



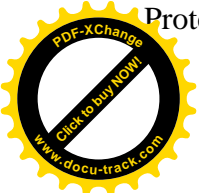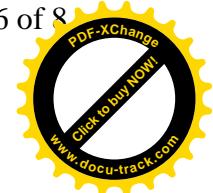

1151.6693 1150.6620 1150.6135 42.2 588 - 596 1 --- K.QKLYYHATK.A  
 1169.5049 1168.4976 1168.5547 -48.82 714 - 724 0 --- R.FGSLTMDGGLR.N + Oxidation (M)  
 1201.5295 1200.5222 1200.4969 21.1 406 - 416 0 --- R.YDLGDGDSMAK.A + Oxidation (M)  
 1593.7277 1592.7204 1592.8596 -87.39 461 - 473 1 --- K.KTEVVITLDFCIR.N  
 1690.7394 1689.7321 1689.7781 -27.19 402 - 416 1 --- K.VHPRYDLGDGDSMAK.A + Oxidation (M)  
 1848.8546 1847.8473 1847.9788 -71.15 128 - 143 1 --- R.ENGIVHRDIKPGNIMR.V  
 1901.1566 1900.1493 1900.0921 30.1 385 - 401 1 --- R.EPLSTIGLIYEKISLKP.V  
 2305.0757 2304.0684 2304.2172 -64.58 505 - 525 1 --- K.LLRSLSSQGTIETSLQDIESK.L  
**No match to:** 842.4648, 848.4858, 850.0170, 853.4749, 861.0225, 865.9901, 868.5096, 870.5018, 876.9943, 881.9693, 882.5198, 882.5198, 892.9673, 892.9674, 908.9358, 951.5755, 1017.6181, 1017.6181, 1019.6312, 1033.6478, 1045.5127, 1051.6508, 1051.6508, 1131.6466, 1147.6801, 1165.6774, 1165.6774, 1179.5454, 1301.6583, 1301.6583, 1334.8121, 1334.8121, 1363.6659, 1417.6385, 1433.6392, 1439.6532, 1448.8452, 1475.6703, 1479.7141, 1479.7141, 1567.6675, 1597.6893, 1597.6893, 1617.9797, 1673.7250, 1732.0092, 1826.8557, 1838.8295, 1873.8428, 1939.9556, 1993.8798, 2004.8711, 2015.1777, 2093.9248, 2111.9341, 2111.9341, 2150.9111, 2150.9111, 2210.9976, 2233.0032, 2283.0698, 2321.0444, 2351.1042, 2753.2139, 3337.6887

**22. A0A4W2HQ46 Mass: 39881 Score: 33 Expect: 71 Matches: 9**

N(alpha)-acetyltransferase 40, NatD catalytic subunit OS=Bos indicus x Bos taurus OX=30522 GN=NAA40 PE=4 SV=1

| Observed                                                                                                                                                                                                                                                                                                                                                                                                                                                                                                                                                                                                                                                                                                                                                          | Mr(expt)  | Mr(calc)  | ppm    | Start | End | Miss | Ions | Peptide                           |
|-------------------------------------------------------------------------------------------------------------------------------------------------------------------------------------------------------------------------------------------------------------------------------------------------------------------------------------------------------------------------------------------------------------------------------------------------------------------------------------------------------------------------------------------------------------------------------------------------------------------------------------------------------------------------------------------------------------------------------------------------------------------|-----------|-----------|--------|-------|-----|------|------|-----------------------------------|
| 853.4749                                                                                                                                                                                                                                                                                                                                                                                                                                                                                                                                                                                                                                                                                                                                                          | 852.4676  | 852.4779  | -12.08 | 279   | 285 | 0    | ---  | K.VMLTVFK.H + Oxidation (M)       |
| 1479.7141                                                                                                                                                                                                                                                                                                                                                                                                                                                                                                                                                                                                                                                                                                                                                         | 1478.7068 | 1478.6857 | 14.3   | 124   | 136 | 1    | ---  | R.LEERAAMDAVCAK.V + Oxidation (M) |
| 1479.7141                                                                                                                                                                                                                                                                                                                                                                                                                                                                                                                                                                                                                                                                                                                                                         | 1478.7068 | 1478.6857 | 14.3   | 124   | 136 | 1    | ---  | R.LEERAAMDAVCAK.V + Oxidation (M) |
| 1567.6675                                                                                                                                                                                                                                                                                                                                                                                                                                                                                                                                                                                                                                                                                                                                                         | 1566.6602 | 1566.7460 | -54.76 | 156   | 168 | 1    | ---  | K.YDRNGLNLSIECK.R                 |
| 1597.6893                                                                                                                                                                                                                                                                                                                                                                                                                                                                                                                                                                                                                                                                                                                                                         | 1596.6820 | 1596.8089 | -79.47 | 72    | 85  | 1    | ---  | R.GACAVRGRPLQCR.R                 |
| 1597.6893                                                                                                                                                                                                                                                                                                                                                                                                                                                                                                                                                                                                                                                                                                                                                         | 1596.6821 | 1596.8089 | -79.46 | 72    | 85  | 1    | ---  | R.GACAVRGRPLQCR.R                 |
| 1848.8546                                                                                                                                                                                                                                                                                                                                                                                                                                                                                                                                                                                                                                                                                                                                                         | 1847.8473 | 1847.9305 | -45.03 | 170   | 186 | 0    | ---  | R.VSGLEPATVDWAFDLTK.T             |
| 2004.8711                                                                                                                                                                                                                                                                                                                                                                                                                                                                                                                                                                                                                                                                                                                                                         | 2003.8638 | 2004.0316 | -83.74 | 169   | 186 | 1    | ---  | K.RVSGLEPATVDWAFDLTK.T            |
| 2351.1042                                                                                                                                                                                                                                                                                                                                                                                                                                                                                                                                                                                                                                                                                                                                                         | 2350.0969 | 2350.1627 | -28.00 | 170   | 190 | 1    | ---  | R.VSGLEPATVDWAFDLTKTNMR.T         |
| <b>No match to:</b> 842.4648, 848.4858, 850.0170, 850.4961, 861.0225, 864.5088, 865.9901, 868.5096, 870.5018, 876.9943, 881.9693, 882.5198, 882.5198, 892.9673, 892.9674, 908.9358, 927.4315, 951.5755, 1017.6181, 1017.6181, 1019.6312, 1033.6478, 1045.5127, 1051.6508, 1051.6508, 1131.6466, 1147.6801, 1151.6693, 1165.6774, 1165.6774, 1169.5049, 1179.5454, 1201.5295, 1301.6583, 1301.6583, 1334.8121, 1334.8121, 1363.6659, 1417.6385, 1433.6392, 1439.6532, 1448.8452, 1475.6703, 1593.7277, 1617.9797, 1673.7250, 1690.7394, 1732.0092, 1826.8557, 1838.8295, 1873.8428, 1901.1566, 1939.9556, 1993.8798, 2015.1777, 2093.9248, 2111.9341, 2111.9341, 2150.9111, 2150.9111, 2210.9976, 2233.0032, 2283.0698, 2305.0757, 2321.0444, 2753.2139, 3337.6887 |           |           |        |       |     |      |      |                                   |

**23. A5PKK1 Mass: 27850 Score: 33 Expect: 72 Matches: 7**

N(alpha)-acetyltransferase 40, NatD catalytic subunit OS=Bos taurus OX=9913 GN=NAA40 PE=2 SV=1

| Observed                                                                                                                                                                                                                                                                                                                                                                                                                                                                                                                                                                                                                                                                                                                                                                                | Mr(expt)  | Mr(calc)  | ppm    | Start | End | Miss | Ions | Peptide                           |
|-----------------------------------------------------------------------------------------------------------------------------------------------------------------------------------------------------------------------------------------------------------------------------------------------------------------------------------------------------------------------------------------------------------------------------------------------------------------------------------------------------------------------------------------------------------------------------------------------------------------------------------------------------------------------------------------------------------------------------------------------------------------------------------------|-----------|-----------|--------|-------|-----|------|------|-----------------------------------|
| 853.4749                                                                                                                                                                                                                                                                                                                                                                                                                                                                                                                                                                                                                                                                                                                                                                                | 852.4676  | 852.4779  | -12.08 | 171   | 177 | 0    | ---  | K.VMLTVFK.H + Oxidation (M)       |
| 1479.7141                                                                                                                                                                                                                                                                                                                                                                                                                                                                                                                                                                                                                                                                                                                                                                               | 1478.7068 | 1478.6857 | 14.3   | 16    | 28  | 1    | ---  | R.LEERAAMDAVCAK.V + Oxidation (M) |
| 1479.7141                                                                                                                                                                                                                                                                                                                                                                                                                                                                                                                                                                                                                                                                                                                                                                               | 1478.7068 | 1478.6857 | 14.3   | 16    | 28  | 1    | ---  | R.LEERAAMDAVCAK.V + Oxidation (M) |
| 1567.6675                                                                                                                                                                                                                                                                                                                                                                                                                                                                                                                                                                                                                                                                                                                                                                               | 1566.6602 | 1566.7460 | -54.76 | 48    | 60  | 1    | ---  | K.YDRNGLNLSIECK.R                 |
| 1848.8546                                                                                                                                                                                                                                                                                                                                                                                                                                                                                                                                                                                                                                                                                                                                                                               | 1847.8473 | 1847.9305 | -45.03 | 62    | 78  | 0    | ---  | R.VSGLEPATVDWAFDLTK.T             |
| 2004.8711                                                                                                                                                                                                                                                                                                                                                                                                                                                                                                                                                                                                                                                                                                                                                                               | 2003.8638 | 2004.0316 | -83.74 | 61    | 78  | 1    | ---  | K.RVSGLEPATVDWAFDLTK.T            |
| 2351.1042                                                                                                                                                                                                                                                                                                                                                                                                                                                                                                                                                                                                                                                                                                                                                                               | 2350.0969 | 2350.1627 | -28.00 | 62    | 82  | 1    | ---  | R.VSGLEPATVDWAFDLTKTNMR.T         |
| <b>No match to:</b> 842.4648, 848.4858, 850.0170, 850.4961, 861.0225, 864.5088, 865.9901, 868.5096, 870.5018, 876.9943, 881.9693, 882.5198, 882.5198, 892.9673, 892.9674, 908.9358, 927.4315, 951.5755, 1017.6181, 1017.6181, 1019.6312, 1033.6478, 1045.5127, 1051.6508, 1051.6508, 1131.6466, 1147.6801, 1151.6693, 1165.6774, 1165.6774, 1169.5049, 1179.5454, 1201.5295, 1301.6583, 1301.6583, 1334.8121, 1334.8121, 1363.6659, 1417.6385, 1433.6392, 1439.6532, 1448.8452, 1475.6703, 1593.7277, 1597.6893, 1597.6893, 1617.9797, 1673.7250, 1690.7394, 1732.0092, 1826.8557, 1838.8295, 1873.8428, 1901.1566, 1939.9556, 1993.8798, 2015.1777, 2093.9248, 2111.9341, 2111.9341, 2150.9111, 2150.9111, 2210.9976, 2233.0032, 2283.0698, 2305.0757, 2321.0444, 2753.2139, 3337.6887 |           |           |        |       |     |      |      |                                   |

**24. A0A3Q1M909 Mass: 23483 Score: 32 Expect: 81 Matches: 6**

Mitochondrial peptide methionine sulfoxide reductase OS=Bos taurus OX=9913 GN=MSRA PE=1 SV=1

| Observed                                                                                                                                                                                                                                                                                                                                                                                                                                                                                                                                                                                                                                                                                                                                                                                            | Mr(expt)  | Mr(calc)  | ppm    | Start | End | Miss | Ions | Peptide                    |
|-----------------------------------------------------------------------------------------------------------------------------------------------------------------------------------------------------------------------------------------------------------------------------------------------------------------------------------------------------------------------------------------------------------------------------------------------------------------------------------------------------------------------------------------------------------------------------------------------------------------------------------------------------------------------------------------------------------------------------------------------------------------------------------------------------|-----------|-----------|--------|-------|-----|------|------|----------------------------|
| 850.4961                                                                                                                                                                                                                                                                                                                                                                                                                                                                                                                                                                                                                                                                                                                                                                                            | 849.4888  | 849.4491  | 46.8   | 1     | 7   | 1    | ---  | -MLSATRR.A + Oxidation (M) |
| 868.5096                                                                                                                                                                                                                                                                                                                                                                                                                                                                                                                                                                                                                                                                                                                                                                                            | 867.5023  | 867.4563  | 53.1   | 88    | 95  | 0    | ---  | K.TGHAEEVVR.V              |
| 1826.8557                                                                                                                                                                                                                                                                                                                                                                                                                                                                                                                                                                                                                                                                                                                                                                                           | 1825.8484 | 1825.9356 | -47.75 | 21    | 38  | 1    | ---  | R.MGDSAAKIVSQEALPGR.K      |
| 2150.9111                                                                                                                                                                                                                                                                                                                                                                                                                                                                                                                                                                                                                                                                                                                                                                                           | 2149.9038 | 2150.0137 | -51.08 | 190   | 210 | 1    | ---  | K.DPDGYCGLGGTGVSCPLGIKK.-  |
| 2150.9111                                                                                                                                                                                                                                                                                                                                                                                                                                                                                                                                                                                                                                                                                                                                                                                           | 2149.9039 | 2150.0137 | -51.07 | 190   | 210 | 1    | ---  | K.DPDGYCGLGGTGVSCPLGIKK.-  |
| 2321.0444                                                                                                                                                                                                                                                                                                                                                                                                                                                                                                                                                                                                                                                                                                                                                                                           | 2320.0371 | 2320.1699 | -57.24 | 152   | 171 | 1    | ---  | K.EDYQKVLSEHGFLITTDIR.E    |
| <b>No match to:</b> 842.4648, 848.4858, 850.0170, 853.4749, 861.0225, 864.5088, 865.9901, 870.5018, 876.9943, 881.9693, 882.5198, 882.5198, 892.9673, 892.9674, 908.9358, 927.4315, 951.5755, 1017.6181, 1017.6181, 1019.6312, 1033.6478, 1045.5127, 1051.6508, 1051.6508, 1131.6466, 1147.6801, 1151.6693, 1165.6774, 1165.6774, 1169.5049, 1179.5454, 1201.5295, 1301.6583, 1301.6583, 1334.8121, 1334.8121, 1363.6659, 1417.6385, 1433.6392, 1439.6532, 1448.8452, 1475.6703, 1479.7141, 1479.7141, 1567.6675, 1593.7277, 1597.6893, 1597.6893, 1617.9797, 1673.7250, 1690.7394, 1732.0092, 1838.8295, 1848.8546, 1873.8428, 1901.1566, 1939.9556, 1993.8798, 2004.8711, 2015.1777, 2093.9248, 2111.9341, 2111.9341, 2210.9976, 2233.0032, 2283.0698, 2305.0757, 2351.1042, 2753.2139, 3337.6887 |           |           |        |       |     |      |      |                            |

**25. A0A4W2HSU8 Mass: 23483 Score: 32 Expect: 81 Matches: 6**

Methionine sulfoxide reductase A OS=Bos indicus x Bos taurus OX=30522 GN=MSRA PE=3 SV=1

| Observed                                                                                                                                                                                                                                                                                                                                                                                                                                                                                                                                                                                                                                                                                                                                                                                            | Mr(expt)  | Mr(calc)  | ppm    | Start | End | Miss | Ions | Peptide                    |
|-----------------------------------------------------------------------------------------------------------------------------------------------------------------------------------------------------------------------------------------------------------------------------------------------------------------------------------------------------------------------------------------------------------------------------------------------------------------------------------------------------------------------------------------------------------------------------------------------------------------------------------------------------------------------------------------------------------------------------------------------------------------------------------------------------|-----------|-----------|--------|-------|-----|------|------|----------------------------|
| 850.4961                                                                                                                                                                                                                                                                                                                                                                                                                                                                                                                                                                                                                                                                                                                                                                                            | 849.4888  | 849.4491  | 46.8   | 1     | 7   | 1    | ---  | -MLSATRR.A + Oxidation (M) |
| 868.5096                                                                                                                                                                                                                                                                                                                                                                                                                                                                                                                                                                                                                                                                                                                                                                                            | 867.5023  | 867.4563  | 53.1   | 88    | 95  | 0    | ---  | K.TGHAEEVVR.V              |
| 1826.8557                                                                                                                                                                                                                                                                                                                                                                                                                                                                                                                                                                                                                                                                                                                                                                                           | 1825.8484 | 1825.9356 | -47.75 | 21    | 38  | 1    | ---  | R.MGDSAAKIVSQEALPGR.K      |
| 2150.9111                                                                                                                                                                                                                                                                                                                                                                                                                                                                                                                                                                                                                                                                                                                                                                                           | 2149.9038 | 2150.0137 | -51.08 | 190   | 210 | 1    | ---  | K.DPDGYCGLGGTGVSCPLGIKK.-  |
| 2150.9111                                                                                                                                                                                                                                                                                                                                                                                                                                                                                                                                                                                                                                                                                                                                                                                           | 2149.9039 | 2150.0137 | -51.07 | 190   | 210 | 1    | ---  | K.DPDGYCGLGGTGVSCPLGIKK.-  |
| 2321.0444                                                                                                                                                                                                                                                                                                                                                                                                                                                                                                                                                                                                                                                                                                                                                                                           | 2320.0371 | 2320.1699 | -57.24 | 152   | 171 | 1    | ---  | K.EDYQKVLSEHGFLITTDIR.E    |
| <b>No match to:</b> 842.4648, 848.4858, 850.0170, 853.4749, 861.0225, 864.5088, 865.9901, 870.5018, 876.9943, 881.9693, 882.5198, 882.5198, 892.9673, 892.9674, 908.9358, 927.4315, 951.5755, 1017.6181, 1017.6181, 1019.6312, 1033.6478, 1045.5127, 1051.6508, 1051.6508, 1131.6466, 1147.6801, 1151.6693, 1165.6774, 1165.6774, 1169.5049, 1179.5454, 1201.5295, 1301.6583, 1301.6583, 1334.8121, 1334.8121, 1363.6659, 1417.6385, 1433.6392, 1439.6532, 1448.8452, 1475.6703, 1479.7141, 1479.7141, 1567.6675, 1593.7277, 1597.6893, 1597.6893, 1617.9797, 1673.7250, 1690.7394, 1732.0092, 1838.8295, 1848.8546, 1873.8428, 1901.1566, 1939.9556, 1993.8798, 2004.8711, 2015.1777, 2093.9248, 2111.9341, 2111.9341, 2210.9976, 2233.0032, 2283.0698, 2305.0757, 2351.1042, 2753.2139, 3337.6887 |           |           |        |       |     |      |      |                            |

**26. A0A3Q1LVV9 Mass: 13591 Score: 32 Expect: 85 Matches: 6**

RNA\_pol\_L\_2 domain-containing protein OS=Bos taurus OX=9913 PE=4 SV=1

| Observed  | Mr(expt)  | Mr(calc)  | ppm    | Start | End | Miss | Ions | Peptide             |
|-----------|-----------|-----------|--------|-------|-----|------|------|---------------------|
| 1033.6478 | 1032.6405 | 1032.6305 | 9.74   | 57    | 64  | 1    | ---  | K.VRRPLQHK.T        |
| 1045.5127 | 1044.5054 | 1044.5426 | -35.62 | 110   | 119 | 0    | ---  | K.MSGGLHLALF.-      |
| 1334.8121 | 1333.8048 | 1333.7466 | 43.6   | 79    | 90  | 1    | ---  | R.RLPPVPSQTSR.N     |
| 1334.8121 | 1333.8049 | 1333.7466 | 43.7   | 79    | 90  | 1    | ---  | R.RLPPVPSQTSR.N     |
| 1363.6659 | 1362.6586 | 1362.7408 | -60.31 | 47    | 58  | 1    | ---  | K.APQVQFAGYKVR.R    |
| 1690.7394 | 1689.7321 | 1689.8798 | -87.39 | 32    | 46  | 0    | ---  | K.ENHTLGNISHSQLLK.A |

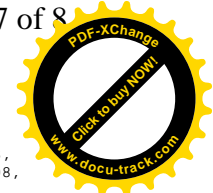

No match to: 842.4648, 848.4858, 850.0170, 850.4961, 853.4749, 861.0225, 864.5088, 865.9901, 868.5096, 870.5018, 876.9943, 881.9693, 882.5198, 882.5198, 892.9673, 892.9674, 908.9358, 927.4315, 951.5755, 1017.6181, 1017.6181, 1019.6312, 1051.6508, 1051.6508, 1131.6466, 1147.6801, 1151.6693, 1165.6774, 1165.6774, 1169.5049, 1179.5454, 1201.5295, 1301.6583, 1301.6583, 1417.6385, 1433.6392, 1439.6532, 1448.8452, 1475.6703, 1479.7141, 1479.7141, 1567.6675, 1593.7277, 1597.6893, 1597.6893, 1617.9797, 1673.7250, 1732.0092, 1826.8557, 1838.8295, 1848.8546, 1873.8428, 1901.1566, 1939.9556, 1993.8798, 2004.8711, 2015.1777, 2093.9248, 2111.9341, 2111.9341, 2150.9111, 2150.9111, 2210.9976, 2233.0032, 2283.0698, 2305.0757, 2321.0444, 2351.1042, 2753.2139, 3337.6887

27. [A0A4W2E767](#) Mass: 68716 Score: 32 Expect: 85 Matches: 9

Acyl-CoA dehydrogenase very long chain OS=Bos indicus x Bos taurus OX=30522 GN=ACADVL PE=3 SV=1

| Observed  | Mr(expt)  | Mr(calc)  | ppm    | Start | End | Miss | Ions | Peptide                                |
|-----------|-----------|-----------|--------|-------|-----|------|------|----------------------------------------|
| 848.4858  | 847.4785  | 847.5167  | -45.09 | 166   | -   | 173  | 0    | K.GILLFGTK.A                           |
| 853.4749  | 852.4676  | 852.4202  | 55.6   | 337   | -   | 344  | 0    | K.AVDHAANR.T                           |
| 870.5018  | 869.4945  | 869.4971  | -2.93  | 82    | -   | 89   | 0    | K.ELVGPVTR.F                           |
| 1151.6693 | 1150.6620 | 1150.5540 | 93.9   | 106   | -   | 115  | 0    | R.VEETTMQGLK.E + Oxidation (M)         |
| 1169.5049 | 1168.4976 | 1168.5400 | -36.30 | 90    | -   | 99   | 0    | R.FFEEVNDAAK.N                         |
| 1417.6385 | 1416.6312 | 1416.7460 | -81.04 | 243   | -   | 256  | 1    | K.TPVTDTATGAVKEK.I                     |
| 1593.7277 | 1592.7204 | 1592.8675 | -92.31 | 435   | -   | 447  | 1    | R.IFRIFEGTNDILR.L                      |
| 1848.8546 | 1847.8473 | 1847.7926 | 29.6   | 407   | -   | 422  | 0    | K.VTDECIQIMGGMGFMK.E + 2 Oxidation (M) |
| 1873.8428 | 1872.8355 | 1872.9040 | -36.56 | 278   | -   | 294  | 1    | K.MGIKASNTAEVYFDGVR.V + Oxidation (M)  |

No match to: 842.4648, 850.0170, 850.4961, 861.0225, 864.5088, 865.9901, 868.5096, 876.9943, 881.9693, 882.5198, 882.5198, 892.9673, 892.9674, 908.9358, 927.4315, 951.5755, 1017.6181, 1017.6181, 1019.6312, 1033.6478, 1045.5127, 1051.6508, 1051.6508, 1131.6466, 1147.6801, 1165.6774, 1165.6774, 1179.5454, 1201.5295, 1301.6583, 1301.6583, 1334.8121, 1334.8121, 1363.6659, 1433.6392, 1439.6532, 1448.8452, 1475.6703, 1479.7141, 1479.7141, 1567.6675, 1597.6893, 1597.6893, 1617.9797, 1673.7250, 1690.7394, 1732.0092, 1826.8557, 1838.8295, 1901.1566, 1939.9556, 1993.8798, 2004.8711, 2015.1777, 2093.9248, 2111.9341, 2111.9341, 2150.9111, 2150.9111, 2210.9976, 2233.0032, 2283.0698, 2305.0757, 2321.0444, 2351.1042, 2753.2139, 3337.6887

28. [A0A4W2GRX4](#) Mass: 68688 Score: 32 Expect: 85 Matches: 9

Acyl-CoA dehydrogenase very long chain OS=Bos indicus x Bos taurus OX=30522 GN=ACADVL PE=3 SV=1

| Observed  | Mr(expt)  | Mr(calc)  | ppm    | Start | End | Miss | Ions | Peptide                                |
|-----------|-----------|-----------|--------|-------|-----|------|------|----------------------------------------|
| 848.4858  | 847.4785  | 847.5167  | -45.09 | 166   | -   | 173  | 0    | K.GILLFGTK.A                           |
| 853.4749  | 852.4676  | 852.4202  | 55.6   | 337   | -   | 344  | 0    | K.AVDHAANR.T                           |
| 870.5018  | 869.4945  | 869.4971  | -2.93  | 82    | -   | 89   | 0    | K.ELVGPVTR.F                           |
| 1151.6693 | 1150.6620 | 1150.5540 | 93.9   | 106   | -   | 115  | 0    | R.VEETTMQGLK.E + Oxidation (M)         |
| 1169.5049 | 1168.4976 | 1168.5400 | -36.30 | 90    | -   | 99   | 0    | R.FFEEVNDAAK.N                         |
| 1417.6385 | 1416.6312 | 1416.7460 | -81.04 | 243   | -   | 256  | 1    | K.TPVTDTATGAVKEK.I                     |
| 1593.7277 | 1592.7204 | 1592.8675 | -92.31 | 435   | -   | 447  | 1    | R.IFRIFEGTNDILR.L                      |
| 1848.8546 | 1847.8473 | 1847.7926 | 29.6   | 407   | -   | 422  | 0    | K.VTDECIQIMGGMGFMK.E + 2 Oxidation (M) |
| 1873.8428 | 1872.8355 | 1872.9040 | -36.56 | 278   | -   | 294  | 1    | K.MGIKASNTAEVYFDGVR.V + Oxidation (M)  |

No match to: 842.4648, 850.0170, 850.4961, 861.0225, 864.5088, 865.9901, 868.5096, 876.9943, 881.9693, 882.5198, 882.5198, 892.9673, 892.9674, 908.9358, 927.4315, 951.5755, 1017.6181, 1017.6181, 1019.6312, 1033.6478, 1045.5127, 1051.6508, 1051.6508, 1131.6466, 1147.6801, 1165.6774, 1165.6774, 1179.5454, 1201.5295, 1301.6583, 1301.6583, 1334.8121, 1334.8121, 1363.6659, 1433.6392, 1439.6532, 1448.8452, 1475.6703, 1479.7141, 1479.7141, 1567.6675, 1597.6893, 1597.6893, 1617.9797, 1673.7250, 1690.7394, 1732.0092, 1826.8557, 1838.8295, 1901.1566, 1939.9556, 1993.8798, 2004.8711, 2015.1777, 2093.9248, 2111.9341, 2111.9341, 2150.9111, 2150.9111, 2210.9976, 2233.0032, 2283.0698, 2305.0757, 2321.0444, 2351.1042, 2753.2139, 3337.6887

29. [A0A3Q1LG54](#) Mass: 89438 Score: 32 Expect: 91 Matches: 14

Protein phosphatase 1 regulatory subunit 21 OS=Bos taurus OX=9913 GN=PPP1R21 PE=4 SV=1

| Observed  | Mr(expt)  | Mr(calc)  | ppm    | Start | End | Miss | Ions | Peptide                                |
|-----------|-----------|-----------|--------|-------|-----|------|------|----------------------------------------|
| 842.4648  | 841.4575  | 841.5134  | -66.34 | 70    | -   | 76   | 1    | R.NLQLAKR.V                            |
| 853.4749  | 852.4676  | 852.4453  | 26.1   | 139   | -   | 145  | 0    | K.HVEAELR.S                            |
| 1033.6478 | 1032.6405 | 1032.5451 | 92.4   | 187   | -   | 195  | 1    | K.SQTLEKEAK.E                          |
| 1131.6466 | 1130.6393 | 1130.5931 | 40.9   | 763   | -   | 771  | 1    | K.QREEIDTLK.M                          |
| 1147.6801 | 1146.6728 | 1146.6357 | 32.4   | 553   | -   | 562  | 1    | R.RVLLSSTESR.E                         |
| 1165.6774 | 1164.6701 | 1164.5696 | 86.3   | 713   | -   | 722  | 1    | K.SKEALTEEMK.V                         |
| 1165.6774 | 1164.6701 | 1164.5696 | 86.3   | 713   | -   | 722  | 1    | K.SKEALTEEMK.V                         |
| 1301.6583 | 1300.6510 | 1300.6623 | -8.65  | 34    | -   | 46   | 0    | K.GVVDEQANSALK.E                       |
| 1301.6583 | 1300.6511 | 1300.6623 | -8.63  | 34    | -   | 46   | 0    | K.GVVDEQANSALK.E                       |
| 1417.6385 | 1416.6312 | 1416.7395 | -76.41 | 199   | -   | 209  | 1    | R.LRTEECQLQLK.N                        |
| 1567.6675 | 1566.6602 | 1566.7613 | -64.50 | 693   | -   | 705  | 1    | K.SVHFYAEACRLSK.R                      |
| 1617.9797 | 1616.9724 | 1616.8734 | 61.3   | 608   | -   | 623  | 1    | K.LKSTSSGQVVGVAQEK.A                   |
| 2004.8711 | 2003.8638 | 2003.9332 | -34.64 | 508   | -   | 525  | 0    | K.TGSGFISPLSAECMLQYK.K + Oxidation (M) |
| 2015.1777 | 2014.1704 | 2014.0346 | 67.4   | 343   | -   | 358  | 1    | K.LKTFSEHLTSYICFLR.K                   |

No match to: 848.4858, 850.0170, 850.4961, 861.0225, 864.5088, 865.9901, 868.5096, 870.5018, 876.9943, 881.9693, 882.5198, 882.5198, 892.9673, 892.9674, 908.9358, 927.4315, 951.5755, 1017.6181, 1017.6181, 1019.6312, 1045.5127, 1051.6508, 1051.6508, 1151.6693, 1169.5049, 1179.5454, 1201.5295, 1334.8121, 1334.8121, 1363.6659, 1433.6392, 1439.6532, 1448.8452, 1475.6703, 1479.7141, 1479.7141, 1593.7277, 1597.6893, 1597.6893, 1673.7250, 1690.7394, 1732.0092, 1826.8557, 1838.8295, 1848.8546, 1873.8428, 1901.1566, 1939.9556, 1993.8798, 2093.9248, 2111.9341, 2111.9341, 2150.9111, 2150.9111, 2210.9976, 2233.0032, 2283.0698, 2305.0757, 2321.0444, 2351.1042, 2753.2139, 3337.6887

30. [A5D7H6](#) Mass: 88869 Score: 32 Expect: 95 Matches: 14

KLRAQ1 protein OS=Bos taurus OX=9913 GN=PPP1R21 PE=2 SV=1

| Observed  | Mr(expt)  | Mr(calc)  | ppm    | Start | End | Miss | Ions | Peptide                                |
|-----------|-----------|-----------|--------|-------|-----|------|------|----------------------------------------|
| 842.4648  | 841.4575  | 841.5134  | -66.34 | 66    | -   | 72   | 1    | R.NLQLAKR.V                            |
| 853.4749  | 852.4676  | 852.4453  | 26.1   | 135   | -   | 141  | 0    | K.HVEAELR.S                            |
| 1033.6478 | 1032.6405 | 1032.5451 | 92.4   | 183   | -   | 191  | 1    | K.SQTLEKEAK.E                          |
| 1131.6466 | 1130.6393 | 1130.5931 | 40.9   | 759   | -   | 767  | 1    | K.QREEIDTLK.M                          |
| 1147.6801 | 1146.6728 | 1146.6357 | 32.4   | 549   | -   | 558  | 1    | R.RVLLSSTESR.E                         |
| 1165.6774 | 1164.6701 | 1164.5696 | 86.3   | 709   | -   | 718  | 1    | K.SKEALTEEMK.V                         |
| 1165.6774 | 1164.6701 | 1164.5696 | 86.3   | 709   | -   | 718  | 1    | K.SKEALTEEMK.V                         |
| 1301.6583 | 1300.6510 | 1300.6623 | -8.65  | 30    | -   | 42   | 0    | K.GVVDEQANSALK.E                       |
| 1301.6583 | 1300.6511 | 1300.6623 | -8.63  | 30    | -   | 42   | 0    | K.GVVDEQANSALK.E                       |
| 1417.6385 | 1416.6312 | 1416.7395 | -76.41 | 195   | -   | 205  | 1    | R.LRTEECQLQLK.N                        |
| 1567.6675 | 1566.6602 | 1566.7613 | -64.50 | 689   | -   | 701  | 1    | K.SVHFYAEACRLSK.R                      |
| 1617.9797 | 1616.9724 | 1616.8734 | 61.3   | 604   | -   | 619  | 1    | K.LKSTSSGQVVGVAQEK.A                   |
| 2004.8711 | 2003.8638 | 2003.9332 | -34.64 | 504   | -   | 521  | 0    | K.TGSGFISPLSAECMLQYK.K + Oxidation (M) |
| 2015.1777 | 2014.1704 | 2014.0346 | 67.4   | 339   | -   | 354  | 1    | K.LKTFSEHLTSYICFLR.K                   |

No match to: 848.4858, 850.0170, 850.4961, 861.0225, 864.5088, 865.9901, 868.5096, 870.5018, 876.9943, 881.9693, 882.5198, 882.5198, 892.9673, 892.9674, 908.9358, 927.4315, 951.5755, 1017.6181, 1017.6181, 1019.6312, 1045.5127, 1051.6508, 1051.6508, 1151.6693, 1169.5049, 1179.5454, 1201.5295, 1334.8121, 1334.8121, 1363.6659, 1433.6392, 1439.6532, 1448.8452, 1475.6703, 1479.7141, 1479.7141, 1593.7277, 1597.6893, 1597.6893, 1673.7250, 1690.7394, 1732.0092, 1826.8557, 1838.8295, 1848.8546, 1873.8428, 1901.1566, 1939.9556, 1993.8798, 2093.9248, 2111.9341, 2111.9341, 2150.9111, 2150.9111, 2210.9976, 2233.0032, 2283.0698, 2305.0757, 2321.0444, 2351.1042, 2753.2139, 3337.6887

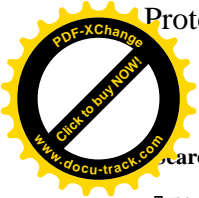

## Search Parameters

Type of search : Sequence Query  
Enzyme : Trypsin  
Fixed modifications : [Carbamidomethyl \(C\)](#)  
Variable modifications : [Oxidation \(M\)](#)  
Mass values : Monoisotopic  
Protein Mass : Unrestricted  
Peptide Mass Tolerance :  $\pm 100$  ppm  
Fragment Mass Tolerance :  $\pm 0.3$  Da  
Max Missed Cleavages : 1  
Instrument type : MALDI-TOF-TOF

Query1 (842.4648,1+): <no title>  
Query2 (848.4858,1+): <no title>  
Query3 (850.0170,1+): <no title>  
Query4 (850.4961,1+): <no title>  
Query5 (853.4749,1+): <no title>  
Query6 (861.0225,1+): <no title>  
Query7 (864.5088,1+): <no title>  
Query8 (865.9901,1+): <no title>  
Query9 (868.5096,1+): <no title>  
Query10 (870.5018,1+): <no title>  
Query11 (876.9943,1+): <no title>  
Query12 (881.9693,1+): <no title>  
Query13 (882.5198,1+): Locus:1..14.0.3  
Query14 (882.5198,1+): <no title>  
Query15 (892.9673,1+): <no title>  
Query16 (892.9674,1+): Locus:1..14.0.10  
Query17 (908.9358,1+): <no title>  
Query18 (927.4315,1+): <no title>  
Query19 (951.5755,1+): <no title>  
Query20 (1017.6181,1+): <no title>  
Query21 (1017.6181,1+): Locus:1..14.0.11  
Query22 (1019.6312,1+): <no title>  
Query23 (1033.6478,1+): <no title>  
Query24 (1045.5127,1+): <no title>  
Query25 (1051.6508,1+): Locus:1..14.0.5  
Query26 (1051.6508,1+): <no title>  
Query27 (1131.6466,1+): <no title>  
Query28 (1147.6801,1+): <no title>  
Query29 (1151.6693,1+): <no title>  
Query30 (1165.6774,1+): Locus:1..14.0.6  
Query31 (1165.6774,1+): <no title>  
Query32 (1169.5049,1+): <no title>  
Query33 (1179.5454,1+): <no title>  
Query34 (1201.5295,1+): <no title>  
Query35 (1301.6583,1+): <no title>  
Query36 (1301.6583,1+): Locus:1..14.0.4  
Query37 (1334.8121,1+): <no title>  
Query38 (1334.8121,1+): Locus:1..14.0.7  
Query39 (1363.6659,1+): <no title>  
Query40 (1417.6385,1+): <no title>  
Query41 (1433.6392,1+): <no title>  
Query42 (1439.6532,1+): <no title>  
Query43 (1448.8452,1+): <no title>  
Query44 (1475.6703,1+): <no title>  
Query45 (1479.7141,1+): <no title>  
Query46 (1479.7141,1+): Locus:1..14.0.9  
Query47 (1567.6675,1+): <no title>  
Query48 (1593.7277,1+): <no title>  
Query49 (1597.6893,1+): <no title>  
Query50 (1597.6893,1+): Locus:1..14.0.1  
Query51 (1617.9797,1+): <no title>  
Query52 (1673.7250,1+): <no title>  
Query53 (1690.7394,1+): <no title>  
Query54 (1732.0092,1+): <no title>  
Query55 (1826.8557,1+): <no title>  
Query56 (1838.8295,1+): <no title>  
Query57 (1848.8546,1+): <no title>  
Query58 (1873.8428,1+): <no title>  
Query59 (1901.1566,1+): <no title>  
Query60 (1939.9556,1+): <no title>  
Query61 (1993.8798,1+): <no title>  
Query62 (2004.8711,1+): <no title>  
Query63 (2015.1777,1+): <no title>  
Query64 (2093.9248,1+): <no title>  
Query65 (2111.9341,1+): Locus:1..14.0.2  
Query66 (2111.9341,1+): <no title>  
Query67 (2150.9111,1+): <no title>  
Query68 (2150.9111,1+): Locus:1..14.0.12  
Query69 (2210.9976,1+): <no title>  
Query70 (2233.0032,1+): <no title>  
Query71 (2283.0698,1+): <no title>  
Query72 (2305.0757,1+): <no title>  
Query73 (2321.0444,1+): <no title>  
Query74 (2351.1042,1+): <no title>  
Query75 (2753.2139,1+): <no title>  
Query76 (3337.6887,1+): <no title>

Mascot: <http://www.matrixscience.com/>
