# Supplementary material for: Alpha-2-Macroglobulin as a New Promising Biomarker Improving the Diagnostic Sensitivity of Bovine Paratuberculosis
Source: Frontiers journal article supplement (doi:10.3389/fvets.2021.637716), 2021-03-05
Supplement: Data_Sheet_1.zip [file Data_Sheet_1.zip]

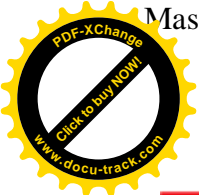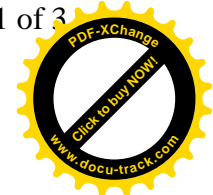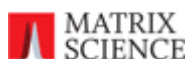

# MASCOT Search Results

## Protein View: F1MMD7

Inter-alpha-trypsin inhibitor heavy chain H4 OS=Bos taurus OX=9913  
GN=ITIH4 PE=4 SV=3

Database: Uniprot\_bovine  
Score: 74  
Expect: 0.005  
Nominal mass ( $M_r$ ): 101620  
Calculated pI: 6.22

Sequence similarity is available as [an NCBI BLAST search of F1MMD7 against nr](#).

## Search parameters

Enzyme: Trypsin: cuts C-term side of KR unless next residue is P.  
Fixed modifications: [Carbamidomethyl \(C\)](#)  
Variable modifications: [Oxidation \(M\)](#)

Protein sequence coverage: 12%

Matched peptides shown in **bold red**.

|     |                     |                   |                    |                   |                    |
|-----|---------------------|-------------------|--------------------|-------------------|--------------------|
| 1   | MKTPAPGRIH          | SIVLVLLSLA        | VLQTSKAQKV         | QNDIDIYSLT        | VDSKVSSRFA         |
| 51  | HTVITSRVVN          | KADAVREATF        | QMELPKKAFI         | TNFSMVIDGV        | TYPGNIKEKA         |
| 101 | AAQEYQYSAAV         | ARGESAGLVR        | ATGRKTEQFQ         | VSVSVAPAAK        | <b>VTFELVYEEL</b>  |
| 151 | <b>LAR</b> HLAGAYEL | LLKVRPQQLV        | KHLQMDIHIF         | EPQGISFLET        | ESTFMTNKLA         |
| 201 | EALTTSQNKI          | KAHVRFKPTL        | SQQQKYPEKQ         | <b>DTVLDGSFIV</b> | <b>RYDVRPLSG</b>   |
| 251 | GSIQIENGYF          | VHYFAPDSL         | TIPKNVIFVI         | <b>DKSGSMMGRK</b> | IKQTREALIK         |
| 301 | ILDDLSPHDQ          | FDLISFSSEA        | TTWKPLLVPA         | STENVNEAKS        | YATGIQAQGG         |
| 351 | TNINDAMLMA          | VQLEKANQE         | ELLPEGSITL         | IILLTDGDPT        | VGETNPLNIQ         |
| 401 | KNVRKAINGQ          | HSLFCLGFGF        | DVSYAFLEKM         | <b>ALENGGLARR</b> | IYEDSDSALQ         |
| 451 | LQDFYQEVAN          | PLMTSVAFEY        | PSNAVESVTQ         | DTFRVFFKGS        | ELVVAGK <b>LRE</b> |
| 501 | <b>QSPDVLLAQI</b>   | <b>RGQLHRENIT</b> | YMMMSHVAEQ         | EEMFRSPKYI        | <b>FHSFIERLWA</b>  |
| 551 | YLTIQQLLEQ          | MVSALDAEKQ        | ALEARALSLS         | LSYSFVTPLT        | SMVITKPEGQ         |
| 601 | EQSQVAEKPV          | EDES <b>RSRVY</b> | <b>LGPMR</b> FGHSV | GDRTSRKPGG        | GLKLLNGTPL         |
| 651 | FGPPGPPAAA          | SPFHRMTSRL        | VLPELMSPLA         | PASAPSPTSG        | PGGASHDTDF         |
| 701 | RIKGTTP TAL         | PFAPVQAPSV        | ILPLPGQSVD         | RLCVDLRRPQ        | ELVNLLSDPD         |
| 751 | QGVEVTGHFE          | TAKARFSWIE        | VTFENPQVQI         | HASPEHVMT         | RNRNSAYKW          |
| 801 | <b>KETLYSVMPG</b>   | <b>LKVTMDKEGL</b> | LLLSRPDRVT         | <b>IGLLFWDGPG</b> | <b>KGLRLLLQNT</b>  |
| 851 | <b>DRFSSHVSGT</b>   | LGQFYQDVLW        | GPLDTADDSK         | RTLKVQGRDY        | SATRELKLDY         |
| 901 | QESPPGKEIS          | CWSVEL            |                    |                   |                    |

Unformatted sequence string: [916 residues](#) (for pasting into other applications).

Sort peptides by ☒ Residue Number ☐ Increasing Mass ☐ Decreasing Mass

☐ Show predicted peptides also

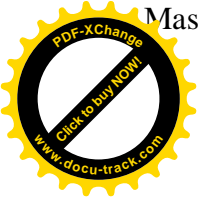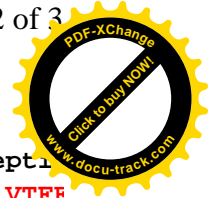

| Query              | Start - End | Observed  | Mr(expt)  | Mr(calc)  | ppm   | M | Score | Peptide |
|--------------------|-------------|-----------|-----------|-----------|-------|---|-------|---------|
| <a href="#">59</a> | 141 - 153   | 1581.7833 | 1580.7760 | 1580.8450 | -43.6 | 0 |       | K.VTFF  |
| <a href="#">60</a> | 141 - 153   | 1581.7833 | 1580.7761 | 1580.8450 | -43.6 | 0 | 35    | K.VTFF  |
| <a href="#">48</a> | 230 - 241   | 1349.6478 | 1348.6405 | 1348.6987 | -43.1 | 0 |       | K.QDTV  |
| <a href="#">5</a>  | 283 - 290   | 853.4803  | 852.4730  | 852.3946  | 92.0  | 1 |       | K.SGSM  |
| <a href="#">6</a>  | 283 - 290   | 853.4804  | 852.4731  | 852.3946  | 92.1  | 1 |       | K.SGSM  |
| <a href="#">22</a> | 430 - 439   | 1031.5133 | 1030.5060 | 1030.5229 | -16.4 | 0 |       | K.MALE  |
| <a href="#">63</a> | 498 - 511   | 1637.8650 | 1636.8577 | 1636.9260 | -41.7 | 1 |       | K.LREQ  |
| <a href="#">49</a> | 500 - 511   | 1368.6882 | 1367.6809 | 1367.7409 | -43.8 | 0 |       | R.EQSF  |
| <a href="#">38</a> | 539 - 547   | 1211.5695 | 1210.5622 | 1210.6135 | -42.3 | 0 |       | K.YIFF  |
| <a href="#">33</a> | 616 - 625   | 1151.6821 | 1150.6748 | 1150.5917 | 72.2  | 1 |       | R.GSRV  |
|                    |             |           |           |           |       |   |       | +       |
|                    |             |           |           |           |       |   |       | Oxidat: |
|                    |             |           |           |           |       |   |       | (M)     |
| <a href="#">1</a>  | 619 - 625   | 835.4214  | 834.4141  | 834.4422  | -33.6 | 0 |       | R.VYLG  |
| <a href="#">58</a> | 800 - 812   | 1567.6902 | 1566.6829 | 1566.8116 | -82.1 | 1 |       | K.WKET  |
|                    |             |           |           |           |       |   |       | +       |
|                    |             |           |           |           |       |   |       | Oxidat: |
|                    |             |           |           |           |       |   |       | (M)     |
| <a href="#">51</a> | 829 - 841   | 1402.7100 | 1401.7027 | 1401.7657 | -44.9 | 0 |       | R.VTIC  |
| <a href="#">15</a> | 845 - 852   | 972.5108  | 971.5035  | 971.5400  | -37.5 | 0 |       | R.LLLQ  |

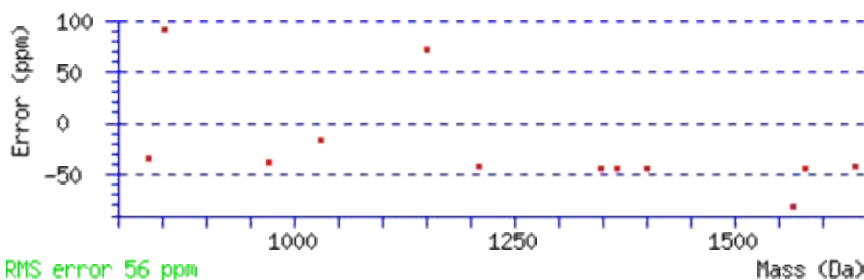

ID F1MMD7\_BOVIN Unreviewed; 916 AA.  
AC F1MMD7;  
DT 03-MAY-2011, integrated into UniProtKB/TrEMBL.  
DT 10-APR-2019, sequence version 3.  
DT 26-FEB-2020, entry version 60.  
DE SubName: Full=Inter-alpha-trypsin inhibitor heavy chain H4 {ECO:0000313|Ensembl:ENSBTAP00000010330, Name=ITIH4 {ECO:0000313|Ensembl:ENSBTAP00000010330, ECO:0000313|VGNC:VGNC:30336};  
OS Bos taurus (Bovine).  
OC Eukaryota; Metazoa; Chordata; Craniata; Vertebrata; Euteleostomi; Mammalia;  
OC Eutheria; Laurasiatheria; Artiodactyla; Ruminantia; Pecora; Bovidae;  
OC Bovinae; Bos.  
OX NCBI\_TaxID=9913 {ECO:0000313|Ensembl:ENSBTAP00000010330, ECO:0000313|Proteomes:UP000009136};  
RN [1] {ECO:0000313|Ensembl:ENSBTAP00000010330}  
RP IDENTIFICATION.  
RC STRAIN=Hereford {ECO:0000313|Ensembl:ENSBTAP00000010330};  
RG Ensembl;  
RL Submitted (MAR-2016) to UniProtKB.  
RN [2] {ECO:0000313|Ensembl:ENSBTAP00000010330, ECO:0000313|Proteomes:UP000009136};  
RP NUCLEOTIDE SEQUENCE [LARGE SCALE GENOMIC DNA].  
RC STRAIN=Hereford {ECO:0000313|Ensembl:ENSBTAP00000010330, ECO:0000313|Proteomes:UP000009136};  
RA Rosen B.D., Bickhart D.M., Koren S., Schnabel R.D., Hall R., Zimin A., Dreischer C., Schultheiss S., Schroeder S.G., Elisk C.G., Couldrey C., Liu G.E., Van Tassell C.P., Phillippy A.M., Smith T.P.L., Medrano J.F.;  
RT "ARS-UCD1.2.";  
RL Submitted (MAR-2018) to the EMBL/GenBank/DDBJ databases.  
CC -----  
CC Copyrighted by the UniProt Consortium, see <https://www.uniprot.org/terms>

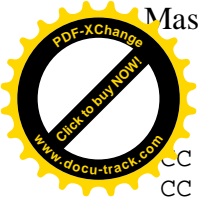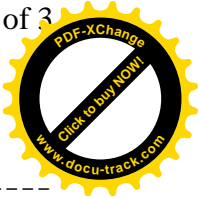

CC Distributed under the Creative Commons Attribution (CC BY 4.0) License  
CC -----  
DR PRIDE; F1MMD7; -.  
DR Ensembl; ENSBTAT00000010330; ENSBTAP00000010330; ENSBTAG00000007850.  
DR VGNC; VGNC:30336; ITIH4.  
DR eggNOG; ENOG410IEJB; Eukaryota.  
DR eggNOG; COG2304; LUCA.  
DR GeneTree; ENSGT00940000161039; -.  
DR HOGENOM; CLU\_008101\_0\_0\_1; -.  
DR OrthoDB; 955432at2759; -.  
DR TreeFam; TF328982; -.  
DR Reactome; R-BTA-114608; Platelet degranulation.  
DR Proteomes; UP000009136; Chromosome 22.  
DR Bgee; ENSBTAG00000007850; Expressed in liver and 8 other tissues.  
DR ExpressionAtlas; F1MMD7; baseline.  
DR GO; GO:0004867; F:serine-type endopeptidase inhibitor activity; IEA:InterPro.  
DR GO; GO:0030212; P:hyaluronan metabolic process; IEA:InterPro.  
DR Gene3D; 3.40.50.410; -; 1.  
DR InterPro; IPR010600; ITI\_HC\_C.  
DR InterPro; IPR013694; VIT.  
DR InterPro; IPR002035; VWF\_A.  
DR InterPro; IPR036465; vWFA\_dom\_sf.  
DR Pfam; PF06668; ITI\_HC\_C; 1.  
DR Pfam; PF08487; VIT; 1.  
DR Pfam; PF00092; VWA; 1.  
DR SMART; SM00609; VIT; 1.  
DR SMART; SM00327; VWA; 1.  
DR SUPFAM; SSF53300; SSF53300; 1.  
DR PROSITE; PS51468; VIT; 1.  
DR PROSITE; PS50234; VWFA; 1.  
PE 4: Predicted;  
KW Coiled coil {ECO:0000256|SAM:Coils};  
KW Reference proteome {ECO:0000313|Proteomes:UP000009136};  
KW Signal {ECO:0000256|SAM:SignalP}.  
FT REGION 597..616  
FT /note="Disordered"  
FT /evidence="ECO:0000256|SAM:MobiDB-lite"  
FT REGION 678..701  
FT /note="Disordered"  
FT /evidence="ECO:0000256|SAM:MobiDB-lite"  
SQ SEQUENCE 916 AA; 101513 MW; C870BDBB3392C46F CRC64;  
MKTPAPGRIH SIVLVLLSLA VLQTSKAQKV QNDIDIYSLT VDSKVSSRFA HTVITSRVVN  
KADAVREATF QMELPKKAFI TNFSMVIDGV TYPGNIKEKA AAQEQYSAAV ARGESAGLVR  
ATGRKTEQFQ VSVSVAPAAK VTFELVYEEL LARHLGAYEL LLKVRPQQLV KHLQMDIHIF  
EPQGISFLET ESTFMTNKLA EALTTSQNKI KAHVRFKPTL SQQQKYPEKQ DTVLDGSFIV  
RYDVDRPLSG GSIQIENGYF VHYFAPDSLS TIPKNVIFVI DKSGSMMGRK IKQTREALIK  
ILDDLSPHDQ FDLISFSSEA TTWKPLLVPA STENVNEAKS YATGIAQGG TNINDAMLMA  
VQLLEKANQE ELLPEGSITL IILLTDGDPT VGETNPLNIQ KNVRKAINGQ HSLFCLGFGE  
DVSYAFLEKM ALENGGLARR IYEDSDSALQ LQDFYQEVAN PLMTSVAFEY PSNAVESVTQ  
DTFRVFFKGS ELVVAGKLRE QSPDVLLAQI RGQLHRENIT YMMMSHVAEQ EEMFRSPKYI  
FHSFIERLWA YLTIQQLLEQ MVSALDAEQ ALEARALSLS LSYSFVTPLT SMVITKPEGQ  
EQSQVAEKPV EDESRGSRVY LGPMRFGHSV GDRTSRKPGG GLKLLNGTPL FGPPGPPAAA  
SPFHRMTSRL VLPPELMSPLA PASAPSPTSG PGGASHDTDF RIKGTTPTAL PFAPVQAPS  
ILPLPGQSVD RLCVDLRRPQ ELVNLLSDPD QGVEVTGHFE TAKARFSWIE VTFENPQVQI  
HASPEHVMT RNRNSAYKW KETLYSVMPG LKVTMDKEGL LLLSRPDRVT IGLLFDWGGP  
KGLRLLQNT DRFSSHVSGT LGQFYQDVLW GPLDTADDSK RTLKVQGRDY SATRELKLDY  
QESPPGKEIS CWSVEL  
//

Mascot: <http://www.matrixscience.com/>
