# Supplementary material for: Alpha-2-Macroglobulin as a New Promising Biomarker Improving the Diagnostic Sensitivity of Bovine Paratuberculosis
Source: Frontiers journal article supplement (doi:10.3389/fvets.2021.637716), 2021-03-05
Supplement: Data_Sheet_1.zip [file Data_Sheet_1.zip]

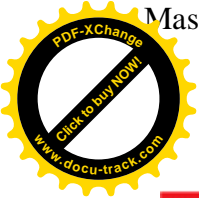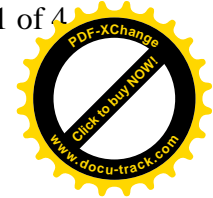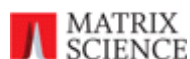

## MASCOT Search Results

## Protein View: R9QSM8

Alpha-2-macroglobulin OS=Bos taurus OX=9913 GN=A2M PE=2 SV=1

Database: Uniprot\_bovine  
Score: 90  
Expect: 0.00014  
Nominal mass ( $M_r$ ): 134613  
Calculated pI: 5.75

Sequence similarity is available as [an NCBI BLAST search of R9QSM8 against nr](#).

## Search parameters

Enzyme: Trypsin: cuts C-term side of KR unless next residue is P.  
Fixed modifications: [Carbamidomethyl \(C\)](#)  
Variable modifications: [Oxidation \(M\)](#)

Protein sequence coverage: 19%

Matched peptides shown in *bold red*.

|      |                       |                     |                    |                    |                     |
|------|-----------------------|---------------------|--------------------|--------------------|---------------------|
| 1    | MGKNKLLYPS            | LTL L L L L L L L P | TDASVSGKPQ         | YMLVLP S L L H     | TETPEKGCLL          |
| 51   | LSHLNETVTV            | SASLESVREN          | RS L F T D V V A E | <b>KDLFHCVSFT</b>  | <b>LPRSPTSQEV</b>   |
| 101  | <b>MFLTIQVKG</b> P    | TQEFKKRTTV          | LVKNEESLVF         | VQTDKPIYKP         | EQTVKFRIVL          |
| 151  | LDES F H P L N E      | LVPLVYVEDP          | KGNRIAQWQN         | LEV ENGLQQL        | TFPLSSEPFQ          |
| 201  | GSYKVVVQK <b>G</b>    | <b>SGGTA EHPFT</b>  | <b>VEEFVL PKFE</b> | VQVRMPKIIT         | ILEEEVQVSV          |
| 251  | CGLYTYGKPV            | PGRVTMNMCR          | KYRNP S N C Y G    | EESNAVCEKF         | SGELNNEGCF          |
| 301  | SQQVNTKIFQ            | LKRQEFEMKI          | EVEAKIQEEG         | TEVELTGKGA         | TEITTTITK <b>L</b>  |
| 351  | <b>SFVTVD S N L R</b> | RGIPFTGKVL          | LVDGKGVPMP         | NKVIFITANE         | ANHNSNTTTD          |
| 401  | EHGLAQFSIT            | TTKIKGTSL S         | IRVKYKD H S P      | CYGYQWLSEE         | HQDAYHSANL          |
| 451  | VFSR <b>SNSFVY</b>    | <b>LEPLPRELPC</b>   | GKTQTVQAHY         | VLKGQVLKDL         | KELVFYYLIM          |
| 501  | AKGGIVRS GT           | HTLPVEQGDM          | QGHFSMSVPV         | ESDIAPVAR <b>L</b> | <b>LIYAILPDGE</b>   |
| 551  | <b>VVGDSAR</b> Y E I  | EHCLANK <b>VGL</b>  | <b>NFSPGQS FPA</b> | <b>SQAHLRVTAS</b>  | <b>PQSLCALRAV</b>   |
| 601  | <b>DQSVLLMRPE</b>     | <b>AELSAATVYN</b>   | <b>LLPVKDLSSF</b>  | PSSVNQQEED         | NEDCISHDNV          |
| 651  | YINGIMYFPV            | SNTNEK <b>DMYS</b>  | <b>FLQDMGLKAF</b>  | TNSKIHKPKI         | CPQPEEHRIQ          |
| 701  | HHTLLASPVR            | AEMGRNR <b>DFV</b>  | <b>HFDDTSEPPT</b>  | <b>ETVRKYFPET</b>  | WIWDLVVVSS          |
| 751  | SGVHEVEVTV            | PDTIT EWKAG         | ALCLSR <b>DTGL</b> | <b>GLSPTASLRV</b>  | <b>FQPF FVELTM</b>  |
| 801  | <b>PYSVIR</b> GEAF    | TLKATVLN Y L        | PKCIRVSVQL         | EASPAFLAVP         | EKEQETYCIC          |
| 851  | GNGRQTVSWA            | VTPKSLGNVN          | FTVSAEAVES         | QELCGSEVPV         | VPEHGRKDTI          |
| 901  | IKPLLVEPEG            | LEKEVIFNSL          | LCPSVDFVFL         | GAEDGGQVLR         | HFPPAAATDT          |
| 951  | AADAHDPARP            | GAKVSESLSL          | KLPPNVVEES         | AR <b>ASFSVLGD</b> | <b>ILGSAMRNTQ</b>   |
| 1001 | NLLQMPYGC G           | EQNMARFAPN          | IYVLDYLN ET        | QQLTAE L K S K     | A I L Y L N T G Y Q |
| 1051 | RQLLYKHFDG            | SYSTFGEHRG          | NSEGNTWLTA         | FVLKSFAQAR         | GYIFIDEAHI          |
| 1101 | TEALTWLAQK            | <b>QKSNGCFRST</b>   | <b>GTLLNNAIKG</b>  | GVDDEVTL SA        | YITIALLEMP          |
| 1151 | LPVTHPVVRN            | ALFCLDSAWK          | CLKTMSMKTA         | LLDSL F H R L R    | SPWK K D N F        |

Unformatted sequence string: 1198 residues (for pasting into other applications).

Sort peptides by ☒ Residue Number ☐ Increasing Mass ☐ Decreasing Mass

Show predicted peptides also

| Query              | Start - End | Observed  | Mr(expt)  | Mr(calc)  | ppm   | M | Score | Peptide |
|--------------------|-------------|-----------|-----------|-----------|-------|---|-------|---------|
| <a href="#">48</a> | 82 - 93     | 1491.6775 | 1490.6702 | 1490.7340 | -42.8 | 0 |       | K.DLFF  |
| <a href="#">56</a> | 94 - 108    | 1707.8094 | 1706.8021 | 1706.8913 | -52.3 | 0 |       | R.SPTS  |
| <a href="#">61</a> | 210 - 228   | 2001.9189 | 2000.9116 | 2000.9844 | -36.4 | 0 |       | K.GSGG  |
| <a href="#">33</a> | 350 - 360   | 1250.6191 | 1249.6118 | 1249.6667 | -43.9 | 0 |       | K.LSFV  |
| <a href="#">34</a> | 350 - 360   | 1250.6191 | 1249.6119 | 1249.6667 | -43.8 | 0 |       | K.LSFV  |
| <a href="#">42</a> | 455 - 466   | 1421.6768 | 1420.6695 | 1420.7350 | -46.1 | 0 | 14    | R.SNSF  |
| <a href="#">43</a> | 455 - 466   | 1421.6768 | 1420.6695 | 1420.7350 | -46.1 | 0 |       | R.SNSF  |
| <a href="#">58</a> | 540 - 557   | 1900.9595 | 1899.9522 | 1900.0306 | -41.2 | 0 | 13    | R.LLIY  |
| <a href="#">59</a> | 540 - 557   | 1900.9595 | 1899.9522 | 1900.0306 | -41.2 | 0 |       | R.LLIY  |
| <a href="#">62</a> | 568 - 586   | 2012.9465 | 2011.9392 | 2012.0228 | -41.5 | 0 |       | K.VGLN  |
| <a href="#">63</a> | 568 - 586   | 2012.9465 | 2011.9393 | 2012.0228 | -41.5 | 0 |       | K.VGLN  |
| <a href="#">37</a> | 587 - 598   | 1302.6307 | 1301.6234 | 1301.6762 | -40.5 | 0 |       | R.VTAS  |
| <a href="#">75</a> | 599 - 625   | 2927.5508 | 2926.5435 | 2926.5837 | -13.7 | 0 |       | R.AVDQ  |
| <a href="#">47</a> | 667 - 678   | 1479.7271 | 1478.7198 | 1478.6422 | 52.5  | 0 |       | K.DMY   |
|                    |             |           |           |           |       |   |       | + 2     |
|                    |             |           |           |           |       |   |       | Oxidat: |
|                    |             |           |           |           |       |   |       | (M)     |
| <a href="#">60</a> | 718 - 734   | 1991.8297 | 1990.8224 | 1990.8909 | -34.4 | 0 |       | R.DEVE  |
| <a href="#">35</a> | 777 - 789   | 1287.6302 | 1286.6229 | 1286.6830 | -46.7 | 0 |       | R.DTGI  |
| <a href="#">66</a> | 790 - 806   | 2073.0088 | 2072.0015 | 2072.0805 | -38.1 | 0 |       | R.VFQE  |
| <a href="#">50</a> | 983 - 997   | 1523.7185 | 1522.7112 | 1522.7814 | -46.1 | 0 |       | R.ASFS  |
| <a href="#">19</a> | 1111 - 1118 | 996.5488  | 995.5415  | 995.4607  | 81.2  | 1 |       | K.QKSN  |
| <a href="#">27</a> | 1119 - 1129 | 1131.6523 | 1130.6450 | 1130.6295 | 13.7  | 0 |       | R.STGI  |

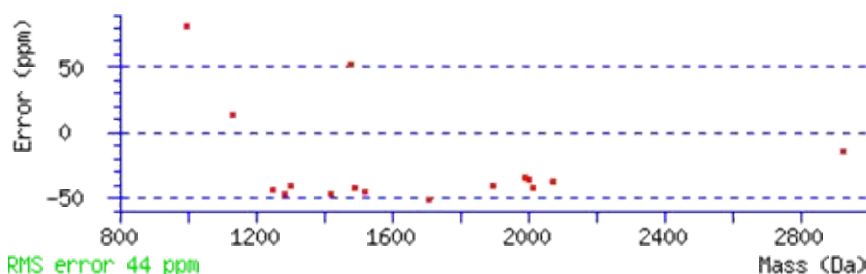

ID R9QSM8\_BOVIN Unreviewed; 1198 AA.  
 AC R9QSM8;  
 DT 18-SEP-2013, integrated into UniProtKB/TrEMBL.  
 DT 18-SEP-2013, sequence version 1.  
 DT 11-DEC-2019, entry version 23.  
 DE SubName: Full=Alpha-2-macroglobulin {ECO:0000313|EMBL:AGC26508.1};  
 GN Name=A2M {ECO:0000313|EMBL:AGC26508.1};  
 OS Bos taurus (Bovine).  
 OC Eukaryota; Metazoa; Chordata; Craniata; Vertebrata; Euteleostomi; Mammalia;  
 OC Eutheria; Laurasiatheria; Artiodactyla; Ruminantia; Pecora; Bovidae;  
 OC Bovinae; Bos.  
 OX NCBI\_TaxID=9913 {ECO:0000313|EMBL:AGC26508.1};  
 RN [1] {ECO:0000313|EMBL:AGC26508.1}  
 RP NUCLEOTIDE SEQUENCE.  
 RA Wang X.;  
 RT "Identification and characterization of novel splice variants and  
 RT expression analysis of the A2M gene in healthy and mastitis-infected  
 RT mammary tissues of Chinese Holstein dairy cow.";

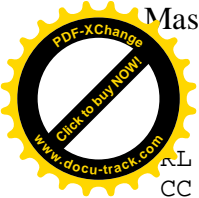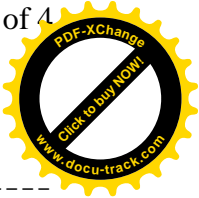

Submitted (APR-2012) to the EMBL/GenBank/DDBJ databases.

-----

Copyrighted by the UniProt Consortium, see <https://www.uniprot.org/terms>  
Distributed under the Creative Commons Attribution (CC BY 4.0) License

-----

DR EMBL; JQ918150; AGC26508.1; -; mRNA.  
DR eggNOG; ENOG410KCRI; Eukaryota.  
DR eggNOG; ENOG410XQIV; LUCA.  
DR OrthoDB; 354230at2759; -.  
DR GO; GO:0005615; C:extracellular space; IEA:InterPro.  
DR GO; GO:0004866; F:endopeptidase inhibitor activity; IEA:InterPro.  
DR Gene3D; 2.60.40.10; -; 2.  
DR InterPro; IPR011625; A2M\_N\_BRD.  
DR InterPro; IPR011626; Alpha-macroglobulin\_TED.  
DR InterPro; IPR013783; Ig-like\_fold.  
DR InterPro; IPR014756; Ig\_E-set.  
DR InterPro; IPR001599; Macroglobln\_a2.  
DR InterPro; IPR019742; MacrogloblnA2\_CS.  
DR InterPro; IPR002890; MG2.  
DR InterPro; IPR041555; MG3.  
DR InterPro; IPR040839; MG4.  
DR InterPro; IPR008930; Terpenoid\_cyclase/PrenylTrfase.  
DR InterPro; IPR010916; TonB\_box\_CS.  
DR Pfam; PF00207; A2M; 1.  
DR Pfam; PF07703; A2M\_BRD; 1.  
DR Pfam; PF01835; MG2; 1.  
DR Pfam; PF17791; MG3; 1.  
DR Pfam; PF17789; MG4; 1.  
DR Pfam; PF07678; TED\_complement; 1.  
DR SMART; SM01360; A2M; 1.  
DR SMART; SM01359; A2M\_N\_2; 1.  
DR SUPFAM; SSF48239; SSF48239; 1.  
DR SUPFAM; SSF81296; SSF81296; 1.  
DR PROSITE; PS00477; ALPHA\_2\_MACROGLOBULIN; 1.  
DR PROSITE; PS00430; TONB\_DEPENDENT\_REC\_1; 1.  
PE 2: Evidence at transcript level;  
KW Signal {ECO:0000256|SAM:SignalP}.  
FT SIGNAL 1..23  
FT /evidence="ECO:0000256|SAM:SignalP"  
FT CHAIN 24..1198  
FT /evidence="ECO:0000256|SAM:SignalP"  
FT /id="PRO\_5004488606"  
FT DOMAIN 459..607  
FT /note="A2M\_N\_2"  
FT /evidence="ECO:0000259|SMART:SM01359"  
FT DOMAIN 740..830  
FT /note="A2M"  
FT /evidence="ECO:0000259|SMART:SM01360"  
SQ SEQUENCE 1198 AA; 133386 MW; 9871AD7632A2EDBE CRC64;  
MGKNKLLYPS LTL L L L L L L L L L P TDASVSGKPQ YMLVPSLLH TETPEKGCLL LSHLNETVTV  
SASLESVREN RSLFTDVVAE KDLFHCVSFT LPRSPTSQEV MFLTIQVKGP TQEFKKRTTV  
LVKNEESLVF VQTDKPIYKP EQTVKFRIVL LDESFHPLNE LVPLVYVEDP KGNRIAQWQN  
LEVENGLQQL TFPLSSEPFQ GSYKVVVQKG SGGTAEHPFT VEEFVLPKFE VQVRMPKIIT  
ILEEEVQVSV CGLYTYGKPV PGRVTMNMCR KYRNP SNCYG EESNAVCEKF SGELNNEGCF  
SQQVNTKIFQ LKRQEFEMKI EVEAKIQEEG TEVELTGKGA TEITTTITKL SFVTVDNLRL  
RGIPFTGKVL LVDGKGVPMP NKVIFITANE ANHNSNTTDD EHGLAQFSIT TTKIKGTSLS  
IRVKYKDHS CYGYQWLSEE HQDAYHSANL VFSRSNSFVY LEPLPRELPC GKTQTVQAHY  
VLKGQVLKDL KELVFYYLIM AKGGIVRSGT HTLPVEQGDM QGHFSMSVPV ESDIAPVARL  
LIYAILPDGE VVGDSARYEI EHCLANKVGL NFSPGQSFPQ SQAHLRVTAS PQSLCALRAV  
DQSVLLMRPE AELSAATVYN LLPVKDLSSF PSSVNQQEED NEDCISHDNV YINGIMYFPV  
SNTNEKDMYS FLQDMGLKAF TNSKIHKPKI CPQPEEHRIQ HHTLLASVPR AEMGRNPDFV  
HFDDTSEPPT ETVRKYFPET WIWDLVVVSS SGVHEVEVTV PDTITEWKAG ALCLSRDTGL  
GLSPTASLRV FQPFVVELTM PYSVIRGEAF TLKATVLNLYL PKCIRVSVQL EASPAFLAVP  
EKEQETYCIC GNGRQTVSWA VTPKSLGNVN FTVSAEAVES QELCGSEVPV VPEHGRKDTI  
IKPLLVEPEG LEKEVIFNSL LCPSVDFVFL GAEDGGQVLR HFPPAAATDT ADAHDPARP

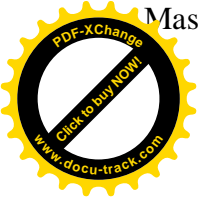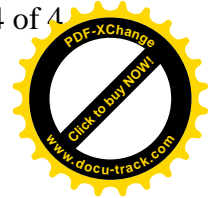

GAKVSESLSL KLPPNVVEES ARASFSVLGD ILGSAMRNTQ NLLQMPYGCG EQNMARFAPN  
IYVLDYLNET QQLTAEKSK AILYLNTGYQ RQLLYKHFDG SYSTFGEHRG NSEGNTWLTA  
FVLKSFAQAR GYIFIDEAHI TEALTWLAQK QKSNGCFRST GTLLNNAIKG GVDDEVTLTA  
YITIALLEMP LPVTHPVVRN ALFCLDSAWK CLKTMSMKTA LLDSLFRHLR SPWKKDNF

//

|                                                                                   |
|-----------------------------------------------------------------------------------|
| Mascot: <a href="http://www.matrixscience.com/">http://www.matrixscience.com/</a> |
|-----------------------------------------------------------------------------------|
