# Supplementary material for: Alpha-2-Macroglobulin as a New Promising Biomarker Improving the Diagnostic Sensitivity of Bovine Paratuberculosis
Source: Frontiers journal article supplement (doi:10.3389/fvets.2021.637716), 2021-03-05
Supplement: Data_Sheet_1.zip [file Data_Sheet_1.zip]

User :  
Email :  
Search title : BAEDW\2020\_3\_5\2020\_3\_5\MSMS 14\N24  
Database : Uniprot\_bovine\_bovine\_20200316 (134392 sequences; 76244912 residues)  
Timestamp : 31 Mar 2020 at 01:09:09 GMT  
Warning : A Peptide summary report will usually give a much clearer picture of MS/MS search results.  
Top Score : 131 for A0A3Q1MU98, Complement component C9 OS=Bos taurus OX=9913 GN=C9 PE=1 SV=1

Mascot Score Histogram

Protein score is -10\*Log(P), where P is the probability that the observed match is a random event.  
Protein scores greater than 64 are significant (p<0.05).  
Protein scores are derived from ions scores as a non-probabilistic basis for ranking protein hits.

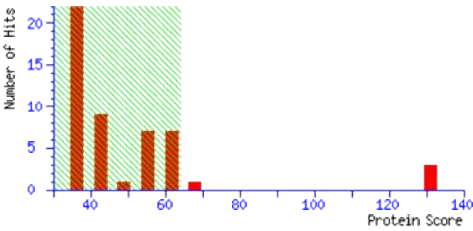

Protein Summary Report

Format As Protein Summary (deprecated) Help

Significance threshold p< 0.05 Max. number of hits 30

Preferred taxonomy All entries

Re-Search All Search Unmatched

Index

| Accession                      | Mass   | Score | Description                                                                                               |
|--------------------------------|--------|-------|-----------------------------------------------------------------------------------------------------------|
| 1. <a href="#">A0A3Q1MU98</a>  | 58618  | 131   | Complement component C9 OS=Bos taurus OX=9913 GN=C9 PE=1 SV=1                                             |
| 2. <a href="#">A0A4W2FBY7</a>  | 63327  | 128   | Complement C9 OS=Bos indicus x Bos taurus OX=30522 GN=C9 PE=4 SV=1                                        |
| 3. <a href="#">Q3MHN2</a>      | 63327  | 128   | Complement component C9 OS=Bos taurus OX=9913 GN=C9 PE=2 SV=1                                             |
| 4. <a href="#">Q2KJF1</a>      | 54091  | 68    | Alpha-1B-glycoprotein OS=Bos taurus OX=9913 GN=ALBG PE=1 SV=1                                             |
| 5. <a href="#">A0A4W2H1C4</a>  | 60879  | 64    | Alpha-1-B glycoprotein OS=Bos indicus x Bos taurus OX=30522 GN=ALBG PE=4 SV=1                             |
| 6. <a href="#">A0A3Q1MJT2</a>  | 62948  | 63    | Alpha-1B-glycoprotein OS=Bos taurus OX=9913 GN=ALBG PE=1 SV=1                                             |
| 7. <a href="#">A0A4W2EKQ3</a>  | 63006  | 63    | Alpha-1-B glycoprotein OS=Bos indicus x Bos taurus OX=30522 GN=ALBG PE=4 SV=1                             |
| 8. <a href="#">A0A4W2GYB4</a>  | 54132  | 61    | Alpha-1-B glycoprotein OS=Bos indicus x Bos taurus OX=30522 GN=ALBG PE=4 SV=1                             |
| 9. <a href="#">A0A4W2E7Y8</a>  | 54147  | 61    | Alpha-1-B glycoprotein OS=Bos indicus x Bos taurus OX=30522 GN=ALBG PE=4 SV=1                             |
| 10. <a href="#">A0A4W2IFR5</a> | 54987  | 60    | Alpha-1-B glycoprotein OS=Bos indicus x Bos taurus OX=30522 GN=ALBG PE=4 SV=1                             |
| 11. <a href="#">A0A4W2E8B7</a> | 55003  | 60    | Alpha-1-B glycoprotein OS=Bos indicus x Bos taurus OX=30522 GN=ALBG PE=4 SV=1                             |
| 12. <a href="#">A0A3Q1LNN7</a> | 68022  | 57    | Serum albumin OS=Bos taurus OX=9913 GN=ALB PE=4 SV=1                                                      |
| 13. <a href="#">A0A4W2DDL5</a> | 70207  | 56    | Albumin OS=Bos indicus x Bos taurus OX=30522 GN=ALB PE=4 SV=1                                             |
| 14. <a href="#">A0A4W2D8T3</a> | 76089  | 56    | Albumin OS=Bos indicus x Bos taurus OX=30522 GN=ALB PE=4 SV=1                                             |
| 15. <a href="#">A0A140T897</a> | 71274  | 56    | Serum albumin OS=Bos taurus OX=9913 GN=ALB PE=4 SV=1                                                      |
| 16. <a href="#">A0A4W2EVR9</a> | 71453  | 56    | Albumin OS=Bos indicus x Bos taurus OX=30522 GN=ALB PE=4 SV=1                                             |
| 17. <a href="#">A0A4W2EW60</a> | 76020  | 55    | Albumin OS=Bos indicus x Bos taurus OX=30522 GN=ALB PE=4 SV=1                                             |
| 18. <a href="#">P02769</a>     | 71244  | 55    | Serum albumin OS=Bos taurus OX=9913 GN=ALB PE=1 SV=4                                                      |
| 19. <a href="#">C1J945</a>     | 56189  | 48    | Nonstructural protein 5A (Fragment) OS=Bovine viral diarrhea virus OX=11099 PE=4 SV=1                     |
| 20. <a href="#">A0A4W2EGF3</a> | 97654  | 46    | Dynamin 3 OS=Bos indicus x Bos taurus OX=30522 GN=DNM3 PE=3 SV=1                                          |
| 21. <a href="#">A0A4W2MDN4</a> | 96034  | 45    | Uncharacterized protein OS=Bos taurus OX=9913 GN=DNM3 PE=3 SV=1                                           |
| 22. <a href="#">A0A4W2ET53</a> | 63308  | 44    | Dynamin 3 OS=Bos indicus x Bos taurus OX=30522 GN=DNM3 PE=3 SV=1                                          |
| 23. <a href="#">A0A4W2LJA6</a> | 101091 | 43    | Family with sequence similarity 111 member B OS=Bos indicus x Bos taurus OX=30522 GN=FAM111B PE=4 SV=1    |
| 24. <a href="#">A0A4W2BDJ6</a> | 52578  | 42    | 6-phosphofructo-2-kinase/fructose-2,6-bisphosphatase 1 OS=Bos indicus x Bos taurus OX=30522 GN=PFKFB1 PE= |
| 25. <a href="#">A0A3Q1LXK0</a> | 52578  | 42    | 6-phosphofructo-2-kinase/fructose-2,6-bisphosphatase 1 OS=Bos taurus OX=9913 GN=PFKFB1 PE=4 SV=1          |
| 26. <a href="#">A0A4W2EAD9</a> | 72734  | 40    | Dynamin 3 OS=Bos indicus x Bos taurus OX=30522 GN=DNM3 PE=3 SV=1                                          |
| 27. <a href="#">A0A4W2GWR3</a> | 70119  | 40    | Albumin OS=Bos indicus x Bos taurus OX=30522 GN=ALB PE=4 SV=1                                             |
| 28. <a href="#">B0JYQ0</a>     | 71244  | 40    | ALB protein OS=Bos taurus OX=9913 GN=ALB PE=2 SV=1                                                        |
| 29. <a href="#">A0A4W2D9L2</a> | 98304  | 39    | Dynamin 3 OS=Bos indicus x Bos taurus OX=30522 GN=DNM3 PE=3 SV=1                                          |
| 30. <a href="#">A0A4W2IKT9</a> | 75992  | 39    | Albumin OS=Bos indicus x Bos taurus OX=30522 GN=ALB PE=4 SV=1                                             |

Results List

|                                                                                                                                                                                                                                                                                                                                                                                                                                                                                                          |                            |             |            |                  |                                               |
|----------------------------------------------------------------------------------------------------------------------------------------------------------------------------------------------------------------------------------------------------------------------------------------------------------------------------------------------------------------------------------------------------------------------------------------------------------------------------------------------------------|----------------------------|-------------|------------|------------------|-----------------------------------------------|
| 1.                                                                                                                                                                                                                                                                                                                                                                                                                                                                                                       | <a href="#">A0A3Q1MU98</a> | Mass: 58618 | Score: 131 | Expect: 1.1e-008 | Matches: 12                                   |
| Complement component C9 OS=Bos taurus OX=9913 GN=C9 PE=1 SV=1                                                                                                                                                                                                                                                                                                                                                                                                                                            |                            |             |            |                  |                                               |
|                                                                                                                                                                                                                                                                                                                                                                                                                                                                                                          | Observed                   | Mr(expt)    | Mr(calcd)  | ppm              | Start End Miss Ions Peptide                   |
|                                                                                                                                                                                                                                                                                                                                                                                                                                                                                                          | 842.4471                   | 841.4398    | 841.4480   | -9.70            | 447 - 453 1 --- K.MKDAHLK.K                   |
|                                                                                                                                                                                                                                                                                                                                                                                                                                                                                                          | 868.4844                   | 867.4771    | 867.4702   | 8.03             | 287 - 294 0 --- R.LLSSYSAK.Q                  |
|                                                                                                                                                                                                                                                                                                                                                                                                                                                                                                          | 1156.5005                  | 1155.4932   | 1155.5706  | -67.00           | 33 - 42 0 --- R.QGTPLPIDCR.M                  |
|                                                                                                                                                                                                                                                                                                                                                                                                                                                                                                          | 1175.5602                  | 1174.5529   | 1174.6169  | -54.42           | 295 - 303 1 --- K.QEKMFHLVK.G + Oxidation (M) |
|                                                                                                                                                                                                                                                                                                                                                                                                                                                                                                          | 1267.5582                  | 1266.5509   | 1266.6357  | -66.92           | 64 - 74 0 --- R.SIEIFGQFNGR.K                 |
|                                                                                                                                                                                                                                                                                                                                                                                                                                                                                                          | 1267.5582                  | 1266.5510   | 1266.6357  | -66.89           | 64 - 74 0 29 R.SIEIFGQFNGR.K                  |
|                                                                                                                                                                                                                                                                                                                                                                                                                                                                                                          | 1387.5682                  | 1386.5609   | 1386.6568  | -69.15           | 182 - 192 0 --- R.VWDGNTLTYYR.R               |
|                                                                                                                                                                                                                                                                                                                                                                                                                                                                                                          | 1387.5682                  | 1386.5610   | 1386.6568  | -69.12           | 182 - 192 0 18 R.VWDGNTLTYYR.R                |
|                                                                                                                                                                                                                                                                                                                                                                                                                                                                                                          | 1455.6167                  | 1454.6094   | 1454.7041  | -65.10           | 460 - 471 0 --- R.AIEDYINEFSVR.K              |
|                                                                                                                                                                                                                                                                                                                                                                                                                                                                                                          | 1455.6167                  | 1454.6094   | 1454.7041  | -65.10           | 460 - 471 0 57 R.AIEDYINEFSVR.K               |
|                                                                                                                                                                                                                                                                                                                                                                                                                                                                                                          | 1550.6960                  | 1549.6887   | 1549.7889  | -64.62           | 193 - 205 0 --- R.RPWNVASLTYDTK.A             |
|                                                                                                                                                                                                                                                                                                                                                                                                                                                                                                          | 1550.6960                  | 1549.6888   | 1549.7889  | -64.60           | 193 - 205 0 --- R.RPWNVASLTYDTK.A             |
| No match to: 805.4406, 848.4654, 849.9925, 850.4734, 853.4557, 864.4832, 865.9639, 870.4808, 876.9719, 882.5003, 882.5003, 892.9417, 908.9123, 919.3989, 927.4218, 951.5530, 953.4604, 996.5237, 998.4718, 1017.5948, 1019.6071, 1033.6263, 1045.4912, 1051.6328, 1051.6328, 1065.5367, 1131.6298, 1133.6357, 1136.6206, 1139.4833, 1142.5555, 1142.5555, 1151.6481, 1165.6569, 1165.6569, 1184.6132, 1189.4962, 1247.6283, 1268.5472, 1287.5924, 1300.7646, 1305.5656, 1311.6147, 1334.7938, 1334.7938, |                            |             |            |                  |                                               |

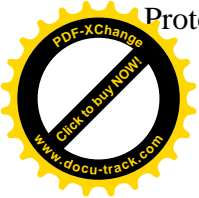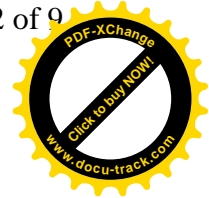

1396.6301, 1439.7159, 1448.8251, 1475.6594, 1479.6964, 1479.6964, 1498.6063, 1513.6995, 1513.6995, 1557.7151, 1567.6414, 1567.6414, 1617.9590, 1647.7349, 1724.7261, 1731.9867, 1901.1331, 2044.9095, 2210.9834, 2283.0552

2. [A0A4W2FBY7](#) Mass: 63327 Score: 128 Expect: 2.1e-008 Matches: 12

Complement C9 OS=Bos indicus x Bos taurus OX=30522 GN=C9 PE=4 SV=1

| Observed  | Mr(expt)  | Mr(calc)  | ppm    | Start | End | Miss | Ions | Peptide                           |
|-----------|-----------|-----------|--------|-------|-----|------|------|-----------------------------------|
| 842.4471  | 841.4398  | 841.4480  | -9.70  | 489   | -   | 495  | 1    | --- K.MKDAHLK.K                   |
| 868.4844  | 867.4771  | 867.4702  | 8.03   | 287   | -   | 294  | 0    | --- R.LLSSYSAK.Q                  |
| 1156.5005 | 1155.4932 | 1155.5706 | -67.00 | 33    | -   | 42   | 0    | --- R.QGTPLPIDCR.M                |
| 1175.5602 | 1174.5529 | 1174.6169 | -54.42 | 295   | -   | 303  | 1    | --- K.QEKMFLHVK.G + Oxidation (M) |
| 1267.5582 | 1266.5509 | 1266.6357 | -66.92 | 64    | -   | 74   | 0    | --- R.SIEIFGQFNGR.K               |
| 1267.5582 | 1266.5510 | 1266.6357 | -66.89 | 64    | -   | 74   | 0    | 29 R.SIEIFGQFNGR.K                |
| 1387.5682 | 1386.5609 | 1386.6568 | -69.15 | 182   | -   | 192  | 0    | --- R.VWDGNILTYR.R                |
| 1387.5682 | 1386.5610 | 1386.6568 | -69.12 | 182   | -   | 192  | 0    | 18 R.VWDGNILTYR.R                 |
| 1455.6167 | 1454.6094 | 1454.7041 | -65.10 | 502   | -   | 513  | 0    | --- R.AIEDYINEFSVR.K              |
| 1455.6167 | 1454.6094 | 1454.7041 | -65.10 | 502   | -   | 513  | 0    | 57 R.AIEDYINEFSVR.K               |
| 1550.6960 | 1549.6887 | 1549.7889 | -64.62 | 193   | -   | 205  | 0    | --- R.RPWNVASLTYDTK.A             |
| 1550.6960 | 1549.6888 | 1549.7889 | -64.60 | 193   | -   | 205  | 0    | --- R.RPWNVASLTYDTK.A             |

No match to: 805.4406, 848.4654, 849.9925, 850.4734, 853.4557, 864.4832, 865.9639, 870.4808, 876.9719, 882.5003, 882.5003, 892.9417, 908.9123, 919.3989, 927.4218, 951.5530, 953.4604, 996.5237, 998.4718, 1017.5948, 1019.6071, 1033.6263, 1045.4912, 1051.6328, 1051.6328, 1065.5367, 1131.6298, 1133.6357, 1136.6206, 1139.4833, 1142.5555, 1142.5555, 1151.6481, 1165.6569, 1165.6569, 1184.6132, 1189.4962, 1247.6283, 1268.5472, 1287.5924, 1300.7646, 1305.5656, 1311.6147, 1334.7938, 1334.7938, 1396.6301, 1439.7159, 1448.8251, 1475.6594, 1479.6964, 1479.6964, 1498.6063, 1513.6995, 1513.6995, 1557.7151, 1567.6414, 1567.6414, 1617.9590, 1647.7349, 1724.7261, 1731.9867, 1901.1331, 2044.9095, 2210.9834, 2283.0552

3. [Q3MHN2](#) Mass: 63327 Score: 128 Expect: 2.1e-008 Matches: 12

Complement component C9 OS=Bos taurus OX=9913 GN=C9 PE=2 SV=1

| Observed  | Mr(expt)  | Mr(calc)  | ppm    | Start | End | Miss | Ions | Peptide                           |
|-----------|-----------|-----------|--------|-------|-----|------|------|-----------------------------------|
| 842.4471  | 841.4398  | 841.4480  | -9.70  | 489   | -   | 495  | 1    | --- K.MKDAHLK.K                   |
| 868.4844  | 867.4771  | 867.4702  | 8.03   | 287   | -   | 294  | 0    | --- R.LLSSYSAK.Q                  |
| 1156.5005 | 1155.4932 | 1155.5706 | -67.00 | 33    | -   | 42   | 0    | --- R.QGTPLPIDCR.M                |
| 1175.5602 | 1174.5529 | 1174.6169 | -54.42 | 295   | -   | 303  | 1    | --- K.QEKMFLHVK.G + Oxidation (M) |
| 1267.5582 | 1266.5509 | 1266.6357 | -66.92 | 64    | -   | 74   | 0    | --- R.SIEIFGQFNGR.K               |
| 1267.5582 | 1266.5510 | 1266.6357 | -66.89 | 64    | -   | 74   | 0    | 29 R.SIEIFGQFNGR.K                |
| 1387.5682 | 1386.5609 | 1386.6568 | -69.15 | 182   | -   | 192  | 0    | --- R.VWDGNILTYR.R                |
| 1387.5682 | 1386.5610 | 1386.6568 | -69.12 | 182   | -   | 192  | 0    | 18 R.VWDGNILTYR.R                 |
| 1455.6167 | 1454.6094 | 1454.7041 | -65.10 | 502   | -   | 513  | 0    | --- R.AIEDYINEFSVR.K              |
| 1455.6167 | 1454.6094 | 1454.7041 | -65.10 | 502   | -   | 513  | 0    | 57 R.AIEDYINEFSVR.K               |
| 1550.6960 | 1549.6887 | 1549.7889 | -64.62 | 193   | -   | 205  | 0    | --- R.RPWNVASLTYDTK.A             |
| 1550.6960 | 1549.6888 | 1549.7889 | -64.60 | 193   | -   | 205  | 0    | --- R.RPWNVASLTYDTK.A             |

No match to: 805.4406, 848.4654, 849.9925, 850.4734, 853.4557, 864.4832, 865.9639, 870.4808, 876.9719, 882.5003, 882.5003, 892.9417, 908.9123, 919.3989, 927.4218, 951.5530, 953.4604, 996.5237, 998.4718, 1017.5948, 1019.6071, 1033.6263, 1045.4912, 1051.6328, 1051.6328, 1065.5367, 1131.6298, 1133.6357, 1136.6206, 1139.4833, 1142.5555, 1142.5555, 1151.6481, 1165.6569, 1165.6569, 1184.6132, 1189.4962, 1247.6283, 1268.5472, 1287.5924, 1300.7646, 1305.5656, 1311.6147, 1334.7938, 1334.7938, 1396.6301, 1439.7159, 1448.8251, 1475.6594, 1479.6964, 1479.6964, 1498.6063, 1513.6995, 1513.6995, 1557.7151, 1567.6414, 1567.6414, 1617.9590, 1647.7349, 1724.7261, 1731.9867, 1901.1331, 2044.9095, 2210.9834, 2283.0552

4. [Q2KJF1](#) Mass: 54091 Score: 68 Expect: 0.022 Matches: 11

Alpha-1B-glycoprotein OS=Bos taurus OX=9913 GN=ALBG PE=1 SV=1

| Observed  | Mr(expt)  | Mr(calc)  | ppm    | Start | End | Miss | Ions | Peptide                |
|-----------|-----------|-----------|--------|-------|-----|------|------|------------------------|
| 805.4406  | 804.4333  | 804.4858  | -65.20 | 148   | -   | 154  | 0    | --- R.GVTFLLR.L        |
| 919.3989  | 918.3916  | 918.4559  | -69.98 | 288   | -   | 295  | 0    | --- R.SELAASR.D        |
| 998.4718  | 997.4645  | 997.5192  | -54.85 | 249   | -   | 257  | 0    | --- R.GAEQLVPR.A       |
| 1142.5555 | 1141.5482 | 1141.6244 | -66.72 | 415   | -   | 425  | 0    | --- R.ALWTGALTPGR.D    |
| 1142.5555 | 1141.5483 | 1141.6244 | -66.68 | 415   | -   | 425  | 0    | --- R.ALWTGALTPGR.D    |
| 1175.5602 | 1174.5529 | 1174.6346 | -69.57 | 81    | -   | 91   | 0    | --- R.FPLGPVTSTTR.G    |
| 1247.6283 | 1246.6210 | 1246.7146 | -75.06 | 404   | -   | 414  | 0    | --- R.VDGPLPRPQLR.A    |
| 1498.6063 | 1497.5990 | 1497.6882 | -59.53 | 269   | -   | 283  | 0    | --- R.LSALAAGDGSYTCR.Y |
| 1513.6995 | 1512.6922 | 1512.7936 | -67.06 | 357   | -   | 370  | 0    | 27 R.VLSPAGPEAQFELR.G  |
| 1513.6995 | 1512.6922 | 1512.7936 | -67.03 | 357   | -   | 370  | 0    | --- R.VLSPAGPEAQFELR.G |
| 1647.7349 | 1646.7276 | 1646.8338 | -64.46 | 431   | -   | 444  | 0    | --- R.CEAEVDPVSFLLLR.A |

No match to: 842.4471, 848.4654, 849.9925, 850.4734, 853.4557, 864.4832, 865.9639, 868.4844, 870.4808, 876.9719, 882.5003, 882.5003, 892.9417, 908.9123, 927.4218, 951.5530, 953.4604, 996.5237, 1017.5948, 1019.6071, 1033.6263, 1045.4912, 1051.6328, 1051.6328, 1065.5367, 1131.6298, 1133.6357, 1136.6206, 1139.4833, 1151.6481, 1156.5005, 1165.6569, 1165.6569, 1184.6132, 1189.4962, 1267.5582, 1267.5582, 1268.5472, 1287.5924, 1300.7646, 1305.5656, 1311.6147, 1334.7938, 1334.7938, 1387.5682, 1387.5682, 1396.6301, 1439.7159, 1448.8251, 1455.6167, 1455.6167, 1475.6594, 1479.6964, 1479.6964, 1550.6960, 1550.6960, 1557.7151, 1567.6414, 1567.6414, 1617.9590, 1724.7261, 1731.9867, 1901.1331, 2044.9095, 2210.9834, 2283.0552

5. [A0A4W2H1C4](#) Mass: 60879 Score: 64 Expect: 0.05 Matches: 11

Alpha-1-B glycoprotein OS=Bos indicus x Bos taurus OX=30522 GN=ALBG PE=4 SV=1

| Observed  | Mr(expt)  | Mr(calc)  | ppm    | Start | End | Miss | Ions | Peptide                |
|-----------|-----------|-----------|--------|-------|-----|------|------|------------------------|
| 805.4406  | 804.4333  | 804.4858  | -65.20 | 148   | -   | 154  | 0    | --- R.GVTFLLR.L        |
| 919.3989  | 918.3916  | 918.4559  | -69.98 | 288   | -   | 295  | 0    | --- R.SELAASR.D        |
| 998.4718  | 997.4645  | 997.5192  | -54.85 | 249   | -   | 257  | 0    | --- R.GAEQLVPR.A       |
| 1142.5555 | 1141.5482 | 1141.6244 | -66.72 | 415   | -   | 425  | 0    | --- R.ALWTGALTPGR.D    |
| 1142.5555 | 1141.5483 | 1141.6244 | -66.68 | 415   | -   | 425  | 0    | --- R.ALWTGALTPGR.D    |
| 1175.5602 | 1174.5529 | 1174.6346 | -69.57 | 81    | -   | 91   | 0    | --- R.FPLGPVTSTTR.G    |
| 1247.6283 | 1246.6210 | 1246.7146 | -75.06 | 404   | -   | 414  | 0    | --- R.VDGPLPRPQLR.A    |
| 1498.6063 | 1497.5990 | 1497.6882 | -59.53 | 269   | -   | 283  | 0    | --- R.LSALAAGDGSYTCR.Y |
| 1513.6995 | 1512.6922 | 1512.7936 | -67.06 | 357   | -   | 370  | 0    | 27 R.VLSPAGPEAQFELR.G  |
| 1513.6995 | 1512.6922 | 1512.7936 | -67.03 | 357   | -   | 370  | 0    | --- R.VLSPAGPEAQFELR.G |
| 1647.7349 | 1646.7276 | 1646.8338 | -64.46 | 431   | -   | 444  | 0    | --- R.CEAEVDPVSFLLLR.A |

No match to: 842.4471, 848.4654, 849.9925, 850.4734, 853.4557, 864.4832, 865.9639, 868.4844, 870.4808, 876.9719, 882.5003, 882.5003, 892.9417, 908.9123, 927.4218, 951.5530, 953.4604, 996.5237, 1017.5948, 1019.6071, 1033.6263, 1045.4912, 1051.6328, 1051.6328, 1065.5367, 1131.6298, 1133.6357, 1136.6206, 1139.4833, 1151.6481, 1156.5005, 1165.6569, 1165.6569, 1184.6132, 1189.4962, 1267.5582, 1267.5582, 1268.5472, 1287.5924, 1300.7646, 1305.5656, 1311.6147, 1334.7938, 1334.7938, 1387.5682, 1387.5682, 1396.6301, 1439.7159, 1448.8251, 1455.6167, 1455.6167, 1475.6594, 1479.6964, 1479.6964, 1550.6960, 1550.6960, 1557.7151, 1567.6414, 1567.6414, 1617.9590, 1724.7261, 1731.9867, 1901.1331, 2044.9095, 2210.9834, 2283.0552

6. [A0A3Q1MJT2](#) Mass: 62948 Score: 63 Expect: 0.063 Matches: 11

Alpha-1B-glycoprotein OS=Bos taurus OX=9913 GN=ALBG PE=1 SV=1

| Observed | Mr(expt) | Mr(calc) | ppm    | Start | End | Miss | Ions | Peptide          |
|----------|----------|----------|--------|-------|-----|------|------|------------------|
| 805.4406 | 804.4333 | 804.4858 | -65.20 | 148   | -   | 154  | 0    | --- R.GVTFLLR.L  |
| 919.3989 | 918.3916 | 918.4559 | -69.98 | 288   | -   | 295  | 0    | --- R.SELAASR.D  |
| 998.4718 | 997.4645 | 997.5192 | -54.85 | 249   | -   | 257  | 0    | --- R.GAEQLVPR.A |

1142.5555 1141.5482 1141.6244 -66.72 415 - 425 0 --- R.ALWTGALTTPGR.D  
1142.5555 1141.5483 1141.6244 -66.68 415 - 425 0 --- R.ALWTGALTTPGR.D  
1175.5602 1174.5529 1174.6346 -69.57 81 - 91 0 --- R.FPLGPVTSTTR.G  
1247.6283 1246.6210 1246.7146 -75.06 404 - 414 0 --- R.VDGLPRPQLR.A  
1498.6063 1497.5990 1497.6882 -59.53 269 - 283 0 --- R.LSALAAGDGSYTCR.Y  
1513.6995 1512.6922 1512.7936 -67.06 357 - 370 0 27 R.VLSPAGPEAQFELR.G  
1513.6995 1512.6922 1512.7936 -67.03 357 - 370 0 --- R.VLSPAGPEAQFELR.G  
1647.7349 1646.7276 1646.8338 -64.46 431 - 444 0 --- R.CEAEPDVSFLLLR.A  
**No match to:** 842.4471, 848.4654, 849.9925, 850.4734, 853.4557, 864.4832, 865.9639, 868.4844, 870.4808, 876.9719, 882.5003, 882.5003, 892.9417, 908.9123, 927.4218, 951.5530, 953.4604, 996.5237, 1017.5948, 1019.6071, 1033.6263, 1045.4912, 1051.6328, 1051.6328, 1065.5367, 1131.6298, 1133.6357, 1136.6206, 1139.4833, 1151.6481, 1156.5005, 1165.6569, 1165.6569, 1184.6132, 1189.4962, 1267.5582, 1267.5582, 1268.5472, 1287.5924, 1300.7646, 1305.5656, 1311.6147, 1334.7938, 1334.7938, 1387.5682, 1387.5682, 1396.6301, 1439.7159, 1448.8251, 1455.6167, 1455.6167, 1475.6594, 1479.6964, 1479.6964, 1550.6960, 1550.6960, 1557.7151, 1567.6414, 1567.6414, 1617.9590, 1724.7261, 1731.9867, 1901.1331, 2044.9095, 2210.9834, 2283.0552

7. [A0A4W2EKQ3](#) Mass: 63006 Score: 63 Expect: 0.063 Matches: 11  
Alpha-1-B glycoprotein OS=Bos indicus x Bos taurus OX=30522 GN=ALBG PE=4 SV=1  

| Observed  | Mr(expt)  | Mr(calc)  | ppm    | Start | End   | Miss | Ions | Peptide            |
|-----------|-----------|-----------|--------|-------|-------|------|------|--------------------|
| 805.4406  | 804.4333  | 804.4858  | -65.20 | 148   | - 154 | 0    | ---  | R.GVTFLLR.L        |
| 919.3989  | 918.3916  | 918.4559  | -69.98 | 288   | - 295 | 0    | ---  | R.SELAASR.D        |
| 998.4718  | 997.4645  | 997.5192  | -54.85 | 249   | - 257 | 0    | ---  | R.GAEEQLVPR.A      |
| 1142.5555 | 1141.5482 | 1141.6244 | -66.72 | 415   | - 425 | 0    | ---  | R.ALWTGALTTPGR.D   |
| 1142.5555 | 1141.5483 | 1141.6244 | -66.68 | 415   | - 425 | 0    | ---  | R.ALWTGALTTPGR.D   |
| 1175.5602 | 1174.5529 | 1174.6346 | -69.57 | 81    | - 91  | 0    | ---  | R.FPLGPVTSTTR.G    |
| 1247.6283 | 1246.6210 | 1246.7146 | -75.06 | 404   | - 414 | 0    | ---  | R.VDGLPRPQLR.A     |
| 1498.6063 | 1497.5990 | 1497.6882 | -59.53 | 269   | - 283 | 0    | ---  | R.LSALAAGDGSYTCR.Y |
| 1513.6995 | 1512.6922 | 1512.7936 | -67.06 | 357   | - 370 | 0    | 27   | R.VLSPAGPEAQFELR.G |
| 1513.6995 | 1512.6922 | 1512.7936 | -67.03 | 357   | - 370 | 0    | ---  | R.VLSPAGPEAQFELR.G |
| 1647.7349 | 1646.7276 | 1646.8338 | -64.46 | 431   | - 444 | 0    | ---  | R.CEAEPDVSFLLLR.A  |

**No match to:** 842.4471, 848.4654, 849.9925, 850.4734, 853.4557, 864.4832, 865.9639, 868.4844, 870.4808, 876.9719, 882.5003, 882.5003, 892.9417, 908.9123, 927.4218, 951.5530, 953.4604, 996.5237, 1017.5948, 1019.6071, 1033.6263, 1045.4912, 1051.6328, 1051.6328, 1065.5367, 1131.6298, 1133.6357, 1136.6206, 1139.4833, 1151.6481, 1156.5005, 1165.6569, 1165.6569, 1184.6132, 1189.4962, 1267.5582, 1267.5582, 1268.5472, 1287.5924, 1300.7646, 1305.5656, 1311.6147, 1334.7938, 1334.7938, 1387.5682, 1387.5682, 1396.6301, 1439.7159, 1448.8251, 1455.6167, 1455.6167, 1475.6594, 1479.6964, 1479.6964, 1550.6960, 1550.6960, 1557.7151, 1567.6414, 1567.6414, 1617.9590, 1724.7261, 1731.9867, 1901.1331, 2044.9095, 2210.9834, 2283.0552

8. [A0A4W2GYB4](#) Mass: 54132 Score: 61 Expect: 0.11 Matches: 10  
Alpha-1-B glycoprotein OS=Bos indicus x Bos taurus OX=30522 GN=ALBG PE=4 SV=1  

| Observed  | Mr(expt)  | Mr(calc)  | ppm    | Start | End   | Miss | Ions | Peptide            |
|-----------|-----------|-----------|--------|-------|-------|------|------|--------------------|
| 805.4406  | 804.4333  | 804.4858  | -65.20 | 142   | - 148 | 0    | ---  | R.GVTFLLR.L        |
| 919.3989  | 918.3916  | 918.4559  | -69.98 | 282   | - 289 | 0    | ---  | R.SELAASR.D        |
| 998.4718  | 997.4645  | 997.5192  | -54.85 | 243   | - 251 | 0    | ---  | R.GAEEQLVPR.A      |
| 1142.5555 | 1141.5482 | 1141.6244 | -66.72 | 417   | - 427 | 0    | ---  | R.ALWTGALTTPGR.D   |
| 1142.5555 | 1141.5483 | 1141.6244 | -66.68 | 417   | - 427 | 0    | ---  | R.ALWTGALTTPGR.D   |
| 1175.5602 | 1174.5529 | 1174.6346 | -69.57 | 75    | - 85  | 0    | ---  | R.FPLGPVTSTTR.G    |
| 1498.6063 | 1497.5990 | 1497.6882 | -59.53 | 263   | - 277 | 0    | ---  | R.LSALAAGDGSYTCR.Y |
| 1513.6995 | 1512.6922 | 1512.7936 | -67.06 | 351   | - 364 | 0    | 27   | R.VLSPAGPEAQFELR.G |
| 1513.6995 | 1512.6922 | 1512.7936 | -67.03 | 351   | - 364 | 0    | ---  | R.VLSPAGPEAQFELR.G |
| 1647.7349 | 1646.7276 | 1646.8338 | -64.46 | 433   | - 446 | 0    | ---  | R.CEAEPDVSFLLLR.A  |

**No match to:** 842.4471, 848.4654, 849.9925, 850.4734, 853.4557, 864.4832, 865.9639, 868.4844, 870.4808, 876.9719, 882.5003, 882.5003, 892.9417, 908.9123, 927.4218, 951.5530, 953.4604, 996.5237, 1017.5948, 1019.6071, 1033.6263, 1045.4912, 1051.6328, 1051.6328, 1065.5367, 1131.6298, 1133.6357, 1136.6206, 1139.4833, 1151.6481, 1156.5005, 1165.6569, 1165.6569, 1184.6132, 1189.4962, 1247.6283, 1267.5582, 1267.5582, 1268.5472, 1287.5924, 1300.7646, 1305.5656, 1311.6147, 1334.7938, 1334.7938, 1387.5682, 1387.5682, 1396.6301, 1439.7159, 1448.8251, 1455.6167, 1455.6167, 1475.6594, 1479.6964, 1479.6964, 1550.6960, 1550.6960, 1557.7151, 1567.6414, 1567.6414, 1617.9590, 1724.7261, 1731.9867, 1901.1331, 2044.9095, 2210.9834, 2283.0552

9. [A0A4W2E798](#) Mass: 54147 Score: 61 Expect: 0.11 Matches: 10  
Alpha-1-B glycoprotein OS=Bos indicus x Bos taurus OX=30522 GN=ALBG PE=4 SV=1  

| Observed  | Mr(expt)  | Mr(calc)  | ppm    | Start | End   | Miss | Ions | Peptide            |
|-----------|-----------|-----------|--------|-------|-------|------|------|--------------------|
| 805.4406  | 804.4333  | 804.4858  | -65.20 | 142   | - 148 | 0    | ---  | R.GVTFLLR.L        |
| 919.3989  | 918.3916  | 918.4559  | -69.98 | 282   | - 289 | 0    | ---  | R.SELAASR.D        |
| 998.4718  | 997.4645  | 997.5192  | -54.85 | 243   | - 251 | 0    | ---  | R.GAEEQLVPR.A      |
| 1142.5555 | 1141.5482 | 1141.6244 | -66.72 | 417   | - 427 | 0    | ---  | R.ALWTGALTTPGR.D   |
| 1142.5555 | 1141.5483 | 1141.6244 | -66.68 | 417   | - 427 | 0    | ---  | R.ALWTGALTTPGR.D   |
| 1175.5602 | 1174.5529 | 1174.6346 | -69.57 | 75    | - 85  | 0    | ---  | R.FPLGPVTSTTR.G    |
| 1498.6063 | 1497.5990 | 1497.6882 | -59.53 | 263   | - 277 | 0    | ---  | R.LSALAAGDGSYTCR.Y |
| 1513.6995 | 1512.6922 | 1512.7936 | -67.06 | 351   | - 364 | 0    | 27   | R.VLSPAGPEAQFELR.G |
| 1513.6995 | 1512.6922 | 1512.7936 | -67.03 | 351   | - 364 | 0    | ---  | R.VLSPAGPEAQFELR.G |
| 1647.7349 | 1646.7276 | 1646.8338 | -64.46 | 433   | - 446 | 0    | ---  | R.CEAEPDVSFLLLR.A  |

**No match to:** 842.4471, 848.4654, 849.9925, 850.4734, 853.4557, 864.4832, 865.9639, 868.4844, 870.4808, 876.9719, 882.5003, 882.5003, 892.9417, 908.9123, 927.4218, 951.5530, 953.4604, 996.5237, 1017.5948, 1019.6071, 1033.6263, 1045.4912, 1051.6328, 1051.6328, 1065.5367, 1131.6298, 1133.6357, 1136.6206, 1139.4833, 1151.6481, 1156.5005, 1165.6569, 1165.6569, 1184.6132, 1189.4962, 1247.6283, 1267.5582, 1267.5582, 1268.5472, 1287.5924, 1300.7646, 1305.5656, 1311.6147, 1334.7938, 1334.7938, 1387.5682, 1387.5682, 1396.6301, 1439.7159, 1448.8251, 1455.6167, 1455.6167, 1475.6594, 1479.6964, 1479.6964, 1550.6960, 1550.6960, 1557.7151, 1567.6414, 1567.6414, 1617.9590, 1724.7261, 1731.9867, 1901.1331, 2044.9095, 2210.9834, 2283.0552

10. [A0A4W2IFR5](#) Mass: 54987 Score: 60 Expect: 0.12 Matches: 10  
Alpha-1-B glycoprotein OS=Bos indicus x Bos taurus OX=30522 GN=ALBG PE=4 SV=1  

| Observed  | Mr(expt)  | Mr(calc)  | ppm    | Start | End   | Miss | Ions | Peptide            |
|-----------|-----------|-----------|--------|-------|-------|------|------|--------------------|
| 805.4406  | 804.4333  | 804.4858  | -65.20 | 148   | - 154 | 0    | ---  | R.GVTFLLR.L        |
| 919.3989  | 918.3916  | 918.4559  | -69.98 | 288   | - 295 | 0    | ---  | R.SELAASR.D        |
| 998.4718  | 997.4645  | 997.5192  | -54.85 | 249   | - 257 | 0    | ---  | R.GAEEQLVPR.A      |
| 1142.5555 | 1141.5482 | 1141.6244 | -66.72 | 423   | - 433 | 0    | ---  | R.ALWTGALTTPGR.D   |
| 1142.5555 | 1141.5483 | 1141.6244 | -66.68 | 423   | - 433 | 0    | ---  | R.ALWTGALTTPGR.D   |
| 1175.5602 | 1174.5529 | 1174.6346 | -69.57 | 81    | - 91  | 0    | ---  | R.FPLGPVTSTTR.G    |
| 1498.6063 | 1497.5990 | 1497.6882 | -59.53 | 269   | - 283 | 0    | ---  | R.LSALAAGDGSYTCR.Y |
| 1513.6995 | 1512.6922 | 1512.7936 | -67.06 | 357   | - 370 | 0    | 27   | R.VLSPAGPEAQFELR.G |
| 1513.6995 | 1512.6922 | 1512.7936 | -67.03 | 357   | - 370 | 0    | ---  | R.VLSPAGPEAQFELR.G |
| 1647.7349 | 1646.7276 | 1646.8338 | -64.46 | 439   | - 452 | 0    | ---  | R.CEAEPDVSFLLLR.A  |

**No match to:** 842.4471, 848.4654, 849.9925, 850.4734, 853.4557, 864.4832, 865.9639, 868.4844, 870.4808, 876.9719, 882.5003, 882.5003, 892.9417, 908.9123, 927.4218, 951.5530, 953.4604, 996.5237, 1017.5948, 1019.6071, 1033.6263, 1045.4912, 1051.6328, 1051.6328, 1065.5367, 1131.6298, 1133.6357, 1136.6206, 1139.4833, 1151.6481, 1156.5005, 1165.6569, 1165.6569, 1184.6132, 1189.4962, 1247.6283, 1267.5582, 1267.5582, 1268.5472, 1287.5924, 1300.7646, 1305.5656, 1311.6147, 1334.7938, 1334.7938, 1387.5682, 1387.5682, 1396.6301, 1439.7159, 1448.8251, 1455.6167, 1455.6167, 1475.6594, 1479.6964, 1479.6964, 1550.6960, 1550.6960, 1557.7151, 1567.6414, 1567.6414, 1617.9590, 1724.7261, 1731.9867, 1901.1331, 2044.9095, 2210.9834, 2283.0552

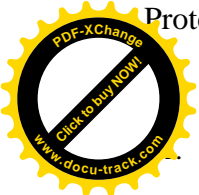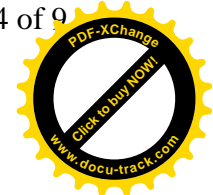

**A0A4W2E8B7** Mass: 55003 Score: 60 Expect: 0.12 Matches: 10

Alpha-1-B glycoprotein OS=Bos indicus x Bos taurus OX=30522 GN=ALBG PE=4 SV=1

| Observed                                                                                                                                                                                                                                                                                                                                                                                                                                                                                                                                                                                                                                                                                                                                               | Mr(expt)  | Mr(calc)  | ppm    | Start | End | Miss | Ions | Peptide             |
|--------------------------------------------------------------------------------------------------------------------------------------------------------------------------------------------------------------------------------------------------------------------------------------------------------------------------------------------------------------------------------------------------------------------------------------------------------------------------------------------------------------------------------------------------------------------------------------------------------------------------------------------------------------------------------------------------------------------------------------------------------|-----------|-----------|--------|-------|-----|------|------|---------------------|
| 805.4406                                                                                                                                                                                                                                                                                                                                                                                                                                                                                                                                                                                                                                                                                                                                               | 804.4333  | 804.4858  | -65.20 | 148   | 154 | 0    | ---  | R.GVTFLLR.L         |
| 919.3989                                                                                                                                                                                                                                                                                                                                                                                                                                                                                                                                                                                                                                                                                                                                               | 918.3916  | 918.4559  | -69.98 | 288   | 295 | 0    | ---  | R.SELAAWSR.D        |
| 998.4718                                                                                                                                                                                                                                                                                                                                                                                                                                                                                                                                                                                                                                                                                                                                               | 997.4645  | 997.5192  | -54.85 | 249   | 257 | 0    | ---  | R.GAEQLVPR.A        |
| 1142.5555                                                                                                                                                                                                                                                                                                                                                                                                                                                                                                                                                                                                                                                                                                                                              | 1141.5482 | 1141.6244 | -66.72 | 423   | 433 | 0    | ---  | R.ALWTGALTPGR.D     |
| 1142.5555                                                                                                                                                                                                                                                                                                                                                                                                                                                                                                                                                                                                                                                                                                                                              | 1141.5483 | 1141.6244 | -66.68 | 423   | 433 | 0    | ---  | R.ALWTGALTPGR.D     |
| 1175.5602                                                                                                                                                                                                                                                                                                                                                                                                                                                                                                                                                                                                                                                                                                                                              | 1174.5529 | 1174.6346 | -69.57 | 81    | 91  | 0    | ---  | R.FPLGPVSTTR.G      |
| 1498.6063                                                                                                                                                                                                                                                                                                                                                                                                                                                                                                                                                                                                                                                                                                                                              | 1497.5990 | 1497.6882 | -59.53 | 269   | 283 | 0    | ---  | R.LSALAAGDGSQYTCR.Y |
| 1513.6995                                                                                                                                                                                                                                                                                                                                                                                                                                                                                                                                                                                                                                                                                                                                              | 1512.6922 | 1512.7936 | -67.06 | 357   | 370 | 0    | 27   | R.VLSPAGPEAQFELR.G  |
| 1513.6995                                                                                                                                                                                                                                                                                                                                                                                                                                                                                                                                                                                                                                                                                                                                              | 1512.6922 | 1512.7936 | -67.03 | 357   | 370 | 0    | ---  | R.VLSPAGPEAQFELR.G  |
| 1647.7349                                                                                                                                                                                                                                                                                                                                                                                                                                                                                                                                                                                                                                                                                                                                              | 1646.7276 | 1646.8338 | -64.46 | 439   | 452 | 0    | ---  | R.CEAEVDPVSFLLLR.A  |
| <b>No match to:</b> 842.4471, 848.4654, 849.9925, 850.4734, 853.4557, 864.4832, 865.9639, 868.4844, 870.4808, 876.9719, 882.5003, 882.5003, 892.9417, 908.9123, 927.4218, 951.5530, 953.4604, 996.5237, 1017.5948, 1019.6071, 1033.6263, 1045.4912, 1051.6328, 1051.6328, 1065.5367, 1131.6298, 1133.6357, 1136.6206, 1139.4833, 1151.6481, 1156.5005, 1165.6569, 1165.6569, 1184.6132, 1189.4962, 1247.6283, 1267.5582, 1267.5582, 1268.5472, 1300.7646, 1305.5656, 1311.6147, 1334.7938, 1334.7938, 1387.5682, 1387.5682, 1396.6301, 1439.7159, 1448.8251, 1455.6167, 1455.6167, 1475.6594, 1479.6964, 1479.6964, 1550.6960, 1550.6960, 1557.7151, 1567.6414, 1567.6414, 1617.9590, 1724.7261, 1731.9867, 1901.1331, 2044.9095, 2210.9834, 2283.0552 |           |           |        |       |     |      |      |                     |

12. **A0A3Q1LNN7** Mass: 68022 Score: 57 Expect: 0.25 Matches: 9

Serum albumin OS=Bos taurus OX=9913 GN=ALB PE=4 SV=1

| Observed                                                                                                                                                                                                                                                                                                                                                                                                                                                                                                                                                                                                                                                                                                                                                         | Mr(expt)  | Mr(calc)  | ppm    | Start | End | Miss | Ions | Peptide              |
|------------------------------------------------------------------------------------------------------------------------------------------------------------------------------------------------------------------------------------------------------------------------------------------------------------------------------------------------------------------------------------------------------------------------------------------------------------------------------------------------------------------------------------------------------------------------------------------------------------------------------------------------------------------------------------------------------------------------------------------------------------------|-----------|-----------|--------|-------|-----|------|------|----------------------|
| 927.4218                                                                                                                                                                                                                                                                                                                                                                                                                                                                                                                                                                                                                                                                                                                                                         | 926.4145  | 926.4861  | -77.29 | 161   | 167 | 0    | ---  | K.YLYEIAR.R          |
| 1017.5948                                                                                                                                                                                                                                                                                                                                                                                                                                                                                                                                                                                                                                                                                                                                                        | 1016.5875 | 1016.5727 | 14.6   | 212   | 220 | 1    | ---  | K.VLTSSARQR.L        |
| 1439.7159                                                                                                                                                                                                                                                                                                                                                                                                                                                                                                                                                                                                                                                                                                                                                        | 1438.7086 | 1438.8045 | -66.61 | 360   | 371 | 1    | ---  | R.RHPEYAVSVLLR.L     |
| 1479.6964                                                                                                                                                                                                                                                                                                                                                                                                                                                                                                                                                                                                                                                                                                                                                        | 1478.6891 | 1478.7881 | -66.96 | 421   | 433 | 0    | ---  | K.LGEYGFQNALIVR.Y    |
| 1479.6964                                                                                                                                                                                                                                                                                                                                                                                                                                                                                                                                                                                                                                                                                                                                                        | 1478.6891 | 1478.7881 | -66.96 | 421   | 433 | 0    | 10   | K.LGEYGFQNALIVR.Y    |
| 1567.6414                                                                                                                                                                                                                                                                                                                                                                                                                                                                                                                                                                                                                                                                                                                                                        | 1566.6341 | 1566.7354 | -64.69 | 347   | 359 | 0    | 27   | K.DAFLGSLFLEYYSR.R   |
| 1567.6414                                                                                                                                                                                                                                                                                                                                                                                                                                                                                                                                                                                                                                                                                                                                                        | 1566.6341 | 1566.7354 | -64.67 | 347   | 359 | 0    | ---  | K.DAFLGSLFLEYYSR.R   |
| 1724.7261                                                                                                                                                                                                                                                                                                                                                                                                                                                                                                                                                                                                                                                                                                                                                        | 1723.7188 | 1723.8273 | -62.93 | 469   | 482 | 0    | ---  | R.MPCTEDYLSLILNR.L   |
| 2044.9095                                                                                                                                                                                                                                                                                                                                                                                                                                                                                                                                                                                                                                                                                                                                                        | 2043.9022 | 2044.0206 | -57.93 | 168   | 183 | 1    | ---  | R.RHPYFYAPELLEYANK.Y |
| <b>No match to:</b> 805.4406, 842.4471, 848.4654, 849.9925, 850.4734, 853.4557, 864.4832, 865.9639, 868.4844, 870.4808, 876.9719, 882.5003, 892.9417, 908.9123, 919.3989, 951.5530, 953.4604, 996.5237, 998.4718, 1019.6071, 1033.6263, 1045.4912, 1051.6328, 1051.6328, 1065.5367, 1131.6298, 1133.6357, 1136.6206, 1139.4833, 1142.5555, 1142.5555, 1151.6481, 1156.5005, 1165.6569, 1165.6569, 1175.5602, 1184.6132, 1189.4962, 1247.6283, 1267.5582, 1267.5582, 1268.5472, 1287.5924, 1300.7646, 1305.5656, 1311.6147, 1334.7938, 1334.7938, 1387.5682, 1387.5682, 1396.6301, 1448.8251, 1455.6167, 1455.6167, 1475.6594, 1498.6063, 1513.6995, 1513.6995, 1550.6960, 1550.6960, 1557.7151, 1617.9590, 1647.7349, 1731.9867, 1901.1331, 2210.9834, 2283.0552 |           |           |        |       |     |      |      |                      |

13. **A0A4W2DDL5** Mass: 70207 Score: 56 Expect: 0.31 Matches: 9

Albumin OS=Bos indicus x Bos taurus OX=30522 GN=ALB PE=4 SV=1

| Observed                                                                                                                                                                                                                                                                                                                                                                                                                                                                                                                                                                                                                                                                                                                                                                   | Mr(expt)  | Mr(calc)  | ppm    | Start | End | Miss | Ions | Peptide              |
|----------------------------------------------------------------------------------------------------------------------------------------------------------------------------------------------------------------------------------------------------------------------------------------------------------------------------------------------------------------------------------------------------------------------------------------------------------------------------------------------------------------------------------------------------------------------------------------------------------------------------------------------------------------------------------------------------------------------------------------------------------------------------|-----------|-----------|--------|-------|-----|------|------|----------------------|
| 927.4218                                                                                                                                                                                                                                                                                                                                                                                                                                                                                                                                                                                                                                                                                                                                                                   | 926.4145  | 926.4861  | -77.29 | 152   | 158 | 0    | ---  | K.YLYEIAR.R          |
| 1017.5948                                                                                                                                                                                                                                                                                                                                                                                                                                                                                                                                                                                                                                                                                                                                                                  | 1016.5875 | 1016.5727 | 14.6   | 203   | 211 | 1    | ---  | K.VLTSSARQR.L        |
| 1439.7159                                                                                                                                                                                                                                                                                                                                                                                                                                                                                                                                                                                                                                                                                                                                                                  | 1438.7086 | 1438.8045 | -66.61 | 351   | 362 | 1    | ---  | R.RHPEYAVSVLLR.L     |
| 1479.6964                                                                                                                                                                                                                                                                                                                                                                                                                                                                                                                                                                                                                                                                                                                                                                  | 1478.6891 | 1478.7881 | -66.96 | 412   | 424 | 0    | ---  | K.LGEYGFQNALIVR.Y    |
| 1479.6964                                                                                                                                                                                                                                                                                                                                                                                                                                                                                                                                                                                                                                                                                                                                                                  | 1478.6891 | 1478.7881 | -66.96 | 412   | 424 | 0    | 10   | K.LGEYGFQNALIVR.Y    |
| 1567.6414                                                                                                                                                                                                                                                                                                                                                                                                                                                                                                                                                                                                                                                                                                                                                                  | 1566.6341 | 1566.7354 | -64.69 | 338   | 350 | 0    | 27   | K.DAFLGSLFLEYYSR.R   |
| 1567.6414                                                                                                                                                                                                                                                                                                                                                                                                                                                                                                                                                                                                                                                                                                                                                                  | 1566.6341 | 1566.7354 | -64.67 | 338   | 350 | 0    | ---  | K.DAFLGSLFLEYYSR.R   |
| 1724.7261                                                                                                                                                                                                                                                                                                                                                                                                                                                                                                                                                                                                                                                                                                                                                                  | 1723.7188 | 1723.8273 | -62.93 | 460   | 473 | 0    | ---  | R.MPCTEDYLSLILNR.L   |
| 2044.9095                                                                                                                                                                                                                                                                                                                                                                                                                                                                                                                                                                                                                                                                                                                                                                  | 2043.9022 | 2044.0206 | -57.93 | 159   | 174 | 1    | ---  | R.RHPYFYAPELLEYANK.Y |
| <b>No match to:</b> 805.4406, 842.4471, 848.4654, 849.9925, 850.4734, 853.4557, 864.4832, 865.9639, 868.4844, 870.4808, 876.9719, 882.5003, 882.5003, 892.9417, 908.9123, 919.3989, 951.5530, 953.4604, 996.5237, 998.4718, 1019.6071, 1033.6263, 1045.4912, 1051.6328, 1051.6328, 1065.5367, 1131.6298, 1133.6357, 1136.6206, 1139.4833, 1142.5555, 1142.5555, 1151.6481, 1156.5005, 1165.6569, 1165.6569, 1175.5602, 1184.6132, 1189.4962, 1247.6283, 1267.5582, 1267.5582, 1268.5472, 1287.5924, 1300.7646, 1305.5656, 1311.6147, 1334.7938, 1334.7938, 1387.5682, 1387.5682, 1396.6301, 1448.8251, 1455.6167, 1455.6167, 1475.6594, 1498.6063, 1513.6995, 1513.6995, 1550.6960, 1550.6960, 1557.7151, 1617.9590, 1647.7349, 1731.9867, 1901.1331, 2210.9834, 2283.0552 |           |           |        |       |     |      |      |                      |

14. **A0A4W2D8T3** Mass: 76089 Score: 56 Expect: 0.33 Matches: 9

Albumin OS=Bos indicus x Bos taurus OX=30522 GN=ALB PE=4 SV=1

| Observed                                                                                                                                                                                                                                                                                                                                                                                                                                                                                                                                                                                                                                                                                                                                                                   | Mr(expt)  | Mr(calc)  | ppm    | Start | End | Miss | Ions | Peptide              |
|----------------------------------------------------------------------------------------------------------------------------------------------------------------------------------------------------------------------------------------------------------------------------------------------------------------------------------------------------------------------------------------------------------------------------------------------------------------------------------------------------------------------------------------------------------------------------------------------------------------------------------------------------------------------------------------------------------------------------------------------------------------------------|-----------|-----------|--------|-------|-----|------|------|----------------------|
| 927.4218                                                                                                                                                                                                                                                                                                                                                                                                                                                                                                                                                                                                                                                                                                                                                                   | 926.4145  | 926.4861  | -77.29 | 209   | 215 | 0    | ---  | K.YLYEIAR.R          |
| 1017.5948                                                                                                                                                                                                                                                                                                                                                                                                                                                                                                                                                                                                                                                                                                                                                                  | 1016.5875 | 1016.5727 | 14.6   | 260   | 268 | 1    | ---  | K.VLTSSARQR.L        |
| 1439.7159                                                                                                                                                                                                                                                                                                                                                                                                                                                                                                                                                                                                                                                                                                                                                                  | 1438.7086 | 1438.8045 | -66.61 | 408   | 419 | 1    | ---  | R.RHPEYAVSVLLR.L     |
| 1479.6964                                                                                                                                                                                                                                                                                                                                                                                                                                                                                                                                                                                                                                                                                                                                                                  | 1478.6891 | 1478.7881 | -66.96 | 469   | 481 | 0    | ---  | K.LGEYGFQNALIVR.Y    |
| 1479.6964                                                                                                                                                                                                                                                                                                                                                                                                                                                                                                                                                                                                                                                                                                                                                                  | 1478.6891 | 1478.7881 | -66.96 | 469   | 481 | 0    | 10   | K.LGEYGFQNALIVR.Y    |
| 1567.6414                                                                                                                                                                                                                                                                                                                                                                                                                                                                                                                                                                                                                                                                                                                                                                  | 1566.6341 | 1566.7354 | -64.69 | 395   | 407 | 0    | 27   | K.DAFLGSLFLEYYSR.R   |
| 1567.6414                                                                                                                                                                                                                                                                                                                                                                                                                                                                                                                                                                                                                                                                                                                                                                  | 1566.6341 | 1566.7354 | -64.67 | 395   | 407 | 0    | ---  | K.DAFLGSLFLEYYSR.R   |
| 1724.7261                                                                                                                                                                                                                                                                                                                                                                                                                                                                                                                                                                                                                                                                                                                                                                  | 1723.7188 | 1723.8273 | -62.93 | 517   | 530 | 0    | ---  | R.MPCTEDYLSLILNR.L   |
| 2044.9095                                                                                                                                                                                                                                                                                                                                                                                                                                                                                                                                                                                                                                                                                                                                                                  | 2043.9022 | 2044.0206 | -57.93 | 216   | 231 | 1    | ---  | R.RHPYFYAPELLEYANK.Y |
| <b>No match to:</b> 805.4406, 842.4471, 848.4654, 849.9925, 850.4734, 853.4557, 864.4832, 865.9639, 868.4844, 870.4808, 876.9719, 882.5003, 882.5003, 892.9417, 908.9123, 919.3989, 951.5530, 953.4604, 996.5237, 998.4718, 1019.6071, 1033.6263, 1045.4912, 1051.6328, 1051.6328, 1065.5367, 1131.6298, 1133.6357, 1136.6206, 1139.4833, 1142.5555, 1142.5555, 1151.6481, 1156.5005, 1165.6569, 1165.6569, 1175.5602, 1184.6132, 1189.4962, 1247.6283, 1267.5582, 1267.5582, 1268.5472, 1287.5924, 1300.7646, 1305.5656, 1311.6147, 1334.7938, 1334.7938, 1387.5682, 1387.5682, 1396.6301, 1448.8251, 1455.6167, 1455.6167, 1475.6594, 1498.6063, 1513.6995, 1513.6995, 1550.6960, 1550.6960, 1557.7151, 1617.9590, 1647.7349, 1731.9867, 1901.1331, 2210.9834, 2283.0552 |           |           |        |       |     |      |      |                      |

15. **A0A140T897** Mass: 71274 Score: 56 Expect: 0.37 Matches: 9

Serum albumin OS=Bos taurus OX=9913 GN=ALB PE=4 SV=1

| Observed                                                                                                                                                                                                                                                                                                                                                                                                                                                                                                                                                                                                                                                                                                                                                                   | Mr(expt)  | Mr(calc)  | ppm    | Start | End | Miss | Ions | Peptide              |
|----------------------------------------------------------------------------------------------------------------------------------------------------------------------------------------------------------------------------------------------------------------------------------------------------------------------------------------------------------------------------------------------------------------------------------------------------------------------------------------------------------------------------------------------------------------------------------------------------------------------------------------------------------------------------------------------------------------------------------------------------------------------------|-----------|-----------|--------|-------|-----|------|------|----------------------|
| 927.4218                                                                                                                                                                                                                                                                                                                                                                                                                                                                                                                                                                                                                                                                                                                                                                   | 926.4145  | 926.4861  | -77.29 | 161   | 167 | 0    | ---  | K.YLYEIAR.R          |
| 1017.5948                                                                                                                                                                                                                                                                                                                                                                                                                                                                                                                                                                                                                                                                                                                                                                  | 1016.5875 | 1016.5727 | 14.6   | 212   | 220 | 1    | ---  | K.VLTSSARQR.L        |
| 1439.7159                                                                                                                                                                                                                                                                                                                                                                                                                                                                                                                                                                                                                                                                                                                                                                  | 1438.7086 | 1438.8045 | -66.61 | 360   | 371 | 1    | ---  | R.RHPEYAVSVLLR.L     |
| 1479.6964                                                                                                                                                                                                                                                                                                                                                                                                                                                                                                                                                                                                                                                                                                                                                                  | 1478.6891 | 1478.7881 | -66.96 | 421   | 433 | 0    | ---  | K.LGEYGFQNALIVR.Y    |
| 1479.6964                                                                                                                                                                                                                                                                                                                                                                                                                                                                                                                                                                                                                                                                                                                                                                  | 1478.6891 | 1478.7881 | -66.96 | 421   | 433 | 0    | 10   | K.LGEYGFQNALIVR.Y    |
| 1567.6414                                                                                                                                                                                                                                                                                                                                                                                                                                                                                                                                                                                                                                                                                                                                                                  | 1566.6341 | 1566.7354 | -64.69 | 347   | 359 | 0    | 27   | K.DAFLGSLFLEYYSR.R   |
| 1567.6414                                                                                                                                                                                                                                                                                                                                                                                                                                                                                                                                                                                                                                                                                                                                                                  | 1566.6341 | 1566.7354 | -64.67 | 347   | 359 | 0    | ---  | K.DAFLGSLFLEYYSR.R   |
| 1724.7261                                                                                                                                                                                                                                                                                                                                                                                                                                                                                                                                                                                                                                                                                                                                                                  | 1723.7188 | 1723.8273 | -62.93 | 469   | 482 | 0    | ---  | R.MPCTEDYLSLILNR.L   |
| 2044.9095                                                                                                                                                                                                                                                                                                                                                                                                                                                                                                                                                                                                                                                                                                                                                                  | 2043.9022 | 2044.0206 | -57.93 | 168   | 183 | 1    | ---  | R.RHPYFYAPELLEYANK.Y |
| <b>No match to:</b> 805.4406, 842.4471, 848.4654, 849.9925, 850.4734, 853.4557, 864.4832, 865.9639, 868.4844, 870.4808, 876.9719, 882.5003, 882.5003, 892.9417, 908.9123, 919.3989, 951.5530, 953.4604, 996.5237, 998.4718, 1019.6071, 1033.6263, 1045.4912, 1051.6328, 1051.6328, 1065.5367, 1131.6298, 1133.6357, 1136.6206, 1139.4833, 1142.5555, 1142.5555, 1151.6481, 1156.5005, 1165.6569, 1165.6569, 1175.5602, 1184.6132, 1189.4962, 1247.6283, 1267.5582, 1267.5582, 1268.5472, 1287.5924, 1300.7646, 1305.5656, 1311.6147, 1334.7938, 1334.7938, 1387.5682, 1387.5682, 1396.6301, 1448.8251, 1455.6167, 1455.6167, 1475.6594, 1498.6063, 1513.6995, 1513.6995, 1550.6960, 1550.6960, 1557.7151, 1617.9590, 1647.7349, 1731.9867, 1901.1331, 2210.9834, 2283.0552 |           |           |        |       |     |      |      |                      |

1305.5656, 1311.6147, 1334.7938, 1334.7938, 1387.5682, 1387.5682, 1396.6301, 1448.8251, 1455.6167, 1455.6167, 1475.6594, 1498.6063, 1513.6995, 1513.6995, 1550.6960, 1550.6960, 1557.7151, 1617.9590, 1647.7349, 1731.9867, 1901.1331, 2210.9834, 2283.0552

16. A0A4W2EVR9      Mass: 71453      Score: 56      Expect: 0.37      Matches: 9

Albumin OS=Bos indicus x Bos taurus OX=30522 GN=ALB PE=4 SV=1

| Observed  | Mr(expt)  | Mr(calc)  | ppm    | Start | End | Miss | Ions | Peptide              |
|-----------|-----------|-----------|--------|-------|-----|------|------|----------------------|
| 927.4218  | 926.4145  | 926.4861  | -77.29 | 161   | 167 | 0    | ---  | K.YLYEIAR.R          |
| 1017.5948 | 1016.5875 | 1016.5727 | 14.6   | 212   | 220 | 1    | ---  | K.VLTSSARQR.L        |
| 1439.7159 | 1438.7086 | 1438.8045 | -66.61 | 360   | 371 | 1    | ---  | R.RHPEYAVSVLLR.L     |
| 1479.6964 | 1478.6891 | 1478.7881 | -66.96 | 421   | 433 | 0    | ---  | K.LGEYGFQNALIVR.Y    |
| 1479.6964 | 1478.6891 | 1478.7881 | -66.96 | 421   | 433 | 0    | 10   | K.LGEYGFQNALIVR.Y    |
| 1567.6414 | 1566.6341 | 1566.7354 | -64.69 | 347   | 359 | 0    | 27   | K.DAFLGSFLYEYSR.R    |
| 1567.6414 | 1566.6341 | 1566.7354 | -64.67 | 347   | 359 | 0    | ---  | K.DAFLGSFLYEYSR.R    |
| 1724.7261 | 1723.7188 | 1723.8273 | -62.93 | 469   | 482 | 0    | ---  | R.MPCTEDYLSLILNLR.L  |
| 2044.9095 | 2043.9022 | 2044.0206 | -57.93 | 168   | 183 | 1    | ---  | R.RHPYFYAPELLEYANK.Y |

No match to: 805.4406, 842.4471, 848.4654, 849.9925, 850.4734, 853.4557, 864.4832, 865.9639, 868.4844, 870.4808, 876.9719, 882.5003, 882.5003, 892.9417, 908.9123, 919.3989, 951.5530, 953.4604, 996.5237, 998.4718, 1019.6071, 1033.6263, 1045.4912, 1051.6328, 1051.6328, 1065.5367, 1131.6298, 1133.6357, 1136.6206, 1139.4833, 1142.5555, 1142.5555, 1151.6481, 1156.5005, 1165.6569, 1165.6569, 1175.5602, 1184.6132, 1189.4962, 1247.6283, 1267.5582, 1267.5582, 1268.5472, 1287.5924, 1300.7646, 1305.5656, 1311.6147, 1334.7938, 1334.7938, 1387.5682, 1387.5682, 1396.6301, 1448.8251, 1455.6167, 1455.6167, 1475.6594, 1498.6063, 1513.6995, 1513.6995, 1550.6960, 1550.6960, 1557.7151, 1617.9590, 1647.7349, 1731.9867, 1901.1331, 2210.9834, 2283.0552

17. A0A4W2EW60      Mass: 76020      Score: 55      Expect: 0.43      Matches: 9

Albumin OS=Bos indicus x Bos taurus OX=30522 GN=ALB PE=4 SV=1

| Observed  | Mr(expt)  | Mr(calc)  | ppm    | Start | End | Miss | Ions | Peptide              |
|-----------|-----------|-----------|--------|-------|-----|------|------|----------------------|
| 927.4218  | 926.4145  | 926.4861  | -77.29 | 161   | 167 | 0    | ---  | K.YLYEIAR.R          |
| 1017.5948 | 1016.5875 | 1016.5727 | 14.6   | 212   | 220 | 1    | ---  | K.VLTSSARQR.L        |
| 1439.7159 | 1438.7086 | 1438.8045 | -66.61 | 360   | 371 | 1    | ---  | R.RHPEYAVSVLLR.L     |
| 1479.6964 | 1478.6891 | 1478.7881 | -66.96 | 421   | 433 | 0    | ---  | K.LGEYGFQNALIVR.Y    |
| 1479.6964 | 1478.6891 | 1478.7881 | -66.96 | 421   | 433 | 0    | 10   | K.LGEYGFQNALIVR.Y    |
| 1567.6414 | 1566.6341 | 1566.7354 | -64.69 | 347   | 359 | 0    | 27   | K.DAFLGSFLYEYSR.R    |
| 1567.6414 | 1566.6341 | 1566.7354 | -64.67 | 347   | 359 | 0    | ---  | K.DAFLGSFLYEYSR.R    |
| 1724.7261 | 1723.7188 | 1723.8273 | -62.93 | 469   | 482 | 0    | ---  | R.MPCTEDYLSLILNLR.L  |
| 2044.9095 | 2043.9022 | 2044.0206 | -57.93 | 168   | 183 | 1    | ---  | R.RHPYFYAPELLEYANK.Y |

No match to: 805.4406, 842.4471, 848.4654, 849.9925, 850.4734, 853.4557, 864.4832, 865.9639, 868.4844, 870.4808, 876.9719, 882.5003, 882.5003, 892.9417, 908.9123, 919.3989, 951.5530, 953.4604, 996.5237, 998.4718, 1019.6071, 1033.6263, 1045.4912, 1051.6328, 1051.6328, 1065.5367, 1131.6298, 1133.6357, 1136.6206, 1139.4833, 1142.5555, 1142.5555, 1151.6481, 1156.5005, 1165.6569, 1165.6569, 1175.5602, 1184.6132, 1189.4962, 1247.6283, 1267.5582, 1267.5582, 1268.5472, 1287.5924, 1300.7646, 1305.5656, 1311.6147, 1334.7938, 1334.7938, 1387.5682, 1387.5682, 1396.6301, 1448.8251, 1455.6167, 1455.6167, 1475.6594, 1498.6063, 1513.6995, 1513.6995, 1550.6960, 1550.6960, 1557.7151, 1617.9590, 1647.7349, 1731.9867, 1901.1331, 2210.9834, 2283.0552

18. P02769      Mass: 71244      Score: 55      Expect: 0.46      Matches: 8

Serum albumin OS=Bos taurus OX=9913 GN=ALB PE=1 SV=4

| Observed  | Mr(expt)  | Mr(calc)  | ppm    | Start | End | Miss | Ions | Peptide              |
|-----------|-----------|-----------|--------|-------|-----|------|------|----------------------|
| 927.4218  | 926.4145  | 926.4861  | -77.29 | 161   | 167 | 0    | ---  | K.YLYEIAR.R          |
| 1439.7159 | 1438.7086 | 1438.8045 | -66.61 | 360   | 371 | 1    | ---  | R.RHPEYAVSVLLR.L     |
| 1479.6964 | 1478.6891 | 1478.7881 | -66.96 | 421   | 433 | 0    | ---  | K.LGEYGFQNALIVR.Y    |
| 1479.6964 | 1478.6891 | 1478.7881 | -66.96 | 421   | 433 | 0    | 10   | K.LGEYGFQNALIVR.Y    |
| 1567.6414 | 1566.6341 | 1566.7354 | -64.69 | 347   | 359 | 0    | 27   | K.DAFLGSFLYEYSR.R    |
| 1567.6414 | 1566.6341 | 1566.7354 | -64.67 | 347   | 359 | 0    | ---  | K.DAFLGSFLYEYSR.R    |
| 1724.7261 | 1723.7188 | 1723.8273 | -62.93 | 469   | 482 | 0    | ---  | R.MPCTEDYLSLILNLR.L  |
| 2044.9095 | 2043.9022 | 2044.0206 | -57.93 | 168   | 183 | 1    | ---  | R.RHPYFYAPELLEYANK.Y |

No match to: 805.4406, 842.4471, 848.4654, 849.9925, 850.4734, 853.4557, 864.4832, 865.9639, 868.4844, 870.4808, 876.9719, 882.5003, 882.5003, 892.9417, 908.9123, 919.3989, 951.5530, 953.4604, 996.5237, 998.4718, 1017.5948, 1019.6071, 1033.6263, 1045.4912, 1045.4912, 1051.6328, 1051.6328, 1065.5367, 1131.6298, 1133.6357, 1136.6206, 1139.4833, 1142.5555, 1142.5555, 1151.6481, 1156.5005, 1165.6569, 1165.6569, 1175.5602, 1184.6132, 1189.4962, 1247.6283, 1267.5582, 1267.5582, 1268.5472, 1287.5924, 1300.7646, 1300.7646, 1305.5656, 1311.6147, 1334.7938, 1334.7938, 1387.5682, 1387.5682, 1396.6301, 1448.8251, 1455.6167, 1455.6167, 1475.6594, 1475.6594, 1498.6063, 1513.6995, 1513.6995, 1550.6960, 1550.6960, 1557.7151, 1617.9590, 1647.7349, 1731.9867, 1901.1331, 2210.9834, 2283.0552

19. C1J945      Mass: 56189      Score: 48      Expect: 2.1      Matches: 12

Nonstructural protein 5A (Fragment) OS=Bovine viral diarrhea virus OX=11099 PE=4 SV=1

| Observed  | Mr(expt)  | Mr(calc)  | ppm    | Start | End | Miss | Ions | Peptide                           |
|-----------|-----------|-----------|--------|-------|-----|------|------|-----------------------------------|
| 805.4406  | 804.4333  | 804.4341  | -1.00  | 68    | 75  | 0    | ---  | R.NVSGSLTK.V                      |
| 927.4218  | 926.4145  | 926.4974  | -89.46 | 156   | 163 | 1    | ---  | K.RYTGVPFK.G                      |
| 1033.6263 | 1032.6190 | 1032.5716 | 45.9   | 91    | 99  | 1    | ---  | R.GPVNRYRVTK.Y                    |
| 1133.6357 | 1132.6284 | 1132.6427 | -12.59 | 338   | 347 | 0    | ---  | R.RPFVMVLGSK.T                    |
| 1189.4962 | 1188.4889 | 1188.5921 | -86.78 | 370   | 379 | 1    | ---  | R.EIRDLMAEGR.M                    |
| 1287.5924 | 1286.5851 | 1286.6507 | -50.94 | 459   | 469 | 0    | ---  | K.YHLVGDVVEVK.R                   |
| 1557.7151 | 1556.7078 | 1556.7769 | -44.40 | 143   | 155 | 1    | ---  | K.WEVEHGVVTRMAK.R + Oxidation (M) |
| 1567.6414 | 1566.6341 | 1566.7453 | -71.01 | 387   | 399 | 0    | ---  | R.EFDPPELSELVDFK.G                |
| 1567.6414 | 1566.6341 | 1566.7453 | -70.99 | 387   | 399 | 0    | ---  | R.EFDPPELSELVDFK.G                |
| 1724.7261 | 1723.7188 | 1723.8781 | -92.37 | 100   | 113 | 1    | ---  | K.YYDDDLKEIKPVAR.L                |
| 1731.9867 | 1730.9794 | 1730.8298 | 86.5   | 197   | 211 | 0    | ---  | K.GCAFTYDYLTLNLNR.L               |
| 2044.9095 | 2043.9022 | 2044.0741 | -84.11 | 107   | 123 | 1    | ---  | K.EIKPVARLEGQVDHYYK.G             |

No match to: 842.4471, 848.4654, 849.9925, 850.4734, 853.4557, 864.4832, 865.9639, 868.4844, 870.4808, 876.9719, 882.5003, 882.5003, 892.9417, 908.9123, 919.3989, 951.5530, 953.4604, 996.5237, 998.4718, 1017.5948, 1019.6071, 1033.6263, 1045.4912, 1051.6328, 1051.6328, 1065.5367, 1131.6298, 1136.6206, 1139.4833, 1142.5555, 1142.5555, 1151.6481, 1156.5005, 1165.6569, 1165.6569, 1175.5602, 1184.6132, 1247.6283, 1267.5582, 1267.5582, 1268.5472, 1300.7646, 1305.5656, 1311.6147, 1334.7938, 1334.7938, 1387.5682, 1387.5682, 1396.6301, 1439.7159, 1448.8251, 1455.6167, 1455.6167, 1475.6594, 1479.6964, 1479.6964, 1498.6063, 1513.6995, 1513.6995, 1550.6960, 1550.6960, 1617.9590, 1647.7349, 1901.1331, 2210.9834, 2283.0552

20. A0A4W2EGF3      Mass: 97654      Score: 46      Expect: 3.8      Matches: 13

Dynamin 3 OS=Bos indicus x Bos taurus OX=30522 GN=DNM3 PE=3 SV=1

| Observed  | Mr(expt)  | Mr(calc)  | ppm    | Start | End | Miss | Ions | Peptide                        |
|-----------|-----------|-----------|--------|-------|-----|------|------|--------------------------------|
| 927.4218  | 926.4145  | 926.4644  | -53.82 | 272   | 279 | 0    | ---  | R.MGTPHLQK.V + Oxidation (M)   |
| 1019.6071 | 1018.5998 | 1018.5672 | 32.0   | 229   | 237 | 1    | ---  | R.RGYVGVVNR.S                  |
| 1133.6357 | 1132.6284 | 1132.5910 | 33.0   | 247   | 256 | 1    | ---  | K.DIKAAMLAER.K + Oxidation (M) |
| 1136.6206 | 1135.6133 | 1135.6098 | 3.10   | 762   | 771 | 0    | ---  | R.RPPSPPTQR.R                  |
| 1142.5555 | 1141.5482 | 1141.6567 | -95.05 | 510   | 519 | 1    | ---  | K.NTIGNQVIRK.G                 |
| 1142.5555 | 1141.5483 | 1141.6567 | -95.01 | 509   | 518 | 1    | ---  | K.KNTIGNQVIRK.K                |
| 1156.5005 | 1155.4932 | 1155.5560 | -54.37 | 90    | 98  | 1    | ---  | K.KFTDFDEV.R.H                 |
| 1184.6132 | 1183.6059 | 1183.5729 | 27.9   | 158   | 166 | 0    | ---  | R.EMIMQFITR.E + Oxidation (M)  |



|                                                                                                                                                                                                                                                                                                                                                                                                                                                                                                                                                                                                                                                                                                                         |           |           |        |     |   |     |   |     |                   |
|-------------------------------------------------------------------------------------------------------------------------------------------------------------------------------------------------------------------------------------------------------------------------------------------------------------------------------------------------------------------------------------------------------------------------------------------------------------------------------------------------------------------------------------------------------------------------------------------------------------------------------------------------------------------------------------------------------------------------|-----------|-----------|--------|-----|---|-----|---|-----|-------------------|
| 1267.5582                                                                                                                                                                                                                                                                                                                                                                                                                                                                                                                                                                                                                                                                                                               | 1266.5509 | 1266.5703 | -15.28 | 78  | - | 87  | 0 | --- | K.AEYAEFLHCK.G    |
| 1267.5582                                                                                                                                                                                                                                                                                                                                                                                                                                                                                                                                                                                                                                                                                                               | 1266.5510 | 1266.5703 | -15.26 | 78  | - | 87  | 0 | --- | K.AEYAEFLHCK.G    |
| 1396.6301                                                                                                                                                                                                                                                                                                                                                                                                                                                                                                                                                                                                                                                                                                               | 1395.6228 | 1395.7068 | -60.15 | 658 | - | 669 | 0 | --- | R.NLVDSYMISINK.C  |
| 1513.6995                                                                                                                                                                                                                                                                                                                                                                                                                                                                                                                                                                                                                                                                                                               | 1512.6922 | 1512.8412 | -98.51 | 387 | - | 399 | 1 | 18  | R.EISYAIKNIHGIR.T |
| 1513.6995                                                                                                                                                                                                                                                                                                                                                                                                                                                                                                                                                                                                                                                                                                               | 1512.6922 | 1512.8412 | -98.49 | 387 | - | 399 | 1 | --- | R.EISYAIKNIHGIR.T |
| No match to: 805.4406, 842.4471, 848.4654, 849.9925, 850.4734, 853.4557, 864.4832, 865.9639, 868.4844, 870.4808, 876.9719, 882.5003, 882.5003, 892.9417, 908.9123, 919.3989, 951.5530, 953.4604, 996.5237, 998.4718, 1017.5948, 1033.6263, 1045.4912, 1051.6328, 1051.6328, 1065.5367, 1131.6298, 1139.4833, 1151.6481, 1165.6569, 1165.6569, 1175.5602, 1189.4962, 1247.6283, 1268.5472, 1287.5924, 1300.7646, 1305.5656, 1311.6147, 1334.7938, 1334.7938, 1387.5682, 1387.5682, 1439.7159, 1448.8251, 1455.6167, 1455.6167, 1475.6594, 1479.6964, 1479.6964, 1498.6063, 1550.6960, 1550.6960, 1557.7151, 1567.6414, 1567.6414, 1617.9590, 1647.7349, 1724.7261, 1731.9867, 1901.1331, 2044.9095, 2210.9834, 2283.0552 |           |           |        |     |   |     |   |     |                   |

21. [A0A3Q1MDN4](#) Mass: 96034 Score: 45 Expect: 4.1 Matches: 13

Uncharacterized protein OS=Bos taurus OX=9913 GN=DNM3 PE=3 SV=1

| Observed                                                                                                                                                                                                                                                                                                                                                                                                                                                                                                                                                                                                                                                                                                                | Mr(expt)  | Mr(calc)  | ppm    | Start | End   | Miss | Ions | Peptide                        |
|-------------------------------------------------------------------------------------------------------------------------------------------------------------------------------------------------------------------------------------------------------------------------------------------------------------------------------------------------------------------------------------------------------------------------------------------------------------------------------------------------------------------------------------------------------------------------------------------------------------------------------------------------------------------------------------------------------------------------|-----------|-----------|--------|-------|-------|------|------|--------------------------------|
| 927.4218                                                                                                                                                                                                                                                                                                                                                                                                                                                                                                                                                                                                                                                                                                                | 926.4145  | 926.4644  | -53.82 | 272   | - 279 | 0    | ---  | R.MGTPHLQK.V + Oxidation (M)   |
| 1019.6071                                                                                                                                                                                                                                                                                                                                                                                                                                                                                                                                                                                                                                                                                                               | 1018.5998 | 1018.5672 | 32.0   | 229   | - 237 | 1    | ---  | R.RGYGVGVNR.S                  |
| 1131.6298                                                                                                                                                                                                                                                                                                                                                                                                                                                                                                                                                                                                                                                                                                               | 1130.6225 | 1130.7063 | -74.10 | 839   | - 849 | 0    | ---  | R.LPQGLPLALLP.-                |
| 1133.6357                                                                                                                                                                                                                                                                                                                                                                                                                                                                                                                                                                                                                                                                                                               | 1132.6284 | 1132.5910 | 33.0   | 247   | - 256 | 1    | ---  | K.DIKAAMLAER.K + Oxidation (M) |
| 1142.5555                                                                                                                                                                                                                                                                                                                                                                                                                                                                                                                                                                                                                                                                                                               | 1141.5482 | 1141.6567 | -95.05 | 510   | - 519 | 1    | ---  | K.NTIGNQVIRK.G                 |
| 1142.5555                                                                                                                                                                                                                                                                                                                                                                                                                                                                                                                                                                                                                                                                                                               | 1141.5483 | 1141.6567 | -95.01 | 509   | - 518 | 1    | ---  | K.KNTIGNQVIR.K                 |
| 1156.5005                                                                                                                                                                                                                                                                                                                                                                                                                                                                                                                                                                                                                                                                                                               | 1155.4932 | 1155.5560 | -54.37 | 90    | - 98  | 1    | ---  | K.KFTDFDEV.R.H                 |
| 1184.6132                                                                                                                                                                                                                                                                                                                                                                                                                                                                                                                                                                                                                                                                                                               | 1183.6059 | 1183.5729 | 27.9   | 158   | - 166 | 0    | ---  | R.EMIMQFITR.E + Oxidation (M)  |
| 1267.5582                                                                                                                                                                                                                                                                                                                                                                                                                                                                                                                                                                                                                                                                                                               | 1266.5509 | 1266.5703 | -15.28 | 78    | - 87  | 0    | ---  | K.AEYAEFLHCK.G                 |
| 1267.5582                                                                                                                                                                                                                                                                                                                                                                                                                                                                                                                                                                                                                                                                                                               | 1266.5510 | 1266.5703 | -15.26 | 78    | - 87  | 0    | ---  | K.AEYAEFLHCK.G                 |
| 1396.6301                                                                                                                                                                                                                                                                                                                                                                                                                                                                                                                                                                                                                                                                                                               | 1395.6228 | 1395.7068 | -60.15 | 654   | - 665 | 0    | ---  | R.NLVDSYMSINK.C                |
| 1513.6995                                                                                                                                                                                                                                                                                                                                                                                                                                                                                                                                                                                                                                                                                                               | 1512.6922 | 1512.8412 | -98.51 | 387   | - 399 | 1    | 18   | R.EISYAIKNIHGIR.T              |
| 1513.6995                                                                                                                                                                                                                                                                                                                                                                                                                                                                                                                                                                                                                                                                                                               | 1512.6922 | 1512.8412 | -98.49 | 387   | - 399 | 1    | ---  | R.EISYAIKNIHGIR.T              |
| No match to: 805.4406, 842.4471, 848.4654, 849.9925, 850.4734, 853.4557, 864.4832, 865.9639, 868.4844, 870.4808, 876.9719, 882.5003, 882.5003, 892.9417, 908.9123, 919.3989, 951.5530, 953.4604, 996.5237, 998.4718, 1017.5948, 1033.6263, 1045.4912, 1051.6328, 1051.6328, 1065.5367, 1136.6206, 1139.4833, 1151.6481, 1165.6569, 1165.6569, 1175.5602, 1189.4962, 1247.6283, 1268.5472, 1287.5924, 1300.7646, 1305.5656, 1311.6147, 1334.7938, 1334.7938, 1387.5682, 1387.5682, 1439.7159, 1448.8251, 1455.6167, 1455.6167, 1475.6594, 1479.6964, 1479.6964, 1498.6063, 1550.6960, 1550.6960, 1557.7151, 1567.6414, 1567.6414, 1617.9590, 1647.7349, 1724.7261, 1731.9867, 1901.1331, 2044.9095, 2210.9834, 2283.0552 |           |           |        |       |       |      |      |                                |

22. [A0A4W2EI53](#) Mass: 63308 Score: 44 Expect: 5.7 Matches: 11

Dynamitin 3 OS=Bos indicus x Bos taurus OX=30522 GN=DNM3 PE=3 SV=1

| observed                                                                                                                                                                                                                                                                                                                                                                                                                                                                                                                                                                                                                                                                                                                           | Mr(expt)  | Mr(calc)  | ppm    | Start | End | Miss | Ions  | Peptide                        |
|------------------------------------------------------------------------------------------------------------------------------------------------------------------------------------------------------------------------------------------------------------------------------------------------------------------------------------------------------------------------------------------------------------------------------------------------------------------------------------------------------------------------------------------------------------------------------------------------------------------------------------------------------------------------------------------------------------------------------------|-----------|-----------|--------|-------|-----|------|-------|--------------------------------|
| 927.4218                                                                                                                                                                                                                                                                                                                                                                                                                                                                                                                                                                                                                                                                                                                           | 926.4145  | 926.4644  | -53.82 | 272   | -   | 279  | 0 --- | R.MGTPHLQK.V + Oxidation (M)   |
| 1019.6071                                                                                                                                                                                                                                                                                                                                                                                                                                                                                                                                                                                                                                                                                                                          | 1018.5998 | 1018.5672 | 32.0   | 229   | -   | 237  | 1 --- | R.RGYVGVVNR.S                  |
| 1133.6357                                                                                                                                                                                                                                                                                                                                                                                                                                                                                                                                                                                                                                                                                                                          | 1132.6284 | 1132.5910 | 33.0   | 247   | -   | 256  | 1 --- | K.DIKAAMLAER.K + Oxidation (M) |
| 1142.5555                                                                                                                                                                                                                                                                                                                                                                                                                                                                                                                                                                                                                                                                                                                          | 1141.5482 | 1141.6567 | -95.05 | 510   | -   | 519  | 1 --- | K.NTIGNQVIRK.G                 |
| 1142.5555                                                                                                                                                                                                                                                                                                                                                                                                                                                                                                                                                                                                                                                                                                                          | 1141.5483 | 1141.6567 | -95.01 | 509   | -   | 518  | 1 --- | K.KNTIGNQVIR.K                 |
| 1156.5005                                                                                                                                                                                                                                                                                                                                                                                                                                                                                                                                                                                                                                                                                                                          | 1155.4932 | 1155.5560 | -54.37 | 90    | -   | 98   | 1 --- | K.KFTDFDEVR.H                  |
| 1184.6132                                                                                                                                                                                                                                                                                                                                                                                                                                                                                                                                                                                                                                                                                                                          | 1183.6059 | 1183.5729 | 27.9   | 158   | -   | 166  | 0 --- | R.EMIMQFITR.E + Oxidation (M)  |
| 1267.5582                                                                                                                                                                                                                                                                                                                                                                                                                                                                                                                                                                                                                                                                                                                          | 1266.5509 | 1266.5703 | -15.28 | 78    | -   | 87   | 0 --- | K.AEYAEFLHCK.G                 |
| 1267.5582                                                                                                                                                                                                                                                                                                                                                                                                                                                                                                                                                                                                                                                                                                                          | 1266.5510 | 1266.5703 | -15.26 | 78    | -   | 87   | 0 --- | K.AEYAEFLHCK.G                 |
| 1513.6995                                                                                                                                                                                                                                                                                                                                                                                                                                                                                                                                                                                                                                                                                                                          | 1512.6922 | 1512.8412 | -98.51 | 387   | -   | 399  | 1 18  | R.EISYAIKNIHGIR.T              |
| 1513.6995                                                                                                                                                                                                                                                                                                                                                                                                                                                                                                                                                                                                                                                                                                                          | 1512.6922 | 1512.8412 | -98.49 | 387   | -   | 399  | 1 --- | R.EISYAIKNIHGIR.T              |
| No match to: 805.4406, 842.4471, 848.4654, 849.9925, 850.4734, 853.4557, 864.4832, 865.9639, 868.4844, 870.4808, 876.9719, 882.5003, 882.5003, 892.9417, 908.9123, 919.3989, 951.5530, 953.4604, 996.5237, 998.4718, 1017.5948, 1033.6263, 1045.4912, 1051.6328, 1051.6328, 1065.5367, 1131.6298, 1136.6206, 1139.4833, 1151.6481, 1165.6569, 1165.6569, 1175.5602, 1189.4962, 1247.6283, 1268.5472, 1287.5924, 1300.7646, 1305.5656, 1311.6147, 1334.7938, 1334.7938, 1387.5682, 1387.5682, 1439.7159, 1448.8251, 1455.6167, 1455.6167, 1475.6594, 1479.6964, 1479.6964, 1498.6063, 1550.6960, 1550.6960, 1557.7151, 1567.6414, 1567.6414, 1617.9590, 1647.7349, 1724.7261, 1731.9867, 1901.1331, 2044.9095, 2210.9834, 2283.0552 |           |           |        |       |     |      |       |                                |

23. [A0A4W2IJA6](#) Mass: 101091 Score: 43 Expect: 7.1 Matches: 14

Family with sequence similarity 111 member B OS=Bos indicus x Bos taurus OX=30522 GN=FAM11B PE=4 SV=1

| Observed                                                                                                                                                                                                                                                                                                                                                                                                                                                                                                                                                                                                                                                                                                      | Mr(expt)  | Mr(calc)  | ppm    | Start | End | Miss | Ions  | Peptide                           |
|---------------------------------------------------------------------------------------------------------------------------------------------------------------------------------------------------------------------------------------------------------------------------------------------------------------------------------------------------------------------------------------------------------------------------------------------------------------------------------------------------------------------------------------------------------------------------------------------------------------------------------------------------------------------------------------------------------------|-----------|-----------|--------|-------|-----|------|-------|-----------------------------------|
| 842.4471                                                                                                                                                                                                                                                                                                                                                                                                                                                                                                                                                                                                                                                                                                      | 841.4398  | 841.5021  | -74.03 | 528   | -   | 534  | 0 --- | K.NLQILNK.V                       |
| 998.4718                                                                                                                                                                                                                                                                                                                                                                                                                                                                                                                                                                                                                                                                                                      | 997.4645  | 997.5015  | -37.06 | 289   | -   | 297  | 0 --- | R.CLPSGSHLK.I                     |
| 1017.5948                                                                                                                                                                                                                                                                                                                                                                                                                                                                                                                                                                                                                                                                                                     | 1016.5875 | 1016.5363 | 50.4   | 88    | -   | 96   | 1 --- | R.NLDRGSLSR.H                     |
| 1045.4912                                                                                                                                                                                                                                                                                                                                                                                                                                                                                                                                                                                                                                                                                                     | 1044.4839 | 1044.5815 | -93.44 | 391   | -   | 400  | 0 --- | K.QSIVDIVSGK.V                    |
| 1136.6206                                                                                                                                                                                                                                                                                                                                                                                                                                                                                                                                                                                                                                                                                                     | 1135.6133 | 1135.5305 | 72.9   | 32    | -   | 41   | 1 --- | R.RCPHDAPGAR.L                    |
| 1156.5005                                                                                                                                                                                                                                                                                                                                                                                                                                                                                                                                                                                                                                                                                                     | 1155.4932 | 1155.5309 | -32.56 | 553   | -   | 560  | 1 --- | K.YFQEERER.M                      |
| 1247.6283                                                                                                                                                                                                                                                                                                                                                                                                                                                                                                                                                                                                                                                                                                     | 1246.6210 | 1246.6094 | 9.31   | 486   | -   | 494  | 1 --- | R.YYNNILYKR.L                     |
| 1305.5656                                                                                                                                                                                                                                                                                                                                                                                                                                                                                                                                                                                                                                                                                                     | 1304.5583 | 1304.6435 | -65.27 | 642   | -   | 652  | 0 --- | K.SWPDIISTCVK.V                   |
| 1396.6301                                                                                                                                                                                                                                                                                                                                                                                                                                                                                                                                                                                                                                                                                                     | 1395.6228 | 1395.6743 | -36.85 | 3     | -   | 15   | 0 --- | K.GQDGLKPDPEQGR.G                 |
| 1475.6594                                                                                                                                                                                                                                                                                                                                                                                                                                                                                                                                                                                                                                                                                                     | 1474.6521 | 1474.7892 | -92.97 | 628   | -   | 640  | 0 --- | R.HVLHLIVGESTDR.K                 |
| 1557.7151                                                                                                                                                                                                                                                                                                                                                                                                                                                                                                                                                                                                                                                                                                     | 1556.7078 | 1556.6703 | 24.1   | 449   | -   | 461  | 1 --- | K.DGETEDVEHNREK.I                 |
| 1567.6414                                                                                                                                                                                                                                                                                                                                                                                                                                                                                                                                                                                                                                                                                                     | 1566.6341 | 1566.7402 | -67.71 | 800   | -   | 812  | 0 7   | K.LVAMHSFGHFYSR.V + Oxidation (M) |
| 1567.6414                                                                                                                                                                                                                                                                                                                                                                                                                                                                                                                                                                                                                                                                                                     | 1566.6341 | 1566.7402 | -67.69 | 800   | -   | 812  | 0 --- | K.LVAMHSFGHFYSR.V + Oxidation (M) |
| 2044.9095                                                                                                                                                                                                                                                                                                                                                                                                                                                                                                                                                                                                                                                                                                     | 2043.9022 | 2044.0340 | -64.45 | 642   | -   | 658  | 1 --- | K.SWPDIISTCVKVTFITYK.E            |
| No match to: 805.4406, 848.4654, 849.9925, 850.4734, 853.4557, 864.4832, 865.9639, 868.4844, 870.4808, 876.9719, 882.5003, 882.5003, 892.9417, 908.9123, 919.3989, 927.4218, 951.5530, 953.4604, 996.5237, 1019.6071, 1033.6263, 1051.6328, 1051.6328, 1065.5367, 1131.6298, 1133.6357, 1139.4833, 1142.5555, 1142.5555, 1151.6481, 1165.6569, 1165.6569, 1175.5602, 1184.6132, 1189.4962, 1267.5582, 1267.5582, 1268.5472, 1287.5924, 1300.7646, 1311.6147, 1334.7938, 1334.7938, 1387.5682, 1387.5682, 1439.7159, 1448.8251, 1455.6167, 1455.6167, 1479.6964, 1479.6964, 1498.6063, 1513.6995, 1513.6995, 1550.6960, 1550.6960, 1617.9590, 1647.7349, 1724.7261, 1731.9867, 1901.1331, 2210.9834, 2283.0552 |           |           |        |       |     |      |       |                                   |

24. [A0A4W2ED96](#) Mass: 52578 Score: 42 Expect: 7.7 Matches: 13

6-phosphofructo-2-kinase/fructose-2,6-biphosphatase 1 OS=Bos indicus x Bos taurus OX=30522 GN=PFKFB1 PE=4 SV=1

| Observed  | Mr(expt)  | Mr(calc)  | ppm    | Start | End | Miss | Ions | Peptide                |
|-----------|-----------|-----------|--------|-------|-----|------|------|------------------------|
| 850.4734  | 849.4661  | 849.4014  | 76.2   | 1     | -   | 7    | 1    | --- -.MEEKASR.R        |
| 996.5237  | 995.5164  | 995.5189  | -2.45  | 52    | -   | 59   | 0    | --- K.VFNLGQYR.R       |
| 1019.6071 | 1018.5998 | 1018.5811 | 18.4   | 166   | -   | 173  | 1    | --- K.VLEDFLKR.I       |
| 1051.6328 | 1050.6255 | 1050.5233 | 97.3   | 385   | -   | 393  | 0    | --- K.SSDELPYLK.C      |
| 1051.6328 | 1050.6255 | 1050.5233 | 97.3   | 385   | -   | 393  | 0    | --- K.SSDELPYLK.C      |
| 1142.5555 | 1141.5482 | 1141.5842 | -31.47 | 376   | -   | 384  | 0    | --- R.CLLAYFLDK.S      |
| 1142.5555 | 1141.5483 | 1141.5842 | -31.44 | 376   | -   | 384  | 0    | --- R.CLLAYFLDK.S      |
| 1267.5582 | 1266.5509 | 1266.6429 | -72.59 | 236   | -   | 246  | 1    | --- R.HGESENLNRGR.I    |
| 1267.5582 | 1266.5510 | 1266.6429 | -72.57 | 236   | -   | 246  | 1    | 13 R.HGESENLNRGR.I     |
| 1479.6964 | 1478.6891 | 1478.7478 | -39.65 | 104   | -   | 116  | 1    | --- R.VAVFDATNTTTRER.R |
| 1479.6964 | 1478.6891 | 1478.7478 | -39.64 | 104   | -   | 116  | 1    | --- R.VAVFDATNTTTRER.R |
| 1567.6414 | 1566.6341 | 1566.6984 | -41.06 | 153   | -   | 165  | 1    | --- K.LGSPDYIDCDREK.V  |

1567.6414 1566.6341 1566.6984 -41.03 153 - 165 1 --- K.LGSPDYIDCDREK.V  
**No match to:** 805.4406, 842.4471, 848.4654, 849.9925, 853.4557, 864.4832, 865.9639, 868.4844, 870.4808, 876.9719, 882.5003, 882.5003, 892.9417, 908.9123, 919.3989, 927.4218, 951.5530, 953.4604, 998.4718, 1017.5948, 1033.6263, 1045.4912, 1065.5367, 1131.6298, 1133.6357, 1136.6206, 1139.4833, 1151.6481, 1156.5005, 1165.6569, 1165.6569, 1165.6569, 1175.5602, 1184.6132, 1189.4962, 1247.6283, 1268.5472, 1287.5924, 1300.7646, 1305.5656, 1311.6147, 1334.7938, 1334.7938, 1387.5682, 1387.5682, 1396.6301, 1439.7159, 1448.8251, 1455.6167, 1455.6167, 1475.6594, 1498.6063, 1513.6995, 1513.6995, 1550.6960, 1550.6960, 1557.7151, 1617.9590, 1647.7349, 1724.7261, 1731.9867, 1901.1331, 2044.9095, 2210.9834, 2283.0552

25. [A0A3Q1LXR0](#) Mass: 52578 Score: 42 Expect: 7.7 Matches: 13  
6-phosphofructo-2-kinase/fructose-2,6-bisphosphatase 1 OS=Bos taurus OX=9913 GN=PFKFB1 PE=4 SV=1

| Observed                                                                                                                                                                                                                                                                                                                                                                                                                                                                                                                                                                                                                                                                                                                                   | Mr(expt)  | Mr(calc)  | ppm    | Start | End | Miss | Ions | Peptide              |
|--------------------------------------------------------------------------------------------------------------------------------------------------------------------------------------------------------------------------------------------------------------------------------------------------------------------------------------------------------------------------------------------------------------------------------------------------------------------------------------------------------------------------------------------------------------------------------------------------------------------------------------------------------------------------------------------------------------------------------------------|-----------|-----------|--------|-------|-----|------|------|----------------------|
| 850.4734                                                                                                                                                                                                                                                                                                                                                                                                                                                                                                                                                                                                                                                                                                                                   | 849.4661  | 849.4014  | 76.2   | 1     | -   | 7    | 1    | --MEEKASR.R          |
| 996.5237                                                                                                                                                                                                                                                                                                                                                                                                                                                                                                                                                                                                                                                                                                                                   | 995.5164  | 995.5189  | -2.45  | 52    | -   | 59   | 0    | --K.VFNLGQYR.R       |
| 1019.6071                                                                                                                                                                                                                                                                                                                                                                                                                                                                                                                                                                                                                                                                                                                                  | 1018.5998 | 1018.5811 | 18.4   | 166   | -   | 173  | 1    | --K.VLEDFLKR.I       |
| 1051.6328                                                                                                                                                                                                                                                                                                                                                                                                                                                                                                                                                                                                                                                                                                                                  | 1050.6255 | 1050.5233 | 97.3   | 385   | -   | 393  | 0    | --K.SSDELPYLK.C      |
| 1051.6328                                                                                                                                                                                                                                                                                                                                                                                                                                                                                                                                                                                                                                                                                                                                  | 1050.6255 | 1050.5233 | 97.3   | 385   | -   | 393  | 0    | --K.SSDELPYLK.C      |
| 1142.5555                                                                                                                                                                                                                                                                                                                                                                                                                                                                                                                                                                                                                                                                                                                                  | 1141.5482 | 1141.5842 | -31.47 | 376   | -   | 384  | 0    | --R.CLLAYFLDK.S      |
| 1142.5555                                                                                                                                                                                                                                                                                                                                                                                                                                                                                                                                                                                                                                                                                                                                  | 1141.5483 | 1141.5842 | -31.44 | 376   | -   | 384  | 0    | --R.CLLAYFLDK.S      |
| 1267.5582                                                                                                                                                                                                                                                                                                                                                                                                                                                                                                                                                                                                                                                                                                                                  | 1266.5509 | 1266.6429 | -72.59 | 236   | -   | 246  | 1    | --R.HGESENLNRGR.I    |
| 1267.5582                                                                                                                                                                                                                                                                                                                                                                                                                                                                                                                                                                                                                                                                                                                                  | 1266.5510 | 1266.6429 | -72.57 | 236   | -   | 246  | 1    | 13 R.HGESENLNRGR.I   |
| 1479.6964                                                                                                                                                                                                                                                                                                                                                                                                                                                                                                                                                                                                                                                                                                                                  | 1478.6891 | 1478.7478 | -39.65 | 104   | -   | 116  | 1    | --R.VAVFDATNTTTRER.R |
| 1479.6964                                                                                                                                                                                                                                                                                                                                                                                                                                                                                                                                                                                                                                                                                                                                  | 1478.6891 | 1478.7478 | -39.64 | 104   | -   | 116  | 1    | --R.VAVFDATNTTTRER.R |
| 1567.6414                                                                                                                                                                                                                                                                                                                                                                                                                                                                                                                                                                                                                                                                                                                                  | 1566.6341 | 1566.6984 | -41.06 | 153   | -   | 165  | 1    | --K.LGSPDYIDCDREK.V  |
| 1567.6414                                                                                                                                                                                                                                                                                                                                                                                                                                                                                                                                                                                                                                                                                                                                  | 1566.6341 | 1566.6984 | -41.03 | 153   | -   | 165  | 1    | --K.LGSPDYIDCDREK.V  |
| <b>No match to:</b> 805.4406, 842.4471, 848.4654, 849.9925, 853.4557, 864.4832, 865.9639, 868.4844, 870.4808, 876.9719, 882.5003, 882.5003, 892.9417, 908.9123, 919.3989, 927.4218, 951.5530, 953.4604, 998.4718, 1017.5948, 1033.6263, 1045.4912, 1065.5367, 1131.6298, 1133.6357, 1136.6206, 1139.4833, 1151.6481, 1156.5005, 1165.6569, 1165.6569, 1165.6569, 1175.5602, 1184.6132, 1189.4962, 1247.6283, 1268.5472, 1287.5924, 1300.7646, 1305.5656, 1311.6147, 1334.7938, 1334.7938, 1387.5682, 1387.5682, 1396.6301, 1439.7159, 1448.8251, 1455.6167, 1455.6167, 1475.6594, 1498.6063, 1513.6995, 1513.6995, 1550.6960, 1550.6960, 1557.7151, 1617.9590, 1647.7349, 1724.7261, 1731.9867, 1901.1331, 2044.9095, 2210.9834, 2283.0552 |           |           |        |       |     |      |      |                      |

26. [A0A4W2EAW9](#) Mass: 72734 Score: 40 Expect: 13 Matches: 11  
Dynamilin 3 OS=Bos indicus x Bos taurus OX=30522 GN=DNM3 PE=3 SV=1

| Observed                                                                                                                                                                                                                                                                                                                                                                                                                                                                                                                                                                                                                                                                                                                                             | Mr(expt)  | Mr(calc)  | ppm    | Start | End | Miss | Ions | Peptide                          |
|------------------------------------------------------------------------------------------------------------------------------------------------------------------------------------------------------------------------------------------------------------------------------------------------------------------------------------------------------------------------------------------------------------------------------------------------------------------------------------------------------------------------------------------------------------------------------------------------------------------------------------------------------------------------------------------------------------------------------------------------------|-----------|-----------|--------|-------|-----|------|------|----------------------------------|
| 927.4218                                                                                                                                                                                                                                                                                                                                                                                                                                                                                                                                                                                                                                                                                                                                             | 926.4145  | 926.4644  | -53.82 | 272   | -   | 279  | 0    | --R.MGTPHLQK.V + Oxidation (M)   |
| 1019.6071                                                                                                                                                                                                                                                                                                                                                                                                                                                                                                                                                                                                                                                                                                                                            | 1018.5998 | 1018.5672 | 32.0   | 229   | -   | 237  | 1    | --R.RGVYGVVNR.S                  |
| 1133.6357                                                                                                                                                                                                                                                                                                                                                                                                                                                                                                                                                                                                                                                                                                                                            | 1132.6284 | 1132.5910 | 33.0   | 247   | -   | 256  | 1    | --K.DIKAAMLAER.K + Oxidation (M) |
| 1142.5555                                                                                                                                                                                                                                                                                                                                                                                                                                                                                                                                                                                                                                                                                                                                            | 1141.5482 | 1141.6567 | -95.05 | 510   | -   | 519  | 1    | --K.NTIGNQVIRK.G                 |
| 1142.5555                                                                                                                                                                                                                                                                                                                                                                                                                                                                                                                                                                                                                                                                                                                                            | 1141.5483 | 1141.6567 | -95.01 | 509   | -   | 518  | 1    | --K.NTIGNQVIRK.G                 |
| 1156.5005                                                                                                                                                                                                                                                                                                                                                                                                                                                                                                                                                                                                                                                                                                                                            | 1155.4932 | 1155.5560 | -54.37 | 90    | -   | 98   | 1    | --K.KFTDFDEVR.H                  |
| 1184.6132                                                                                                                                                                                                                                                                                                                                                                                                                                                                                                                                                                                                                                                                                                                                            | 1183.6059 | 1183.5729 | 27.9   | 158   | -   | 166  | 0    | --R.EMIMQFTR.E + Oxidation (M)   |
| 1267.5582                                                                                                                                                                                                                                                                                                                                                                                                                                                                                                                                                                                                                                                                                                                                            | 1266.5509 | 1266.5703 | -15.28 | 78    | -   | 87   | 0    | --K.AEYAEFLHCK.G                 |
| 1267.5582                                                                                                                                                                                                                                                                                                                                                                                                                                                                                                                                                                                                                                                                                                                                            | 1266.5510 | 1266.5703 | -15.26 | 78    | -   | 87   | 0    | --K.AEYAEFLHCK.G                 |
| 1513.6995                                                                                                                                                                                                                                                                                                                                                                                                                                                                                                                                                                                                                                                                                                                                            | 1512.6922 | 1512.8412 | -98.51 | 387   | -   | 399  | 1    | 18 R.EISYAIKNIHGIR.T             |
| 1513.6995                                                                                                                                                                                                                                                                                                                                                                                                                                                                                                                                                                                                                                                                                                                                            | 1512.6922 | 1512.8412 | -98.49 | 387   | -   | 399  | 1    | --R.EISYAIKNIHGIR.T              |
| <b>No match to:</b> 805.4406, 842.4471, 848.4654, 849.9925, 850.4734, 853.4557, 864.4832, 865.9639, 868.4844, 870.4808, 876.9719, 882.5003, 882.5003, 892.9417, 908.9123, 919.3989, 951.5530, 953.4604, 996.5237, 998.4718, 1017.5948, 1033.6263, 1045.4912, 1051.6328, 1051.6328, 1065.5367, 1131.6298, 1136.6206, 1139.4833, 1151.6481, 1165.6569, 1165.6569, 1175.5602, 1184.6132, 1189.4962, 1247.6283, 1268.5472, 1287.5924, 1300.7646, 1305.5656, 1311.6147, 1334.7938, 1334.7938, 1387.5682, 1387.5682, 1396.6301, 1439.7159, 1448.8251, 1455.6167, 1455.6167, 1475.6594, 1479.6964, 1498.6063, 1513.6995, 1513.6995, 1550.6960, 1550.6960, 1557.7151, 1617.9590, 1647.7349, 1724.7261, 1731.9867, 1901.1331, 2044.9095, 2210.9834, 2283.0552 |           |           |        |       |     |      |      |                                  |

27. [A0A4W2GW83](#) Mass: 70119 Score: 40 Expect: 13 Matches: 6  
Albumin OS=Bos indicus x Bos taurus OX=30522 GN=ALB PE=4 SV=1

| Observed                                                                                                                                                                                                                                                                                                                                                                                                                                                                                                                                                                                                                                                                                                                                                                                                    | Mr(expt)  | Mr(calc)  | ppm    | Start | End | Miss | Ions | Peptide                |
|-------------------------------------------------------------------------------------------------------------------------------------------------------------------------------------------------------------------------------------------------------------------------------------------------------------------------------------------------------------------------------------------------------------------------------------------------------------------------------------------------------------------------------------------------------------------------------------------------------------------------------------------------------------------------------------------------------------------------------------------------------------------------------------------------------------|-----------|-----------|--------|-------|-----|------|------|------------------------|
| 927.4218                                                                                                                                                                                                                                                                                                                                                                                                                                                                                                                                                                                                                                                                                                                                                                                                    | 926.4145  | 926.4861  | -77.29 | 152   | -   | 158  | 0    | --K.YLYEIAER.R         |
| 1017.5948                                                                                                                                                                                                                                                                                                                                                                                                                                                                                                                                                                                                                                                                                                                                                                                                   | 1016.5875 | 1016.5727 | 14.6   | 203   | -   | 211  | 1    | --K.VLTSSARQR.L        |
| 1439.7159                                                                                                                                                                                                                                                                                                                                                                                                                                                                                                                                                                                                                                                                                                                                                                                                   | 1438.7086 | 1438.8045 | -66.61 | 351   | -   | 362  | 1    | --R.RHPEYAVSVLLR.L     |
| 1567.6414                                                                                                                                                                                                                                                                                                                                                                                                                                                                                                                                                                                                                                                                                                                                                                                                   | 1566.6341 | 1566.7354 | -64.69 | 338   | -   | 350  | 0    | 27 K.DAFLGSFLYEYSR.R   |
| 1567.6414                                                                                                                                                                                                                                                                                                                                                                                                                                                                                                                                                                                                                                                                                                                                                                                                   | 1566.6341 | 1566.7354 | -64.67 | 338   | -   | 350  | 0    | --K.DAFLGSFLYEYSR.R    |
| 2044.9095                                                                                                                                                                                                                                                                                                                                                                                                                                                                                                                                                                                                                                                                                                                                                                                                   | 2043.9022 | 2044.0206 | -57.93 | 159   | -   | 174  | 1    | --R.RHPYFYAPELLYYANK.Y |
| <b>No match to:</b> 805.4406, 842.4471, 848.4654, 849.9925, 850.4734, 853.4557, 864.4832, 865.9639, 868.4844, 870.4808, 876.9719, 882.5003, 882.5003, 892.9417, 908.9123, 919.3989, 951.5530, 953.4604, 996.5237, 998.4718, 1019.6071, 1033.6263, 1045.4912, 1051.6328, 1051.6328, 1065.5367, 1131.6298, 1133.6357, 1136.6206, 1139.4833, 1142.5555, 1142.5555, 1151.6481, 1156.5005, 1165.6569, 1165.6569, 1175.5602, 1184.6132, 1189.4962, 1247.6283, 1267.5582, 1267.5582, 1268.5472, 1287.5924, 1300.7646, 1305.5656, 1311.6147, 1334.7938, 1334.7938, 1387.5682, 1387.5682, 1396.6301, 1448.8251, 1455.6167, 1455.6167, 1475.6594, 1479.6964, 1479.6964, 1498.6063, 1513.6995, 1513.6995, 1550.6960, 1550.6960, 1557.7151, 1617.9590, 1647.7349, 1724.7261, 1731.9867, 1901.1331, 2210.9834, 2283.0552 |           |           |        |       |     |      |      |                        |

28. [B0JYQ0](#) Mass: 71244 Score: 40 Expect: 14 Matches: 6  
ALB protein OS=Bos taurus OX=9913 GN=ALB PE=2 SV=1

| Observed                                                                                                                                                                                                                                                                                                                                                                                                                                                                                                                                                                                                                                                                                                                                                                                                    | Mr(expt)  | Mr(calc)  | ppm    | Start | End | Miss | Ions | Peptide                |
|-------------------------------------------------------------------------------------------------------------------------------------------------------------------------------------------------------------------------------------------------------------------------------------------------------------------------------------------------------------------------------------------------------------------------------------------------------------------------------------------------------------------------------------------------------------------------------------------------------------------------------------------------------------------------------------------------------------------------------------------------------------------------------------------------------------|-----------|-----------|--------|-------|-----|------|------|------------------------|
| 927.4218                                                                                                                                                                                                                                                                                                                                                                                                                                                                                                                                                                                                                                                                                                                                                                                                    | 926.4145  | 926.4861  | -77.29 | 161   | -   | 167  | 0    | --K.YLYEIAER.R         |
| 1017.5948                                                                                                                                                                                                                                                                                                                                                                                                                                                                                                                                                                                                                                                                                                                                                                                                   | 1016.5875 | 1016.5727 | 14.6   | 212   | -   | 220  | 1    | --K.VLTSSARQR.L        |
| 1439.7159                                                                                                                                                                                                                                                                                                                                                                                                                                                                                                                                                                                                                                                                                                                                                                                                   | 1438.7086 | 1438.8045 | -66.61 | 360   | -   | 371  | 1    | --R.RHPEYAVSVLLR.L     |
| 1567.6414                                                                                                                                                                                                                                                                                                                                                                                                                                                                                                                                                                                                                                                                                                                                                                                                   | 1566.6341 | 1566.7354 | -64.69 | 347   | -   | 359  | 0    | 27 K.DAFLGSFLYEYSR.R   |
| 1567.6414                                                                                                                                                                                                                                                                                                                                                                                                                                                                                                                                                                                                                                                                                                                                                                                                   | 1566.6341 | 1566.7354 | -64.67 | 347   | -   | 359  | 0    | --K.DAFLGSFLYEYSR.R    |
| 2044.9095                                                                                                                                                                                                                                                                                                                                                                                                                                                                                                                                                                                                                                                                                                                                                                                                   | 2043.9022 | 2044.0206 | -57.93 | 168   | -   | 183  | 1    | --R.RHPYFYAPELLYYANK.Y |
| <b>No match to:</b> 805.4406, 842.4471, 848.4654, 849.9925, 850.4734, 853.4557, 864.4832, 865.9639, 868.4844, 870.4808, 876.9719, 882.5003, 882.5003, 892.9417, 908.9123, 919.3989, 951.5530, 953.4604, 996.5237, 998.4718, 1019.6071, 1033.6263, 1045.4912, 1051.6328, 1051.6328, 1065.5367, 1131.6298, 1133.6357, 1136.6206, 1139.4833, 1142.5555, 1142.5555, 1151.6481, 1156.5005, 1165.6569, 1165.6569, 1175.5602, 1184.6132, 1189.4962, 1247.6283, 1267.5582, 1267.5582, 1268.5472, 1287.5924, 1300.7646, 1305.5656, 1311.6147, 1334.7938, 1334.7938, 1387.5682, 1387.5682, 1396.6301, 1448.8251, 1455.6167, 1455.6167, 1475.6594, 1479.6964, 1479.6964, 1498.6063, 1513.6995, 1513.6995, 1550.6960, 1550.6960, 1557.7151, 1617.9590, 1647.7349, 1724.7261, 1731.9867, 1901.1331, 2210.9834, 2283.0552 |           |           |        |       |     |      |      |                        |

29. [A0A4W2D9L2](#) Mass: 98304 Score: 39 Expect: 16 Matches: 11  
Dynamilin 3 OS=Bos indicus x Bos taurus OX=30522 GN=DNM3 PE=3 SV=1

| Observed  | Mr(expt)  | Mr(calc)  | ppm    | Start | End | Miss | Ions | Peptide                          |
|-----------|-----------|-----------|--------|-------|-----|------|------|----------------------------------|
| 927.4218  | 926.4145  | 926.4644  | -53.82 | 272   | -   | 279  | 0    | --R.MGTPHLQK.V + Oxidation (M)   |
| 1019.6071 | 1018.5998 | 1018.5672 | 32.0   | 229   | -   | 237  | 1    | --R.RGVYGVVNR.S                  |
| 1133.6357 | 1132.6284 | 1132.5910 | 33.0   | 247   | -   | 256  | 1    | --K.DIKAAMLAER.K + Oxidation (M) |
| 1136.6206 | 1135.6133 | 1135.6098 | 3.10   | 768   | -   | 777  | 0    | --R.RPPSPPTTQR.R                 |
| 1156.5005 | 1155.4932 | 1155.5560 | -54.37 | 90    | -   | 98   | 1    | --K.KFTDFDEVR.H                  |
| 1184.6132 | 1183.6059 | 1183.5729 | 27.9   | 158   | -   | 166  | 0    | --R.EMIMQFTR.E + Oxidation (M)   |
| 1267.5582 | 1266.5509 | 1266.5703 | -15.28 | 78    | -   | 87   | 0    | --K.AEYAEFLHCK.G                 |

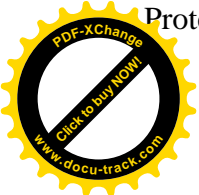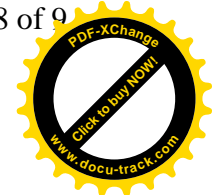

1267.5582 1266.5510 1266.5703 -15.26 78 - 87 0 --- K.AEYAEFLHCK.G  
 1396.6301 1395.6228 1395.7068 -60.15 664 - 675 0 --- R.NLVDSYMSIINK.C  
 1513.6995 1512.6922 1512.8412 -98.51 387 - 399 1 18 R.EISYAIKNIHGIR.T  
 1513.6995 1512.6922 1512.8412 -98.49 387 - 399 1 --- R.EISYAIKNIHGIR.T

No match to: 805.4406, 842.4471, 848.4654, 849.9925, 850.4734, 853.4557, 864.4832, 865.9639, 868.4844, 870.4808, 876.9719, 882.5003, 882.5003, 892.9417, 908.9123, 919.3989, 951.5530, 953.4604, 996.5237, 998.4718, 1017.5948, 1033.6263, 1045.4912, 1051.6328, 1051.6328, 1065.5367, 1131.6298, 1139.4833, 1142.5555, 1142.5555, 1151.6481, 1165.6569, 1165.6569, 1175.5602, 1189.4962, 1247.6283, 1268.5472, 1287.5924, 1300.7646, 1305.5656, 1311.6147, 1334.7938, 1334.7938, 1387.5682, 1387.5682, 1439.7159, 1448.8251, 1455.6167, 1455.6167, 1475.6594, 1479.6964, 1498.6063, 1550.6960, 1550.6960, 1557.7151, 1567.6414, 1567.6414, 1617.9590, 1647.7349, 1724.7261, 1731.9867, 1901.1331, 2044.9095, 2210.9834, 2283.0552

30. A0A4W2IKT9 Mass: 75992 Score: 39 Expect: 17 Matches: 6

Albumin OS=Bos indicus x Bos taurus OX=30522 GN=ALB PE=4 SV=1

| Observed  | Mr(expt)  | Mr(calc)  | ppm    | Start | End | Miss | Ions | Peptide                  |
|-----------|-----------|-----------|--------|-------|-----|------|------|--------------------------|
| 927.4218  | 926.4145  | 926.4861  | -77.29 | 161   | -   | 167  | 0    | --- K.YLYEIAR.R          |
| 1017.5948 | 1016.5875 | 1016.5727 | 14.6   | 212   | -   | 220  | 1    | --- K.VLTSSARQR.L        |
| 1439.7159 | 1438.7086 | 1438.8045 | -66.61 | 360   | -   | 371  | 1    | --- R.RHPEYAVSVLLR.L     |
| 1567.6414 | 1566.6341 | 1566.7354 | -64.69 | 347   | -   | 359  | 0    | 27 K.DAFLGSFLYEYSR.R     |
| 1567.6414 | 1566.6341 | 1566.7354 | -64.67 | 347   | -   | 359  | 0    | --- K.DAFLGSFLYEYSR.R    |
| 2044.9095 | 2043.9022 | 2044.0206 | -57.93 | 168   | -   | 183  | 1    | --- R.RHPFYFAPELLYYANK.Y |

No match to: 805.4406, 842.4471, 848.4654, 849.9925, 850.4734, 853.4557, 864.4832, 865.9639, 868.4844, 870.4808, 876.9719, 882.5003, 882.5003, 892.9417, 908.9123, 919.3989, 951.5530, 953.4604, 996.5237, 998.4718, 1019.6071, 1033.6263, 1045.4912, 1051.6328, 1051.6328, 1065.5367, 1131.6298, 1133.6357, 1136.6206, 1139.4833, 1142.5555, 1142.5555, 1151.6481, 1156.5005, 1165.6569, 1165.6569, 1175.5602, 1184.6132, 1189.4962, 1247.6283, 1267.5582, 1267.5582, 1268.5472, 1287.5924, 1300.7646, 1305.5656, 1311.6147, 1334.7938, 1334.7938, 1387.5682, 1387.5682, 1396.6301, 1448.8251, 1455.6167, 1455.6167, 1475.6594, 1479.6964, 1479.6964, 1498.6063, 1513.6995, 1513.6995, 1550.6960, 1550.6960, 1557.7151, 1617.9590, 1647.7349, 1724.7261, 1731.9867, 1901.1331, 2210.9834, 2283.0552

## Search Parameters

Type of search : Sequence Query  
 Enzyme : Trypsin  
 Fixed modifications : [Carbamidomethyl \(C\)](#)  
 Variable modifications : [Oxidation \(M\)](#)  
 Mass values : Monoisotopic  
 Protein Mass : Unrestricted  
 Peptide Mass Tolerance : ± 100 ppm  
 Fragment Mass Tolerance : ± 0.3 Da  
 Max Missed Cleavages : 1  
 Instrument type : MALDI-TOF-TOF

Query1 (805.4406,1+): <no title>  
 Query2 (842.4471,1+): <no title>  
 Query3 (848.4654,1+): <no title>  
 Query4 (849.9925,1+): <no title>  
 Query5 (850.4734,1+): <no title>  
 Query6 (853.4557,1+): <no title>  
 Query7 (864.4832,1+): <no title>  
 Query8 (865.9639,1+): <no title>  
 Query9 (868.4844,1+): <no title>  
 Query10 (870.4808,1+): <no title>  
 Query11 (876.9719,1+): <no title>  
 Query12 (882.5003,1+): <no title>  
 Query13 (882.5003,1+): Locus:1..14.0.7  
 Query14 (892.9417,1+): <no title>  
 Query15 (908.9123,1+): <no title>  
 Query16 (919.3989,1+): <no title>  
 Query17 (927.4218,1+): <no title>  
 Query18 (951.5530,1+): <no title>  
 Query19 (953.4604,1+): <no title>  
 Query20 (996.5237,1+): <no title>  
 Query21 (998.4718,1+): <no title>  
 Query22 (1017.5948,1+): <no title>  
 Query23 (1019.6071,1+): <no title>  
 Query24 (1033.6263,1+): <no title>  
 Query25 (1045.4912,1+): <no title>  
 Query26 (1051.6328,1+): <no title>  
 Query27 (1051.6328,1+): Locus:1..14.0.6  
 Query28 (1065.5367,1+): <no title>  
 Query29 (1131.6298,1+): <no title>  
 Query30 (1133.6357,1+): <no title>  
 Query31 (1136.6206,1+): <no title>  
 Query32 (1139.4833,1+): <no title>  
 Query33 (1142.5555,1+): <no title>  
 Query34 (1142.5555,1+): Locus:1..14.0.12  
 Query35 (1151.6481,1+): <no title>  
 Query36 (1156.5005,1+): <no title>  
 Query37 (1165.6569,1+): Locus:1..14.0.10  
 Query38 (1165.6569,1+): <no title>  
 Query39 (1175.5602,1+): <no title>  
 Query40 (1184.6132,1+): <no title>  
 Query41 (1189.4962,1+): <no title>  
 Query42 (1247.6283,1+): <no title>  
 Query43 (1267.5582,1+): <no title>  
 Query44 (1267.5582,1+): Locus:1..14.0.2  
 Query45 (1268.5472,1+): <no title>  
 Query46 (1287.5924,1+): <no title>  
 Query47 (1300.7646,1+): <no title>  
 Query48 (1305.5656,1+): <no title>  
 Query49 (1311.6147,1+): <no title>  
 Query50 (1334.7938,1+): <no title>  
 Query51 (1334.7938,1+): Locus:1..14.0.9  
 Query52 (1387.5682,1+): <no title>  
 Query53 (1387.5682,1+): Locus:1..14.0.3  
 Query54 (1396.6301,1+): <no title>  
 Query55 (1439.7159,1+): <no title>  
 Query56 (1448.8251,1+): <no title>  
 Query57 (1455.6167,1+): <no title>  
 Query58 (1455.6167,1+): Locus:1..14.0.1  
 Query59 (1475.6594,1+): <no title>  
 Query60 (1479.6964,1+): <no title>  
 Query61 (1479.6964,1+): Locus:1..14.0.5  
 Query62 (1498.6063,1+): <no title>  
 Query63 (1513.6995,1+): Locus:1..14.0.4



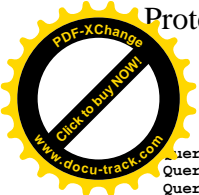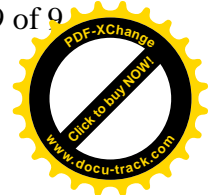

Query64 (1513.6995,1+): <no title>  
Query65 (1550.6960,1+): <no title>  
Query66 (1550.6960,1+): Locus:1..14.0.11  
Query67 (1557.7151,1+): <no title>  
Query68 (1567.6414,1+): Locus:1..14.0.8  
Query69 (1567.6414,1+): <no title>  
Query70 (1617.9590,1+): <no title>  
Query71 (1647.7349,1+): <no title>  
Query72 (1724.7261,1+): <no title>  
Query73 (1731.9867,1+): <no title>  
Query74 (1901.1331,1+): <no title>  
Query75 (2044.9095,1+): <no title>  
Query76 (2210.9834,1+): <no title>  
Query77 (2283.0552,1+): <no title>

Mascot: <http://www.matrixscience.com/>
