# Supplementary material for: Alpha-2-Macroglobulin as a New Promising Biomarker Improving the Diagnostic Sensitivity of Bovine Paratuberculosis
Source: Frontiers journal article supplement (doi:10.3389/fvets.2021.637716), 2021-03-05
Supplement: Data_Sheet_1.zip [file Data_Sheet_1.zip]

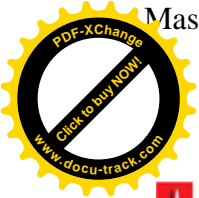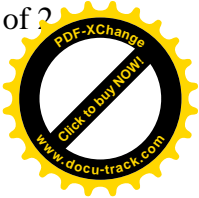

# MASCOT Search Results

## Protein View: Q693V9

Complement component 3d (Fragment) OS=Bos taurus OX=9913 PE=2 SV=1

Database: Uniprot\_bovine  
Score: 251  
Expect: 1.1e-020  
Nominal mass (M<sub>r</sub>): 34593  
Calculated pI: 6.68

Sequence similarity is available as [an NCBI BLAST search of Q693V9 against nr.](#)

### Search parameters

Enzyme: Trypsin: cuts C-term side of KR unless next residue is P.  
Fixed modifications: [Carbamidomethyl \(C\)](#)  
Variable modifications: [Oxidation \(M\)](#)

Protein sequence coverage: 48%

Matched peptides shown in **bold red**.

1 HLIQTPSGCG EQNMIGMTPT VIAVHYLDST DQWEKFGLEK **RQESLELIRK**  
51 **GYTQQLAFRQ** KSSAYAAFQY RPPSTWLTAY VVKVFALAAN LIAIDSKDLC  
101 ETVKWLILEK **QKPDGIFQED** GPVIHQEMIG GFRDTREKDV SLTAFVLIAL  
151 HEAK**DICEAQ** VNSLGRSIK **AGDFLENHYR** ELRRPYTVAI **AAYALALLGK**  
201 LEGDRLTKFL NTAKEN**NRWE** **EPNQKLYNVE** **ATSYALLALL** **ARKDYDTTPP**  
251 **VVRWLNEQR**Y YGGGYGSTQA TFMVFQALAQ YQKDVDPHKE LNLDVSIQLP  
301 SRN

Unformatted sequence string: [303 residues](#) (for pasting into other applications).

Sort peptides by      Residue Number      Increasing Mass      Decreasing Mass

Show predicted peptides also

| Query              | Start - End | Observed  | Mr(expt)  | Mr(calc)  | ppm   | M | Score | Peptide                            |
|--------------------|-------------|-----------|-----------|-----------|-------|---|-------|------------------------------------|
| <a href="#">31</a> | 41 - 49     | 1143.6165 | 1142.6092 | 1142.6407 | -27.6 | 1 |       | <b>K.RQESLELIR.K</b>               |
| <a href="#">14</a> | 42 - 49     | 987.5186  | 986.5113  | 986.5396  | -28.7 | 0 |       | <b>R.QESLELIR.K</b>                |
| <a href="#">38</a> | 50 - 59     | 1211.6163 | 1210.6090 | 1210.6458 | -30.4 | 1 |       | <b>R.KGYTQQLAFR.Q</b>              |
| <a href="#">39</a> | 50 - 59     | 1211.6163 | 1210.6091 | 1210.6458 | -30.4 | 1 |       | <b>R.KGYTQQLAFR.Q</b>              |
| <a href="#">24</a> | 51 - 59     | 1083.5225 | 1082.5152 | 1082.5509 | -33.0 | 0 | 14    | <b>K.GYTQQLAFR.Q</b>               |
| <a href="#">25</a> | 51 - 59     | 1083.5225 | 1082.5152 | 1082.5509 | -32.9 | 0 |       | <b>K.GYTQQLAFR.Q</b>               |
| <a href="#">75</a> | 62 - 83     | 2506.2144 | 2505.2071 | 2505.2692 | -24.8 | 0 |       | <b>K.SSAYAAFQYRPPSTWLTAYVVK.V</b>  |
| <a href="#">76</a> | 62 - 83     | 2506.2144 | 2505.2071 | 2505.2692 | -24.8 | 0 |       | <b>K.SSAYAAFQYRPPSTWLTAYVVK.V</b>  |
| <a href="#">77</a> | 111 - 133   | 2598.2195 | 2597.2122 | 2597.2697 | -22.1 | 0 |       | <b>K.QKPDGIFQEDGPVIHQEMIGGFR.D</b> |
| <a href="#">48</a> | 155 - 166   | 1361.6049 | 1360.5976 | 1360.6405 | -31.5 | 0 |       | <b>K.DICEAQVNSLGR.S</b>            |
| <a href="#">40</a> | 171 - 180   | 1221.5270 | 1220.5197 | 1220.5574 | -30.9 | 0 | 40    | <b>K.AGDFLENHYR.E</b>              |
| <a href="#">41</a> | 171 - 180   | 1221.5270 | 1220.5197 | 1220.5574 | -30.9 | 0 |       | <b>K.AGDFLENHYR.E</b>              |
| <a href="#">59</a> | 184 - 200   | 1790.9982 | 1789.9909 | 1790.0454 | -30.4 | 0 |       | <b>R.RPYTVAI AAYALALLGK.L</b>      |
| <a href="#">60</a> | 184 - 200   | 1790.9982 | 1789.9909 | 1790.0454 | -30.4 | 0 |       | <b>R.RPYTVAI AAYALALLGK.L</b>      |
| <a href="#">37</a> | 217 - 225   | 1200.5436 | 1199.5363 | 1199.5683 | -26.7 | 1 |       | <b>K.NRWEENQK.L</b>                |
| <a href="#">63</a> | 226 - 242   | 1880.9891 | 1879.9818 | 1880.0407 | -31.3 | 0 |       | <b>K.LYNVEATSYALLALLAR.K</b>       |
| <a href="#">64</a> | 226 - 242   | 1880.9891 | 1879.9819 | 1880.0407 | -31.3 | 0 | 80    | <b>K.LYNVEATSYALLALLAR.K</b>       |
| <a href="#">44</a> | 243 - 253   | 1290.6333 | 1289.6260 | 1289.6616 | -27.6 | 1 |       | <b>R.KDYDTTPPVVR.W</b>             |
| <a href="#">33</a> | 244 - 253   | 1162.5488 | 1161.5415 | 1161.5666 | -21.6 | 0 |       | <b>K.DYDTTPPVVR.W</b>              |
| <a href="#">2</a>  | 254 - 259   | 845.4012  | 844.3939  | 844.4191  | -29.8 | 0 |       | <b>R.WLNEQR.Y</b>                  |

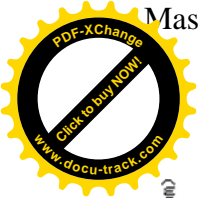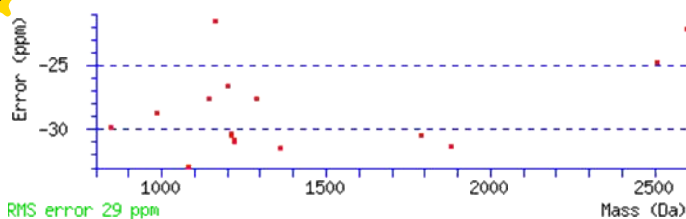

```

ID      Q693V9_BOVIN                      Unreviewed;          303 AA.
AC      Q693V9;
DT      13-SEP-2004, integrated into UniProtKB/TrEMBL.
DT      13-SEP-2004, sequence version 1.
DT      26-FEB-2020, entry version 71.
DE      SubName: Full=Complement component 3d {ECO:0000313|EMBL:ACG50173.1};
DE      SubName: Full=Complement component C3d {ECO:0000313|EMBL:AAT76518.1};
DE      Flags: Fragment;
OS      Bos taurus (Bovine).
OC      Eukaryota; Metazoa; Chordata; Craniata; Vertebrata; Euteleostomi; Mammalia;
OC      Eutheria; Laurasiatheria; Artiodactyla; Ruminantia; Pecora; Bovidae;
OC      Bovinae; Bos.
OX      NCBI_TaxID=9913 {ECO:0000313|EMBL:AAT76518.1};
RN      [1] {ECO:0000313|EMBL:AAT76518.1}
RP      NUCLEOTIDE SEQUENCE.
RA      Collada C., Casado R., Gomez L., Allona I., Aragoncillo C.;
RL      Submitted (MAY-2004) to the EMBL/GenBank/DDBJ databases.
RN      [2] {ECO:0000313|EMBL:AAT76518.1}
RP      NUCLEOTIDE SEQUENCE.
RX      PubMed=16904753; DOI=10.1016/j.vetimm.2006.07.005;
RA      Firth M.A., Moore D.P., Pei Y., Shewen P.E., Lo R.Y.C., Yoo D.,
RA      Hodgins D.C.;
RT      "Cloning of a gene fragment encoding bovine complement component C3d with
RT      expression and characterization of derived fusion proteins.";
RL      Vet. Immunol. Immunopathol. 114:61-71(2006).
RN      [3] {ECO:0000313|EMBL:ACG50173.1}
RP      NUCLEOTIDE SEQUENCE.
RC      TISSUE=Liver {ECO:0000313|EMBL:ACG50173.1};
RA      Liu D., Niu Z.X.;
RT      "Cloning and structural analysis of simmental cattle complement component
RT      3d gene.";
RL      Submitted (JUL-2008) to the EMBL/GenBank/DDBJ databases.
CC      -----
CC      Copyrighted by the UniProt Consortium, see https://www.uniprot.org/terms
CC      Distributed under the Creative Commons Attribution (CC BY 4.0) License
CC      -----
DR      EMBL; AY630404; AAT76518.1; -; mRNA.
DR      EMBL; EU868825; ACG50173.1; -; mRNA.
DR      SMR; Q693V9; -.
DR      eggNOG; KOG1366; Eukaryota.
DR      eggNOG; ENOG410XRED; LUCA.
DR      HOGENOM; CLU_001634_4_0_1; -.
DR      GO; GO:0005615; C:extracellular space; IEA:InterPro.
DR      GO; GO:0006956; P:complement activation; IEA:InterPro.
DR      InterPro; IPR011626; Alpha-macroglobulin_TED.
DR      InterPro; IPR035711; Complement_C3-like.
DR      InterPro; IPR019742; MacrogloblnA2_CS.
DR      InterPro; IPR008930; Terpenoid_cyclase/PrenylTrfase.
DR      PANTHER; PTHR11412:SF81; PTHR11412:SF81; 1.
DR      Pfam; PF07678; TED_complement; 1.
DR      SUPFAM; SSF48239; SSF48239; 1.
DR      PROSITE; PS00477; ALPHA_2_MACROGLOBULIN; 1.
PE      2: Evidence at transcript level;
FT      DOMAIN                2..281
FT                               /note="TED_complement"
FT                               /evidence="ECO:0000259|Pfam:PF07678"
FT      NON_TER                1
FT                               /evidence="ECO:0000313|EMBL:AAT76518.1"
FT      NON_TER                303
FT                               /evidence="ECO:0000313|EMBL:AAT76518.1"
SQ      SEQUENCE   303 AA;  34443 MW;  2F3A15020CEA3797 CRC64;
      HLIQTPSGCG EQNMIGMTPT VIAVHYLDST DQWEKFGLEK RQESLELIRK GYTQQLAFRQ
      KSSAYAAFQY RPPSTWLTAY VVKVFALAAN LIAIDSKDLC ETVKWLILEK QKPDGIFQED
      GPVIHQEMIG GFRDRTREKDV SLTAFVLIAL HEAKDICEAQ VNSLGRSIAK AGDFLENHYR
      ELRRPYTVAI AAYALALLGK LEGDRLTKFL NTAKEKNRWE EPNQKLYNVE ATSYALLALL
      ARKDYDTTPP VVRWLNEQRY YGGYGSTQA TFMVFQALAQ YQKDVDPHKE LNLDSVSIQLP
      SRN

```

//

Mascot: <http://www.matrixscience.com/>
