# Supplementary material for: Alpha-2-Macroglobulin as a New Promising Biomarker Improving the Diagnostic Sensitivity of Bovine Paratuberculosis
Source: Frontiers journal article supplement (doi:10.3389/fvets.2021.637716), 2021-03-05
Supplement: Data_Sheet_1.zip [file Data_Sheet_1.zip]

User :  
Email :  
Search title : BAEDW\2020\_3\_5\2020\_3\_5\MSMS 14\N11  
Database : Uniprot\_bovine bovine\_20200316 (134392 sequences; 76244912 residues)  
Timestamp : 31 Mar 2020 at 01:08:40 GMT  
Warning : A Peptide summary report will usually give a much clearer picture of MS/MS search results.  
Top Score : 90 for R9QSM8, Alpha-2-macroglobulin OS=Bos taurus OX=9913 GN=A2M PE=2 SV=1

Mascot Score Histogram

Protein score is -10\*Log(P), where P is the probability that the observed match is a random event.  
Protein scores greater than 64 are significant (p<0.05).  
Protein scores are derived from ions scores as a non-probabilistic basis for ranking protein hits.

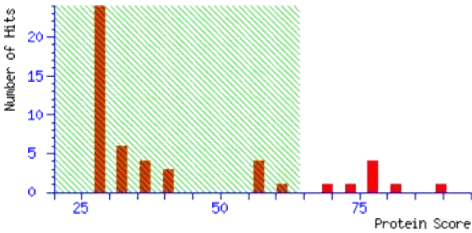

Protein Summary Report

Format As

Protein Summary (deprecated)

[Help](#)

Significance threshold p<

0.05

Max. number of hits

30

Preferred taxonomy

All entries

Re-Search All

Search Unmatched

Index

| Accession                      | Mass   | Score | Description                                                                                         |
|--------------------------------|--------|-------|-----------------------------------------------------------------------------------------------------|
| 1. <a href="#">R9QSM8</a>      | 134613 | 90    | Alpha-2-macroglobulin OS=Bos taurus OX=9913 GN=A2M PE=2 SV=1                                        |
| 2. <a href="#">K4JF16</a>      | 102208 | 83    | Alpha-2-macroglobulin variant 23 OS=Bos taurus OX=9913 GN=A2M PE=2 SV=1                             |
| 3. <a href="#">K4JR88</a>      | 78030  | 78    | Alpha-2-macroglobulin variant 22 OS=Bos taurus OX=9913 GN=A2M PE=2 SV=1                             |
| 4. <a href="#">A0A4W2E185</a>  | 169075 | 78    | Alpha-2-macroglobulin OS=Bos indicus x Bos taurus OX=30522 GN=A2M PE=4 SV=1                         |
| 5. <a href="#">Q7STH1</a>      | 168953 | 78    | Alpha-2-macroglobulin OS=Bos taurus OX=9913 GN=A2M PE=1 SV=2                                        |
| 6. <a href="#">A0A4W2CTC9</a>  | 169552 | 78    | Alpha-2-macroglobulin OS=Bos indicus x Bos taurus OX=30522 GN=A2M PE=4 SV=1                         |
| 7. <a href="#">K4JBR5</a>      | 116087 | 75    | Alpha-2-macroglobulin variant 1 OS=Bos taurus OX=9913 GN=A2M PE=2 SV=1                              |
| 8. <a href="#">K4JDT2</a>      | 99307  | 68    | Alpha-2-macroglobulin variant 20 OS=Bos taurus OX=9913 GN=A2M PE=2 SV=1                             |
| 9. <a href="#">A0A4W2FQH1</a>  | 164938 | 59    | Alpha-2-macroglobulin OS=Bos indicus x Bos taurus OX=30522 GN=A2M PE=4 SV=1                         |
| 10. <a href="#">A0A4W2FQJ3</a> | 166227 | 59    | Alpha-2-macroglobulin OS=Bos indicus x Bos taurus OX=30522 GN=A2M PE=4 SV=1                         |
| 11. <a href="#">A0A4W2FCM6</a> | 168925 | 58    | Alpha-2-macroglobulin OS=Bos indicus x Bos taurus OX=30522 GN=A2M PE=4 SV=1                         |
| 12. <a href="#">A0A4W2HMY5</a> | 168978 | 58    | Alpha-2-macroglobulin OS=Bos indicus x Bos taurus OX=30522 GN=A2M PE=4 SV=1                         |
| 13. <a href="#">A0A4W2HM51</a> | 168906 | 58    | Alpha-2-macroglobulin OS=Bos indicus x Bos taurus OX=30522 GN=A2M PE=4 SV=1                         |
| 14. <a href="#">A0A4W2BQ12</a> | 48807  | 41    | Tripartite motif containing 77 OS=Bos indicus x Bos taurus OX=30522 GN=TRIM77 PE=4 SV=1             |
| 15. <a href="#">A0A4W2FVS5</a> | 48837  | 41    | Uncharacterized protein OS=Bos indicus x Bos taurus OX=30522 GN=LOC113885841 PE=4 SV=1              |
| 16. <a href="#">A0A1L7BC46</a> | 55660  | 39    | NS5A (Fragment) OS=Bovine viral diarrhea virus OX=11099 PE=4 SV=1                                   |
| 17. <a href="#">A0A4W2FCR6</a> | 52833  | 36    | Reverse transcriptase domain-containing protein OS=Bos indicus x Bos taurus OX=30522 PE=4 SV=1      |
| 18. <a href="#">A0A4W2HM23</a> | 53406  | 35    | Glucosaminyl (N-acetyl) transferase 4 OS=Bos indicus x Bos taurus OX=30522 GN=GCNT4 PE=4 SV=1       |
| 19. <a href="#">A0A1L7BC66</a> | 56212  | 35    | NS5A (Fragment) OS=Bovine viral diarrhea virus OX=11099 PE=4 SV=1                                   |
| 20. <a href="#">A0A3Q1MD56</a> | 430029 | 34    | Lysosomal-trafficcking regulator OS=Bos taurus OX=9913 GN=LYST PE=4 SV=1                            |
| 21. <a href="#">A0A4W2E9U7</a> | 76824  | 34    | Nibrin OS=Bos indicus x Bos taurus OX=30522 GN=NBIN PE=4 SV=1                                       |
| 22. <a href="#">E1BNC9</a>     | 124764 | 32    | Ankyrin 3 OS=Bos taurus OX=9913 GN=ANK3 PE=4 SV=3                                                   |
| 23. <a href="#">G8JVK3</a>     | 11943  | 32    | Glutaredoxin domain-containing protein OS=Bos taurus OX=9913 PE=4 SV=1                              |
| 24. <a href="#">A0A4W2C8T2</a> | 11943  | 32    | Glutaredoxin domain-containing protein OS=Bos indicus x Bos taurus OX=30522 PE=4 SV=1               |
| 25. <a href="#">A0A3Q1MUB2</a> | 54957  | 31    | Glucosaminyl (N-acetyl) transferase 4 OS=Bos taurus OX=9913 GN=GCNT4 PE=4 SV=1                      |
| 26. <a href="#">A0A3Q1M1F6</a> | 143195 | 30    | Myomesin 3 OS=Bos taurus OX=9913 GN=MYOM3 PE=4 SV=1                                                 |
| 27. <a href="#">Q9QAQ5</a>     | 12971  | 30    | Non-structural protein of 12.7 kDa OS=Bovine coronavirus (strain OK-0514) OX=231432 GN=5a PE=3 SV=1 |
| 28. <a href="#">Q6YPB4</a>     | 16612  | 30    | NOSIC domain-containing protein (Fragment) OS=Bos taurus OX=9913 PE=2 SV=1                          |
| 29. <a href="#">D8V071</a>     | 35943  | 30    | Phosphoprotein OS=Tibrogargan virus (strain CS132) OX=1559361 GN=P PE=3 SV=1                        |
| 30. <a href="#">A0A4W2DGE8</a> | 25670  | 29    | Peptidylprolyl isomerase OS=Bos indicus x Bos taurus OX=30522 GN=FKBP11 PE=4 SV=1                   |

Results List

| 1.                                                           | <a href="#">R9QSM8</a> | Mass: 134613 | Score: 90 | Expect: 0.00014 | Matches: 20                              |
|--------------------------------------------------------------|------------------------|--------------|-----------|-----------------|------------------------------------------|
| Alpha-2-macroglobulin OS=Bos taurus OX=9913 GN=A2M PE=2 SV=1 |                        |              |           |                 |                                          |
| Observed                                                     | Mr (expnt)             | Mr (calc)    | ppm       | Start           | End Miss Ions Peptide                    |
| 996.5488                                                     | 995.5415               | 995.4607     | 81.2      | 1111 - 1118     | 1 --- K.QKSNGCFFR.S                      |
| 1131.6523                                                    | 1130.6450              | 1130.6295    | 13.7      | 1119 - 1129     | 0 --- R.STGTLLNNAIK.G                    |
| 1250.6191                                                    | 1249.6118              | 1249.6667    | -43.88    | 350 - 360       | 0 --- K.LSFVTVDSNLR.R                    |
| 1250.6191                                                    | 1249.6119              | 1249.6667    | -43.85    | 350 - 360       | 0 --- K.LSFVTVDSNLR.R                    |
| 1287.6302                                                    | 1286.6229              | 1286.6830    | -46.71    | 777 - 789       | 0 --- R.DTGLGLSPTASLR.V                  |
| 1302.6307                                                    | 1301.6234              | 1301.6762    | -40.52    | 587 - 598       | 0 --- R.VTASFPQSLCALR.A                  |
| 1421.6768                                                    | 1420.6695              | 1420.7350    | -46.15    | 455 - 466       | 0 14 R.SNSFVYLEPLPR.E                    |
| 1421.6768                                                    | 1420.6695              | 1420.7350    | -46.12    | 455 - 466       | 0 --- R.SNSFVYLEPLPR.E                   |
| 1479.7271                                                    | 1478.7198              | 1478.6422    | 52.5      | 667 - 678       | 0 --- K.DMYSFLQDMGLK.A + 2 Oxidation (M) |
| 1491.6775                                                    | 1490.6702              | 1490.7340    | -42.81    | 82 - 93         | 0 --- K.DLFHCVSFTLPR.S                   |
| 1523.7185                                                    | 1522.7112              | 1522.7814    | -46.06    | 983 - 997       | 0 --- R.ASFSVLGDILGSAMR.N                |
| 1707.8094                                                    | 1706.8021              | 1706.8913    | -52.25    | 94 - 108        | 0 --- R.SPTSQEVFMPLTIQVK.G               |
| 1900.9595                                                    | 1899.9522              | 1900.0306    | -41.25    | 540 - 557       | 0 13 R.LLIYAILPDGEVVGDSAR.Y              |
| 1900.9595                                                    | 1899.9522              | 1900.0306    | -41.23    | 540 - 557       | 0 --- R.LLIYAILPDGEVVGDSAR.Y             |
| 1991.8297                                                    | 1990.8224              | 1990.8909    | -34.39    | 718 - 734       | 0 --- R.DFVHDDTSEPPTETVR.K               |

|                                                                                                                                                                                                                                                                                                                                                                                                                                                                                                                                                                                                                                   |           |           |        |     |   |     |   |     |                                 |
|-----------------------------------------------------------------------------------------------------------------------------------------------------------------------------------------------------------------------------------------------------------------------------------------------------------------------------------------------------------------------------------------------------------------------------------------------------------------------------------------------------------------------------------------------------------------------------------------------------------------------------------|-----------|-----------|--------|-----|---|-----|---|-----|---------------------------------|
| 2001.9189                                                                                                                                                                                                                                                                                                                                                                                                                                                                                                                                                                                                                         | 2000.9116 | 2000.9844 | -36.36 | 210 | - | 228 | 0 | --- | K.GSGGTAEHPTVEEFVLPK.F          |
| 2012.9465                                                                                                                                                                                                                                                                                                                                                                                                                                                                                                                                                                                                                         | 2011.9392 | 2012.0228 | -41.54 | 568 | - | 586 | 0 | --- | K.VGLNFSPGQSFPASQAHLR.V         |
| 2012.9465                                                                                                                                                                                                                                                                                                                                                                                                                                                                                                                                                                                                                         | 2011.9393 | 2012.0228 | -41.53 | 568 | - | 586 | 0 | --- | K.VGLNFSPGQSFPASQAHLR.V         |
| 2073.0088                                                                                                                                                                                                                                                                                                                                                                                                                                                                                                                                                                                                                         | 2072.0015 | 2072.0805 | -38.12 | 790 | - | 806 | 0 | --- | R.VFQPPFFVELTMPYSVIR.G          |
| 2927.5508                                                                                                                                                                                                                                                                                                                                                                                                                                                                                                                                                                                                                         | 2926.5435 | 2926.5837 | -13.74 | 599 | - | 625 | 0 | --- | R.AVDQSVLLMRPEAELSAATVYNLLPVK.D |
| No match to: 842.4690, 848.4879, 850.0154, 850.4973, 853.4743, 853.4743, 861.0195, 864.5118, 865.9869, 868.5078, 870.5034, 876.9944, 881.9677, 882.5228, 882.5228, 892.9686, 951.5814, 953.4899, 1017.6209, 1017.6209, 1019.6330, 1033.6514, 1045.5168, 1051.6565, 1051.6565, 1136.6420, 1147.6807, 1151.6740, 1165.6849, 1165.6849, 1300.7900, 1316.8218, 1334.8221, 1334.8221, 1356.6021, 1448.8531, 1454.7075, 1475.6875, 1518.6587, 1552.7145, 1559.7947, 1567.6738, 1617.9915, 1617.9915, 1732.0206, 2015.1936, 2044.9634, 2193.0256, 2211.0200, 2230.1453, 2233.0505, 2239.0674, 2283.0967, 2284.0908, 2305.0867, 3337.7156 |           |           |        |     |   |     |   |     |                                 |

2. [K4JF16](#) Mass: 102208 Score: 83 Expect: 0.00071 Matches: 17

| Alpha-2-macroglobulin variant 23 OS=Bos taurus OX=9913 GN=A2M PE=2 SV=1                                                                                                                                                                                                                                                                                                                                                                                                                                                                                                                                                                                |           |           |        |       |     |      |      |         |                                    |
|--------------------------------------------------------------------------------------------------------------------------------------------------------------------------------------------------------------------------------------------------------------------------------------------------------------------------------------------------------------------------------------------------------------------------------------------------------------------------------------------------------------------------------------------------------------------------------------------------------------------------------------------------------|-----------|-----------|--------|-------|-----|------|------|---------|------------------------------------|
| Observed                                                                                                                                                                                                                                                                                                                                                                                                                                                                                                                                                                                                                                               | Mr(expt)  | Mr(calc)  | ppm    | Start | End | Miss | Ions | Peptide |                                    |
| 1250.6191                                                                                                                                                                                                                                                                                                                                                                                                                                                                                                                                                                                                                                              | 1249.6118 | 1249.6667 | -43.88 | 350   | -   | 360  | 0    | ---     | K.LSFVTVDNSNLR.R                   |
| 1250.6191                                                                                                                                                                                                                                                                                                                                                                                                                                                                                                                                                                                                                                              | 1249.6119 | 1249.6667 | -43.85 | 350   | -   | 360  | 0    | ---     | K.LSFVTVDNSNLR.R                   |
| 1287.6302                                                                                                                                                                                                                                                                                                                                                                                                                                                                                                                                                                                                                                              | 1286.6229 | 1286.6830 | -46.71 | 777   | -   | 789  | 0    | ---     | R.DTGLGLSPTASLR.V                  |
| 1302.6307                                                                                                                                                                                                                                                                                                                                                                                                                                                                                                                                                                                                                                              | 1301.6234 | 1301.6762 | -40.52 | 587   | -   | 598  | 0    | ---     | R.VTASPQSLCALR.A                   |
| 1421.6768                                                                                                                                                                                                                                                                                                                                                                                                                                                                                                                                                                                                                                              | 1420.6695 | 1420.7350 | -46.15 | 455   | -   | 466  | 0    | 14      | R.SNSFVYLEPLPR.E                   |
| 1421.6768                                                                                                                                                                                                                                                                                                                                                                                                                                                                                                                                                                                                                                              | 1420.6695 | 1420.7350 | -46.12 | 455   | -   | 466  | 0    | ---     | R.SNSFVYLEPLPR.E                   |
| 1479.7271                                                                                                                                                                                                                                                                                                                                                                                                                                                                                                                                                                                                                                              | 1478.7198 | 1478.6422 | 52.5   | 667   | -   | 678  | 0    | ---     | K.DMYSFLQDMGLK.A + 2 Oxidation (M) |
| 1491.6775                                                                                                                                                                                                                                                                                                                                                                                                                                                                                                                                                                                                                                              | 1490.6702 | 1490.7340 | -42.81 | 82    | -   | 93   | 0    | ---     | K.DLFHCVSFTLPR.S                   |
| 1707.8094                                                                                                                                                                                                                                                                                                                                                                                                                                                                                                                                                                                                                                              | 1706.8021 | 1706.8913 | -52.25 | 94    | -   | 108  | 0    | ---     | R.SPTSQEVFMFLTIQVK.G               |
| 1900.9595                                                                                                                                                                                                                                                                                                                                                                                                                                                                                                                                                                                                                                              | 1899.9522 | 1900.0306 | -41.25 | 540   | -   | 557  | 0    | 13      | R.LLIYAILPDGEVVGDSAR.Y             |
| 1900.9595                                                                                                                                                                                                                                                                                                                                                                                                                                                                                                                                                                                                                                              | 1899.9522 | 1900.0306 | -41.23 | 540   | -   | 557  | 0    | ---     | R.LLIYAILPDGEVVGDSAR.Y             |
| 1991.8297                                                                                                                                                                                                                                                                                                                                                                                                                                                                                                                                                                                                                                              | 1990.8224 | 1990.8909 | -34.39 | 718   | -   | 734  | 0    | ---     | R.DFVHFDITSEPPETVTR.K              |
| 2001.9189                                                                                                                                                                                                                                                                                                                                                                                                                                                                                                                                                                                                                                              | 2000.9116 | 2000.9844 | -36.36 | 210   | -   | 228  | 0    | ---     | K.GSGGTAEHPTVEEFVLPK.F             |
| 2012.9465                                                                                                                                                                                                                                                                                                                                                                                                                                                                                                                                                                                                                                              | 2011.9392 | 2012.0228 | -41.54 | 568   | -   | 586  | 0    | ---     | K.VGLNFSPGQSFPASQAHLR.V            |
| 2012.9465                                                                                                                                                                                                                                                                                                                                                                                                                                                                                                                                                                                                                                              | 2011.9393 | 2012.0228 | -41.53 | 568   | -   | 586  | 0    | ---     | K.VGLNFSPGQSFPASQAHLR.V            |
| 2073.0088                                                                                                                                                                                                                                                                                                                                                                                                                                                                                                                                                                                                                                              | 2072.0015 | 2072.0805 | -38.12 | 790   | -   | 806  | 0    | ---     | R.VFQPPFFVELTMPYSVIR.G             |
| 2927.5508                                                                                                                                                                                                                                                                                                                                                                                                                                                                                                                                                                                                                                              | 2926.5435 | 2926.5837 | -13.74 | 599   | -   | 625  | 0    | ---     | R.AVDQSVLLMRPEAELSAATVYNLLPVK.D    |
| No match to: 842.4690, 848.4879, 850.0154, 850.4973, 853.4743, 853.4743, 861.0195, 864.5118, 865.9869, 868.5078, 870.5034, 876.9944, 881.9677, 882.5228, 882.5228, 892.9686, 951.5814, 953.4899, 996.5488, 1017.6209, 1017.6209, 1019.6330, 1033.6514, 1045.5168, 1051.6565, 1051.6565, 1131.6523, 1136.6420, 1147.6807, 1151.6740, 1165.6849, 1165.6849, 1300.7900, 1316.8218, 1334.8221, 1334.8221, 1356.6021, 1448.8531, 1454.7075, 1475.6875, 1518.6587, 1552.7145, 1559.7947, 1567.6738, 1617.9915, 1617.9915, 1732.0206, 2015.1936, 2044.9634, 2193.0256, 2211.0200, 2230.1453, 2233.0505, 2239.0674, 2283.0967, 2284.0908, 2305.0867, 3337.7156 |           |           |        |       |     |      |      |         |                                    |

3. [K4JR88](#) Mass: 78030 Score: 78 Expect: 0.0021 Matches: 15

| Alpha-2-macroglobulin variant 22 OS=Bos taurus OX=9913 GN=A2M PE=2 SV=1                                                                                                                                                                                                                                                                                                                                                                                                                                                                                                                                                                                                                 |           |           |        |       |     |      |      |         |                                    |
|-----------------------------------------------------------------------------------------------------------------------------------------------------------------------------------------------------------------------------------------------------------------------------------------------------------------------------------------------------------------------------------------------------------------------------------------------------------------------------------------------------------------------------------------------------------------------------------------------------------------------------------------------------------------------------------------|-----------|-----------|--------|-------|-----|------|------|---------|------------------------------------|
| Observed                                                                                                                                                                                                                                                                                                                                                                                                                                                                                                                                                                                                                                                                                | Mr(expt)  | Mr(calc)  | ppm    | Start | End | Miss | Ions | Peptide |                                    |
| 1250.6191                                                                                                                                                                                                                                                                                                                                                                                                                                                                                                                                                                                                                                                                               | 1249.6118 | 1249.6667 | -43.88 | 350   | -   | 360  | 0    | ---     | K.LSFVTVDNSNLR.R                   |
| 1250.6191                                                                                                                                                                                                                                                                                                                                                                                                                                                                                                                                                                                                                                                                               | 1249.6119 | 1249.6667 | -43.85 | 350   | -   | 360  | 0    | ---     | K.LSFVTVDNSNLR.R                   |
| 1287.6302                                                                                                                                                                                                                                                                                                                                                                                                                                                                                                                                                                                                                                                                               | 1286.6229 | 1286.6983 | -58.57 | 473   | -   | 483  | 0    | ---     | K.TQTQVAHYVLK.G                    |
| 1302.6307                                                                                                                                                                                                                                                                                                                                                                                                                                                                                                                                                                                                                                                                               | 1301.6234 | 1301.6762 | -40.52 | 587   | -   | 598  | 0    | ---     | R.VTASPQSLCALR.A                   |
| 1421.6768                                                                                                                                                                                                                                                                                                                                                                                                                                                                                                                                                                                                                                                                               | 1420.6695 | 1420.7350 | -46.15 | 455   | -   | 466  | 0    | 14      | R.SNSFVYLEPLPR.E                   |
| 1421.6768                                                                                                                                                                                                                                                                                                                                                                                                                                                                                                                                                                                                                                                                               | 1420.6695 | 1420.7350 | -46.12 | 455   | -   | 466  | 0    | ---     | R.SNSFVYLEPLPR.E                   |
| 1479.7271                                                                                                                                                                                                                                                                                                                                                                                                                                                                                                                                                                                                                                                                               | 1478.7198 | 1478.6422 | 52.5   | 667   | -   | 678  | 0    | ---     | K.DMYSFLQDMGLK.A + 2 Oxidation (M) |
| 1491.6775                                                                                                                                                                                                                                                                                                                                                                                                                                                                                                                                                                                                                                                                               | 1490.6702 | 1490.7340 | -42.81 | 82    | -   | 93   | 0    | ---     | K.DLFHCVSFTLPR.S                   |
| 1707.8094                                                                                                                                                                                                                                                                                                                                                                                                                                                                                                                                                                                                                                                                               | 1706.8021 | 1706.8913 | -52.25 | 94    | -   | 108  | 0    | ---     | R.SPTSQEVFMFLTIQVK.G               |
| 1900.9595                                                                                                                                                                                                                                                                                                                                                                                                                                                                                                                                                                                                                                                                               | 1899.9522 | 1900.0306 | -41.25 | 540   | -   | 557  | 0    | 13      | R.LLIYAILPDGEVVGDSAR.Y             |
| 1900.9595                                                                                                                                                                                                                                                                                                                                                                                                                                                                                                                                                                                                                                                                               | 1899.9522 | 1900.0306 | -41.23 | 540   | -   | 557  | 0    | ---     | R.LLIYAILPDGEVVGDSAR.Y             |
| 2001.9189                                                                                                                                                                                                                                                                                                                                                                                                                                                                                                                                                                                                                                                                               | 2000.9116 | 2000.9844 | -36.36 | 210   | -   | 228  | 0    | ---     | K.GSGGTAEHPTVEEFVLPK.F             |
| 2012.9465                                                                                                                                                                                                                                                                                                                                                                                                                                                                                                                                                                                                                                                                               | 2011.9392 | 2012.0228 | -41.54 | 568   | -   | 586  | 0    | ---     | K.VGLNFSPGQSFPASQAHLR.V            |
| 2012.9465                                                                                                                                                                                                                                                                                                                                                                                                                                                                                                                                                                                                                                                                               | 2011.9393 | 2012.0228 | -41.53 | 568   | -   | 586  | 0    | ---     | K.VGLNFSPGQSFPASQAHLR.V            |
| 2927.5508                                                                                                                                                                                                                                                                                                                                                                                                                                                                                                                                                                                                                                                                               | 2926.5435 | 2926.5837 | -13.74 | 599   | -   | 625  | 0    | ---     | R.AVDQSVLLMRPEAELSAATVYNLLPVK.D    |
| No match to: 842.4690, 848.4879, 850.0154, 850.4973, 853.4743, 853.4743, 861.0195, 864.5118, 865.9869, 868.5078, 870.5034, 876.9944, 881.9677, 882.5228, 882.5228, 892.9686, 951.5814, 953.4899, 996.5488, 1017.6209, 1017.6209, 1019.6330, 1033.6514, 1045.5168, 1051.6565, 1051.6565, 1131.6523, 1136.6420, 1147.6807, 1151.6740, 1165.6849, 1165.6849, 1300.7900, 1316.8218, 1334.8221, 1334.8221, 1356.6021, 1448.8531, 1454.7075, 1475.6875, 1518.6587, 1523.7185, 1552.7145, 1559.7947, 1567.6738, 1617.9915, 1617.9915, 1732.0206, 1991.8297, 2015.1936, 2044.9634, 2073.0088, 2193.0256, 2211.0200, 2230.1453, 2233.0505, 2239.0674, 2283.0967, 2284.0908, 2305.0867, 3337.7156 |           |           |        |       |     |      |      |         |                                    |

4. [A0A4W2E185](#) Mass: 169075 Score: 78 Expect: 0.0022 Matches: 20

| Alpha-2-macroglobulin OS=Bos indicus x Bos taurus OX=30522 GN=A2M PE=4 SV=1                                                                                                                                                                                                                                                                                                                                                                                                                                                                                                                                                       |           |           |        |       |     |      |      |         |                                    |
|-----------------------------------------------------------------------------------------------------------------------------------------------------------------------------------------------------------------------------------------------------------------------------------------------------------------------------------------------------------------------------------------------------------------------------------------------------------------------------------------------------------------------------------------------------------------------------------------------------------------------------------|-----------|-----------|--------|-------|-----|------|------|---------|------------------------------------|
| Observed                                                                                                                                                                                                                                                                                                                                                                                                                                                                                                                                                                                                                          | Mr(expt)  | Mr(calc)  | ppm    | Start | End | Miss | Ions | Peptide |                                    |
| 996.5488                                                                                                                                                                                                                                                                                                                                                                                                                                                                                                                                                                                                                          | 995.5415  | 995.4607  | 81.2   | 1111  | -   | 1118 | 1    | ---     | K.QKSNCGCFR.S                      |
| 1131.6523                                                                                                                                                                                                                                                                                                                                                                                                                                                                                                                                                                                                                         | 1130.6450 | 1130.6295 | 13.7   | 1119  | -   | 1129 | 0    | ---     | R.STGTLLNNAIK.G                    |
| 1250.6191                                                                                                                                                                                                                                                                                                                                                                                                                                                                                                                                                                                                                         | 1249.6118 | 1249.6667 | -43.88 | 350   | -   | 360  | 0    | ---     | K.LSFVTVDNSNLR.R                   |
| 1250.6191                                                                                                                                                                                                                                                                                                                                                                                                                                                                                                                                                                                                                         | 1249.6119 | 1249.6667 | -43.85 | 350   | -   | 360  | 0    | ---     | K.LSFVTVDNSNLR.R                   |
| 1287.6302                                                                                                                                                                                                                                                                                                                                                                                                                                                                                                                                                                                                                         | 1286.6229 | 1286.6830 | -46.71 | 777   | -   | 789  | 0    | ---     | R.DTGLGLSPTASLR.V                  |
| 1302.6307                                                                                                                                                                                                                                                                                                                                                                                                                                                                                                                                                                                                                         | 1301.6234 | 1301.6762 | -40.52 | 587   | -   | 598  | 0    | ---     | R.VTASPQSLCALR.A                   |
| 1421.6768                                                                                                                                                                                                                                                                                                                                                                                                                                                                                                                                                                                                                         | 1420.6695 | 1420.7350 | -46.15 | 455   | -   | 466  | 0    | 14      | R.SNSFVYLEPLPR.E                   |
| 1421.6768                                                                                                                                                                                                                                                                                                                                                                                                                                                                                                                                                                                                                         | 1420.6695 | 1420.7350 | -46.12 | 455   | -   | 466  | 0    | ---     | R.SNSFVYLEPLPR.E                   |
| 1479.7271                                                                                                                                                                                                                                                                                                                                                                                                                                                                                                                                                                                                                         | 1478.7198 | 1478.6422 | 52.5   | 667   | -   | 678  | 0    | ---     | K.DMYSFLQDMGLK.A + 2 Oxidation (M) |
| 1491.6775                                                                                                                                                                                                                                                                                                                                                                                                                                                                                                                                                                                                                         | 1490.6702 | 1490.7340 | -42.81 | 82    | -   | 93   | 0    | ---     | K.DLFHCVSFTLPR.S                   |
| 1523.7185                                                                                                                                                                                                                                                                                                                                                                                                                                                                                                                                                                                                                         | 1522.7112 | 1522.7814 | -46.06 | 983   | -   | 997  | 0    | ---     | R.ASFVSLGDILGSAMR.N                |
| 1707.8094                                                                                                                                                                                                                                                                                                                                                                                                                                                                                                                                                                                                                         | 1706.8021 | 1706.8913 | -52.25 | 94    | -   | 108  | 0    | ---     | R.SPTSQEVFMFLTIQVK.G               |
| 1900.9595                                                                                                                                                                                                                                                                                                                                                                                                                                                                                                                                                                                                                         | 1899.9522 | 1900.0306 | -41.25 | 540   | -   | 557  | 0    | 13      | R.LLIYAILPDGEVVGDSAR.Y             |
| 1900.9595                                                                                                                                                                                                                                                                                                                                                                                                                                                                                                                                                                                                                         | 1899.9522 | 1900.0306 | -41.23 | 540   | -   | 557  | 0    | ---     | R.LLIYAILPDGEVVGDSAR.Y             |
| 1991.8297                                                                                                                                                                                                                                                                                                                                                                                                                                                                                                                                                                                                                         | 1990.8224 | 1990.8909 | -34.39 | 718   | -   | 734  | 0    | ---     | R.DFVHFDITSEPPETVTR.K              |
| 2001.9189                                                                                                                                                                                                                                                                                                                                                                                                                                                                                                                                                                                                                         | 2000.9116 | 2000.9844 | -36.36 | 210   | -   | 228  | 0    | ---     | K.GSGGTAEHPTVEEFVLPK.F             |
| 2012.9465                                                                                                                                                                                                                                                                                                                                                                                                                                                                                                                                                                                                                         | 2011.9392 | 2012.0228 | -41.54 | 568   | -   | 586  | 0    | ---     | K.VGLNFSPGQSFPASQAHLR.V            |
| 2012.9465                                                                                                                                                                                                                                                                                                                                                                                                                                                                                                                                                                                                                         | 2011.9393 | 2012.0228 | -41.53 | 568   | -   | 586  | 0    | ---     | K.VGLNFSPGQSFPASQAHLR.V            |
| 2073.0088                                                                                                                                                                                                                                                                                                                                                                                                                                                                                                                                                                                                                         | 2072.0015 | 2072.0805 | -38.12 | 790   | -   | 806  | 0    | ---     | R.VFQPPFFVELTMPYSVIR.G             |
| 2927.5508                                                                                                                                                                                                                                                                                                                                                                                                                                                                                                                                                                                                                         | 2926.5435 | 2926.5837 | -13.74 | 599   | -   | 625  | 0    | ---     | R.AVDQSVLLMRPEAELSAATVYNLLPVK.D    |
| No match to: 842.4690, 848.4879, 850.0154, 850.4973, 853.4743, 853.4743, 861.0195, 864.5118, 865.9869, 868.5078, 870.5034, 876.9944, 881.9677, 882.5228, 882.5228, 892.9686, 951.5814, 953.4899, 1017.6209, 1017.6209, 1019.6330, 1033.6514, 1045.5168, 1051.6565, 1051.6565, 1136.6420, 1147.6807, 1151.6740, 1165.6849, 1165.6849, 1300.7900, 1316.8218, 1334.8221, 1334.8221, 1356.6021, 1448.8531, 1454.7075, 1475.6875, 1518.6587, 1552.7145, 1559.7947, 1567.6738, 1617.9915, 1617.9915, 1732.0206, 2015.1936, 2044.9634, 2193.0256, 2211.0200, 2230.1453, 2233.0505, 2239.0674, 2283.0967, 2284.0908, 2305.0867, 3337.7156 |           |           |        |       |     |      |      |         |                                    |

5. [Q7SIHI](#) Mass: 168953 Score: 78 Expect: 0.0022 Matches: 20

Alpha-2-macroglobulin OS=Bos taurus OX=9913 GN=A2M PE=1 SV=2

| Observed                                                                                                                                                                                                                                                                                                                                                                                                                                                                                                                                                                                                                          | Mr(expt)  | Mr(calc)  | ppm    | Start | End  | Miss | Ions | Peptide                            |
|-----------------------------------------------------------------------------------------------------------------------------------------------------------------------------------------------------------------------------------------------------------------------------------------------------------------------------------------------------------------------------------------------------------------------------------------------------------------------------------------------------------------------------------------------------------------------------------------------------------------------------------|-----------|-----------|--------|-------|------|------|------|------------------------------------|
| 996.5488                                                                                                                                                                                                                                                                                                                                                                                                                                                                                                                                                                                                                          | 995.5415  | 995.4607  | 81.2   | 1111  | 1118 | 1    | ---  | K.QKSNGCFR.S                       |
| 1131.6523                                                                                                                                                                                                                                                                                                                                                                                                                                                                                                                                                                                                                         | 1130.6450 | 1130.6295 | 13.7   | 1119  | 1129 | 0    | ---  | R.STGTLNNAIK.G                     |
| 1250.6191                                                                                                                                                                                                                                                                                                                                                                                                                                                                                                                                                                                                                         | 1249.6118 | 1249.6667 | -43.88 | 350   | 360  | 0    | ---  | K.LSFVTVDNSLR.R                    |
| 1250.6191                                                                                                                                                                                                                                                                                                                                                                                                                                                                                                                                                                                                                         | 1249.6119 | 1249.6667 | -43.85 | 350   | 360  | 0    | ---  | K.LSFVTVDNSLR.R                    |
| 1287.6302                                                                                                                                                                                                                                                                                                                                                                                                                                                                                                                                                                                                                         | 1286.6229 | 1286.6830 | -46.71 | 777   | 789  | 0    | ---  | R.DTGLGLSPTASLR.V                  |
| 1302.6307                                                                                                                                                                                                                                                                                                                                                                                                                                                                                                                                                                                                                         | 1301.6234 | 1301.6762 | -40.52 | 587   | 598  | 0    | ---  | R.VTASPSQLCALR.A                   |
| 1421.6768                                                                                                                                                                                                                                                                                                                                                                                                                                                                                                                                                                                                                         | 1420.6695 | 1420.7350 | -46.15 | 455   | 466  | 0    | 14   | R.SNSFVYLEPLPR.E                   |
| 1421.6768                                                                                                                                                                                                                                                                                                                                                                                                                                                                                                                                                                                                                         | 1420.6695 | 1420.7350 | -46.12 | 455   | 466  | 0    | ---  | R.SNSFVYLEPLPR.E                   |
| 1479.7271                                                                                                                                                                                                                                                                                                                                                                                                                                                                                                                                                                                                                         | 1478.7198 | 1478.6422 | 52.5   | 667   | 678  | 0    | ---  | K.DMYSFLQDMGLK.A + 2 Oxidation (M) |
| 1491.6775                                                                                                                                                                                                                                                                                                                                                                                                                                                                                                                                                                                                                         | 1490.6702 | 1490.7340 | -42.81 | 82    | 93   | 0    | ---  | K.DLFHCVSFTLPR.S                   |
| 1523.7185                                                                                                                                                                                                                                                                                                                                                                                                                                                                                                                                                                                                                         | 1522.7112 | 1522.7814 | -46.06 | 983   | 997  | 0    | ---  | R.ASFVSLGDILGSAMR.N                |
| 1707.8094                                                                                                                                                                                                                                                                                                                                                                                                                                                                                                                                                                                                                         | 1706.8021 | 1706.8913 | -52.25 | 94    | 108  | 0    | ---  | R.SPTSQEVFMFLTIQVK.G               |
| 1900.9595                                                                                                                                                                                                                                                                                                                                                                                                                                                                                                                                                                                                                         | 1899.9522 | 1900.0306 | -41.25 | 540   | 557  | 0    | 13   | R.LLIYAILPDGEVVGDSAR.Y             |
| 1900.9595                                                                                                                                                                                                                                                                                                                                                                                                                                                                                                                                                                                                                         | 1899.9522 | 1900.0306 | -41.23 | 540   | 557  | 0    | ---  | R.LLIYAILPDGEVVGDSAR.Y             |
| 1991.8297                                                                                                                                                                                                                                                                                                                                                                                                                                                                                                                                                                                                                         | 1990.8224 | 1990.8909 | -34.39 | 718   | 734  | 0    | ---  | R.DFVHFDTTSEPTTETVR.K              |
| 2001.9189                                                                                                                                                                                                                                                                                                                                                                                                                                                                                                                                                                                                                         | 2000.9116 | 2000.9844 | -36.36 | 210   | 228  | 0    | ---  | K.GSGGTAEHPTTVEEFVLPK.F            |
| 2012.9465                                                                                                                                                                                                                                                                                                                                                                                                                                                                                                                                                                                                                         | 2011.9392 | 2012.0228 | -41.54 | 568   | 586  | 0    | ---  | K.VGLNFSFGQSFSPASQAHLR.V           |
| 2012.9465                                                                                                                                                                                                                                                                                                                                                                                                                                                                                                                                                                                                                         | 2011.9393 | 2012.0228 | -41.53 | 568   | 586  | 0    | ---  | K.VGLNFSFGQSFSPASQAHLR.V           |
| 2073.0088                                                                                                                                                                                                                                                                                                                                                                                                                                                                                                                                                                                                                         | 2072.0015 | 2072.0805 | -38.12 | 790   | 806  | 0    | ---  | R.VFQPFVVELTMPYSVIR.G              |
| 2927.5508                                                                                                                                                                                                                                                                                                                                                                                                                                                                                                                                                                                                                         | 2926.5435 | 2926.5837 | -13.74 | 599   | 625  | 0    | ---  | R.AVDQSVLLMRPEAELSAATVYNLLPVK.D    |
| No match to: 842.4690, 848.4879, 850.0154, 850.4973, 853.4743, 853.4743, 861.0195, 864.5118, 865.9869, 868.5078, 870.5034, 876.9944, 881.9677, 882.5228, 882.5228, 892.9686, 951.5814, 953.4899, 1017.6209, 1017.6209, 1019.6330, 1033.6514, 1045.5168, 1051.6565, 1051.6565, 1136.6420, 1147.6807, 1151.6740, 1165.6849, 1165.6849, 1300.7900, 1316.8218, 1334.8221, 1334.8221, 1356.6021, 1448.8531, 1454.7075, 1475.6875, 1518.6587, 1552.7145, 1559.7947, 1567.6738, 1617.9915, 1617.9915, 1732.0206, 2015.1936, 2044.9634, 2193.0256, 2211.0200, 2230.1453, 2233.0505, 2239.0674, 2283.0967, 2284.0908, 2305.0867, 3337.7156 |           |           |        |       |      |      |      |                                    |

6. [A0A4W2CTC9](#) Mass: 169552 Score: 78 Expect: 0.0023 Matches: 20

Alpha-2-macroglobulin OS=Bos indicus x Bos taurus OX=30522 GN=A2M PE=4 SV=1

| Observed                                                                                                                                                                                                                                                                                                                                                                                                                                                                                                                                                                                                                          | Mr(expt)  | Mr(calc)  | ppm    | Start | End  | Miss | Ions | Peptide                            |
|-----------------------------------------------------------------------------------------------------------------------------------------------------------------------------------------------------------------------------------------------------------------------------------------------------------------------------------------------------------------------------------------------------------------------------------------------------------------------------------------------------------------------------------------------------------------------------------------------------------------------------------|-----------|-----------|--------|-------|------|------|------|------------------------------------|
| 996.5488                                                                                                                                                                                                                                                                                                                                                                                                                                                                                                                                                                                                                          | 995.5415  | 995.4607  | 81.2   | 1111  | 1118 | 1    | ---  | K.QKSNGCFR.S                       |
| 1131.6523                                                                                                                                                                                                                                                                                                                                                                                                                                                                                                                                                                                                                         | 1130.6450 | 1130.6295 | 13.7   | 1119  | 1129 | 0    | ---  | R.STGTLNNAIK.G                     |
| 1250.6191                                                                                                                                                                                                                                                                                                                                                                                                                                                                                                                                                                                                                         | 1249.6118 | 1249.6667 | -43.88 | 350   | 360  | 0    | ---  | K.LSFVTVDNSLR.R                    |
| 1250.6191                                                                                                                                                                                                                                                                                                                                                                                                                                                                                                                                                                                                                         | 1249.6119 | 1249.6667 | -43.85 | 350   | 360  | 0    | ---  | K.LSFVTVDNSLR.R                    |
| 1287.6302                                                                                                                                                                                                                                                                                                                                                                                                                                                                                                                                                                                                                         | 1286.6229 | 1286.6830 | -46.71 | 777   | 789  | 0    | ---  | R.DTGLGLSPTASLR.V                  |
| 1302.6307                                                                                                                                                                                                                                                                                                                                                                                                                                                                                                                                                                                                                         | 1301.6234 | 1301.6762 | -40.52 | 587   | 598  | 0    | ---  | R.VTASPSQLCALR.A                   |
| 1421.6768                                                                                                                                                                                                                                                                                                                                                                                                                                                                                                                                                                                                                         | 1420.6695 | 1420.7350 | -46.15 | 455   | 466  | 0    | 14   | R.SNSFVYLEPLPR.E                   |
| 1421.6768                                                                                                                                                                                                                                                                                                                                                                                                                                                                                                                                                                                                                         | 1420.6695 | 1420.7350 | -46.12 | 455   | 466  | 0    | ---  | R.SNSFVYLEPLPR.E                   |
| 1479.7271                                                                                                                                                                                                                                                                                                                                                                                                                                                                                                                                                                                                                         | 1478.7198 | 1478.6422 | 52.5   | 667   | 678  | 0    | ---  | K.DMYSFLQDMGLK.A + 2 Oxidation (M) |
| 1491.6775                                                                                                                                                                                                                                                                                                                                                                                                                                                                                                                                                                                                                         | 1490.6702 | 1490.7340 | -42.81 | 82    | 93   | 0    | ---  | K.DLFHCVSFTLPR.S                   |
| 1523.7185                                                                                                                                                                                                                                                                                                                                                                                                                                                                                                                                                                                                                         | 1522.7112 | 1522.7814 | -46.06 | 983   | 997  | 0    | ---  | R.ASFVSLGDILGSAMR.N                |
| 1707.8094                                                                                                                                                                                                                                                                                                                                                                                                                                                                                                                                                                                                                         | 1706.8021 | 1706.8913 | -52.25 | 94    | 108  | 0    | ---  | R.SPTSQEVFMFLTIQVK.G               |
| 1900.9595                                                                                                                                                                                                                                                                                                                                                                                                                                                                                                                                                                                                                         | 1899.9522 | 1900.0306 | -41.25 | 540   | 557  | 0    | 13   | R.LLIYAILPDGEVVGDSAR.Y             |
| 1900.9595                                                                                                                                                                                                                                                                                                                                                                                                                                                                                                                                                                                                                         | 1899.9522 | 1900.0306 | -41.23 | 540   | 557  | 0    | ---  | R.LLIYAILPDGEVVGDSAR.Y             |
| 1991.8297                                                                                                                                                                                                                                                                                                                                                                                                                                                                                                                                                                                                                         | 1990.8224 | 1990.8909 | -34.39 | 718   | 734  | 0    | ---  | R.DFVHFDTTSEPTTETVR.K              |
| 2001.9189                                                                                                                                                                                                                                                                                                                                                                                                                                                                                                                                                                                                                         | 2000.9116 | 2000.9844 | -36.36 | 210   | 228  | 0    | ---  | K.GSGGTAEHPTTVEEFVLPK.F            |
| 2012.9465                                                                                                                                                                                                                                                                                                                                                                                                                                                                                                                                                                                                                         | 2011.9392 | 2012.0228 | -41.54 | 568   | 586  | 0    | ---  | K.VGLNFSFGQSFSPASQAHLR.V           |
| 2012.9465                                                                                                                                                                                                                                                                                                                                                                                                                                                                                                                                                                                                                         | 2011.9393 | 2012.0228 | -41.53 | 568   | 586  | 0    | ---  | K.VGLNFSFGQSFSPASQAHLR.V           |
| 2073.0088                                                                                                                                                                                                                                                                                                                                                                                                                                                                                                                                                                                                                         | 2072.0015 | 2072.0805 | -38.12 | 790   | 806  | 0    | ---  | R.VFQPFVVELTMPYSVIR.G              |
| 2927.5508                                                                                                                                                                                                                                                                                                                                                                                                                                                                                                                                                                                                                         | 2926.5435 | 2926.5837 | -13.74 | 599   | 625  | 0    | ---  | R.AVDQSVLLMRPEAELSAATVYNLLPVK.D    |
| No match to: 842.4690, 848.4879, 850.0154, 850.4973, 853.4743, 853.4743, 861.0195, 864.5118, 865.9869, 868.5078, 870.5034, 876.9944, 881.9677, 882.5228, 882.5228, 892.9686, 951.5814, 953.4899, 1017.6209, 1017.6209, 1019.6330, 1033.6514, 1045.5168, 1051.6565, 1051.6565, 1136.6420, 1147.6807, 1151.6740, 1165.6849, 1165.6849, 1300.7900, 1316.8218, 1334.8221, 1334.8221, 1356.6021, 1448.8531, 1454.7075, 1475.6875, 1518.6587, 1552.7145, 1559.7947, 1567.6738, 1617.9915, 1617.9915, 1732.0206, 2015.1936, 2044.9634, 2193.0256, 2211.0200, 2230.1453, 2233.0505, 2239.0674, 2283.0967, 2284.0908, 2305.0867, 3337.7156 |           |           |        |       |      |      |      |                                    |

7. [K4JBR5](#) Mass: 116087 Score: 75 Expect: 0.0041 Matches: 16

Alpha-2-macroglobulin variant 1 OS=Bos taurus OX=9913 GN=A2M PE=2 SV=1

| Observed                                                                                                                                                                                                                                                                                                                                                                                                                                                                                                                                                                                                                                               | Mr(expt)  | Mr(calc)  | ppm    | Start | End | Miss | Ions | Peptide                            |
|--------------------------------------------------------------------------------------------------------------------------------------------------------------------------------------------------------------------------------------------------------------------------------------------------------------------------------------------------------------------------------------------------------------------------------------------------------------------------------------------------------------------------------------------------------------------------------------------------------------------------------------------------------|-----------|-----------|--------|-------|-----|------|------|------------------------------------|
| 1250.6191                                                                                                                                                                                                                                                                                                                                                                                                                                                                                                                                                                                                                                              | 1249.6118 | 1249.6667 | -43.88 | 350   | 360 | 0    | ---  | K.LSFVTVDNSLR.R                    |
| 1250.6191                                                                                                                                                                                                                                                                                                                                                                                                                                                                                                                                                                                                                                              | 1249.6119 | 1249.6667 | -43.85 | 350   | 360 | 0    | ---  | K.LSFVTVDNSLR.R                    |
| 1287.6302                                                                                                                                                                                                                                                                                                                                                                                                                                                                                                                                                                                                                                              | 1286.6229 | 1286.6830 | -46.71 | 777   | 789 | 0    | ---  | R.DTGLGLSPTASLR.V                  |
| 1302.6307                                                                                                                                                                                                                                                                                                                                                                                                                                                                                                                                                                                                                                              | 1301.6234 | 1301.6762 | -40.52 | 587   | 598 | 0    | ---  | R.VTASPSQLCALR.A                   |
| 1421.6768                                                                                                                                                                                                                                                                                                                                                                                                                                                                                                                                                                                                                                              | 1420.6695 | 1420.7350 | -46.15 | 455   | 466 | 0    | 14   | R.SNSFVYLEPLPR.E                   |
| 1421.6768                                                                                                                                                                                                                                                                                                                                                                                                                                                                                                                                                                                                                                              | 1420.6695 | 1420.6367 | 23.1   | 667   | 678 | 0    | ---  | K.DMYSFLQDMGLK.A + 2 Oxidation (M) |
| 1491.6775                                                                                                                                                                                                                                                                                                                                                                                                                                                                                                                                                                                                                                              | 1490.6702 | 1490.7340 | -42.81 | 82    | 93  | 0    | ---  | K.DLFHCVSFTLPR.S                   |
| 1707.8094                                                                                                                                                                                                                                                                                                                                                                                                                                                                                                                                                                                                                                              | 1706.8021 | 1706.8913 | -52.25 | 94    | 108 | 0    | ---  | R.SPTSQEVFMFLTIQVK.G               |
| 1900.9595                                                                                                                                                                                                                                                                                                                                                                                                                                                                                                                                                                                                                                              | 1899.9522 | 1900.0306 | -41.25 | 540   | 557 | 0    | 13   | R.LLIYAILPDGEVVGDSAR.Y             |
| 1900.9595                                                                                                                                                                                                                                                                                                                                                                                                                                                                                                                                                                                                                                              | 1899.9522 | 1900.0306 | -41.23 | 540   | 557 | 0    | ---  | R.LLIYAILPDGEVVGDSAR.Y             |
| 1991.8297                                                                                                                                                                                                                                                                                                                                                                                                                                                                                                                                                                                                                                              | 1990.8224 | 1990.8909 | -34.39 | 718   | 734 | 0    | ---  | R.DFVHFDTTSEPTTETVR.K              |
| 2001.9189                                                                                                                                                                                                                                                                                                                                                                                                                                                                                                                                                                                                                                              | 2000.9116 | 2000.9844 | -36.36 | 210   | 228 | 0    | ---  | K.GSGGTAEHPTTVEEFVLPK.F            |
| 2012.9465                                                                                                                                                                                                                                                                                                                                                                                                                                                                                                                                                                                                                                              | 2011.9392 | 2012.0228 | -41.54 | 568   | 586 | 0    | ---  | K.VGLNFSFGQSFSPASQAHLR.V           |
| 2012.9465                                                                                                                                                                                                                                                                                                                                                                                                                                                                                                                                                                                                                                              | 2011.9393 | 2012.0228 | -41.53 | 568   | 586 | 0    | ---  | K.VGLNFSFGQSFSPASQAHLR.V           |
| 2073.0088                                                                                                                                                                                                                                                                                                                                                                                                                                                                                                                                                                                                                                              | 2072.0015 | 2072.0805 | -38.12 | 790   | 806 | 0    | ---  | R.VFQPFVVELTMPYSVIR.G              |
| 2927.5508                                                                                                                                                                                                                                                                                                                                                                                                                                                                                                                                                                                                                                              | 2926.5435 | 2926.5837 | -13.74 | 599   | 625 | 0    | ---  | R.AVDQSVLLMRPEAELSAATVYNLLPVK.D    |
| No match to: 842.4690, 848.4879, 850.0154, 850.4973, 853.4743, 853.4743, 861.0195, 864.5118, 865.9869, 868.5078, 870.5034, 876.9944, 881.9677, 882.5228, 882.5228, 892.9686, 951.5814, 953.4899, 996.5488, 1017.6209, 1017.6209, 1019.6330, 1033.6514, 1045.5168, 1051.6565, 1051.6565, 1131.6523, 1136.6420, 1147.6807, 1151.6740, 1165.6849, 1165.6849, 1300.7900, 1316.8218, 1334.8221, 1334.8221, 1356.6021, 1448.8531, 1454.7075, 1475.6875, 1518.6587, 1552.7145, 1559.7947, 1567.6738, 1617.9915, 1617.9915, 1732.0206, 2015.1936, 2044.9634, 2193.0256, 2211.0200, 2230.1453, 2233.0505, 2239.0674, 2283.0967, 2284.0908, 2305.0867, 3337.7156 |           |           |        |       |     |      |      |                                    |

8. [K4JDT2](#) Mass: 99307 Score: 68 Expect: 0.02 Matches: 15

Alpha-2-macroglobulin variant 20 OS=Bos taurus OX=9913 GN=A2M PE=2 SV=1

| Observed  | Mr(expt)  | Mr(calc)  | ppm    | Start | End | Miss | Ions | Peptide                            |
|-----------|-----------|-----------|--------|-------|-----|------|------|------------------------------------|
| 1250.6191 | 1249.6118 | 1249.6667 | -43.88 | 350   | 360 | 0    | ---  | K.LSFVTVDNSLR.R                    |
| 1250.6191 | 1249.6119 | 1249.6667 | -43.85 | 350   | 360 | 0    | ---  | K.LSFVTVDNSLR.R                    |
| 1287.6302 | 1286.6229 | 1286.6830 | -46.71 | 777   | 789 | 0    | ---  | R.DTGLGLSPTASLR.V                  |
| 1421.6768 | 1420.6695 | 1420.7350 | -46.15 | 455   | 466 | 0    | 14   | R.SNSFVYLEPLPR.E                   |
| 1421.6768 | 1420.6695 | 1420.7350 | -46.12 | 455   | 466 | 0    | ---  | R.SNSFVYLEPLPR.E                   |
| 1479.7271 | 1478.7198 | 1478.6422 | 52.5   | 667   | 678 | 0    | ---  | K.DMYSFLQDMGLK.A + 2 Oxidation (M) |

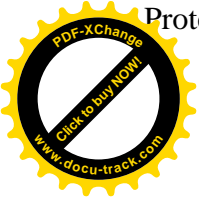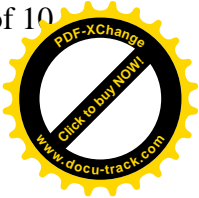

|                                                                                                                                                                                                                                                                                                                                                                                                                                                                                                                                                                                                                                                                                         |           |           |        |     |   |     |   |     |                          |
|-----------------------------------------------------------------------------------------------------------------------------------------------------------------------------------------------------------------------------------------------------------------------------------------------------------------------------------------------------------------------------------------------------------------------------------------------------------------------------------------------------------------------------------------------------------------------------------------------------------------------------------------------------------------------------------------|-----------|-----------|--------|-----|---|-----|---|-----|--------------------------|
| 1491.6775                                                                                                                                                                                                                                                                                                                                                                                                                                                                                                                                                                                                                                                                               | 1490.6702 | 1490.7340 | -42.81 | 82  | - | 93  | 0 | --- | K.DLFHCVSFTLPR.S         |
| 1707.8094                                                                                                                                                                                                                                                                                                                                                                                                                                                                                                                                                                                                                                                                               | 1706.8021 | 1706.8913 | -52.25 | 94  | - | 108 | 0 | --- | R.SPTSQEVFMFLTIQVK.G     |
| 1900.9595                                                                                                                                                                                                                                                                                                                                                                                                                                                                                                                                                                                                                                                                               | 1899.9522 | 1900.0306 | -41.25 | 540 | - | 557 | 0 | 13  | R.LLIYAILPDGEVVGDSAR.Y   |
| 1900.9595                                                                                                                                                                                                                                                                                                                                                                                                                                                                                                                                                                                                                                                                               | 1899.9522 | 1900.0306 | -41.23 | 540 | - | 557 | 0 | --- | R.LLIYAILPDGEVVGDSAR.Y   |
| 1991.8297                                                                                                                                                                                                                                                                                                                                                                                                                                                                                                                                                                                                                                                                               | 1990.8224 | 1990.8909 | -34.39 | 718 | - | 734 | 0 | --- | R.DFVHFDDTSEPPTETVR.K    |
| 2001.9189                                                                                                                                                                                                                                                                                                                                                                                                                                                                                                                                                                                                                                                                               | 2000.9116 | 2000.9844 | -36.36 | 210 | - | 228 | 0 | --- | K.GSGGTAEHFPTVEEFVLPK.F  |
| 2012.9465                                                                                                                                                                                                                                                                                                                                                                                                                                                                                                                                                                                                                                                                               | 2011.9392 | 2012.0228 | -41.54 | 568 | - | 586 | 0 | --- | K.VGLNFSFGQSFPPASQAHLR.V |
| 2012.9465                                                                                                                                                                                                                                                                                                                                                                                                                                                                                                                                                                                                                                                                               | 2011.9393 | 2012.0228 | -41.53 | 568 | - | 586 | 0 | --- | K.VGLNFSFGQSFPPASQAHLR.V |
| 2073.0088                                                                                                                                                                                                                                                                                                                                                                                                                                                                                                                                                                                                                                                                               | 2072.0015 | 2072.0805 | -38.12 | 790 | - | 806 | 0 | --- | R.VFQPFVVELTMPYSVIR.G    |
| No match to: 842.4690, 848.4879, 850.0154, 850.4973, 853.4743, 853.4743, 861.0195, 864.5118, 865.9869, 868.5078, 870.5034, 876.9944, 881.9677, 882.5228, 882.5228, 892.9686, 951.5814, 953.4899, 996.5488, 1017.6209, 1017.6209, 1019.6330, 1033.6514, 1045.5168, 1051.6565, 1051.6565, 1131.6523, 1136.6420, 1147.6807, 1151.6740, 1165.6849, 1165.6849, 1300.7900, 1302.6307, 1316.8218, 1334.8221, 1334.8221, 1356.6021, 1448.8531, 1454.7075, 1475.6875, 1518.6587, 1523.7185, 1552.7145, 1559.7947, 1567.6738, 1617.9915, 1617.9915, 1732.0206, 2015.1936, 2044.9634, 2193.0256, 2211.0200, 2230.1453, 2233.0505, 2239.0674, 2283.0967, 2284.0908, 2305.0867, 2927.5508, 3337.7156 |           |           |        |     |   |     |   |     |                          |

9. [A0A4W2FQH1](#) Mass: 164938 Score: 59 Expect: 0.17 Matches: 18

| Alpha-2-macroglobulin OS=Bos indicus x Bos taurus OX=30522 GN=A2M PE=4 SV=1                                                                                                                                                                                                                                                                                                                                                                                                                                                                                                                                                                             |           |           |        |       |     |      |      |         |                                    |
|---------------------------------------------------------------------------------------------------------------------------------------------------------------------------------------------------------------------------------------------------------------------------------------------------------------------------------------------------------------------------------------------------------------------------------------------------------------------------------------------------------------------------------------------------------------------------------------------------------------------------------------------------------|-----------|-----------|--------|-------|-----|------|------|---------|------------------------------------|
| Observed                                                                                                                                                                                                                                                                                                                                                                                                                                                                                                                                                                                                                                                | Mr(expt)  | Mr(calc)  | ppm    | Start | End | Miss | Ions | Peptide |                                    |
| 996.5488                                                                                                                                                                                                                                                                                                                                                                                                                                                                                                                                                                                                                                                | 995.5415  | 995.4607  | 81.2   | 1073  | -   | 1080 | 1    | ---     | K.QKSNCGCFR.S                      |
| 1131.6523                                                                                                                                                                                                                                                                                                                                                                                                                                                                                                                                                                                                                                               | 1130.6450 | 1130.6295 | 13.7   | 1081  | -   | 1091 | 0    | ---     | R.STGTLLNNAIK.G                    |
| 1250.6191                                                                                                                                                                                                                                                                                                                                                                                                                                                                                                                                                                                                                                               | 1249.6118 | 1249.6667 | -43.88 | 350   | -   | 360  | 0    | ---     | K.LSFVTVDNSLR.R                    |
| 1250.6191                                                                                                                                                                                                                                                                                                                                                                                                                                                                                                                                                                                                                                               | 1249.6119 | 1249.6667 | -43.85 | 350   | -   | 360  | 0    | ---     | K.LSFVTVDNSLR.R                    |
| 1287.6302                                                                                                                                                                                                                                                                                                                                                                                                                                                                                                                                                                                                                                               | 1286.6229 | 1286.6830 | -46.71 | 775   | -   | 787  | 0    | ---     | R.DTGLGLSPTASLR.V                  |
| 1302.6307                                                                                                                                                                                                                                                                                                                                                                                                                                                                                                                                                                                                                                               | 1301.6234 | 1301.6762 | -40.52 | 587   | -   | 598  | 0    | ---     | R.VTASPSQLCALR.A                   |
| 1479.7271                                                                                                                                                                                                                                                                                                                                                                                                                                                                                                                                                                                                                                               | 1478.7198 | 1478.6422 | 52.5   | 667   | -   | 678  | 0    | ---     | K.DMYSFLQDMGLK.A + 2 Oxidation (M) |
| 1491.6775                                                                                                                                                                                                                                                                                                                                                                                                                                                                                                                                                                                                                                               | 1490.6702 | 1490.7340 | -42.81 | 82    | -   | 93   | 0    | ---     | K.DLFHCVSFTLPR.S                   |
| 1523.7185                                                                                                                                                                                                                                                                                                                                                                                                                                                                                                                                                                                                                                               | 1522.7112 | 1522.7814 | -46.06 | 945   | -   | 959  | 0    | ---     | R.ASFVSLGDLGSAMR.N                 |
| 1707.8094                                                                                                                                                                                                                                                                                                                                                                                                                                                                                                                                                                                                                                               | 1706.8021 | 1706.8913 | -52.25 | 94    | -   | 108  | 0    | ---     | R.SPTSQEVFMFLTIQVK.G               |
| 1900.9595                                                                                                                                                                                                                                                                                                                                                                                                                                                                                                                                                                                                                                               | 1899.9522 | 1900.0306 | -41.25 | 540   | -   | 557  | 0    | 13      | R.LLIYAILPDGEVVGDSAR.Y             |
| 1900.9595                                                                                                                                                                                                                                                                                                                                                                                                                                                                                                                                                                                                                                               | 1899.9522 | 1900.0306 | -41.23 | 540   | -   | 557  | 0    | ---     | R.LLIYAILPDGEVVGDSAR.Y             |
| 1991.8297                                                                                                                                                                                                                                                                                                                                                                                                                                                                                                                                                                                                                                               | 1990.8224 | 1990.8909 | -34.39 | 716   | -   | 732  | 0    | ---     | R.DFVHFDDTSEPPTETVR.K              |
| 2001.9189                                                                                                                                                                                                                                                                                                                                                                                                                                                                                                                                                                                                                                               | 2000.9116 | 2000.9844 | -36.36 | 210   | -   | 228  | 0    | ---     | K.GSGGTAEHFPTVEEFVLPK.F            |
| 2012.9465                                                                                                                                                                                                                                                                                                                                                                                                                                                                                                                                                                                                                                               | 2011.9392 | 2012.0228 | -41.54 | 568   | -   | 586  | 0    | ---     | K.VGLNFSFGQSFPPASQAHLR.V           |
| 2012.9465                                                                                                                                                                                                                                                                                                                                                                                                                                                                                                                                                                                                                                               | 2011.9393 | 2012.0228 | -41.53 | 568   | -   | 586  | 0    | ---     | K.VGLNFSFGQSFPPASQAHLR.V           |
| 2073.0088                                                                                                                                                                                                                                                                                                                                                                                                                                                                                                                                                                                                                                               | 2072.0015 | 2072.0805 | -38.12 | 788   | -   | 804  | 0    | ---     | R.VFQPFVVELTMPYSVIR.G              |
| 2927.5508                                                                                                                                                                                                                                                                                                                                                                                                                                                                                                                                                                                                                                               | 2926.5435 | 2926.5837 | -13.74 | 599   | -   | 625  | 0    | ---     | R.AVDQSLLMRPEAELSAATVYNLLPVK.D     |
| No match to: 842.4690, 848.4879, 850.0154, 850.4973, 853.4743, 853.4743, 861.0195, 864.5118, 865.9869, 868.5078, 870.5034, 876.9944, 881.9677, 882.5228, 882.5228, 892.9686, 951.5814, 953.4899, 1017.6209, 1017.6209, 1019.6330, 1033.6514, 1045.5168, 1051.6565, 1051.6565, 1136.6420, 1147.6807, 1151.6740, 1165.6849, 1165.6849, 1300.7900, 1316.8218, 1334.8221, 1334.8221, 1356.6021, 1421.6768, 1421.6768, 1448.8531, 1454.7075, 1475.6875, 1518.6587, 1552.7145, 1559.7947, 1567.6738, 1617.9915, 1617.9915, 1732.0206, 2015.1936, 2044.9634, 2193.0256, 2211.0200, 2230.1453, 2233.0505, 2239.0674, 2283.0967, 2284.0908, 2305.0867, 3337.7156 |           |           |        |       |     |      |      |         |                                    |

10. [A0A4W2FQJ3](#) Mass: 166227 Score: 59 Expect: 0.19 Matches: 18

| Alpha-2-macroglobulin OS=Bos indicus x Bos taurus OX=30522 GN=A2M PE=4 SV=1                                                                                                                                                                                                                                                                                                                                                                                                                                                                                                                                                                             |           |           |        |       |     |      |      |         |                                    |
|---------------------------------------------------------------------------------------------------------------------------------------------------------------------------------------------------------------------------------------------------------------------------------------------------------------------------------------------------------------------------------------------------------------------------------------------------------------------------------------------------------------------------------------------------------------------------------------------------------------------------------------------------------|-----------|-----------|--------|-------|-----|------|------|---------|------------------------------------|
| Observed                                                                                                                                                                                                                                                                                                                                                                                                                                                                                                                                                                                                                                                | Mr(expt)  | Mr(calc)  | ppm    | Start | End | Miss | Ions | Peptide |                                    |
| 996.5488                                                                                                                                                                                                                                                                                                                                                                                                                                                                                                                                                                                                                                                | 995.5415  | 995.4607  | 81.2   | 1111  | -   | 1118 | 1    | ---     | K.QKSNCGCFR.S                      |
| 1131.6523                                                                                                                                                                                                                                                                                                                                                                                                                                                                                                                                                                                                                                               | 1130.6450 | 1130.6295 | 13.7   | 1119  | -   | 1129 | 0    | ---     | R.STGTLLNNAIK.G                    |
| 1250.6191                                                                                                                                                                                                                                                                                                                                                                                                                                                                                                                                                                                                                                               | 1249.6118 | 1249.6667 | -43.88 | 350   | -   | 360  | 0    | ---     | K.LSFVTVDNSLR.R                    |
| 1250.6191                                                                                                                                                                                                                                                                                                                                                                                                                                                                                                                                                                                                                                               | 1249.6119 | 1249.6667 | -43.85 | 350   | -   | 360  | 0    | ---     | K.LSFVTVDNSLR.R                    |
| 1287.6302                                                                                                                                                                                                                                                                                                                                                                                                                                                                                                                                                                                                                                               | 1286.6229 | 1286.6830 | -46.71 | 777   | -   | 789  | 0    | ---     | R.DTGLGLSPTASLR.V                  |
| 1302.6307                                                                                                                                                                                                                                                                                                                                                                                                                                                                                                                                                                                                                                               | 1301.6234 | 1301.6762 | -40.52 | 587   | -   | 598  | 0    | ---     | R.VTASPSQLCALR.A                   |
| 1479.7271                                                                                                                                                                                                                                                                                                                                                                                                                                                                                                                                                                                                                                               | 1478.7198 | 1478.6422 | 52.5   | 667   | -   | 678  | 0    | ---     | K.DMYSFLQDMGLK.A + 2 Oxidation (M) |
| 1491.6775                                                                                                                                                                                                                                                                                                                                                                                                                                                                                                                                                                                                                                               | 1490.6702 | 1490.7340 | -42.81 | 82    | -   | 93   | 0    | ---     | K.DLFHCVSFTLPR.S                   |
| 1523.7185                                                                                                                                                                                                                                                                                                                                                                                                                                                                                                                                                                                                                                               | 1522.7112 | 1522.7814 | -46.06 | 983   | -   | 997  | 0    | ---     | R.ASFVSLGDLGSAMR.N                 |
| 1707.8094                                                                                                                                                                                                                                                                                                                                                                                                                                                                                                                                                                                                                                               | 1706.8021 | 1706.8913 | -52.25 | 94    | -   | 108  | 0    | ---     | R.SPTSQEVFMFLTIQVK.G               |
| 1900.9595                                                                                                                                                                                                                                                                                                                                                                                                                                                                                                                                                                                                                                               | 1899.9522 | 1900.0306 | -41.25 | 540   | -   | 557  | 0    | 13      | R.LLIYAILPDGEVVGDSAR.Y             |
| 1900.9595                                                                                                                                                                                                                                                                                                                                                                                                                                                                                                                                                                                                                                               | 1899.9522 | 1900.0306 | -41.23 | 540   | -   | 557  | 0    | ---     | R.LLIYAILPDGEVVGDSAR.Y             |
| 1991.8297                                                                                                                                                                                                                                                                                                                                                                                                                                                                                                                                                                                                                                               | 1990.8224 | 1990.8909 | -34.39 | 718   | -   | 734  | 0    | ---     | R.DFVHFDDTSEPPTETVR.K              |
| 2001.9189                                                                                                                                                                                                                                                                                                                                                                                                                                                                                                                                                                                                                                               | 2000.9116 | 2000.9844 | -36.36 | 210   | -   | 228  | 0    | ---     | K.GSGGTAEHFPTVEEFVLPK.F            |
| 2012.9465                                                                                                                                                                                                                                                                                                                                                                                                                                                                                                                                                                                                                                               | 2011.9392 | 2012.0228 | -41.54 | 568   | -   | 586  | 0    | ---     | K.VGLNFSFGQSFPPASQAHLR.V           |
| 2012.9465                                                                                                                                                                                                                                                                                                                                                                                                                                                                                                                                                                                                                                               | 2011.9393 | 2012.0228 | -41.53 | 568   | -   | 586  | 0    | ---     | K.VGLNFSFGQSFPPASQAHLR.V           |
| 2073.0088                                                                                                                                                                                                                                                                                                                                                                                                                                                                                                                                                                                                                                               | 2072.0015 | 2072.0805 | -38.12 | 790   | -   | 806  | 0    | ---     | R.VFQPFVVELTMPYSVIR.G              |
| 2927.5508                                                                                                                                                                                                                                                                                                                                                                                                                                                                                                                                                                                                                                               | 2926.5435 | 2926.5837 | -13.74 | 599   | -   | 625  | 0    | ---     | R.AVDQSLLMRPEAELSAATVYNLLPVK.D     |
| No match to: 842.4690, 848.4879, 850.0154, 850.4973, 853.4743, 853.4743, 861.0195, 864.5118, 865.9869, 868.5078, 870.5034, 876.9944, 881.9677, 882.5228, 882.5228, 892.9686, 951.5814, 953.4899, 1017.6209, 1017.6209, 1019.6330, 1033.6514, 1045.5168, 1051.6565, 1051.6565, 1136.6420, 1147.6807, 1151.6740, 1165.6849, 1165.6849, 1300.7900, 1316.8218, 1334.8221, 1334.8221, 1356.6021, 1421.6768, 1421.6768, 1448.8531, 1454.7075, 1475.6875, 1518.6587, 1552.7145, 1559.7947, 1567.6738, 1617.9915, 1617.9915, 1732.0206, 2015.1936, 2044.9634, 2193.0256, 2211.0200, 2230.1453, 2233.0505, 2239.0674, 2283.0967, 2284.0908, 2305.0867, 3337.7156 |           |           |        |       |     |      |      |         |                                    |

11. [A0A4W2FQM6](#) Mass: 168925 Score: 58 Expect: 0.22 Matches: 18

| Alpha-2-macroglobulin OS=Bos indicus x Bos taurus OX=30522 GN=A2M PE=4 SV=1 |           |           |        |       |     |      |      |         |                                    |
|-----------------------------------------------------------------------------|-----------|-----------|--------|-------|-----|------|------|---------|------------------------------------|
| Observed                                                                    | Mr(expt)  | Mr(calc)  | ppm    | Start | End | Miss | Ions | Peptide |                                    |
| 996.5488                                                                    | 995.5415  | 995.4607  | 81.2   | 1111  | -   | 1118 | 1    | ---     | K.QKSNCGCFR.S                      |
| 1131.6523                                                                   | 1130.6450 | 1130.6295 | 13.7   | 1119  | -   | 1129 | 0    | ---     | R.STGTLLNNAIK.G                    |
| 1250.6191                                                                   | 1249.6118 | 1249.6667 | -43.88 | 350   | -   | 360  | 0    | ---     | K.LSFVTVDNSLR.R                    |
| 1250.6191                                                                   | 1249.6119 | 1249.6667 | -43.85 | 350   | -   | 360  | 0    | ---     | K.LSFVTVDNSLR.R                    |
| 1287.6302                                                                   | 1286.6229 | 1286.6830 | -46.71 | 777   | -   | 789  | 0    | ---     | R.DTGLGLSPTASLR.V                  |
| 1302.6307                                                                   | 1301.6234 | 1301.6762 | -40.52 | 587   | -   | 598  | 0    | ---     | R.VTASPSQLCALR.A                   |
| 1479.7271                                                                   | 1478.7198 | 1478.6422 | 52.5   | 667   | -   | 678  | 0    | ---     | K.DMYSFLQDMGLK.A + 2 Oxidation (M) |
| 1491.6775                                                                   | 1490.6702 | 1490.7340 | -42.81 | 82    | -   | 93   | 0    | ---     | K.DLFHCVSFTLPR.S                   |
| 1523.7185                                                                   | 1522.7112 | 1522.7814 | -46.06 | 983   | -   | 997  | 0    | ---     | R.ASFVSLGDLGSAMR.N                 |
| 1707.8094                                                                   | 1706.8021 | 1706.8913 | -52.25 | 94    | -   | 108  | 0    | ---     | R.SPTSQEVFMFLTIQVK.G               |
| 1900.9595                                                                   | 1899.9522 | 1900.0306 | -41.25 | 540   | -   | 557  | 0    | 13      | R.LLIYAILPDGEVVGDSAR.Y             |
| 1900.9595                                                                   | 1899.9522 | 1900.0306 | -41.23 | 540   | -   | 557  | 0    | ---     | R.LLIYAILPDGEVVGDSAR.Y             |
| 1991.8297                                                                   | 1990.8224 | 1990.8909 | -34.39 | 718   | -   | 734  | 0    | ---     | R.DFVHFDDTSEPPTETVR.K              |
| 2001.9189                                                                   | 2000.9116 | 2000.9844 | -36.36 | 210   | -   | 228  | 0    | ---     | K.GSGGTAEHFPTVEEFVLPK.F            |
| 2012.9465                                                                   | 2011.9392 | 2012.0228 | -41.54 | 568   | -   | 586  | 0    | ---     | K.VGLNFSFGQSFPPASQAHLR.V           |
| 2012.9465                                                                   | 2011.9393 | 2012.0228 | -41.53 | 568   | -   | 586  | 0    | ---     | K.VGLNFSFGQSFPPASQAHLR.V           |
| 2073.0088                                                                   | 2072.0015 | 2072.0805 | -38.12 | 790   | -   | 806  | 0    | ---     | R.VFQPFVVELTMPYSVIR.G              |
| 2927.5508                                                                   | 2926.5435 | 2926.5837 | -13.74 | 599   | -   | 625  | 0    | ---     | R.AVDQSLLMRPEAELSAATVYNLLPVK.D     |

No match to: 842.4690, 848.4879, 850.0154, 850.4973, 853.4743, 853.4743, 861.0195, 864.5118, 865.9869, 868.5078, 870.5034, 876.9944, 881.9677, 882.5228, 882.5228, 892.9686, 951.5814, 953.4899, 1017.6209, 1017.6209, 1019.6330, 1033.6514, 1045.5168, 1051.6565, 1051.6565, 1136.6420, 1147.6807, 1151.6740, 1165.6849, 1165.6849, 1300.7900, 1316.8218, 1334.8221, 1334.8221, 1356.6021, 1421.6768, 1421.6768, 1448.8531, 1454.7075, 1475.6875, 1518.6587, 1552.7145, 1559.7947, 1567.6738, 1617.9915, 1617.9915, 1732.0206, 2015.1936, 2044.9634, 2193.0256, 2211.0200, 2230.1453, 2233.0505, 2239.0674, 2283.0967, 2284.0908, 2305.0867, 3337.7156

12. A0A4W2HWM5 Mass: 168978 Score: 58 Expect: 0.22 Matches: 18

Alpha-2-macroglobulin OS=Bos indicus x Bos taurus OX=30522 GN=A2M PE=4 SV=1

| Observed  | Mr(expt)  | Mr(calc)  | ppm    | Start | End  | Miss | Ions | Peptide                            |
|-----------|-----------|-----------|--------|-------|------|------|------|------------------------------------|
| 996.5488  | 995.5415  | 995.4607  | 81.2   | 1111  | 1118 | 1    | ---  | K.QKSNCGCFR.S                      |
| 1131.6523 | 1130.6450 | 1130.6295 | 13.7   | 1119  | 1129 | 0    | ---  | R.STGTLLNNAIK.G                    |
| 1250.6191 | 1249.6118 | 1249.6667 | -43.88 | 350   | 360  | 0    | ---  | K.LSFVTVDNLR.R                     |
| 1250.6191 | 1249.6119 | 1249.6667 | -43.85 | 350   | 360  | 0    | ---  | K.LSFVTVDNLR.R                     |
| 1287.6302 | 1286.6229 | 1286.6830 | -46.71 | 777   | 789  | 0    | ---  | R.DTGLGLSPTASLR.V                  |
| 1302.6307 | 1301.6234 | 1301.6762 | -40.52 | 587   | 598  | 0    | ---  | R.VTASPSQLCALR.A                   |
| 1479.7271 | 1478.7198 | 1478.6422 | 52.5   | 667   | 678  | 0    | ---  | K.DMYSFLQDMGLK.A + 2 Oxidation (M) |
| 1491.6775 | 1490.6702 | 1490.7340 | -42.81 | 82    | 93   | 0    | ---  | K.DLFHCVSFTLPR.S                   |
| 1523.7185 | 1522.7112 | 1522.7814 | -46.06 | 983   | 997  | 0    | ---  | R.ASFVSLGDLGSAKR.N                 |
| 1707.8094 | 1706.8021 | 1706.8913 | -52.25 | 94    | 108  | 0    | ---  | R.SPTSQEVMLFTIQVK.G                |
| 1900.9595 | 1899.9522 | 1900.0306 | -41.25 | 540   | 557  | 0    | 13   | R.LLIYAILPDGEVVGDSAR.Y             |
| 1900.9595 | 1899.9522 | 1900.0306 | -41.23 | 540   | 557  | 0    | ---  | R.LLIYAILPDGEVVGDSAR.Y             |
| 1991.8297 | 1990.8224 | 1990.8909 | -34.39 | 718   | 734  | 0    | ---  | R.DFVHFDSTSEPTETVR.K               |
| 2001.9189 | 2000.9116 | 2000.9844 | -36.36 | 210   | 228  | 0    | ---  | K.GSGGTAEHPTVEEFVLPK.F             |
| 2012.9465 | 2011.9392 | 2012.0228 | -41.54 | 568   | 586  | 0    | ---  | K.VGLNFSFGQSFPASQAHLR.V            |
| 2012.9465 | 2011.9393 | 2012.0228 | -41.53 | 568   | 586  | 0    | ---  | K.VGLNFSFGQSFPASQAHLR.V            |
| 2073.0088 | 2072.0015 | 2072.0805 | -38.12 | 790   | 806  | 0    | ---  | R.VFQPFVVELTMPYSVIR.G              |
| 2927.5508 | 2926.5435 | 2926.5837 | -13.74 | 599   | 625  | 0    | ---  | R.AVDQSLLMRPEALSAATVYNLLPVK.D      |

No match to: 842.4690, 848.4879, 850.0154, 850.4973, 853.4743, 853.4743, 861.0195, 864.5118, 865.9869, 868.5078, 870.5034, 876.9944, 881.9677, 882.5228, 882.5228, 892.9686, 951.5814, 953.4899, 1017.6209, 1017.6209, 1019.6330, 1033.6514, 1045.5168, 1051.6565, 1051.6565, 1136.6420, 1147.6807, 1151.6740, 1165.6849, 1165.6849, 1300.7900, 1316.8218, 1334.8221, 1334.8221, 1356.6021, 1421.6768, 1421.6768, 1448.8531, 1454.7075, 1475.6875, 1518.6587, 1552.7145, 1559.7947, 1567.6738, 1617.9915, 1617.9915, 1732.0206, 2015.1936, 2044.9634, 2193.0256, 2211.0200, 2230.1453, 2233.0505, 2239.0674, 2283.0967, 2284.0908, 2305.0867, 3337.7156

13. A0A4W2HMS1 Mass: 168906 Score: 58 Expect: 0.22 Matches: 18

Alpha-2-macroglobulin OS=Bos indicus x Bos taurus OX=30522 GN=A2M PE=4 SV=1

| Observed  | Mr(expt)  | Mr(calc)  | ppm    | Start | End  | Miss | Ions | Peptide                            |
|-----------|-----------|-----------|--------|-------|------|------|------|------------------------------------|
| 996.5488  | 995.5415  | 995.4607  | 81.2   | 1111  | 1118 | 1    | ---  | K.QKSNCGCFR.S                      |
| 1131.6523 | 1130.6450 | 1130.6295 | 13.7   | 1119  | 1129 | 0    | ---  | R.STGTLLNNAIK.G                    |
| 1250.6191 | 1249.6118 | 1249.6667 | -43.88 | 350   | 360  | 0    | ---  | K.LSFVTVDNLR.R                     |
| 1250.6191 | 1249.6119 | 1249.6667 | -43.85 | 350   | 360  | 0    | ---  | K.LSFVTVDNLR.R                     |
| 1287.6302 | 1286.6229 | 1286.6830 | -46.71 | 777   | 789  | 0    | ---  | R.DTGLGLSPTASLR.V                  |
| 1302.6307 | 1301.6234 | 1301.6762 | -40.52 | 587   | 598  | 0    | ---  | R.VTASPSQLCALR.A                   |
| 1479.7271 | 1478.7198 | 1478.6422 | 52.5   | 667   | 678  | 0    | ---  | K.DMYSFLQDMGLK.A + 2 Oxidation (M) |
| 1491.6775 | 1490.6702 | 1490.7340 | -42.81 | 82    | 93   | 0    | ---  | K.DLFHCVSFTLPR.S                   |
| 1523.7185 | 1522.7112 | 1522.7814 | -46.06 | 983   | 997  | 0    | ---  | R.ASFVSLGDLGSAKR.N                 |
| 1707.8094 | 1706.8021 | 1706.8913 | -52.25 | 94    | 108  | 0    | ---  | R.SPTSQEVMLFTIQVK.G                |
| 1900.9595 | 1899.9522 | 1900.0306 | -41.25 | 540   | 557  | 0    | 13   | R.LLIYAILPDGEVVGDSAR.Y             |
| 1900.9595 | 1899.9522 | 1900.0306 | -41.23 | 540   | 557  | 0    | ---  | R.LLIYAILPDGEVVGDSAR.Y             |
| 1991.8297 | 1990.8224 | 1990.8909 | -34.39 | 718   | 734  | 0    | ---  | R.DFVHFDSTSEPTETVR.K               |
| 2001.9189 | 2000.9116 | 2000.9844 | -36.36 | 210   | 228  | 0    | ---  | K.GSGGTAEHPTVEEFVLPK.F             |
| 2012.9465 | 2011.9392 | 2012.0228 | -41.54 | 568   | 586  | 0    | ---  | K.VGLNFSFGQSFPASQAHLR.V            |
| 2012.9465 | 2011.9393 | 2012.0228 | -41.53 | 568   | 586  | 0    | ---  | K.VGLNFSFGQSFPASQAHLR.V            |
| 2073.0088 | 2072.0015 | 2072.0805 | -38.12 | 790   | 806  | 0    | ---  | R.VFQPFVVELTMPYSVIR.G              |
| 2927.5508 | 2926.5435 | 2926.5837 | -13.74 | 599   | 625  | 0    | ---  | R.AVDQSLLMRPEALSAATVYNLLPVK.D      |

No match to: 842.4690, 848.4879, 850.0154, 850.4973, 853.4743, 853.4743, 861.0195, 864.5118, 865.9869, 868.5078, 870.5034, 876.9944, 881.9677, 882.5228, 882.5228, 892.9686, 951.5814, 953.4899, 1017.6209, 1017.6209, 1019.6330, 1033.6514, 1045.5168, 1051.6565, 1051.6565, 1136.6420, 1147.6807, 1151.6740, 1165.6849, 1165.6849, 1300.7900, 1316.8218, 1334.8221, 1334.8221, 1356.6021, 1421.6768, 1421.6768, 1448.8531, 1454.7075, 1475.6875, 1518.6587, 1552.7145, 1559.7947, 1567.6738, 1617.9915, 1617.9915, 1732.0206, 2015.1936, 2044.9634, 2193.0256, 2211.0200, 2230.1453, 2233.0505, 2239.0674, 2283.0967, 2284.0908, 2305.0867, 3337.7156

14. A0A4W2BQ12 Mass: 48807 Score: 41 Expect: 12 Matches: 11

Tripartite motif containing 77 OS=Bos indicus x Bos taurus OX=30522 GN=TRIM77 PE=4 SV=1

| Observed  | Mr(expt)  | Mr(calc)  | ppm    | Start | End | Miss | Ions | Peptide                             |
|-----------|-----------|-----------|--------|-------|-----|------|------|-------------------------------------|
| 842.4690  | 841.4617  | 841.4882  | -31.47 | 212   | 218 | 1    | ---  | R.LNRNVAR.M                         |
| 1045.5168 | 1044.5095 | 1044.5096 | -0.07  | 138   | 145 | 0    | ---  | R.EHLLMQMK.S + Oxidation (M)        |
| 1136.6420 | 1135.6347 | 1135.5510 | 73.8   | 20    | 29  | 0    | ---  | K.DTFTDPATIR.C                      |
| 1300.7900 | 1299.7827 | 1299.6540 | 99.1   | 91    | 100 | 1    | ---  | K.QMCRTHQVIK.L                      |
| 1518.6587 | 1517.6514 | 1517.7508 | -65.47 | 76    | 90  | 0    | ---  | R.STGNSVICQLPGSAK.Q                 |
| 1559.7947 | 1558.7874 | 1558.8000 | -8.04  | 138   | 149 | 1    | ---  | R.EHLLMQMKSIWK.K + Oxidation (M)    |
| 1567.6738 | 1566.6665 | 1566.6906 | -15.35 | 240   | 253 | 0    | ---  | K.ADVDMQLQGVEDTMK.R + Oxidation (M) |
| 1707.8094 | 1706.8021 | 1706.7968 | 3.15   | 240   | 254 | 1    | ---  | K.ADVDMQLQGVEDTMKR.S                |
| 2012.9465 | 2011.9392 | 2012.0877 | -73.79 | 195   | 211 | 1    | ---  | K.QKHLEMLAIEGTVIFQR.L               |
| 2012.9465 | 2011.9393 | 2012.0877 | -73.77 | 195   | 211 | 1    | ---  | K.QKHLEMLAIEGTVIFQR.L               |
| 2193.0256 | 2192.0183 | 2192.1333 | -52.46 | 366   | 383 | 1    | ---  | R.NDMLNSEDIFLLLCVKR.K               |

No match to: 848.4879, 850.0154, 850.4973, 853.4743, 853.4743, 861.0195, 864.5118, 865.9869, 868.5078, 870.5034, 876.9944, 881.9677, 882.5228, 882.5228, 892.9686, 951.5814, 953.4899, 956.5488, 1017.6209, 1017.6209, 1019.6330, 1033.6514, 1051.6565, 1051.6565, 1131.6523, 1147.6807, 1151.6740, 1165.6849, 1165.6849, 1250.6191, 1250.6191, 1287.6302, 1302.6307, 1316.8218, 1334.8221, 1334.8221, 1356.6021, 1421.6768, 1421.6768, 1448.8531, 1454.7075, 1475.6875, 1479.7271, 1491.6775, 1523.7185, 1552.7145, 1617.9915, 1617.9915, 1732.0206, 1900.9595, 1900.9595, 1991.8297, 2001.9189, 2015.1936, 2044.9634, 2073.0088, 2211.0200, 2230.1453, 2233.0505, 2239.0674, 2283.0967, 2284.0908, 2305.0867, 2927.5508, 3337.7156

15. A0A4W2FVS5 Mass: 48837 Score: 41 Expect: 12 Matches: 11

Uncharacterized protein OS=Bos indicus x Bos taurus OX=30522 GN=LOC113885841 PE=4 SV=1

| Observed  | Mr(expt)  | Mr(calc)  | ppm    | Start | End | Miss | Ions | Peptide                          |
|-----------|-----------|-----------|--------|-------|-----|------|------|----------------------------------|
| 842.4690  | 841.4617  | 841.4882  | -31.47 | 212   | 218 | 1    | ---  | R.LNRNVAR.M                      |
| 1045.5168 | 1044.5095 | 1044.5096 | -0.07  | 138   | 145 | 0    | ---  | R.EHLLMQMK.S + Oxidation (M)     |
| 1136.6420 | 1135.6347 | 1135.5510 | 73.8   | 20    | 29  | 0    | ---  | K.DTFTDPATIR.C                   |
| 1300.7900 | 1299.7827 | 1299.6540 | 99.1   | 91    | 100 | 1    | ---  | K.QMCRTHQVIK.L                   |
| 1518.6587 | 1517.6514 | 1517.7508 | -65.47 | 76    | 90  | 0    | ---  | R.STGNSVICQLPGSAK.Q              |
| 1559.7947 | 1558.7874 | 1558.8000 | -8.04  | 138   | 149 | 1    | ---  | R.EHLLMQMKSIWK.K + Oxidation (M) |



1567.6738 1566.6665 1566.6906 -15.35 240 - 253 0 --- K.ADVDMQLQGVEDTMK.R + Oxidation (M)  
1707.8094 1706.8021 1706.7968 3.15 240 - 254 1 --- K.ADVDMQLQGVEDTMKR.S  
2012.9465 2011.9392 2012.0877 -73.79 195 - 211 1 --- K.QKHLEMLAIEGTVIFQR.L  
2012.9465 2011.9393 2012.0877 -73.77 195 - 211 1 --- K.QKHLEMLAIEGTVIFQR.L  
2193.0256 2192.0183 2192.1333 -52.46 366 - 383 1 --- R.NDMLLNSIEDIFLLLCVKR.K  
**No match to:** 848.4879, 850.0154, 850.4973, 853.4743, 853.4743, 861.0195, 864.5118, 865.9869, 868.5078, 870.5034, 876.9944, 881.9677, 882.5228, 882.5228, 892.9686, 951.5814, 953.4899, 996.5488, 1017.6209, 1017.6209, 1019.6330, 1033.6514, 1051.6565, 1051.6565, 1131.6523, 1147.6807, 1151.6740, 1165.6849, 1165.6849, 1250.6191, 1250.6191, 1287.6302, 1302.6307, 1316.8218, 1334.8221, 1334.8221, 1356.6021, 1356.6021, 1421.6768, 1421.6768, 1448.8531, 1454.7075, 1475.6875, 1479.7271, 1491.6775, 1523.7185, 1552.7145, 1617.9915, 1617.9915, 1732.0206, 1900.9595, 1900.9595, 1991.8297, 2001.9189, 2015.1936, 2044.9634, 2073.0088, 2211.0200, 2230.1453, 2233.0505, 2239.0674, 2283.0967, 2284.0908, 2305.0867, 2927.5508, 3337.7156

16. [A0A1L7BC46](#) Mass: 55660 Score: 39 Expect: 15 Matches: 10

NS5A (Fragment) OS=Bovine viral diarrhea virus OX=11099 PE=4 SV=1  

| Observed  | Mr(expt)  | Mr(calc)  | ppm    | Start | End | Miss | Ions | Peptide                          |
|-----------|-----------|-----------|--------|-------|-----|------|------|----------------------------------|
| 1033.6514 | 1032.6441 | 1032.5716 | 70.2   | 91    | 99  | 1    | ---  | R.GPVNRYRVTK.Y                   |
| 1045.5168 | 1044.5095 | 1044.5240 | -13.88 | 459   | 467 | 0    | ---  | K.YHLVGVDVK.V                    |
| 1250.6191 | 1249.6118 | 1249.6779 | -52.84 | 356   | 366 | 1    | ---  | K.TARNINLYTGK.D                  |
| 1250.6191 | 1249.6119 | 1249.6779 | -52.81 | 356   | 366 | 1    | ---  | K.TARNINLYTGK.D                  |
| 1356.6021 | 1355.5948 | 1355.6036 | -6.46  | 57    | 67  | 1    | ---  | K.CPCGYEMKALK.N                  |
| 1448.8531 | 1447.8458 | 1447.7671 | 54.4   | 45    | 56  | 1    | ---  | R.LPTDNYLRVETK.C                 |
| 1523.7185 | 1522.7112 | 1522.8256 | -75.11 | 143   | 155 | 1    | ---  | K.WEVEHGVVTRLAK.R                |
| 1552.7145 | 1551.7072 | 1551.7457 | -24.78 | 387   | 399 | 0    | ---  | R.DFNPELSELVDFK.G                |
| 2001.9189 | 2000.9116 | 2001.0935 | -90.88 | 107   | 123 | 1    | ---  | K.EIKPVAKLEGLVDHYK.G             |
| 2927.5508 | 2926.5435 | 2926.3945 | 50.9   | 298   | 326 | 1    | ---  | K.TEPNADGGPSSIKIGLDEGSYPGGLQDR.T |

**No match to:** 842.4690, 848.4879, 850.0154, 850.4973, 853.4743, 853.4743, 861.0195, 864.5118, 865.9869, 868.5078, 870.5034, 876.9944, 881.9677, 882.5228, 882.5228, 892.9686, 951.5814, 953.4899, 996.5488, 1017.6209, 1017.6209, 1019.6330, 1033.6514, 1051.6565, 1051.6565, 1131.6523, 1136.6420, 1147.6807, 1151.6740, 1165.6849, 1165.6849, 1287.6302, 1300.7900, 1302.6307, 1316.8218, 1334.8221, 1334.8221, 1421.6768, 1421.6768, 1454.7075, 1475.6875, 1479.7271, 1491.6775, 1518.6587, 1552.7145, 1559.7947, 1567.6738, 1617.9915, 1617.9915, 1707.8094, 1732.0206, 1900.9595, 1900.9595, 1991.8297, 2012.9465, 2012.9465, 2015.1936, 2044.9634, 2073.0088, 2193.0256, 2211.0200, 2230.1453, 2233.0505, 2239.0674, 2283.0967, 2284.0908, 2305.0867, 3337.7156

17. [A0A4W2FCR6](#) Mass: 52833 Score: 36 Expect: 36 Matches: 8

Reverse transcriptase domain-containing protein OS=Bos indicus x Bos taurus OX=30522 PE=4 SV=1  

| Observed  | Mr(expt)  | Mr(calc)  | ppm    | Start | End | Miss | Ions | Peptide                                      |
|-----------|-----------|-----------|--------|-------|-----|------|------|----------------------------------------------|
| 848.4879  | 847.4806  | 847.4287  | 61.3   | 381   | 387 | 1    | ---  | K.VKEESEK.V                                  |
| 864.5118  | 863.5045  | 863.5453  | -47.26 | 440   | 446 | 1    | ---  | K.RHLLLR.N                                   |
| 868.5078  | 867.5005  | 867.4888  | 13.5   | 376   | 382 | 1    | ---  | K.SFLMKVK.E + Oxidation (M)                  |
| 1131.6523 | 1130.6450 | 1130.5720 | 64.6   | 221   | 230 | 0    | ---  | R.ELPDVQAGFR.K                               |
| 1356.6021 | 1355.5948 | 1355.6642 | -51.20 | 370   | 380 | 1    | ---  | K.SEEELKSFLMK.V + Oxidation (M)              |
| 1479.7271 | 1478.7198 | 1478.6922 | 18.7   | 75    | 87  | 1    | ---  | R.NGMDLTAEDIKK.R + Oxidation (M)             |
| 2283.0967 | 2282.0894 | 2282.0249 | 28.3   | 255   | 272 | 1    | ---  | K.NICCFDIYAKTFDCVDHKK.L                      |
| 2927.5508 | 2926.5435 | 2926.3767 | 57.0   | 99    | 123 | 1    | ---  | K.GLRLDPDNHGMITNLEPDILEYEV.R + Oxidation (M) |

**No match to:** 842.4690, 850.0154, 850.4973, 853.4743, 853.4743, 861.0195, 865.9869, 870.5034, 876.9944, 881.9677, 882.5228, 882.5228, 892.9686, 951.5814, 953.4899, 996.5488, 1017.6209, 1017.6209, 1019.6330, 1033.6514, 1045.5168, 1051.6565, 1051.6565, 1136.6420, 1147.6807, 1151.6740, 1165.6849, 1165.6849, 1250.6191, 1250.6191, 1287.6302, 1300.7900, 1302.6307, 1316.8218, 1334.8221, 1334.8221, 1421.6768, 1421.6768, 1448.8531, 1454.7075, 1475.6875, 1491.6775, 1518.6587, 1523.7185, 1552.7145, 1559.7947, 1567.6738, 1617.9915, 1617.9915, 1707.8094, 1732.0206, 1900.9595, 1900.9595, 1991.8297, 2001.9189, 2015.1936, 2044.9634, 2073.0088, 2193.0256, 2211.0200, 2230.1453, 2233.0505, 2239.0674, 2284.0908, 2305.0867, 3337.7156

18. [A0A4W2HM23](#) Mass: 53406 Score: 35 Expect: 40 Matches: 10

Glucosaminyl (N-acetyl) transferase 4 OS=Bos indicus x Bos taurus OX=30522 GN=GCNT4 PE=4 SV=1  

| Observed  | Mr(expt)  | Mr(calc)  | ppm    | Start | End | Miss | Ions | Peptide                              |
|-----------|-----------|-----------|--------|-------|-----|------|------|--------------------------------------|
| 996.5488  | 995.5415  | 995.5651  | -23.72 | 346   | 355 | 0    | ---  | R.VPGIPGEISK.T                       |
| 1033.6514 | 1032.6441 | 1032.5968 | 45.9   | 435   | 443 | 1    | ---  | R.KWITLSSAK.L                        |
| 1131.6523 | 1130.6450 | 1130.5760 | 61.0   | 315   | 323 | 0    | ---  | K.YIFNNSFVK.D                        |
| 1165.6849 | 1164.6776 | 1164.6026 | 64.4   | 236   | 245 | 0    | ---  | K.SNFELVSELK.K                       |
| 1165.6849 | 1164.6777 | 1164.6026 | 64.4   | 236   | 245 | 0    | ---  | K.SNFELVSELK.K                       |
| 1316.8218 | 1315.8145 | 1315.6884 | 95.8   | 193   | 203 | 0    | ---  | K.LETVQYAHISR.L                      |
| 1448.8531 | 1447.8458 | 1447.7267 | 82.3   | 356   | 368 | 1    | ---  | K.TAQDVSDLQSKTR.L                    |
| 1732.0206 | 1731.0133 | 1730.8873 | 72.8   | 247   | 262 | 0    | ---  | K.LNGSNMLETVKPPSTK.T + Oxidation (M) |
| 2012.9465 | 2011.9392 | 2011.9832 | -21.87 | 315   | 330 | 1    | ---  | K.YIFNNSFVKDFFAWSK.D                 |
| 2012.9465 | 2011.9393 | 2011.9832 | -21.86 | 315   | 330 | 1    | ---  | K.YIFNNSFVKDFFAWSK.D                 |

**No match to:** 842.4690, 848.4879, 850.0154, 850.4973, 853.4743, 853.4743, 861.0195, 864.5118, 865.9869, 868.5078, 870.5034, 876.9944, 881.9677, 882.5228, 882.5228, 892.9686, 951.5814, 953.4899, 996.5488, 1017.6209, 1017.6209, 1019.6330, 1045.5168, 1051.6565, 1051.6565, 1136.6420, 1147.6807, 1151.6740, 1250.6191, 1250.6191, 1287.6302, 1300.7900, 1302.6307, 1334.8221, 1334.8221, 1356.6021, 1421.6768, 1421.6768, 1454.7075, 1475.6875, 1479.7271, 1491.6775, 1518.6587, 1523.7185, 1552.7145, 1559.7947, 1567.6738, 1617.9915, 1617.9915, 1707.8094, 1900.9595, 1900.9595, 1991.8297, 2001.9189, 2015.1936, 2044.9634, 2073.0088, 2193.0256, 2211.0200, 2230.1453, 2233.0505, 2239.0674, 2283.0967, 2284.0908, 2305.0867, 2927.5508, 3337.7156

19. [A0A1L7BC66](#) Mass: 56212 Score: 35 Expect: 46 Matches: 11

NS5A (Fragment) OS=Bovine viral diarrhea virus OX=11099 PE=4 SV=1  

| Observed  | Mr(expt)  | Mr(calc)  | ppm    | Start | End | Miss | Ions | Peptide                            |
|-----------|-----------|-----------|--------|-------|-----|------|------|------------------------------------|
| 882.5228  | 881.5155  | 881.4494  | 75.0   | 129   | 135 | 1    | ---  | K.IDYSKEK.T                        |
| 882.5228  | 881.5155  | 881.4494  | 75.0   | 129   | 135 | 1    | ---  | K.IDYSKEK.T                        |
| 1033.6514 | 1032.6441 | 1032.5716 | 70.2   | 91    | 99  | 1    | ---  | R.GPVNRYRVTK.Y                     |
| 1131.6523 | 1130.6450 | 1130.5866 | 51.7   | 370   | 379 | 1    | ---  | R.EIRDLMAAGR.M                     |
| 1147.6807 | 1146.6734 | 1146.5815 | 80.2   | 370   | 379 | 1    | ---  | R.EIRDLMAAGR.M + Oxidation (M)     |
| 1302.6307 | 1301.6234 | 1301.7303 | -82.12 | 474   | 485 | 1    | ---  | K.TLGATDQTRIVK.E                   |
| 1518.6587 | 1517.6514 | 1517.8011 | -98.62 | 284   | 297 | 0    | ---  | R.ETLMTTGVTPVLEK.V                 |
| 1523.7185 | 1522.7112 | 1522.6861 | 16.5   | 387   | 399 | 0    | ---  | R.DVDPELSEMVDK.FK                  |
| 1900.9595 | 1899.9522 | 1899.9538 | -0.83  | 298   | 315 | 1    | ---  | K.VEPDASNNQSSVKIGLDK.G             |
| 1900.9595 | 1899.9522 | 1899.9538 | -0.81  | 298   | 315 | 1    | ---  | K.VEPDASNNQSSVKIGLDK.G             |
| 2001.9189 | 2000.9116 | 2000.9990 | -43.65 | 136   | 152 | 1    | ---  | K.TLLATDKWEHGVMT.R + Oxidation (M) |

**No match to:** 842.4690, 848.4879, 850.0154, 850.4973, 853.4743, 853.4743, 861.0195, 864.5118, 865.9869, 868.5078, 870.5034, 876.9944, 881.9677, 892.9686, 951.5814, 953.4899, 996.5488, 1017.6209, 1017.6209, 1019.6330, 1045.5168, 1051.6565, 1051.6565, 1136.6420, 1151.6740, 1165.6849, 1165.6849, 1250.6191, 1250.6191, 1287.6302, 1300.7900, 1316.8218, 1334.8221, 1334.8221, 1356.6021, 1421.6768, 1421.6768, 1448.8531, 1454.7075, 1475.6875, 1479.7271, 1491.6775, 1552.7145, 1559.7947, 1567.6738, 1617.9915, 1617.9915, 1707.8094, 1732.0206, 1991.8297, 2012.9465, 2012.9465, 2015.1936, 2044.9634, 2073.0088, 2193.0256, 2211.0200, 2230.1453, 2233.0505, 2239.0674, 2283.0967, 2284.0908, 2305.0867, 2927.5508, 3337.7156

20. [A0A3Q1MD56](#) Mass: 430029 Score: 34 Expect: 48 Matches: 27

Lyosomal-trafficking regulator OS=Bos taurus OX=9913 GN=LYST PE=4 SV=1

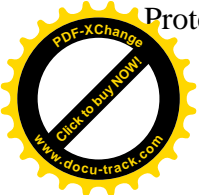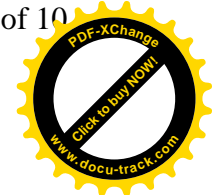

| Observed                                                                                                                                                                                                                                                                                                                                                                                                                                                                                                                                    | Mr(expt)  | Mr(calc)  | ppm    | Start | End | Miss | Ions | Peptide                                 |
|---------------------------------------------------------------------------------------------------------------------------------------------------------------------------------------------------------------------------------------------------------------------------------------------------------------------------------------------------------------------------------------------------------------------------------------------------------------------------------------------------------------------------------------------|-----------|-----------|--------|-------|-----|------|------|-----------------------------------------|
| 842.4690                                                                                                                                                                                                                                                                                                                                                                                                                                                                                                                                    | 841.4617  | 841.4545  | 8.57   | 86    | -   | 92   | 0    | K.IPVQEEK.A                             |
| 853.4743                                                                                                                                                                                                                                                                                                                                                                                                                                                                                                                                    | 852.4670  | 852.4164  | 59.4   | 2381  | -   | 2387 | 0    | K.NMGLFQK.W + Oxidation (M)             |
| 853.4743                                                                                                                                                                                                                                                                                                                                                                                                                                                                                                                                    | 852.4670  | 852.4164  | 59.4   | 2381  | -   | 2387 | 0    | K.NMGLFQK.W + Oxidation (M)             |
| 1017.6209                                                                                                                                                                                                                                                                                                                                                                                                                                                                                                                                   | 1016.6136 | 1016.5754 | 37.6   | 1034  | -   | 1042 | 0    | K.EDLLSLTVK.I                           |
| 1017.6209                                                                                                                                                                                                                                                                                                                                                                                                                                                                                                                                   | 1016.6136 | 1016.5754 | 37.6   | 1034  | -   | 1042 | 0    | K.EDLLSLTVK.I                           |
| 1019.6330                                                                                                                                                                                                                                                                                                                                                                                                                                                                                                                                   | 1018.6257 | 1018.5308 | 93.2   | 149   | -   | 156  | 1    | K.TTHRYSVR.D                            |
| 1045.5168                                                                                                                                                                                                                                                                                                                                                                                                                                                                                                                                   | 1044.5095 | 1044.5175 | -7.64  | 982   | -   | 990  | 0    | R.LGGFQVCHK.L                           |
| 1250.6191                                                                                                                                                                                                                                                                                                                                                                                                                                                                                                                                   | 1249.6118 | 1249.5840 | 22.3   | 3234  | -   | 3243 | 0    | R.TFHSNTNTWR.L                          |
| 1250.6191                                                                                                                                                                                                                                                                                                                                                                                                                                                                                                                                   | 1249.6119 | 1249.7044 | -74.03 | 184   | -   | 193  | 1    | R.RSHVLQHFVK.Q                          |
| 1300.7900                                                                                                                                                                                                                                                                                                                                                                                                                                                                                                                                   | 1299.7827 | 1299.6922 | 69.7   | 1043  | -   | 1054 | 0    | K.IDPTPTLSSLK.K                         |
| 1302.6307                                                                                                                                                                                                                                                                                                                                                                                                                                                                                                                                   | 1301.6234 | 1301.6993 | -58.27 | 3284  | -   | 3294 | 0    | R.VNHVNLPPWAR.N                         |
| 1316.8218                                                                                                                                                                                                                                                                                                                                                                                                                                                                                                                                   | 1315.8145 | 1315.7724 | 32.0   | 2606  | -   | 2616 | 1    | R.LQRLTVFAVNR.I                         |
| 1334.8221                                                                                                                                                                                                                                                                                                                                                                                                                                                                                                                                   | 1333.8148 | 1333.6911 | 92.7   | 1351  | -   | 1361 | 0    | R.TCSEELTLLR.I                          |
| 1334.8221                                                                                                                                                                                                                                                                                                                                                                                                                                                                                                                                   | 1333.8149 | 1333.6911 | 92.8   | 1351  | -   | 1361 | 0    | R.TCSEELTLLR.I                          |
| 1448.8531                                                                                                                                                                                                                                                                                                                                                                                                                                                                                                                                   | 1447.8458 | 1447.7168 | 89.1   | 2827  | -   | 2838 | 0    | K.TVNNNQSLFQR.L                         |
| 1518.6587                                                                                                                                                                                                                                                                                                                                                                                                                                                                                                                                   | 1517.6514 | 1517.6966 | -29.79 | 2575  | -   | 2587 | 0    | R.SVASDELHVMQR.R + Oxidation (M)        |
| 1523.7185                                                                                                                                                                                                                                                                                                                                                                                                                                                                                                                                   | 1522.7112 | 1522.8429 | -86.45 | 2560  | -   | 2572 | 1    | R.KFLLAQTDSSLK.M + Oxidation (M)        |
| 1559.7947                                                                                                                                                                                                                                                                                                                                                                                                                                                                                                                                   | 1558.7874 | 1558.8541 | -42.79 | 1617  | -   | 1629 | 1    | R.KPDVTLDFMLPRK.T                       |
| 1707.8094                                                                                                                                                                                                                                                                                                                                                                                                                                                                                                                                   | 1706.8021 | 1706.7278 | 43.5   | 1011  | -   | 1024 | 1    | K.EGDRTMNEQDLNR.I + Oxidation (M)       |
| 1732.0206                                                                                                                                                                                                                                                                                                                                                                                                                                                                                                                                   | 1731.0133 | 1730.9607 | 30.4   | 3417  | -   | 3431 | 1    | K.EITYSPSLWIKGLK.W                      |
| 1900.9595                                                                                                                                                                                                                                                                                                                                                                                                                                                                                                                                   | 1899.9522 | 1900.0088 | -29.78 | 2983  | -   | 3000 | 1    | R.CISVAPSRETAGEALLGK.C                  |
| 1900.9595                                                                                                                                                                                                                                                                                                                                                                                                                                                                                                                                   | 1899.9522 | 1900.0088 | -29.76 | 2983  | -   | 3000 | 1    | R.CISVAPSRETAGEALLGK.C                  |
| 2193.0256                                                                                                                                                                                                                                                                                                                                                                                                                                                                                                                                   | 2192.0183 | 2192.0406 | -10.14 | 2767  | -   | 2785 | 0    | K.DELTEEELDTAELLMNALK.L + Oxidation (M) |
| 2211.0200                                                                                                                                                                                                                                                                                                                                                                                                                                                                                                                                   | 2210.0127 | 2210.0098 | 1.33   | 2364  | -   | 2380 | 1    | K.YMCTLKFCIFDLEVDK.N                    |
| 2230.1453                                                                                                                                                                                                                                                                                                                                                                                                                                                                                                                                   | 2229.1380 | 2229.1059 | 14.4   | 1015  | -   | 1033 | 1    | R.TMNEQDLNRISQPEITVK.E                  |
| 2233.0505                                                                                                                                                                                                                                                                                                                                                                                                                                                                                                                                   | 2232.0432 | 2232.0595 | -7.30  | 2370  | -   | 2387 | 1    | K.FECIFDLEVDK.NMGLFQK.W                 |
| 2927.5508                                                                                                                                                                                                                                                                                                                                                                                                                                                                                                                                   | 2926.5435 | 2926.4600 | 28.5   | 2944  | -   | 2969 | 1    | K.SEDVVKKPLSYLFEDKTHSSFSSTVK.D          |
| No match to: 848.4879, 850.0154, 850.4973, 861.0195, 864.5118, 865.9869, 868.5078, 870.5034, 876.9944, 881.9677, 882.5228, 882.5228, 892.9686, 951.5814, 953.4899, 996.5488, 1033.6514, 1051.6565, 1051.6565, 1131.6523, 1136.6420, 1147.6807, 1151.6740, 1165.6849, 1287.6302, 1356.6021, 1421.6768, 1421.6768, 1454.7075, 1475.6875, 1479.7271, 1491.6775, 1552.7145, 1567.6738, 1617.9915, 1617.9915, 1991.8297, 2001.9189, 2012.9465, 2012.9465, 2015.1936, 2044.9634, 2073.0088, 2239.0674, 2283.0967, 2284.0908, 2305.0867, 3337.7156 |           |           |        |       |     |      |      |                                         |

21. [A0A4W2E9U7](#) Mass: 76824 Score: 34 Expect: 52 Matches: 12

Nibrin OS=Bos indicus x Bos taurus OX=30522 GN=NBEN PE=4 SV=1

| Observed                                                                                                                                                                                                                                                                                                                                                                                                                                                                                                                                                                                                                                                                                              | Mr(expt)  | Mr(calc)  | ppm    | Start | End | Miss | Ions | Peptide                                 |
|-------------------------------------------------------------------------------------------------------------------------------------------------------------------------------------------------------------------------------------------------------------------------------------------------------------------------------------------------------------------------------------------------------------------------------------------------------------------------------------------------------------------------------------------------------------------------------------------------------------------------------------------------------------------------------------------------------|-----------|-----------|--------|-------|-----|------|------|-----------------------------------------|
| 850.4973                                                                                                                                                                                                                                                                                                                                                                                                                                                                                                                                                                                                                                                                                              | 849.4900  | 849.4232  | 78.6   | 547   | -   | 553  | 0    | K.ESLWSTK.E                             |
| 951.5814                                                                                                                                                                                                                                                                                                                                                                                                                                                                                                                                                                                                                                                                                              | 950.5741  | 950.5073  | 70.3   | 457   | -   | 464  | 0    | K.SLTENLK.S                             |
| 1131.6523                                                                                                                                                                                                                                                                                                                                                                                                                                                                                                                                                                                                                                                                                             | 1130.6450 | 1130.6118 | 29.4   | 1     | -   | 10   | 0    | -.MQNGLSQILK.S                          |
| 1147.6807                                                                                                                                                                                                                                                                                                                                                                                                                                                                                                                                                                                                                                                                                             | 1146.6734 | 1146.6067 | 58.2   | 1     | -   | 10   | 0    | -.MQNGLSQILK.S + Oxidation (M)          |
| 1316.8218                                                                                                                                                                                                                                                                                                                                                                                                                                                                                                                                                                                                                                                                                             | 1315.8145 | 1315.6925 | 92.8   | 15    | -   | 25   | 1    | R.VTFGVFESKFR.V                         |
| 1421.6768                                                                                                                                                                                                                                                                                                                                                                                                                                                                                                                                                                                                                                                                                             | 1420.6695 | 1420.7344 | -45.70 | 311   | -   | 322  | 1    | K.CRILSQETSTVK.K                        |
| 1421.6768                                                                                                                                                                                                                                                                                                                                                                                                                                                                                                                                                                                                                                                                                             | 1420.6695 | 1420.7344 | -45.67 | 311   | -   | 322  | 1    | K.CRILSQETSTVK.K                        |
| 1479.7271                                                                                                                                                                                                                                                                                                                                                                                                                                                                                                                                                                                                                                                                                             | 1478.7198 | 1478.7518 | -21.60 | 374   | -   | 385  | 1    | R.DYFQPLTSPQKR.E                        |
| 1991.8297                                                                                                                                                                                                                                                                                                                                                                                                                                                                                                                                                                                                                                                                                             | 1990.8224 | 1990.8612 | -19.46 | 554   | -   | 570  | 0    | K.ELSNCELQDQDEMLPK.K                    |
| 2012.9465                                                                                                                                                                                                                                                                                                                                                                                                                                                                                                                                                                                                                                                                                             | 2011.9392 | 2011.9231 | 8.02   | 26    | -   | 43   | 0    | R.VEYEPVLVACSSCLDVSGK.T                 |
| 2012.9465                                                                                                                                                                                                                                                                                                                                                                                                                                                                                                                                                                                                                                                                                             | 2011.9393 | 2011.9231 | 8.04   | 26    | -   | 43   | 0    | R.VEYEPVLVACSSCLDVSGK.T                 |
| 2211.0200                                                                                                                                                                                                                                                                                                                                                                                                                                                                                                                                                                                                                                                                                             | 2210.0127 | 2210.0559 | -19.53 | 402   | -   | 420  | 0    | R.METSCSLLEQTQPTTSLIR.K + Oxidation (M) |
| No match to: 842.4690, 848.4879, 850.0154, 853.4743, 853.4743, 861.0195, 864.5118, 865.9869, 868.5078, 870.5034, 876.9944, 881.9677, 882.5228, 892.9686, 953.4899, 996.5488, 1017.6209, 1017.6209, 1019.6330, 1033.6514, 1045.5168, 1051.6565, 1051.6565, 1136.6420, 1151.6740, 1165.6849, 1165.6849, 1250.6191, 1250.6191, 1287.6302, 1300.7900, 1302.6307, 1334.8221, 1334.8221, 1356.6021, 1448.8531, 1454.7075, 1475.6875, 1491.6775, 1518.6587, 1523.7185, 1552.7145, 1559.7947, 1567.6738, 1617.9915, 1707.8094, 1732.0206, 1900.9595, 1900.9595, 2001.9189, 2015.1936, 2044.9634, 2073.0088, 2193.0256, 2230.1453, 2233.0505, 2239.0674, 2283.0967, 2284.0908, 2305.0867, 2927.5508, 3337.7156 |           |           |        |       |     |      |      |                                         |

22. [E1BNC9](#) Mass: 124764 Score: 32 Expect: 77 Matches: 15

Ankyrin 3 OS=Bos taurus OX=9913 GN=ANK3 PE=4 SV=3

| Observed                                                                                                                                                                                                                                                                                                                                                                                                                                                                                                                                                                                                                                                              | Mr(expt)  | Mr(calc)  | ppm    | Start | End | Miss | Ions | Peptide                            |
|-----------------------------------------------------------------------------------------------------------------------------------------------------------------------------------------------------------------------------------------------------------------------------------------------------------------------------------------------------------------------------------------------------------------------------------------------------------------------------------------------------------------------------------------------------------------------------------------------------------------------------------------------------------------------|-----------|-----------|--------|-------|-----|------|------|------------------------------------|
| 842.4690                                                                                                                                                                                                                                                                                                                                                                                                                                                                                                                                                                                                                                                              | 841.4617  | 841.4004  | 72.9   | 1096  | -   | 1102 | 1    | K.GEAYKMK.T + Oxidation (M)        |
| 953.4899                                                                                                                                                                                                                                                                                                                                                                                                                                                                                                                                                                                                                                                              | 952.4826  | 952.4410  | 43.7   | 156   | -   | 163  | 1    | R.GSRHHGMR.I + Oxidation (M)       |
| 996.5488                                                                                                                                                                                                                                                                                                                                                                                                                                                                                                                                                                                                                                                              | 995.5415  | 995.5651  | -23.71 | 861   | -   | 869  | 0    | K.DVKPAEPLK.Q                      |
| 1302.6307                                                                                                                                                                                                                                                                                                                                                                                                                                                                                                                                                                                                                                                             | 1301.6234 | 1301.6510 | -21.19 | 1069  | -   | 1080 | 1    | K.MSRTSPADGKPR.L                   |
| 1316.8218                                                                                                                                                                                                                                                                                                                                                                                                                                                                                                                                                                                                                                                             | 1315.8145 | 1315.7136 | 76.7   | 354   | -   | 365  | 0    | K.ATFSPIVTVPEPR.R                  |
| 1334.8221                                                                                                                                                                                                                                                                                                                                                                                                                                                                                                                                                                                                                                                             | 1333.8148 | 1333.7089 | 79.4   | 692   | -   | 704  | 0    | K.NATTDALTSVLTK.I                  |
| 1334.8221                                                                                                                                                                                                                                                                                                                                                                                                                                                                                                                                                                                                                                                             | 1333.8149 | 1333.7089 | 79.4   | 692   | -   | 704  | 0    | K.NATTDALTSVLTK.I                  |
| 1356.6021                                                                                                                                                                                                                                                                                                                                                                                                                                                                                                                                                                                                                                                             | 1355.5948 | 1355.6140 | -14.13 | 428   | -   | 439  | 0    | K.DCVSFTTNVSAR.F                   |
| 1491.6775                                                                                                                                                                                                                                                                                                                                                                                                                                                                                                                                                                                                                                                             | 1490.6702 | 1490.7360 | -44.14 | 90    | -   | 102  | 0    | R.DSMIEELLVPSK.E                   |
| 1518.6587                                                                                                                                                                                                                                                                                                                                                                                                                                                                                                                                                                                                                                                             | 1517.6514 | 1517.7667 | -75.96 | 536   | -   | 548  | 0    | K.GGQQQLVFNFYAFK.E                 |
| 1523.7185                                                                                                                                                                                                                                                                                                                                                                                                                                                                                                                                                                                                                                                             | 1522.7112 | 1522.7259 | -9.61  | 90    | -   | 102  | 0    | R.DSMIEELLVPSK.E + 2 Oxidation (M) |
| 1559.7947                                                                                                                                                                                                                                                                                                                                                                                                                                                                                                                                                                                                                                                             | 1558.7874 | 1558.8005 | -8.37  | 2     | -   | 15   | 1    | M.TGGAVFSPDRHIFR.K                 |
| 2001.9189                                                                                                                                                                                                                                                                                                                                                                                                                                                                                                                                                                                                                                                             | 2000.9116 | 2000.8608 | 25.4   | 617   | -   | 633  | 0    | R.YSYLTEPGMSPQSPCER.T              |
| 2012.9465                                                                                                                                                                                                                                                                                                                                                                                                                                                                                                                                                                                                                                                             | 2011.9392 | 2011.9157 | 11.7   | 966   | -   | 982  | 1    | R.LDDSPDQCRDSITSYLK.G              |
| 2012.9465                                                                                                                                                                                                                                                                                                                                                                                                                                                                                                                                                                                                                                                             | 2011.9393 | 2011.9157 | 11.7   | 966   | -   | 982  | 1    | R.LDDSPDQCRDSITSYLK.G              |
| No match to: 848.4879, 850.0154, 850.4973, 853.4743, 853.4743, 861.0195, 864.5118, 865.9869, 868.5078, 870.5034, 876.9944, 881.9677, 882.5228, 892.9686, 951.5814, 1017.6209, 1017.6209, 1019.6330, 1033.6514, 1045.5168, 1051.6565, 1131.6523, 1136.6420, 1147.6807, 1151.6740, 1165.6849, 1165.6849, 1250.6191, 1250.6191, 1287.6302, 1300.7900, 1421.6768, 1421.6768, 1448.8531, 1454.7075, 1475.6875, 1479.7271, 1552.7145, 1567.6738, 1617.9915, 1617.9915, 1707.8094, 1732.0206, 1900.9595, 1900.9595, 1991.8297, 2015.1936, 2044.9634, 2073.0088, 2193.0256, 2211.0200, 2230.1453, 2233.0505, 2239.0674, 2283.0967, 2284.0908, 2305.0867, 2927.5508, 3337.7156 |           |           |        |       |     |      |      |                                    |

23. [G8JKV3](#) Mass: 11943 Score: 32 Expect: 91 Matches: 4

Glutaredoxin domain-containing protein OS=Bos taurus OX=9913 PE=4 SV=1

| Observed                                                                                                                                                                                                                                                                                                                                                                                                                                                                                                                                                                                                       | Mr(expt)  | Mr(calc)  | ppm    | Start | End | Miss | Ions | Peptide                 |
|----------------------------------------------------------------------------------------------------------------------------------------------------------------------------------------------------------------------------------------------------------------------------------------------------------------------------------------------------------------------------------------------------------------------------------------------------------------------------------------------------------------------------------------------------------------------------------------------------------------|-----------|-----------|--------|-------|-----|------|------|-------------------------|
| 864.5118                                                                                                                                                                                                                                                                                                                                                                                                                                                                                                                                                                                                       | 863.5045  | 863.4501  | 63.0   | 2     | -   | 9    | 0    | M.AQAFVNSK.I            |
| 870.5034                                                                                                                                                                                                                                                                                                                                                                                                                                                                                                                                                                                                       | 869.4961  | 869.5334  | -42.91 | 99    | -   | 106  | 1    | R.LKQIGALQ.-            |
| 1518.6587                                                                                                                                                                                                                                                                                                                                                                                                                                                                                                                                                                                                      | 1517.6514 | 1517.8024 | -99.48 | 1     | -   | 14   | 1    | -.MAQAFVNSKIQPGK.V      |
| 2305.0867                                                                                                                                                                                                                                                                                                                                                                                                                                                                                                                                                                                                      | 2304.0794 | 2304.0627 | 7.25   | 73    | -   | 92   | 0    | R.VFIGQECIGGCTDLVNTHR.G |
| No match to: 842.4690, 848.4879, 850.0154, 850.4973, 853.4743, 853.4743, 861.0195, 865.9869, 868.5078, 876.9944, 881.9677, 882.5228, 892.9686, 951.5814, 953.4899, 996.5488, 1017.6209, 1017.6209, 1019.6330, 1033.6514, 1045.5168, 1051.6565, 1051.6565, 1131.6523, 1136.6420, 1147.6807, 1151.6740, 1165.6849, 1165.6849, 1250.6191, 1250.6191, 1287.6302, 1300.7900, 1302.6307, 1316.8218, 1334.8221, 1334.8221, 1356.6021, 1421.6768, 1421.6768, 1448.8531, 1454.7075, 1475.6875, 1479.7271, 1491.6775, 1523.7185, 1552.7145, 1559.7947, 1567.6738, 1617.9915, 1617.9915, 1707.8094, 1732.0206, 1900.9595, |           |           |        |       |     |      |      |                         |





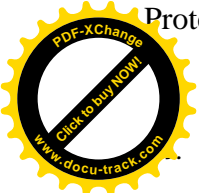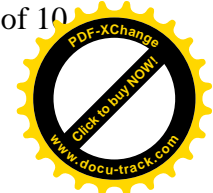

**D8V071** Mass: 35943 Score: 30 Expect: 1.5e+002 Matches: 7  
 Phosphoprotein OS=Tibrogargan virus (strain CS132) OX=1559361 GN=P PE=3 SV=1

| Observed  | Mr(expt)  | Mr(calc)  | ppm    | Start | End | Miss | Ions | Peptide                           |
|-----------|-----------|-----------|--------|-------|-----|------|------|-----------------------------------|
| 951.5814  | 950.5741  | 950.4933  | 85.0   | 52    | -   | 58   | 1    | R.ELNYRTR.A                       |
| 996.5488  | 995.5415  | 995.5222  | 19.4   | 295   | -   | 303  | 1    | K.ASGIYRAMK.L                     |
| 1250.6191 | 1249.6118 | 1249.6302 | -14.74 | 42    | -   | 51   | 1    | K.QDLKEFLDSR.E                    |
| 1250.6191 | 1249.6119 | 1249.6302 | -14.71 | 42    | -   | 51   | 1    | K.QDLKEFLDSR.E                    |
| 1518.6587 | 1517.6514 | 1517.7031 | -34.08 | 85    | -   | 97   | 1    | K.MEESSLHDDKAIK.Q + Oxidation (M) |
| 1523.7185 | 1522.7112 | 1522.7092 | 1.31   | 185   | -   | 196  | 1    | K.DNQGYFYPTKK.W                   |
| 2044.9634 | 2043.9561 | 2044.0185 | -30.51 | 111   | -   | 130  | 1    | R.SPNANSIGGQSVIKDVSSER.K          |

No match to: 842.4690, 848.4879, 850.0154, 850.4973, 853.4743, 853.4743, 861.0195, 864.5118, 865.9869, 868.5078, 870.5034, 876.9944, 881.9677, 882.5228, 882.5228, 892.9686, 953.4899, 1017.6209, 1017.6209, 1019.6330, 1033.6514, 1045.5168, 1051.6565, 1051.6565, 1131.6523, 1136.6420, 1147.6807, 1151.6740, 1165.6849, 1165.6849, 1287.6302, 1300.7900, 1302.6307, 1316.8218, 1334.8221, 1334.8221, 1356.6021, 1421.6768, 1421.6768, 1448.8531, 1454.7075, 1475.6875, 1479.7271, 1491.6775, 1552.7145, 1559.7947, 1567.6738, 1617.9915, 1707.8094, 1732.0206, 1900.9595, 1900.9595, 1991.8297, 2001.9189, 2012.9465, 2012.9465, 2015.1936, 2073.0088, 2193.0256, 2211.0200, 2230.1453, 2233.0505, 2239.0674, 2283.0967, 2284.0908, 2305.0867, 2927.5508, 3337.7156

30. **A0A4W2DGE8** Mass: 25670 Score: 29 Expect: 1.5e+002 Matches: 7  
 Peptidylprolyl isomerase OS=Bos indicus x Bos taurus OX=30522 GN=FKBP11 PE=4 SV=1

| Observed  | Mr(expt)  | Mr(calc)  | ppm    | Start | End | Miss | Ions | Peptide                         |
|-----------|-----------|-----------|--------|-------|-----|------|------|---------------------------------|
| 1165.6849 | 1164.6776 | 1164.7343 | -48.62 | 2     | -   | 11   | 0    | M.TLRPSLLPLR.L                  |
| 1165.6849 | 1164.6777 | 1164.7343 | -48.59 | 2     | -   | 11   | 0    | M.TLRPSLLPLR.L                  |
| 1250.6191 | 1249.6118 | 1249.6891 | -61.83 | 172   | -   | 182  | 0    | R.LSTHALRPEAR.R                 |
| 1250.6191 | 1249.6119 | 1249.6891 | -61.79 | 172   | -   | 182  | 0    | R.LSTHALRPEAR.R                 |
| 1300.7900 | 1299.7827 | 1299.6717 | 85.4   | 138   | -   | 148  | 1    | R.NLCQGSQRLPK.V                 |
| 1518.6587 | 1517.6514 | 1517.7020 | -33.33 | 214   | -   | 224  | 1    | K.VMQYCHPHFRK.T + Oxidation (M) |
| 2044.9634 | 2043.9561 | 2044.1205 | -80.39 | 74    | -   | 91   | 1    | R.IFDTSLTRDPLVIELGQK.Q          |

No match to: 842.4690, 848.4879, 850.0154, 850.4973, 853.4743, 853.4743, 861.0195, 864.5118, 865.9869, 868.5078, 870.5034, 876.9944, 881.9677, 882.5228, 882.5228, 892.9686, 951.5814, 953.4899, 996.5488, 1017.6209, 1017.6209, 1019.6330, 1033.6514, 1045.5168, 1051.6565, 1051.6565, 1131.6523, 1136.6420, 1147.6807, 1151.6740, 1287.6302, 1302.6307, 1316.8218, 1334.8221, 1334.8221, 1356.6021, 1421.6768, 1421.6768, 1448.8531, 1454.7075, 1475.6875, 1479.7271, 1491.6775, 1523.7185, 1552.7145, 1559.7947, 1567.6738, 1617.9915, 1617.9915, 1707.8094, 1732.0206, 1900.9595, 1900.9595, 1991.8297, 2001.9189, 2012.9465, 2012.9465, 2015.1936, 2073.0088, 2193.0256, 2211.0200, 2230.1453, 2233.0505, 2239.0674, 2283.0967, 2284.0908, 2305.0867, 2927.5508, 3337.7156

## Search Parameters

Type of search : Sequence Query  
 Enzyme : Trypsin  
 Fixed modifications : [Carbamidomethyl \(C\)](#)  
 Variable modifications : [Oxidation \(M\)](#)  
 Mass values : Monoisotopic  
 Protein Mass : Unrestricted  
 Peptide Mass Tolerance :  $\pm 100$  ppm  
 Fragment Mass Tolerance :  $\pm 0.3$  Da  
 Max Missed Cleavages : 1  
 Instrument type : MALDI-TOF-TOF

Query1 (842.4690,1+): <no title>  
 Query2 (848.4879,1+): <no title>  
 Query3 (850.0154,1+): <no title>  
 Query4 (850.4973,1+): <no title>  
 Query5 (853.4743,1+): <no title>  
 Query6 (853.4743,1+): Locus:1..14.0.10  
 Query7 (861.0195,1+): <no title>  
 Query8 (864.5118,1+): <no title>  
 Query9 (865.9869,1+): <no title>  
 Query10 (868.5078,1+): <no title>  
 Query11 (870.5034,1+): <no title>  
 Query12 (876.9944,1+): <no title>  
 Query13 (881.9677,1+): <no title>  
 Query14 (882.5228,1+): Locus:1..14.0.7  
 Query15 (882.5228,1+): <no title>  
 Query16 (892.9686,1+): <no title>  
 Query17 (951.5814,1+): <no title>  
 Query18 (953.4899,1+): <no title>  
 Query19 (996.5488,1+): <no title>  
 Query20 (1017.6209,1+): <no title>  
 Query21 (1017.6209,1+): Locus:1..14.0.9  
 Query22 (1019.6330,1+): <no title>  
 Query23 (1033.6514,1+): <no title>  
 Query24 (1045.5168,1+): <no title>  
 Query25 (1051.6565,1+): Locus:1..14.0.1  
 Query26 (1051.6565,1+): <no title>  
 Query27 (1131.6523,1+): <no title>  
 Query28 (1136.6420,1+): <no title>  
 Query29 (1147.6807,1+): <no title>  
 Query30 (1151.6740,1+): <no title>  
 Query31 (1165.6849,1+): <no title>  
 Query32 (1165.6849,1+): Locus:1..14.0.8  
 Query33 (1250.6191,1+): <no title>  
 Query34 (1250.6191,1+): Locus:1..14.0.11  
 Query35 (1287.6302,1+): <no title>  
 Query36 (1300.7900,1+): <no title>  
 Query37 (1302.6307,1+): <no title>  
 Query38 (1316.8218,1+): <no title>  
 Query39 (1334.8221,1+): <no title>  
 Query40 (1334.8221,1+): Locus:1..14.0.2  
 Query41 (1356.6021,1+): <no title>  
 Query42 (1421.6768,1+): Locus:1..14.0.3  
 Query43 (1421.6768,1+): <no title>  
 Query44 (1448.8531,1+): <no title>  
 Query45 (1454.7075,1+): <no title>  
 Query46 (1475.6875,1+): <no title>  
 Query47 (1479.7271,1+): <no title>  
 Query48 (1491.6775,1+): <no title>  
 Query49 (1518.6587,1+): <no title>  
 Query50 (1523.7185,1+): <no title>  
 Query51 (1552.7145,1+): <no title>  
 Query52 (1559.7947,1+): <no title>

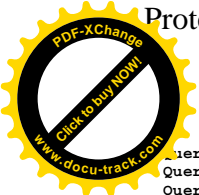

Query53 (1567.6738,1+): <no title>  
Query54 (1617.9915,1+): Locus:1..14.0.6  
Query55 (1617.9915,1+): <no title>  
Query56 (1707.8094,1+): <no title>  
Query57 (1732.0206,1+): <no title>  
Query58 (1900.9595,1+): Locus:1..14.0.4  
Query59 (1900.9595,1+): <no title>  
Query60 (1991.8297,1+): <no title>  
Query61 (2001.9189,1+): <no title>  
Query62 (2012.9465,1+): <no title>  
Query63 (2012.9465,1+): Locus:1..14.0.5  
Query64 (2015.1936,1+): <no title>  
Query65 (2044.9634,1+): <no title>  
Query66 (2073.0088,1+): <no title>  
Query67 (2193.0256,1+): <no title>  
Query68 (2211.0200,1+): <no title>  
Query69 (2230.1453,1+): <no title>  
Query70 (2233.0505,1+): <no title>  
Query71 (2239.0674,1+): <no title>  
Query72 (2283.0967,1+): <no title>  
Query73 (2284.0908,1+): <no title>  
Query74 (2305.0867,1+): <no title>  
Query75 (2927.5508,1+): <no title>  
Query76 (3337.7156,1+): <no title>

Mascot: <http://www.matrixscience.com/>
