# Supplementary material for: Alpha-2-Macroglobulin as a New Promising Biomarker Improving the Diagnostic Sensitivity of Bovine Paratuberculosis
Source: Frontiers journal article supplement (doi:10.3389/fvets.2021.637716), 2021-03-05
Supplement: Data_Sheet_1.zip [file Data_Sheet_1.zip]

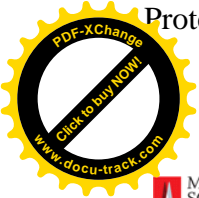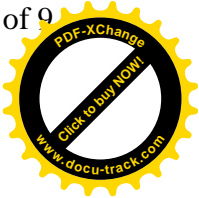

# MASCOT Search Results

User :  
Email :  
Search title : BAEDW\2020\_3\_5\2020\_3\_5\MSMS 14\N12  
Database : Uniprot\_bovine\_bovine\_20200316 (134392 sequences; 76244912 residues)  
Timestamp : 31 Mar 2020 at 01:08:42 GMT  
Warning : A Peptide summary report will usually give a much clearer picture of MS/MS search results.  
Top Score : 74 for F1MMD7, Inter-alpha-trypsin inhibitor heavy chain H4 OS=Bos taurus OX=9913 GN=ITIH4 PE=4 SV=3

## Mascot Score Histogram

Protein score is  $-10 \cdot \log(P)$ , where P is the probability that the observed match is a random event.  
Protein scores greater than 64 are significant ( $p < 0.05$ ).  
Protein scores are derived from ion scores as a non-probabilistic basis for ranking protein hits.

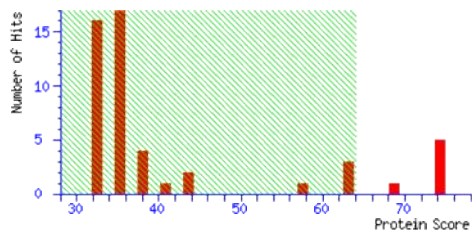

## Protein Summary Report

Format As  [Help](#)  
Significance threshold  $p < 0.05$  Max. number of hits   
Preferred taxonomy

## Index

| Accession                      | Mass   | Score | Description                                                                                              |
|--------------------------------|--------|-------|----------------------------------------------------------------------------------------------------------|
| 1. <a href="#">F1MMD7</a>      | 101620 | 74    | Inter-alpha-trypsin inhibitor heavy chain H4 OS=Bos taurus OX=9913 GN=ITIH4 PE=4 SV=3                    |
| 2. <a href="#">A0A4W2C1E9</a>  | 101620 | 74    | Inter-alpha-trypsin inhibitor heavy chain 4 OS=Bos indicus x Bos taurus OX=30522 GN=ITIH4 PE=4 SV=1      |
| 3. <a href="#">Q5EA67</a>      | 101617 | 74    | Inter-alpha (Globulin) inhibitor H4 (Plasma Kallikrein-sensitive glycoprotein) OS=Bos taurus OX=9913 GN= |
| 4. <a href="#">Q3T052</a>      | 101620 | 74    | Inter-alpha-trypsin inhibitor heavy chain H4 OS=Bos taurus OX=9913 GN=ITIH4 PE=1 SV=1                    |
| 5. <a href="#">A0A3Q1MGQ6</a>  | 103466 | 74    | Inter-alpha-trypsin inhibitor heavy chain H4 OS=Bos taurus OX=9913 GN=ITIH4 PE=4 SV=1                    |
| 6. <a href="#">A0A4W2HB77</a>  | 101584 | 68    | Inter-alpha-trypsin inhibitor heavy chain 4 OS=Bos indicus x Bos taurus OX=30522 GN=ITIH4 PE=4 SV=1      |
| 7. <a href="#">A0A3Q1MA31</a>  | 99755  | 64    | Inter-alpha-trypsin inhibitor heavy chain H4 OS=Bos taurus OX=9913 GN=ITIH4 PE=4 SV=1                    |
| 8. <a href="#">A0A4W2DPE8</a>  | 99755  | 64    | Inter-alpha-trypsin inhibitor heavy chain 4 OS=Bos indicus x Bos taurus OX=30522 GN=ITIH4 PE=4 SV=1      |
| 9. <a href="#">A0A3Q1LZ09</a>  | 100847 | 63    | Inter-alpha-trypsin inhibitor heavy chain H4 OS=Bos taurus OX=9913 GN=ITIH4 PE=4 SV=1                    |
| 10. <a href="#">A0A4W2F8Z8</a> | 99718  | 59    | Inter-alpha-trypsin inhibitor heavy chain 4 OS=Bos indicus x Bos taurus OX=30522 GN=ITIH4 PE=4 SV=1      |
| 11. <a href="#">A0A4W2DTX3</a> | 38736  | 42    | Glutathione S-transferase omega 1 OS=Bos indicus x Bos taurus OX=30522 GN=GSTO1 PE=3 SV=1                |
| 12. <a href="#">A0A4W2FV73</a> | 38767  | 42    | Glutathione S-transferase omega 1 OS=Bos indicus x Bos taurus OX=30522 GN=GSTO1 PE=3 SV=1                |
| 13. <a href="#">A0A3Q1LRF3</a> | 39309  | 41    | Uncharacterized protein OS=Bos taurus OX=9913 PE=4 SV=1                                                  |
| 14. <a href="#">A0A4W2F6I5</a> | 532453 | 39    | Plectin OS=Bos indicus x Bos taurus OX=30522 GN=PLEC PE=4 SV=1                                           |
| 15. <a href="#">A0A4W2FGN9</a> | 123016 | 39    | Coiled-coil domain containing 150 OS=Bos indicus x Bos taurus OX=30522 GN=CCDC150 PE=4 SV=1              |
| 16. <a href="#">A0A4W2DYM0</a> | 53619  | 38    | NAD-dependent protein lipoamidase sirtuin-4, mitochondrial OS=Bos indicus x Bos taurus OX=30522 GN=SIRT  |
| 17. <a href="#">A0A4W2GWY7</a> | 132560 | 38    | Euchromatic histone lysine methyltransferase 1 OS=Bos indicus x Bos taurus OX=30522 GN=EHMT1 PE=4 SV=1   |
| 18. <a href="#">A0A4W2E8Y3</a> | 132257 | 36    | Euchromatic histone lysine methyltransferase 1 OS=Bos indicus x Bos taurus OX=30522 GN=EHMT1 PE=4 SV=1   |
| 19. <a href="#">A0A3Q1LPD0</a> | 132257 | 36    | Euchromatic histone lysine methyltransferase 1 OS=Bos taurus OX=9913 GN=EHMT1 PE=4 SV=1                  |
| 20. <a href="#">A0A4W2C1C0</a> | 67085  | 7     | Heparanase 2 (inactive) OS=Bos indicus x Bos taurus OX=30522 GN=HPSE2 PE=4 SV=1                          |
| 21. <a href="#">O46770</a>     | 19686  | 35    | MHC class I heavy chain (Fragment) OS=Bos taurus OX=9913 PE=2 SV=1                                       |
| 22. <a href="#">USTGS8</a>     | 86845  | 34    | CPXV068 protein OS=Cowpox virus OX=10243 GN=CPXV068 PE=4 SV=1                                            |
| 23. <a href="#">A0A4W2CHB4</a> | 38688  | 34    | Glutathione S-transferase omega 1 OS=Bos indicus x Bos taurus OX=30522 GN=GSTO1 PE=3 SV=1                |
| 24. <a href="#">A0A4W2FWN4</a> | 38719  | 34    | Glutathione S-transferase omega 1 OS=Bos indicus x Bos taurus OX=30522 GN=GSTO1 PE=3 SV=1                |
| 25. <a href="#">A0A0K2TTL5</a> | 9022   | 34    | Uncharacterized protein OS=Cowpox virus OX=10243 GN=gCPXV0248 PE=4 SV=1                                  |
| 26. <a href="#">O46724</a>     | 19602  | 34    | MHC class I heavy chain (Fragment) OS=Bos taurus OX=9913 PE=2 SV=1                                       |
| 27. <a href="#">O46765</a>     | 19602  | 34    | MHC class I heavy chain (Fragment) OS=Bos taurus OX=9913 PE=2 SV=1                                       |
| 28. <a href="#">A0A4W2BML3</a> | 25099  | 34    | HESX homeobox 1 OS=Bos indicus x Bos taurus OX=30522 GN=HESX1 PE=4 SV=1                                  |
| 29. <a href="#">A0A4W2E8V9</a> | 138235 | 34    | Euchromatic histone lysine methyltransferase 1 OS=Bos indicus x Bos taurus OX=30522 GN=EHMT1 PE=4 SV=1   |
| 30. <a href="#">A0A3Q1MVR5</a> | 138235 | 34    | Euchromatic histone lysine methyltransferase 1 OS=Bos taurus OX=9913 GN=EHMT1 PE=4 SV=1                  |

## Results List

| 1.                                                                                                                                                                                                                                                                                                                                                    | <a href="#">F1MMD7</a> | Mass: 101620 | Score: 74 | Expect: 0.005 | Matches: 14                             |
|-------------------------------------------------------------------------------------------------------------------------------------------------------------------------------------------------------------------------------------------------------------------------------------------------------------------------------------------------------|------------------------|--------------|-----------|---------------|-----------------------------------------|
| Inter-alpha-trypsin inhibitor heavy chain H4 OS=Bos taurus OX=9913 GN=ITIH4 PE=4 SV=3                                                                                                                                                                                                                                                                 |                        |              |           |               |                                         |
| Observed                                                                                                                                                                                                                                                                                                                                              | Mr(expt)               | Mr(calc)     | ppm       | Start         | End Miss Tons Peptide                   |
| 835.4214                                                                                                                                                                                                                                                                                                                                              | 834.4141               | 834.4422     | -33.63    | 619 - 625     | 0 --- R.VYLGPMR.F                       |
| 853.4803                                                                                                                                                                                                                                                                                                                                              | 852.4730               | 852.3946     | 92.0      | 283 - 290     | 1 --- K.SGSMGRK.I                       |
| 853.4804                                                                                                                                                                                                                                                                                                                                              | 852.4731               | 852.3946     | 92.1      | 283 - 290     | 1 --- K.SGSMGRK.I                       |
| 972.5108                                                                                                                                                                                                                                                                                                                                              | 971.5035               | 971.5400     | -37.52    | 845 - 852     | 0 --- R.LLLQNTDR.F                      |
| 1031.5133                                                                                                                                                                                                                                                                                                                                             | 1030.5060              | 1030.5229    | -16.41    | 430 - 439     | 0 --- K.MALENGGLAR.R                    |
| 1151.6821                                                                                                                                                                                                                                                                                                                                             | 1150.6748              | 1150.5917    | 72.2      | 616 - 625     | 1 --- R.GSRVYLGPMR.F + Oxidation (M)    |
| 1211.5695                                                                                                                                                                                                                                                                                                                                             | 1210.5622              | 1210.6135    | -42.34    | 539 - 547     | 0 --- K.YIFHSPIER.L                     |
| 1349.6478                                                                                                                                                                                                                                                                                                                                             | 1348.6405              | 1348.6987    | -43.13    | 230 - 241     | 0 --- K.QDTVLDGSFIVR.Y                  |
| 1368.6882                                                                                                                                                                                                                                                                                                                                             | 1367.6809              | 1367.7409    | -43.82    | 500 - 511     | 0 --- R.EQSPDVLQAQIR.G                  |
| 1402.7100                                                                                                                                                                                                                                                                                                                                             | 1401.7027              | 1401.7657    | -44.89    | 829 - 841     | 0 --- R.VTIGLLFWDGPGK.G                 |
| 1567.6902                                                                                                                                                                                                                                                                                                                                             | 1566.6829              | 1566.8116    | -82.12    | 800 - 812     | 1 --- K.WKETLYSVMPGLK.V + Oxidation (M) |
| 1581.7833                                                                                                                                                                                                                                                                                                                                             | 1580.7760              | 1580.8450    | -43.62    | 141 - 153     | 0 --- K.VTFELVYEELLAR.H                 |
| 1581.7833                                                                                                                                                                                                                                                                                                                                             | 1580.7761              | 1580.8450    | -43.60    | 141 - 153     | 0 35 K.VTFELVYEELLAR.H                  |
| 1637.8650                                                                                                                                                                                                                                                                                                                                             | 1636.8577              | 1636.9260    | -41.73    | 498 - 511     | 1 --- K.LREQSPDVLQAQIR.G                |
| No match to: 842.4716, 848.4913, 850.5007, 864.5184, 868.5114, 870.5096, 882.5266, 882.5266, 951.5828, 953.4929, 982.5417, 996.5513, 1007.6395, 1017.6248, 1019.6375, 1033.6567, 1033.6567, 1036.5132, 1045.5249, 1051.6622, 1051.6622, 1131.6577, 1133.6731, 1136.6519, 1147.6853, 1165.6888, 1165.6888, 1179.5533, 1194.5757, 1234.7560, 1236.6587, |                        |              |           |               |                                         |

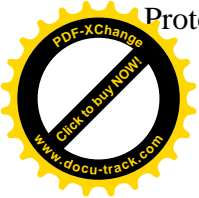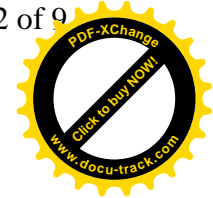

1277.6544, 1279.7057, 1300.7963, 1302.8082, 1316.8273, 1334.8298, 1334.8298, 1383.6498, 1421.6836, 1434.8480, 1448.8584, 1448.8584, 1475.6868, 1479.7338, 1617.9998, 1617.9998, 1707.7130, 1732.0293, 1732.0293, 1734.8334, 1838.8518, 1900.9630, 1901.1735, 1993.8977, 2015.2006, 2184.3567, 2211.0339, 2215.0857, 2283.0969, 2872.3440

2. [A0A4W2C1E9](#) Mass: 101620 Score: 74 Expect: 0.005 Matches: 14

Inter-alpha-trypsin inhibitor heavy chain 4 OS=Bos indicus x Bos taurus OX=30522 GN=ITIH4 PE=4 SV=1

| Observed                                                                                                                                                                                                                                                                                                                                                                                                                                                                                                                                                                                                                                                                                                            | Mr(expt)  | Mr(calc)  | ppm    | Start | End | Miss | Ions | Peptide                           |
|---------------------------------------------------------------------------------------------------------------------------------------------------------------------------------------------------------------------------------------------------------------------------------------------------------------------------------------------------------------------------------------------------------------------------------------------------------------------------------------------------------------------------------------------------------------------------------------------------------------------------------------------------------------------------------------------------------------------|-----------|-----------|--------|-------|-----|------|------|-----------------------------------|
| 835.4214                                                                                                                                                                                                                                                                                                                                                                                                                                                                                                                                                                                                                                                                                                            | 834.4141  | 834.4422  | -33.63 | 619   | 625 | 0    | ---  | R.VYLGPMR.F                       |
| 853.4803                                                                                                                                                                                                                                                                                                                                                                                                                                                                                                                                                                                                                                                                                                            | 852.4730  | 852.3946  | 92.0   | 283   | 290 | 1    | ---  | K.SGSMGGRK.I                      |
| 853.4804                                                                                                                                                                                                                                                                                                                                                                                                                                                                                                                                                                                                                                                                                                            | 852.4731  | 852.3946  | 92.1   | 283   | 290 | 1    | ---  | K.SGSMGGRK.I                      |
| 972.5108                                                                                                                                                                                                                                                                                                                                                                                                                                                                                                                                                                                                                                                                                                            | 971.5035  | 971.5400  | -37.52 | 845   | 852 | 0    | ---  | R.LLLQNTDR.F                      |
| 1031.5133                                                                                                                                                                                                                                                                                                                                                                                                                                                                                                                                                                                                                                                                                                           | 1030.5060 | 1030.5229 | -16.41 | 430   | 439 | 0    | ---  | K.MALENGGLAR.R                    |
| 1151.6821                                                                                                                                                                                                                                                                                                                                                                                                                                                                                                                                                                                                                                                                                                           | 1150.6748 | 1150.5917 | 72.2   | 616   | 625 | 1    | ---  | R.GSRVYLGPMR.F + Oxidation (M)    |
| 1211.5695                                                                                                                                                                                                                                                                                                                                                                                                                                                                                                                                                                                                                                                                                                           | 1210.5622 | 1210.6135 | -42.34 | 539   | 547 | 0    | ---  | K.YIFHSPIER.L                     |
| 1349.6478                                                                                                                                                                                                                                                                                                                                                                                                                                                                                                                                                                                                                                                                                                           | 1348.6405 | 1348.6987 | -43.13 | 230   | 241 | 0    | ---  | K.QDTVLGDSFIVR.Y                  |
| 1368.6882                                                                                                                                                                                                                                                                                                                                                                                                                                                                                                                                                                                                                                                                                                           | 1367.6809 | 1367.7409 | -43.82 | 500   | 511 | 0    | ---  | R.EQSPDVLLAQIR.G                  |
| 1402.7100                                                                                                                                                                                                                                                                                                                                                                                                                                                                                                                                                                                                                                                                                                           | 1401.7027 | 1401.7657 | -44.89 | 829   | 841 | 0    | ---  | R.VTIGLLFWDGPGK.G                 |
| 1567.6902                                                                                                                                                                                                                                                                                                                                                                                                                                                                                                                                                                                                                                                                                                           | 1566.6829 | 1566.8116 | -82.12 | 800   | 812 | 1    | ---  | K.WKETLYSVMPGLK.V + Oxidation (M) |
| 1581.7833                                                                                                                                                                                                                                                                                                                                                                                                                                                                                                                                                                                                                                                                                                           | 1580.7760 | 1580.8450 | -43.62 | 141   | 153 | 0    | ---  | K.VTFELVYEELLAR.H                 |
| 1581.7833                                                                                                                                                                                                                                                                                                                                                                                                                                                                                                                                                                                                                                                                                                           | 1580.7761 | 1580.8450 | -43.60 | 141   | 153 | 0    | 35   | K.VTFELVYEELLAR.H                 |
| 1637.8650                                                                                                                                                                                                                                                                                                                                                                                                                                                                                                                                                                                                                                                                                                           | 1636.8577 | 1636.9260 | -41.73 | 498   | 511 | 1    | ---  | K.LREQSPDVLLAQIR.G                |
| No match to: 842.4716, 848.4913, 850.5007, 864.5184, 868.5114, 868.5114, 870.5096, 882.5266, 882.5266, 951.5828, 953.4929, 982.5417, 996.5513, 1007.6395, 1017.6248, 1017.6248, 1019.6375, 1033.6567, 1033.6567, 1036.5132, 1045.5249, 1051.6622, 1051.6622, 1131.6577, 1133.6731, 1136.6519, 1147.6853, 1165.6888, 1165.6888, 1179.5533, 1194.5757, 1234.7560, 1236.6587, 1277.6544, 1279.7057, 1300.7963, 1302.8082, 1316.8273, 1334.8298, 1334.8298, 1383.6498, 1421.6836, 1434.8480, 1448.8584, 1448.8584, 1475.6868, 1479.7338, 1617.9998, 1617.9998, 1707.7130, 1732.0293, 1732.0293, 1734.8334, 1838.8518, 1900.9630, 1901.1735, 1993.8977, 2015.2006, 2184.3567, 2211.0339, 2215.0857, 2283.0969, 2872.3440 |           |           |        |       |     |      |      |                                   |

3. [Q5EA67](#) Mass: 101617 Score: 74 Expect: 0.005 Matches: 14

Inter-alpha (Globulin) inhibitor H4 (Plasma Kallikrein-sensitive glycoprotein) OS=Bos taurus OX=9913 GN=ITIH4 PE=2 SV=1

| Observed                                                                                                                                                                                                                                                                                                                                                                                                                                                                                                                                                                                                                                                                                                            | Mr(expt)  | Mr(calc)  | ppm    | Start | End | Miss | Ions | Peptide                           |
|---------------------------------------------------------------------------------------------------------------------------------------------------------------------------------------------------------------------------------------------------------------------------------------------------------------------------------------------------------------------------------------------------------------------------------------------------------------------------------------------------------------------------------------------------------------------------------------------------------------------------------------------------------------------------------------------------------------------|-----------|-----------|--------|-------|-----|------|------|-----------------------------------|
| 835.4214                                                                                                                                                                                                                                                                                                                                                                                                                                                                                                                                                                                                                                                                                                            | 834.4141  | 834.4422  | -33.63 | 619   | 625 | 0    | ---  | R.VYLGPMR.F                       |
| 853.4803                                                                                                                                                                                                                                                                                                                                                                                                                                                                                                                                                                                                                                                                                                            | 852.4730  | 852.3946  | 92.0   | 283   | 290 | 1    | ---  | K.SGSMGGRK.I                      |
| 853.4804                                                                                                                                                                                                                                                                                                                                                                                                                                                                                                                                                                                                                                                                                                            | 852.4731  | 852.3946  | 92.1   | 283   | 290 | 1    | ---  | K.SGSMGGRK.I                      |
| 972.5108                                                                                                                                                                                                                                                                                                                                                                                                                                                                                                                                                                                                                                                                                                            | 971.5035  | 971.5400  | -37.52 | 845   | 852 | 0    | ---  | R.LLLQNTDR.F                      |
| 1031.5133                                                                                                                                                                                                                                                                                                                                                                                                                                                                                                                                                                                                                                                                                                           | 1030.5060 | 1030.5229 | -16.41 | 430   | 439 | 0    | ---  | K.MALENGGLAR.R                    |
| 1151.6821                                                                                                                                                                                                                                                                                                                                                                                                                                                                                                                                                                                                                                                                                                           | 1150.6748 | 1150.5917 | 72.2   | 616   | 625 | 1    | ---  | R.GSRVYLGPMR.F + Oxidation (M)    |
| 1211.5695                                                                                                                                                                                                                                                                                                                                                                                                                                                                                                                                                                                                                                                                                                           | 1210.5622 | 1210.6135 | -42.34 | 539   | 547 | 0    | ---  | K.YIFHSPIER.L                     |
| 1349.6478                                                                                                                                                                                                                                                                                                                                                                                                                                                                                                                                                                                                                                                                                                           | 1348.6405 | 1348.6987 | -43.13 | 230   | 241 | 0    | ---  | K.QDTVLGDSFIVR.Y                  |
| 1368.6882                                                                                                                                                                                                                                                                                                                                                                                                                                                                                                                                                                                                                                                                                                           | 1367.6809 | 1367.7409 | -43.82 | 500   | 511 | 0    | ---  | R.EQSPDVLLAQIR.G                  |
| 1402.7100                                                                                                                                                                                                                                                                                                                                                                                                                                                                                                                                                                                                                                                                                                           | 1401.7027 | 1401.7657 | -44.89 | 829   | 841 | 0    | ---  | R.VTIGLLFWDGPGK.G                 |
| 1567.6902                                                                                                                                                                                                                                                                                                                                                                                                                                                                                                                                                                                                                                                                                                           | 1566.6829 | 1566.8116 | -82.12 | 800   | 812 | 1    | ---  | K.WKETLYSVMPGLK.V + Oxidation (M) |
| 1581.7833                                                                                                                                                                                                                                                                                                                                                                                                                                                                                                                                                                                                                                                                                                           | 1580.7760 | 1580.8450 | -43.62 | 141   | 153 | 0    | ---  | K.VTFELVYEELLAR.H                 |
| 1581.7833                                                                                                                                                                                                                                                                                                                                                                                                                                                                                                                                                                                                                                                                                                           | 1580.7761 | 1580.8450 | -43.60 | 141   | 153 | 0    | 35   | K.VTFELVYEELLAR.H                 |
| 1637.8650                                                                                                                                                                                                                                                                                                                                                                                                                                                                                                                                                                                                                                                                                                           | 1636.8577 | 1636.9260 | -41.73 | 498   | 511 | 1    | ---  | K.LREQSPDVLLAQIR.G                |
| No match to: 842.4716, 848.4913, 850.5007, 864.5184, 868.5114, 868.5114, 870.5096, 882.5266, 882.5266, 951.5828, 953.4929, 982.5417, 996.5513, 1007.6395, 1017.6248, 1017.6248, 1019.6375, 1033.6567, 1033.6567, 1036.5132, 1045.5249, 1051.6622, 1051.6622, 1131.6577, 1133.6731, 1136.6519, 1147.6853, 1165.6888, 1165.6888, 1179.5533, 1194.5757, 1234.7560, 1236.6587, 1277.6544, 1279.7057, 1300.7963, 1302.8082, 1316.8273, 1334.8298, 1334.8298, 1383.6498, 1421.6836, 1434.8480, 1448.8584, 1448.8584, 1475.6868, 1479.7338, 1617.9998, 1617.9998, 1707.7130, 1732.0293, 1732.0293, 1734.8334, 1838.8518, 1900.9630, 1901.1735, 1993.8977, 2015.2006, 2184.3567, 2211.0339, 2215.0857, 2283.0969, 2872.3440 |           |           |        |       |     |      |      |                                   |

4. [Q3T052](#) Mass: 101620 Score: 74 Expect: 0.005 Matches: 14

Inter-alpha-trypsin inhibitor heavy chain H4 OS=Bos taurus OX=9913 GN=ITIH4 PE=1 SV=1

| Observed                                                                                                                                                                                                                                                                                                                                                                                                                                                                                                                                                                                                                                                                                                            | Mr(expt)  | Mr(calc)  | ppm    | Start | End | Miss | Ions | Peptide                           |
|---------------------------------------------------------------------------------------------------------------------------------------------------------------------------------------------------------------------------------------------------------------------------------------------------------------------------------------------------------------------------------------------------------------------------------------------------------------------------------------------------------------------------------------------------------------------------------------------------------------------------------------------------------------------------------------------------------------------|-----------|-----------|--------|-------|-----|------|------|-----------------------------------|
| 835.4214                                                                                                                                                                                                                                                                                                                                                                                                                                                                                                                                                                                                                                                                                                            | 834.4141  | 834.4422  | -33.63 | 619   | 625 | 0    | ---  | R.VYLGPMR.F                       |
| 853.4803                                                                                                                                                                                                                                                                                                                                                                                                                                                                                                                                                                                                                                                                                                            | 852.4730  | 852.3946  | 92.0   | 283   | 290 | 1    | ---  | K.SGSMGGRK.I                      |
| 853.4804                                                                                                                                                                                                                                                                                                                                                                                                                                                                                                                                                                                                                                                                                                            | 852.4731  | 852.3946  | 92.1   | 283   | 290 | 1    | ---  | K.SGSMGGRK.I                      |
| 972.5108                                                                                                                                                                                                                                                                                                                                                                                                                                                                                                                                                                                                                                                                                                            | 971.5035  | 971.5400  | -37.52 | 845   | 852 | 0    | ---  | R.LLLQNTDR.F                      |
| 1031.5133                                                                                                                                                                                                                                                                                                                                                                                                                                                                                                                                                                                                                                                                                                           | 1030.5060 | 1030.5229 | -16.41 | 430   | 439 | 0    | ---  | K.MALENGGLAR.R                    |
| 1151.6821                                                                                                                                                                                                                                                                                                                                                                                                                                                                                                                                                                                                                                                                                                           | 1150.6748 | 1150.5917 | 72.2   | 616   | 625 | 1    | ---  | R.GSRVYLGPMR.F + Oxidation (M)    |
| 1211.5695                                                                                                                                                                                                                                                                                                                                                                                                                                                                                                                                                                                                                                                                                                           | 1210.5622 | 1210.6135 | -42.34 | 539   | 547 | 0    | ---  | K.YIFHSPIER.L                     |
| 1349.6478                                                                                                                                                                                                                                                                                                                                                                                                                                                                                                                                                                                                                                                                                                           | 1348.6405 | 1348.6987 | -43.13 | 230   | 241 | 0    | ---  | K.QDTVLGDSFIVR.Y                  |
| 1368.6882                                                                                                                                                                                                                                                                                                                                                                                                                                                                                                                                                                                                                                                                                                           | 1367.6809 | 1367.7409 | -43.82 | 500   | 511 | 0    | ---  | R.EQSPDVLLAQIR.G                  |
| 1402.7100                                                                                                                                                                                                                                                                                                                                                                                                                                                                                                                                                                                                                                                                                                           | 1401.7027 | 1401.7657 | -44.89 | 829   | 841 | 0    | ---  | R.VTIGLLFWDGPGK.G                 |
| 1567.6902                                                                                                                                                                                                                                                                                                                                                                                                                                                                                                                                                                                                                                                                                                           | 1566.6829 | 1566.8116 | -82.12 | 800   | 812 | 1    | ---  | K.WKETLYSVMPGLK.V + Oxidation (M) |
| 1581.7833                                                                                                                                                                                                                                                                                                                                                                                                                                                                                                                                                                                                                                                                                                           | 1580.7760 | 1580.8450 | -43.62 | 141   | 153 | 0    | ---  | K.VTFELVYEELLAR.H                 |
| 1581.7833                                                                                                                                                                                                                                                                                                                                                                                                                                                                                                                                                                                                                                                                                                           | 1580.7761 | 1580.8450 | -43.60 | 141   | 153 | 0    | 35   | K.VTFELVYEELLAR.H                 |
| 1637.8650                                                                                                                                                                                                                                                                                                                                                                                                                                                                                                                                                                                                                                                                                                           | 1636.8577 | 1636.9260 | -41.73 | 498   | 511 | 1    | ---  | K.LREQSPDVLLAQIR.G                |
| No match to: 842.4716, 848.4913, 850.5007, 864.5184, 868.5114, 868.5114, 870.5096, 882.5266, 882.5266, 951.5828, 953.4929, 982.5417, 996.5513, 1007.6395, 1017.6248, 1017.6248, 1019.6375, 1033.6567, 1033.6567, 1036.5132, 1045.5249, 1051.6622, 1051.6622, 1131.6577, 1133.6731, 1136.6519, 1147.6853, 1165.6888, 1165.6888, 1179.5533, 1194.5757, 1234.7560, 1236.6587, 1277.6544, 1279.7057, 1300.7963, 1302.8082, 1316.8273, 1334.8298, 1334.8298, 1383.6498, 1421.6836, 1434.8480, 1448.8584, 1448.8584, 1475.6868, 1479.7338, 1617.9998, 1617.9998, 1707.7130, 1732.0293, 1732.0293, 1734.8334, 1838.8518, 1900.9630, 1901.1735, 1993.8977, 2015.2006, 2184.3567, 2211.0339, 2215.0857, 2283.0969, 2872.3440 |           |           |        |       |     |      |      |                                   |

5. [A0A3Q1MGQ6](#) Mass: 103466 Score: 74 Expect: 0.006 Matches: 14

Inter-alpha-trypsin inhibitor heavy chain H4 OS=Bos taurus OX=9913 GN=ITIH4 PE=4 SV=1

| Observed                                                                                                                                                                                                                                                                                                                                                                                                                                                                                                                                                                                                                                                                                                            | Mr(expt)  | Mr(calc)  | ppm    | Start | End | Miss | Ions | Peptide                           |
|---------------------------------------------------------------------------------------------------------------------------------------------------------------------------------------------------------------------------------------------------------------------------------------------------------------------------------------------------------------------------------------------------------------------------------------------------------------------------------------------------------------------------------------------------------------------------------------------------------------------------------------------------------------------------------------------------------------------|-----------|-----------|--------|-------|-----|------|------|-----------------------------------|
| 835.4214                                                                                                                                                                                                                                                                                                                                                                                                                                                                                                                                                                                                                                                                                                            | 834.4141  | 834.4422  | -33.63 | 619   | 625 | 0    | ---  | R.VYLGPMR.F                       |
| 853.4803                                                                                                                                                                                                                                                                                                                                                                                                                                                                                                                                                                                                                                                                                                            | 852.4730  | 852.3946  | 92.0   | 283   | 290 | 1    | ---  | K.SGSMGGRK.I                      |
| 853.4804                                                                                                                                                                                                                                                                                                                                                                                                                                                                                                                                                                                                                                                                                                            | 852.4731  | 852.3946  | 92.1   | 283   | 290 | 1    | ---  | K.SGSMGGRK.I                      |
| 972.5108                                                                                                                                                                                                                                                                                                                                                                                                                                                                                                                                                                                                                                                                                                            | 971.5035  | 971.5400  | -37.52 | 845   | 852 | 0    | ---  | R.LLLQNTDR.F                      |
| 1031.5133                                                                                                                                                                                                                                                                                                                                                                                                                                                                                                                                                                                                                                                                                                           | 1030.5060 | 1030.5229 | -16.41 | 430   | 439 | 0    | ---  | K.MALENGGLAR.R                    |
| 1151.6821                                                                                                                                                                                                                                                                                                                                                                                                                                                                                                                                                                                                                                                                                                           | 1150.6748 | 1150.5917 | 72.2   | 616   | 625 | 1    | ---  | R.GSRVYLGPMR.F + Oxidation (M)    |
| 1211.5695                                                                                                                                                                                                                                                                                                                                                                                                                                                                                                                                                                                                                                                                                                           | 1210.5622 | 1210.6135 | -42.34 | 539   | 547 | 0    | ---  | K.YIFHSPIER.L                     |
| 1349.6478                                                                                                                                                                                                                                                                                                                                                                                                                                                                                                                                                                                                                                                                                                           | 1348.6405 | 1348.6987 | -43.13 | 230   | 241 | 0    | ---  | K.QDTVLGDSFIVR.Y                  |
| 1368.6882                                                                                                                                                                                                                                                                                                                                                                                                                                                                                                                                                                                                                                                                                                           | 1367.6809 | 1367.7409 | -43.82 | 500   | 511 | 0    | ---  | R.EQSPDVLLAQIR.G                  |
| 1402.7100                                                                                                                                                                                                                                                                                                                                                                                                                                                                                                                                                                                                                                                                                                           | 1401.7027 | 1401.7657 | -44.89 | 829   | 841 | 0    | ---  | R.VTIGLLFWDGPGK.G                 |
| 1567.6902                                                                                                                                                                                                                                                                                                                                                                                                                                                                                                                                                                                                                                                                                                           | 1566.6829 | 1566.8116 | -82.12 | 800   | 812 | 1    | ---  | K.WKETLYSVMPGLK.V + Oxidation (M) |
| 1581.7833                                                                                                                                                                                                                                                                                                                                                                                                                                                                                                                                                                                                                                                                                                           | 1580.7760 | 1580.8450 | -43.62 | 141   | 153 | 0    | ---  | K.VTFELVYEELLAR.H                 |
| 1581.7833                                                                                                                                                                                                                                                                                                                                                                                                                                                                                                                                                                                                                                                                                                           | 1580.7761 | 1580.8450 | -43.60 | 141   | 153 | 0    | 35   | K.VTFELVYEELLAR.H                 |
| 1637.8650                                                                                                                                                                                                                                                                                                                                                                                                                                                                                                                                                                                                                                                                                                           | 1636.8577 | 1636.9260 | -41.73 | 498   | 511 | 1    | ---  | K.LREQSPDVLLAQIR.G                |
| No match to: 842.4716, 848.4913, 850.5007, 864.5184, 868.5114, 868.5114, 870.5096, 882.5266, 882.5266, 951.5828, 953.4929, 982.5417, 996.5513, 1007.6395, 1017.6248, 1017.6248, 1019.6375, 1033.6567, 1033.6567, 1036.5132, 1045.5249, 1051.6622, 1051.6622, 1131.6577, 1133.6731, 1136.6519, 1147.6853, 1165.6888, 1165.6888, 1179.5533, 1194.5757, 1234.7560, 1236.6587, 1277.6544, 1279.7057, 1300.7963, 1302.8082, 1316.8273, 1334.8298, 1334.8298, 1383.6498, 1421.6836, 1434.8480, 1448.8584, 1448.8584, 1475.6868, 1479.7338, 1617.9998, 1617.9998, 1707.7130, 1732.0293, 1732.0293, 1734.8334, 1838.8518, 1900.9630, 1901.1735, 1993.8977, 2015.2006, 2184.3567, 2211.0339, 2215.0857, 2283.0969, 2872.3440 |           |           |        |       |     |      |      |                                   |

1051.6622, 1131.6577, 1133.6731, 1136.6519, 1147.6853, 1165.6888, 1165.6888, 1179.5533, 1194.5757, 1234.7560, 1236.6587, 1277.6544, 1279.7057, 1300.7963, 1302.8082, 1316.8273, 1334.8298, 1334.8298, 1383.6498, 1421.6836, 1434.8480, 1448.8584, 1448.8584, 1475.6868, 1479.7338, 1617.9998, 1617.9998, 1707.7130, 1732.0293, 1732.0293, 1734.8334, 1838.8518, 1900.9630, 1901.1735, 1993.8977, 2015.2006, 2184.3567, 2211.0339, 2215.0857, 2283.0969, 2872.3440

6.

[A0A4W2HBJ7](#)

Mass: 101584

Score: 68

Expect: 0.019

Matches: 13

Inter-alpha-trypsin inhibitor heavy chain 4 OS=Bos indicus x Bos taurus OX=30522 GN=ITIH4 PE=4 SV=1

| Observed                                                                                                                                                                                                                                                                                                                                                                                                                                                                                                                                                                                                                                                                                                            | Mr(expt)  | Mr(calc)  | ppm    | Start | End | Miss | Ions | Peptide                          |
|---------------------------------------------------------------------------------------------------------------------------------------------------------------------------------------------------------------------------------------------------------------------------------------------------------------------------------------------------------------------------------------------------------------------------------------------------------------------------------------------------------------------------------------------------------------------------------------------------------------------------------------------------------------------------------------------------------------------|-----------|-----------|--------|-------|-----|------|------|----------------------------------|
| 835.4214                                                                                                                                                                                                                                                                                                                                                                                                                                                                                                                                                                                                                                                                                                            | 834.4141  | 834.4422  | -33.63 | 619   | 625 | 0    | ---  | R.VYLGPMR.F                      |
| 853.4803                                                                                                                                                                                                                                                                                                                                                                                                                                                                                                                                                                                                                                                                                                            | 852.4730  | 852.3946  | 92.0   | 283   | 290 | 1    | ---  | K.SGSMGRK.I                      |
| 853.4804                                                                                                                                                                                                                                                                                                                                                                                                                                                                                                                                                                                                                                                                                                            | 852.4731  | 852.3946  | 92.1   | 283   | 290 | 1    | ---  | K.SGSMGRK.I                      |
| 972.5108                                                                                                                                                                                                                                                                                                                                                                                                                                                                                                                                                                                                                                                                                                            | 971.5035  | 971.5400  | -37.52 | 845   | 852 | 0    | ---  | R.LLLQNTDR.F                     |
| 1031.5133                                                                                                                                                                                                                                                                                                                                                                                                                                                                                                                                                                                                                                                                                                           | 1030.5060 | 1030.5229 | -16.41 | 430   | 439 | 0    | ---  | K.MALENGGLAR.R                   |
| 1151.6821                                                                                                                                                                                                                                                                                                                                                                                                                                                                                                                                                                                                                                                                                                           | 1150.6748 | 1150.5917 | 72.2   | 616   | 625 | 1    | ---  | R.GSRVYLGPMR.F + Oxidation (M)   |
| 1349.6478                                                                                                                                                                                                                                                                                                                                                                                                                                                                                                                                                                                                                                                                                                           | 1348.6405 | 1348.6987 | -43.13 | 230   | 241 | 0    | ---  | K.QDTVLDSFIVR.Y                  |
| 1368.6882                                                                                                                                                                                                                                                                                                                                                                                                                                                                                                                                                                                                                                                                                                           | 1367.6809 | 1367.7409 | -43.82 | 500   | 511 | 0    | ---  | R.EQSPDVLLAQIR.G                 |
| 1402.7100                                                                                                                                                                                                                                                                                                                                                                                                                                                                                                                                                                                                                                                                                                           | 1401.7027 | 1401.7657 | -44.89 | 829   | 841 | 0    | ---  | R.VTIGLLFDGPGK.G                 |
| 1567.6902                                                                                                                                                                                                                                                                                                                                                                                                                                                                                                                                                                                                                                                                                                           | 1566.6829 | 1566.8116 | -82.12 | 800   | 812 | 1    | ---  | K.WKETLYSVMPLK.V + Oxidation (M) |
| 1581.7833                                                                                                                                                                                                                                                                                                                                                                                                                                                                                                                                                                                                                                                                                                           | 1580.7760 | 1580.8450 | -43.62 | 141   | 153 | 0    | ---  | K.VTFELVYEELLAR.H                |
| 1581.7833                                                                                                                                                                                                                                                                                                                                                                                                                                                                                                                                                                                                                                                                                                           | 1580.7761 | 1580.8450 | -43.60 | 141   | 153 | 0    | 35   | K.VTFELVYEELLAR.H                |
| 1637.8650                                                                                                                                                                                                                                                                                                                                                                                                                                                                                                                                                                                                                                                                                                           | 1636.8577 | 1636.9260 | -41.73 | 498   | 511 | 1    | ---  | K.LREQSPDVLLAQIR.G               |
| No match to: 842.4716, 848.4913, 850.5007, 864.5184, 868.5114, 868.5114, 870.5096, 882.5266, 882.5266, 951.5828, 953.4929, 982.5417, 996.5513, 1007.6395, 1017.6248, 1017.6248, 1019.6375, 1033.6567, 1033.6567, 1036.5132, 1045.5249, 1051.6622, 1051.6622, 1131.6577, 1133.6731, 1136.6519, 1147.6853, 1165.6888, 1165.6888, 1179.5533, 1194.5757, 1211.5695, 1234.7560, 1236.6587, 1277.6544, 1279.7057, 1300.7963, 1302.8082, 1316.8273, 1334.8298, 1334.8298, 1383.6498, 1421.6836, 1434.8480, 1448.8584, 1475.6868, 1479.7338, 1617.9998, 1617.9998, 1707.7130, 1732.0293, 1732.0293, 1734.8334, 1838.8518, 1900.9630, 1901.1735, 1993.8977, 2015.2006, 2184.3567, 2211.0339, 2215.0857, 2283.0969, 2872.3440 |           |           |        |       |     |      |      |                                  |

7.

[A0A3Q1MA31](#)

Mass: 99755

Score: 64

Expect: 0.057

Matches: 12

Inter-alpha-trypsin inhibitor heavy chain H4 OS=Bos taurus OX=9913 GN=ITIH4 PE=4 SV=1

| Observed                                                                                                                                                                                                                                                                                                                                                                                                                                                                                                                                                                                                                                                                                                                      | Mr(expt)  | Mr(calc)  | ppm    | Start | End | Miss | Ions | Peptide                          |
|-------------------------------------------------------------------------------------------------------------------------------------------------------------------------------------------------------------------------------------------------------------------------------------------------------------------------------------------------------------------------------------------------------------------------------------------------------------------------------------------------------------------------------------------------------------------------------------------------------------------------------------------------------------------------------------------------------------------------------|-----------|-----------|--------|-------|-----|------|------|----------------------------------|
| 853.4803                                                                                                                                                                                                                                                                                                                                                                                                                                                                                                                                                                                                                                                                                                                      | 852.4730  | 852.3946  | 92.0   | 283   | 290 | 1    | ---  | K.SGSMGRK.I                      |
| 853.4804                                                                                                                                                                                                                                                                                                                                                                                                                                                                                                                                                                                                                                                                                                                      | 852.4731  | 852.3946  | 92.1   | 283   | 290 | 1    | ---  | K.SGSMGRK.I                      |
| 972.5108                                                                                                                                                                                                                                                                                                                                                                                                                                                                                                                                                                                                                                                                                                                      | 971.5035  | 971.5400  | -37.52 | 828   | 835 | 0    | ---  | R.LLLQNTDR.F                     |
| 1031.5133                                                                                                                                                                                                                                                                                                                                                                                                                                                                                                                                                                                                                                                                                                                     | 1030.5060 | 1030.5229 | -16.41 | 430   | 439 | 0    | ---  | K.MALENGGLAR.R                   |
| 1211.5695                                                                                                                                                                                                                                                                                                                                                                                                                                                                                                                                                                                                                                                                                                                     | 1210.5622 | 1210.6135 | -42.34 | 539   | 547 | 0    | ---  | K.YIFHSFIER.L                    |
| 1349.6478                                                                                                                                                                                                                                                                                                                                                                                                                                                                                                                                                                                                                                                                                                                     | 1348.6405 | 1348.6987 | -43.13 | 230   | 241 | 0    | ---  | K.QDTVLDSFIVR.Y                  |
| 1368.6882                                                                                                                                                                                                                                                                                                                                                                                                                                                                                                                                                                                                                                                                                                                     | 1367.6809 | 1367.7409 | -43.82 | 500   | 511 | 0    | ---  | R.EQSPDVLLAQIR.G                 |
| 1402.7100                                                                                                                                                                                                                                                                                                                                                                                                                                                                                                                                                                                                                                                                                                                     | 1401.7027 | 1401.7657 | -44.89 | 812   | 824 | 0    | ---  | R.VTIGLLFDGPGK.G                 |
| 1567.6902                                                                                                                                                                                                                                                                                                                                                                                                                                                                                                                                                                                                                                                                                                                     | 1566.6829 | 1566.8116 | -82.12 | 783   | 795 | 1    | ---  | K.WKETLYSVMPLK.V + Oxidation (M) |
| 1581.7833                                                                                                                                                                                                                                                                                                                                                                                                                                                                                                                                                                                                                                                                                                                     | 1580.7760 | 1580.8450 | -43.62 | 141   | 153 | 0    | ---  | K.VTFELVYEELLAR.H                |
| 1581.7833                                                                                                                                                                                                                                                                                                                                                                                                                                                                                                                                                                                                                                                                                                                     | 1580.7761 | 1580.8450 | -43.60 | 141   | 153 | 0    | 35   | K.VTFELVYEELLAR.H                |
| 1637.8650                                                                                                                                                                                                                                                                                                                                                                                                                                                                                                                                                                                                                                                                                                                     | 1636.8577 | 1636.9260 | -41.73 | 498   | 511 | 1    | ---  | K.LREQSPDVLLAQIR.G               |
| No match to: 835.4214, 842.4716, 848.4913, 850.5007, 864.5184, 868.5114, 868.5114, 870.5096, 882.5266, 882.5266, 951.5828, 953.4929, 982.5417, 996.5513, 1007.6395, 1017.6248, 1017.6248, 1019.6375, 1033.6567, 1033.6567, 1036.5132, 1045.5249, 1051.6622, 1051.6622, 1131.6577, 1133.6731, 1136.6519, 1147.6853, 1151.6821, 1165.6888, 1165.6888, 1179.5533, 1194.5757, 1234.7560, 1236.6587, 1277.6544, 1279.7057, 1300.7963, 1302.8082, 1316.8273, 1334.8298, 1334.8298, 1383.6498, 1421.6836, 1434.8480, 1448.8584, 1475.6868, 1479.7338, 1617.9998, 1617.9998, 1707.7130, 1732.0293, 1732.0293, 1734.8334, 1838.8518, 1900.9630, 1901.1735, 1993.8977, 2015.2006, 2184.3567, 2211.0339, 2215.0857, 2283.0969, 2872.3440 |           |           |        |       |     |      |      |                                  |

8.

[A0A4W2DPE8](#)

Mass: 99755

Score: 64

Expect: 0.057

Matches: 12

Inter-alpha-trypsin inhibitor heavy chain 4 OS=Bos indicus x Bos taurus OX=30522 GN=ITIH4 PE=4 SV=1

| Observed                                                                                                                                                                                                                                                                                                                                                                                                                                                                                                                                                                                                                                                                                                                      | Mr(expt)  | Mr(calc)  | ppm    | Start | End | Miss | Ions | Peptide                          |
|-------------------------------------------------------------------------------------------------------------------------------------------------------------------------------------------------------------------------------------------------------------------------------------------------------------------------------------------------------------------------------------------------------------------------------------------------------------------------------------------------------------------------------------------------------------------------------------------------------------------------------------------------------------------------------------------------------------------------------|-----------|-----------|--------|-------|-----|------|------|----------------------------------|
| 853.4803                                                                                                                                                                                                                                                                                                                                                                                                                                                                                                                                                                                                                                                                                                                      | 852.4730  | 852.3946  | 92.0   | 283   | 290 | 1    | ---  | K.SGSMGRK.I                      |
| 853.4804                                                                                                                                                                                                                                                                                                                                                                                                                                                                                                                                                                                                                                                                                                                      | 852.4731  | 852.3946  | 92.1   | 283   | 290 | 1    | ---  | K.SGSMGRK.I                      |
| 972.5108                                                                                                                                                                                                                                                                                                                                                                                                                                                                                                                                                                                                                                                                                                                      | 971.5035  | 971.5400  | -37.52 | 828   | 835 | 0    | ---  | R.LLLQNTDR.F                     |
| 1031.5133                                                                                                                                                                                                                                                                                                                                                                                                                                                                                                                                                                                                                                                                                                                     | 1030.5060 | 1030.5229 | -16.41 | 430   | 439 | 0    | ---  | K.MALENGGLAR.R                   |
| 1211.5695                                                                                                                                                                                                                                                                                                                                                                                                                                                                                                                                                                                                                                                                                                                     | 1210.5622 | 1210.6135 | -42.34 | 539   | 547 | 0    | ---  | K.YIFHSFIER.L                    |
| 1349.6478                                                                                                                                                                                                                                                                                                                                                                                                                                                                                                                                                                                                                                                                                                                     | 1348.6405 | 1348.6987 | -43.13 | 230   | 241 | 0    | ---  | K.QDTVLDSFIVR.Y                  |
| 1368.6882                                                                                                                                                                                                                                                                                                                                                                                                                                                                                                                                                                                                                                                                                                                     | 1367.6809 | 1367.7409 | -43.82 | 500   | 511 | 0    | ---  | R.EQSPDVLLAQIR.G                 |
| 1402.7100                                                                                                                                                                                                                                                                                                                                                                                                                                                                                                                                                                                                                                                                                                                     | 1401.7027 | 1401.7657 | -44.89 | 812   | 824 | 0    | ---  | R.VTIGLLFDGPGK.G                 |
| 1567.6902                                                                                                                                                                                                                                                                                                                                                                                                                                                                                                                                                                                                                                                                                                                     | 1566.6829 | 1566.8116 | -82.12 | 783   | 795 | 1    | ---  | K.WKETLYSVMPLK.V + Oxidation (M) |
| 1581.7833                                                                                                                                                                                                                                                                                                                                                                                                                                                                                                                                                                                                                                                                                                                     | 1580.7760 | 1580.8450 | -43.62 | 141   | 153 | 0    | ---  | K.VTFELVYEELLAR.H                |
| 1581.7833                                                                                                                                                                                                                                                                                                                                                                                                                                                                                                                                                                                                                                                                                                                     | 1580.7761 | 1580.8450 | -43.60 | 141   | 153 | 0    | 35   | K.VTFELVYEELLAR.H                |
| 1637.8650                                                                                                                                                                                                                                                                                                                                                                                                                                                                                                                                                                                                                                                                                                                     | 1636.8577 | 1636.9260 | -41.73 | 498   | 511 | 1    | ---  | K.LREQSPDVLLAQIR.G               |
| No match to: 835.4214, 842.4716, 848.4913, 850.5007, 864.5184, 868.5114, 868.5114, 870.5096, 882.5266, 882.5266, 951.5828, 953.4929, 982.5417, 996.5513, 1007.6395, 1017.6248, 1017.6248, 1019.6375, 1033.6567, 1033.6567, 1036.5132, 1045.5249, 1051.6622, 1051.6622, 1131.6577, 1133.6731, 1136.6519, 1147.6853, 1151.6821, 1165.6888, 1165.6888, 1179.5533, 1194.5757, 1234.7560, 1236.6587, 1277.6544, 1279.7057, 1300.7963, 1302.8082, 1316.8273, 1334.8298, 1334.8298, 1383.6498, 1421.6836, 1434.8480, 1448.8584, 1475.6868, 1479.7338, 1617.9998, 1617.9998, 1707.7130, 1732.0293, 1732.0293, 1734.8334, 1838.8518, 1900.9630, 1901.1735, 1993.8977, 2015.2006, 2184.3567, 2211.0339, 2215.0857, 2283.0969, 2872.3440 |           |           |        |       |     |      |      |                                  |

9.

[A0A3Q1L209](#)

Mass: 100847

Score: 63

Expect: 0.061

Matches: 12

Inter-alpha-trypsin inhibitor heavy chain H4 OS=Bos taurus OX=9913 GN=ITIH4 PE=4 SV=1

| Observed                                                                                                                                                                                                                                                                                                                                                                                                                                                                                                                                                                                                                                                                                                                      | Mr(expt)  | Mr(calc)  | ppm    | Start | End | Miss | Ions | Peptide                          |
|-------------------------------------------------------------------------------------------------------------------------------------------------------------------------------------------------------------------------------------------------------------------------------------------------------------------------------------------------------------------------------------------------------------------------------------------------------------------------------------------------------------------------------------------------------------------------------------------------------------------------------------------------------------------------------------------------------------------------------|-----------|-----------|--------|-------|-----|------|------|----------------------------------|
| 853.4803                                                                                                                                                                                                                                                                                                                                                                                                                                                                                                                                                                                                                                                                                                                      | 852.4730  | 852.3946  | 92.0   | 283   | 290 | 1    | ---  | K.SGSMGRK.I                      |
| 853.4804                                                                                                                                                                                                                                                                                                                                                                                                                                                                                                                                                                                                                                                                                                                      | 852.4731  | 852.3946  | 92.1   | 283   | 290 | 1    | ---  | K.SGSMGRK.I                      |
| 972.5108                                                                                                                                                                                                                                                                                                                                                                                                                                                                                                                                                                                                                                                                                                                      | 971.5035  | 971.5400  | -37.52 | 839   | 846 | 0    | ---  | R.LLLQNTDR.F                     |
| 1031.5133                                                                                                                                                                                                                                                                                                                                                                                                                                                                                                                                                                                                                                                                                                                     | 1030.5060 | 1030.5229 | -16.41 | 430   | 439 | 0    | ---  | K.MALENGGLAR.R                   |
| 1211.5695                                                                                                                                                                                                                                                                                                                                                                                                                                                                                                                                                                                                                                                                                                                     | 1210.5622 | 1210.6135 | -42.34 | 539   | 547 | 0    | ---  | K.YIFHSFIER.L                    |
| 1349.6478                                                                                                                                                                                                                                                                                                                                                                                                                                                                                                                                                                                                                                                                                                                     | 1348.6405 | 1348.6987 | -43.13 | 230   | 241 | 0    | ---  | K.QDTVLDSFIVR.Y                  |
| 1368.6882                                                                                                                                                                                                                                                                                                                                                                                                                                                                                                                                                                                                                                                                                                                     | 1367.6809 | 1367.7409 | -43.82 | 500   | 511 | 0    | ---  | R.EQSPDVLLAQIR.G                 |
| 1402.7100                                                                                                                                                                                                                                                                                                                                                                                                                                                                                                                                                                                                                                                                                                                     | 1401.7027 | 1401.7657 | -44.89 | 823   | 835 | 0    | ---  | R.VTIGLLFDGPGK.G                 |
| 1567.6902                                                                                                                                                                                                                                                                                                                                                                                                                                                                                                                                                                                                                                                                                                                     | 1566.6829 | 1566.8116 | -82.12 | 794   | 806 | 1    | ---  | K.WKETLYSVMPLK.V + Oxidation (M) |
| 1581.7833                                                                                                                                                                                                                                                                                                                                                                                                                                                                                                                                                                                                                                                                                                                     | 1580.7760 | 1580.8450 | -43.62 | 141   | 153 | 0    | ---  | K.VTFELVYEELLAR.H                |
| 1581.7833                                                                                                                                                                                                                                                                                                                                                                                                                                                                                                                                                                                                                                                                                                                     | 1580.7761 | 1580.8450 | -43.60 | 141   | 153 | 0    | 35   | K.VTFELVYEELLAR.H                |
| 1637.8650                                                                                                                                                                                                                                                                                                                                                                                                                                                                                                                                                                                                                                                                                                                     | 1636.8577 | 1636.9260 | -41.73 | 498   | 511 | 1    | ---  | K.LREQSPDVLLAQIR.G               |
| No match to: 835.4214, 842.4716, 848.4913, 850.5007, 864.5184, 868.5114, 868.5114, 870.5096, 882.5266, 882.5266, 951.5828, 953.4929, 982.5417, 996.5513, 1007.6395, 1017.6248, 1017.6248, 1019.6375, 1033.6567, 1033.6567, 1036.5132, 1045.5249, 1051.6622, 1051.6622, 1131.6577, 1133.6731, 1136.6519, 1147.6853, 1151.6821, 1165.6888, 1165.6888, 1179.5533, 1194.5757, 1234.7560, 1236.6587, 1277.6544, 1279.7057, 1300.7963, 1302.8082, 1316.8273, 1334.8298, 1334.8298, 1383.6498, 1421.6836, 1434.8480, 1448.8584, 1475.6868, 1479.7338, 1617.9998, 1617.9998, 1707.7130, 1732.0293, 1732.0293, 1734.8334, 1838.8518, 1900.9630, 1901.1735, 1993.8977, 2015.2006, 2184.3567, 2211.0339, 2215.0857, 2283.0969, 2872.3440 |           |           |        |       |     |      |      |                                  |

10.

[A0A4W2F8Z8](#)

Mass: 99718

Score: 59

Expect: 0.18

Matches: 11

http://203.255.41.217/mascot/cgi/master\_results.pl?file=../data/20200330/F002148.da... 2020-03-31

Inter-alpha-trypsin inhibitor heavy chain 4 OS=Bos indicus x Bos taurus OX=30522 GN=ITIH4 PE=4 SV=1

| Observed                                                                                                                                                                                                                                                                                                                                                                                                                                                                                                                                                                                                                                                                                                                                            | Mr(expt)  | Mr(calc)  | ppm    | Start | End | Miss | Ions | Peptide                           |
|-----------------------------------------------------------------------------------------------------------------------------------------------------------------------------------------------------------------------------------------------------------------------------------------------------------------------------------------------------------------------------------------------------------------------------------------------------------------------------------------------------------------------------------------------------------------------------------------------------------------------------------------------------------------------------------------------------------------------------------------------------|-----------|-----------|--------|-------|-----|------|------|-----------------------------------|
| 853.4803                                                                                                                                                                                                                                                                                                                                                                                                                                                                                                                                                                                                                                                                                                                                            | 852.4730  | 852.3946  | 92.0   | 283   | -   | 290  | 1    | K.SGSMGGRK.I                      |
| 853.4804                                                                                                                                                                                                                                                                                                                                                                                                                                                                                                                                                                                                                                                                                                                                            | 852.4731  | 852.3946  | 92.1   | 283   | -   | 290  | 1    | K.SGSMGGRK.I                      |
| 972.5108                                                                                                                                                                                                                                                                                                                                                                                                                                                                                                                                                                                                                                                                                                                                            | 971.5035  | 971.5400  | -37.52 | 828   | -   | 835  | 0    | R.LLLQNTDR.F                      |
| 1031.5133                                                                                                                                                                                                                                                                                                                                                                                                                                                                                                                                                                                                                                                                                                                                           | 1030.5060 | 1030.5229 | -16.41 | 430   | -   | 439  | 0    | K.MALENGGLAR.R                    |
| 1349.6478                                                                                                                                                                                                                                                                                                                                                                                                                                                                                                                                                                                                                                                                                                                                           | 1348.6405 | 1348.6987 | -43.13 | 230   | -   | 241  | 0    | K.QDTVLDSFIVR.Y                   |
| 1368.6882                                                                                                                                                                                                                                                                                                                                                                                                                                                                                                                                                                                                                                                                                                                                           | 1367.6809 | 1367.7409 | -43.82 | 500   | -   | 511  | 0    | R.EQSPDVLQAQIR.G                  |
| 1402.7100                                                                                                                                                                                                                                                                                                                                                                                                                                                                                                                                                                                                                                                                                                                                           | 1401.7027 | 1401.7657 | -44.89 | 812   | -   | 824  | 0    | R.VTIGLFLWDGPGK.G                 |
| 1567.6902                                                                                                                                                                                                                                                                                                                                                                                                                                                                                                                                                                                                                                                                                                                                           | 1566.6829 | 1566.8116 | -82.12 | 783   | -   | 795  | 1    | K.WKETLYSVMPGLK.V + Oxidation (M) |
| 1581.7833                                                                                                                                                                                                                                                                                                                                                                                                                                                                                                                                                                                                                                                                                                                                           | 1580.7760 | 1580.8450 | -43.62 | 141   | -   | 153  | 0    | K.VTFELVYEELLAR.H                 |
| 1581.7833                                                                                                                                                                                                                                                                                                                                                                                                                                                                                                                                                                                                                                                                                                                                           | 1580.7761 | 1580.8450 | -43.60 | 141   | -   | 153  | 0    | K.VTFELVYEELLAR.H                 |
| 1637.8650                                                                                                                                                                                                                                                                                                                                                                                                                                                                                                                                                                                                                                                                                                                                           | 1636.8577 | 1636.9260 | -41.73 | 498   | -   | 511  | 1    | K.LREQSPDVLQAQIR.G                |
| No match to: 835.4214, 842.4716, 848.4913, 850.5007, 864.5184, 868.5114, 868.5114, 870.5096, 882.5266, 882.5266, 951.5828, 953.4929, 982.5417, 996.5513, 1007.6395, 1017.6248, 1017.6248, 1019.6375, 1033.6567, 1033.6567, 1036.5132, 1045.5249, 1051.6622, 1051.6622, 1131.6577, 1133.6731, 1136.6519, 1147.6853, 1151.6821, 1165.6888, 1165.6888, 1179.5533, 1194.5757, 1211.5695, 1234.7560, 1236.6587, 1277.6544, 1279.7057, 1300.7963, 1302.8082, 1316.8273, 1334.8298, 1334.8298, 1383.6498, 1421.6836, 1434.8480, 1448.8584, 1448.8584, 1475.6868, 1479.7338, 1617.9998, 1617.9998, 1707.7130, 1732.0293, 1732.0293, 1734.8334, 1838.8518, 1900.9630, 1901.1735, 1993.8977, 2015.2006, 2184.3567, 2211.0339, 2215.0857, 2283.0969, 2872.3440 |           |           |        |       |     |      |      |                                   |

11. [A0A4W2DTX3](#) Mass: 38736 Score: 42 Expect: 7.6 Matches: 10

Glutathione S-transferase omega 1 OS=Bos indicus x Bos taurus OX=30522 GN=GSTO1 PE=3 SV=1

| Observed                                                                                                                                                                                                                                                                                                                                                                                                                                                                                                                                                                                                                                                                                                                                                      | Mr(expt)  | Mr(calc)  | ppm    | Start | End | Miss | Ions | Peptide                |
|---------------------------------------------------------------------------------------------------------------------------------------------------------------------------------------------------------------------------------------------------------------------------------------------------------------------------------------------------------------------------------------------------------------------------------------------------------------------------------------------------------------------------------------------------------------------------------------------------------------------------------------------------------------------------------------------------------------------------------------------------------------|-----------|-----------|--------|-------|-----|------|------|------------------------|
| 850.5007                                                                                                                                                                                                                                                                                                                                                                                                                                                                                                                                                                                                                                                                                                                                                      | 849.4934  | 849.4241  | 81.6   | 304   | -   | 310  | 0    | K.LWMAAMK.K            |
| 870.5096                                                                                                                                                                                                                                                                                                                                                                                                                                                                                                                                                                                                                                                                                                                                                      | 869.5023  | 869.5811  | -90.54 | 140   | -   | 146  | 1    | K.RTLLVLR.A            |
| 1031.5133                                                                                                                                                                                                                                                                                                                                                                                                                                                                                                                                                                                                                                                                                                                                                     | 1030.5060 | 1030.5335 | -26.66 | 205   | -   | 213  | 0    | K.LLPGDPYEK.A          |
| 1279.7057                                                                                                                                                                                                                                                                                                                                                                                                                                                                                                                                                                                                                                                                                                                                                     | 1278.6984 | 1278.5874 | 86.8   | 236   | -   | 246  | 1    | R.TQNKEDCSGLK.E        |
| 1300.7963                                                                                                                                                                                                                                                                                                                                                                                                                                                                                                                                                                                                                                                                                                                                                     | 1299.7890 | 1299.6969 | 70.9   | 68    | -   | 79   | 1    | R.ADGCPSLALLRK.I       |
| 1402.7100                                                                                                                                                                                                                                                                                                                                                                                                                                                                                                                                                                                                                                                                                                                                                     | 1401.7027 | 1401.7715 | -49.07 | 311   | -   | 323  | 1    | K.KDPTVSSLLTDVK.T      |
| 1421.6836                                                                                                                                                                                                                                                                                                                                                                                                                                                                                                                                                                                                                                                                                                                                                     | 1420.6763 | 1420.6631 | 9.28   | 129   | -   | 139  | 1    | R.VYSMRFCPYAK.R        |
| 1732.0293                                                                                                                                                                                                                                                                                                                                                                                                                                                                                                                                                                                                                                                                                                                                                     | 1731.0220 | 1730.9679 | 31.3   | 111   | -   | 128  | 1    | R.SLGKGSAPPGPVPEGLIR.V |
| 1732.0293                                                                                                                                                                                                                                                                                                                                                                                                                                                                                                                                                                                                                                                                                                                                                     | 1731.0220 | 1730.9679 | 31.3   | 111   | -   | 128  | 1    | R.SLGKGSAPPGPVPEGLIR.V |
| 1734.8334                                                                                                                                                                                                                                                                                                                                                                                                                                                                                                                                                                                                                                                                                                                                                     | 1733.8261 | 1733.9790 | -88.16 | 218   | -   | 232  | 1    | K.MVFESFSKVPPLILK.I    |
| No match to: 835.4214, 842.4716, 848.4913, 853.4803, 853.4804, 864.5184, 868.5114, 868.5114, 882.5266, 882.5266, 951.5828, 953.4929, 972.5108, 982.5417, 996.5513, 1007.6395, 1017.6248, 1017.6248, 1019.6375, 1033.6567, 1033.6567, 1036.5132, 1045.5249, 1051.6622, 1051.6622, 1131.6577, 1133.6731, 1136.6519, 1147.6853, 1151.6821, 1165.6888, 1165.6888, 1179.5533, 1194.5757, 1211.5695, 1234.7560, 1236.6587, 1277.6544, 1302.8082, 1316.8273, 1334.8298, 1334.8298, 1349.6478, 1368.6882, 1383.6498, 1434.8480, 1448.8584, 1448.8584, 1475.6868, 1479.7338, 1567.6902, 1581.7833, 1581.7833, 1617.9998, 1617.9998, 1637.8650, 1707.7130, 1838.8518, 1900.9630, 1901.1735, 1993.8977, 2015.2006, 2184.3567, 2211.0339, 2215.0857, 2283.0969, 2872.3440 |           |           |        |       |     |      |      |                        |

12. [A0A4W2FV73](#) Mass: 38767 Score: 42 Expect: 7.6 Matches: 10

Glutathione S-transferase omega 1 OS=Bos indicus x Bos taurus OX=30522 GN=GSTO1 PE=3 SV=1

| Observed                                                                                                                                                                                                                                                                                                                                                                                                                                                                                                                                                                                                                                                                                                                                                      | Mr(expt)  | Mr(calc)  | ppm    | Start | End | Miss | Ions | Peptide                |
|---------------------------------------------------------------------------------------------------------------------------------------------------------------------------------------------------------------------------------------------------------------------------------------------------------------------------------------------------------------------------------------------------------------------------------------------------------------------------------------------------------------------------------------------------------------------------------------------------------------------------------------------------------------------------------------------------------------------------------------------------------------|-----------|-----------|--------|-------|-----|------|------|------------------------|
| 850.5007                                                                                                                                                                                                                                                                                                                                                                                                                                                                                                                                                                                                                                                                                                                                                      | 849.4934  | 849.4241  | 81.6   | 304   | -   | 310  | 0    | K.LWMAAMK.K            |
| 870.5096                                                                                                                                                                                                                                                                                                                                                                                                                                                                                                                                                                                                                                                                                                                                                      | 869.5023  | 869.5811  | -90.54 | 140   | -   | 146  | 1    | K.RTLLVLR.A            |
| 1031.5133                                                                                                                                                                                                                                                                                                                                                                                                                                                                                                                                                                                                                                                                                                                                                     | 1030.5060 | 1030.5335 | -26.66 | 205   | -   | 213  | 0    | K.LLPGDPYEK.A          |
| 1279.7057                                                                                                                                                                                                                                                                                                                                                                                                                                                                                                                                                                                                                                                                                                                                                     | 1278.6984 | 1278.5874 | 86.8   | 236   | -   | 246  | 1    | R.TQNKEDCSGLK.E        |
| 1300.7963                                                                                                                                                                                                                                                                                                                                                                                                                                                                                                                                                                                                                                                                                                                                                     | 1299.7890 | 1299.6969 | 70.9   | 68    | -   | 79   | 1    | R.ADGCPSLALLRK.I       |
| 1402.7100                                                                                                                                                                                                                                                                                                                                                                                                                                                                                                                                                                                                                                                                                                                                                     | 1401.7027 | 1401.7715 | -49.07 | 311   | -   | 323  | 1    | K.KDPTVSSLLTDVK.T      |
| 1421.6836                                                                                                                                                                                                                                                                                                                                                                                                                                                                                                                                                                                                                                                                                                                                                     | 1420.6763 | 1420.6631 | 9.28   | 129   | -   | 139  | 1    | R.VYSMRFCPYAK.R        |
| 1732.0293                                                                                                                                                                                                                                                                                                                                                                                                                                                                                                                                                                                                                                                                                                                                                     | 1731.0220 | 1730.9679 | 31.3   | 111   | -   | 128  | 1    | R.SLGKGSAPPGPVPEGLIR.V |
| 1732.0293                                                                                                                                                                                                                                                                                                                                                                                                                                                                                                                                                                                                                                                                                                                                                     | 1731.0220 | 1730.9679 | 31.3   | 111   | -   | 128  | 1    | R.SLGKGSAPPGPVPEGLIR.V |
| 1734.8334                                                                                                                                                                                                                                                                                                                                                                                                                                                                                                                                                                                                                                                                                                                                                     | 1733.8261 | 1733.9790 | -88.16 | 218   | -   | 232  | 1    | K.MVFESFSKVPPLILK.I    |
| No match to: 835.4214, 842.4716, 848.4913, 853.4803, 853.4804, 864.5184, 868.5114, 868.5114, 882.5266, 882.5266, 951.5828, 953.4929, 972.5108, 982.5417, 996.5513, 1007.6395, 1017.6248, 1017.6248, 1019.6375, 1033.6567, 1033.6567, 1036.5132, 1045.5249, 1051.6622, 1051.6622, 1131.6577, 1133.6731, 1136.6519, 1147.6853, 1151.6821, 1165.6888, 1165.6888, 1179.5533, 1194.5757, 1211.5695, 1234.7560, 1236.6587, 1277.6544, 1302.8082, 1316.8273, 1334.8298, 1334.8298, 1349.6478, 1368.6882, 1383.6498, 1434.8480, 1448.8584, 1448.8584, 1475.6868, 1479.7338, 1567.6902, 1581.7833, 1581.7833, 1617.9998, 1617.9998, 1637.8650, 1707.7130, 1838.8518, 1900.9630, 1901.1735, 1993.8977, 2015.2006, 2184.3567, 2211.0339, 2215.0857, 2283.0969, 2872.3440 |           |           |        |       |     |      |      |                        |

13. [A0A3Q1LRF3](#) Mass: 39309 Score: 41 Expect: 9.7 Matches: 5

Uncharacterized protein OS=Bos taurus OX=9913 PE=4 SV=1

| Observed                                                                                                                                                                                                                                                                                                                                                                                                                                                                                                                                                                                                                                                                                                                                                                                     | Mr(expt)  | Mr(calc)  | ppm    | Start | End | Miss | Ions | Peptide                       |
|----------------------------------------------------------------------------------------------------------------------------------------------------------------------------------------------------------------------------------------------------------------------------------------------------------------------------------------------------------------------------------------------------------------------------------------------------------------------------------------------------------------------------------------------------------------------------------------------------------------------------------------------------------------------------------------------------------------------------------------------------------------------------------------------|-----------|-----------|--------|-------|-----|------|------|-------------------------------|
| 1236.6587                                                                                                                                                                                                                                                                                                                                                                                                                                                                                                                                                                                                                                                                                                                                                                                    | 1235.6514 | 1235.6193 | 26.0   | 337   | -   | 346  | 1    | K.NVNALACRYR.-                |
| 1421.6836                                                                                                                                                                                                                                                                                                                                                                                                                                                                                                                                                                                                                                                                                                                                                                                    | 1420.6763 | 1420.7674 | -64.11 | 106   | -   | 117  | 1    | R.LFSNTLSQIRK.I               |
| 1732.0293                                                                                                                                                                                                                                                                                                                                                                                                                                                                                                                                                                                                                                                                                                                                                                                    | 1731.0220 | 1730.8587 | 94.3   | 28    | -   | 43   | 0    | R.NPNNSWNSSSALLK.Y            |
| 1732.0293                                                                                                                                                                                                                                                                                                                                                                                                                                                                                                                                                                                                                                                                                                                                                                                    | 1731.0220 | 1730.8587 | 94.3   | 28    | -   | 43   | 0    | R.NPNNSWNSSSALLK.Y            |
| 2872.3440                                                                                                                                                                                                                                                                                                                                                                                                                                                                                                                                                                                                                                                                                                                                                                                    | 2871.3367 | 2871.5640 | -79.16 | 293   | -   | 318  | 0    | K.SVQLNGQPLVMVDDGTLPELKPRLR.A |
| No match to: 835.4214, 842.4716, 848.4913, 850.5007, 853.4803, 853.4804, 864.5184, 868.5114, 868.5114, 870.5096, 882.5266, 882.5266, 951.5828, 953.4929, 972.5108, 982.5417, 996.5513, 1007.6395, 1017.6248, 1017.6248, 1019.6375, 1033.6567, 1033.6567, 1036.5132, 1045.5249, 1051.6622, 1051.6622, 1131.6577, 1133.6731, 1136.6519, 1147.6853, 1151.6821, 1165.6888, 1165.6888, 1179.5533, 1194.5757, 1211.5695, 1234.7560, 1277.6544, 1279.7057, 1300.7963, 1302.8082, 1316.8273, 1334.8298, 1334.8298, 1349.6478, 1368.6882, 1383.6498, 1434.8480, 1448.8584, 1448.8584, 1475.6868, 1479.7338, 1567.6902, 1581.7833, 1581.7833, 1617.9998, 1617.9998, 1637.8650, 1707.7130, 1734.8334, 1838.8518, 1900.9630, 1901.1735, 1993.8977, 2015.2006, 2184.3567, 2211.0339, 2215.0857, 2283.0969 |           |           |        |       |     |      |      |                               |

14. [A0A4W2F6I5](#) Mass: 532453 Score: 39 Expect: 15 Matches: 35

Plectin OS=Bos indicus x Bos taurus OX=30522 GN=PLEC PE=4 SV=1

| Observed  | Mr(expt)  | Mr(calc)  | ppm    | Start | End | Miss | Ions | Peptide                      |
|-----------|-----------|-----------|--------|-------|-----|------|------|------------------------------|
| 835.4214  | 834.4141  | 834.4269  | -15.32 | 4492  | -   | 4499 | 0    | K.MSAAQALK.K + Oxidation (M) |
| 850.5007  | 849.4934  | 849.4596  | 39.8   | 723   | -   | 729  | 0    | R.LDLQYAK.L                  |
| 864.5184  | 863.5111  | 863.4501  | 70.7   | 2299  | -   | 2305 | 0    | K.FAEQTLR.Q                  |
| 953.4929  | 952.4856  | 952.4403  | 47.6   | 3635  | -   | 3642 | 0    | K.GPFDPNTR.E                 |
| 972.5108  | 971.5035  | 971.5148  | -11.61 | 2205  | -   | 2213 | 1    | R.LRGEAEAR.R                 |
| 982.5417  | 981.5344  | 981.4953  | 39.8   | 3493  | -   | 3500 | 0    | K.VTIYEAMR.R                 |
| 996.5513  | 995.5440  | 995.5261  | 18.0   | 924   | -   | 932  | 1    | R.NPAQPTRGR.V                |
| 1017.6248 | 1016.6175 | 1016.5502 | 66.2   | 4587  | -   | 4596 | 0    | R.LLEAAQSSK.G                |
| 1017.6248 | 1016.6175 | 1016.5502 | 66.2   | 4587  | -   | 4596 | 0    | R.LLEAAQSSK.G                |
| 1031.5133 | 1030.5060 | 1030.5043 | 1.68   | 2266  | -   | 2274 | 1    | R.KEAEQEAR.R                 |
| 1036.5132 | 1035.5059 | 1035.4985 | 7.15   | 130   | -   | 139  | 0    | R.GPPPTEDPAR.E               |
| 1045.5249 | 1044.5176 | 1044.5312 | -12.99 | 1565  | -   | 1573 | 1    | R.QVEAAERSR.L                |
| 1131.6577 | 1130.6504 | 1130.6183 | 28.5   | 1976  | -   | 1985 | 1    | K.TEAEIALKEK.E               |
| 1133.6731 | 1132.6658 | 1132.5910 | 66.0   | 1111  | -   | 1119 | 1    | R.CISELKDIR.L                |



|                                                                                                                                                                                                                                                                                                                                                                                                                                                            |           |           |        |      |   |      |   |     |                                    |
|------------------------------------------------------------------------------------------------------------------------------------------------------------------------------------------------------------------------------------------------------------------------------------------------------------------------------------------------------------------------------------------------------------------------------------------------------------|-----------|-----------|--------|------|---|------|---|-----|------------------------------------|
| 1165.6888                                                                                                                                                                                                                                                                                                                                                                                                                                                  | 1164.6815 | 1164.5662 | 99.0   | 4326 | - | 4335 | 0 | --- | R.QYDIDEAIAK.S                     |
| 1165.6888                                                                                                                                                                                                                                                                                                                                                                                                                                                  | 1164.6816 | 1164.5662 | 99.0   | 4326 | - | 4335 | 0 | --- | R.QYDIDEAIAK.S                     |
| 1179.5533                                                                                                                                                                                                                                                                                                                                                                                                                                                  | 1178.5460 | 1178.5237 | 18.9   | 2501 | - | 2510 | 0 | --- | R.QLEMSAEAER.L + Oxidation (M)     |
| 1194.5757                                                                                                                                                                                                                                                                                                                                                                                                                                                  | 1193.5684 | 1193.6842 | -96.98 | 4146 | - | 4155 | 1 | --- | K.LISLFAQMKK.G + Oxidation (M)     |
| 1234.7560                                                                                                                                                                                                                                                                                                                                                                                                                                                  | 1233.7487 | 1233.6618 | 70.4   | 59   | - | 68   | 1 | --- | R.GLVRETFAWR.H                     |
| 1236.6587                                                                                                                                                                                                                                                                                                                                                                                                                                                  | 1235.6514 | 1235.6220 | 23.8   | 4117 | - | 4127 | 1 | --- | R.MGIVGPEFKDK.L + Oxidation (M)    |
| 1279.7057                                                                                                                                                                                                                                                                                                                                                                                                                                                  | 1278.6984 | 1278.7183 | -15.56 | 3550 | - | 3561 | 1 | --- | K.LLSAEKAVTGYK.D                   |
| 1300.7963                                                                                                                                                                                                                                                                                                                                                                                                                                                  | 1299.7890 | 1299.7333 | 42.9   | 4468 | - | 4478 | 1 | --- | K.IMVDRINLAQK.A                    |
| 1316.8273                                                                                                                                                                                                                                                                                                                                                                                                                                                  | 1315.8200 | 1315.7282 | 69.8   | 4468 | - | 4478 | 1 | --- | K.IMVDRINLAQK.A + Oxidation (M)    |
| 1383.6498                                                                                                                                                                                                                                                                                                                                                                                                                                                  | 1382.6425 | 1382.7630 | -87.11 | 2161 | - | 2172 | 1 | --- | R.QLQAQEAQKRL                      |
| 1434.8480                                                                                                                                                                                                                                                                                                                                                                                                                                                  | 1433.8407 | 1433.7626 | 54.5   | 3643 | - | 3653 | 1 | --- | R.ENLTYRQLLER.C                    |
| 1448.8584                                                                                                                                                                                                                                                                                                                                                                                                                                                  | 1447.8511 | 1447.7089 | 98.3   | 2501 | - | 2512 | 1 | --- | R.QLEMSAEAERLR.L + Oxidation (M)   |
| 1448.8584                                                                                                                                                                                                                                                                                                                                                                                                                                                  | 1447.8511 | 1447.7089 | 98.3   | 2501 | - | 2512 | 1 | --- | R.QLEMSAEAERLR.L + Oxidation (M)   |
| 1475.6868                                                                                                                                                                                                                                                                                                                                                                                                                                                  | 1474.6795 | 1474.7263 | -31.74 | 3290 | - | 3303 | 1 | --- | K.ETSTALTAPRDDAK.T                 |
| 1637.8650                                                                                                                                                                                                                                                                                                                                                                                                                                                  | 1636.8577 | 1636.8672 | -5.76  | 1240 | - | 1255 | 0 | --- | K.EAQAVPAALPELEATK.A               |
| 1732.0293                                                                                                                                                                                                                                                                                                                                                                                                                                                  | 1731.0220 | 1730.9203 | 58.8   | 3991 | - | 4006 | 1 | --- | R.DEASGLFLLPLSDARK.L               |
| 1732.0293                                                                                                                                                                                                                                                                                                                                                                                                                                                  | 1731.0220 | 1730.8549 | 96.6   | 392  | - | 406  | 0 | --- | K.SIITYVSSLYDAMP.R + Oxidation (M) |
| 1900.9630                                                                                                                                                                                                                                                                                                                                                                                                                                                  | 1899.9557 | 1899.8396 | 61.1   | 951  | - | 966  | 0 | --- | K.GDECQMLGPAQPFHWK.V               |
| 1993.8977                                                                                                                                                                                                                                                                                                                                                                                                                                                  | 1992.8904 | 1993.0593 | -84.71 | 3257 | - | 3275 | 1 | --- | R.LLDAQSLTGGIVDPSKSHR.L            |
| 2211.0339                                                                                                                                                                                                                                                                                                                                                                                                                                                  | 2210.0266 | 2210.1039 | -34.96 | 2245 | - | 2265 | 1 | --- | K.QAAEEQAQAQAQAAAEKLR.K            |
| 2215.0857                                                                                                                                                                                                                                                                                                                                                                                                                                                  | 2214.0784 | 2214.1168 | -17.34 | 149  | - | 170  | 0 | --- | K.EPEEGAPEPPVVPATTPGTLAR.Q         |
| No match to: 842.4716, 848.4913, 853.4803, 853.4804, 868.5114, 870.5096, 882.5266, 882.5266, 951.5828, 1007.6395, 1019.6375, 1033.6567, 1033.6567, 1051.6622, 1051.6622, 1136.6519, 1147.6853, 1151.6821, 1211.5695, 1277.6544, 1302.8082, 1334.8298, 1334.8298, 1349.6478, 1368.6882, 1402.7100, 1421.6836, 1479.7338, 1567.6902, 1581.7833, 1617.9998, 1617.9998, 1707.7130, 1734.8334, 1838.8518, 1901.1735, 2015.2006, 2184.3567, 2283.0969, 2872.3440 |           |           |        |      |   |      |   |     |                                    |

15. [A0A4W2FCN9](#) Mass: 123016 Score: 39 Expect: 17 Matches: 17  
Coiled-coil domain containing 150 OS=Bos indicus x Bos taurus OX=30522 GN=CCDC150 PE=4 SV=1

| observed                                                                                                                                                                                                                                                                                                                                                                                                                                                                                                                                                                                                                                                                           | Mr(expt)  | Mr(calc)  | ppm    | Start | End   | Miss | Ions | Peptide                                |
|------------------------------------------------------------------------------------------------------------------------------------------------------------------------------------------------------------------------------------------------------------------------------------------------------------------------------------------------------------------------------------------------------------------------------------------------------------------------------------------------------------------------------------------------------------------------------------------------------------------------------------------------------------------------------------|-----------|-----------|--------|-------|-------|------|------|----------------------------------------|
| 848.4913                                                                                                                                                                                                                                                                                                                                                                                                                                                                                                                                                                                                                                                                           | 847.4840  | 847.4664  | 20.8   | 642   | - 648 | 1    | ---  | K.KVGNFQR.Q                            |
| 864.5184                                                                                                                                                                                                                                                                                                                                                                                                                                                                                                                                                                                                                                                                           | 863.5111  | 863.4422  | 79.8   | 826   | - 832 | 1    | ---  | R.EVTEMKK.A                            |
| 868.5114                                                                                                                                                                                                                                                                                                                                                                                                                                                                                                                                                                                                                                                                           | 867.5041  | 867.4450  | 68.1   | 766   | - 772 | 0    | ---  | K.LDHVQEK.L                            |
| 868.5114                                                                                                                                                                                                                                                                                                                                                                                                                                                                                                                                                                                                                                                                           | 867.5041  | 867.4450  | 68.1   | 766   | - 772 | 0    | ---  | K.LDHVQEK.L                            |
| 1031.5133                                                                                                                                                                                                                                                                                                                                                                                                                                                                                                                                                                                                                                                                          | 1030.5060 | 1030.5658 | -58.04 | 441   | - 449 | 0    | ---  | K.ELLESTIAR.L                          |
| 1147.6853                                                                                                                                                                                                                                                                                                                                                                                                                                                                                                                                                                                                                                                                          | 1146.6780 | 1146.6067 | 62.2   | 893   | - 901 | 1    | ---  | R.MKQIETELR.Q                          |
| 1279.7057                                                                                                                                                                                                                                                                                                                                                                                                                                                                                                                                                                                                                                                                          | 1278.6984 | 1278.6754 | 18.0   | 110   | - 119 | 1    | ---  | K.MNIFRLQTEK.D                         |
| 1300.7963                                                                                                                                                                                                                                                                                                                                                                                                                                                                                                                                                                                                                                                                          | 1299.7890 | 1299.7510 | 29.2   | 441   | - 451 | 1    | ---  | K.ELLESTIARLR.G                        |
| 1402.7100                                                                                                                                                                                                                                                                                                                                                                                                                                                                                                                                                                                                                                                                          | 1401.7027 | 1401.7351 | -23.09 | 295   | - 306 | 1    | ---  | R.DDIISKLVENK.N                        |
| 1448.8584                                                                                                                                                                                                                                                                                                                                                                                                                                                                                                                                                                                                                                                                          | 1447.8511 | 1447.7453 | 73.1   | 30    | - 41  | 1    | ---  | R.MRIVEEQTSSLR.D                       |
| 1448.8584                                                                                                                                                                                                                                                                                                                                                                                                                                                                                                                                                                                                                                                                          | 1447.8511 | 1447.7453 | 73.1   | 30    | - 41  | 1    | ---  | R.MRIVEEQTSSLR.D                       |
| 1475.6868                                                                                                                                                                                                                                                                                                                                                                                                                                                                                                                                                                                                                                                                          | 1474.6795 | 1474.6535 | 17.6   | 163   | - 174 | 1    | ---  | K.EEEDKAQDEVQR.L                       |
| 1479.7338                                                                                                                                                                                                                                                                                                                                                                                                                                                                                                                                                                                                                                                                          | 1478.7265 | 1478.7551 | -19.35 | 985   | - 996 | 1    | ---  | K.CRFDGLQLELTK.N                       |
| 1637.8650                                                                                                                                                                                                                                                                                                                                                                                                                                                                                                                                                                                                                                                                          | 1636.8577 | 1636.7913 | 40.6   | 1     | - 14  | 0    | ---  | -.METTMSRPVLSPTR.I + 2 Oxidation (M)   |
| 2184.3567                                                                                                                                                                                                                                                                                                                                                                                                                                                                                                                                                                                                                                                                          | 2183.3494 | 2183.1368 | 97.4   | 747   | - 765 | 1    | ---  | R.KLAMSLAQQTNNHLQTK.L + Oxidation (M)  |
| 2211.0339                                                                                                                                                                                                                                                                                                                                                                                                                                                                                                                                                                                                                                                                          | 2210.0266 | 2210.0498 | -10.47 | 964   | - 981 | 1    | ---  | R.QELENRCQITANLEEAHR.W                 |
| 2283.0969                                                                                                                                                                                                                                                                                                                                                                                                                                                                                                                                                                                                                                                                          | 2282.0896 | 2282.1324 | -18.76 | 359   | - 377 | 1    | ---  | K.MENTRIADHQAILQEEQK.M + Oxidation (M) |
| No match to: 835.4214, 842.4716, 850.5007, 853.4803, 853.4804, 870.5096, 882.5266, 882.5266, 951.5828, 953.4929, 972.5108, 982.5417, 996.5513, 1007.6395, 1017.6248, 1017.6248, 1019.6375, 1033.6567, 1033.6567, 1036.5132, 1045.5249, 1051.6622, 1051.6622, 1131.6577, 1133.6731, 1136.6519, 1151.6821, 1165.6888, 1165.6888, 1179.5533, 1194.5757, 1211.5695, 1234.7560, 1236.6587, 1277.6544, 1302.8082, 1316.8273, 1334.8298, 1334.8298, 1349.6478, 1368.6882, 1383.6498, 1421.6836, 1434.8480, 1567.6902, 1581.7833, 1581.7833, 1617.9998, 1617.9998, 1707.7130, 1732.0293, 1732.0293, 1734.8334, 1838.8518, 1900.9630, 1901.1735, 1993.8977, 2015.2006, 2215.0857, 2872.3440 |           |           |        |       |       |      |      |                                        |

16. [A0A4W2DYM0](#) Mass: 53619 Score: 38 Expect: 21 Matches: 8  
NAD-dependent protein lipamidase sirtuin-4, mitochondrial OS=Bos indicus x Bos taurus OX=30522 GN=SIRT4 PE=3 SV=1

| observed                                                                                                                                                                                                                                                                                                                                                                                                                                                                                                                                                                                                                                                                                                                                                                 | Mr(expt)  | Mr(calc)  | ppm    | Start | End   | Miss | Ions | Peptide                                  |
|--------------------------------------------------------------------------------------------------------------------------------------------------------------------------------------------------------------------------------------------------------------------------------------------------------------------------------------------------------------------------------------------------------------------------------------------------------------------------------------------------------------------------------------------------------------------------------------------------------------------------------------------------------------------------------------------------------------------------------------------------------------------------|-----------|-----------|--------|-------|-------|------|------|------------------------------------------|
| 848.4913                                                                                                                                                                                                                                                                                                                                                                                                                                                                                                                                                                                                                                                                                                                                                                 | 847.4840  | 847.4287  | 65.3   | 444   | - 451 | 0    | ---  | R.SDDLASLK.L                             |
| 864.5184                                                                                                                                                                                                                                                                                                                                                                                                                                                                                                                                                                                                                                                                                                                                                                 | 863.5111  | 863.5229  | -13.61 | 202   | - 208 | 1    | ---  | R.FITLSKR.L                              |
| 1234.7560                                                                                                                                                                                                                                                                                                                                                                                                                                                                                                                                                                                                                                                                                                                                                                | 1233.7487 | 1233.7081 | 32.9   | 198   | - 207 | 1    | ---  | K.ELQRFITLSK.R                           |
| 1383.6498                                                                                                                                                                                                                                                                                                                                                                                                                                                                                                                                                                                                                                                                                                                                                                | 1382.6425 | 1382.6976 | -39.86 | 50    | - 61  | 1    | ---  | R.MTTAFSLRVSDR.Q                         |
| 1734.8334                                                                                                                                                                                                                                                                                                                                                                                                                                                                                                                                                                                                                                                                                                                                                                | 1733.8261 | 1733.9438 | -67.85 | 240   | - 254 | 1    | ---  | R.RPIQHGFVRSAPVR.Q                       |
| 1900.9630                                                                                                                                                                                                                                                                                                                                                                                                                                                                                                                                                                                                                                                                                                                                                                | 1899.9557 | 1899.9169 | 20.4   | 257   | - 271 | 1    | ---  | R.YWARNFVGWQFSSR.Q                       |
| 2283.0969                                                                                                                                                                                                                                                                                                                                                                                                                                                                                                                                                                                                                                                                                                                                                                | 2282.0896 | 2282.1841 | -41.41 | 38    | - 57  | 1    | ---  | K.LENVSTHPLPPRMTTAFSLR.V + Oxidation (M) |
| 2872.3440                                                                                                                                                                                                                                                                                                                                                                                                                                                                                                                                                                                                                                                                                                                                                                | 2871.3367 | 2871.4225 | -29.88 | 170   | - 195 | 1    | ---  | R.ANFSQQCSLRSTGLFVPPSPPLDPEK.V           |
| No match to: 835.4214, 842.4716, 850.5007, 853.4803, 853.4804, 868.5114, 868.5114, 870.5096, 882.5266, 882.5266, 951.5828, 953.4929, 972.5108, 982.5417, 996.5513, 1007.6395, 1017.6248, 1017.6248, 1019.6375, 1031.5133, 1033.6567, 1036.5132, 1045.5249, 1051.6622, 1051.6622, 1131.6577, 1133.6731, 1136.6519, 1147.6853, 1151.6821, 1165.6888, 1165.6888, 1179.5533, 1194.5757, 1211.5695, 1236.6587, 1277.6544, 1279.7057, 1300.7963, 1302.8082, 1316.8273, 1334.8298, 1334.8298, 1349.6478, 1368.6882, 1402.7100, 1421.6836, 1434.8480, 1448.8584, 1448.8584, 1475.6868, 1479.7338, 1567.6902, 1581.7833, 1581.7833, 1617.9998, 1617.9998, 1637.8650, 1707.7130, 1732.0293, 1732.0293, 1838.8518, 1901.1735, 1993.8977, 2015.2006, 2184.3567, 2211.0339, 2215.0857 |           |           |        |       |       |      |      |                                          |

17. [A0A4W2GWY7](#) Mass: 132560 Score: 38 Expect: 24 Matches: 14  
Euchromatic histone lysine methyltransferase 1 OS=Bos indicus x Bos taurus OX=30522 GN=EHTM1 PE=4 SV=1

| observed                                                                                                                                                                                                                                                                                                                                                                                                                                                                                                                                                                                                                                                                                                           | Mr(expt)  | Mr(calc)  | ppm    | Start | End    | Miss | Ions | Peptide                               |
|--------------------------------------------------------------------------------------------------------------------------------------------------------------------------------------------------------------------------------------------------------------------------------------------------------------------------------------------------------------------------------------------------------------------------------------------------------------------------------------------------------------------------------------------------------------------------------------------------------------------------------------------------------------------------------------------------------------------|-----------|-----------|--------|-------|--------|------|------|---------------------------------------|
| 842.4716                                                                                                                                                                                                                                                                                                                                                                                                                                                                                                                                                                                                                                                                                                           | 841.4643  | 841.4082  | 66.6   | 1095  | - 1101 | 0    | ---  | R.FYGNVSR.F                           |
| 848.4913                                                                                                                                                                                                                                                                                                                                                                                                                                                                                                                                                                                                                                                                                                           | 847.4840  | 847.4222  | 73.0   | 486   | - 492  | 1    | ---  | R.METPKSR.E                           |
| 953.4929                                                                                                                                                                                                                                                                                                                                                                                                                                                                                                                                                                                                                                                                                                           | 952.4856  | 952.5342  | -50.96 | 159   | - 168  | 1    | ---  | K.KAPAPGADV.K                         |
| 1019.6375                                                                                                                                                                                                                                                                                                                                                                                                                                                                                                                                                                                                                                                                                                          | 1018.6302 | 1018.5295 | 98.9   | 866   | - 874  | 1    | ---  | R.DSDVTLKNK.E                         |
| 1151.6821                                                                                                                                                                                                                                                                                                                                                                                                                                                                                                                                                                                                                                                                                                          | 1150.6748 | 1150.6169 | 50.4   | 271   | - 279  | 1    | ---  | K.QRTVIEMFK.S                         |
| 1211.5695                                                                                                                                                                                                                                                                                                                                                                                                                                                                                                                                                                                                                                                                                                          | 1210.5622 | 1210.5587 | 2.91   | 1157  | - 1166 | 1    | ---  | K.LFSCRCGSPK.C                        |
| 1368.6882                                                                                                                                                                                                                                                                                                                                                                                                                                                                                                                                                                                                                                                                                                          | 1367.6809 | 1367.6317 | 36.0   | 198   | - 208  | 1    | ---  | R.DHEEPKEELSR.G                       |
| 1475.6868                                                                                                                                                                                                                                                                                                                                                                                                                                                                                                                                                                                                                                                                                                          | 1474.6795 | 1474.7086 | -19.71 | 339   | - 352  | 1    | ---  | R.ASKDGVLPADCSQK.V                    |
| 1479.7338                                                                                                                                                                                                                                                                                                                                                                                                                                                                                                                                                                                                                                                                                                          | 1478.7265 | 1478.8358 | -73.86 | 393   | - 405  | 1    | ---  | K.GKPDSPWIKPARK.R                     |
| 1567.6902                                                                                                                                                                                                                                                                                                                                                                                                                                                                                                                                                                                                                                                                                                          | 1566.6829 | 1566.8154 | -84.56 | 645   | - 657  | 1    | ---  | K.QLYFSARQGLQK.V                      |
| 1732.0293                                                                                                                                                                                                                                                                                                                                                                                                                                                                                                                                                                                                                                                                                                          | 1731.0220 | 1730.8675 | 89.3   | 1102  | - 1115 | 0    | ---  | R.FINHHCEPNLVPVR.V                    |
| 1732.0293                                                                                                                                                                                                                                                                                                                                                                                                                                                                                                                                                                                                                                                                                                          | 1731.0220 | 1730.8675 | 89.3   | 1102  | - 1115 | 0    | ---  | R.FINHHCEPNLVPVR.V                    |
| 1838.8518                                                                                                                                                                                                                                                                                                                                                                                                                                                                                                                                                                                                                                                                                                          | 1837.8445 | 1837.9244 | -43.46 | 273   | - 289  | 1    | ---  | R.TVIEMFKSIHTSTGGSK.G + Oxidation (M) |
| 2872.3440                                                                                                                                                                                                                                                                                                                                                                                                                                                                                                                                                                                                                                                                                                          | 2871.3367 | 2871.4185 | -28.48 | 875   | - 900  | 0    | ---  | K.EGETPLQCSLNSQVWSALQVQSALR.D         |
| No match to: 835.4214, 850.5007, 853.4803, 853.4804, 864.5184, 868.5114, 868.5114, 870.5096, 882.5266, 882.5266, 951.5828, 972.5108, 982.5417, 996.5513, 1007.6395, 1017.6248, 1017.6248, 1031.5133, 1033.6567, 1036.5132, 1045.5249, 1051.6622, 1051.6622, 1131.6577, 1133.6731, 1136.6519, 1147.6853, 1165.6888, 1165.6888, 1179.5533, 1194.5757, 1234.7560, 1236.6587, 1277.6544, 1279.7057, 1300.7963, 1302.8082, 1316.8273, 1334.8298, 1334.8298, 1349.6478, 1368.6882, 1383.6498, 1402.7100, 1421.6836, 1434.8480, 1448.8584, 1448.8584, 1581.7833, 1581.7833, 1617.9998, 1617.9998, 1637.8650, 1707.7130, 1734.8334, 1900.9630, 1901.1735, 1993.8977, 2015.2006, 2184.3567, 2211.0339, 2215.0857, 2283.0969 |           |           |        |       |        |      |      |                                       |



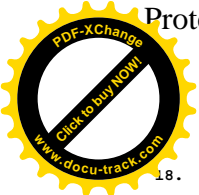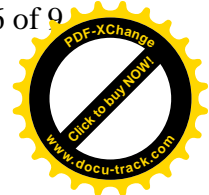

18. **A0A4W2E8Y3** Mass: 132257 Score: 36 Expect: 31 Matches: 14  
 Euchromatic histone lysine methyltransferase 1 OS=Bos indicus x Bos taurus OX=30522 GN=EHTM1 PE=4 SV=1
- | Observed  | Mr(expt)  | Mr(calc)  | ppm    | Start | End | Miss | Ions | Peptide                               |
|-----------|-----------|-----------|--------|-------|-----|------|------|---------------------------------------|
| 842.4716  | 841.4643  | 841.4082  | 66.6   | 1153  | -   | 1159 | 0    | R.FYGNVSR.F                           |
| 848.4913  | 847.4840  | 847.4222  | 73.0   | 486   | -   | 492  | 1    | R.METPKSR.E                           |
| 953.4929  | 952.4856  | 952.5342  | -50.96 | 159   | -   | 168  | 1    | K.KAPAPGADV.V                         |
| 1019.6375 | 1018.6302 | 1018.5295 | 98.9   | 924   | -   | 932  | 1    | R.DSDVTLKNN.E                         |
| 1151.6821 | 1150.6748 | 1150.6169 | 50.4   | 271   | -   | 279  | 1    | K.QRTVIEMFK.S                         |
| 1211.5695 | 1210.5622 | 1210.5288 | 27.6   | 1143  | -   | 1152 | 0    | K.DGELYCIDAR.F                        |
| 1368.6882 | 1367.6809 | 1367.6317 | 36.0   | 198   | -   | 208  | 1    | R.DHEEPKEELSR.G                       |
| 1475.6868 | 1474.6795 | 1474.7086 | -19.71 | 339   | -   | 352  | 1    | R.ASKDGVLPDCSQK.V                     |
| 1479.7338 | 1478.7265 | 1478.8358 | -73.86 | 393   | -   | 405  | 1    | K.GKPDSPWIKPARK.R                     |
| 1567.6902 | 1566.6829 | 1566.8154 | -84.56 | 703   | -   | 715  | 1    | K.QLYFSARQGLQK.V                      |
| 1732.0293 | 1731.0220 | 1730.8675 | 89.3   | 1160  | -   | 1173 | 0    | R.FINHHCEPNLVPVR.V                    |
| 1732.0293 | 1731.0220 | 1730.8675 | 89.3   | 1160  | -   | 1173 | 0    | R.FINHHCEPNLVPVR.V                    |
| 1838.8518 | 1837.8445 | 1837.9244 | -43.46 | 273   | -   | 289  | 1    | R.TVIEMFKSITHSTGGSK.G + Oxidation (M) |
| 2872.3440 | 2871.3367 | 2871.4185 | -28.48 | 933   | -   | 958  | 0    | K.EGETPLQCSALNSQVWSALQVSQALR.D        |
- No match to: 835.4214, 850.5007, 853.4803, 853.4804, 864.5184, 868.5114, 868.5114, 870.5096, 882.5266, 882.5266, 951.5828, 972.5108, 982.5417, 996.5513, 1007.6395, 1017.6248, 1017.6248, 1031.5133, 1033.6567, 1033.6567, 1036.5132, 1045.5249, 1051.6622, 1051.6622, 1131.6577, 1133.6731, 1136.6519, 1147.6853, 1165.6888, 1165.6888, 1179.5533, 1194.5757, 1234.7560, 1236.6587, 1277.6544, 1279.7057, 1300.7963, 1302.8082, 1316.8273, 1334.8298, 1334.8298, 1349.6478, 1383.6498, 1402.7100, 1421.6836, 1434.8480, 1448.8584, 1448.8584, 1581.7833, 1581.7833, 1617.9998, 1617.9998, 1637.8650, 1707.7130, 1734.8334, 1900.9630, 1901.1735, 1993.8977, 2015.2006, 2184.3567, 2211.0339, 2215.0857, 2283.0969
19. **A0A3Q1LPD0** Mass: 132257 Score: 36 Expect: 31 Matches: 14  
 Euchromatic histone lysine methyltransferase 1 OS=Bos taurus OX=9913 GN=EHTM1 PE=4 SV=1
- | Observed  | Mr(expt)  | Mr(calc)  | ppm    | Start | End | Miss | Ions | Peptide                               |
|-----------|-----------|-----------|--------|-------|-----|------|------|---------------------------------------|
| 842.4716  | 841.4643  | 841.4082  | 66.6   | 1153  | -   | 1159 | 0    | R.FYGNVSR.F                           |
| 848.4913  | 847.4840  | 847.4222  | 73.0   | 486   | -   | 492  | 1    | R.METPKSR.E                           |
| 953.4929  | 952.4856  | 952.5342  | -50.96 | 159   | -   | 168  | 1    | K.KAPAPGADV.V                         |
| 1019.6375 | 1018.6302 | 1018.5295 | 98.9   | 924   | -   | 932  | 1    | R.DSDVTLKNN.E                         |
| 1151.6821 | 1150.6748 | 1150.6169 | 50.4   | 271   | -   | 279  | 1    | K.QRTVIEMFK.S                         |
| 1211.5695 | 1210.5622 | 1210.5288 | 27.6   | 1143  | -   | 1152 | 0    | K.DGELYCIDAR.F                        |
| 1368.6882 | 1367.6809 | 1367.6317 | 36.0   | 198   | -   | 208  | 1    | R.DHEEPKEELSR.G                       |
| 1475.6868 | 1474.6795 | 1474.7086 | -19.71 | 339   | -   | 352  | 1    | R.ASKDGVLPDCSQK.V                     |
| 1479.7338 | 1478.7265 | 1478.8358 | -73.86 | 393   | -   | 405  | 1    | K.GKPDSPWIKPARK.R                     |
| 1567.6902 | 1566.6829 | 1566.8154 | -84.56 | 703   | -   | 715  | 1    | K.QLYFSARQGLQK.V                      |
| 1732.0293 | 1731.0220 | 1730.8675 | 89.3   | 1160  | -   | 1173 | 0    | R.FINHHCEPNLVPVR.V                    |
| 1732.0293 | 1731.0220 | 1730.8675 | 89.3   | 1160  | -   | 1173 | 0    | R.FINHHCEPNLVPVR.V                    |
| 1838.8518 | 1837.8445 | 1837.9244 | -43.46 | 273   | -   | 289  | 1    | R.TVIEMFKSITHSTGGSK.G + Oxidation (M) |
| 2872.3440 | 2871.3367 | 2871.4185 | -28.48 | 933   | -   | 958  | 0    | K.EGETPLQCSALNSQVWSALQVSQALR.D        |
- No match to: 835.4214, 850.5007, 853.4803, 853.4804, 864.5184, 868.5114, 868.5114, 870.5096, 882.5266, 882.5266, 951.5828, 972.5108, 982.5417, 996.5513, 1007.6395, 1017.6248, 1017.6248, 1031.5133, 1033.6567, 1033.6567, 1036.5132, 1045.5249, 1051.6622, 1051.6622, 1131.6577, 1133.6731, 1136.6519, 1147.6853, 1165.6888, 1165.6888, 1179.5533, 1194.5757, 1234.7560, 1236.6587, 1277.6544, 1279.7057, 1300.7963, 1302.8082, 1316.8273, 1334.8298, 1334.8298, 1349.6478, 1383.6498, 1402.7100, 1421.6836, 1434.8480, 1448.8584, 1448.8584, 1581.7833, 1581.7833, 1617.9998, 1617.9998, 1637.8650, 1707.7130, 1734.8334, 1900.9630, 1901.1735, 1993.8977, 2015.2006, 2184.3567, 2211.0339, 2215.0857, 2283.0969
20. **A0A4W2C1C0** Mass: 67085 Score: 36 Expect: 33 Matches: 5  
 Heparanase 2 (inactive) OS=Bos indicus x Bos taurus OX=30522 GN=HPSE2 PE=4 SV=1
- | Observed  | Mr(expt)  | Mr(calc)  | ppm    | Start | End | Miss | Ions | Peptide                         |
|-----------|-----------|-----------|--------|-------|-----|------|------|---------------------------------|
| 1236.6587 | 1235.6514 | 1235.6584 | -5.63  | 312   | -   | 322  | 0    | K.NVIALLDGFMK.V + Oxidation (M) |
| 1300.7963 | 1299.7890 | 1299.7047 | 64.8   | 299   | -   | 310  | 0    | R.ASLYGNIGRPR.K                 |
| 1732.0293 | 1731.0220 | 1730.8587 | 94.3   | 231   | -   | 246  | 0    | R.NPNNSWNSSALSLLK.Y             |
| 1732.0293 | 1731.0220 | 1730.8587 | 94.3   | 231   | -   | 246  | 0    | R.NPNNSWNSSALSLLK.Y             |
| 2872.3440 | 2871.3367 | 2871.5640 | -79.16 | 539   | -   | 564  | 0    | K.SVQLNGQPLVMVDDGTLPELKPRLR.A   |
- No match to: 835.4214, 842.4716, 848.4913, 850.5007, 853.4803, 853.4804, 864.5184, 868.5114, 868.5114, 870.5096, 882.5266, 882.5266, 951.5828, 953.4929, 972.5108, 982.5417, 996.5513, 1007.6395, 1017.6248, 1017.6248, 1019.6375, 1031.5133, 1033.6567, 1033.6567, 1036.5132, 1045.5249, 1051.6622, 1051.6622, 1131.6577, 1133.6731, 1136.6519, 1147.6853, 1151.6821, 1165.6888, 1165.6888, 1179.5533, 1194.5757, 1211.5695, 1234.7560, 1277.6544, 1279.7057, 1300.7963, 1302.8082, 1316.8273, 1334.8298, 1334.8298, 1349.6478, 1368.6882, 1383.6498, 1402.7100, 1421.6836, 1434.8480, 1448.8584, 1448.8584, 1475.6868, 1479.7338, 1567.6902, 1581.7833, 1581.7833, 1617.9998, 1617.9998, 1637.8650, 1707.7130, 1734.8334, 1838.8518, 1900.9630, 1901.1735, 1993.8977, 2015.2006, 2184.3567, 2211.0339, 2215.0857, 2283.0969
21. **O46770** Mass: 19686 Score: 35 Expect: 43 Matches: 5  
 MHC class I heavy chain (Fragment) OS=Bos taurus OX=9913 PE=2 SV=1
- | Observed  | Mr(expt)  | Mr(calc)  | ppm    | Start | End | Miss | Ions | Peptide                       |
|-----------|-----------|-----------|--------|-------|-----|------|------|-------------------------------|
| 1279.7057 | 1278.6984 | 1278.5993 | 77.5   | 142   | -   | 152  | 0    | K.WEAAGYAEVQR.N               |
| 1349.6478 | 1348.6405 | 1348.5983 | 31.3   | 106   | -   | 116  | 1    | R.RGFMQYGYDGR.D               |
| 1421.6836 | 1420.6763 | 1420.6834 | -4.99  | 127   | -   | 139  | 0    | R.SWTAGETAQITK.R              |
| 1567.6902 | 1566.6829 | 1566.7137 | -19.61 | 153   | -   | 164  | 0    | R.NYLEGECVEWLR.R              |
| 2872.3440 | 2871.3367 | 2871.1977 | 48.4   | 78    | -   | 103  | 0    | R.GYYNQSEAGSHTLQWMSGCDVGPDR.L |
- No match to: 835.4214, 842.4716, 848.4913, 850.5007, 853.4803, 853.4804, 864.5184, 868.5114, 868.5114, 870.5096, 882.5266, 882.5266, 951.5828, 953.4929, 972.5108, 982.5417, 996.5513, 1007.6395, 1017.6248, 1017.6248, 1019.6375, 1031.5133, 1033.6567, 1033.6567, 1036.5132, 1045.5249, 1051.6622, 1051.6622, 1131.6577, 1133.6731, 1136.6519, 1147.6853, 1151.6821, 1165.6888, 1165.6888, 1179.5533, 1194.5757, 1211.5695, 1234.7560, 1236.6587, 1277.6544, 1300.7963, 1302.8082, 1316.8273, 1334.8298, 1334.8298, 1349.6478, 1368.6882, 1383.6498, 1402.7100, 1421.6836, 1434.8480, 1448.8584, 1448.8584, 1475.6868, 1479.7338, 1567.6902, 1581.7833, 1581.7833, 1617.9998, 1617.9998, 1637.8650, 1707.7130, 1732.0293, 1732.0293, 1734.8334, 1838.8518, 1900.9630, 1901.1735, 1993.8977, 2015.2006, 2184.3567, 2211.0339, 2215.0857, 2283.0969
22. **U5TGS8** Mass: 86845 Score: 34 Expect: 48 Matches: 10  
 CPXV068 protein OS=Cowpox virus OX=10243 GN=CPXV068 PE=4 SV=1
- | Observed  | Mr(expt)  | Mr(calc)  | ppm    | Start | End | Miss | Ions | Peptide                           |
|-----------|-----------|-----------|--------|-------|-----|------|------|-----------------------------------|
| 842.4716  | 841.4643  | 841.4909  | -31.59 | 511   | -   | 518  | 0    | K.IDSIPGLK.T                      |
| 848.4913  | 847.4840  | 847.4803  | 4.34   | 223   | -   | 229  | 0    | R.FLDIVNMK.N                      |
| 850.5007  | 849.4934  | 849.4266  | 78.7   | 714   | -   | 720  | 0    | K.TLSLCEK.V                       |
| 1368.6882 | 1367.6809 | 1367.5495 | 96.1   | 417   | -   | 426  | 1    | K.YGFCPPMMMKR.L + 3 Oxidation (M) |
| 1402.7100 | 1401.7027 | 1401.7292 | -18.90 | 561   | -   | 572  | 0    | R.LASYGLYYIPSR.Y                  |
| 1421.6836 | 1420.6763 | 1420.6544 | 15.4   | 519   | -   | 529  | 1    | K.TYNNMKDITYEK.S + Oxidation (M)  |
| 1479.7338 | 1478.7265 | 1478.7803 | -36.35 | 511   | -   | 523  | 1    | K.IDSIPGLKTYNMK.D                 |
| 1900.9630 | 1899.9557 | 1899.9149 | 21.5   | 491   | -   | 506  | 1    | K.TNRVLCFDSLENSAFK.S              |
| 2015.2006 | 2014.1933 | 2014.0292 | 81.5   | 674   | -   | 691  | 0    | K.INELLSEPVSGVCIELDK.I            |
| 2872.3440 | 2871.3367 | 2871.4793 | -49.66 | 265   | -   | 289  | 1    | R.TEDLGIYANIFFEDAIDITKLEITK.T     |
- No match to: 835.4214, 853.4803, 853.4804, 864.5184, 868.5114, 868.5114, 870.5096, 882.5266, 882.5266, 951.5828, 953.4929, 972.5108, 982.5417, 996.5513, 1007.6395, 1017.6248, 1017.6248, 1019.6375, 1031.5133, 1033.6567, 1033.6567, 1036.5132,

1045.5249, 1051.6622, 1051.6622, 1131.6577, 1133.6731, 1136.6519, 1147.6853, 1151.6821, 1165.6888, 1165.6888, 1179.5533, 1194.5757, 1211.5695, 1234.7560, 1236.6587, 1277.6544, 1279.7057, 1300.7963, 1302.8082, 1316.8273, 1334.8298, 1334.8298, 1349.6478, 1383.6498, 1434.8480, 1448.8584, 1448.8584, 1475.6868, 1567.6902, 1581.7833, 1581.7833, 1617.9998, 1617.9998, 1637.8650, 1707.7130, 1732.0293, 1732.0293, 1734.8334, 1838.8518, 1901.1735, 1993.8977, 2184.3567, 2211.0339, 2215.0857, 2283.0969

23. [A0A4W2CHB4](#)    **Mass:** 38688    **Score:** 34    **Expect:** 50    **Matches:** 9

Glutathione S-transferase omega 1 OS=Bos indicus x Bos taurus OX=30522 GN=GSTO1 PE=3 SV=1

| Observed  | Mr(expt)  | Mr(calc)  | ppm    | Start | End   | Miss | Ions | Peptide                |
|-----------|-----------|-----------|--------|-------|-------|------|------|------------------------|
| 850.5007  | 849.4934  | 849.4241  | 81.6   | 304   | - 310 | 0    | ---  | K.LWMAAMK.K            |
| 870.5096  | 869.5023  | 869.5811  | -90.54 | 140   | - 146 | 1    | ---  | K.RTLLVLRL.A           |
| 1031.5133 | 1030.5060 | 1030.5335 | -26.66 | 205   | - 213 | 0    | ---  | K.LLPGDPYK.A           |
| 1279.7057 | 1278.6984 | 1278.5874 | 86.8   | 236   | - 246 | 1    | ---  | R.TQNKEDCSGLK.E        |
| 1300.7963 | 1299.7890 | 1299.6969 | 70.9   | 68    | - 79  | 1    | ---  | R.ADGCPSLALLRK.I       |
| 1402.7100 | 1401.7027 | 1401.7715 | -49.07 | 311   | - 323 | 1    | ---  | K.KDPTVSSLLTDVK.T      |
| 1421.6836 | 1420.6763 | 1420.6631 | 9.28   | 129   | - 139 | 1    | ---  | R.VYSMRFCPYAK.R        |
| 1732.0293 | 1731.0220 | 1730.9679 | 31.3   | 111   | - 128 | 1    | ---  | R.SLGKGSAPPGPVPEGLIR.V |
| 1732.0293 | 1731.0220 | 1730.9679 | 31.3   | 111   | - 128 | 1    | ---  | R.SLGKGSAPPGPVPEGLIR.V |

No match to: 835.4214, 842.4716, 848.4913, 853.4803, 853.4804, 864.5184, 868.5114, 868.5114, 882.5266, 882.5266, 951.5828, 953.4929, 972.5108, 982.5417, 996.5513, 1007.6395, 1017.6248, 1017.6248, 1019.6375, 1033.6567, 1033.6567, 1036.5132, 1045.5249, 1051.6622, 1051.6622, 1131.6577, 1133.6731, 1136.6519, 1147.6853, 1151.6821, 1165.6888, 1165.6888, 1179.5533, 1194.5757, 1211.5695, 1234.7560, 1236.6587, 1277.6544, 1302.8082, 1316.8273, 1334.8298, 1334.8298, 1349.6478, 1368.6882, 1383.6498, 1434.8480, 1448.8584, 1448.8584, 1475.6868, 1479.7338, 1567.6902, 1581.7833, 1581.7833, 1617.9998, 1617.9998, 1637.8650, 1707.7130, 1734.8334, 1838.8518, 1900.9630, 1901.1735, 1993.8977, 2015.2006, 2184.3567, 2211.0339, 2215.0857, 2283.0969, 2872.3440

24. [A0A4W2FWN4](#)    **Mass:** 38719    **Score:** 34    **Expect:** 50    **Matches:** 9

Glutathione S-transferase omega 1 OS=Bos indicus x Bos taurus OX=30522 GN=GSTO1 PE=3 SV=1

| Observed  | Mr(expt)  | Mr(calc)  | ppm    | Start | End   | Miss | Ions | Peptide                |
|-----------|-----------|-----------|--------|-------|-------|------|------|------------------------|
| 850.5007  | 849.4934  | 849.4241  | 81.6   | 304   | - 310 | 0    | ---  | K.LWMAAMK.K            |
| 870.5096  | 869.5023  | 869.5811  | -90.54 | 140   | - 146 | 1    | ---  | K.RTLLVLRL.A           |
| 1031.5133 | 1030.5060 | 1030.5335 | -26.66 | 205   | - 213 | 0    | ---  | K.LLPGDPYK.A           |
| 1279.7057 | 1278.6984 | 1278.5874 | 86.8   | 236   | - 246 | 1    | ---  | R.TQNKEDCSGLK.E        |
| 1300.7963 | 1299.7890 | 1299.6969 | 70.9   | 68    | - 79  | 1    | ---  | R.ADGCPSLALLRK.I       |
| 1402.7100 | 1401.7027 | 1401.7715 | -49.07 | 311   | - 323 | 1    | ---  | K.KDPTVSSLLTDVK.T      |
| 1421.6836 | 1420.6763 | 1420.6631 | 9.28   | 129   | - 139 | 1    | ---  | R.VYSMRFCPYAK.R        |
| 1732.0293 | 1731.0220 | 1730.9679 | 31.3   | 111   | - 128 | 1    | ---  | R.SLGKGSAPPGPVPEGLIR.V |
| 1732.0293 | 1731.0220 | 1730.9679 | 31.3   | 111   | - 128 | 1    | ---  | R.SLGKGSAPPGPVPEGLIR.V |

No match to: 835.4214, 842.4716, 848.4913, 853.4803, 853.4804, 864.5184, 868.5114, 868.5114, 882.5266, 882.5266, 951.5828, 953.4929, 972.5108, 982.5417, 996.5513, 1007.6395, 1017.6248, 1017.6248, 1019.6375, 1033.6567, 1033.6567, 1036.5132, 1045.5249, 1051.6622, 1051.6622, 1131.6577, 1133.6731, 1136.6519, 1147.6853, 1151.6821, 1165.6888, 1165.6888, 1179.5533, 1194.5757, 1211.5695, 1234.7560, 1236.6587, 1277.6544, 1302.8082, 1316.8273, 1334.8298, 1334.8298, 1349.6478, 1368.6882, 1383.6498, 1434.8480, 1448.8584, 1448.8584, 1475.6868, 1479.7338, 1567.6902, 1581.7833, 1581.7833, 1617.9998, 1617.9998, 1637.8650, 1707.7130, 1734.8334, 1838.8518, 1900.9630, 1901.1735, 1993.8977, 2015.2006, 2184.3567, 2211.0339, 2215.0857, 2283.0969, 2872.3440

25. [A0A0K2YTL5](#)    **Mass:** 9022    **Score:** 34    **Expect:** 51    **Matches:** 5

Uncharacterized protein OS=Cowpox virus OX=10243 GN=gCPXV0248 PE=4 SV=1

| Observed  | Mr(expt)  | Mr(calc)  | ppm    | Start | End  | Miss | Ions | Peptide                      |
|-----------|-----------|-----------|--------|-------|------|------|------|------------------------------|
| 1036.5132 | 1035.5059 | 1035.5501 | -42.70 | 72    | - 79 | 0    | ---  | K.FNLYRPNL.-                 |
| 1131.6577 | 1130.6504 | 1130.6270 | 20.7   | 31    | - 39 | 0    | ---  | K.YIVLMIHR.V + Oxidation (M) |
| 1277.6544 | 1276.6471 | 1276.7292 | -64.25 | 70    | - 79 | 1    | ---  | R.LKFNLYRPNL.-               |
| 1334.8298 | 1333.8225 | 1333.7275 | 71.2   | 58    | - 69 | 0    | ---  | R.STMELILLTASR.L             |
| 1334.8298 | 1333.8226 | 1333.7275 | 71.3   | 58    | - 69 | 0    | ---  | R.STMELILLTASR.L             |

No match to: 835.4214, 842.4716, 848.4913, 850.5007, 853.4803, 853.4804, 864.5184, 868.5114, 868.5114, 870.5096, 882.5266, 882.5266, 951.5828, 953.4929, 972.5108, 982.5417, 996.5513, 1007.6395, 1017.6248, 1017.6248, 1019.6375, 1031.5133, 1033.6567, 1033.6567, 1045.5249, 1051.6622, 1051.6622, 1133.6731, 1136.6519, 1147.6853, 1151.6821, 1165.6888, 1165.6888, 1179.5533, 1194.5757, 1211.5695, 1234.7560, 1236.6587, 1279.7057, 1300.7963, 1302.8082, 1316.8273, 1349.6478, 1368.6882, 1383.6498, 1402.7100, 1421.6836, 1434.8480, 1448.8584, 1448.8584, 1475.6868, 1479.7338, 1567.6902, 1581.7833, 1581.7833, 1617.9998, 1617.9998, 1637.8650, 1707.7130, 1732.0293, 1732.0293, 1734.8334, 1838.8518, 1900.9630, 1901.1735, 1993.8977, 2015.2006, 2184.3567, 2211.0339, 2215.0857, 2283.0969, 2872.3440

26. [O46724](#)    **Mass:** 19602    **Score:** 34    **Expect:** 51    **Matches:** 5

MHC class I heavy chain (Fragment) OS=Bos taurus OX=9913 PE=2 SV=1

| Observed  | Mr(expt)  | Mr(calc)  | ppm    | Start | End   | Miss | Ions | Peptide                        |
|-----------|-----------|-----------|--------|-------|-------|------|------|--------------------------------|
| 1279.7057 | 1278.6984 | 1278.5993 | 77.5   | 142   | - 152 | 0    | ---  | K.WEAAGYAEVQR.N                |
| 1349.6478 | 1348.6405 | 1348.5983 | 31.3   | 106   | - 116 | 1    | ---  | R.RGFMQYGYDGR.D                |
| 1421.6836 | 1420.6763 | 1420.6834 | -4.99  | 127   | - 139 | 0    | ---  | R.SWTAGETEAQITK.R              |
| 1567.6902 | 1566.6829 | 1566.7137 | -19.61 | 153   | - 164 | 0    | ---  | R.NYLEGECVEWLR.R               |
| 2872.3440 | 2871.3367 | 2871.1977 | 48.4   | 78    | - 103 | 0    | ---  | R.GYYNQSEAGSHTLQWMSGCDVGPDGR.L |

No match to: 835.4214, 842.4716, 848.4913, 850.5007, 853.4803, 853.4804, 864.5184, 868.5114, 868.5114, 870.5096, 882.5266, 882.5266, 951.5828, 953.4929, 972.5108, 982.5417, 996.5513, 1007.6395, 1017.6248, 1017.6248, 1019.6375, 1031.5133, 1033.6567, 1033.6567, 1036.5132, 1045.5249, 1051.6622, 1051.6622, 1131.6577, 1133.6731, 1136.6519, 1147.6853, 1151.6821, 1165.6888, 1165.6888, 1179.5533, 1194.5757, 1211.5695, 1234.7560, 1236.6587, 1277.6544, 1300.7963, 1302.8082, 1316.8273, 1334.8298, 1334.8298, 1368.6882, 1383.6498, 1402.7100, 1434.8480, 1448.8584, 1448.8584, 1475.6868, 1479.7338, 1567.6902, 1581.7833, 1581.7833, 1617.9998, 1617.9998, 1637.8650, 1707.7130, 1732.0293, 1732.0293, 1734.8334, 1838.8518, 1900.9630, 1901.1735, 1993.8977, 2015.2006, 2184.3567, 2211.0339, 2215.0857, 2283.0969

27. [O46765](#)    **Mass:** 19602    **Score:** 34    **Expect:** 51    **Matches:** 5

MHC class I heavy chain (Fragment) OS=Bos taurus OX=9913 PE=2 SV=1

| Observed  | Mr(expt)  | Mr(calc)  | ppm    | Start | End   | Miss | Ions | Peptide                        |
|-----------|-----------|-----------|--------|-------|-------|------|------|--------------------------------|
| 1279.7057 | 1278.6984 | 1278.5993 | 77.5   | 142   | - 152 | 0    | ---  | K.WEAAGYAEVQR.N                |
| 1349.6478 | 1348.6405 | 1348.5983 | 31.3   | 106   | - 116 | 1    | ---  | R.RGFMQYGYDGR.D                |
| 1421.6836 | 1420.6763 | 1420.6834 | -4.99  | 127   | - 139 | 0    | ---  | R.SWTAGETEAQITK.R              |
| 1567.6902 | 1566.6829 | 1566.7137 | -19.61 | 153   | - 164 | 0    | ---  | R.NYLEGECVEWLR.R               |
| 2872.3440 | 2871.3367 | 2871.1977 | 48.4   | 78    | - 103 | 0    | ---  | R.GYYNQSEAGSHTLQWMSGCDVGPDGR.L |

No match to: 835.4214, 842.4716, 848.4913, 850.5007, 853.4803, 853.4804, 864.5184, 868.5114, 868.5114, 870.5096, 882.5266, 882.5266, 951.5828, 953.4929, 972.5108, 982.5417, 996.5513, 1007.6395, 1017.6248, 1017.6248, 1019.6375, 1031.5133, 1033.6567, 1033.6567, 1036.5132, 1045.5249, 1051.6622, 1051.6622, 1131.6577, 1133.6731, 1136.6519, 1147.6853, 1151.6821, 1165.6888, 1165.6888, 1179.5533, 1194.5757, 1211.5695, 1234.7560, 1236.6587, 1277.6544, 1300.7963, 1302.8082, 1316.8273, 1334.8298, 1334.8298, 1368.6882, 1383.6498, 1402.7100, 1434.8480, 1448.8584, 1448.8584, 1475.6868, 1479.7338, 1567.6902, 1581.7833, 1581.7833, 1617.9998, 1617.9998, 1637.8650, 1707.7130, 1732.0293, 1732.0293, 1734.8334, 1838.8518, 1900.9630, 1901.1735, 1993.8977, 2015.2006, 2184.3567, 2211.0339, 2215.0857, 2283.0969

28. [A0A4W2BML3](#)    **Mass:** 25099    **Score:** 34    **Expect:** 52    **Matches:** 7

HESX homeobox 1 OS=Bos indicus x Bos taurus OX=30522 GN=HESX1 PE=4 SV=1

| Observed | Mr(expt) | Mr(calc) | ppm | Start | End | Miss | Ions | Peptide |
|----------|----------|----------|-----|-------|-----|------|------|---------|
|----------|----------|----------|-----|-------|-----|------|------|---------|

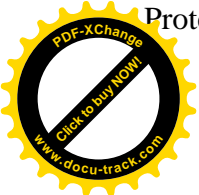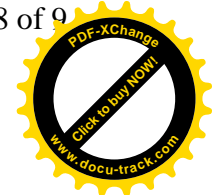

```

853.4803 852.4730 852.4130 70.4 132 - 137 0 --- R.ELSWYR.G
853.4804 852.4731 852.4130 70.5 132 - 137 0 --- R.ELSWYR.G
953.4929 952.4856 952.4688 17.7 199 - 206 0 --- R.ESQFLMAK.K
1131.6577 1130.6504 1130.5502 88.6 1 - 9 1 --- -.MQPDSELR.L
1136.6519 1135.6446 1135.6237 18.4 35 - 45 1 --- K.PSGAIGKSLEK.R
1349.6478 1348.6405 1348.6557 -11.29 196 - 206 1 --- R.SHRESQFLMAK.K + Oxidation (M)
1383.6498 1382.6425 1382.6678 -18.27 23 - 34 0 --- K.DTDLHDITTPQK.F
No match to: 835.4214, 842.4716, 848.4913, 850.5007, 864.5184, 868.5114, 868.5114, 870.5096, 882.5266, 882.5266, 951.5828,
972.5108, 982.5417, 996.5513, 1007.6395, 1017.6248, 1017.6248, 1019.6375, 1031.5133, 1033.6567, 1033.6567, 1036.5132,
1045.5249, 1051.6622, 1051.6622, 1133.6731, 1147.6853, 1151.6821, 1165.6888, 1165.6888, 1179.5533, 1194.5757, 1211.5695,
1234.7560, 1236.6587, 1277.6544, 1279.7057, 1300.7963, 1302.8082, 1316.8273, 1334.8298, 1334.8298, 1368.6882, 1402.7100,
1421.6836, 1434.8480, 1448.8584, 1448.8584, 1475.6868, 1479.7338, 1567.6902, 1581.7833, 1581.7833, 1617.9998, 1617.9998,
1637.8650, 1707.7130, 1732.0293, 1732.0293, 1734.8334, 1838.8518, 1900.9630, 1901.1735, 1993.8977, 2015.2006, 2184.3567,
2211.0339, 2215.0857, 2283.0969, 2872.3440

```

29. [A0A4W2E8V9](#) Mass: 138235 Score: 34 Expect: 52 Matches: 14

Euchromatic histone lysine methyltransferase 1 OS=Bos indicus x Bos taurus OX=30522 GN=EHTM1 PE=4 SV=1

| Observed  | Mr(expt)  | Mr(calc)  | ppm    | Start | End  | Miss | Ions | Peptide                               |
|-----------|-----------|-----------|--------|-------|------|------|------|---------------------------------------|
| 842.4716  | 841.4643  | 841.4082  | 66.6   | 1153  | 1159 | 0    | ---  | R.FYGNVSR.F                           |
| 848.4913  | 847.4840  | 847.4222  | 73.0   | 486   | 492  | 1    | ---  | R.METPKSR.E                           |
| 953.4929  | 952.4856  | 952.5342  | -50.96 | 159   | 168  | 1    | ---  | K.KAPAPGADVK.V                        |
| 1019.6375 | 1018.6302 | 1018.5295 | 98.9   | 924   | 932  | 1    | ---  | R.DSDVTLKKN.E                         |
| 1151.6821 | 1150.6748 | 1150.6169 | 50.4   | 271   | 279  | 1    | ---  | K.QRTVIEMFK.S                         |
| 1211.5695 | 1210.5622 | 1210.5587 | 2.91   | 1215  | 1224 | 1    | ---  | K.LFSCRCGSPK.C                        |
| 1368.6882 | 1367.6809 | 1367.6317 | 36.0   | 198   | 208  | 1    | ---  | R.DHEEPKEELSR.G                       |
| 1475.6868 | 1474.6795 | 1474.7086 | -19.71 | 339   | 352  | 1    | ---  | R.ASKDGVLPADCSQK.V                    |
| 1479.7338 | 1478.7265 | 1478.8358 | -73.86 | 393   | 405  | 1    | ---  | K.GKPDSPWIKPARK.R                     |
| 1567.6902 | 1566.6829 | 1566.8154 | -84.56 | 703   | 715  | 1    | ---  | K.QLYFSARQGLQK.V                      |
| 1732.0293 | 1731.0220 | 1730.8675 | 89.3   | 1160  | 1173 | 0    | ---  | R.FINHHCEPNLVPVR.V                    |
| 1732.0293 | 1731.0220 | 1730.8675 | 89.3   | 1160  | 1173 | 0    | ---  | R.FINHHCEPNLVPVR.V                    |
| 1838.8518 | 1837.8445 | 1837.9244 | -43.46 | 273   | 289  | 1    | ---  | R.TVIEMFKSITHSTGGSK.G + Oxidation (M) |
| 2872.3440 | 2871.3367 | 2871.4185 | -28.48 | 933   | 958  | 0    | ---  | K.EGETPLQCASLNSQVWSALQVSQALR.D        |

No match to: 835.4214, 850.5007, 853.4803, 853.4804, 864.5184, 868.5114, 868.5114, 870.5096, 882.5266, 882.5266, 951.5828, 972.5108, 982.5417, 996.5513, 1007.6395, 1017.6248, 1017.6248, 1019.6375, 1031.5133, 1033.6567, 1033.6567, 1036.5132, 1045.5249, 1051.6622, 1051.6622, 1131.6577, 1133.6731, 1136.6519, 1147.6853, 1165.6888, 1165.6888, 1179.5533, 1194.5757, 1234.7560, 1236.6587, 1277.6544, 1279.7057, 1300.7963, 1302.8082, 1316.8273, 1334.8298, 1334.8298, 1349.6478, 1383.6498, 1402.7100, 1421.6836, 1434.8480, 1448.8584, 1448.8584, 1581.7833, 1581.7833, 1617.9998, 1617.9998, 1637.8650, 1707.7130, 1734.8334, 1900.9630, 1901.1735, 1993.8977, 2015.2006, 2184.3567, 2211.0339, 2215.0857, 2283.0969

30. [A0A3Q1MVR5](#) Mass: 138235 Score: 34 Expect: 52 Matches: 14

Euchromatic histone lysine methyltransferase 1 OS=Bos taurus OX=9913 GN=EHTM1 PE=4 SV=1

| Observed  | Mr(expt)  | Mr(calc)  | ppm    | Start | End  | Miss | Ions | Peptide                               |
|-----------|-----------|-----------|--------|-------|------|------|------|---------------------------------------|
| 842.4716  | 841.4643  | 841.4082  | 66.6   | 1153  | 1159 | 0    | ---  | R.FYGNVSR.F                           |
| 848.4913  | 847.4840  | 847.4222  | 73.0   | 486   | 492  | 1    | ---  | R.METPKSR.E                           |
| 953.4929  | 952.4856  | 952.5342  | -50.96 | 159   | 168  | 1    | ---  | K.KAPAPGADVK.V                        |
| 1019.6375 | 1018.6302 | 1018.5295 | 98.9   | 924   | 932  | 1    | ---  | R.DSDVTLKKN.E                         |
| 1151.6821 | 1150.6748 | 1150.6169 | 50.4   | 271   | 279  | 1    | ---  | K.QRTVIEMFK.S                         |
| 1211.5695 | 1210.5622 | 1210.5587 | 2.91   | 1215  | 1224 | 1    | ---  | K.LFSCRCGSPK.C                        |
| 1368.6882 | 1367.6809 | 1367.6317 | 36.0   | 198   | 208  | 1    | ---  | R.DHEEPKEELSR.G                       |
| 1475.6868 | 1474.6795 | 1474.7086 | -19.71 | 339   | 352  | 1    | ---  | R.ASKDGVLPADCSQK.V                    |
| 1479.7338 | 1478.7265 | 1478.8358 | -73.86 | 393   | 405  | 1    | ---  | K.GKPDSPWIKPARK.R                     |
| 1567.6902 | 1566.6829 | 1566.8154 | -84.56 | 703   | 715  | 1    | ---  | K.QLYFSARQGLQK.V                      |
| 1732.0293 | 1731.0220 | 1730.8675 | 89.3   | 1160  | 1173 | 0    | ---  | R.FINHHCEPNLVPVR.V                    |
| 1732.0293 | 1731.0220 | 1730.8675 | 89.3   | 1160  | 1173 | 0    | ---  | R.FINHHCEPNLVPVR.V                    |
| 1838.8518 | 1837.8445 | 1837.9244 | -43.46 | 273   | 289  | 1    | ---  | R.TVIEMFKSITHSTGGSK.G + Oxidation (M) |
| 2872.3440 | 2871.3367 | 2871.4185 | -28.48 | 933   | 958  | 0    | ---  | K.EGETPLQCASLNSQVWSALQVSQALR.D        |

No match to: 835.4214, 850.5007, 853.4803, 853.4804, 864.5184, 868.5114, 868.5114, 870.5096, 882.5266, 882.5266, 951.5828, 972.5108, 982.5417, 996.5513, 1007.6395, 1017.6248, 1017.6248, 1019.6375, 1031.5133, 1033.6567, 1033.6567, 1036.5132, 1045.5249, 1051.6622, 1051.6622, 1131.6577, 1133.6731, 1136.6519, 1147.6853, 1165.6888, 1165.6888, 1179.5533, 1194.5757, 1234.7560, 1236.6587, 1277.6544, 1279.7057, 1300.7963, 1302.8082, 1316.8273, 1334.8298, 1334.8298, 1349.6478, 1383.6498, 1402.7100, 1421.6836, 1434.8480, 1448.8584, 1448.8584, 1581.7833, 1581.7833, 1617.9998, 1617.9998, 1637.8650, 1707.7130, 1734.8334, 1900.9630, 1901.1735, 1993.8977, 2015.2006, 2184.3567, 2211.0339, 2215.0857, 2283.0969

## Search Parameters

Type of search : Sequence Query  
 Enzyme : Trypsin  
 Fixed modifications : [Carbamidomethyl \(C\)](#)  
 Variable modifications : [Oxidation \(M\)](#)  
 Mass values : Monoisotopic  
 Protein Mass : Unrestricted  
 Peptide Mass Tolerance : ± 100 ppm  
 Fragment Mass Tolerance : ± 0.3 Da  
 Max Missed Cleavages : 1  
 Instrument type : MALDI-TOF-TOF

Query1 (835.4214,1+): <no title>  
 Query2 (842.4716,1+): <no title>  
 Query3 (848.4913,1+): <no title>  
 Query4 (850.5007,1+): <no title>  
 Query5 (853.4803,1+): <no title>  
 Query6 (853.4804,1+): Locus:1..14.0.8  
 Query7 (864.5184,1+): <no title>  
 Query8 (868.5114,1+): <no title>  
 Query9 (868.5114,1+): Locus:1..14.0.10  
 Query10 (870.5096,1+): <no title>  
 Query11 (882.5266,1+): <no title>  
 Query12 (882.5266,1+): Locus:1..14.0.4  
 Query13 (951.5828,1+): <no title>  
 Query14 (953.4929,1+): <no title>  
 Query15 (972.5108,1+): <no title>  
 Query16 (982.5417,1+): <no title>  
 Query17 (996.5513,1+): <no title>  
 Query18 (1007.6395,1+): <no title>  
 Query19 (1017.6248,1+): Locus:1..14.0.7  
 Query20 (1017.6248,1+): <no title>  
 Query21 (1019.6375,1+): <no title>  
 Query22 (1031.5133,1+): <no title>  
 Query23 (1033.6567,1+): <no title>



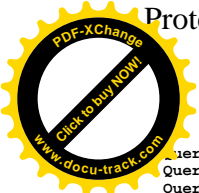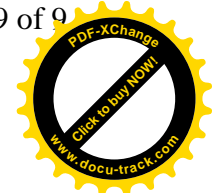

Query24 (1033.6567,1+): Locus:1..14.0.11  
Query25 (1036.5132,1+): <no title>  
Query26 (1045.5249,1+): <no title>  
Query27 (1051.6622,1+): <no title>  
Query28 (1051.6622,1+): Locus:1..14.0.1  
Query29 (1131.6577,1+): <no title>  
Query30 (1133.6731,1+): <no title>  
Query31 (1136.6519,1+): <no title>  
Query32 (1147.6853,1+): <no title>  
Query33 (1151.6821,1+): <no title>  
Query34 (1165.6888,1+): <no title>  
Query35 (1165.6888,1+): Locus:1..14.0.6  
Query36 (1179.5533,1+): <no title>  
Query37 (1194.5757,1+): <no title>  
Query38 (1211.5695,1+): <no title>  
Query39 (1234.7560,1+): <no title>  
Query40 (1236.6587,1+): <no title>  
Query41 (1277.6544,1+): <no title>  
Query42 (1279.7057,1+): <no title>  
Query43 (1300.7963,1+): <no title>  
Query44 (1302.8082,1+): <no title>  
Query45 (1316.8273,1+): <no title>  
Query46 (1334.8298,1+): <no title>  
Query47 (1334.8298,1+): Locus:1..14.0.3  
Query48 (1349.6478,1+): <no title>  
Query49 (1368.6882,1+): <no title>  
Query50 (1383.6498,1+): <no title>  
Query51 (1402.7100,1+): <no title>  
Query52 (1421.6836,1+): <no title>  
Query53 (1434.8480,1+): <no title>  
Query54 (1448.8584,1+): <no title>  
Query55 (1448.8584,1+): Locus:1..14.0.9  
Query56 (1475.6868,1+): <no title>  
Query57 (1479.7338,1+): <no title>  
Query58 (1567.6902,1+): <no title>  
Query59 (1581.7833,1+): <no title>  
Query60 (1581.7833,1+): Locus:1..14.0.2  
Query61 (1617.9998,1+): Locus:1..14.0.5  
Query62 (1617.9998,1+): <no title>  
Query63 (1637.8650,1+): <no title>  
Query64 (1707.7130,1+): <no title>  
Query65 (1732.0293,1+): <no title>  
Query66 (1732.0293,1+): Locus:1..14.0.12  
Query67 (1734.8334,1+): <no title>  
Query68 (1838.8518,1+): <no title>  
Query69 (1900.9630,1+): <no title>  
Query70 (1901.1735,1+): <no title>  
Query71 (1993.8977,1+): <no title>  
Query72 (2015.2006,1+): <no title>  
Query73 (2184.3567,1+): <no title>  
Query74 (2211.0339,1+): <no title>  
Query75 (2215.0857,1+): <no title>  
Query76 (2283.0969,1+): <no title>  
Query77 (2872.3440,1+): <no title>

Mascot: <http://www.matrixscience.com/>
