# Supplementary material for: Alpha-2-Macroglobulin as a New Promising Biomarker Improving the Diagnostic Sensitivity of Bovine Paratuberculosis
Source: Frontiers journal article supplement (doi:10.3389/fvets.2021.637716), 2021-03-05
Supplement: Data_Sheet_1.zip [file Data_Sheet_1.zip]

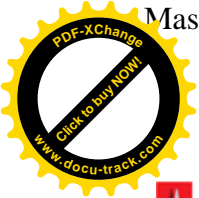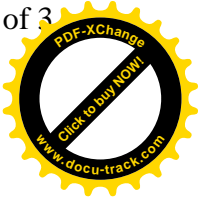

# MASCOT Search Results

## Protein View: V6F7X3

Apolipoprotein A-IV OS=Bos taurus OX=9913 GN=APOA4 PE=3 SV=1

Database: Uniprot\_bovine  
Score: 283  
Expect: 6.7e-024  
Nominal mass (M<sub>r</sub>): 42963  
Calculated pI: 5.30

Sequence similarity is available as [an NCBI BLAST search of V6F7X3 against nr.](#)

### Search parameters

Enzyme: Trypsin: cuts C-term side of KR unless next residue is P.  
Fixed modifications: [Carbamidomethyl \(C\)](#)  
Variable modifications: [Oxidation \(M\)](#)

Protein sequence coverage: 41%

Matched peptides shown in **bold red**.

1 MFLKAVVLSL ALVAVTGAEA EVNADQVATV IWDYFSQLGN NAKKAVEHIQ  
51 **KSEL****TQQLNT** **LPQDK**LGEVS TYTDDLQKKL **VPFATELHER** LTKDSEKLKE  
101 EIRKELEDLR ARLLPHATEV SQKIGDNVRE LQQR**LGPYAE** **ELRTQVDTQA**  
151 **QQLRRQLTPY** **AERMEKVMRQ** **NLDQLQASLA** **PYAEELQATV** **NQRVEELKGR**  
201 **LTPYADQLQT** **KIEENVEELR** RSLAPYAQDV QGK**LNHQLEG** **LAFQMKKHAE**  
251 ELKAKISAKA EELRQGLVPL VNSVHGSQLG NAEDLQK**SLA** **ELSSRLDQQV**  
301 **EDFRRTVG****PGY** **GETFNKAMVQ** **QLDTLRQKLG** **PLAGDVEDHL** **SFLEKDLRDK**  
351 VSSFFNTLKE KESQAPALPA QEEMPVPLGG

Unformatted sequence string: [380 residues](#) (for pasting into other applications).

Sort peptides by ☒ Residue Number ☐ Increasing Mass ☐ Decreasing Mass

Show predicted peptides also

| Query              | Start - End | Observed  | Mr(expt)  | Mr(calc)  | ppm   | M | Score | Peptide                               |
|--------------------|-------------|-----------|-----------|-----------|-------|---|-------|---------------------------------------|
| <a href="#">61</a> | 52 - 65     | 1664.7775 | 1663.7702 | 1663.8417 | -43.0 | 0 |       | <b>K.SELTQQLNTLFPQDK.L</b>            |
| <a href="#">56</a> | 79 - 90     | 1439.7417 | 1438.7344 | 1438.7932 | -40.9 | 1 |       | <b>K.KLVVPFATELHER.L</b>              |
| <a href="#">52</a> | 80 - 90     | 1311.6462 | 1310.6389 | 1310.6983 | -45.3 | 0 |       | <b>K.LVPFATELHER.L</b>                |
| <a href="#">53</a> | 80 - 90     | 1311.6462 | 1310.6390 | 1310.6983 | -45.2 | 0 | 14    | <b>K.LVPFATELHER.L</b>                |
| <a href="#">26</a> | 135 - 143   | 1047.4978 | 1046.4905 | 1046.5396 | -46.9 | 0 |       | <b>R.LGPYAEELR.T</b>                  |
| <a href="#">27</a> | 135 - 143   | 1047.4978 | 1046.4905 | 1046.5396 | -46.9 | 0 | 20    | <b>R.LGPYAEELR.T</b>                  |
| <a href="#">48</a> | 144 - 154   | 1287.6068 | 1286.5995 | 1286.6579 | -45.4 | 0 |       | <b>R.TQVDTQAQQLR.R</b>                |
| <a href="#">49</a> | 144 - 154   | 1287.6068 | 1286.5995 | 1286.6579 | -45.3 | 0 | 14    | <b>R.TQVDTQAQQLR.R</b>                |
| <a href="#">31</a> | 155 - 163   | 1133.5562 | 1132.5489 | 1132.5989 | -44.1 | 1 |       | <b>R.RQLTPYAER.M</b>                  |
| <a href="#">18</a> | 156 - 163   | 977.4595  | 976.4522  | 976.4978  | -46.6 | 0 |       | <b>R.QLTPYAER.M</b>                   |
| <a href="#">19</a> | 156 - 163   | 977.4595  | 976.4523  | 976.4978  | -46.6 | 0 | 15    | <b>R.QLTPYAER.M</b>                   |
| <a href="#">75</a> | 170 - 193   | 2700.2822 | 2699.2749 | 2699.3514 | -28.3 | 0 |       | <b>R.QNLDQLQASLAPYAEELQATVNQR.V</b>   |
| <a href="#">76</a> | 170 - 193   | 2700.2822 | 2699.2750 | 2699.3514 | -28.3 | 0 | 36    | <b>R.QNLDQLQASLAPYAEELQATVNQR.V</b>   |
| <a href="#">47</a> | 201 - 211   | 1277.6251 | 1276.6178 | 1276.6663 | -38.0 | 0 |       | <b>R.LTPYADQLQTK.I</b>                |
| <a href="#">59</a> | 234 - 246   | 1528.7235 | 1527.7162 | 1527.7868 | -46.2 | 0 |       | <b>K.LNHQLEGLAFQMK.K</b>              |
| <a href="#">7</a>  | 288 - 295   | 862.4257  | 861.4184  | 861.4556  | -43.1 | 0 |       | <b>K.SLAELSSR.L</b>                   |
| <a href="#">32</a> | 296 - 304   | 1149.5057 | 1148.4984 | 1148.5462 | -41.6 | 0 |       | <b>R.LDQQVEDFR.R</b>                  |
| <a href="#">33</a> | 296 - 304   | 1149.5057 | 1148.4985 | 1148.5462 | -41.6 | 0 | 20    | <b>R.LDQQVEDFR.R</b>                  |
| <a href="#">51</a> | 296 - 305   | 1305.5947 | 1304.5874 | 1304.6473 | -45.9 | 1 |       | <b>R.LDQQVEDFR.T</b>                  |
| <a href="#">45</a> | 306 - 316   | 1212.5294 | 1211.5221 | 1211.5823 | -49.6 | 0 |       | <b>R.TVGPYGETFNK.A</b>                |
| <a href="#">38</a> | 317 - 326   | 1174.5699 | 1173.5626 | 1173.6176 | -46.8 | 0 |       | <b>K.AMVQQLDTLR.Q</b>                 |
| <a href="#">39</a> | 317 - 326   | 1174.5700 | 1173.5627 | 1173.6176 | -46.8 | 0 | 50    | <b>K.AMVQQLDTLR.Q</b>                 |
| <a href="#">43</a> | 317 - 326   | 1190.5620 | 1189.5547 | 1189.6125 | -48.6 | 0 |       | <b>K.AMVQQLDTLR.Q + Oxidation (M)</b> |
| <a href="#">66</a> | 329 - 345   | 1839.8657 | 1838.8584 | 1838.9414 | -45.1 | 0 |       | <b>K.LGPLAGDVEDHLSFLEK.D</b>          |

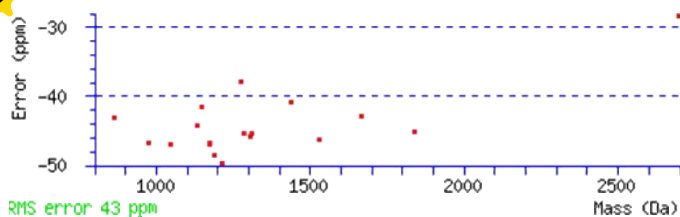

```
ID      V6F7X3_BOVIN          Unreviewed;      380 AA.
AC      V6F7X3;
DT      10-APR-2019, integrated into UniProtKB/TrEMBL.
DT      10-APR-2019, sequence version 1.
DT      26-FEB-2020, entry version 9.
DE      SubName: Full=Apolipoprotein A-IV {ECO:0000313|EMBL:DAA22387.1};
GN      Name=APOA4 {ECO:0000313|EMBL:DAA22387.1};
GN      ORFNames=BOS_14370 {ECO:0000313|EMBL:DAA22387.1};
OS      Bos taurus (Bovine).
OC      Eukaryota; Metazoa; Chordata; Craniata; Vertebrata; Euteleostomi; Mammalia;
OC      Eutheria; Laurasiatheria; Artiodactyla; Ruminantia; Pecora; Bovidae;
OC      Bovinae; Bos.
OX      NCBI_TaxID=9913 {ECO:0000313|EMBL:DAA22387.1, ECO:0000313|Proteomes:UP000321980};
RN      [1] {ECO:0000313|EMBL:DAA22387.1, ECO:0000313|Proteomes:UP000321980}
RP      NUCLEOTIDE SEQUENCE [LARGE SCALE GENOMIC DNA].
RX      PubMed=19393038; DOI=10.1186/gb-2009-10-4-r42;
RA      Zimin A.V., Delcher A.L., Florea L., Kelley D.R., Schatz M.C., Puiu D.,
RA      Hanrahan F., Pertea G., Van Tassell C.P., Sonstegard T.S., Marcais G.,
RA      Roberts M., Subramanian P., Yorke J.A., Salzberg S.L.;
RT      "A whole-genome assembly of the domestic cow, Bos taurus.";
RL      Genome Biol. 10:R42.01-R42.10(2009).
CC      -!- SUBCELLULAR LOCATION: Secreted {ECO:0000256|SAAS:SAAS00143437}.
CC      -!- SIMILARITY: Belongs to the apolipoprotein A1/A4/E family.
CC      {ECO:0000256|SAAS:SAAS00598075}.
CC      -----
CC      Copyrighted by the UniProt Consortium, see https://www.uniprot.org/terms
CC      Distributed under the Creative Commons Attribution (CC BY 4.0) License
CC      -----
DR      EMBL; GJ062397; DAA22387.1; -; Genomic_DNA.
DR      RefSeq; XP_005215912.1; XM_005215855.3.
DR      RefSeq; XP_010810673.1; XM_010812371.2.
DR      RefSeq; XP_015330105.1; XM_015474619.1.
DR      SMR; V6F7X3; -.
DR      GeneID; 537301; -.
DR      CTD; 337; -.
DR      OMA; TVVWDYF; -.
DR      OrthoDB; 1299087at2759; -.
DR      Proteomes; UP000321980; Chromosome 15.
DR      GO; GO:0005576; C:extracellular region; IEA:UniProtKB-SubCell.
DR      GO; GO:0008289; F:lipid binding; IEA:InterPro.
DR      GO; GO:0006869; P:lipid transport; IEA:UniProtKB-KW.
DR      GO; GO:0042157; P:lipoprotein metabolic process; IEA:InterPro.
DR      InterPro; IPR000074; ApoA_E.
DR      Pfam; PF01442; Apolipoprotein; 2.
PE      3: Inferred from homology;
KW      Chylomicron {ECO:0000256|SAAS:SAAS01245600};
KW      Coiled coil {ECO:0000256|SAM:Coils};
KW      Lipid transport {ECO:0000256|SAAS:SAAS00143435};
KW      Lipoprotein {ECO:0000313|EMBL:DAA22387.1};
KW      Secreted {ECO:0000256|SAAS:SAAS00143438}; Signal {ECO:0000256|SAM:SignalP};
KW      Transport {ECO:0000256|SAAS:SAAS00143435}.
FT      SIGNAL          1..20
FT                      /evidence="ECO:0000256|SAM:SignalP"
FT      CHAIN           21..380
FT                      /evidence="ECO:0000256|SAM:SignalP"
FT                      /id="PRO_5018663070"
FT      REGION          361..380
FT                      /note="Disordered"
FT                      /evidence="ECO:0000256|SAM:MobiDB-lite"
FT      COILED          88..112
FT                      /evidence="ECO:0000256|SAM:Coils"
FT      COILED          246..266
FT                      /evidence="ECO:0000256|SAM:Coils"
FT      COILED          282..302
FT                      /evidence="ECO:0000256|SAM:Coils"
SQ      SEQUENCE      380 AA; 42990 MW; 9D3F49D2A70BE77C CRC64;
MFLKAVVLSL ALVAVTGAEA EVNADQVATV IWDYFSQLGN NAKKAVEHIQ KSELTQQQLNT
LFQDKLGEVS TYTDDLQKKL VPFATELHER LTKDSEKLKE EIRKELEDLR ARLLPHATEV
SQKIGDNVRE LQQRLLGPYAE ELRTQVDTQA QQLRRQLTPY AERMEKVMRQ NLDQLQASLA
PYAEELQATV NQRVEELKGR LTPYADQLQT KIEENVLELR RSLAPYAQDV QGKLNHQLEG
LAFQMKKHAE ELKAKISAKA EELRQGLVPL VNSVHGSQLG NAEDLQKSLA ELSSRLDQQV
```

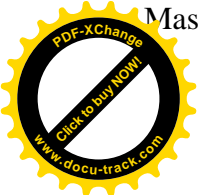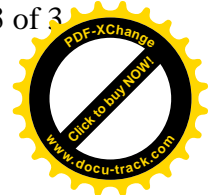

EDFRRTVGPY GETFNKAMVQ QLDTLRQKLK PLAGDVEDHL SFLEKDLRDK VSSFFNTLKE  
KESQAPALPA QEEMPVPLGG

//

Mascot: <http://www.matrixscience.com/>
