# Supplementary material for: Alpha-2-Macroglobulin as a New Promising Biomarker Improving the Diagnostic Sensitivity of Bovine Paratuberculosis
Source: Frontiers journal article supplement (doi:10.3389/fvets.2021.637716), 2021-03-05
Supplement: Data_Sheet_1.zip [file Data_Sheet_1.zip]

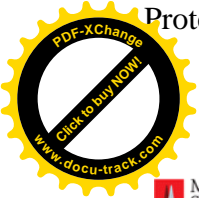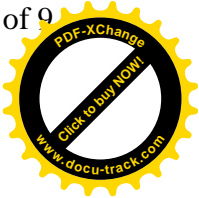

MATRIX SCIENCE Mascot Search Results

User :  
Email :  
Search title : BAEDW\2020\_3\_5\2020\_3\_5\MSMS 14\N22  
Database : Uniprot\_bovine bovine\_20200316 (134392 sequences; 76244912 residues)  
Timestamp : 31 Mar 2020 at 01:09:04 GMT  
Warning : A Peptide summary report will usually give a much clearer picture of MS/MS search results.  
Top Score : 66 for A0A1R3UGP4, Kallikrein G OS=Bos taurus OX=9913 GN=KLNG PE=3 SV=1

Mascot Score Histogram

Protein score is  $-10 \cdot \log(P)$ , where P is the probability that the observed match is a random event.  
Protein scores greater than 64 are significant ( $p < 0.05$ ).  
Protein scores are derived from ions scores as a non-probabilistic basis for ranking protein hits.

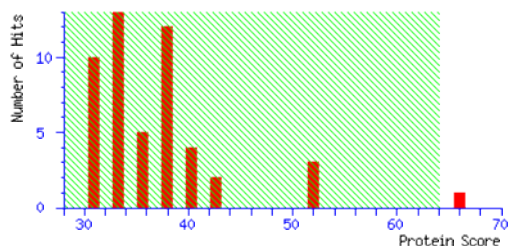

Protein Summary Report

Format As Protein Summary (deprecated) [Help](#)  
Significance threshold p< 0.05 Max. number of hits 30  
Preferred taxonomy All entries  
Re-Search All Search Unmatched

Index

| Accession                      | Mass  | Score | Description                                                                                    |
|--------------------------------|-------|-------|------------------------------------------------------------------------------------------------|
| 1. <a href="#">A0A1R3UGP4</a>  | 28249 | 66    | Kallikrein G OS=Bos taurus OX=9913 GN=KLNG PE=3 SV=1                                           |
| 2. <a href="#">F1N376</a>      | 69563 | 53    | Tyrosine-protein phosphatase non-receptor type OS=Bos taurus OX=9913 GN=LOC526769 PE=3 SV=3    |
| 3. <a href="#">A0A4W2FSQ5</a>  | 66334 | 52    | Uncharacterized protein OS=Bos indicus x Bos taurus OX=30522 GN=LOC113906723 PE=4 SV=1         |
| 4. <a href="#">A0A4W2CKS5</a>  | 66352 | 52    | Uncharacterized protein OS=Bos indicus x Bos taurus OX=30522 PE=4 SV=1                         |
| 5. <a href="#">A0A4W2F3Q5</a>  | 49802 | 43    | Dihydrolipoamide dehydrogenase OS=Bos indicus x Bos taurus OX=30522 GN=DLD PE=3 SV=1           |
| 6. <a href="#">A0A4W2F4W9</a>  | 52206 | 42    | Dihydrolipoamide dehydrogenase OS=Bos indicus x Bos taurus OX=30522 GN=DLD PE=3 SV=1           |
| 7. <a href="#">A0A4W2G1C7</a>  | 31863 | 41    | Kallikrein related peptidase 11 OS=Bos indicus x Bos taurus OX=30522 GN=KLK11 PE=3 SV=1        |
| 8. <a href="#">A0A4W2G501</a>  | 23018 | 40    | TMEM9 domain family member B OS=Bos indicus x Bos taurus OX=30522 GN=TMEM9B PE=4 SV=1          |
| 9. <a href="#">Q3ZCD6</a>      | 23018 | 40    | TMEM9 domain family member B OS=Bos taurus OX=9913 GN=TMEM9B PE=2 SV=1                         |
| 10. <a href="#">A0A4W2DBF5</a> | 25092 | 39    | Uncharacterized protein OS=Bos indicus x Bos taurus OX=30522 PE=4 SV=1                         |
| 11. <a href="#">F1N206</a>     | 54723 | 39    | Dihydrolipoamide dehydrogenase OS=Bos taurus OX=9913 GN=DLD PE=1 SV=2                          |
| 12. <a href="#">A0A4W2H686</a> | 54723 | 39    | Dihydrolipoamide dehydrogenase OS=Bos indicus x Bos taurus OX=30522 GN=DLD PE=3 SV=1           |
| 13. <a href="#">A0A4W2H5Z2</a> | 33370 | 38    | Ketohexokinase OS=Bos indicus x Bos taurus OX=30522 GN=KHK PE=4 SV=1                           |
| 14. <a href="#">A0A3Q1N4Y2</a> | 25122 | 38    | Uncharacterized protein OS=Bos taurus OX=9913 PE=4 SV=1                                        |
| 15. <a href="#">F6PSE2</a>     | 92262 | 38    | Nibrin OS=Bos taurus OX=9913 GN=NBIN PE=4 SV=2                                                 |
| 16. <a href="#">A0A4W2CAE8</a> | 92262 | 38    | Nibrin OS=Bos indicus x Bos taurus OX=30522 GN=NBIN PE=4 SV=1                                  |
| 17. <a href="#">A0A4W2BNU6</a> | 41726 | 38    | Dehydrogenase/reductase 12 OS=Bos indicus x Bos taurus OX=30522 GN=DHRS12 PE=4 SV=1            |
| 18. <a href="#">A0A4Q1M3R6</a> | 41726 | 38    | Dehydrogenase/reductase SDR family member 12 OS=Bos taurus OX=9913 GN=DHRS12 PE=4 SV=1         |
| 19. <a href="#">A0A4W2E9U7</a> | 76824 | 38    | Nibrin OS=Bos indicus x Bos taurus OX=30522 GN=NBIN PE=4 SV=1                                  |
| 20. <a href="#">A0A4W2E4S5</a> | 35275 | 38    | Kallikrein related peptidase 11 OS=Bos indicus x Bos taurus OX=30522 GN=KLK11 PE=3 SV=1        |
| 21. <a href="#">Q5EA35</a>     | 33326 | 37    | Ketohexokinase OS=Bos taurus OX=9913 GN=KHK PE=2 SV=1                                          |
| 22. <a href="#">Q0I175</a>     | 38414 | 37    | Ketohexokinase OS=Bos taurus OX=9913 GN=KHK PE=1 SV=1                                          |
| 23. <a href="#">A0A4W2EMU6</a> | 31365 | 36    | Ketohexokinase OS=Bos indicus x Bos taurus OX=30522 GN=KHK PE=4 SV=1                           |
| 24. <a href="#">A0A4W2G3Z2</a> | 37905 | 36    | Kallikrein related peptidase 11 OS=Bos indicus x Bos taurus OX=30522 GN=KLK11 PE=3 SV=1        |
| 25. <a href="#">F1N4M1</a>     | 37905 | 36    | Kallikrein related peptidase 11 OS=Bos taurus OX=9913 GN=KLK11 PE=3 SV=3                       |
| 26. <a href="#">A0A4W2H4X6</a> | 31395 | 35    | Ketohexokinase OS=Bos indicus x Bos taurus OX=30522 GN=KHK PE=4 SV=1                           |
| 27. <a href="#">A0A4W2C9V0</a> | 38733 | 35    | Uncharacterized protein OS=Bos indicus x Bos taurus OX=30522 GN=MFGE8 PE=4 SV=1                |
| 28. <a href="#">A0A4W2F3R1</a> | 41965 | 34    | Reverse transcriptase domain-containing protein OS=Bos indicus x Bos taurus OX=30522 PE=4 SV=1 |
| 29. <a href="#">A0A4W2IP26</a> | 92361 | 34    | Nibrin OS=Bos indicus x Bos taurus OX=30522 GN=NBIN PE=4 SV=1                                  |
| 30. <a href="#">A0A1C9HI59</a> | 67468 | 34    | LS037 OS=Lumpy skin disease virus OX=59509 GN=LW037 PE=4 SV=1                                  |

Results List

|                                                      |                            |             |           |               |                                                       |
|------------------------------------------------------|----------------------------|-------------|-----------|---------------|-------------------------------------------------------|
| 1.                                                   | <a href="#">A0A1R3UGP4</a> | Mass: 28249 | Score: 66 | Expect: 0.034 | Matches: 10                                           |
| Kallikrein G OS=Bos taurus OX=9913 GN=KLNG PE=3 SV=1 |                            |             |           |               |                                                       |
|                                                      | Observed                   | Mr(expt)    | Mr(calcd) | ppm           | Start End Miss Ions Peptide                           |
|                                                      | 848.4780                   | 847.4707    | 847.4473  | 27.6          | 109 - 115 0 --- R.NDIMLVK.M + Oxidation (M)           |
|                                                      | 951.5720                   | 950.5647    | 950.4862  | 82.7          | 239 - 245 0 --- K.YVDWIQK.T                           |
|                                                      | 1179.5499                  | 1178.5426   | 1178.6482 | -89.54        | 229 - 238 1 --- K.KPGVYTKVCK.Y                        |
|                                                      | 1184.6520                  | 1183.6447   | 1183.6747 | -25.32        | 45 - 55 0 --- R.LLCGATLIAPR.W                         |
|                                                      | 1211.6572                  | 1210.6499   | 1210.6604 | -8.69         | 163 - 172 1 --- R.CANVTIIKHR.E                        |
|                                                      | 2015.1949                  | 2014.1876   | 2013.9908 | 97.7          | 88 - 105 1 --- R.TATKSFPPHDFNNSLPNK.D                 |
|                                                      | 2283.0847                  | 2282.0774   | 2282.0975 | -8.78         | 68 - 87 1 --- R.YVVLHGAHSLGRQDGCQTR.T                 |
|                                                      | 2305.0740                  | 2304.0667   | 2304.1793 | -48.84        | 1 - 21 0 --- .MMTLQLIMFALVTGHVGGETR.I                 |
|                                                      | 2321.0552                  | 2320.0479   | 2320.1742 | -54.42        | 1 - 21 0 --- .MMTLQLIMFALVTGHVGGETR.I + Oxidation (M) |
|                                                      | 2528.2617                  | 2527.2544   | 2527.4019 | -58.33        | 2 - 24 1 --- M.MTLQLIMFALVTGHVGGETR.IIK.G             |

No match to: 813.4393, 834.4629, 838.4906, 842.4641, 846.4475, 850.0118, 850.4896, 850.4896, 853.4691, 856.4822, 864.4857, 865.9818, 866.4929, 868.5015, 868.5015, 870.4977, 876.9884, 882.5173, 882.5173, 892.9574, 892.9574, 896.3969, 908.9280, 996.5430, 1017.6157, 1017.6157, 1019.6299, 1033.6429, 1045.5127, 1045.5127, 1051.6522, 1051.6522, 1065.6028, 1131.6493, 1131.6493, 1133.6587, 1147.6777, 1151.6696, 1165.6809, 1165.6809, 1169.5313, 1171.6676, 1185.6776, 1185.6776, 1189.6735, 1193.6417, 1203.6858, 1207.6569, 1225.6708, 1279.7007, 1300.7860, 1316.8134, 1334.8168, 1334.8168, 1440.5756, 1448.8479, 1448.8479, 1475.6846, 1522.7052, 1533.7407, 1538.7010, 1554.6993, 1581.7728, 1617.9867, 1617.9867, 1732.0165, 1901.1586, 2211.0193

2. [FLN376](#) Mass: 69563 Score: 53 Expect: 0.74 Matches: 12

Tyrosine-protein phosphatase non-receptor type OS=Bos taurus OX=9913 GN=LOC526769 PE=3 SV=3

| Observed                                                                                                                                                                                                                                                                                                                                                                                                                                                                                                                                                                                                                                                                                                                         | Mr(expt)  | Mr(calc)  | ppm    | Start | End | Miss | Ions | Peptide                                   |
|----------------------------------------------------------------------------------------------------------------------------------------------------------------------------------------------------------------------------------------------------------------------------------------------------------------------------------------------------------------------------------------------------------------------------------------------------------------------------------------------------------------------------------------------------------------------------------------------------------------------------------------------------------------------------------------------------------------------------------|-----------|-----------|--------|-------|-----|------|------|-------------------------------------------|
| 813.4393                                                                                                                                                                                                                                                                                                                                                                                                                                                                                                                                                                                                                                                                                                                         | 812.4320  | 812.4868  | -67.44 | 214   | 220 | 1    | ---  | R.QPLKATR.I                               |
| 838.4906                                                                                                                                                                                                                                                                                                                                                                                                                                                                                                                                                                                                                                                                                                                         | 837.4833  | 837.4821  | 1.48   | 538   | 546 | 0    | ---  | R.KPVGAGPGR.G                             |
| 846.4475                                                                                                                                                                                                                                                                                                                                                                                                                                                                                                                                                                                                                                                                                                                         | 845.4402  | 845.3991  | 48.6   | 565   | 570 | 1    | ---  | R.ERQEER.G                                |
| 866.4929                                                                                                                                                                                                                                                                                                                                                                                                                                                                                                                                                                                                                                                                                                                         | 865.4856  | 865.5134  | -32.09 | 206   | 213 | 0    | ---  | R.SGVVHRLR.Q                              |
| 1133.6587                                                                                                                                                                                                                                                                                                                                                                                                                                                                                                                                                                                                                                                                                                                        | 1132.6514 | 1132.6101 | 36.5   | 47    | 55  | 1    | ---  | R.RHNEVTHIK.I                             |
| 1179.5499                                                                                                                                                                                                                                                                                                                                                                                                                                                                                                                                                                                                                                                                                                                        | 1178.5426 | 1178.5536 | -9.34  | 547   | 558 | 0    | ---  | R.GGACAGVTMVTR.G                          |
| 1522.7052                                                                                                                                                                                                                                                                                                                                                                                                                                                                                                                                                                                                                                                                                                                        | 1521.6979 | 1521.7762 | -51.46 | 166   | 178 | 0    | ---  | R.VTHIMIHFPDQK.Y                          |
| 1538.7010                                                                                                                                                                                                                                                                                                                                                                                                                                                                                                                                                                                                                                                                                                                        | 1537.6937 | 1537.7711 | -50.35 | 166   | 178 | 0    | ---  | R.VTHIMIHFPDQK.Y + Oxidation (M)          |
| 2015.1949                                                                                                                                                                                                                                                                                                                                                                                                                                                                                                                                                                                                                                                                                                                        | 2014.1876 | 2014.0201 | 83.2   | 538   | 558 | 1    | ---  | R.KPVGAGPGRGGACAGVTMVTR.G + Oxidation (M) |
| 2211.0193                                                                                                                                                                                                                                                                                                                                                                                                                                                                                                                                                                                                                                                                                                                        | 2210.0120 | 2210.1596 | -66.79 | 71    | 90  | 0    | ---  | K.FATLAEVLVQHYTGQHGGLLR.E                 |
| 2321.0552                                                                                                                                                                                                                                                                                                                                                                                                                                                                                                                                                                                                                                                                                                                        | 2320.0479 | 2320.1394 | -39.41 | 221   | 242 | 1    | ---  | R.ISAASIESRVQELSEATDASEK.A                |
| 2528.2617                                                                                                                                                                                                                                                                                                                                                                                                                                                                                                                                                                                                                                                                                                                        | 2527.2544 | 2527.2819 | -10.88 | 290   | 311 | 1    | ---  | R.VILHDVDDRVPGADYINANYIR.Q                |
| No match to: 834.4629, 842.4641, 848.4780, 850.0118, 850.4896, 850.4896, 853.4691, 856.4822, 864.4857, 865.9818, 868.5015, 868.5015, 870.4977, 876.9884, 882.5173, 882.5173, 892.9574, 892.9574, 896.3969, 908.9280, 951.5720, 996.5430, 1017.6157, 1017.6157, 1019.6299, 1033.6429, 1045.5127, 1045.5127, 1051.6522, 1051.6522, 1065.6028, 1131.6493, 1147.6777, 1151.6696, 1165.6809, 1165.6809, 1169.5313, 1171.6676, 1184.6520, 1185.6776, 1185.6776, 1189.6735, 1193.6417, 1203.6858, 1207.6569, 1211.6572, 1225.6708, 1279.7007, 1300.7860, 1316.8134, 1334.8168, 1334.8168, 1440.5756, 1448.8479, 1448.8479, 1475.6846, 1533.7407, 1554.6993, 1581.7728, 1617.9867, 1617.9867, 1732.0165, 1901.1586, 2283.0847, 2305.0740 |           |           |        |       |     |      |      |                                           |

3. [A0A4W2FSQ5](#) Mass: 66334 Score: 52 Expect: 0.76 Matches: 12

Uncharacterized protein OS=Bos indicus x Bos taurus OX=30522 GN=LOC113906723 PE=4 SV=1

| Observed                                                                                                                                                                                                                                                                                                                                                                                                                                                                                                                                                                                                                                                                                                                         | Mr(expt)  | Mr(calc)  | ppm    | Start | End | Miss | Ions | Peptide                                   |
|----------------------------------------------------------------------------------------------------------------------------------------------------------------------------------------------------------------------------------------------------------------------------------------------------------------------------------------------------------------------------------------------------------------------------------------------------------------------------------------------------------------------------------------------------------------------------------------------------------------------------------------------------------------------------------------------------------------------------------|-----------|-----------|--------|-------|-----|------|------|-------------------------------------------|
| 813.4393                                                                                                                                                                                                                                                                                                                                                                                                                                                                                                                                                                                                                                                                                                                         | 812.4320  | 812.4868  | -67.44 | 194   | 200 | 1    | ---  | R.QPLKATR.I                               |
| 838.4906                                                                                                                                                                                                                                                                                                                                                                                                                                                                                                                                                                                                                                                                                                                         | 837.4833  | 837.4821  | 1.48   | 510   | 518 | 0    | ---  | R.KPVGAGPGR.G                             |
| 846.4475                                                                                                                                                                                                                                                                                                                                                                                                                                                                                                                                                                                                                                                                                                                         | 845.4402  | 845.3991  | 48.6   | 537   | 542 | 1    | ---  | R.ERQEER.G                                |
| 866.4929                                                                                                                                                                                                                                                                                                                                                                                                                                                                                                                                                                                                                                                                                                                         | 865.4856  | 865.5134  | -32.09 | 186   | 193 | 0    | ---  | R.SGVVHRLR.Q                              |
| 1133.6587                                                                                                                                                                                                                                                                                                                                                                                                                                                                                                                                                                                                                                                                                                                        | 1132.6514 | 1132.6101 | 36.5   | 27    | 35  | 1    | ---  | R.RHNEVTHIK.I                             |
| 1179.5499                                                                                                                                                                                                                                                                                                                                                                                                                                                                                                                                                                                                                                                                                                                        | 1178.5426 | 1178.5536 | -9.34  | 519   | 530 | 0    | ---  | R.GGACAGVTMVTR.G                          |
| 1522.7052                                                                                                                                                                                                                                                                                                                                                                                                                                                                                                                                                                                                                                                                                                                        | 1521.6979 | 1521.7762 | -51.46 | 146   | 158 | 0    | ---  | R.VTHIMIHFPDQK.Y                          |
| 1538.7010                                                                                                                                                                                                                                                                                                                                                                                                                                                                                                                                                                                                                                                                                                                        | 1537.6937 | 1537.7711 | -50.35 | 146   | 158 | 0    | ---  | R.VTHIMIHFPDQK.Y + Oxidation (M)          |
| 2015.1949                                                                                                                                                                                                                                                                                                                                                                                                                                                                                                                                                                                                                                                                                                                        | 2014.1876 | 2014.0201 | 83.2   | 510   | 530 | 1    | ---  | R.KPVGAGPGRGGACAGVTMVTR.G + Oxidation (M) |
| 2211.0193                                                                                                                                                                                                                                                                                                                                                                                                                                                                                                                                                                                                                                                                                                                        | 2210.0120 | 2210.1596 | -66.79 | 51    | 70  | 0    | ---  | K.FATLAEVLVQHYTGQHGGLLR.E                 |
| 2321.0552                                                                                                                                                                                                                                                                                                                                                                                                                                                                                                                                                                                                                                                                                                                        | 2320.0479 | 2320.1394 | -39.41 | 201   | 222 | 1    | ---  | R.ISAASIESRVQELSEATDASEK.A                |
| 2528.2617                                                                                                                                                                                                                                                                                                                                                                                                                                                                                                                                                                                                                                                                                                                        | 2527.2544 | 2527.2819 | -10.88 | 270   | 291 | 1    | ---  | R.VILHDVDDRVPGADYINANYIR.S                |
| No match to: 834.4629, 842.4641, 848.4780, 850.0118, 850.4896, 850.4896, 853.4691, 856.4822, 864.4857, 865.9818, 868.5015, 868.5015, 870.4977, 876.9884, 882.5173, 882.5173, 892.9574, 892.9574, 896.3969, 908.9280, 951.5720, 996.5430, 1017.6157, 1017.6157, 1019.6299, 1033.6429, 1045.5127, 1045.5127, 1051.6522, 1051.6522, 1065.6028, 1131.6493, 1147.6777, 1151.6696, 1165.6809, 1165.6809, 1169.5313, 1171.6676, 1184.6520, 1185.6776, 1185.6776, 1189.6735, 1193.6417, 1203.6858, 1207.6569, 1211.6572, 1225.6708, 1279.7007, 1300.7860, 1316.8134, 1334.8168, 1334.8168, 1440.5756, 1448.8479, 1448.8479, 1475.6846, 1533.7407, 1554.6993, 1581.7728, 1617.9867, 1617.9867, 1732.0165, 1901.1586, 2283.0847, 2305.0740 |           |           |        |       |     |      |      |                                           |

4. [A0A4W2CKS5](#) Mass: 66352 Score: 52 Expect: 0.89 Matches: 12

Uncharacterized protein OS=Bos indicus x Bos taurus OX=30522 PE=4 SV=1

| Observed                                                                                                                                                                                                                                                                                                                                                                                                                                                                                                                                                                                                                                                                                                                         | Mr(expt)  | Mr(calc)  | ppm    | Start | End | Miss | Ions | Peptide                                   |
|----------------------------------------------------------------------------------------------------------------------------------------------------------------------------------------------------------------------------------------------------------------------------------------------------------------------------------------------------------------------------------------------------------------------------------------------------------------------------------------------------------------------------------------------------------------------------------------------------------------------------------------------------------------------------------------------------------------------------------|-----------|-----------|--------|-------|-----|------|------|-------------------------------------------|
| 813.4393                                                                                                                                                                                                                                                                                                                                                                                                                                                                                                                                                                                                                                                                                                                         | 812.4320  | 812.4868  | -67.44 | 194   | 200 | 1    | ---  | R.QPLKATR.I                               |
| 838.4906                                                                                                                                                                                                                                                                                                                                                                                                                                                                                                                                                                                                                                                                                                                         | 837.4833  | 837.4821  | 1.48   | 510   | 518 | 0    | ---  | R.KPVGAGPGR.G                             |
| 846.4475                                                                                                                                                                                                                                                                                                                                                                                                                                                                                                                                                                                                                                                                                                                         | 845.4402  | 845.3991  | 48.6   | 537   | 542 | 1    | ---  | R.ERQEER.G                                |
| 866.4929                                                                                                                                                                                                                                                                                                                                                                                                                                                                                                                                                                                                                                                                                                                         | 865.4856  | 865.5134  | -32.09 | 186   | 193 | 0    | ---  | R.SGVVHRLR.Q                              |
| 1133.6587                                                                                                                                                                                                                                                                                                                                                                                                                                                                                                                                                                                                                                                                                                                        | 1132.6514 | 1132.6101 | 36.5   | 27    | 35  | 1    | ---  | R.RHNEVTHIK.I                             |
| 1179.5499                                                                                                                                                                                                                                                                                                                                                                                                                                                                                                                                                                                                                                                                                                                        | 1178.5426 | 1178.5536 | -9.34  | 519   | 530 | 0    | ---  | R.GGACAGVTMVTR.G                          |
| 1522.7052                                                                                                                                                                                                                                                                                                                                                                                                                                                                                                                                                                                                                                                                                                                        | 1521.6979 | 1521.7762 | -51.46 | 146   | 158 | 0    | ---  | R.VTHIMIHFPDQK.Y                          |
| 1538.7010                                                                                                                                                                                                                                                                                                                                                                                                                                                                                                                                                                                                                                                                                                                        | 1537.6937 | 1537.7711 | -50.35 | 146   | 158 | 0    | ---  | R.VTHIMIHFPDQK.Y + Oxidation (M)          |
| 2015.1949                                                                                                                                                                                                                                                                                                                                                                                                                                                                                                                                                                                                                                                                                                                        | 2014.1876 | 2014.0201 | 83.2   | 510   | 530 | 1    | ---  | R.KPVGAGPGRGGACAGVTMVTR.G + Oxidation (M) |
| 2211.0193                                                                                                                                                                                                                                                                                                                                                                                                                                                                                                                                                                                                                                                                                                                        | 2210.0120 | 2210.1596 | -66.79 | 51    | 70  | 0    | ---  | K.FATLAEVLVQHYTGQHGGLLR.E                 |
| 2321.0552                                                                                                                                                                                                                                                                                                                                                                                                                                                                                                                                                                                                                                                                                                                        | 2320.0479 | 2320.1394 | -39.41 | 201   | 222 | 1    | ---  | R.ISAASIESRVQELSEATDASEK.A                |
| 2528.2617                                                                                                                                                                                                                                                                                                                                                                                                                                                                                                                                                                                                                                                                                                                        | 2527.2544 | 2527.2819 | -10.88 | 270   | 291 | 1    | ---  | R.VILHDVDDRVPGADYINANYIR.S                |
| No match to: 834.4629, 842.4641, 848.4780, 850.0118, 850.4896, 850.4896, 853.4691, 856.4822, 864.4857, 865.9818, 868.5015, 868.5015, 870.4977, 876.9884, 882.5173, 882.5173, 892.9574, 892.9574, 896.3969, 908.9280, 951.5720, 996.5430, 1017.6157, 1017.6157, 1019.6299, 1033.6429, 1045.5127, 1045.5127, 1051.6522, 1051.6522, 1065.6028, 1131.6493, 1147.6777, 1151.6696, 1165.6809, 1165.6809, 1169.5313, 1171.6676, 1184.6520, 1185.6776, 1185.6776, 1189.6735, 1193.6417, 1203.6858, 1207.6569, 1211.6572, 1225.6708, 1279.7007, 1300.7860, 1316.8134, 1334.8168, 1334.8168, 1440.5756, 1448.8479, 1448.8479, 1475.6846, 1533.7407, 1554.6993, 1581.7728, 1617.9867, 1617.9867, 1732.0165, 1901.1586, 2283.0847, 2305.0740 |           |           |        |       |     |      |      |                                           |

5. [A0A4W2F3Q5](#) Mass: 49802 Score: 43 Expect: 6.3 Matches: 12

Dihydrolipoamide dehydrogenase OS=Bos indicus x Bos taurus OX=30522 GN=DLD PE=3 SV=1

| Observed  | Mr(expt)  | Mr(calc)  | ppm   | Start | End | Miss | Ions | Peptide                       |
|-----------|-----------|-----------|-------|-------|-----|------|------|-------------------------------|
| 868.5015  | 867.4942  | 867.4524  | 48.2  | 7     | 13  | 0    | ---  | R.VYCSLVK.R                   |
| 868.5015  | 867.4943  | 867.4524  | 48.2  | 7     | 13  | 0    | ---  | R.VYCSLVK.R                   |
| 1017.6157 | 1016.6084 | 1016.5614 | 46.2  | 393   | 401 | 1    | ---  | K.ILGQKSTDR.V                 |
| 1017.6157 | 1016.6084 | 1016.5614 | 46.2  | 393   | 401 | 1    | ---  | K.ILGQKSTDR.V                 |
| 1151.6696 | 1150.6623 | 1150.5870 | 65.5  | 363   | 372 | 1    | ---  | K.EEGIEYKVGK.F                |
| 1165.6809 | 1164.6736 | 1164.5631 | 94.9  | 123   | 132 | 1    | ---  | K.MMEQKSNVAVK.A               |
| 1165.6809 | 1164.6736 | 1164.5631 | 94.9  | 123   | 132 | 1    | ---  | K.MMEQKSNVAVK.A               |
| 1193.6417 | 1192.6344 | 1192.6353 | -0.72 | 370   | 380 | 1    | ---  | K.VGKFPFAANSR.A               |
| 1203.6858 | 1202.6785 | 1202.6772 | 1.14  | 289   | 298 | 1    | ---  | R.IPVNTRFQTK.I                |
| 1279.7007 | 1278.6934 | 1278.6311 | 48.7  | 118   | 127 | 1    | ---  | R.LNLEKMMQK.S + Oxidation (M) |

1533.7407 1532.7334 1532.7682 -22.69 237 - 252 1 --- K.SDGKIDVSIEAASGGK.A  
 1581.7728 1580.7655 1580.7569 5.44 357 - 369 1 --- K.SEEQLKEEGIEYK.V  
**No match to:** 813.4393, 834.4629, 838.4906, 842.4641, 846.4475, 848.4780, 850.0118, 850.4896, 850.4896, 853.4691, 856.4822, 864.4857, 865.9818, 866.4929, 870.4977, 876.9884, 882.5173, 882.5173, 892.9574, 892.9574, 896.3969, 908.9280, 951.5720, 996.5430, 1019.6299, 1033.6429, 1045.5127, 1045.5127, 1051.6522, 1051.6522, 1065.6028, 1131.6493, 1133.6587, 1147.6777, 1169.5313, 1171.6676, 1179.5499, 1184.6520, 1185.6776, 1185.6776, 1189.6735, 1207.6569, 1211.6572, 1225.6708, 1300.7860, 1316.8134, 1334.8168, 1334.8168, 1440.5756, 1448.8479, 1448.8479, 1475.6846, 1522.7052, 1538.7010, 1554.6993, 1617.9867, 1617.9867, 1732.0165, 1901.1586, 2015.1949, 2211.0193, 2283.0847, 2305.0740, 2321.0552, 2528.2617

6. [A0A4W2F4W9](#) Mass: 52206 Score: 42 Expect: 9.3 Matches: 12

Dihydrolipoyl dehydrogenase OS=Bos indicus x Bos taurus OX=30522 GN=DLD PE=3 SV=1

| Observed  | Mr(expt)  | Mr(calc)  | ppm    | Start | End | Miss | Ions | Peptide                       |
|-----------|-----------|-----------|--------|-------|-----|------|------|-------------------------------|
| 868.5015  | 867.4942  | 867.4524  | 48.2   | 7     | 13  | 0    | ---  | R.VYCGLVK.R                   |
| 868.5015  | 867.4943  | 867.4524  | 48.2   | 7     | 13  | 0    | ---  | R.VYCGLVK.R                   |
| 1017.6157 | 1016.6084 | 1016.5614 | 46.2   | 418   | 426 | 1    | ---  | K.ILGQKSTDR.V                 |
| 1017.6157 | 1016.6084 | 1016.5614 | 46.2   | 418   | 426 | 1    | ---  | K.ILGQKSTDR.V                 |
| 1151.6696 | 1150.6623 | 1150.5870 | 65.5   | 388   | 397 | 1    | ---  | K.EEGIEYKVGK.F                |
| 1165.6809 | 1164.6736 | 1164.5631 | 94.9   | 100   | 109 | 1    | ---  | K.MMEQKSNVAVK.A               |
| 1165.6809 | 1164.6736 | 1164.5631 | 94.9   | 100   | 109 | 1    | ---  | K.MMEQKSNVAVK.A               |
| 1193.6417 | 1192.6344 | 1192.6353 | -0.72  | 395   | 405 | 1    | ---  | K.VGKFPFAANSR.A               |
| 1203.6858 | 1202.6785 | 1202.6772 | 1.14   | 314   | 323 | 1    | ---  | R.IPVNTRFQTK.I                |
| 1279.7007 | 1278.6934 | 1278.6311 | 48.7   | 95    | 104 | 1    | ---  | R.LNLEKMMQK.S + Oxidation (M) |
| 1533.7407 | 1532.7334 | 1532.7682 | -22.69 | 262   | 277 | 1    | ---  | K.SDGKIDVSIEAASGGK.A          |
| 1581.7728 | 1580.7655 | 1580.7569 | 5.44   | 382   | 394 | 1    | ---  | K.SEEQLKEEGIEYK.V             |

**No match to:** 813.4393, 834.4629, 838.4906, 842.4641, 846.4475, 848.4780, 850.0118, 850.4896, 850.4896, 853.4691, 856.4822, 864.4857, 865.9818, 866.4929, 870.4977, 876.9884, 882.5173, 882.5173, 892.9574, 892.9574, 896.3969, 908.9280, 951.5720, 996.5430, 1019.6299, 1033.6429, 1045.5127, 1045.5127, 1051.6522, 1051.6522, 1065.6028, 1131.6493, 1133.6587, 1147.6777, 1169.5313, 1171.6676, 1179.5499, 1184.6520, 1185.6776, 1185.6776, 1189.6735, 1207.6569, 1211.6572, 1225.6708, 1300.7860, 1316.8134, 1334.8168, 1334.8168, 1440.5756, 1448.8479, 1448.8479, 1475.6846, 1522.7052, 1538.7010, 1554.6993, 1617.9867, 1617.9867, 1732.0165, 1901.1586, 2015.1949, 2211.0193, 2283.0847, 2305.0740, 2321.0552, 2528.2617

7. [A0A4W2G1C7](#) Mass: 31863 Score: 41 Expect: 11 Matches: 7

Kallikrein related peptidase 11 OS=Bos indicus x Bos taurus OX=30522 GN=KLK11 PE=3 SV=1

| Observed  | Mr(expt)  | Mr(calc)  | ppm    | Start | End | Miss | Ions | Peptide                    |
|-----------|-----------|-----------|--------|-------|-----|------|------|----------------------------|
| 848.4780  | 847.4707  | 847.4473  | 27.6   | 140   | 146 | 0    | ---  | R.NDMLVK.M + Oxidation (M) |
| 951.5720  | 950.5647  | 950.4862  | 82.7   | 270   | 276 | 0    | ---  | K.YVDWIQK.T                |
| 1179.5499 | 1178.5426 | 1178.6482 | -89.54 | 260   | 269 | 1    | ---  | K.KPGVYTKVCK.Y             |
| 1184.6520 | 1183.6447 | 1183.6747 | -25.32 | 76    | 86  | 0    | ---  | R.LLCGATLIAPR.W            |
| 1211.6572 | 1210.6499 | 1210.6604 | -8.69  | 194   | 203 | 1    | ---  | R.CANVTIIKHR.E             |
| 2015.1949 | 2014.1876 | 2013.9908 | 97.7   | 119   | 136 | 1    | ---  | R.TATKSPFHPDFNNSLPNK.D     |
| 2283.0847 | 2282.0774 | 2282.0975 | -8.78  | 99    | 118 | 1    | ---  | R.YVVLHGAHSLGRQDGEQTR.T    |

**No match to:** 813.4393, 834.4629, 838.4906, 842.4641, 846.4475, 850.0118, 850.4896, 850.4896, 853.4691, 856.4822, 864.4857, 865.9818, 866.4929, 868.5015, 868.5015, 870.4977, 876.9884, 882.5173, 882.5173, 892.9574, 892.9574, 896.3969, 908.9280, 996.5430, 1017.6157, 1017.6157, 1019.6299, 1033.6429, 1045.5127, 1045.5127, 1051.6522, 1051.6522, 1065.6028, 1131.6493, 1133.6587, 1147.6777, 1151.6696, 1165.6809, 1165.6809, 1169.5313, 1171.6676, 1185.6776, 1185.6776, 1189.6735, 1193.6417, 1203.6858, 1207.6569, 1225.6708, 1279.7007, 1300.7860, 1316.8134, 1334.8168, 1334.8168, 1440.5756, 1448.8479, 1448.8479, 1475.6846, 1522.7052, 1533.7407, 1538.7010, 1554.6993, 1581.7728, 1617.9867, 1617.9867, 1732.0165, 1901.1586, 2211.0193, 2305.0740, 2321.0552, 2528.2617

8. [A0A4W2G501](#) Mass: 23018 Score: 40 Expect: 15 Matches: 7

TMEM9 domain family member B OS=Bos indicus x Bos taurus OX=30522 GN=TMEM9B PE=4 SV=1

| Observed  | Mr(expt)  | Mr(calc)  | ppm  | Start | End | Miss | Ions | Peptide                        |
|-----------|-----------|-----------|------|-------|-----|------|------|--------------------------------|
| 1131.6493 | 1130.6420 | 1130.6270 | 13.3 | 1     | 10  | 0    | ---  | -.MATLWAGLLR.L                 |
| 1147.6777 | 1146.6704 | 1146.6219 | 42.3 | 1     | 10  | 0    | ---  | -.MATLWAGLLR.L + Oxidation (M) |
| 1179.5499 | 1178.5426 | 1178.5390 | 3.07 | 79    | 88  | 0    | ---  | R.GPDVEAYCLR.C                 |
| 1207.6569 | 1206.6496 | 1206.6145 | 29.1 | 172   | 180 | 1    | ---  | K.VEYQQQRWK.L                  |
| 1211.6572 | 1210.6499 | 1210.6193 | 25.3 | 93    | 102 | 1    | ---  | K.YEERSSTVIK.V                 |
| 1225.6708 | 1224.6635 | 1224.5453 | 96.5 | 42    | 50  | 1    | ---  | R.CKCICPPYK.D                  |
| 2283.0847 | 2282.0774 | 2282.0606 | 7.37 | 60    | 78  | 1    | ---  | K.NISQKDCDCLHVVDPMPVR.G        |

**No match to:** 813.4393, 834.4629, 838.4906, 842.4641, 846.4475, 848.4780, 850.0118, 850.4896, 850.4896, 853.4691, 856.4822, 864.4857, 865.9818, 866.4929, 868.5015, 868.5015, 870.4977, 876.9884, 882.5173, 882.5173, 892.9574, 892.9574, 896.3969, 908.9280, 951.5720, 996.5430, 1017.6157, 1017.6157, 1019.6299, 1033.6429, 1045.5127, 1045.5127, 1051.6522, 1051.6522, 1065.6028, 1133.6587, 1151.6696, 1165.6809, 1165.6809, 1169.5313, 1171.6676, 1184.6520, 1185.6776, 1185.6776, 1189.6735, 1193.6417, 1203.6858, 1279.7007, 1300.7860, 1316.8134, 1334.8168, 1334.8168, 1440.5756, 1448.8479, 1448.8479, 1475.6846, 1522.7052, 1533.7407, 1538.7010, 1554.6993, 1581.7728, 1617.9867, 1617.9867, 1732.0165, 1901.1586, 2015.1949, 2211.0193, 2305.0740, 2321.0552, 2528.2617

9. [Q3ZCD6](#) Mass: 23018 Score: 40 Expect: 15 Matches: 7

TMEM9 domain family member B OS=Bos taurus OX=9913 GN=TMEM9B PE=2 SV=1

| Observed  | Mr(expt)  | Mr(calc)  | ppm  | Start | End | Miss | Ions | Peptide                        |
|-----------|-----------|-----------|------|-------|-----|------|------|--------------------------------|
| 1131.6493 | 1130.6420 | 1130.6270 | 13.3 | 1     | 10  | 0    | ---  | -.MATLWAGLLR.L                 |
| 1147.6777 | 1146.6704 | 1146.6219 | 42.3 | 1     | 10  | 0    | ---  | -.MATLWAGLLR.L + Oxidation (M) |
| 1179.5499 | 1178.5426 | 1178.5390 | 3.07 | 79    | 88  | 0    | ---  | R.GPDVEAYCLR.C                 |
| 1207.6569 | 1206.6496 | 1206.6145 | 29.1 | 172   | 180 | 1    | ---  | K.VEYQQQRWK.L                  |
| 1211.6572 | 1210.6499 | 1210.6193 | 25.3 | 93    | 102 | 1    | ---  | K.YEERSSTVIK.V                 |
| 1225.6708 | 1224.6635 | 1224.5453 | 96.5 | 42    | 50  | 1    | ---  | R.CKCICPPYK.D                  |
| 2283.0847 | 2282.0774 | 2282.0606 | 7.37 | 60    | 78  | 1    | ---  | K.NISQKDCDCLHVVDPMPVR.G        |

**No match to:** 813.4393, 834.4629, 838.4906, 842.4641, 846.4475, 848.4780, 850.0118, 850.4896, 850.4896, 853.4691, 856.4822, 864.4857, 865.9818, 866.4929, 868.5015, 868.5015, 870.4977, 876.9884, 882.5173, 882.5173, 892.9574, 892.9574, 896.3969, 908.9280, 951.5720, 996.5430, 1017.6157, 1017.6157, 1019.6299, 1033.6429, 1045.5127, 1045.5127, 1051.6522, 1051.6522, 1065.6028, 1133.6587, 1151.6696, 1165.6809, 1165.6809, 1169.5313, 1171.6676, 1184.6520, 1185.6776, 1185.6776, 1189.6735, 1193.6417, 1203.6858, 1279.7007, 1300.7860, 1316.8134, 1334.8168, 1334.8168, 1440.5756, 1448.8479, 1448.8479, 1475.6846, 1522.7052, 1533.7407, 1538.7010, 1554.6993, 1581.7728, 1617.9867, 1617.9867, 1732.0165, 1901.1586, 2015.1949, 2211.0193, 2305.0740, 2321.0552, 2528.2617

10. [A0A4W2DBF5](#) Mass: 25092 Score: 39 Expect: 16 Matches: 13

Uncharacterized protein OS=Bos indicus x Bos taurus OX=30522 PE=4 SV=1

| Observed | Mr(expt) | Mr(calc) | ppm    | Start | End | Miss | Ions | Peptide     |
|----------|----------|----------|--------|-------|-----|------|------|-------------|
| 838.4906 | 837.4833 | 837.5072 | -28.53 | 49    | 55  | 0    | ---  | K.DPKPIIR.D |

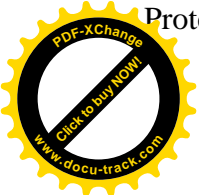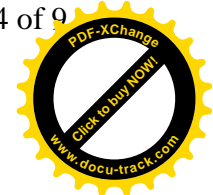

|           |           |           |        |     |   |     |   |     |                                            |
|-----------|-----------|-----------|--------|-----|---|-----|---|-----|--------------------------------------------|
| 866.4929  | 865.4856  | 865.4215  | 74.1   | 175 | - | 181 | 1 | --- | R.ETTMEKEK.S                               |
| 882.5173  | 881.5100  | 881.4454  | 73.3   | 5   | - | 13  | 1 | --- | R.STSSTKSGK.F                              |
| 882.5173  | 881.5100  | 881.4454  | 73.3   | 5   | - | 13  | 1 | --- | R.STSSTKSGK.F                              |
| 1165.6809 | 1164.6736 | 1164.6026 | 61.0   | 98  | - | 106 | 1 | --- | R.KLEVEYEQK.R                              |
| 1165.6809 | 1164.6736 | 1164.6026 | 61.0   | 98  | - | 106 | 1 | --- | R.KLEVEYEQK.R                              |
| 1193.6417 | 1192.6344 | 1192.6088 | 21.5   | 99  | - | 107 | 1 | --- | K.LEVEYEQKR.A                              |
| 1207.6569 | 1206.6496 | 1206.5815 | 56.4   | 14  | - | 23  | 1 | --- | K.FMNPTDQARK.E                             |
| 1522.7052 | 1521.6979 | 1521.7830 | -55.88 | 162 | - | 174 | 1 | --- | K.VKGMNLCVTMTLR.E                          |
| 1538.7010 | 1537.6937 | 1537.7779 | -54.72 | 162 | - | 174 | 1 | --- | K.VKGMNLCVTMTLR.E + Oxidation (M)          |
| 1554.6993 | 1553.6920 | 1553.7728 | -51.99 | 162 | - | 174 | 1 | --- | K.VKGMNLCVTMTLR.E + 2 Oxidation (M)        |
| 2211.0193 | 2210.0120 | 2210.1538 | -64.16 | 144 | - | 163 | 1 | --- | R.LSMTTTLMTATVTDQVEKV.G + Oxidation (M)    |
| 2528.2617 | 2527.2544 | 2527.2662 | -4.67  | 140 | - | 161 | 1 | --- | K.TWTRLSMTTTLMTATVTDQVEK.V + Oxidation (M) |

**No match to:** 813.4393, 834.4629, 842.4641, 846.4475, 848.4780, 850.0118, 850.4896, 850.4896, 853.4691, 856.4822, 864.4857, 865.9818, 868.5015, 868.5015, 870.4977, 876.9884, 892.9574, 892.9574, 896.3969, 908.9280, 951.5720, 996.5430, 1017.6157, 1017.6157, 1019.6299, 1033.6429, 1045.5127, 1045.5127, 1051.6522, 1051.6522, 1065.6028, 1131.6493, 1133.6587, 1147.6777, 1151.6696, 1169.5313, 1171.6676, 1179.5499, 1184.6520, 1185.6776, 1185.6776, 1189.6735, 1203.6858, 1211.6572, 1225.6708, 1279.7007, 1300.7860, 1316.8134, 1334.8168, 1334.8168, 1440.5756, 1448.8479, 1448.8479, 1475.6846, 1533.7407, 1581.7728, 1617.9867, 1617.9867, 1732.0165, 1901.1586, 2015.1949, 2283.0847, 2305.0740, 2321.0552

11. [FLN206](#) Mass: 54723 Score: 39 Expect: 19 Matches: 12

Dihydrolipoyl dehydrogenase OS=Bos taurus OX=9913 GN=DLD PE=1 SV=2

| Observed  | Mr(expt)  | Mr(calc)  | ppm    | Start | End | Miss | Ions | Peptide |                               |
|-----------|-----------|-----------|--------|-------|-----|------|------|---------|-------------------------------|
| 868.5015  | 867.4942  | 867.4524  | 48.2   | 7     | -   | 13   | 0    | ---     | R.VYCSLVK.R                   |
| 868.5015  | 867.4943  | 867.4524  | 48.2   | 7     | -   | 13   | 0    | ---     | R.VYCSLVK.R                   |
| 1017.6157 | 1016.6084 | 1016.5614 | 46.2   | 441   | -   | 449  | 1    | ---     | K.ILGQKSTDR.V                 |
| 1017.6157 | 1016.6084 | 1016.5614 | 46.2   | 441   | -   | 449  | 1    | ---     | K.ILGQKSTDR.V                 |
| 1151.6696 | 1150.6623 | 1150.5870 | 65.5   | 411   | -   | 420  | 1    | ---     | K.EEGIEYKVGK.F                |
| 1165.6809 | 1164.6736 | 1164.5631 | 94.9   | 123   | -   | 132  | 1    | ---     | K.MMEQKSNVAVK.A               |
| 1165.6809 | 1164.6736 | 1164.5631 | 94.9   | 123   | -   | 132  | 1    | ---     | K.MMEQKSNVAVK.A               |
| 1193.6417 | 1192.6344 | 1192.6353 | -0.72  | 418   | -   | 428  | 1    | ---     | K.VGKFPFAANSR.A               |
| 1203.6858 | 1202.6785 | 1202.6772 | 1.14   | 337   | -   | 346  | 1    | ---     | R.IPVNTRFQTK.I                |
| 1279.7007 | 1278.6934 | 1278.6311 | 48.7   | 118   | -   | 127  | 1    | ---     | R.LNLEKMMQK.S + Oxidation (M) |
| 1533.7407 | 1532.7334 | 1532.7682 | -22.69 | 285   | -   | 300  | 1    | ---     | K.SDGKIDVSI EAASGGK.A         |
| 1581.7728 | 1580.7655 | 1580.7569 | 5.44   | 405   | -   | 417  | 1    | ---     | K.SEEQLKEEGIEYK.V             |

**No match to:** 813.4393, 834.4629, 838.4906, 842.4641, 846.4475, 848.4780, 850.0118, 850.4896, 850.4896, 853.4691, 856.4822, 864.4857, 865.9818, 866.4929, 870.4977, 876.9884, 882.5173, 882.5173, 892.9574, 892.9574, 896.3969, 908.9280, 951.5720, 996.5430, 1019.6299, 1033.6429, 1045.5127, 1045.5127, 1051.6522, 1051.6522, 1065.6028, 1131.6493, 1133.6587, 1147.6777, 1169.5313, 1171.6676, 1179.5499, 1184.6520, 1185.6776, 1185.6776, 1189.6735, 1207.6569, 1211.6572, 1225.6708, 1300.7860, 1316.8134, 1334.8168, 1334.8168, 1440.5756, 1448.8479, 1448.8479, 1475.6846, 1522.7052, 1538.7010, 1554.6993, 1617.9867, 1617.9867, 1732.0165, 1901.1586, 2015.1949, 2211.0193, 2283.0847, 2305.0740, 2321.0552, 2528.2617

12. [A0A4W2H686](#) Mass: 54723 Score: 39 Expect: 19 Matches: 12

Dihydrolipoyl dehydrogenase OS=Bos indicus x Bos taurus OX=30522 GN=DLD PE=3 SV=1

| Observed  | Mr(expt)  | Mr(calc)  | ppm    | Start | End | Miss | Ions | Peptide |                               |
|-----------|-----------|-----------|--------|-------|-----|------|------|---------|-------------------------------|
| 868.5015  | 867.4942  | 867.4524  | 48.2   | 7     | -   | 13   | 0    | ---     | R.VYCSLVK.R                   |
| 868.5015  | 867.4943  | 867.4524  | 48.2   | 7     | -   | 13   | 0    | ---     | R.VYCSLVK.R                   |
| 1017.6157 | 1016.6084 | 1016.5614 | 46.2   | 441   | -   | 449  | 1    | ---     | K.ILGQKSTDR.V                 |
| 1017.6157 | 1016.6084 | 1016.5614 | 46.2   | 441   | -   | 449  | 1    | ---     | K.ILGQKSTDR.V                 |
| 1151.6696 | 1150.6623 | 1150.5870 | 65.5   | 411   | -   | 420  | 1    | ---     | K.EEGIEYKVGK.F                |
| 1165.6809 | 1164.6736 | 1164.5631 | 94.9   | 123   | -   | 132  | 1    | ---     | K.MMEQKSNVAVK.A               |
| 1165.6809 | 1164.6736 | 1164.5631 | 94.9   | 123   | -   | 132  | 1    | ---     | K.MMEQKSNVAVK.A               |
| 1193.6417 | 1192.6344 | 1192.6353 | -0.72  | 418   | -   | 428  | 1    | ---     | K.VGKFPFAANSR.A               |
| 1203.6858 | 1202.6785 | 1202.6772 | 1.14   | 337   | -   | 346  | 1    | ---     | R.IPVNTRFQTK.I                |
| 1279.7007 | 1278.6934 | 1278.6311 | 48.7   | 118   | -   | 127  | 1    | ---     | R.LNLEKMMQK.S + Oxidation (M) |
| 1533.7407 | 1532.7334 | 1532.7682 | -22.69 | 285   | -   | 300  | 1    | ---     | K.SDGKIDVSI EAASGGK.A         |
| 1581.7728 | 1580.7655 | 1580.7569 | 5.44   | 405   | -   | 417  | 1    | ---     | K.SEEQLKEEGIEYK.V             |

**No match to:** 813.4393, 834.4629, 838.4906, 842.4641, 846.4475, 848.4780, 850.0118, 850.4896, 850.4896, 853.4691, 856.4822, 864.4857, 865.9818, 866.4929, 870.4977, 876.9884, 882.5173, 882.5173, 892.9574, 892.9574, 896.3969, 908.9280, 951.5720, 996.5430, 1019.6299, 1033.6429, 1045.5127, 1045.5127, 1051.6522, 1051.6522, 1065.6028, 1131.6493, 1133.6587, 1147.6777, 1169.5313, 1171.6676, 1179.5499, 1184.6520, 1185.6776, 1185.6776, 1189.6735, 1207.6569, 1211.6572, 1225.6708, 1300.7860, 1316.8134, 1334.8168, 1334.8168, 1440.5756, 1448.8479, 1448.8479, 1475.6846, 1522.7052, 1538.7010, 1554.6993, 1617.9867, 1617.9867, 1732.0165, 1901.1586, 2015.1949, 2211.0193, 2283.0847, 2305.0740, 2321.0552, 2528.2617

13. [A0A4W2H5Z2](#) Mass: 33370 Score: 38 Expect: 19 Matches: 10

Ketohexokinase OS=Bos indicus x Bos taurus OX=30522 GN=KHK PE=4 SV=1

| Observed  | Mr(expt)  | Mr(calc)  | ppm    | Start | End | Miss | Ions | Peptide |                   |
|-----------|-----------|-----------|--------|-------|-----|------|------|---------|-------------------|
| 834.4629  | 833.4556  | 833.4065  | 58.9   | 273   | -   | 279  | 0    | ---     | K.SMQEALR.F       |
| 850.4896  | 849.4823  | 849.4821  | 0.25   | 210   | -   | 216  | 1    | ---     | R.GLYSRVR.K       |
| 850.4896  | 849.4823  | 849.4821  | 0.30   | 210   | -   | 216  | 1    | ---     | R.GLYSRVR.K       |
| 866.4929  | 865.4856  | 865.4116  | 85.5   | 280   | -   | 287  | 0    | ---     | R.FGQVAGK.K       |
| 1065.6028 | 1064.5955 | 1064.4961 | 93.4   | 289   | -   | 298  | 0    | ---     | K.CGLQGFQDGV.-    |
| 1133.6587 | 1132.6514 | 1132.5560 | 84.3   | 32    | -   | 39   | 1    | ---     | R.CLSQRWR.G       |
| 1185.6776 | 1184.6703 | 1184.6454 | 21.0   | 133   | -   | 141  | 1    | ---     | R.FKWIHIEGR.N     |
| 1185.6776 | 1184.6703 | 1184.6454 | 21.0   | 133   | -   | 141  | 1    | ---     | R.FKWIHIEGR.N     |
| 1193.6417 | 1192.6344 | 1192.5911 | 36.4   | 288   | -   | 298  | 1    | ---     | K.KCGLQGFQDGV.-   |
| 1533.7407 | 1532.7334 | 1532.7695 | -23.55 | 153   | -   | 165  | 1    | ---     | R.IEQHNARQPPESK.I |

**No match to:** 813.4393, 838.4906, 842.4641, 846.4475, 848.4780, 850.0118, 853.4691, 856.4822, 864.4857, 865.9818, 868.5015, 868.5015, 870.4977, 876.9884, 882.5173, 882.5173, 892.9574, 892.9574, 896.3969, 908.9280, 951.5720, 996.5430, 1017.6157, 1017.6157, 1019.6299, 1033.6429, 1045.5127, 1045.5127, 1051.6522, 1051.6522, 1131.6493, 1147.6777, 1151.6696, 1165.6809, 1165.6809, 1169.5313, 1171.6676, 1179.5499, 1184.6520, 1189.6735, 1203.6858, 1207.6569, 1211.6572, 1225.6708, 1279.7007, 1300.7860, 1316.8134, 1334.8168, 1334.8168, 1440.5756, 1448.8479, 1448.8479, 1475.6846, 1522.7052, 1538.7010, 1554.6993, 1581.7728, 1617.9867, 1617.9867, 1732.0165, 1901.1586, 2015.1949, 2211.0193, 2283.0847, 2305.0740, 2321.0552, 2528.2617

14. [A0A3Q1N4Y2](#) Mass: 25122 Score: 38 Expect: 20 Matches: 13

Uncharacterized protein OS=Bos taurus OX=9913 PE=4 SV=1

| Observed | Mr(expt) | Mr(calc) | ppm | Start | End | Miss | Ions | Peptide |
|----------|----------|----------|-----|-------|-----|------|------|---------|
|----------|----------|----------|-----|-------|-----|------|------|---------|

|                                                                                                                                                                                                                                                                                                                                                                                                                                                                                                                                                                                                                                                                                                             |           |           |        |     |   |     |   |     |                                             |
|-------------------------------------------------------------------------------------------------------------------------------------------------------------------------------------------------------------------------------------------------------------------------------------------------------------------------------------------------------------------------------------------------------------------------------------------------------------------------------------------------------------------------------------------------------------------------------------------------------------------------------------------------------------------------------------------------------------|-----------|-----------|--------|-----|---|-----|---|-----|---------------------------------------------|
| 838.4906                                                                                                                                                                                                                                                                                                                                                                                                                                                                                                                                                                                                                                                                                                    | 837.4833  | 837.5072  | -28.53 | 49  | - | 55  | 0 | --- | K.DPKPIIR.D                                 |
| 866.4929                                                                                                                                                                                                                                                                                                                                                                                                                                                                                                                                                                                                                                                                                                    | 865.4856  | 865.4215  | 74.1   | 175 | - | 181 | 1 | --- | R.ETTMEKEK.S                                |
| 882.5173                                                                                                                                                                                                                                                                                                                                                                                                                                                                                                                                                                                                                                                                                                    | 881.5100  | 881.4454  | 73.3   | 5   | - | 13  | 1 | --- | R.STSSTKSGK.F                               |
| 882.5173                                                                                                                                                                                                                                                                                                                                                                                                                                                                                                                                                                                                                                                                                                    | 881.5100  | 881.4454  | 73.3   | 5   | - | 13  | 1 | --- | R.STSSTKSGK.F                               |
| 1165.6809                                                                                                                                                                                                                                                                                                                                                                                                                                                                                                                                                                                                                                                                                                   | 1164.6736 | 1164.6026 | 61.0   | 98  | - | 106 | 1 | --- | R.KLEVEYEQK.R                               |
| 1165.6809                                                                                                                                                                                                                                                                                                                                                                                                                                                                                                                                                                                                                                                                                                   | 1164.6736 | 1164.6026 | 61.0   | 98  | - | 106 | 1 | --- | R.KLEVEYEQK.R                               |
| 1193.6417                                                                                                                                                                                                                                                                                                                                                                                                                                                                                                                                                                                                                                                                                                   | 1192.6344 | 1192.6088 | 21.5   | 99  | - | 107 | 1 | --- | K.LEVEYEQKR.A                               |
| 1207.6569                                                                                                                                                                                                                                                                                                                                                                                                                                                                                                                                                                                                                                                                                                   | 1206.6496 | 1206.5815 | 56.4   | 14  | - | 23  | 1 | --- | K.FMNPTDQARK.E                              |
| 1522.7052                                                                                                                                                                                                                                                                                                                                                                                                                                                                                                                                                                                                                                                                                                   | 1521.6979 | 1521.7830 | -55.88 | 162 | - | 174 | 1 | --- | K.VKGMNLCVTMTLR.E                           |
| 1538.7010                                                                                                                                                                                                                                                                                                                                                                                                                                                                                                                                                                                                                                                                                                   | 1537.6937 | 1537.7779 | -54.72 | 162 | - | 174 | 1 | --- | K.VKGMNLCVTMTLR.E + Oxidation (M)           |
| 1554.6993                                                                                                                                                                                                                                                                                                                                                                                                                                                                                                                                                                                                                                                                                                   | 1553.6920 | 1553.7728 | -51.99 | 162 | - | 174 | 1 | --- | K.VKGMNLCVTMTLR.E + 2 Oxidation (M)         |
| 2211.0193                                                                                                                                                                                                                                                                                                                                                                                                                                                                                                                                                                                                                                                                                                   | 2210.0120 | 2210.1538 | -64.16 | 144 | - | 163 | 1 | --- | R.LSMTTVLMTATVTDQVEKVK.G + Oxidation (M)    |
| 2528.2617                                                                                                                                                                                                                                                                                                                                                                                                                                                                                                                                                                                                                                                                                                   | 2527.2544 | 2527.2662 | -4.67  | 140 | - | 161 | 1 | --- | K.TWTRLRSMTTVLMTATVTDQVEK.V + Oxidation (M) |
| No match to: 813.4393, 834.4629, 842.4641, 846.4475, 848.4780, 850.0118, 850.4896, 850.4896, 853.4691, 856.4822, 864.4857, 865.9818, 868.5015, 870.4977, 876.9884, 892.9574, 892.9574, 896.3969, 908.9280, 951.5720, 996.5430, 1017.6157, 1017.6157, 1019.6299, 1033.6429, 1045.5127, 1045.5127, 1051.6522, 1051.6522, 1065.6028, 1131.6493, 1133.6587, 1147.6777, 1151.6696, 1169.5313, 1171.6676, 1179.5499, 1184.6520, 1185.6776, 1185.6776, 1189.6735, 1203.6858, 1211.6572, 1225.6708, 1279.7007, 1300.7860, 1316.8134, 1334.8168, 1334.8168, 1440.5756, 1448.8479, 1448.8479, 1475.6846, 1533.7407, 1581.7728, 1617.9867, 1617.9867, 1732.0165, 1901.1586, 2015.1949, 2283.0847, 2305.0740, 2321.0552 |           |           |        |     |   |     |   |     |                                             |

15. [F6PSE2](#) Mass: 92262 Score: 38 Expect: 21 Matches: 13

Nibrin OS=Bos taurus OX=9913 GN=NB N PE=4 SV=2

| observed                                                                                                                                                                                                                                                                                                                                                                                                                                                                                                                                                                                                                                                                                                              | Mr(expt)  | Mr(calc)  | ppm    | Start | End   | Miss | Ions | Peptide                                  |
|-----------------------------------------------------------------------------------------------------------------------------------------------------------------------------------------------------------------------------------------------------------------------------------------------------------------------------------------------------------------------------------------------------------------------------------------------------------------------------------------------------------------------------------------------------------------------------------------------------------------------------------------------------------------------------------------------------------------------|-----------|-----------|--------|-------|-------|------|------|------------------------------------------|
| 846.4475                                                                                                                                                                                                                                                                                                                                                                                                                                                                                                                                                                                                                                                                                                              | 845.4402  | 845.4494  | -10.87 | 305   | - 311 | 0    | ---  | R.LITEENK.E                              |
| 850.4896                                                                                                                                                                                                                                                                                                                                                                                                                                                                                                                                                                                                                                                                                                              | 849.4823  | 849.4232  | 69.5   | 684   | - 690 | 0    | ---  | K.ESLWSTK.E                              |
| 850.4896                                                                                                                                                                                                                                                                                                                                                                                                                                                                                                                                                                                                                                                                                                              | 849.4823  | 849.4232  | 69.6   | 684   | - 690 | 0    | ---  | K.ESLWSTK.E                              |
| 951.5720                                                                                                                                                                                                                                                                                                                                                                                                                                                                                                                                                                                                                                                                                                              | 950.5647  | 950.5073  | 60.4   | 594   | - 601 | 0    | ---  | K.SLFTENLK.S                             |
| 1131.6493                                                                                                                                                                                                                                                                                                                                                                                                                                                                                                                                                                                                                                                                                                             | 1130.6420 | 1130.6118 | 26.8   | 137   | - 146 | 0    | ---  | K.MQNGLSQILK.S                           |
| 1147.6777                                                                                                                                                                                                                                                                                                                                                                                                                                                                                                                                                                                                                                                                                                             | 1146.6704 | 1146.6067 | 55.6   | 137   | - 146 | 0    | ---  | K.MQNGLSQILK.S + Oxidation (M)           |
| 1189.6735                                                                                                                                                                                                                                                                                                                                                                                                                                                                                                                                                                                                                                                                                                             | 1188.6662 | 1188.5775 | 74.7   | 771   | - 779 | 0    | ---  | K.NTELEEWLR.Q                            |
| 1207.6569                                                                                                                                                                                                                                                                                                                                                                                                                                                                                                                                                                                                                                                                                                             | 1206.6496 | 1206.6318 | 14.8   | 438   | - 447 | 1    | ---  | K.EIKIFGMEPK.C + Oxidation (M)           |
| 1316.8134                                                                                                                                                                                                                                                                                                                                                                                                                                                                                                                                                                                                                                                                                                             | 1315.8061 | 1315.6925 | 86.4   | 151   | - 161 | 1    | ---  | R.VTFGVFESKFR.V                          |
| 1522.7052                                                                                                                                                                                                                                                                                                                                                                                                                                                                                                                                                                                                                                                                                                             | 1521.6979 | 1521.8416 | -94.39 | 16    | - 29  | 1    | ---  | R.LPGLWASGLPERAR.C                       |
| 1538.7010                                                                                                                                                                                                                                                                                                                                                                                                                                                                                                                                                                                                                                                                                                             | 1537.6937 | 1537.7386 | -29.17 | 498   | - 510 | 0    | ---  | R.GWPSQHQQTNSIR.D                        |
| 2211.0193                                                                                                                                                                                                                                                                                                                                                                                                                                                                                                                                                                                                                                                                                                             | 2210.0120 | 2210.0559 | -19.84 | 539   | - 557 | 0    | ---  | R.METSCSLLEQTQPTTSLIR.K + Oxidation (M)  |
| 2528.2617                                                                                                                                                                                                                                                                                                                                                                                                                                                                                                                                                                                                                                                                                                             | 2527.2544 | 2527.1761 | 31.0   | 771   | - 790 | 1    | ---  | K.NTELEEWLRQEMEVRQNQHAKE + Oxidation (M) |
| No match to: 813.4393, 834.4629, 838.4906, 842.4641, 848.4780, 850.0118, 853.4691, 856.4822, 864.4857, 865.9818, 866.4929, 868.5015, 868.5015, 870.4977, 876.9884, 882.5173, 882.5173, 892.9574, 892.9574, 896.3969, 908.9280, 996.5430, 1017.6157, 1017.6157, 1019.6299, 1033.6429, 1045.5127, 1045.5127, 1051.6522, 1051.6522, 1065.6028, 1133.6587, 1151.6696, 1165.6809, 1165.6809, 1169.5313, 1171.6676, 1179.5499, 1184.6520, 1185.6776, 1185.6776, 1193.6417, 1203.6858, 1211.6572, 1225.6708, 1279.7007, 1300.7860, 1334.8168, 1334.8168, 1440.5756, 1448.8479, 1448.8479, 1475.6846, 1533.7407, 1554.6993, 1581.7728, 1617.9867, 1617.9867, 1732.0165, 1901.1586, 2015.1949, 2283.0847, 2305.0740, 2321.0552 |           |           |        |       |       |      |      |                                          |

16. [A0A4W2CAE8](#) Mass: 92262 Score: 38 Expect: 21 Matches: 13

Nibrin OS=Bos indicus x Bos taurus OX=30522 GN=NB N PE=4 SV=1

| observed                                                                                                                                                                                                                                                                                                                                                                                                                                                                                                                                                                                                                                                                                                              | Mr(expt)  | Mr(calc)  | ppm    | Start | End | Miss | Ions  | Peptide                                   |
|-----------------------------------------------------------------------------------------------------------------------------------------------------------------------------------------------------------------------------------------------------------------------------------------------------------------------------------------------------------------------------------------------------------------------------------------------------------------------------------------------------------------------------------------------------------------------------------------------------------------------------------------------------------------------------------------------------------------------|-----------|-----------|--------|-------|-----|------|-------|-------------------------------------------|
| 846.4475                                                                                                                                                                                                                                                                                                                                                                                                                                                                                                                                                                                                                                                                                                              | 845.4402  | 845.4494  | -10.87 | 305   | -   | 311  | 0 --- | R.LITEENK.E                               |
| 850.4896                                                                                                                                                                                                                                                                                                                                                                                                                                                                                                                                                                                                                                                                                                              | 849.4823  | 849.4232  | 69.5   | 684   | -   | 690  | 0 --- | K.ESLWSTK.E                               |
| 850.4896                                                                                                                                                                                                                                                                                                                                                                                                                                                                                                                                                                                                                                                                                                              | 849.4823  | 849.4232  | 69.6   | 684   | -   | 690  | 0 --- | K.ESLWSTK.E                               |
| 951.5720                                                                                                                                                                                                                                                                                                                                                                                                                                                                                                                                                                                                                                                                                                              | 950.5647  | 950.5073  | 60.4   | 594   | -   | 601  | 0 --- | K.SLFTENLK.S                              |
| 1131.6493                                                                                                                                                                                                                                                                                                                                                                                                                                                                                                                                                                                                                                                                                                             | 1130.6420 | 1130.6118 | 26.8   | 137   | -   | 146  | 0 --- | K.MQNGLSQILK.S                            |
| 1147.6777                                                                                                                                                                                                                                                                                                                                                                                                                                                                                                                                                                                                                                                                                                             | 1146.6704 | 1146.6067 | 55.6   | 137   | -   | 146  | 0 --- | K.MQNGLSQILK.S + Oxidation (M)            |
| 1189.6735                                                                                                                                                                                                                                                                                                                                                                                                                                                                                                                                                                                                                                                                                                             | 1188.6662 | 1188.5775 | 74.7   | 771   | -   | 779  | 0 --- | K.NTELEEWLR.Q                             |
| 1207.6569                                                                                                                                                                                                                                                                                                                                                                                                                                                                                                                                                                                                                                                                                                             | 1206.6496 | 1206.6318 | 14.8   | 438   | -   | 447  | 1 --- | K.EIKIFGMEPK.C + Oxidation (M)            |
| 1316.8134                                                                                                                                                                                                                                                                                                                                                                                                                                                                                                                                                                                                                                                                                                             | 1315.8061 | 1315.6925 | 86.4   | 151   | -   | 161  | 1 --- | R.VTFGVFESKFR.V                           |
| 1522.7052                                                                                                                                                                                                                                                                                                                                                                                                                                                                                                                                                                                                                                                                                                             | 1521.6979 | 1521.8416 | -94.39 | 16    | -   | 29   | 1 --- | R.LPGLWASGLPERAR.C                        |
| 1538.7010                                                                                                                                                                                                                                                                                                                                                                                                                                                                                                                                                                                                                                                                                                             | 1537.6937 | 1537.7386 | -29.17 | 498   | -   | 510  | 0 --- | R.GWPSQHQQTNSIR.D                         |
| 2211.0193                                                                                                                                                                                                                                                                                                                                                                                                                                                                                                                                                                                                                                                                                                             | 2210.0120 | 2210.0559 | -19.84 | 539   | -   | 557  | 0 --- | R.METSCSLLEQTQPTSLIR.K + Oxidation (M)    |
| 2528.2617                                                                                                                                                                                                                                                                                                                                                                                                                                                                                                                                                                                                                                                                                                             | 2527.2544 | 2527.1761 | 31.0   | 771   | -   | 790  | 1 --- | K.NTELEEWLRQEMEVRQNQHAK.E + Oxidation (M) |
| No match to: 813.4393, 834.4629, 838.4906, 842.4641, 848.4780, 850.0118, 853.4691, 856.4822, 864.4857, 865.9818, 866.4929, 868.5015, 868.5015, 870.4977, 876.9884, 882.5173, 882.5173, 892.9574, 892.9574, 896.3969, 908.9280, 996.5430, 1017.6157, 1017.6157, 1019.6299, 1033.6429, 1045.5127, 1045.5127, 1051.6522, 1051.6522, 1065.6028, 1133.6587, 1151.6696, 1165.6809, 1165.6809, 1169.5313, 1171.6676, 1179.5499, 1184.6520, 1185.6776, 1185.6776, 1193.6417, 1203.6858, 1211.6572, 1225.6708, 1279.7007, 1300.7860, 1334.8168, 1334.8168, 1440.5756, 1448.8479, 1448.8479, 1475.6846, 1533.7407, 1554.6993, 1581.7728, 1617.9867, 1617.9867, 1732.0165, 1901.1586, 2015.1949, 2283.0847, 2305.0740, 2321.0552 |           |           |        |       |     |      |       |                                           |

17. [A0A4W2BNU6](#) Mass: 41726 Score: 38 Expect: 21 Matches: 11

Dehydrogenase/reductase 12 OS=Bos indicus x Bos taurus OX=30522 GN=DHRS12 PE=4 SV=1

| observed                                                                                                                                                                                                                                                                                                                                                                                                                                                                                                                                                                                                                                                                                                                                    | Mr(expt)  | Mr(calc)  | ppm    | Start | End | Miss | Ions | Peptide                                  |
|---------------------------------------------------------------------------------------------------------------------------------------------------------------------------------------------------------------------------------------------------------------------------------------------------------------------------------------------------------------------------------------------------------------------------------------------------------------------------------------------------------------------------------------------------------------------------------------------------------------------------------------------------------------------------------------------------------------------------------------------|-----------|-----------|--------|-------|-----|------|------|------------------------------------------|
| 834.4629                                                                                                                                                                                                                                                                                                                                                                                                                                                                                                                                                                                                                                                                                                                                    | 833.4556  | 833.4317  | 28.8   | 55    | -   | 62   | 0    | --- K.ATAMEIAK.R                         |
| 850.4896                                                                                                                                                                                                                                                                                                                                                                                                                                                                                                                                                                                                                                                                                                                                    | 849.4823  | 849.4266  | 65.6   | 55    | -   | 62   | 0    | --- K.ATAMEIAK.R + Oxidation (M)         |
| 850.4896                                                                                                                                                                                                                                                                                                                                                                                                                                                                                                                                                                                                                                                                                                                                    | 849.4823  | 849.4266  | 65.6   | 55    | -   | 62   | 0    | --- K.ATAMEIAK.R + Oxidation (M)         |
| 866.4929                                                                                                                                                                                                                                                                                                                                                                                                                                                                                                                                                                                                                                                                                                                                    | 865.4856  | 865.4657  | 23.0   | 13    | -   | 19   | 1    | --- K.GLREYTK.S                          |
| 1133.6587                                                                                                                                                                                                                                                                                                                                                                                                                                                                                                                                                                                                                                                                                                                                   | 1132.6514 | 1132.5989 | 46.4   | 224   | -   | 233  | 1    | --- R.VEVRGFSPPR.G                       |
| 1189.6735                                                                                                                                                                                                                                                                                                                                                                                                                                                                                                                                                                                                                                                                                                                                   | 1188.6662 | 1188.5986 | 56.9   | 133   | -   | 142  | 1    | --- K.RELTEDGLEK.N                       |
| 1334.8168                                                                                                                                                                                                                                                                                                                                                                                                                                                                                                                                                                                                                                                                                                                                   | 1333.8095 | 1333.7276 | 61.4   | 170   | -   | 182  | 0    | --- R.VITVSSGGMLVQK.L + Oxidation (M)    |
| 1334.8168                                                                                                                                                                                                                                                                                                                                                                                                                                                                                                                                                                                                                                                                                                                                   | 1333.8095 | 1333.7276 | 61.5   | 170   | -   | 182  | 0    | --- R.VITVSSGGMLVQK.L + Oxidation (M)    |
| 1533.7407                                                                                                                                                                                                                                                                                                                                                                                                                                                                                                                                                                                                                                                                                                                                   | 1532.7334 | 1532.6936 | 26.0   | 359   | -   | 371  | 1    | --- R.NRTCVSHVSTGR.Q                     |
| 1901.1586                                                                                                                                                                                                                                                                                                                                                                                                                                                                                                                                                                                                                                                                                                                                   | 1900.1513 | 1900.0101 | 74.3   | 342   | -   | 358  | 1    | --- R.ILGWVMPSSRGSSRPR.N + Oxidation (M) |
| 2211.0193                                                                                                                                                                                                                                                                                                                                                                                                                                                                                                                                                                                                                                                                                                                                   | 2210.0120 | 2210.1048 | -41.98 | 115   | -   | 133  | 1    | --- K.QEHTLNVLINNAGCMVNRK.E              |
| No match to: 813.4393, 838.4906, 842.4641, 846.4475, 848.4780, 850.0118, 853.4691, 856.4822, 864.4857, 865.9818, 868.5015, 868.5015, 870.4977, 876.9884, 882.5173, 882.5173, 892.9574, 892.9574, 896.3969, 908.9280, 951.5720, 996.5430, 1017.6157, 1017.6157, 1019.6299, 1033.6429, 1045.5127, 1045.5127, 1051.6522, 1051.6522, 1065.6028, 1131.6493, 1147.6777, 1151.6696, 1165.6809, 1165.6809, 1169.5313, 1171.6676, 1179.5499, 1184.6520, 1185.6776, 1185.6776, 1193.6417, 1203.6858, 1207.6569, 1211.6572, 1225.6708, 1279.7007, 1300.7860, 1316.8134, 1440.5756, 1448.8479, 1448.8479, 1475.6846, 1522.7052, 1538.7010, 1554.6993, 1581.7728, 1617.9867, 1617.9867, 1732.0165, 2015.1949, 2283.0847, 2305.0740, 2321.0552, 2528.2617 |           |           |        |       |     |      |      |                                          |



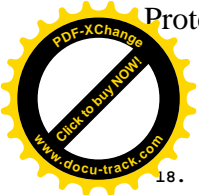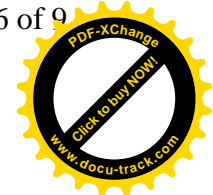

18. [A0A3Q1M3R6](#) Mass: 41726 Score: 38 Expect: 21 Matches: 11  
Dehydrogenase/reductase SDR family member 12 OS=Bos taurus OX=9913 GN=DHRS12 PE=4 SV=1
- | Observed  | Mr(expt)  | Mr(calc)  | ppm    | Start | End | Miss | Ions | Peptide                             |
|-----------|-----------|-----------|--------|-------|-----|------|------|-------------------------------------|
| 834.4629  | 833.4556  | 833.4317  | 28.8   | 55    | 62  | 0    | ---  | K.ATAMEIAK.R                        |
| 850.4896  | 849.4823  | 849.4266  | 65.6   | 55    | 62  | 0    | ---  | K.ATAMEIAK.R + Oxidation (M)        |
| 850.4896  | 849.4823  | 849.4266  | 65.6   | 55    | 62  | 0    | ---  | K.ATAMEIAK.R + Oxidation (M)        |
| 866.4929  | 865.4856  | 865.4657  | 23.0   | 13    | 19  | 1    | ---  | K.GLREYTK.S                         |
| 1133.6587 | 1132.6514 | 1132.5989 | 46.4   | 224   | 233 | 1    | ---  | R.VEVRGFSSPR.G                      |
| 1189.6735 | 1188.6662 | 1188.5986 | 56.9   | 133   | 142 | 1    | ---  | K.RELTEDGLEK.N                      |
| 1334.8168 | 1333.8095 | 1333.7276 | 61.4   | 170   | 182 | 0    | ---  | R.VITVSSGGMLVQK.L + Oxidation (M)   |
| 1334.8168 | 1333.8095 | 1333.7276 | 61.5   | 170   | 182 | 0    | ---  | R.VITVSSGGMLVQK.L + Oxidation (M)   |
| 1533.7407 | 1532.7334 | 1532.6936 | 26.0   | 359   | 371 | 1    | ---  | R.NRTCCHSVSTGR.Q                    |
| 1901.1586 | 1900.1513 | 1900.0101 | 74.3   | 342   | 358 | 1    | ---  | R.ILGWVMPSSRGSSRP.N + Oxidation (M) |
| 2211.0193 | 2210.0120 | 2210.1048 | -41.98 | 115   | 133 | 1    | ---  | K.QEHTLNVLINNAGCMVNKR.E             |
- No match to: 813.4393, 838.4906, 842.4641, 846.4475, 848.4780, 850.0118, 853.4691, 856.4822, 864.4857, 865.9818, 868.5015, 868.5015, 870.4977, 876.9884, 882.5173, 882.5173, 892.9574, 892.9574, 896.3969, 908.9280, 951.5720, 996.5430, 1017.6157, 1017.6157, 1019.6299, 1033.6429, 1045.5127, 1045.5127, 1051.6522, 1051.6522, 1065.6028, 1131.6493, 1147.6777, 1151.6696, 1165.6809, 1165.6809, 1169.5313, 1171.6676, 1179.5499, 1184.6520, 1185.6776, 1185.6776, 1193.6417, 1203.6858, 1203.6858, 1207.6569, 1211.6572, 1225.6708, 1279.7007, 1300.7860, 1316.8134, 1440.5756, 1448.8479, 1448.8479, 1475.6846, 1522.7052, 1538.7010, 1554.6993, 1581.7728, 1617.9867, 1617.9867, 1732.0165, 2015.1949, 2283.0847, 2305.0740, 2321.0552, 2528.2617
19. [A0A4W2E9U7](#) Mass: 76824 Score: 38 Expect: 21 Matches: 12  
Nibrin OS=Bos indicus x Bos taurus OX=30522 GN=NBIN PE=4 SV=1
- | Observed  | Mr(expt)  | Mr(calc)  | ppm    | Start | End | Miss | Ions | Peptide                                  |
|-----------|-----------|-----------|--------|-------|-----|------|------|------------------------------------------|
| 846.4475  | 845.4402  | 845.4494  | -10.87 | 169   | 175 | 0    | ---  | R.LITEENK.E                              |
| 850.4896  | 849.4823  | 849.4232  | 69.5   | 547   | 553 | 0    | ---  | K.ESLWSTK.E                              |
| 850.4896  | 849.4823  | 849.4232  | 69.6   | 547   | 553 | 0    | ---  | K.ESLWSTK.E                              |
| 951.5720  | 950.5647  | 950.5073  | 60.4   | 457   | 464 | 0    | ---  | K.SLFTEENLK.S                            |
| 1131.6493 | 1130.6420 | 1130.6118 | 26.8   | 1     | 10  | 0    | ---  | -MQNGLSQILK.S                            |
| 1147.6777 | 1146.6704 | 1146.6067 | 55.6   | 1     | 10  | 0    | ---  | -MQNGLSQILK.S + Oxidation (M)            |
| 1189.6735 | 1188.6662 | 1188.5775 | 74.7   | 634   | 642 | 0    | ---  | K.NTELEEWLR.Q                            |
| 1207.6569 | 1206.6496 | 1206.6318 | 14.8   | 301   | 310 | 1    | ---  | K.EIKIFGMEPK.C + Oxidation (M)           |
| 1316.8134 | 1315.8061 | 1315.6925 | 86.4   | 15    | 25  | 1    | ---  | R.VTFGVFESKFR.V                          |
| 1538.7010 | 1537.6937 | 1537.7386 | -29.17 | 361   | 373 | 0    | ---  | R.GWPSQHQQTNSIR.D                        |
| 2211.0193 | 2210.0120 | 2210.0559 | -19.84 | 402   | 420 | 0    | ---  | R.METSCSLLEQTQPTTSLIR.K + Oxidation (M)  |
| 2528.2617 | 2527.2544 | 2527.1761 | 31.0   | 634   | 653 | 1    | ---  | K.NTELEEWLRQEMEVCNQHAK.E + Oxidation (M) |
- No match to: 813.4393, 834.4629, 838.4906, 842.4641, 846.4475, 848.4780, 850.0118, 853.4691, 856.4822, 864.4857, 865.9818, 866.4929, 868.5015, 868.5015, 870.4977, 876.9884, 882.5173, 882.5173, 892.9574, 892.9574, 896.3969, 908.9280, 996.5430, 1017.6157, 1017.6157, 1019.6299, 1033.6429, 1045.5127, 1045.5127, 1051.6522, 1051.6522, 1065.6028, 1133.6587, 1151.6696, 1165.6809, 1165.6809, 1169.5313, 1171.6676, 1179.5499, 1184.6520, 1185.6776, 1185.6776, 1193.6417, 1203.6858, 1211.6572, 1225.6708, 1279.7007, 1300.7860, 1334.8168, 1334.8168, 1440.5756, 1448.8479, 1448.8479, 1475.6846, 1522.7052, 1533.7407, 1554.6993, 1581.7728, 1617.9867, 1617.9867, 1732.0165, 1901.1586, 2015.1949, 2283.0847, 2305.0740, 2321.0552
20. [A0A4W2E4S5](#) Mass: 35275 Score: 38 Expect: 23 Matches: 7  
Kallikrein related peptidase 11 OS=Bos indicus x Bos taurus OX=30522 GN=KLK11 PE=3 SV=1
- | Observed  | Mr(expt)  | Mr(calc)  | ppm    | Start | End | Miss | Ions | Peptide                     |
|-----------|-----------|-----------|--------|-------|-----|------|------|-----------------------------|
| 848.4780  | 847.4707  | 847.4473  | 27.6   | 177   | 183 | 0    | ---  | R.NDIMLVK.M + Oxidation (M) |
| 951.5720  | 950.5647  | 950.4862  | 82.7   | 307   | 313 | 0    | ---  | K.YVDWIQK.T                 |
| 1179.5499 | 1178.5426 | 1178.6482 | -89.54 | 297   | 306 | 1    | ---  | K.KPGVYTKVCK.Y              |
| 1184.6520 | 1183.6447 | 1183.6747 | -25.32 | 113   | 123 | 0    | ---  | R.LLCGATLIAPR.W             |
| 1211.6572 | 1210.6499 | 1210.6604 | -8.69  | 231   | 240 | 1    | ---  | R.CANVTIHKHR.E              |
| 2015.1949 | 2014.1876 | 2013.9908 | 97.7   | 156   | 173 | 1    | ---  | R.TATKSFPHPDFNNSLPNK.D      |
| 2283.0847 | 2282.0774 | 2282.0975 | -8.78  | 136   | 155 | 1    | ---  | R.YVVLHGAHSLGRQDGCQTR.T     |
- No match to: 813.4393, 834.4629, 838.4906, 842.4641, 846.4475, 850.0118, 850.4896, 850.4896, 853.4691, 856.4822, 864.4857, 865.9818, 866.4929, 868.5015, 870.4977, 876.9884, 882.5173, 882.5173, 892.9574, 892.9574, 896.3969, 908.9280, 996.5430, 1017.6157, 1017.6157, 1019.6299, 1033.6429, 1045.5127, 1045.5127, 1051.6522, 1051.6522, 1065.6028, 1131.6493, 1133.6587, 1147.6777, 1151.6696, 1165.6809, 1165.6809, 1169.5313, 1171.6676, 1179.5499, 1184.6520, 1185.6776, 1185.6776, 1193.6417, 1203.6858, 1211.6572, 1225.6708, 1279.7007, 1300.7860, 1316.8134, 1334.8168, 1334.8168, 1440.5756, 1448.8479, 1448.8479, 1475.6846, 1522.7052, 1533.7407, 1554.6993, 1581.7728, 1617.9867, 1617.9867, 1732.0165, 1901.1586, 2015.1949, 2283.0847, 2305.0740, 2321.0552, 2528.2617
21. [Q5EA35](#) Mass: 33326 Score: 37 Expect: 24 Matches: 10  
Ketoheokinase OS=Bos taurus OX=9913 GN=KHK PE=2 SV=1
- | Observed  | Mr(expt)  | Mr(calc)  | ppm    | Start | End | Miss | Ions | Peptide           |
|-----------|-----------|-----------|--------|-------|-----|------|------|-------------------|
| 834.4629  | 833.4556  | 833.4065  | 58.9   | 273   | 279 | 0    | ---  | K.SMQEALR.F       |
| 850.4896  | 849.4823  | 849.4821  | 0.25   | 210   | 216 | 1    | ---  | R.GLYSRVR.K       |
| 850.4896  | 849.4823  | 849.4821  | 0.30   | 210   | 216 | 1    | ---  | R.GLYSRVR.K       |
| 866.4929  | 865.4856  | 865.4116  | 85.5   | 280   | 287 | 0    | ---  | R.FGCQVAGK.K      |
| 1065.6028 | 1064.5955 | 1064.4961 | 93.4   | 289   | 298 | 0    | ---  | K.CGLQGFQDQIV.-   |
| 1133.6587 | 1132.6514 | 1132.5560 | 84.3   | 32    | 39  | 1    | ---  | R.CLSQRWQR.G      |
| 1185.6776 | 1184.6703 | 1184.6454 | 21.0   | 133   | 141 | 1    | ---  | R.FKWIHIEGR.N     |
| 1185.6776 | 1184.6703 | 1184.6454 | 21.0   | 133   | 141 | 1    | ---  | R.FKWIHIEGR.N     |
| 1193.6417 | 1192.6344 | 1192.5911 | 36.4   | 288   | 298 | 1    | ---  | K.KCGLQGFQDQIV.-  |
| 1533.7407 | 1532.7334 | 1532.7695 | -23.55 | 153   | 165 | 1    | ---  | R.IEQHNARQPPESK.I |
- No match to: 813.4393, 838.4906, 842.4641, 846.4475, 848.4780, 850.0118, 853.4691, 856.4822, 864.4857, 865.9818, 868.5015, 868.5015, 870.4977, 876.9884, 882.5173, 882.5173, 892.9574, 892.9574, 896.3969, 908.9280, 951.5720, 996.5430, 1017.6157, 1017.6157, 1019.6299, 1033.6429, 1045.5127, 1045.5127, 1051.6522, 1051.6522, 1131.6493, 1147.6777, 1151.6696, 1165.6809, 1165.6809, 1169.5313, 1171.6676, 1179.5499, 1184.6520, 1189.6735, 1203.6858, 1207.6569, 1211.6572, 1225.6708, 1279.7007, 1300.7860, 1316.8134, 1334.8168, 1334.8168, 1440.5756, 1448.8479, 1448.8479, 1475.6846, 1522.7052, 1538.7010, 1554.6993, 1581.7728, 1617.9867, 1617.9867, 1732.0165, 1901.1586, 2015.1949, 2211.0193, 2283.0847, 2305.0740, 2321.0552, 2528.2617
22. [Q0II75](#) Mass: 38414 Score: 37 Expect: 24 Matches: 10  
Ketoheokinase OS=Bos taurus OX=9913 GN=KHK PE=1 SV=1
- | Observed | Mr(expt) | Mr(calc) | ppm  | Start | End | Miss | Ions | Peptide     |
|----------|----------|----------|------|-------|-----|------|------|-------------|
| 834.4629 | 833.4556 | 833.4065 | 58.9 | 318   | 324 | 0    | ---  | K.SMQEALR.F |
| 850.4896 | 849.4823 | 849.4821 | 0.25 | 255   | 261 | 1    | ---  | R.GLYSRVR.K |

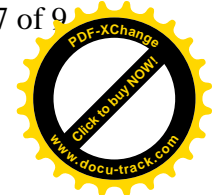

850.4896 849.4823 849.4821 0.30 255 - 261 1 --- R.GLYSRVR.K  
 866.4929 865.4856 865.4116 85.5 325 - 332 0 --- R.FGCQVAGK.K  
 1065.6028 1064.5955 1064.4961 93.4 334 - 343 0 --- K.CGLQGFDGIV.-  
 1133.6587 1132.6514 1132.5560 84.3 32 - 39 1 --- R.CLSQRWQR.G  
 1185.6776 1184.6703 1184.6454 21.0 178 - 186 1 --- R.FKWIHIEGR.N  
 1185.6776 1184.6703 1184.6454 21.0 178 - 186 1 --- R.FKWIHIEGR.N  
 1193.6417 1192.6344 1192.5911 36.4 333 - 343 1 --- K.KCGLQGFDGIV.-  
 1533.7407 1532.7334 1532.7695 -23.55 198 - 210 1 --- R.IEQHNARQPPEK.I  
**No match to:** 813.4393, 838.4906, 842.4641, 846.4475, 848.4780, 850.0118, 853.4691, 856.4822, 864.4857, 865.9818, 868.5015, 868.5015, 870.4977, 876.9884, 882.5173, 882.5173, 892.9574, 892.9574, 896.3969, 908.9280, 951.5720, 996.5430, 1017.6157, 1017.6157, 1019.6299, 1033.6429, 1045.5127, 1045.5127, 1051.6522, 1051.6522, 1131.6493, 1147.6777, 1151.6696, 1165.6809, 1165.6809, 1169.5313, 1171.6676, 1179.5499, 1184.6520, 1189.6735, 1203.6858, 1207.6569, 1211.6572, 1225.6708, 1279.7007, 1300.7860, 1316.8134, 1334.8168, 1334.8168, 1440.5756, 1448.8479, 1448.8479, 1475.6846, 1522.7052, 1538.7010, 1554.6993, 1581.7728, 1617.9867, 1617.9867, 1732.0165, 1901.1586, 2015.1949, 2211.0193, 2283.0847, 2305.0740, 2321.0552, 2528.2617

23. [AOA4W2EMU6](#) Mass: 31365 Score: 36 Expect: 33 Matches: 9

Ketohexokinase OS=Bos indicus x Bos taurus OX=30522 GN=KHK PE=4 SV=1

| Observed  | Mr(expt)  | Mr(calc)  | ppm    | Start | End | Miss | Ions | Peptide          |
|-----------|-----------|-----------|--------|-------|-----|------|------|------------------|
| 834.4629  | 833.4556  | 833.4065  | 58.9   | 257   | 263 | 0    | ---  | K.SMQEALR.F      |
| 850.4896  | 849.4823  | 849.4821  | 0.25   | 194   | 200 | 1    | ---  | R.GLYSRVR.K      |
| 850.4896  | 849.4823  | 849.4821  | 0.30   | 194   | 200 | 1    | ---  | R.GLYSRVR.K      |
| 866.4929  | 865.4856  | 865.4116  | 85.5   | 264   | 271 | 0    | ---  | R.FGCQVAGK.K     |
| 1065.6028 | 1064.5955 | 1064.4961 | 93.4   | 273   | 282 | 0    | ---  | K.CGLQGFDGIV.-   |
| 1185.6776 | 1184.6703 | 1184.6454 | 21.0   | 117   | 125 | 1    | ---  | R.FKWIHIEGR.N    |
| 1185.6776 | 1184.6703 | 1184.6454 | 21.0   | 117   | 125 | 1    | ---  | R.FKWIHIEGR.N    |
| 1193.6417 | 1192.6344 | 1192.5911 | 36.4   | 272   | 282 | 1    | ---  | K.KCGLQGFDGIV.-  |
| 1533.7407 | 1532.7334 | 1532.7695 | -23.55 | 137   | 149 | 1    | ---  | R.IEQHNARQPPEK.I |

**No match to:** 813.4393, 838.4906, 842.4641, 846.4475, 848.4780, 850.0118, 853.4691, 856.4822, 864.4857, 865.9818, 868.5015, 868.5015, 870.4977, 876.9884, 882.5173, 882.5173, 892.9574, 892.9574, 896.3969, 908.9280, 951.5720, 996.5430, 1017.6157, 1017.6157, 1019.6299, 1033.6429, 1045.5127, 1045.5127, 1051.6522, 1051.6522, 1131.6493, 1133.6587, 1147.6777, 1151.6696, 1165.6809, 1165.6809, 1169.5313, 1171.6676, 1179.5499, 1184.6520, 1189.6735, 1203.6858, 1207.6569, 1211.6572, 1225.6708, 1279.7007, 1300.7860, 1316.8134, 1334.8168, 1334.8168, 1440.5756, 1448.8479, 1448.8479, 1475.6846, 1522.7052, 1538.7010, 1554.6993, 1581.7728, 1617.9867, 1617.9867, 1732.0165, 1901.1586, 2015.1949, 2211.0193, 2283.0847, 2305.0740, 2321.0552, 2528.2617

24. [AOA4W2G3Z2](#) Mass: 37905 Score: 36 Expect: 35 Matches: 7

Kallikrein related peptidase 11 OS=Bos indicus x Bos taurus OX=30522 GN=KLK11 PE=3 SV=1

| Observed  | Mr(expt)  | Mr(calc)  | ppm    | Start | End | Miss | Ions | Peptide                     |
|-----------|-----------|-----------|--------|-------|-----|------|------|-----------------------------|
| 848.4780  | 847.4707  | 847.4473  | 27.6   | 202   | 208 | 0    | ---  | R.NDIMLVK.M + Oxidation (M) |
| 951.5720  | 950.5647  | 950.4862  | 82.7   | 332   | 338 | 0    | ---  | K.YVDWIQK.T                 |
| 1179.5499 | 1178.5426 | 1178.6482 | -89.54 | 322   | 331 | 1    | ---  | K.KPGVYTKVCK.Y              |
| 1184.6520 | 1183.6447 | 1183.6747 | -25.32 | 138   | 148 | 0    | ---  | R.LLCGATLIAPR.W             |
| 1211.6572 | 1210.6499 | 1210.6604 | -8.69  | 256   | 265 | 1    | ---  | R.CANVTIIKHR.E              |
| 2015.1949 | 2014.1876 | 2013.9908 | 97.7   | 181   | 198 | 1    | ---  | R.TATKSPFPHDPFNNSLPNK.D     |
| 2283.0847 | 2282.0774 | 2282.0975 | -8.78  | 161   | 180 | 1    | ---  | R.YVVLGAHSLGRQDGCQTR.T      |

**No match to:** 813.4393, 834.4629, 838.4906, 842.4641, 846.4475, 848.4780, 850.0118, 853.4691, 856.4822, 864.4857, 865.9818, 866.4929, 868.5015, 868.5015, 870.4977, 876.9884, 882.5173, 882.5173, 892.9574, 892.9574, 896.3969, 908.9280, 996.5430, 1017.6157, 1017.6157, 1019.6299, 1033.6429, 1045.5127, 1045.5127, 1051.6522, 1051.6522, 1065.6028, 1131.6493, 1133.6587, 1147.6777, 1151.6696, 1165.6809, 1165.6809, 1169.5313, 1171.6676, 1185.6776, 1185.6776, 1189.6735, 1193.6417, 1203.6858, 1207.6569, 1225.6708, 1279.7007, 1300.7860, 1316.8134, 1334.8168, 1334.8168, 1440.5756, 1448.8479, 1448.8479, 1475.6846, 1522.7052, 1533.7407, 1538.7010, 1554.6993, 1581.7728, 1617.9867, 1617.9867, 1732.0165, 1901.1586, 2211.0193, 2305.0740, 2321.0552, 2528.2617

25. [FIN4M1](#) Mass: 37905 Score: 36 Expect: 35 Matches: 7

Kallikrein related peptidase 11 OS=Bos taurus OX=9913 GN=KLK11 PE=3 SV=3

| Observed  | Mr(expt)  | Mr(calc)  | ppm    | Start | End | Miss | Ions | Peptide                     |
|-----------|-----------|-----------|--------|-------|-----|------|------|-----------------------------|
| 848.4780  | 847.4707  | 847.4473  | 27.6   | 202   | 208 | 0    | ---  | R.NDIMLVK.M + Oxidation (M) |
| 951.5720  | 950.5647  | 950.4862  | 82.7   | 332   | 338 | 0    | ---  | K.YVDWIQK.T                 |
| 1179.5499 | 1178.5426 | 1178.6482 | -89.54 | 322   | 331 | 1    | ---  | K.KPGVYTKVCK.Y              |
| 1184.6520 | 1183.6447 | 1183.6747 | -25.32 | 138   | 148 | 0    | ---  | R.LLCGATLIAPR.W             |
| 1211.6572 | 1210.6499 | 1210.6604 | -8.69  | 256   | 265 | 1    | ---  | R.CANVTIIKHR.E              |
| 2015.1949 | 2014.1876 | 2013.9908 | 97.7   | 181   | 198 | 1    | ---  | R.TATKSPFPHDPFNNSLPNK.D     |
| 2283.0847 | 2282.0774 | 2282.0975 | -8.78  | 161   | 180 | 1    | ---  | R.YVVLGAHSLGRQDGCQTR.T      |

**No match to:** 813.4393, 834.4629, 838.4906, 842.4641, 846.4475, 850.0118, 850.4896, 850.4896, 853.4691, 856.4822, 864.4857, 865.9818, 866.4929, 868.5015, 868.5015, 870.4977, 876.9884, 882.5173, 882.5173, 892.9574, 892.9574, 896.3969, 908.9280, 996.5430, 1017.6157, 1017.6157, 1019.6299, 1033.6429, 1045.5127, 1045.5127, 1051.6522, 1051.6522, 1065.6028, 1131.6493, 1133.6587, 1147.6777, 1151.6696, 1165.6809, 1165.6809, 1169.5313, 1171.6676, 1185.6776, 1185.6776, 1189.6735, 1193.6417, 1203.6858, 1207.6569, 1225.6708, 1279.7007, 1300.7860, 1316.8134, 1334.8168, 1334.8168, 1440.5756, 1448.8479, 1448.8479, 1475.6846, 1522.7052, 1533.7407, 1538.7010, 1554.6993, 1581.7728, 1617.9867, 1617.9867, 1732.0165, 1901.1586, 2211.0193, 2305.0740, 2321.0552, 2528.2617

26. [AOA4W2H4X6](#) Mass: 31395 Score: 35 Expect: 39 Matches: 9

Ketohexokinase OS=Bos indicus x Bos taurus OX=30522 GN=KHK PE=4 SV=1

| Observed  | Mr(expt)  | Mr(calc)  | ppm    | Start | End | Miss | Ions | Peptide          |
|-----------|-----------|-----------|--------|-------|-----|------|------|------------------|
| 834.4629  | 833.4556  | 833.4065  | 58.9   | 257   | 263 | 0    | ---  | K.SMQEALR.F      |
| 850.4896  | 849.4823  | 849.4821  | 0.25   | 194   | 200 | 1    | ---  | R.GLYSRVR.K      |
| 850.4896  | 849.4823  | 849.4821  | 0.30   | 194   | 200 | 1    | ---  | R.GLYSRVR.K      |
| 866.4929  | 865.4856  | 865.4116  | 85.5   | 264   | 271 | 0    | ---  | R.FGCQVAGK.K     |
| 1065.6028 | 1064.5955 | 1064.4961 | 93.4   | 273   | 282 | 0    | ---  | K.CGLQGFDGIV.-   |
| 1185.6776 | 1184.6703 | 1184.6454 | 21.0   | 117   | 125 | 1    | ---  | R.FKWIHIEGR.N    |
| 1185.6776 | 1184.6703 | 1184.6454 | 21.0   | 117   | 125 | 1    | ---  | R.FKWIHIEGR.N    |
| 1193.6417 | 1192.6344 | 1192.5911 | 36.4   | 272   | 282 | 1    | ---  | K.KCGLQGFDGIV.-  |
| 1533.7407 | 1532.7334 | 1532.7695 | -23.55 | 137   | 149 | 1    | ---  | R.IEQHNARQPPEK.I |

**No match to:** 813.4393, 838.4906, 842.4641, 846.4475, 848.4780, 850.0118, 853.4691, 856.4822, 864.4857, 865.9818, 868.5015, 868.5015, 870.4977, 876.9884, 882.5173, 882.5173, 892.9574, 892.9574, 896.3969, 908.9280, 951.5720, 996.5430, 1017.6157, 1017.6157, 1019.6299, 1033.6429, 1045.5127, 1045.5127, 1051.6522, 1051.6522, 1131.6493, 1133.6587, 1147.6777, 1151.6696, 1165.6809, 1165.6809, 1169.5313, 1171.6676, 1179.5499, 1184.6520, 1189.6735, 1203.6858, 1207.6569, 1211.6572, 1225.6708, 1279.7007, 1300.7860, 1316.8134, 1334.8168, 1334.8168, 1440.5756, 1448.8479, 1448.8479, 1475.6846, 1522.7052, 1538.7010, 1554.6993, 1581.7728, 1617.9867, 1617.9867, 1732.0165, 1901.1586, 2015.1949, 2211.0193, 2283.0847, 2305.0740, 2321.0552, 2528.2617

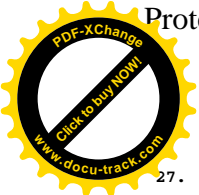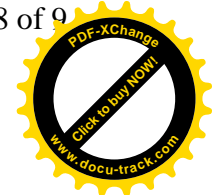

27. [A0A4W2C9V0](#) Mass: 38733 Score: 35 Expect: 40 Matches: 8  
Uncharacterized protein OS=Bos indicus x Bos taurus OX=30522 GN=MFGE8 PE=4 SV=1
- | Observed  | Mr(expt)  | Mr(calc)  | ppm    | Start | End | Miss | Ions | Peptide                   |
|-----------|-----------|-----------|--------|-------|-----|------|------|---------------------------|
| 838.4906  | 837.4833  | 837.4232  | 71.8   | 105   | -   | 112  | 0    | R.AGSAEYLK.T              |
| 842.4641  | 841.4568  | 841.4446  | 14.5   | 57    | -   | 63   | 0    | R.WAPELAR.L               |
| 868.5015  | 867.4942  | 867.4086  | 98.7   | 116   | -   | 123  | 0    | K.VAYSTDGR.Q              |
| 868.5015  | 867.4943  | 867.4086  | 98.7   | 116   | -   | 123  | 0    | K.VAYSTDGR.Q              |
| 1171.6676 | 1170.6603 | 1170.6833 | -19.63 | 255   | -   | 265  | 1    | K.RVTGIITQGAR.D           |
| 1193.6417 | 1192.6344 | 1192.6353 | -0.73  | 124   | -   | 133  | 0    | R.QFQFIQVAGR.S            |
| 1522.7052 | 1521.6979 | 1521.8317 | -87.90 | 323   | -   | 334  | 1    | R.FVRIQPVVHNR.I           |
| 2211.0193 | 2210.0120 | 2210.1154 | -46.77 | 92    | -   | 112  | 1    | K.MWVTGVVTTQASRAGSAEYLK.T |
- No match to: 813.4393, 834.4629, 846.4475, 848.4780, 850.0118, 850.4896, 850.4896, 853.4691, 856.4822, 864.4857, 865.9818, 866.4929, 870.4977, 876.9884, 882.5173, 882.5173, 892.9574, 892.9574, 896.3969, 908.9280, 951.5720, 996.5430, 1017.6157, 1017.6157, 1019.6299, 1033.6429, 1045.5127, 1045.5127, 1051.6522, 1051.6522, 1065.6028, 1131.6493, 1133.6587, 1147.6777, 1151.6696, 1165.6809, 1165.6809, 1169.5313, 1179.5499, 1184.6520, 1185.6776, 1185.6776, 1189.6735, 1203.6858, 1207.6569, 1211.6572, 1225.6708, 1279.7007, 1300.7860, 1316.8134, 1334.8168, 1334.8168, 1440.5756, 1448.8479, 1448.8479, 1475.6846, 1533.7407, 1538.7010, 1554.6993, 1581.7728, 1617.9867, 1617.9867, 1732.0165, 1901.1586, 2015.1949, 2283.0847, 2305.0740, 2321.0552, 2528.2617
28. [A0A4W2F3R1](#) Mass: 41965 Score: 34 Expect: 51 Matches: 9  
Reverse transcriptase domain-containing protein OS=Bos indicus x Bos taurus OX=30522 PE=4 SV=1
- | Observed  | Mr(expt)  | Mr(calc)  | ppm    | Start | End | Miss | Ions | Peptide                     |
|-----------|-----------|-----------|--------|-------|-----|------|------|-----------------------------|
| 834.4629  | 833.4556  | 833.5044  | -58.57 | 173   | -   | 179  | 1    | K.SLLMKVK.E + Oxidation (M) |
| 848.4780  | 847.4707  | 847.4287  | 49.6   | 178   | -   | 184  | 1    | K.VKEESEK.V                 |
| 1131.6493 | 1130.6420 | 1130.5720 | 61.9   | 16    | -   | 25   | 0    | R.ELPDVQAGFR.K              |
| 1133.6587 | 1132.6514 | 1132.6162 | 31.1   | 242   | -   | 251  | 0    | K.VMTNLSILK.S               |
| 1179.5499 | 1178.5426 | 1178.5655 | -19.40 | 334   | -   | 342  | 0    | R.QYFGHLMQR.V               |
| 1193.6417 | 1192.6344 | 1192.5836 | 42.6   | 89    | -   | 99   | 0    | R.NLYAGQEATAR.T             |
| 1533.7407 | 1532.7334 | 1532.7578 | -15.92 | 317   | -   | 330  | 0    | K.EISPGCSLEGLMLK.L          |
| 1554.6993 | 1553.6920 | 1553.7694 | -49.80 | 76    | -   | 88   | 0    | K.EMGIPDHLTCLLR.N           |
| 1581.7728 | 1580.7655 | 1580.7697 | -2.65  | 49    | -   | 60   | 1    | R.KNIYFCFIDYAK.A            |
- No match to: 813.4393, 838.4906, 842.4641, 846.4475, 850.0118, 850.4896, 850.4896, 853.4691, 856.4822, 864.4857, 865.9818, 866.4929, 868.5015, 868.5015, 870.4977, 876.9884, 882.5173, 882.5173, 892.9574, 892.9574, 896.3969, 908.9280, 951.5720, 996.5430, 1017.6157, 1017.6157, 1019.6299, 1033.6429, 1045.5127, 1045.5127, 1051.6522, 1051.6522, 1065.6028, 1147.6777, 1151.6696, 1165.6809, 1165.6809, 1169.5313, 1171.6676, 1184.6520, 1185.6776, 1185.6776, 1189.6735, 1203.6858, 1207.6569, 1211.6572, 1225.6708, 1279.7007, 1300.7860, 1316.8134, 1334.8168, 1334.8168, 1440.5756, 1448.8479, 1448.8479, 1475.6846, 1522.7052, 1538.7010, 1617.9867, 1617.9867, 1732.0165, 1901.1586, 2015.1949, 2211.0193, 2283.0847, 2305.0740, 2321.0552, 2528.2617
29. [A0A4W2IP26](#) Mass: 92361 Score: 34 Expect: 60 Matches: 11  
Nibrin OS=Bos indicus x Bos taurus OX=30522 GN=NBEN PE=4 SV=1
- | Observed  | Mr(expt)  | Mr(calc)  | ppm    | Start | End | Miss | Ions | Peptide                                  |
|-----------|-----------|-----------|--------|-------|-----|------|------|------------------------------------------|
| 846.4475  | 845.4402  | 845.4494  | -10.87 | 305   | -   | 311  | 0    | R.LITEENK.E                              |
| 951.5720  | 950.5647  | 950.5073  | 60.4   | 594   | -   | 601  | 0    | K.SLPTENLK.S                             |
| 1131.6493 | 1130.6420 | 1130.6118 | 26.8   | 137   | -   | 146  | 0    | K.MQNGLSQILK.S                           |
| 1147.6777 | 1146.6704 | 1146.6067 | 55.6   | 137   | -   | 146  | 0    | K.MQNGLSQILK.S + Oxidation (M)           |
| 1189.6735 | 1188.6662 | 1188.5775 | 74.7   | 771   | -   | 779  | 0    | K.NTELEEWLR.Q                            |
| 1207.6569 | 1206.6496 | 1206.6318 | 14.8   | 438   | -   | 447  | 1    | K.EIKIFGMEPK.C + Oxidation (M)           |
| 1316.8134 | 1315.8061 | 1315.6925 | 86.4   | 151   | -   | 161  | 1    | R.VTFGVFESKFR.V                          |
| 1522.7052 | 1521.6979 | 1521.8416 | -94.39 | 16    | -   | 29   | 1    | R.LPGLWASGLPERAR.C                       |
| 1538.7010 | 1537.6937 | 1537.7386 | -29.17 | 498   | -   | 510  | 0    | R.GWPSQHQQTNSIR.D                        |
| 2211.0193 | 2210.0120 | 2210.0559 | -19.84 | 539   | -   | 557  | 0    | R.METSCSLLEQTQPTSLIR.K + Oxidation (M)   |
| 2528.2617 | 2527.2544 | 2527.1761 | 31.0   | 771   | -   | 790  | 1    | K.NTELEEWLRQEMEVDNQHAK.E + Oxidation (M) |
- No match to: 813.4393, 834.4629, 838.4906, 842.4641, 848.4780, 850.0118, 850.4896, 850.4896, 853.4691, 856.4822, 864.4857, 865.9818, 866.4929, 868.5015, 868.5015, 870.4977, 876.9884, 882.5173, 882.5173, 892.9574, 892.9574, 896.3969, 908.9280, 996.5430, 1017.6157, 1017.6157, 1019.6299, 1033.6429, 1045.5127, 1045.5127, 1051.6522, 1051.6522, 1065.6028, 1133.6587, 1151.6696, 1165.6809, 1165.6809, 1169.5313, 1171.6676, 1179.5499, 1184.6520, 1185.6776, 1185.6776, 1193.6417, 1203.6858, 1211.6572, 1225.6708, 1279.7007, 1300.7860, 1334.8168, 1334.8168, 1440.5756, 1448.8479, 1448.8479, 1475.6846, 1533.7407, 1554.6993, 1581.7728, 1617.9867, 1617.9867, 1732.0165, 1901.1586, 2015.1949, 2283.0847, 2305.0740, 2321.0552
30. [A0ALC9HI59](#) Mass: 67468 Score: 34 Expect: 60 Matches: 9  
LS037 OS=Lumpy skin disease virus OX=59509 GN=LW037 PE=4 SV=1
- | Observed  | Mr(expt)  | Mr(calc)  | ppm    | Start | End | Miss | Ions | Peptide                                  |
|-----------|-----------|-----------|--------|-------|-----|------|------|------------------------------------------|
| 846.4475  | 845.4402  | 845.4793  | -46.19 | 272   | -   | 278  | 1    | R.VNKNMLK.L                              |
| 853.4691  | 852.4618  | 852.4276  | 40.2   | 1     | -   | 6    | 1    | -MDFIRR.K + Oxidation (M)                |
| 856.4822  | 855.4749  | 855.4854  | -12.28 | 449   | -   | 455  | 1    | K.KFSLFSK.N                              |
| 1065.6028 | 1064.5955 | 1064.5695 | 24.5   | 317   | -   | 324  | 1    | K.KYFIGFYK.E                             |
| 1184.6520 | 1183.6447 | 1183.5945 | 42.4   | 546   | -   | 555  | 1    | K.TNHLTNNDKK.Y                           |
| 1279.7007 | 1278.6934 | 1278.6707 | 17.7   | 108   | -   | 118  | 0    | K.TLVSELFDDK.F                           |
| 1901.1586 | 1900.1513 | 1900.0492 | 53.7   | 484   | -   | 499  | 1    | K.ILSHLKCVEDVTVFIK.F                     |
| 2015.1949 | 2014.1876 | 2014.0081 | 89.1   | 427   | -   | 443  | 1    | K.EKDPYILYNGMLTNISK.V + Oxidation (M)    |
| 2283.0847 | 2282.0774 | 2282.1616 | -36.90 | 429   | -   | 448  | 1    | K.DPYILYNGMLTNISKVPSNK.K + Oxidation (M) |
- No match to: 813.4393, 834.4629, 838.4906, 842.4641, 848.4780, 850.0118, 850.4896, 850.4896, 864.4857, 865.9818, 866.4929, 868.5015, 870.4977, 876.9884, 882.5173, 882.5173, 892.9574, 892.9574, 896.3969, 908.9280, 951.5720, 996.5430, 1017.6157, 1017.6157, 1019.6299, 1033.6429, 1045.5127, 1045.5127, 1051.6522, 1051.6522, 1131.6493, 1133.6587, 1147.6777, 1151.6696, 1165.6809, 1165.6809, 1169.5313, 1171.6676, 1179.5499, 1185.6776, 1185.6776, 1189.6735, 1193.6417, 1203.6858, 1207.6569, 1211.6572, 1225.6708, 1300.7860, 1316.8134, 1334.8168, 1334.8168, 1440.5756, 1448.8479, 1448.8479, 1475.6846, 1522.7052, 1533.7407, 1538.7010, 1554.6993, 1581.7728, 1617.9867, 1617.9867, 1732.0165, 1901.1586, 2015.1949, 2211.0193, 2305.0740, 2321.0552, 2528.2617

## Search Parameters

Type of search : Sequence Query  
 Enzyme : Trypsin  
 Fixed modifications : [Carbamidomethyl \(C\)](#)  
 Variable modifications : [Oxidation \(M\)](#)  
 Mass values : Monoisotopic



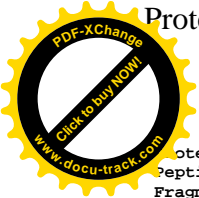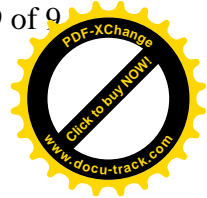

Protein Mass : Unrestricted  
Peptide Mass Tolerance :  $\pm 100$  ppm  
Fragment Mass Tolerance :  $\pm 0.3$  Da  
Max Missed Cleavages : 1  
Instrument type : MALDI-TOF-TOF

Query1 (813.4393,1+): <no title>  
Query2 (834.4629,1+): <no title>  
Query3 (838.4906,1+): <no title>  
Query4 (842.4641,1+): <no title>  
Query5 (846.4475,1+): <no title>  
Query6 (848.4780,1+): <no title>  
Query7 (850.0118,1+): <no title>  
Query8 (850.4896,1+): Locus:1..14.0.6  
Query9 (850.4896,1+): <no title>  
Query10 (853.4691,1+): <no title>  
Query11 (856.4822,1+): <no title>  
Query12 (864.4857,1+): <no title>  
Query13 (865.9818,1+): <no title>  
Query14 (866.4929,1+): <no title>  
Query15 (868.5015,1+): <no title>  
Query16 (868.5015,1+): Locus:1..14.0.11  
Query17 (870.4977,1+): <no title>  
Query18 (876.9884,1+): <no title>  
Query19 (882.5173,1+): Locus:1..14.0.1  
Query20 (882.5173,1+): <no title>  
Query21 (892.9574,1+): <no title>  
Query22 (892.9574,1+): Locus:1..14.0.10  
Query23 (896.3969,1+): <no title>  
Query24 (908.9280,1+): <no title>  
Query25 (951.5720,1+): <no title>  
Query26 (996.5430,1+): <no title>  
Query27 (1017.6157,1+): <no title>  
Query28 (1017.6157,1+): Locus:1..14.0.12  
Query29 (1019.6299,1+): <no title>  
Query30 (1033.6429,1+): <no title>  
Query31 (1045.5127,1+): <no title>  
Query32 (1045.5127,1+): Locus:1..14.0.8  
Query33 (1051.6522,1+): <no title>  
Query34 (1051.6522,1+): Locus:1..14.0.2  
Query35 (1065.6028,1+): <no title>  
Query36 (1131.6493,1+): <no title>  
Query37 (1133.6587,1+): <no title>  
Query38 (1147.6777,1+): <no title>  
Query39 (1151.6696,1+): <no title>  
Query40 (1165.6809,1+): <no title>  
Query41 (1165.6809,1+): Locus:1..14.0.3  
Query42 (1169.5313,1+): <no title>  
Query43 (1171.6676,1+): <no title>  
Query44 (1179.5499,1+): <no title>  
Query45 (1184.6520,1+): <no title>  
Query46 (1185.6776,1+): <no title>  
Query47 (1185.6776,1+): Locus:1..14.0.7  
Query48 (1189.6735,1+): <no title>  
Query49 (1193.6417,1+): <no title>  
Query50 (1203.6858,1+): <no title>  
Query51 (1207.6569,1+): <no title>  
Query52 (1211.6572,1+): <no title>  
Query53 (1225.6708,1+): <no title>  
Query54 (1279.7007,1+): <no title>  
Query55 (1300.7860,1+): <no title>  
Query56 (1316.8134,1+): <no title>  
Query57 (1334.8168,1+): Locus:1..14.0.4  
Query58 (1334.8168,1+): <no title>  
Query59 (1440.5756,1+): <no title>  
Query60 (1448.8479,1+): <no title>  
Query61 (1448.8479,1+): Locus:1..14.0.9  
Query62 (1475.6846,1+): <no title>  
Query63 (1522.7052,1+): <no title>  
Query64 (1533.7407,1+): <no title>  
Query65 (1538.7010,1+): <no title>  
Query66 (1554.6993,1+): <no title>  
Query67 (1581.7728,1+): <no title>  
Query68 (1617.9867,1+): Locus:1..14.0.5  
Query69 (1617.9867,1+): <no title>  
Query70 (1732.0165,1+): <no title>  
Query71 (1901.1586,1+): <no title>  
Query72 (2015.1949,1+): <no title>  
Query73 (2211.0193,1+): <no title>  
Query74 (2283.0847,1+): <no title>  
Query75 (2305.0740,1+): <no title>  
Query76 (2321.0552,1+): <no title>  
Query77 (2528.2617,1+): <no title>

Mascot: <http://www.matrixscience.com/>
